# Supplementary material for: Enantioselective synthesis of isochromans and tetrahydroisoquinolines by C–H insertion of donor/donor carbenes
Source: PubMed Central journal article supplement — Chem Sci. 2019 Nov 13;11(2):494–8. doi: 10.1039/c9sc05111b (PMC7439777; doi:10.1039/c9sc05111b), 2019-11-13

# Enantioselective Synthesis of Isochromans and Tetrahydroisoquinolines by C–H Insertion of Donor/Donor Carbenes

## Supporting Information

*Leslie A. Nickerson, Benjamin D. Bergstrom, Mingchun Gao, Yuan-Shin Shiue, Croix J. Laconsay, Matthew R. Culberson, Walker A. Knauss, James C. Fettinger, Dean J. Tantillo, Jared T. Shaw\**

Chemistry Department, University of California, Davis, One Shields Ave, Davis, CA 95616 (USA)

E-mail: [jtshaw@ucdavis.edu](mailto:jtshaw@ucdavis.edu)

### Table of Contents

|                                              |     |
|----------------------------------------------|-----|
| Experimental Procedures .....                | 2   |
| General Comments.....                        | 2   |
| General Procedures .....                     | 2   |
| Isochroman Characterization .....            | 7   |
| Tetrahydroisoquinoline Characterization..... | 39  |
| Computational Details .....                  | 45  |
| X-Ray Data .....                             | 52  |
| Isochroman <b>11c</b> .....                  | 52  |
| Isochroman <b>13b</b> .....                  | 59  |
| Isochroman <b>17c</b> .....                  | 65  |
| Tetrahydroisoquinoline <b>23c</b> .....      | 79  |
| References.....                              | 85  |
| HPLC Data.....                               | 87  |
| NMR Data.....                                | 128 |

## EXPERIMENTAL DETAILS

**General Comments.** Chemicals were purchased and used without further purification unless otherwise specified. All reactions using anhydrous solvents were carried out under an atmosphere of industrial argon in flame-dried glassware with magnetic stirring. Anhydrous solvent was dispensed from a solvent purification system that passes solvent through two columns of dry neutral alumina. Reactions were monitored by thin layer chromatography (TLC, Merck), and detected by examination under UV light (254 nm and 365 nm). Flash column chromatography was performed using silica gel [230–400 mesh (40–63  $\mu\text{m}$ )]. Extracts were concentrated *in vacuo* using both a rotary evaporator (bath temperatures up to 40 °C) at a pressure of  $\geq 10$  torr (diaphragm pump). High vacuum procedures were carried out at room temperature at a pressure of 1 mtorr (diaphragm pump) or  $\geq 1000$  mtorr (oil pump).  $^1\text{H}$  and proton-decoupled  $^{13}\text{C}$  spectra were measured in  $\text{CDCl}_3$  at 400, or 600 MHz, and 101 or 151 MHz respectively unless otherwise noted. All spectra in  $\text{CDCl}_3$  were referenced at TMS = 0 ppm. Multiplicities are given as: s (singlet), d (doublet), t (triplet), q (quartet), p (pentet), m (multiplet), or combinations of these signals. Apparent signals are indicated with *app.* and are used when signals with multiple couplings appear to form a certain peak type. High-resolution mass spectrometry was performed on positive mode and ESI/Orbitrap<sup>TM</sup>, ESI/TOF, and CI/TOF techniques were generally used. For substrates **15b**, **17a**, **76**, **80**, high-resolution mass spectrometry using the aforementioned techniques was not achieved; low-resolution mass spectrometry using an Advion<sup>©</sup> ASAP-APCI-MS was achieved and the corresponding data is reported for those samples. Melting points were taken on an EZ-melting apparatus and were uncorrected. Infrared spectra were taken on a Bruker Tensor 27 spectrometer. All microwave experiments were run in a Biotage Initiator EXP EU 400W microwave synthesizer 2.0 serial number 11031. NOTE: it is necessary that the  $\text{MnO}_2$  used for the oxidation of hydrazones be  $\sim 85\%$  pure with an average particle size of 2 microns, appearing as a fine black powder (e.g. Oakwood Chemical, CAS #: 1313-13-9, cat. #: 094454, lot #: 094454K03K).

**General Procedure A (alkylation of alcohols).** Following a modified literature procedure,<sup>1</sup> NaH (60% suspension in mineral oil, 1.5-3.0 equiv) and anhydrous THF (0.56 M with NaH) were added to a flame-dried round bottom flask. The suspension of NaH in THF was stirred and cooled to 0 °C. To the flask was added a solution of the desired alcohol (1.0 equiv) in anhydrous THF (0.78 M) dropwise and stirred for 2 h. The respective bromide (1.1-1.7 equiv) was added dropwise and the reaction was warmed to rt and stirred for 2-16 hours. Upon completion by TLC, the reaction was quenched at 0 °C with sat. aq.  $\text{NH}_4\text{Cl}$  or  $\text{H}_2\text{O}$  (20 mL) dropwise. The crude mixture was extracted with EtOAc (3 X 40 mL) and the combined organic layers were washed with brine (1 X 30 mL). The organic layer was dried over  $\text{Na}_2\text{SO}_4$ , filtered, and concentrated *in vacuo*. The crude reaction mixture was purified by flash column chromatography to yield the desired ether.

**General Procedure B (alkylation of amides).** Following a modified literature procedure,<sup>2</sup> NaH (60% suspension in mineral oil, 1.5 equiv) and anhydrous THF (3.5 M with NaH) were added to a flame-dried round bottom flask. The suspension of NaH in THF was stirred and cooled to 0 °C. To the flask was added a solution of the desired amide (1.0 equiv) in THF (0.67 M) dropwise and the mixture was allowed to warm to rt over 2 h. Aryl Bromide **57** (1.1 equiv) was added to the mixture at rt and the reaction was stirred for 16 h. Upon completion by TLC, the reaction was quenched with  $\text{H}_2\text{O}$  (30 mL) and extracted with EtOAc (3 X 40 mL). The combined organic layers were washed with



brine (1 X 30 mL), dried over Na<sub>2</sub>SO<sub>4</sub>, filtered, and concentrated *in vacuo*. The crude reaction mixture was purified by flash column chromatography to yield the desired amide.

**General Procedure C (alkylation of alcohols).** To a flame-dried round bottom flask was added NaH (60% suspension in mineral oil, 3.0 equiv) and anhydrous THF (1.2 M with NaH). The suspension of NaH in THF was stirred for 15 min and cooled to 0 °C. To the flask was added a solution of the respective alcohol (2.5 equiv) in anhydrous THF (6.0 M) and stirred for 1 h. To the flask was added a solution of the desired alkyl/aryl halide (1.0 equiv) in THF (0.8 M) followed by tetrabutyl ammonium iodide (0.14 equiv). The reaction was allowed to warm to rt overnight. Upon completion by TLC, the reaction was quenched with sat. aq. NH<sub>4</sub>Cl (20-50 mL) and the crude mixture was extracted with EtOAc (3 X 40 mL). The combined organic layers were washed with H<sub>2</sub>O (1 X 30 mL) and brine (1 X 30 mL). The organic layer was dried over Na<sub>2</sub>SO<sub>4</sub>, filtered, and concentrated *in vacuo*. The crude reaction mixture was purified by flash column chromatography to yield the desired ether.

**General Procedure D (synthesis of morpholine amide).** Following a modified literature procedure,<sup>3</sup> Pd(OAc)<sub>2</sub> (0.025 equiv), Xantphos (0.05 equiv), and potassium phosphate tribasic (K<sub>3</sub>PO<sub>4</sub>, 3 equiv) were added to a dry 20 mL  $\mu$ W tube or a 25 mL round bottom flask under argon and the tube was sealed. A solution of the relevant aryl halide (1 equiv) in toluene (0.5 M) was added to the tube followed by morpholine (1.5 equiv) which had been freshly filtered through basic alumina. A vent needle was placed in the septum of the  $\mu$ W tube and the headspace was purged with CO (g) from a balloon for 30 sec. The vent needle was removed and the reaction was kept under an atmosphere of CO with the balloon in the headspace. The reaction was heated to 100 °C overnight. Upon completion by TLC, the reaction was diluted with EtOAc (10 mL) and filtered through Celite. The crude reaction mixture was purified by flash column chromatography to yield the desired morpholine amide. *Morpholine amides often showed significant rotamer distortion in the <sup>1</sup>H and <sup>13</sup>C NMR.*

**General Procedure E (addition to morpholine amide).** To a flame-dried round bottom flask was added the desired morpholine amide (1.0 equiv) in THF (0.1-0.17 M) and the solution was cooled to -78 °C. The respective aryl/alkyl lithium reagent (2 equiv) was added dropwise and the reaction was allowed to warm to rt overnight. The reaction was quenched at -78 °C with sat. NH<sub>4</sub>Cl in CH<sub>3</sub>OH (10 mL) and the mixture was allowed to warm to rt. H<sub>2</sub>O (10 mL) was added and the crude mixture was extracted with EtOAc (3 X 30 mL) and the combined organic layers were washed with brine (1 X 20 mL). The organic layer was dried over Na<sub>2</sub>SO<sub>4</sub>, filtered, and concentrated *in vacuo*. The crude reaction mixture was purified by flash column chromatography to yield the desired ketone.

**General Procedure F (addition to morpholine amide).** To a flame-dried round bottom flask was added the desired morpholine amide (1.0 equiv) in THF (0.1 M) and the solution was cooled to -78 °C. The respective aryl lithium (2 equiv) was added dropwise and reacted for 10 min. Then the reaction was allowed to warm to rt for 1 h. The reaction was quenched at -78 °C with sat. aq. NH<sub>4</sub>Cl (10 mL) and the crude mixture was extracted with EtOAc (3 X 30 mL) and the combined organic layers were washed with brine (1 X 20 mL). The organic layer was dried over Na<sub>2</sub>SO<sub>4</sub>, filtered, and concentrated *in vacuo*. The crude reaction mixture was purified by flash column chromatography to yield the desired ketone.

**General Procedure G (addition to morpholine amide).** To a flame-dried round bottom flask was added the desired aryl halide (1.5 equiv) in THF (0.26 M) and the solution was cooled to -78 °C. To the solution was added *n*-butyllithium (1.6 equiv) dropwise and the solution was stirred for 2 h at -78 °C. The respective morpholine amide (1.0 equiv) in THF (0.44 M) was added to the solution and the reaction was allowed to warm to rt overnight. The reaction was quenched at -78 °C with sat. NH<sub>4</sub>Cl in CH<sub>3</sub>OH (10 mL) and the mixture was allowed to warm to rt. H<sub>2</sub>O (10 mL) was added and the crude mixture was extracted with EtOAc (3 X 30 mL) and the combined organic layers were washed with brine (1 X 20 mL). The organic layer was dried over Na<sub>2</sub>SO<sub>4</sub>, filtered, and concentrated *in vacuo*. The crude reaction mixture was purified by flash column chromatography to yield the desired ketone.

**General Procedure H (synthesis of Weinreb amide).** Following a modified literature procedure,<sup>4</sup> the desired benzoic acid (1.0 equiv) in CH<sub>2</sub>Cl<sub>2</sub> (0.5 M) was added to a flame-dried round bottom flask under argon and equipped with a vent needle. Oxalyl chloride (2.0 equiv) was added dropwise to the solution followed by addition of *N,N*-dimethylformamide (1.3 equiv) and the solution was stirred at rt for 1 h. The mixture was concentrated *in vacuo* and the resulting acid chloride was diluted with CH<sub>2</sub>Cl<sub>2</sub> (0.1 M) and Et<sub>3</sub>N (3.0 equiv) and *N,O*-dimethylhydroxylamine hydrochloride (1.5 equiv) were added. After stirring for 2.5 h the reaction was quenched with sat. aq. NaHCO<sub>3</sub> (175 mL) and the mixture was extracted with CH<sub>2</sub>Cl<sub>2</sub> (3 X 175 mL) and the combined organic layers were washed with NaHCO<sub>3</sub> (2 X 175 mL) and brine (175 mL). The organic layer was dried over Na<sub>2</sub>SO<sub>4</sub>, filtered, and concentrated *in vacuo*. The crude reaction mixture was purified by flash column chromatography to yield the desired Weinreb amide.

**General Procedure I (synthesis of Weinreb amide).** Following a modified literature procedure, to a flame-dried round bottom flask were added *N,O*-dimethylhydroxylamine hydrochloride (1.0 equiv) and CH<sub>2</sub>Cl<sub>2</sub> (0.4 M). Et<sub>3</sub>N (3.0 equiv) was added slowly at 0 °C. Benzoyl chloride (1.0 equiv) was then added dropwise into the mixture the solution was stirred at rt overnight. Upon completion, the reaction was quenched with sat. aq. NaHCO<sub>3</sub> (10 mL) and the mixture was extracted with CH<sub>2</sub>Cl<sub>2</sub> (3 X 30 mL) and the combined organic layers were washed with H<sub>2</sub>O (20 mL) and brine (20 mL). The organic layer was dried over Na<sub>2</sub>SO<sub>4</sub>, filtered, and concentrated *in vacuo*. The crude reaction mixture was purified by flash column chromatography to yield the desired Weinreb amide.

**General Procedure J (addition to Weinreb amide).** Following a modified literature procedure, the desired aryl halide (1.0 equiv) in anhydrous THF (0.1 M) was added to a flame-dried round bottom flask under argon and cooled to -78 °C. To the solution was added *n*-butyllithium in hexanes (1.1 equiv) dropwise and the resulting mixture was stirred at -78 °C for 1-2 h. The relevant Weinreb amide (1.5 equiv) in THF (0.2-1 M) was added to the mixture and the reaction was allowed to warm to rt overnight. The reaction was quenched at -78 °C with sat. aq. NH<sub>4</sub>Cl and was extracted with EtOAc (3 X 20 mL). The combined organic layers were washed with H<sub>2</sub>O (1 X 20 mL) and brine (1 X 20 mL), dried over Na<sub>2</sub>SO<sub>4</sub>, filtered, and concentrated *in vacuo*. The crude reaction mixture was purified by flash column chromatography to yield the desired ketone.

**General Procedure K (Reduction of Ketone).** To a flame-dried round bottom flask were added 1-(2-bromophenyl)ethan-1-one (1.0 equiv) and anhydrous EtOH (0.25 M with ketone). The solution was cooled to 0 °C. To the flask was added NaBH<sub>4</sub> (4.0 equiv) in one portion and stirred for 10 min. The reaction was allowed to warm to rt

overnight. Upon completion by TLC, the reaction was quenched with sat. aq.  $\text{NH}_4\text{Cl}$  (20 mL) and the crude mixture was extracted with EtOAc (3 X 40 mL). The combined organic layers were washed with  $\text{H}_2\text{O}$  (1 X 30 mL) and brine (1 X 30 mL). The organic layer was dried over  $\text{Na}_2\text{SO}_4$ , filtered, and concentrated *in vacuo*. The crude reaction mixture was purified by flash column chromatography to yield the desired alcohol.

**General Procedure L (Alkylation of Alcohol).** To a flame-dried round bottom flask were added 1-(2-bromophenyl)ethan-1-ol (1.0 equiv) and anhydrous THF/DMF (91:9 v/v, 0.18 M with alcohol). NaH (60% suspension in mineral oil, 2.5 equiv) was added portion-wise at 0 °C and the mixture was stirred for 10 min. The respective chloride (1.1 equiv) and TBAI (0.1 equiv) were added to the flask. The reaction was allowed to warm to rt overnight. Upon completion by TLC, the reaction was quenched with  $\text{H}_2\text{O}$  (20 mL) and the crude mixture was extracted with EtOAc (3 X 40 mL). The combined organic layers were washed with brine (1 X 30 mL), dried over  $\text{Na}_2\text{SO}_4$ , filtered, and concentrated *in vacuo*. The crude reaction mixture was purified by flash column chromatography to yield the desired ether.

**General Procedure M (addition to Weinreb amide).** Following a modified literature procedure,<sup>5</sup> the desired aryl halide (1.0 equiv) in anhydrous THF (0.31 M) was added to a flame-dried round bottom flask under argon and cooled to -78 °C. To the solution was added *n*-butyllithium in hexanes (1.3 equiv) dropwise and the resulting mixture was stirred at -78 °C for 2 h. The relevant Weinreb amide (1.2 equiv) in THF (1.2 M) was added to the mixture and the reaction was allowed to warm to rt overnight. The reaction was quenched with sat.  $\text{NH}_4\text{Cl}$  in  $\text{CH}_3\text{OH}$  at -78 °C and upon warming to rt the reaction was extracted with diethyl ether (3 X 20 mL). The combined organic layers were dried over  $\text{Na}_2\text{SO}_4$ , filtered, and concentrated *in vacuo*. The crude reaction mixture was purified by flash column chromatography to yield the desired ketone.

**General Procedure N (carbonylation with benzaldehyde).** Following a modified literature procedure,<sup>6</sup> the desired aryl halide (1.0 equiv), palladium (II) acetate (0.05 equiv), silver (I) oxide (1.2 equiv), benzaldehyde (8.0 equiv), and 70% *tert*-butyl hydroperoxide in  $\text{H}_2\text{O}$  (5.0 equiv) were added to a microwave vial with a stir bar and the microwave vial was sealed. An argon line (or balloon) was added to the vial and the system was heated to 118 °C. When the temperature was reached the argon line/balloon was removed and the mixture was heated overnight. The reaction mixture was cooled to rt, diluted with EtOAc, filtered through Celite with a small pad of silica, and concentrated *in vacuo*. The crude product was purified using flash column chromatography to yield the desired ketone.

**General Procedure O (microwave hydrazone formation).** Following a modified literature procedure,<sup>7</sup> the respective ketone (1.0 equiv) in anhydrous EtOH (0.1 M) was added to a flame-dried 5-25 mL argon-backfilled microwave vial. The solution was sparged with argon for 10-30 min after which AcOH (1.0-1.3 equiv) and anhydrous hydrazine (6-13 equiv) were added and the solution was sparged for an additional 1 min. The vial was heated in a microwave reactor at 150-170 °C for 2-10 hours. The reaction mixture was then concentrated *in vacuo*, dissolved in  $\text{Et}_2\text{O}$  (50 mL), and washed with  $\text{H}_2\text{O}$  (3 X 30 mL). The organic layer was dried over  $\text{Na}_2\text{SO}_4$ , filtered, concentrated *in vacuo*, and purified by flash column chromatography to yield the desired hydrazone. *Hydrazones were often isolated as a mixture of E/Z isomers and were used without further purification. As such  $^1\text{H}$  NMR peaks have been reported only for selected examples. Due to restricted rotation, the hydrazone NMRs often indicated diastereotopic protons.*

**General Procedure P (hydrazone formation).** Following literature precedent,<sup>8</sup> the desired ketone (1 equiv) in anhydrous EtOH (0.06 M) was added to a flame-dried round bottom flask under argon. To the flask was added anhydrous hydrazine (10 equiv.) and glacial acetic acid (0.5 to 2.0 equiv). The reaction was heated to 80 °C for 18-120 h. Upon completion by TLC, the reaction was allowed to cool and EtOH was removed *in vacuo*. The residue was dissolved in diethyl ether (30 mL) and washed with H<sub>2</sub>O (2 X 20 mL) and brine (1 X 20 mL). The organic layer was dried over Na<sub>2</sub>SO<sub>4</sub>, filtered, and concentrated *in vacuo*, and purified by flash column chromatography to yield the desired hydrazone. *Hydrazones were often isolated as a mixture of E/Z isomers or were used without further purification. As such <sup>1</sup>H NMR peaks have been reported only for selected examples. Due to restricted rotation, the hydrazone NMRs often indicated diastereotopic protons.*

**General Procedure Q (one-pot insertion).** Following literature precedent,<sup>7</sup> the desired hydrazone (1.0 equiv) was added to a flame-dried scintillation vial under argon followed by anhydrous CH<sub>2</sub>Cl<sub>2</sub> or CH<sub>3</sub>CN (0.015 M). The vial was cooled to 0 °C and manganese (IV) oxide (MnO<sub>2</sub>, 8.0 equiv) and the desired rhodium catalyst (0.01 equiv) were added. The resulting dark suspension was warmed to room temperature and allowed to stir from 10 min to 12 h. The crude reaction mixture was filtered over Celite, concentrated *in vacuo*, and purified by flash column chromatography to yield the desired insertion product.

**General Procedure R (sequential one-pot insertion).** Following literature precedent,<sup>7</sup> the desired hydrazone (1.0 equiv) was added to a flame-dried scintillation vial under argon followed by anhydrous CH<sub>2</sub>Cl<sub>2</sub> or CH<sub>3</sub>CN (0.015-0.017 M). To the vial was added manganese (IV) oxide (MnO<sub>2</sub>, 8.0 equiv) and the resulting dark suspension was stirred until full conversion of the starting material was observed by TLC. Upon pausing stirring, a color change from clear to magenta was observed from formation of the diazo. The vial was then cooled to 0 °C and the desired rhodium catalyst was added (0.01 equiv). The reaction mixture was allowed to warm to rt for 10 min to 24 h. The crude reaction mixture was filtered over Celite to remove MnO<sub>2</sub>, concentrated *in vacuo*, and purified by flash column chromatography to yield the desired insertion product.

**General Procedure S (two-pot insertion).** Following literature precedent,<sup>7</sup> the desired hydrazone (1.0 equiv) was added to a flame-dried scintillation vial under argon followed by anhydrous CH<sub>2</sub>Cl<sub>2</sub> or CH<sub>3</sub>CN (0.015 M). To the vial was added manganese (IV) oxide (MnO<sub>2</sub>, 8.0 equiv) and the resulting dark suspension was stirred until full conversion of the starting material was observed by TLC. The reaction mixture was filtered over Celite into a new flame-dried, argon backfilled 20 mL scintillation vial using the same solvent. The magenta solution was cooled to 0 °C and the desired rhodium catalyst was added (0.01 equiv). The reaction mixture was allowed to warm to rt for 10 min to 16 h. The crude reaction mixture was concentrated *in vacuo* and purified by flash column chromatography to yield the desired insertion product.

## ISOCHROMANS

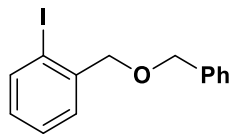

**1-((benzyloxy)methyl)-2-iodobenzene (30)** was synthesized according to General Procedure A using 2-iodobenzyl alcohol (1.000 g, 4.273 mmol) in THF (5.5 mL), NaH (0.292 g, 7.30 mmol) in THF (13 mL), and benzyl bromide (0.87 mL, 7.3 mmol). The crude product was extracted from NH<sub>4</sub>Cl (20 mL) with EtOAc (2 X 40 mL) and washed with brine (1 X 20 mL). The crude material was purified by flash column chromatography (99:1 to 90:10, hexanes:EtOAc) affording **30** as a yellow oil (1.320 g, 95%). <sup>1</sup>H NMR (600 MHz, CDCl<sub>3</sub>) δ 7.83 (dd, *J* = 8.0, 1.3 Hz, 1H), 7.49 (dd, *J* = 7.6, 1.7 Hz, 1H), 7.43 – 7.39 (m, 2H), 7.39 – 7.33 (m, 3H), 7.33 – 7.29 (m, 1H), 7.02 – 6.96 (m, 1H), 4.64 (s, 2H), 4.55 (s, 2H). <sup>1</sup>H NMR data was consistent with reported literature values.<sup>9</sup>

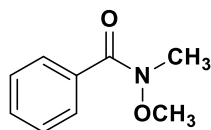

**N-methoxy-N-methylbenzamide (31)** was synthesized according to General Procedure H using benzoic acid (2.000 g, 16.37 mmol) in CH<sub>2</sub>Cl<sub>2</sub> (3.3 mL), oxalyl chloride (2.8 mL, 33 mmol), *N,N*-dimethylformamide (1.64 mL, 21.3 mmol), Et<sub>3</sub>N (6.3 mL, 49 mmol), and *N,O*-dimethylhydroxylamine hydrochloride (2.400 g, 24.60 mmol) in CH<sub>2</sub>Cl<sub>2</sub> (164 mL). The crude product was extracted from NaHCO<sub>3</sub> (100 mL) with CH<sub>2</sub>Cl<sub>2</sub> (3 X 60 mL) and washed with NaHCO<sub>3</sub> (2 X 70 mL) and brine (1 X 70 mL). The crude product was purified by flash column chromatography (90:10 to 70:30, hexanes:EtOAc) affording **31** as a clear oil (1.937 g, 71%). <sup>1</sup>H NMR (600 MHz, CDCl<sub>3</sub>) δ 7.67 (d, *J* = 7.3 Hz, 2H), 7.47 – 7.43 (m, 1H), 7.42 – 7.38 (m, 2H), 3.55 (s, 3H), 3.36 (s, 3H). <sup>1</sup>H NMR data was consistent with literature values.<sup>10</sup>

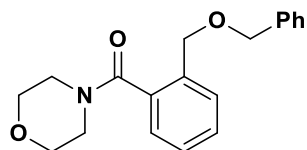

**(2-((benzyloxy)methyl)phenyl)(morpholino)methanone (32)** was synthesized according to General Procedure D using ether **30** (0.500 g, 1.54 mmol), morpholine (0.20 mL, 2.3 mmol), palladium (II) acetate (0.008 g, 0.02 mmol), Xantphos (0.045 g, 0.077 mmol), potassium phosphate tribasic (0.981 g, 4.62 mmol), CO (1 balloon), in toluene (3 mL). The crude product was purified using flash column chromatography (40:60, hexanes:EtOAc) affording **32** as a yellow oil (0.403 g, 84%). <sup>1</sup>H NMR (400 MHz, CDCl<sub>3</sub>) δ 7.46 (d, *J* = 7.6 Hz, 1H), 7.41 – 7.28 (m, 7H), 7.19 (d, *J* = 7.4 Hz, 1H), 4.73 – 4.39 (m, 4H), 3.79 – 3.58 (m, 4H), 3.47 (s, 2H), 3.31 – 3.09 (m, 2H). <sup>1</sup>H NMR was taken at rt and shows a mixture of rotamers.

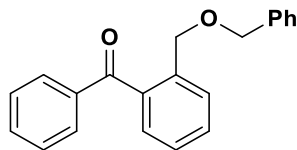

**(2-((benzyloxy)methyl)phenyl)(phenyl)methanone (33).** To a flame-dried vial was added bromobenzene (0.30 mL, 2.8 mmol) in THF (3 mL) and the solution was cooled to  $-78\text{ }^{\circ}\text{C}$ . A 1.7 M solution of *tert*-butyllithium (3.3 mL, 5.68 mmol) was added dropwise to the solution and the mixture was stirred at  $-78\text{ }^{\circ}\text{C}$  for 1 h. A solution of morpholine amide **32** (0.295 g, 0.947 mmol) in THF (5.6 mL) was added dropwise to the solution and the reaction was allowed to warm to rt overnight. The reaction was quenched with sat.  $\text{NH}_4\text{Cl}$  in MeOH (6 mL) at  $-78\text{ }^{\circ}\text{C}$ . The quenched solution was warmed to rt and diluted with water (20 mL). The resulting mixture was extracted with EtOAc (3 X 30 mL), washed with brine (1 X 30 mL), dried over  $\text{Na}_2\text{SO}_4$ , filtered, and concentrated *in vacuo*. The crude product was purified using flash column chromatography (90:10, hexanes:EtOAc) affording **33** as a yellow oil (0.144 g, 50%).  $^1\text{H}$  NMR (600 MHz,  $\text{CDCl}_3$ )  $\delta$  7.79 (d,  $J = 7.8$  Hz, 2H), 7.60 – 7.51 (m, 2H), 7.49 – 7.43 (m, 1H), 7.40 (t,  $J = 7.6$  Hz, 2H), 7.37 – 7.29 (m, 2H), 7.23 – 7.17 (m, 3H), 7.17 – 7.11 (m, 2H), 4.65 (s, 2H), 4.39 (s, 2H);  $^{13}\text{C}$  NMR (151 MHz,  $\text{CDCl}_3$ )  $\delta$  197.91, 137.98, 137.92, 137.89, 137.60, 133.09, 130.45, 130.17, 128.79, 128.65, 128.40, 128.26, 127.66, 127.52, 127.04, 72.82, 70.00; AMM (ESI-TOF)  $m/z$  calcd for  $\text{C}_{21}\text{H}_{18}\text{NaO}_2^+$   $[\text{M}+\text{Na}]^+$  325.1205, found 325.1200.

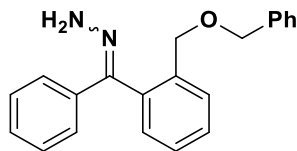

**((2-((benzyloxy)methyl)phenyl)(phenyl)methylene)hydrazine (10a)** was synthesized according to General Procedure O using ketone **33** (0.280 g, 0.926 mmol), hydrazine (0.29 mL, 9.3 mmol), acetic acid (0.06 mL, 1 mmol), and EtOH (9.3 mL) at  $150\text{ }^{\circ}\text{C}$  for 2 h. The crude product was purified by flash column chromatography (100:0 to 70:30, hexanes:EtOAc) affording **10a** as a white foam (0.172 g, 58%).

*Major stereoisomer 10a-1:*  $^1\text{H}$  NMR (600 MHz,  $\text{CDCl}_3$ )  $\delta$  7.69 (d,  $J = 7.6$  Hz, 1H), 7.51 – 7.41 (m, 4H), 7.30 – 7.20 (m, 8H), 7.18 (d,  $J = 7.3$  Hz, 1H), 5.34 (s, 2H), 4.46 (d,  $J = 11.8$  Hz, 1H), 4.43 (d,  $J = 11.7$  Hz, 1H), 4.40 (d,  $J = 11.9$  Hz, 1H), 4.35 (d,  $J = 12.0$  Hz, 1H).

*Minor stereoisomer 10a-2:* (0.028 g, 9%).  $^1\text{H}$  NMR (600 MHz,  $\text{CDCl}_3$ )  $\delta$  7.60 (d,  $J = 7.7$  Hz, 1H), 7.48 – 7.41 (m, 2H), 7.40 – 7.24 (m, 9H), 7.21 (t,  $J = 7.5$  Hz, 1H), 7.14 (d,  $J = 7.7$  Hz, 1H), 5.53 (s, 2H), 4.67 (s, 2H), 4.50 (s, 2H).

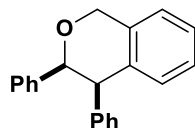

**(3*S*,4*R*)-3,4-diphenylisochromane (11a)** was synthesized according to General Procedure R using hydrazone **10a-1** (0.050 g, 0.16 mmol),  $\text{MnO}_2$  (0.111 g, 1.28 mmol), and  $\text{Rh}_2(\text{R-PTAD})_4$  (0.002 mg, 0.002 mmol) in  $\text{CH}_2\text{Cl}_2$  (11 mL). The crude product was purified by flash column chromatography (100:0 to 97:3, hexanes: EtOAc) affording **11a** as white crystals (0.028 g, 61%, >95:5 dr, 97:3 er).  $^1\text{H}$  NMR (600 MHz,  $\text{CDCl}_3$ )  $\delta$  7.27 – 7.22 (m, 1H), 7.21 – 7.10 (m, 5H), 7.08 – 6.99 (m, 4H), 6.99 – 6.93 (m, 2H), 6.78 – 6.73 (m, 2H), 5.24 (d,  $J = 15.2$  Hz, 1H), 5.12 (d,  $J = 15.3$  Hz,

1H), 5.10 (d,  $J = 3.3$  Hz, 1H), 4.13 (d,  $J = 3.2$  Hz, 1H).;  $^{13}\text{C}$  NMR (151 MHz,  $\text{CDCl}_3$ )  $\delta$  140.8, 140.3, 137.3, 134.3, 130.4, 130.2, 127.8, 127.4, 127.0, 127.0, 126.8, 126.2, 126.0, 124.2, 80.1, 69.2, 50.4; AMM (CI-TOF)  $m/z$  calcd for  $\text{C}_{21}\text{H}_{22}\text{NO}^+ [\text{M}+\text{H}]^+$  304.1696, found 304.1690;  $[\alpha]_D^{25} = -33.4$  ( $c = 0.086$ ,  $\text{CHCl}_3$ ).

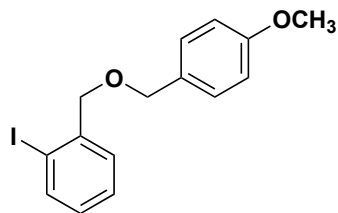

**2-(4-methoxybenzyloxymethyl)iodobenzene (34)** was synthesized according to General Procedure C, using sodium hydride (0.352 g, 8.55 mmol) in THF (10.7 mL), iodobenzyl alcohol (1.001 g, 4.273 mmol) in THF (5.3 mL), tetrabutylammonium iodide (0.224 g, 0.607 mmol), and 4-methoxybenzyl chloride (0.64 mL, 4.7 mmol), reacting for 2 h at 50 °C. The crude product was purified using flash column chromatography (60:40, hexanes: $\text{CH}_2\text{Cl}_2$ ), affording **34** as a yellow oil (1.344 g, 89%).  $^1\text{H}$  NMR (400 MHz,  $\text{CDCl}_3$ )  $\delta$  7.82 (d,  $J = 7.9$  Hz, 1H), 7.47 (d,  $J = 7.1$  Hz, 1H), 7.38 – 7.30 (m, 3H), 6.98 (t,  $J = 7.6$  Hz, 1H), 6.93 – 6.86 (m, 2H), 4.57 (s, 2H), 4.52 (s, 2H), 3.81 (s, 3H);  $^{13}\text{C}$  NMR (101 MHz,  $\text{CDCl}_3$ )  $\delta$  159.0, 140.4, 138.8, 129.8, 129.1, 128.9, 128.6, 127.9, 113.5, 97.7, 75.5, 72.1, 54.9; AMM (ESI-TOF)  $m/z$  calcd for  $\text{C}_{15}\text{H}_{15}\text{INaO}_2^+ [\text{M}+\text{Na}]^+$  377.0009, found 377.0015.

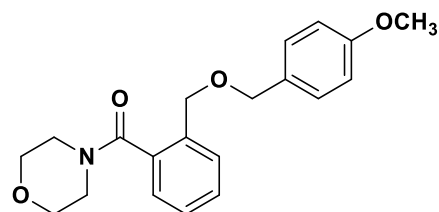

**((4-methoxybenzyl)oxymethyl-phenyl)-morpholin-4-yl-methanone (35)** was synthesized according to General Procedure D, using  $\text{Pd}(\text{OAc})_2$  (0.012 g, 0.052 mmol), Xantphos (0.058 g, 0.10 mmol), and potassium phosphate tribasic (1.280 g, 6.031 mmol), morpholine (0.26 mL, 3.0 mmol), and **34** (0.711 g, 2.00 mmol) in toluene (4.0 mL), reacting at 100 °C for 6.5 h. The crude product was purified using flash column chromatography (20:80, hexanes:EtOAc), affording **35** as a clear oil (0.572 g, 84%).  $^1\text{H}$  NMR (600 MHz,  $\text{CDCl}_3$ )  $\delta$  7.44 (d,  $J = 7.6$  Hz, 1H), 7.37 (t,  $J = 7.5$  Hz, 1H), 7.32 (t,  $J = 7.5$  Hz, 1H), 7.30 – 7.27 (m, 2H), 7.19 (d,  $J = 7.4$  Hz, 1H), 6.91 – 6.89 (m, 1H), 6.89 – 6.87 (m, 1H), 4.64 (br s, 1H), 4.51 (s, 2H), 4.44 (br s, 1H), 3.81 (s, 3H), 3.77 – 3.73 (m, 2H), 3.73 – 3.60 (m, 2H), 3.48 (br s, 2H), 3.29 – 3.08 (m, 2H); AMM (ESI)  $m/z$  calcd for  $\text{C}_{20}\text{H}_{24}\text{NO}_4^+ [\text{M}+\text{H}]^+$  342.1700, found 342.1704; IR (neat): 2855, 1635, 1514, 1429, 1114  $\text{cm}^{-1}$ .  $^1\text{H}$  NMR was taken at rt and shows a mixture of rotamers.

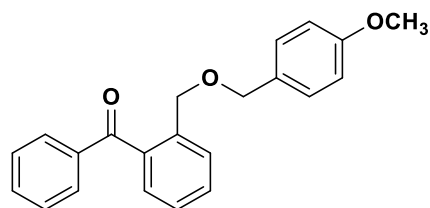

**2-(4-methoxybenzyloxymethyl)benzophenone (36)** was synthesized according to General Procedure E, using **35** (0.406 g, 1.19 mmol) in THF (11.7 mL), and 1.9 M phenyllithium in dibutyl ether (1.25 mL, 2.38 mmol), reacting for 2 h. The crude product was purified using flash column chromatography (90:10, hexanes:EtOAc), affording **36** as a yellow oil (0.330 g, 84%). <sup>1</sup>H NMR (600 MHz, CDCl<sub>3</sub>) δ 7.80 (d, *J* = 7.2 Hz, 2H), 7.59 – 7.55 (m, 2H), 7.48 (t, *J* = 7.3 Hz, 1H), 7.44 (t, *J* = 7.8 Hz, 2H), 7.38 – 7.32 (m, 2H), 7.08 (d, *J* = 8.6 Hz, 2H), 6.76 (d, *J* = 8.6 Hz, 2H), 4.62 (s, 2H), 4.33 (s, 2H), 3.77 (s, 3H); <sup>13</sup>C NMR (151 MHz, CDCl<sub>3</sub>) δ 198.1, 159.2, 138.2, 138.0, 137.7, 133.1, 130.5, 130.3, 130.1, 129.4, 128.8, 128.8, 128.5, 127.1, 113.7, 72.6, 69.8, 55.4; AMM (ESI) *m/z* calcd for C<sub>22</sub>H<sub>21</sub>O<sub>3</sub><sup>+</sup> [M+H]<sup>+</sup> 333.1485, found 333.1484; IR (neat): 2930, 2855, 1665, 1514, 1271 cm<sup>-1</sup>.

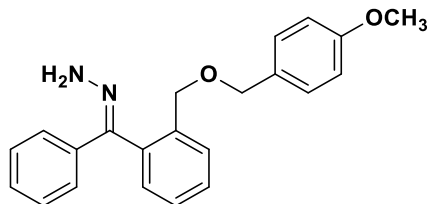

**((2-(((4-methoxy)benzyloxy)methyl)phenyl)(phenyl)methylene)hydrazine (10b)** was synthesized according to General Procedure O, using **36** (0.124 g, 0.372 mmol) in EtOH (3.7 mL), glacial acetic acid (0.03 mL, 0.5 mmol), and hydrazine (0.15 mL, 4.8 mmol), reacting for 3 h at 170 °C. The crude product was purified using flash column chromatography (70:30, hexanes:EtOAc), affording **10b** as a yellow oil (0.079 g, 61%). <sup>1</sup>H NMR (400 MHz, CDCl<sub>3</sub>) δ 7.66 (d, *J* = 7.1 Hz, 1H), 7.51 – 7.40 (m, 4H), 7.27 (dd, *J* = 5.1, 1.9 Hz, 3H), 7.19 – 7.11 (m, 3H), 6.81 (d, *J* = 8.6 Hz, 2H), 5.34 (s, 2H), 4.39 – 4.29 (m, 4H), 3.78 (s, 3H); AMM (ESI) *m/z* calcd for C<sub>22</sub>H<sub>23</sub>N<sub>2</sub>O<sub>2</sub><sup>+</sup> [M+H]<sup>+</sup> 347.1754, found 347.1750.

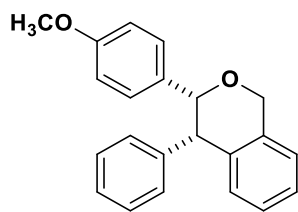

**(3*R*,4*S*)-3-(4-methoxy)phenyl-4-phenylisochromane (11b)** was synthesized according to General Procedure R, using MnO<sub>2</sub> (0.021 g, 0.24 mmol) and **10b** (0.027 g, 0.078 mmol) in CH<sub>2</sub>Cl<sub>2</sub> (5.2 mL), reacting for 20 min. Rh<sub>2</sub>(S-PTAD)<sub>4</sub> (0.001 g, 0.7 μmol) was added, reacting for 30 h. The crude product was purified using flash column chromatography (90:10, hexanes:EtOAc), affording **11b** as a white crystalline solid (0.016 g, >95:5 dr, >99.5:0.5 er, 69%). <sup>1</sup>H NMR (400 MHz, CDCl<sub>3</sub>) δ 7.26 – 7.21 (m, 1H), 7.19 – 7.11 (m, 2H), 7.08 – 6.98 (m, 4H), 6.85 (d, *J* = 8.5 Hz, 2H), 6.80 – 6.72 (m, 2H), 6.71 – 6.62 (m, 2H), 5.22 (d, *J* = 15.3 Hz, 1H), 5.10 (d, *J* = 15.3 Hz, 1H), 5.04 (d, *J* = 3.2 Hz, 1H), 4.07 (d, *J* = 2.8 Hz, 1H), 3.72 (s, 3H); <sup>13</sup>C NMR (101 MHz, CDCl<sub>3</sub>) δ 158.6, 141.0, 137.4, 134.4, 132.6, 130.4, 130.3, 127.4, 127.3, 126.9, 126.7, 126.2, 124.2, 113.2, 79.9, 69.3, 55.3, 50.5; AMM (CI-TOF) *m/z* calcd for C<sub>22</sub>H<sub>20</sub>O<sub>2</sub><sup>+</sup> [M]<sup>+</sup> 316.1463, found 316.1455; m.p. 167-168 °C; [α]<sub>D</sub><sup>21</sup> = 523.9 (c = 0.19, CHCl<sub>3</sub>).

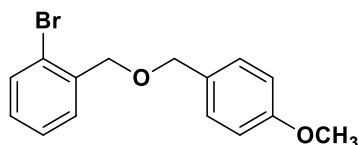



**1-bromo-2-(((4-methoxybenzyl)oxy)methyl)benzene (37)** was synthesized according to General Procedure C using 2-bromobenzyl bromide (3.000 g, 12.00 mmol) in THF (15 mL), *p*-methoxybenzyl alcohol (3.7 mL, 30 mmol) in THF (5 mL), NaH (1.440 g, 36.00 mmol) in THF (30 mL), and tetrabutylammonium iodide (0.621 g, 1.68 mmol). The crude product was quenched with sat. aq. NH<sub>4</sub>Cl (50 mL) and extracted with EtOAc (3 X 40 mL), the combined organic layers were washed with H<sub>2</sub>O (1 X 40 mL) and brine (1 X 40 mL). The crude product was purified by flash column chromatography (90:10, hexanes:EtOAc) affording **37** as a clear oil (3.424 g, 93%). <sup>1</sup>H NMR (400 MHz, CDCl<sub>3</sub>) δ 7.52 (t, *J* = 8.0 Hz, 2H), 7.36 – 7.28 (m, 3H), 7.14 (t, *J* = 7.7 Hz, 1H), 6.90 (d, *J* = 8.1 Hz, 2H), 4.60 (s, 2H), 4.57 (s, 2H), 3.81 (s, 3H). <sup>1</sup>H NMR data was consistent with literature values.<sup>11</sup>

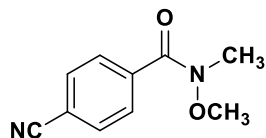

**4-cyano-*N*-methoxy-*N*-methylbenzamide (38)** was synthesized according to General Procedure H using 4-cyano-benzoic acid (1.863 g, 12.66 mmol) in CH<sub>2</sub>Cl<sub>2</sub> (25 mL), oxalyl chloride (12.66 mL, 25.32 mmol), DMF (1.3 mL, 16 mmol), Et<sub>3</sub>N (5.3 mL, 28 mmol), and *N,O*-dimethylhydroxylamine hydrochloride (1.852 g, 18.99 mmol) in CH<sub>2</sub>Cl<sub>2</sub> (164 mL). The crude product was extracted from NaHCO<sub>3</sub> (100 mL) with CH<sub>2</sub>Cl<sub>2</sub> (3 X 60 mL) and the combined organic layers were washed with NaHCO<sub>3</sub> (2 X 70 mL) and brine (1 X 70 mL). The crude product was purified by flash column chromatography (90:10, hexanes:EtOAc) affording **38** as a clear oil (1.858 g, 77%). <sup>1</sup>H NMR (600 MHz, CDCl<sub>3</sub>) δ 7.78 (d, *J* = 8.1 Hz, 2H), 7.71 (d, *J* = 8.1 Hz, 2H), 3.53 (s, 3H), 3.39 (s, 3H). <sup>1</sup>H NMR data was consistent with literature values.<sup>12</sup>

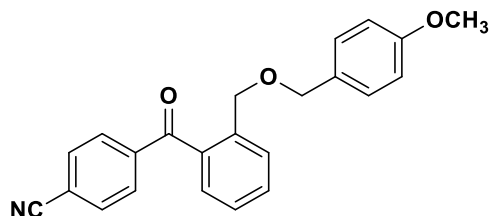

**4-(2-(((4-methoxybenzyl)oxy)methyl)benzoyl)benzonitrile (39)** was synthesized according to General Procedure J using **37** (0.538 g, 1.75 mmol), 2.5 M *n*-butyllithium in hexanes (0.85 mL, 2.1 mmol), **38** (0.500 g, 2.63 mmol), and THF (10.0 mL). The crude product was purified using flash column chromatography (80:20, hexanes:EtOAc), affording **39** as a white solid (0.455 g, 73%). <sup>1</sup>H NMR (600 MHz, CDCl<sub>3</sub>) δ 7.83 (d, *J* = 8.4 Hz, 2H), 7.70 (d, *J* = 8.3 Hz, 2H), 7.57 – 7.48 (m, 2H), 7.41 – 7.36 (m, 1H), 7.31 (d, *J* = 7.2 Hz, 1H), 7.03 (d, *J* = 8.6 Hz, 2H), 6.75 (d, *J* = 8.6 Hz, 2H), 4.60 (s, 2H), 4.30 (s, 2H), 3.79 (s, 3H); <sup>13</sup>C NMR (101 MHz, CDCl<sub>3</sub>) δ 196.4, 159.2, 140.9, 138.2, 136.9, 132.1, 130.9, 130.2, 129.6, 129.3, 128.8, 128.5, 127.3, 118.0, 116.0, 113.6, 72.6, 69.7, 55.2; AMM (ESI-TOF) *m/z* calcd for C<sub>23</sub>H<sub>19</sub>NaNO<sub>3</sub><sup>+</sup> [M+Na]<sup>+</sup> 380.1263, found 380.1262.

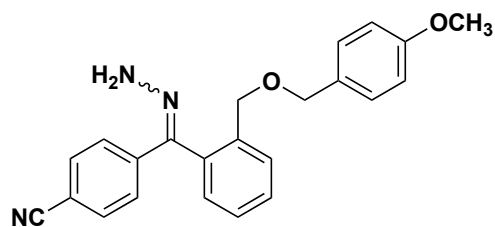

**(*E/Z*)-4-(hydrazineylidene(2-(((4-methoxybenzyl)oxy)methyl)phenyl)methyl)benzonitrile (10c)** was synthesized according to General Procedure P using **39** (0.357 g, 1.00 mmol), hydrazine (0.31 mL, 10 mmol), acetic acid (0.07 mL, 1 mmol), and EtOH (6.7 mL). The reaction was heated at 90 °C for 2 days. The crude product was purified using flash column chromatography (80:20, hexanes:EtOAc), affording **10c-1** as a colorless liquid (0.040 g, 11%), and **10c-2** as a colorless liquid (0.181 g, 49%)

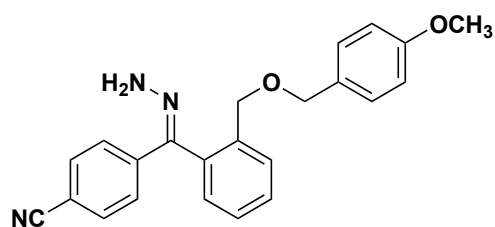

**(*E*)-4-(hydrazineylidene(2-(((4-methoxybenzyl)oxy)methyl)phenyl)methyl)benzonitrile (10c-1)**. <sup>1</sup>H NMR (400 MHz, CDCl<sub>3</sub>) δ 7.69 (d, *J* = 7.8 Hz, 2H), 7.57 – 7.50 (m, 1H), 7.47 (d, *J* = 7.9 Hz, 2H), 7.32 (t, *J* = 7.5 Hz, 1H), 7.26 – 7.19 (m, 3H), 7.07 (d, *J* = 7.6 Hz, 1H), 6.86 (d, *J* = 8.1 Hz, 2H), 5.55 (s, 2H), 4.57 (s, 2H), 4.41 (s, 2H), 3.80 (s, 3H); <sup>13</sup>C NMR (151 MHz, CDCl<sub>3</sub>) δ 159.2, 146.5, 138.3, 137.2, 137.2, 132.7, 130.3, 129.9, 129.7, 129.5, 129.0, 128.4, 127.4, 118.3, 113.7, 112.5, 72.1, 70.1, 55.3; AMM (ESI) *m/z* calcd for C<sub>23</sub>H<sub>22</sub>N<sub>3</sub>O<sub>2</sub><sup>+</sup> [M+H]<sup>+</sup> 372.1707, found 372.1703.

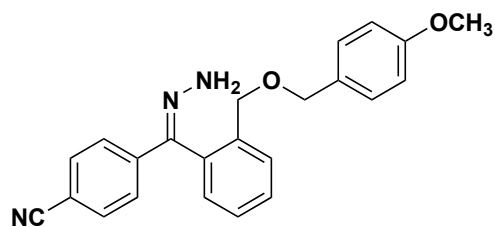

**(*Z*)-4-(hydrazineylidene(2-(((4-methoxybenzyl)oxy)methyl)phenyl)methyl)benzonitrile (10c-2)**. <sup>1</sup>H NMR (400 MHz, CDCl<sub>3</sub>) δ 7.66 (d, *J* = 7.3 Hz, 1H), 7.59 – 7.42 (m, 6H), 7.13 (d, *J* = 7.1 Hz, 1H), 7.08 (d, *J* = 8.1 Hz, 2H), 6.80 (d, *J* = 8.0 Hz, 2H), 5.58 (s, 2H), 4.35 – 4.30 (m, 2H), 4.29 – 4.23 (m, 2H), 3.79 (s, 3H); <sup>13</sup>C NMR (151 MHz, CDCl<sub>3</sub>) δ 159.2, 145.6, 142.3, 137.4, 132.0, 131.1, 129.9, 129.8, 129.7, 129.3, 129.2, 128.9, 126.2, 119.1, 113.7, 110.8, 72.7, 69.7, 55.3; AMM (ESI) *m/z* calcd for C<sub>23</sub>H<sub>22</sub>N<sub>3</sub>O<sub>2</sub><sup>+</sup> [M+H]<sup>+</sup> 372.1707, found 372.1701.

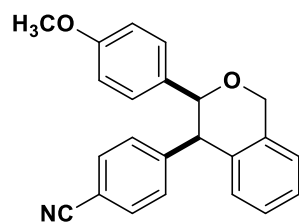

**4-((3*S*,4*R*)-3-(4-methoxyphenyl)isochroman-4-yl)benzointrile (11c)** was synthesized according to General Procedure R using hydrazone **10c-2** (0.025 g, 0.067 mmol), MnO<sub>2</sub> (0.047 g, 0.54 mmol), and Rh<sub>2</sub>(*R*-PTAD)<sub>4</sub> (0.001 g, 0.0007 mmol) in CH<sub>3</sub>CN (4.5 mL). The crude product was purified by flash column chromatography (83:17, hexanes:EtOAc), affording **11c** as white crystals (0.0223 g, 97%, >95:5 dr, 99:1 er). <sup>1</sup>H NMR (600 MHz, CDCl<sub>3</sub>) δ 7.33 (d, *J* = 8.2 Hz, 2H), 7.29 (t, *J* = 7.5 Hz, 1H), 7.21 – 7.17 (m, 2H), 6.99 (d, *J* = 7.8 Hz, 1H), 6.89 – 6.83 (m, 4H), 6.70 (d, *J* = 8.8 Hz, 2H), 5.23 (d, *J* = 15.4 Hz, 1H), 5.12 (d, *J* = 15.4 Hz, 1H), 5.08 (d, *J* = 3.4 Hz, 1H), 4.14 (d, *J* = 3.4 Hz, 1H), 3.75 (s, 3H); <sup>13</sup>C NMR (151 MHz, CDCl<sub>3</sub>) δ 158.6, 146.5, 135.7, 134.2, 131.7, 131.1, 130.8, 130.1, 127.2, 127.1, 126.8, 124.4, 119.1, 113.3, 109.9, 79.3, 69.1, 55.2, 50.5; AMM (ESI-TOF) *m/z* calcd for C<sub>23</sub>H<sub>19</sub>NaNO<sub>2</sub><sup>+</sup> [M+Na]<sup>+</sup> 364.1313, found 364.1318; m.p. 163-164 °C; [α]<sub>D</sub><sup>22</sup> = -487 (c = 0.11, CHCl<sub>3</sub>).

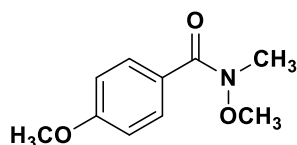

**N,4-dimethoxy-N-methylbenzamide (40)** was synthesized according to General Procedure H using 4-methoxybenzoic acid (3.041 g, 20.00 mmol) in CH<sub>2</sub>Cl<sub>2</sub> (40 mL), 2 M oxalyl chloride in CH<sub>2</sub>Cl<sub>2</sub> (20.0 mL, 40.0 mmol), DMF (2.0 mL, 26 mmol), Et<sub>3</sub>N (8.4 mL, 60 mmol), and *N,O*-dimethylhydroxylamine hydrochloride (2.926 g, 30.00 mmol) in CH<sub>2</sub>Cl<sub>2</sub> (200.0 mL). The crude product was extracted from NaHCO<sub>3</sub> (200 mL) with CH<sub>2</sub>Cl<sub>2</sub> (3 X 120 mL) and the combined organic layers were washed with NaHCO<sub>3</sub> (2 X 70 mL) and brine (1 X 70 mL). The crude product was purified by flash column chromatography (90:10, hexanes:EtOAc) affording **40** as a clear oil (3.360, 86%). <sup>1</sup>H NMR (400 MHz, CDCl<sub>3</sub>) δ 7.73 (d, *J* = 8.4 Hz, 2H), 6.90 (d, *J* = 8.5 Hz, 2H), 3.85 (s, 3H), 3.56 (s, 3H), 3.36 (s, 3H). <sup>1</sup>H NMR data was consistent with literature values.<sup>13</sup>

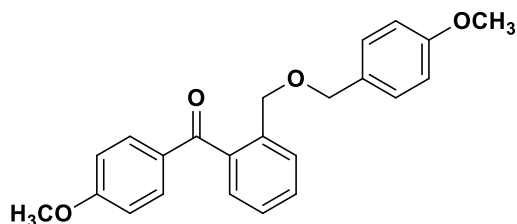

**(2-(((4-methoxybenzyl)oxy)methyl)phenyl)(4-methoxyphenyl)methanone (41)** was synthesized according to General Procedure J using **37** (1.536 g, 5.000 mmol), 2.5 M *n*-BuLi in hexanes (2.4 mL, 6.0 mmol), **40** (1.464 g, 7.500 mmol), and THF (30 mL). The crude product was purified using flash column chromatography (80:20, hexanes:EtOAc), affording **41** as a white solid (1.464 g, 84%). <sup>1</sup>H NMR (600 MHz, CDCl<sub>3</sub>) δ 7.79 (d, *J* = 8.2 Hz, 2H), 7.56 (d, *J* = 7.7 Hz, 1H), 7.49 – 7.43 (m, 1H), 7.36 – 7.32 (m, 2H), 7.08 (d, *J* = 8.1 Hz, 2H), 6.91 (d, *J* = 8.2 Hz, 2H), 6.76 (d, *J* = 8.1 Hz, 2H), 4.60 (s, 2H), 4.34 (s, 2H), 3.87 (s, 3H), 3.77 (s, 3H); <sup>13</sup>C NMR (151 MHz, CDCl<sub>3</sub>) δ 196.6, 163.6, 159.0, 138.5, 137.5, 132.5, 130.5, 130.1, 130.0, 129.5, 129.3, 128.6, 128.2, 126.9, 113.6, 72.4, 69.6, 55.5, 55.2; AMM (ESI) *m/z* calcd for C<sub>23</sub>H<sub>23</sub>O<sub>4</sub><sup>+</sup> [M+H]<sup>+</sup> 363.1591, found 363.1586.

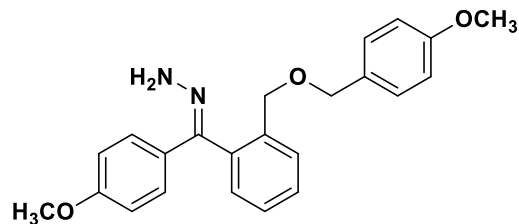

**((2-(((4-methoxybenzyl)oxy)methyl)phenyl)(4-methoxyphenyl)methylene)hydrazine (10d)** was synthesized according to General Procedure P using **41** (0.500 g, 1.38 mmol), hydrazine (0.45 mL, 14 mmol), acetic acid (0.14 mL, 2.8 mmol), and ethanol (9.2 mL). The reaction was heated at 90 °C for 4 days. The crude product was purified using flash column chromatography (80:20, hexanes:EtOAc), affording **10d** as a colorless liquid (0.421 g, 81%). <sup>1</sup>H NMR (400 MHz, CDCl<sub>3</sub>) δ 7.66 (d, *J* = 7.2 Hz, 1H), 7.45 (p, *J* = 7.5 Hz, 2H), 7.37 (d, *J* = 8.3 Hz, 2H), 7.15 (m, 3H), 6.88 – 6.73 (m, 4H) 5.21 (s, 2H), 4.50 – 4.27 (m, 4H), 3.79 (s, 3H), 3.78 (s, 3H); <sup>13</sup>C NMR (151 MHz, CDCl<sub>3</sub>) δ 159.8, 159.1, 148.5, 137.2, 132.4, 130.8, 130.2, 129.4, 129.2, 129.2, 128.8, 128.7, 127.3, 113.7, 113.6, 72.6, 69.7, 55.3, 55.2; AMM (ESI) *m/z* calcd for C<sub>23</sub>H<sub>25</sub>N<sub>2</sub>O<sub>3</sub><sup>+</sup> [M+H]<sup>+</sup> 377.1860, found 377.1855.

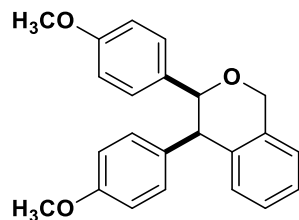

**(3*S*,4*R*)-3,4-bis(4-methoxyphenyl)isochromane (11d)** was synthesized according to General Procedure R using **10d** (0.025 g, 0.066 mmol), MnO<sub>2</sub> (0.046 g, 0.53 mmol), and Rh<sub>2</sub>(*R*-PTAD)<sub>4</sub> (0.001 g, 0.0007 mmol) in CH<sub>2</sub>Cl<sub>2</sub> (4.5 mL). The crude product was purified by flash column chromatography (83:17, hexanes:EtOAc), affording **11d** as white crystals (0.023 g, 98%, >95:5 dr, 99:1 er). <sup>1</sup>H NMR (600 MHz, CDCl<sub>3</sub>) δ 7.27 – 7.21 (m, 1H), 7.19 – 7.13 (m, 2H), 7.04 (d, *J* = 7.5 Hz, 1H), 6.85 (d, *J* = 8.3 Hz, 2H), 6.70 (d, *J* = 8.3 Hz, 2H), 6.67 (d, *J* = 8.3 Hz, 2H), 6.59 (d, *J* = 8.3 Hz, 2H), 5.21 (d, *J* = 15.3 Hz, 1H), 5.10 (d, *J* = 15.2 Hz, 1H), 5.01 (d, *J* = 3.3 Hz, 1H), 4.03 (d, *J* = 3.2 Hz, 1H), 3.75 (s, 3H), 3.70 (s, 3H); <sup>13</sup>C NMR (151 MHz, CDCl<sub>3</sub>) δ 158.4, 157.8, 137.6, 134.2, 133.1, 132.6, 131.0, 130.2, 127.2, 126.8, 126.5, 124.0, 113.0, 112.7, 79.8, 69.1, 55.2, 55.1, 49.5; m.p. 159-160 °C; AMM (ESI) *m/z* calcd for [M+Na]<sup>+</sup> C<sub>23</sub>H<sub>22</sub>NaO<sub>3</sub><sup>+</sup> 369.1467, found 369.1464; [α]<sub>D</sub><sup>22</sup> = –352 (c = 0.12, CHCl<sub>3</sub>).

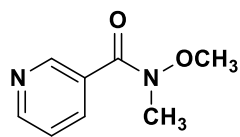

***N*-methoxy-*N*-methyl-3-nicotinamide (42)** was synthesized by preparing a suspension of *N*-methoxy-*N*-methylamine•HCl (1.317 g, 13.50 mmol, 1.2 equiv.) in CH<sub>2</sub>Cl<sub>2</sub> (45.0 mL), following a modified literature procedure.<sup>13</sup> This suspension was cooled to 0 °C and triethylamine (6.25 mL, 44.8 mmol, 3.9 equiv) was added slowly over 20 minutes, the resulting solution was cooled to 0 °C. To the solution was added nicotinoyl chloride•HCl (2.032 g, 11.41 mmol, 1.0 equiv) and the mixture was allowed to warm to rt and stirred for 23 h. The reaction mixture was quenched with sat. aq. NaHCO<sub>3</sub> (10 mL), and the organic layer was separated. The aqueous layer was then neutralized with 1 M HCl

and extracted with CH<sub>2</sub>Cl<sub>2</sub> (3 X 50 mL); the combined organic layers were washed with brine (2 X 100 mL) and dried over Na<sub>2</sub>SO<sub>4</sub>. The resulting solution was concentrated *in vacuo* and the crude product was purified using flash column chromatography (95:5, CH<sub>2</sub>Cl<sub>2</sub>:CH<sub>3</sub>OH), affording **42** as a yellow oil (1.511 g, 80%). <sup>1</sup>H NMR (600 MHz, CDCl<sub>3</sub>) δ 8.96 (s, 1H), 8.69 (d, *J* = 4.7 Hz, 1H), 8.03 (d, *J* = 7.8 Hz, 1H), 7.37 (dd, *J* = 7.8, 4.9 Hz, 1H), 3.56 (s, 3H), 3.40 (s, 3H); <sup>13</sup>C NMR (151 MHz, CDCl<sub>3</sub>) δ 167.4, 151.4, 149.3, 136.1, 129.8, 123.0, 61.3, 33.1. <sup>1</sup>H NMR and <sup>13</sup>C NMR data were consistent with literature values.<sup>13</sup>

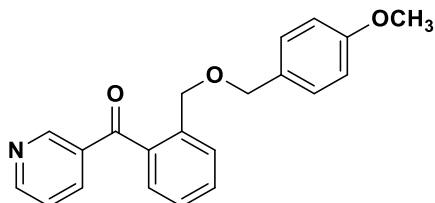

**(2-(((4-methoxybenzyl)oxy)methyl)phenyl)(pyridin-3-yl)methanone (43)** was synthesized according to General Procedure J, using **37** (1.008 g, 3.282 mmol) in THF (12.2 mL), 2.13 M *n*-butyllithium in hexanes (2.0 mL, 4.3 mmol), and **42** (0.649 g, 3.91 mmol) in THF (4.9 mL), reacting for 16 h. The crude product was purified using flash column chromatography (60:40, Et<sub>2</sub>O:hexanes), affording **43** as a white oil (0.974 g, 89%). <sup>1</sup>H NMR (600 MHz, CDCl<sub>3</sub>) δ 8.94 (s, 1H), 8.77 (d, *J* = 4.7 Hz, 1H), 8.07 (d, *J* = 7.9 Hz, 1H), 7.57 (d, *J* = 7.6 Hz, 1H), 7.52 (t, *J* = 7.2 Hz, 1H), 7.42 – 7.33 (m, 3H), 7.08 (d, *J* = 8.4 Hz, 2H), 6.77 (d, *J* = 8.4 Hz, 2H), 4.64 (s, 2H), 4.33 (s, 2H), 3.77 (s, 3H); <sup>13</sup>C NMR (151 MHz, CDCl<sub>3</sub>) δ 196.6, 159.2, 153.3, 151.5, 138.5, 137.2, 137.0, 133.2, 131.1, 129.9, 129.5, 129.0, 128.9, 127.4, 123.4, 113.8, 72.7, 69.8, 55.4; AMM (ESI) *m/z* calcd for C<sub>21</sub>H<sub>20</sub>NO<sub>3</sub><sup>+</sup> [M+H]<sup>+</sup> 334.1438, found 334.1443.

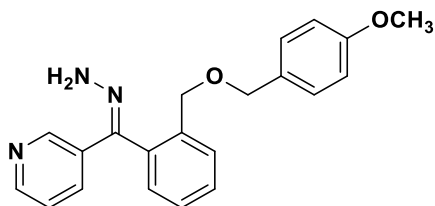

**((2-(((4-methoxybenzyl)oxy)methyl)phenyl)(pyridin-3-yl)methylene)hydrazine (10e)** was synthesized according to General Procedure O, using **43** (0.321 g, 0.963 mmol) in anhydrous EtOH (9.6 mL), hydrazine (0.17 mL, 5.4 mmol), and glacial acetic acid (0.06 mL, 1 mmol), reacting for 4.5 h at 155 °C. The crude product was purified using flash column chromatography (40:60, hexanes:EtOAc), affording **10e** as a dense yellow oil (0.204 g, 61%). <sup>1</sup>H NMR (600 MHz, CDCl<sub>3</sub>) δ 8.63 (s, 1H), 8.49 (d, *J* = 4.7 Hz, 1H), 7.74 (d, *J* = 8.1 Hz, 1H), 7.66 (d, *J* = 7.5 Hz, 1H), 7.53 – 7.44 (m, 2H), 7.19 (dd, *J* = 8.0, 4.8 Hz, 1H), 7.17 (d, *J* = 7.2 Hz, 1H), 7.14 (d, *J* = 8.5 Hz, 2H), 6.82 (d, *J* = 8.6 Hz, 2H), 5.48 (s, 2H), 4.40 – 4.35 (m, 2H), 4.35 – 4.29 (m, 2H), 3.79 (s, 3H); <sup>13</sup>C NMR (151 MHz, CDCl<sub>3</sub>) δ 159.3, 149.0, 147.7, 145.5, 137.4, 133.8, 133.0, 131.2, 130.0, 129.8, 129.5, 129.2, 129.0, 123.2, 113.9, 72.8, 69.9, 55.4, 14.3.

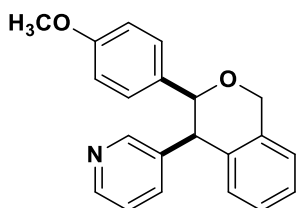

**(3*S*,4*S*)-3-(4-methoxy)phenyl-4-(pyridin-3-yl)lisochromane (11e)** was synthesized according to General Procedure R, using MnO<sub>2</sub> (0.050 g, 0.58 mmol), **10e** (0.025 g, 0.072 mmol) in CH<sub>3</sub>CN (4.8 mL), reacting for 1 h. Rh<sub>2</sub>(*R*-PTAD)<sub>4</sub> (0.001 g, 0.8 μmol) was added, reacting for 38 h. The crude product was purified using flash column chromatography (40:60, hexanes:EtOAc), affording **11e** as a white solid (0.019 g, >95:5 dr, 94:6 er, 82%). <sup>1</sup>H NMR (600 MHz, CDCl<sub>3</sub>) δ 8.29 (d, *J* = 4.5 Hz, 1H), 7.95 (s, 1H), 7.30 – 7.25 (m, 1H), 7.21 – 7.16 (m, 2H), 7.13 (d, *J* = 7.7 Hz, 1H), 7.06 – 6.96 (m, 2H), 6.87 (d, *J* = 8.4 Hz, 2H), 6.70 (d, *J* = 8.5 Hz, 2H), 5.23 (d, *J* = 15.3 Hz, 1H), 5.12 (d, *J* = 15.3 Hz, 1H), 5.09 (d, *J* = 2.9 Hz, 1H), 4.10 (d, *J* = 2.3 Hz, 1H), 3.73 (s, 3H); <sup>13</sup>C NMR (151 MHz, CD<sub>2</sub>Cl<sub>2</sub>) δ 158.5, 150.7, 147.3, 137.1, 136.7, 136.1, 134.4, 132.1, 129.9, 126.9, 126.9, 126.8, 124.2, 122.4, 113.0, 78.9, 69.0, 55.0, 47.7; AMM (CI-TOF) *m/z* calcd C<sub>21</sub>H<sub>20</sub>NO<sub>2</sub><sup>+</sup> [M+H]<sup>+</sup> 318.1494, found 318.1490; m.p. 181-183 °C; [α]<sub>D</sub><sup>20</sup> = -217.1 (c = 0.57, CHCl<sub>3</sub>).

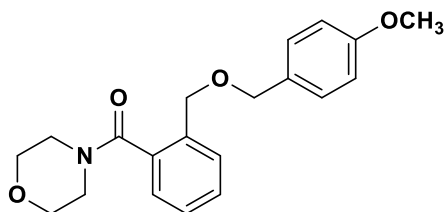

**(2-(((4-methoxybenzyl)oxy)methyl)phenyl)(morpholino)methanone (44)** was synthesized using General Procedure D using ether **34** (1.000 g, 3.255 mmol), morpholine (0.43 mL, 4.9 mmol), palladium (II) acetate (0.018 g, 0.081 mmol), Xantphos (0.094 g, 0.16 mmol), potassium phosphate tribasic (2.073 g, 9.765 mmol), CO (1 balloon), in toluene (6.5 mL). The crude product was purified using flash column chromatography (40:60, hexanes:EtOAc) affording **44** as a pale yellow oil (0.800 g, 84%). <sup>1</sup>H NMR (400 MHz, CDCl<sub>3</sub>) δ 7.44 (d, *J* = 7.6 Hz, 1H), 7.40 – 7.26 (m, 4H), 7.18 (d, *J* = 7.1 Hz, 1H), 6.94 – 6.85 (m, 2H), 4.51 (s, 2H), 3.81 (s, 3H), 3.78 – 3.61 (m, 4H), 3.55 – 3.41 (m, 2H), 3.19 (s, 2H), 1.62 (s, 2H). <sup>1</sup>H NMR was taken at rt and shows a mixture of rotamers.

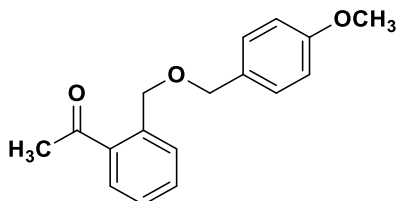

**1-(2-(((4-methoxybenzyl)oxy)methyl)phenyl)ethan-1-one (45)** was synthesized according to General Procedure E using morpholine amide **44** (0.552 g, 1.62 mmol) and methyllithium (1.52 M in diethyl ether, 1.28 mL, 1.94 mmol) in THF (9.5 mL). The crude product was purified using flash column chromatography (80:20 hexanes: EtOAc) affording **45** as a yellow oil (0.267 g, 61%). <sup>1</sup>H NMR (400 MHz, CDCl<sub>3</sub>) δ 7.72 (d, *J* = 7.9 Hz, 2H), 7.50 (t, *J* = 7.6 Hz, 1H), 7.39 – 7.28 (m, 3H), 6.92 – 6.85 (m, 2H), 4.85 (s, 2H), 4.55 (s, 2H), 3.80 (s, 3H), 2.57 (s, 3H); <sup>13</sup>C NMR (101 MHz, CDCl<sub>3</sub>) δ 201.7, 159.3, 139.7, 136.6, 132.0, 130.6, 129.5, 129.4, 128.1, 127.0, 113.9, 72.8, 70.4, 55.4, 29.3; AMM (ESI-TOF) *m/z* calcd for C<sub>17</sub>H<sub>18</sub>NaO<sub>3</sub><sup>+</sup> [M+Na]<sup>+</sup> 293.1157, found 293.1157.

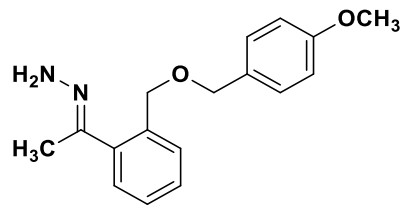

**(1-(2-(((4-methoxybenzyl)oxy)methyl)phenyl)ethylidene)hydrazine (10f)** was synthesized according to General Procedure O using ketone **45** (0.267 g, 0.988 mmol), hydrazine (0.31 mL, 9.8 mmol), acetic acid (0.07 mL, 1 mmol) and ethanol (6.6 mL). The crude product was purified using flash column chromatography (100:0 to 60:40 hexanes:EtOAc) affording **10f** as a yellow oil (0.0447 g, 16%). <sup>1</sup>H NMR (400 MHz, CDCl<sub>3</sub>) δ 7.60 – 7.50 (m, 1H), 7.42 – 7.33 (m, 2H), 7.32 – 7.23 (m, 2H), 7.13 – 7.03 (m, 1H), 6.88 (d, *J* = 8.0 Hz, 2H), 4.88 (s, 2H), 4.50 (s, 2H), 4.42 (s, 2H), 3.80 (s, 3H), 2.14 (s, 3H).

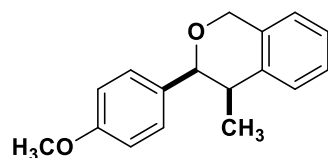

**(3*S*,4*R*)-3-(4-methoxyphenyl)-4-methylisochromane (11f)** was synthesized according to General Procedure R using **10f** (0.022 g, 0.077 mmol), MnO<sub>2</sub> (0.054 g, 0.62 mmol), Rh<sub>2</sub>(*R*-PTAD)<sub>4</sub> (0.001 g, 0.0008 mmol) and CH<sub>2</sub>Cl<sub>2</sub> (5 mL). The crude product was purified using flash column chromatography (90:10 to 80:20 hexanes:EtOAc) affording **11f** as a clear oil (0.011 g, 56%, >95:5 dr, 60:40 er). <sup>1</sup>H NMR (400 MHz, CDCl<sub>3</sub>) δ 7.29 (d, *J* = 8.2 Hz, 2H), 7.23 – 7.14 (m, 3H), 7.08 – 7.02 (m, 1H), 6.92 (d, *J* = 8.3 Hz, 2H), 5.05 (d, *J* = 15.1 Hz, 1H), 4.98 (d, *J* = 15.2 Hz, 1H), 4.86 (d, *J* = 2.8 Hz, 1H), 3.82 (s, 3H), 3.03 – 2.91 (m, 1H), 0.97 (d, *J* = 7.0 Hz, 3H); <sup>13</sup>C NMR (101 MHz, CDCl<sub>3</sub>) δ 158.6, 140.5, 134.0, 133.3, 129.0, 126.9, 126.6, 126.3, 124.2, 113.7, 78.4, 69.0, 55.4, 38.1, 17.2; AMM (CI-TOF) *m/z* calcd for C<sub>17</sub>H<sub>18</sub>O<sub>2</sub><sup>+</sup> [M]<sup>+</sup> 254.1307, found 253.1304; [α]<sub>D</sub><sup>22</sup> = -3.4 (c = 0.07, CHCl<sub>3</sub>).

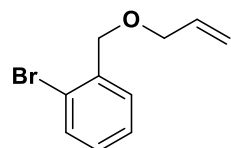

**2-((allyloxy)methyl)bromobenzene (46)** was synthesized according to General Procedure A, using NaH (1.216 g, 30.31 mmol) in THF (37.9 mL), 2-bromobenzyl bromide (3.003 g, 12.02 mmol) in THF (15.0 mL), and allyl alcohol (1.03 mL, 14.7 mmol), reacting for 47 h at 60 °C. The crude product was purified using flash column chromatography (95:5, hexanes:EtOAc), affording **46** as a clear oil (2.251 g, 82%). <sup>1</sup>H NMR (600 MHz, CDCl<sub>3</sub>) δ 7.53 (d, *J* = 7.9 Hz, 1H), 7.50 (d, *J* = 7.3 Hz, 1H), 7.31 (t, *J* = 7.5 Hz, 1H), 7.14 (t, *J* = 7.6 Hz, 1H), 5.98 (ddt, *J* = 16.3, 10.6, 5.5 Hz, 1H), 5.39 – 5.31 (m, 1H), 5.23 (d, *J* = 10.4 Hz, 1H), 4.58 (s, 2H), 4.11 (d, *J* = 5.5 Hz, 2H); <sup>13</sup>C NMR (151 MHz, CDCl<sub>3</sub>) δ 137.8, 134.6, 132.6, 129.0, 128.9, 127.5, 122.7, 117.4, 71.8, 71.5; AMM (CI-TOF) *m/z* calcd for C<sub>10</sub>H<sub>11</sub>BrO<sup>+</sup> [M]<sup>+</sup> 225.9993, found 225.9993.

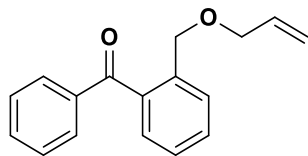

**2-((allyloxy)methyl)benzophenone (47)** was synthesized according to General Procedure J, using **46** (0.501 g, 2.21 mmol) in THF (8.2 mL), 2.13 M *n*-butyllithium in hexanes (1.34 mL, 2.86 mmol), and **31** (0.436 g, 2.64 mmol) in THF (3.3 mL), were combined and allowed to react for 20 h. The crude product was purified using flash column chromatography (90:10, hexanes:EtOAc), affording **47** as a clear oil (0.482 g, 87%). <sup>1</sup>H NMR (600 MHz, CDCl<sub>3</sub>) δ 7.80 (d, *J* = 7.3 Hz, 2H), 7.57 (t, *J* = 6.6 Hz, 2H), 7.49 (t, *J* = 7.3 Hz, 1H), 7.45 (t, *J* = 7.7 Hz, 2H), 7.38 – 7.33 (m, 2H), 5.74 (ddt, *J* = 16.1, 10.8, 5.4 Hz, 1H), 5.18 – 5.11 (m, 1H), 5.10 – 5.03 (m, 1H), 4.60 (s, 2H), 3.87 (d, *J* = 5.5 Hz, 2H); <sup>13</sup>C NMR (151 MHz, CDCl<sub>3</sub>) δ 198.0, 138.2, 137.8, 137.7, 134.4, 133.1, 130.5, 130.2, 128.9, 128.5, 128.4, 127.0, 117.1, 71.7, 69.8; AMM (ESI) *m/z* calcd for C<sub>17</sub>H<sub>17</sub>O<sub>2</sub><sup>+</sup> [M+H]<sup>+</sup> 253.1223, found 252.1226.

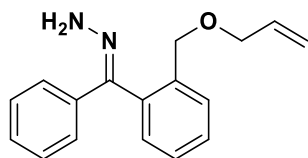

**((2-((allyloxy)methyl)phenyl)(phenyl)methylene)hydrazine (12a)** was synthesized according to General Procedure P in a sealed microwave vial, using ketone **47** (0.251 g, 0.996 mmol) in anhydrous EtOH (10.0 mL), hydrazine (0.19 mL, 6.0 mmol), and glacial acetic acid (0.07 mL, 1 mmol) reacting for 5 d at 90 °C. The crude product was purified using flash column chromatography (80:20, hexanes:EtOAc), affording **12a** as a yellow oil (0.132 g, 50%). <sup>1</sup>H NMR (400 MHz, CDCl<sub>3</sub>) δ 7.67 (d, *J* = 7.4 Hz, 1H), 7.53 – 7.40 (m, 4H), 7.32 – 7.23 (m, 3H), 7.17 (d, *J* = 7.2 Hz, 1H), 5.82 (ddt, *J* = 16.7, 10.6, 5.5 Hz, 1H), 5.36 (s, 2H), 5.19 (d, *J* = 17.3 Hz, 1H), 5.11 (d, *J* = 10.4 Hz, 1H), 4.39 – 4.25 (m, 2H), 3.92 (d, *J* = 5.5 Hz, 2H).

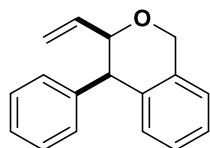

**(3R,4R)-4-phenyl-3-vinylisochromane (13a)** was synthesized according to General Procedure R, using MnO<sub>2</sub> (0.065 g, 0.75 mmol) and **12a** (0.026 g, 0.099 mmol) in CH<sub>3</sub>CN (6.6 mL), reacting for 0.25 h. Rh<sub>2</sub>(*R*-PTAD)<sub>4</sub> (0.002 g, 1 μmol) was added, reacting for 3 h. The crude product was purified using flash column chromatography (90:10, hexanes:EtOAc), affording **13a** as a white crystalline solid (0.017 g, >95:5 dr, 97:3 er, 73%). <sup>1</sup>H NMR (400 MHz, CDCl<sub>3</sub>) δ 7.27 – 7.16 (m, 4H), 7.16 – 7.07 (m, 4H), 7.02 (d, *J* = 7.5 Hz, 1H), 5.57 – 5.44 (m, 1H), 5.24 (d, *J* = 17.3 Hz, 1H), 5.13 – 5.03 (m, 2H), 4.99 (d, *J* = 15.2 Hz, 1H), 4.50 – 4.40 (m, 1H), 3.96 – 3.89 (m, 1H); <sup>13</sup>C NMR (101 MHz, CDCl<sub>3</sub>) δ 141.7, 137.1, 137.0, 134.1, 130.3, 130.1, 128.0, 127.0, 126.6, 126.5, 124.2, 116.4, 79.3, 68.5, 48.7; AMM (CI-TOF) *m/z* calcd for C<sub>17</sub>H<sub>20</sub>NO<sup>+</sup> [M+NH<sub>4</sub>]<sup>+</sup> 254.1545, found 254.1554; m.p. 83-86 °C; [α]<sub>D</sub><sup>22</sup> = -207.6 (c = 0.26, CHCl<sub>3</sub>).



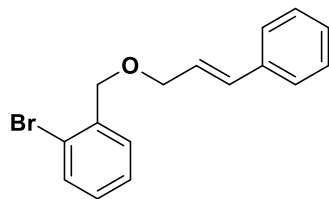

**2-((cinnamyloxy)methyl)bromobenzene (48)** was synthesized according to General Procedure A, using NaH (0.961 g, 24.0 mmol) in THF (30 mL), 2-bromobenzyl bromide (2.011 g, 8.047 mmol) in THF (10.1 mL), *trans*-cinnamyl alcohol (1.623 g, 12.09 mmol), reacting for 20 h. The crude product was purified using flash column chromatography (95:5, hexanes:EtOAc), affording **48** as a clear oil (1.793 g, 74%). <sup>1</sup>H NMR (600 MHz, CDCl<sub>3</sub>) δ 7.57 – 7.50 (m, 2H), 7.41 (d, *J* = 7.4 Hz, 2H), 7.32 (t, *J* = 7.6 Hz, 3H), 7.25 (t, *J* = 7.3 Hz, 1H), 7.15 (t, *J* = 8.2 Hz, 1H), 6.67 (d, *J* = 15.9 Hz, 1H), 6.36 (dt, *J* = 15.9, 6.0 Hz, 1H), 4.64 (s, 2H), 4.28 (d, *J* = 6.0 Hz, 2H); <sup>13</sup>C NMR (101 MHz, CDCl<sub>3</sub>) δ 137.8, 136.8, 132.8, 132.7, 129.3, 129.1, 128.7, 127.9, 127.6, 126.7, 126.0, 122.9, 71.6, 71.5; AMM (CI-TOF) *m/z* calcd for C<sub>16</sub>H<sub>15</sub>BrO<sup>+</sup> [M]<sup>+</sup> 302.0306, found 302.0291.

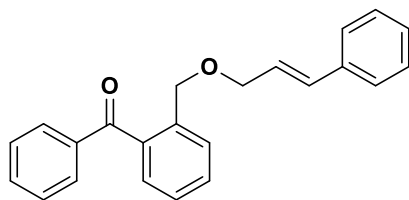

**2-((cinnamyloxy)methyl)benzophenone (49)** was synthesized according to General Procedure J, using **48** (1.005 g, 3.30 mmol) in THF (12.2 mL), 2.13 M *n*-butyllithium in hexanes (2.01 mL, 4.29 mmol), and **31** (0.654 g, 3.96 mmol) in THF (5.0 mL), reacting for 36 h. The crude product was purified using flash column chromatography (80:20, hexanes:EtOAc), affording **49** as a yellow oil (0.530 g, 49%). <sup>1</sup>H NMR (400 MHz, CDCl<sub>3</sub>) δ 7.81 (d, *J* = 7.7 Hz, 2H), 7.57 (t, *J* = 7.7 Hz, 2H), 7.53 – 7.46 (m, 1H), 7.43 (t, *J* = 7.5 Hz, 2H), 7.40 – 7.31 (m, 2H), 7.32 – 7.17 (m, 5H), 6.44 (d, *J* = 15.9 Hz, 1H), 6.08 (dt, *J* = 15.8, 5.9 Hz, 1H), 4.65 (s, 2H), 4.03 (d, *J* = 5.9 Hz, 2H); <sup>13</sup>C NMR (151 MHz, CDCl<sub>3</sub>) δ 198.1, 138.1, 138.0, 137.7, 136.8, 133.2, 132.4, 130.5, 130.2, 128.8, 128.7, 128.6, 128.5, 127.7, 127.2, 126.6, 125.7, 71.4, 70.0; AMM (ESI) *m/z* calcd for C<sub>23</sub>H<sub>21</sub>O<sub>2</sub><sup>+</sup> [M+H]<sup>+</sup> 329.1536, found 329.1533. NOTE: compound was found to degrade over several days and should be used immediately.

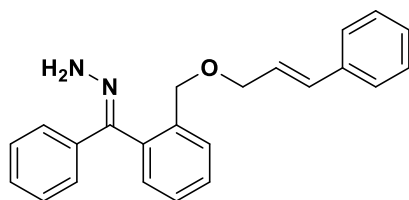

**((2-((cinnamyloxy)methyl)phenyl)(phenyl)methylene)hydrazine (12b)** was synthesized according to General Procedure P using a sealed microwave vial, using **49** (0.309 g, 0.939 mmol) in anhydrous EtOH (9.4 mL), hydrazine (0.19 mL, 6.0 mmol), and glacial acetic acid (0.07 mL, 1 mmol), reacting for 3 d at 100 °C. The crude product was purified using flash column chromatography (80:20, hexanes:EtOAc), affording **12b** as a yellow amorphous solid (0.224 g, 70%). <sup>1</sup>H NMR (400 MHz, CDCl<sub>3</sub>) δ 7.69 (d, *J* = 7.3 Hz, 1H), 7.56 – 7.39 (m, 4H), 7.34 – 7.22 (m, 8H), 7.18 (d, *J* =

7.2 Hz, 1H), 6.50 (d,  $J = 16.0$  Hz, 1H), 6.16 (dt,  $J = 15.8, 6.0$  Hz, 1H), 5.37 (s, 2H), 4.46 – 4.27 (m, 2H), 4.07 (d,  $J = 5.9$  Hz, 2H); AMM (ESI)  $m/z$  calcd for  $C_{24}H_{25}N_2O^+$   $[M+H]^+$  343.1805, found 343.1814.

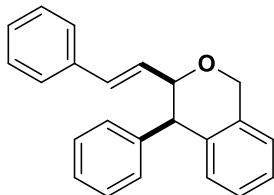

**(3R,4R)-4-phenyl-3-((E)-styryl)isochromane (13b)** was synthesized according to General Procedure R, using  $MnO_2$  (0.051 g, 0.58 mmol) and **12b** (0.022 g, 0.065 mmol) in  $CH_3CN$  (4.3 mL), reacting for 3 h.  $Rh_2(R-PTAD)_4$  (0.001 g, 0.7  $\mu$ mol) was added, reacting for 14 h. The crude product was purified using flash column chromatography (90:10, hexanes:EtOAc), affording **13b** as a white crystalline solid (0.019 g, >95:5 dr, 98:2 er, 95%). **13b** was crystallized out of hexanes:*i*-PrOH (90:10) with a small amount of  $CH_2Cl_2$  to dissolve fully followed by slow evaporation over 24 h.  $^1H$  NMR (400 MHz,  $CDCl_3$ )  $\delta$  7.28 – 7.16 (m, 9H), 7.16 – 7.10 (m, 4H), 7.04 (d,  $J = 7.5$  Hz, 1H), 6.57 (d,  $J = 16.0$  Hz, 1H), 5.81 (dd,  $J = 15.9, 6.9$  Hz, 1H), 5.13 (d,  $J = 15.2$  Hz, 1H), 5.04 (d,  $J = 15.2$  Hz, 1H), 4.61 (dd,  $J = 6.4, 2.9$  Hz, 1H), 4.02 (d,  $J = 2.6$  Hz, 1H).;  $^{13}C$  NMR (101 MHz,  $CDCl_3$ )  $\delta$  141.6, 137.0, 137.0, 134.2, 131.6, 130.3, 130.1, 128.6, 128.6, 128.0, 127.7, 127.0, 126.7, 126.7, 126.6, 124.2, 79.1, 68.6, 49.2; AMM (CI-TOF)  $m/z$  calcd for  $C_{23}H_{20}O^+$   $[M]^+$  312.1514, found 312.1526; m.p. 106-107  $^\circ C$ ;  $[\alpha]_D^{21} = -431.0$  ( $c = 0.22, CHCl_3$ ).

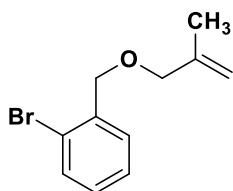

**2-(((2-methylallyl)oxy)methyl)bromobenzene (50)** was synthesized according to General Procedure A, using NaH (0.960 g, 24.0 mmol) in THF (30 mL), 2-bromobenzyl bromide (2.008 g, 8.033 mmol) in THF (10.0 mL), and 2-methylallyl alcohol (1.01 mL, 12.0 mmol), reacting for 48 h at 60  $^\circ C$ . The crude product was purified using flash column chromatography (80:20, hexanes: $CH_2Cl_2$ ), affording **50** as a clear oil (1.438 g, 75%).  $^1H$  NMR (600 MHz,  $CDCl_3$ )  $\delta$  7.53 (d,  $J = 8.0$  Hz, 1H), 7.51 (d,  $J = 7.8$  Hz, 1H), 7.32 (t,  $J = 7.5$  Hz, 1H), 7.14 (t,  $J = 7.6$  Hz, 1H), 5.04 (s, 1H), 4.95 (s, 1H), 4.56 (s, 2H), 4.02 (s, 2H), 1.79 (s, 3H);  $^{13}C$  NMR (151 MHz,  $CDCl_3$ )  $\delta$  142.2, 138.0, 132.6, 129.1, 128.9, 127.5, 122.7, 112.6, 74.8, 71.3, 19.7; AMM (CI-TOF)  $m/z$  calcd for  $C_{11}H_{14}BrO^+$   $[M+H]^+$  241.0228, found 241.0224.

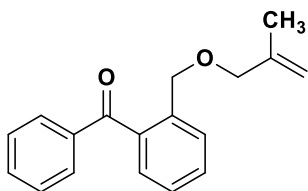

**2-(((2-methylallyl)oxy)methyl)benzophenone (51)** was synthesized according to General Procedure J, using **50** (1.913 g, 4.200 mmol) in THF (15.6 mL), 2.13 M *n*-butyllithium in hexanes (2.53 mL, 5.33 mmol), and **31** (0.822 g, 4.98 mmol) in THF (6.2 mL) were combined and allowed to react for 18 h. The crude product was purified using flash column chromatography (95:5, hexanes:EtOAc), affording **51** as a clear oil (0.844 g, 75%).  $^1H$  NMR (600 MHz,

CDCl<sub>3</sub>)  $\delta$  7.80 (d,  $J$  = 7.5 Hz, 2H), 7.61 – 7.54 (m, 2H), 7.49 (t,  $J$  = 7.9 Hz, 1H), 7.45 (t,  $J$  = 7.7 Hz, 2H), 7.39 – 7.32 (m, 2H), 4.84 (s, 1H), 4.80 (s, 1H), 4.59 (s, 2H), 3.79 (s, 2H), 1.61 (s, 3H); <sup>13</sup>C NMR (151 MHz, CDCl<sub>3</sub>)  $\delta$  198.0, 142.0, 138.3, 137.8, 137.7, 133.1, 130.6, 130.2, 128.9, 128.5, 128.4, 127.0, 112.3, 74.8, 69.7, 19.5; AMM (ESI)  $m/z$  calcd for C<sub>18</sub>H<sub>19</sub>O<sub>2</sub><sup>+</sup> [M+H]<sup>+</sup> 267.1380, found 267.1380.

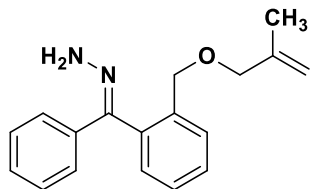

**((2-(((2-methyl)oxy)methyl)phenyl)(phenyl)methylene)hydrazine (12c)** was synthesized according to General Procedure P in a sealed microwave vial, using **51** (0.308 g, 1.16 mmol) in anhydrous EtOH (11.6 mL), hydrazine (0.21 mL, 6.8 mmol), and glacial acetic acid (0.08 mL, 1 mmol), reacting for 3.5 d at 100 °C. The crude product was purified using flash column chromatography (80:20, hexanes:EtOAc), affording **12c** as a yellow oil (0.251 g, 77%). <sup>1</sup>H NMR (400 MHz, CDCl<sub>3</sub>)  $\delta$  7.68 (d,  $J$  = 7.4 Hz, 1H), 7.53 – 7.40 (m, 4H), 7.32 – 7.23 (m, 3H), 7.16 (d,  $J$  = 7.2 Hz, 1H), 5.36 (s, 2H), 4.89 (s, 1H), 4.83 (s, 1H), 4.32 (d,  $J$  = 12.2 Hz, 1H), 4.26 (d,  $J$  = 12.2 Hz, 1H), 3.83 (s, 2H), 1.67 (s, 3H); AMM (ESI)  $m/z$  calcd for C<sub>18</sub>H<sub>21</sub>N<sub>2</sub>O<sup>+</sup> [M+H]<sup>+</sup> 281.1648, found 281.1646.

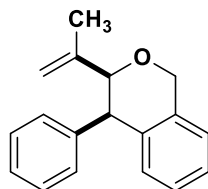

**(3*S*,4*R*)-4-phenyl-3-((1-methyl)vinyl)isochromane (13c)** was synthesized according to General Procedure R, using MnO<sub>2</sub> (0.064 g, 0.71 mmol) and **12c** (0.022 g, 0.078 mmol) in CH<sub>3</sub>CN (5.2 mL), reacting for 1.5 h. Rh<sub>2</sub>(*R*-PTAD)<sub>4</sub> (0.001 g, 0.9  $\mu$ mol) was added, reacting for 16 h. The crude product was purified using flash column chromatography (90:10, hexanes:EtOAc), affording **13c** as a white solid (0.018 g, >95:5 dr, 95:5 er, 90%). <sup>1</sup>H NMR (400 MHz, CDCl<sub>3</sub>)  $\delta$  7.23 – 7.13 (m, 6H), 7.13 – 7.07 (m, 2H), 7.03 (d,  $J$  = 7.5 Hz, 1H), 5.13 (d,  $J$  = 15.2 Hz, 1H), 4.98 (d,  $J$  = 15.2 Hz, 1H), 4.81 (s, 1H), 4.72 (s, 1H), 4.39 (s, 1H), 4.06 – 3.97 (m, 1H), 1.55 (s, 3H); <sup>13</sup>C NMR (101 MHz, CDCl<sub>3</sub>)  $\delta$  143.3, 141.9, 137.4, 134.1, 130.4, 129.8, 127.8, 126.9, 126.6, 126.5, 124.2, 111.4, 80.8, 68.9, 47.5, 19.7; AMM (CI-TOF)  $m/z$  calcd for C<sub>18</sub>H<sub>22</sub>NO<sup>+</sup> [M+NH<sub>4</sub>]<sup>+</sup> 268.1701, found 268.1702; m.p. 88-90 °C; [ $\alpha$ ]<sub>D</sub><sup>22</sup> = -225.1 (c = 0.46, CHCl<sub>3</sub>).

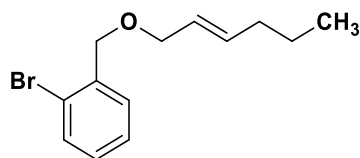

**2-((*E*-hex-2-en-1-yloxy)methyl)bromobenzene (52)** was synthesized according to General Procedure A, using NaH (1.616 g, 40.40 mmol) in THF (50.5 mL), 2-bromobenzyl bromide (2.017 g, 8.071 mmol) in THF (10.1 mL), and *E*-hexen-1-ol (1.42 mL, 12.0 mmol), reacting for 20 h at rt. The crude product was purified using flash column chromatography (90:10, hexanes:EtOAc), affording **52** as a yellow oil (2.057 g, 95%). <sup>1</sup>H NMR (600 MHz, CDCl<sub>3</sub>)  $\delta$  7.53 (d,  $J$  = 8.0 Hz, 1H), 7.49 (d,  $J$  = 7.6 Hz, 1H), 7.31 (t,  $J$  = 7.5 Hz, 1H), 7.14 (t,  $J$  = 7.7 Hz, 1H), 5.75 (dt,  $J$  = 14.5, 6.7

Hz, 1H), 5.66 – 5.59 (m, 1H), 4.56 (s, 2H), 4.05 (d,  $J = 6.2$  Hz, 2H), 2.05 (app. q,  $J = 14.6, 7.2$  Hz, 2H), 1.43 (sextet,  $J = 7.4$  Hz, 2H), 0.92 (t,  $J = 7.4$  Hz, 3H);  $^{13}\text{C}$  NMR (151 MHz,  $\text{CDCl}_3$ )  $\delta$  138.0, 135.2, 132.6, 129.2, 128.9, 127.5, 126.3, 122.8, 71.7, 71.2, 34.6, 22.4, 13.9; AMM (CI-TOF)  $m/z$  calcd for  $\text{C}_{13}\text{H}_{17}\text{BrO}^+ [\text{M}]^+$  268.0463, found 268.0468.

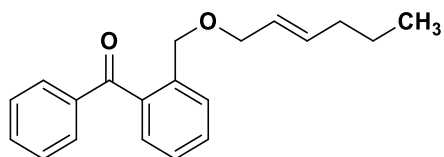

**2-((*E*-hex-2-en-1-yloxy)methyl)benzophenone (53)** was synthesized according to General Procedure J, using **52** (1.002 g, 3.723 mmol) in THF (13.8 mL), 2.13 M *n*-butyllithium in hexanes (2.27 mL, 4.83 mmol), and **31** (0.736 g, 4.46 mmol) in THF (5.6 mL), reacting for 18 h. The crude product was purified using flash column chromatography (95:5, hexanes:EtOAc), affording **53** as a clear oil (0.756 g, 71%).  $^1\text{H}$  NMR (600 MHz,  $\text{CDCl}_3$ )  $\delta$  7.80 (d,  $J = 7.6$  Hz, 2H), 7.60 – 7.54 (m, 2H), 7.51 – 7.42 (m, 3H), 7.38 – 7.32 (m, 2H), 5.54 (dt,  $J = 14.1, 6.7$  Hz, 1H), 5.36 (dt,  $J = 14.6, 6.2$  Hz, 1H), 4.56 (s, 2H), 3.81 (d,  $J = 6.2$  Hz, 2H), 1.92 (app. q,  $J = 14.2, 7.1$  Hz, 2H), 1.31 (sextet,  $J = 7.4$  Hz, 2H), 0.84 (t,  $J = 7.4$  Hz, 3H);  $^{13}\text{C}$  NMR (151 MHz,  $\text{CDCl}_3$ )  $\delta$  198.1, 138.3, 138.0, 137.8, 134.8, 133.1, 130.5, 130.2, 128.8, 128.6, 128.5, 127.0, 126.0, 71.5, 69.5, 34.5, 22.3, 13.8; AMM (ESI)  $m/z$  calcd for  $\text{C}_{20}\text{H}_{23}\text{O}_2^+ [\text{M}+\text{H}]^+$  295.1693, found 295.1694.

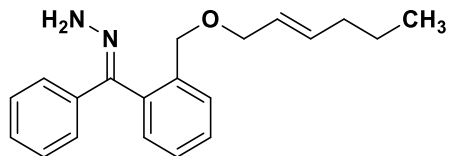

**((2-((*E*-hex-2-en-1-yloxy)methyl)phenyl)(phenyl)methylene)hydrazine (12d)** was synthesized according to General Procedure O, using **53** (0.301 g, 1.02 mmol) in anhydrous EtOH (10.2 mL), hydrazine (0.20 mL, 6.1 mmol), and glacial acetic acid (0.07 mL, 1 mmol) reacting for 5 h at 160 °C. The crude product was purified using flash column chromatography (80 hexanes :20 EtOAc), affording **12d** as a white solid (0.244 g, 77%).  $^1\text{H}$  NMR (400 MHz,  $\text{CDCl}_3$ )  $\delta$  7.66 (d,  $J = 7.2$  Hz, 1H), 7.51 – 7.40 (m, 4H), 7.29 – 7.25 (m, 3H), 7.16 (dd,  $J = 7.3, 1.4$  Hz, 1H), 5.65 – 5.54 (m, 1H), 5.49 – 5.40 (m, 1H), 5.36 (s, 2H), 4.35 – 4.21 (m, 2H), 3.86 (d,  $J = 6.1$  Hz, 2H), 1.95 (app. q,  $J = 7.5, 7.2$  Hz, 2H), 1.34 (sextet,  $J = 7.3$  Hz, 2H), 0.86 (t,  $J = 7.4$  Hz, 3H).

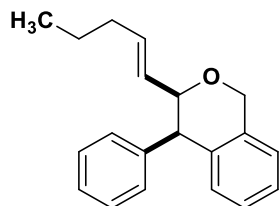

**(3*R*,4*R*)-3-(*E*-pent-1-en-1-yl)-4-phenylisochromane (13d)** was synthesized according to General Procedure R, using  $\text{MnO}_2$  (0.059 g, 0.68 mmol) and **12d** (0.020 g, 0.069 mmol) in  $\text{CH}_3\text{CN}$  (4.6 mL), reacting for 1.5 h.  $\text{Rh}_2(\text{R-PTAD})_4$  (0.001 g, 0.8  $\mu\text{mol}$ ) was added, reacting for 16 h. The crude product was purified using flash column chromatography (90:10, hexanes:EtOAc), affording **13d** as a clear oil (0.019 g, >95:5 dr, 97:3 er, 97%).  $^1\text{H}$  NMR (600 MHz,  $\text{CDCl}_3$ )  $\delta$  7.24 – 7.20 (m, 2H), 7.20 – 7.14 (m, 2H), 7.14 – 7.07 (m, 4H), 7.01 (d,  $J = 7.6$  Hz, 1H), 5.68 (dt,  $J = 14.4, 6.8$  Hz, 1H), 5.11 – 5.04 (m, 2H), 4.98 (d,  $J = 15.2$  Hz, 1H), 4.40 (dd,  $J = 7.1, 3.2$  Hz, 1H), 3.89 (d,  $J = 2.7$  Hz, 1H), 1.91 (app.

q,  $J = 14.2, 7.1$  Hz, 2H), 1.29 (sextet,  $J = 14.6, 7.6$  Hz, 2H), 0.80 (t,  $J = 7.4$  Hz, 3H);  $^{13}\text{C}$  NMR (151 MHz,  $\text{CDCl}_3$ )  $\delta$  141.9, 137.3, 134.2, 133.6, 130.3, 130.2, 128.9, 127.9, 126.9, 126.5, 126.4, 124.1, 79.2, 68.5, 49.1, 34.5, 22.3, 13.8; AMM (CI-TOF)  $m/z$  calcd for  $\text{C}_{20}\text{H}_{26}\text{NO}^+ [\text{M}+\text{NH}_4]^+$  296.2014, found 296.2002;  $[\alpha]_D^{23} = -88.3$  ( $c = 0.52$ ,  $\text{CHCl}_3$ ).

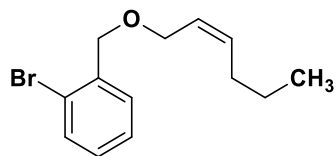

**2-((Z-hex-2-en-1-yloxy)methyl)bromobenzene (54)** was synthesized according to General Procedure A, using NaH (1.611 g, 40.28 mmol) in THF (50.4), 2-bromobenzyl bromide (2.009 g, 8.036 mmol) in THF (10.0 mL), and Z-hexen-1-ol (1.42 mL, 12.0 mmol), reacting for 27 h at room temperature. The crude product was purified using flash column chromatography (95:5, hexanes:EtOAc), affording **54** as a clear oil (1.826 g, 84%).  $^1\text{H}$  NMR (600 MHz,  $\text{CDCl}_3$ )  $\delta$  7.53 (d,  $J = 8.0$  Hz, 1H), 7.49 (d,  $J = 7.6$  Hz, 1H), 7.31 (t,  $J = 7.5$  Hz, 1H), 7.14 (t,  $J = 7.6$  Hz, 1H), 5.68 – 5.58 (m, 2H), 4.57 (s, 2H), 4.16 (d,  $J = 4.9$  Hz, 2H), 2.06 (m, 2H), 1.41 (sextet,  $J = 7.3$  Hz, 2H), 0.91 (t,  $J = 7.4$  Hz, 3H);  $^{13}\text{C}$  NMR (151 MHz,  $\text{CDCl}_3$ )  $\delta$  138.0, 134.1, 132.6, 129.2, 128.9, 127.5, 126.0, 122.8, 71.5, 66.5, 29.8, 22.8, 13.9; AMM (CI-TOF)  $m/z$  calcd for  $\text{C}_{13}\text{H}_{17}\text{BrO}^+ [\text{M}]^+$  268.0463, found 268.0475.

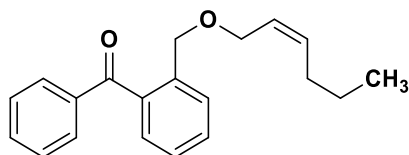

**2-((Z-hex-2-en-1-yloxy)methyl)benzophenone (55)** was synthesized according to General Procedure J, using **54** (1.002 g, 3.721 mmol) in THF (13.8 mL), 2.13 M *n*-butyllithium in hexanes (2.3 mL, 3.0 mmol), and **31** (0.737 g, 4.46 mmol) in THF (5.6 mL), reacting for 21 h. The crude product was purified using flash column chromatography (95:5, hexanes:EtOAc), affording **55** as a clear oil (0.826 g, 75%).  $^1\text{H}$  NMR (600 MHz,  $\text{CDCl}_3$ )  $\delta$  7.80 (d,  $J = 7.9$  Hz, 2H), 7.60 – 7.54 (m, 2H), 7.48 (t,  $J = 7.2$  Hz, 1H), 7.45 (t,  $J = 7.6$  Hz, 2H), 7.38 – 7.32 (m, 2H), 5.52 – 5.45 (m, 1H), 5.41 – 5.35 (m, 1H), 4.58 (s, 2H), 3.93 (d,  $J = 6.5$  Hz, 2H), 1.93 (app. q,  $J = 14.7, 7.3$  Hz, 2H), 1.31 (sextet,  $J = 7.3$  Hz, 2H), 0.85 (t,  $J = 7.4$  Hz, 3H);  $^{13}\text{C}$  NMR (151 MHz,  $\text{CDCl}_3$ )  $\delta$  198.0, 138.3, 137.9, 137.8, 133.6, 133.1, 130.5, 130.2, 128.9, 128.6, 128.5, 127.0, 125.9, 69.8, 66.5, 29.7, 22.8, 13.8; AMM (ESI-TOF)  $m/z$  calcd for  $\text{C}_{20}\text{H}_{23}\text{O}_2^+ [\text{M}+\text{H}]^+$  295.1693, found 295.1689.

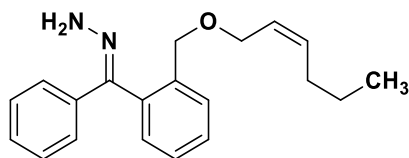

**((2-((Z-hex-2-en-1-yloxy)methyl)phenyl)(phenyl)methylene)hydrazine (12e)** was synthesized according to General Procedure O, using **55** (0.302 g, 1.03 mmol) in anhydrous EtOH (10.3 mL), hydrazine (0.22 mL, 7.0 mmol), and glacial acetic acid (0.08 mL, 1 mmol) reacting for 5.5 h at 150 °C. The crude product was purified using flash column chromatography (80:20, hexanes:EtOAc), affording **12e** as a clear oil (0.245 g, 77%).  $^1\text{H}$  NMR (600 MHz,  $\text{CDCl}_3$ )  $\delta$  7.65 (d,  $J = 7.6$  Hz, 1H), 7.47 (t,  $J = 7.5$  Hz, 1H), 7.46 – 7.38 (m, 3H), 7.31 – 7.22 (m, 3H), 7.15 (d,  $J = 7.3$  Hz, 1H), 5.55 – 5.41 (m, 2H), 5.36 (s, 2H), 4.36 – 4.22 (m, 2H), 4.01 – 3.90 (m, 2H), 1.93 (app. q,  $J = 14.5, 7.3$  Hz, 2H), 1.32

(sextet,  $J = 7.4$  Hz, 2H), 0.84 (t,  $J = 7.4$  Hz, 3H);  $^{13}\text{C}$  NMR (151 MHz,  $\text{CDCl}_3$ )  $\delta$  148.3, 137.9, 137.4, 133.5, 131.9, 129.3, 129.0, 128.7, 128.6, 128.2, 128.1, 125.9, 125.9, 69.7, 66.5, 29.5, 22.6, 13.7.

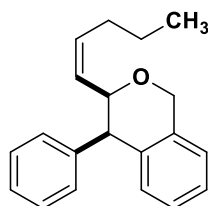

**(3*R*,4*R*)-3-(*Z*-pent-1-en-1-yl)-4-phenylisochromane (13e)** was synthesized according to General Procedure R, using  $\text{MnO}_2$  (0.056 g, 0.65 mmol), **12e** (0.021 g, 0.068 mmol) in  $\text{CH}_3\text{CN}$  (4.5 mL), reacting for 0.5 h.  $\text{Rh}_2(\text{R-PTAD})_4$  (0.001 g, 0.8  $\mu\text{mol}$ ) was added, reacting for 2.5 h. The crude product was purified using flash column chromatography (90:10, hexanes:EtOAc), affording **13e** as a clear oil (0.017 g, >95:5 dr, 95:5 er, 92%).  $^1\text{H}$  NMR (600 MHz,  $\text{CDCl}_3$ )  $\delta$  7.25 – 7.16 (m, 4H), 7.16 – 7.08 (m, 4H), 7.02 (d,  $J = 7.6$  Hz, 1H), 5.53 – 5.41 (m, 1H), 5.07 (d,  $J = 15.2$  Hz, 1H), 5.01 (d,  $J = 15.2$  Hz, 1H), 4.96 (dd,  $J = 9.6, 8.6$  Hz, 1H), 4.76 (dd,  $J = 8.3, 3.0$  Hz, 1H), 3.85 (d,  $J = 2.7$  Hz, 1H), 2.16 – 2.06 (m, 2H), 1.44 (sextet,  $J = 7.1$  Hz, 2H), 0.94 (t,  $J = 7.4$  Hz, 3H);  $^{13}\text{C}$  NMR (151 MHz,  $\text{CDCl}_3$ )  $\delta$  141.8, 137.3, 134.2, 132.4, 130.3, 130.2, 128.7, 127.9, 126.9, 126.6, 126.5, 124.2, 74.3, 68.4, 48.4, 30.4, 22.9, 14.0; AMM (CI-TOF)  $m/z$  calcd for  $\text{C}_{20}\text{H}_{26}\text{NO}^+ [\text{M}+\text{NH}_4]^+$  296.2014, found 296.2024;  $[\alpha]_D^{22} = -146.2$  ( $c = 0.45$ ,  $\text{CHCl}_3$ ).

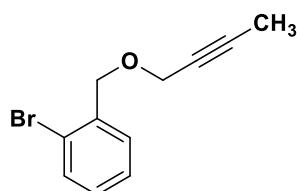

**2-((but-2-yn-1-yloxy)methyl)bromobenzene (56)** was synthesized according to General Procedure A, using NaH (1.216 g, 30.40 mmol) in THF (38.0 mL), 2-bromobenzyl bromide (3.001 g, 12.01 mmol) in THF (15.0 mL), and but-2-yn-1-ol (1.14 mL, 15.2 mmol), reacting for 15 h at 65  $^\circ\text{C}$ . The crude product was purified using flash column chromatography (95:5, hexanes:EtOAc), affording **56** as a clear oil (2.473 g, 86%).  $^1\text{H}$  NMR (400 MHz,  $\text{CDCl}_3$ )  $\delta$  7.54 (d,  $J = 7.9$  Hz, 1H), 7.49 (d,  $J = 7.6$  Hz, 1H), 7.31 (t,  $J = 7.5$  Hz, 1H), 7.14 (t,  $J = 7.6$  Hz, 1H), 4.65 (s, 2H), 4.22 (s, 2H), 1.88 (s, 3H);  $^{13}\text{C}$  NMR (151 MHz,  $\text{CDCl}_3$ )  $\delta$  137.3, 132.6, 129.4, 129.1, 127.5, 123.0, 83.1, 75.0, 71.0, 58.6, 3.8; AMM (CI-TOF)  $m/z$  calcd for  $\text{C}_{11}\text{H}_{15}\text{BrNO}^+ [\text{M}+\text{NH}_4]^+$  256.0332, found 256.0327.

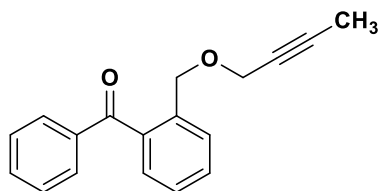

**2-((but-2-yn-1-yloxy)methyl)benzophenone (57)** was synthesized according to General Procedure J, using **56** (0.202 g, 0.846 mmol) in THF (3.1 mL), 2.13 M *n*-butyllithium in hexanes (0.51 mL, 1.1 mmol), and **31** (0.166 g, 1.01 mmol) in THF (1.3 mL), reacting for 21 h. The crude product was purified using flash column chromatography (90:10, hexanes:EtOAc), affording **57** as a clear oil (0.132 g, 59%).  $^1\text{H}$  NMR (400 MHz,  $\text{CDCl}_3$ )  $\delta$  7.80 (d,  $J = 7.9$  Hz, 2H), 7.63

– 7.54 (m, 2H), 7.54 – 7.42 (m, 3H), 7.39 – 7.31 (m, 2H), 4.67 (s, 2H), 4.00 (s, 2H), 1.76 (s, 3H);  $^{13}\text{C}$  NMR (101 MHz,  $\text{CDCl}_3$ )  $\delta$  198.0, 138.0, 137.8, 137.8, 133.1, 130.7, 130.3, 129.0, 128.8, 128.5, 127.1, 82.9, 74.9, 69.1, 58.4, 3.7; AMM (ESI)  $m/z$  calcd for  $\text{C}_{18}\text{H}_{17}\text{O}_2^+$   $[\text{M}+\text{H}]^+$  265.1223, found 265.1235.

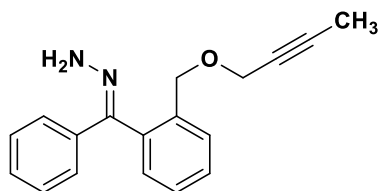

**((2-((but-2-yn-1-yloxy)methyl)phenyl)(phenyl)methylene)hydrazine (12f)** was synthesized according to General Procedure P, using **57** (0.132 g, 0.501 mmol) in anhydrous EtOH (5.0 mL), hydrazine (0.10 mL, 3.2 mmol), and glacial acetic acid (0.03 mL, 0.6 mmol) reacting for 3 d at 90 °C. The crude product was purified using flash column chromatography (80:20, hexanes:EtOAc), affording **12f** as a yellow oil (0.108 g, 78%).  $^1\text{H}$  NMR (400 MHz,  $\text{CDCl}_3$ )  $\delta$  7.67 (d,  $J = 7.3$  Hz, 1H), 7.51 – 7.41 (m, 4H), 7.31 – 7.24 (m, 3H), 7.17 (d,  $J = 7.2$  Hz, 1H), 5.37 (s, 2H), 4.44 – 4.30 (m, 2H), 4.04 (s, 2H), 1.76 (s, 3H).

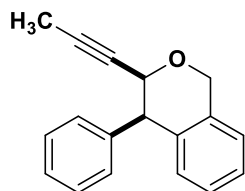

**(3S,4R)-4-phenyl-3-(prop-1-yn-1-yl)isochromane (13f)** was synthesized according to General Procedure R, using  $\text{MnO}_2$  (0.063 g, 0.72 mmol), **12f** (0.025 g, 0.090 mmol) in  $\text{CH}_3\text{CN}$  (6.0 mL), reacting for 0.75 h.  $\text{Rh}_2(\text{R-PTAD})_4$  (0.001 g, 0.9  $\mu\text{mol}$ ) was added, reacting for 4 h. The crude product was purified using flash column chromatography (90:10, hexanes:EtOAc), affording **13f** as a clear oil (0.014 g, >95:5 dr, 92:8 er, 64%).  $^1\text{H}$  NMR (400 MHz,  $\text{CDCl}_3$ )  $\delta$  7.31 – 7.17 (m, 6H), 7.13 (t,  $J = 7.4$  Hz, 1H), 7.07 (d,  $J = 7.5$  Hz, 1H), 6.99 (d,  $J = 7.6$  Hz, 1H), 5.12 (d,  $J = 15.2$  Hz, 1H), 4.91 (d,  $J = 15.2$  Hz, 1H), 4.77 (br s, 1H), 4.13 (d,  $J = 3.5$  Hz, 1H), 1.70 (s, 3H);  $^{13}\text{C}$  NMR (101 MHz,  $\text{CDCl}_3$ )  $\delta$  140.9, 135.8, 134.0, 130.4, 129.9, 127.8, 126.9, 126.9, 126.7, 124.1, 85.2, 75.9, 69.8, 67.4, 48.6, 3.7; AMM (ESI)  $m/z$  calcd for  $\text{C}_{18}\text{H}_{17}\text{O}^+$   $[\text{M}+\text{H}]^+$  249.1274, found 249.1275;  $[\alpha]_D^{20} = -46.7$  ( $c = 0.69$ ,  $\text{CHCl}_3$ ).

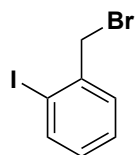

**1-(bromomethyl)-2-iodobenzene (58)**. Following a literature procedure,<sup>18</sup> phosphorus tribromide (0.72 mL, 7.7 mmol) was added to a solution of 2-iodobenzyl alcohol (3.000 g, 12.82 mmol) in THF (64 mL) at 0 °C under argon. The reaction was stirred for one hour at 0 °C and then was concentrated *in vacuo* (NOTE: concentration *in vacuo* should be performed in a fume hood). The crude product was purified using flash column chromatography (85:15, hexanes:EtOAc) affording **58** as white crystals (3.685 g, 97%).  $^1\text{H}$  NMR (600 MHz,  $\text{CDCl}_3$ )  $\delta$  7.86 (d,  $J = 8.0$  Hz, 1H), 7.48 (d,  $J = 7.6$  Hz, 1H), 7.34 (t,  $J = 7.5$  Hz, 1H), 6.98 (t,  $J = 7.7$  Hz, 1H), 4.60 (s, 2H).  $^1\text{H}$  NMR data matched literature values.<sup>18</sup>

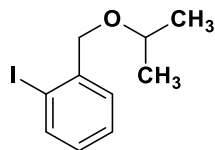

**2-(isopropoxymethyl)iodobenzene (59)** was synthesized according to General Procedure A, using NaH (0.410 g, 17.1 mmol) in THF (21.4 mL), **58** (1.005 g, 3.385 mmol) in THF (4.2 mL), and *i*-PrOH (0.64 mL, 11 mmol, previously dried over activated 3 Å molecular sieves for a minimum of 24 h), reacting at 50 °C for 24 h. The crude product was purified using flash column chromatography (50:50, hexanes:CH<sub>2</sub>Cl<sub>2</sub>), affording **59** as a yellow oil (0.617 g, 66%). <sup>1</sup>H NMR (400 MHz, CDCl<sub>3</sub>) δ 7.80 (d, *J* = 7.9 Hz, 1H), 7.46 (d, *J* = 7.4 Hz, 1H), 7.34 (t, *J* = 7.5 Hz, 1H), 6.96 (t, *J* = 8.2 Hz, 1H), 4.47 (s, 2H), 3.75 (hept, *J* = 6.1 Hz, 1H), 1.26 (d, *J* = 6.1 Hz, 6H); <sup>13</sup>C NMR (101 MHz, CDCl<sub>3</sub>) δ 141.3, 139.1, 129.0, 128.8, 128.3, 97.8, 74.2, 71.8, 22.3; AMM (CI-TOF) *m/z* calcd for C<sub>10</sub>H<sub>13</sub>IO<sup>+</sup> [M]<sup>+</sup> 276.0011, found 276.0015.

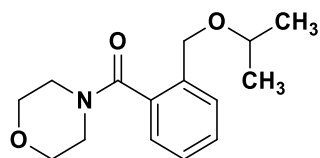

**(isopropoxymethyl-phenyl)-morpholin-4-yl-methanone (60)** was synthesized according to General Procedure D, using Pd(OAc)<sub>2</sub> (0.012 g, 0.052 mmol), Xantphos (0.058 g, 0.10 mmol), and potassium phosphate tribasic (1.271 g, 5.989 mmol), morpholine (0.26 mL, 3.0 mmol), and **59** (0.557 g, 2.00 mmol) in *m*-xylene (4.0 mL), reacting at 100 °C for 6.5 h. The crude product was purified using flash column chromatography (40:60, hexanes:EtOAc), affording **60** as a yellow oil (0.439 g, 83%). <sup>1</sup>H NMR (400 MHz, CDCl<sub>3</sub>) δ 7.45 (d, *J* = 7.5 Hz, 1H), 7.36 (t, *J* = 7.4 Hz, 1H), 7.30 (t, *J* = 7.4 Hz, 1H), 7.18 (d, *J* = 7.4 Hz, 1H), 4.61 (br s, 1H), 4.42 (s, 1H), 3.97 – 3.64 (m, 5H), 3.59 (s, 2H), 3.26 (s, 2H), 1.21 (d, *J* = 6.1 Hz, 6H); <sup>13</sup>C NMR (101 MHz, CDCl<sub>3</sub>) δ 169.9, 136.2, 135.1, 129.4, 129.2, 127.7, 126.0, 71.9, 67.9, 66.8, 47.7, 42.0, 22.2; AMM (ESI) *m/z* calcd for C<sub>15</sub>H<sub>22</sub>NO<sub>3</sub><sup>+</sup> [M+H]<sup>+</sup> 264.1594, found 264.1594. <sup>1</sup>H NMR and <sup>13</sup>C NMR were taken at rt and show a mixture of rotamers.

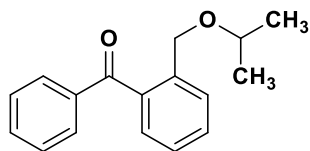

**2-(isopropoxymethyl)benzophenone (61)** was synthesized according to General Procedure E, using **60** (0.552 g, 2.10 mmol) in THF (21.0 mL), and 1.9 M phenyllithium in dibutyl ether (2.21 mL, 4.20 mmol), reacting for 2 h. The crude product was purified using flash column chromatography (90:10 to 80:20, hexanes:EtOAc), affording **61** as a yellow oil (0.385 g, 72%). <sup>1</sup>H NMR (600 MHz, CDCl<sub>3</sub>) δ 7.82 (d, *J* = 8.0 Hz, 2H), 7.60 – 7.53 (m, 2H), 7.50 – 7.42 (m, 3H), 7.33 (d, *J* = 3.8 Hz, 2H), 4.58 (s, 2H), 3.50 (hept, *J* = 6.1 Hz, 1H), 1.00 (d, *J* = 6.1 Hz, 6H); <sup>13</sup>C NMR (151 MHz, CDCl<sub>3</sub>) δ 198.1, 138.7, 138.1, 137.8, 133.1, 130.4, 130.3, 128.6, 128.6, 128.4, 126.9, 71.9, 67.9, 21.9; AMM (ESI) *m/z* calcd for C<sub>17</sub>H<sub>19</sub>O<sub>2</sub><sup>+</sup> [M+H]<sup>+</sup> 255.1380, found 255.1378.



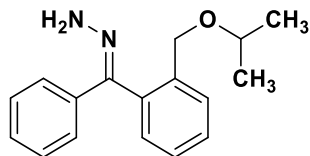

**((2-((isopropoxy)methyl)phenyl)(phenyl)methylene)hydrazine (14a)** was synthesized according to General Procedure O, using **61** (0.385 g, 1.51 mmol) in anhydrous EtOH (15.1 mL), glacial acetic acid (0.10 mL, 1.8 mmol), and hydrazine (0.62 mL, 20 mmol), reacting at 170 °C for 3h. The crude product was purified using flash column chromatography (80:20, hexanes:EtOAc), affording **14a** as a yellow oil (0.308 g, 76%). <sup>1</sup>H NMR (400 MHz, CDCl<sub>3</sub>) δ 7.65 (d, *J* = 7.4 Hz, 1H), 7.51 – 7.39 (m, 4H), 7.32 – 7.22 (m, 3H), 7.16 (d, *J* = 7.2 Hz, 1H), 5.36 (s, 2H), 4.31 (d, *J* = 11.8 Hz, 1H), 4.26 (d, *J* = 11.8 Hz, 1H), 3.53 (hept, *J* = 6.1 Hz, 1H), 1.09 (d, *J* = 6.1 Hz, 3H), 1.04 (d, *J* = 6.1 Hz, 3H); AMM (ESI) *m/z* calcd for C<sub>17</sub>H<sub>21</sub>N<sub>2</sub>O<sup>+</sup> [M+H]<sup>+</sup> 269.1648, found 269.1657; IR (neat): 3400, 2971, 2930, 1126, 1068 cm<sup>-1</sup>.

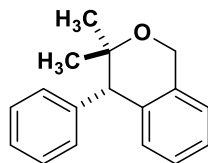

**(S)-3,3-dimethyl-4-phenylisochromane (15a)** was synthesized according to General Procedure R, using MnO<sub>2</sub> (0.130 g, 1.49 mmol) and **14a** (0.055 g, 0.19 mmol) in CH<sub>3</sub>CN (12.7 mL), reacting for 30 min. Rh<sub>2</sub>(S-PTAD)<sub>4</sub> (0.003 g, 2 μmol) was added, reacting for 4 h. The crude product was purified using flash column chromatography (50:50, hexanes:CH<sub>2</sub>Cl<sub>2</sub>), affording **15a** as a white crystalline solid (0.046 g, 96:4 er, 95%). <sup>1</sup>H NMR (600 MHz, CD<sub>2</sub>Cl<sub>2</sub>) δ 7.26 (s, 2H), 7.21 – 7.13 (m, 4H), 7.10 (t, *J* = 7.0 Hz, 2H), 6.95 (d, *J* = 7.8 Hz, 1H), 4.97 (d, *J* = 15.9 Hz, 1H), 4.90 (d, *J* = 15.9 Hz, 1H), 3.74 (s, 1H), 1.32 (s, 3H), 0.97 (s, 3H); <sup>13</sup>C NMR (101 MHz, CD<sub>3</sub>CN) δ 143.7, 137.0, 133.6, 130.2, 129.6, 127.8, 126.4, 126.2, 126.0, 123.9, 73.0, 62.5, 52.7, 26.3, 24.6; AMM (CI-TOF) *m/z* calcd for C<sub>17</sub>H<sub>22</sub>NO<sup>+</sup> [M+NH<sub>4</sub>]<sup>+</sup> 256.1701, found 256.1706; m.p. 105-106 °C; [α]<sub>D</sub><sup>22</sup> = 119.2 (c = 0.29, CHCl<sub>3</sub>).

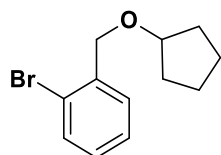

**2-((cyclopentyloxy)methyl)bromobenzene (62)** was synthesized according to General Procedure A, using NaH (0.960 g, 24.0 mmol) in THF (30.0 mL), 2-bromobenzyl bromide (2.002 g, 8.010 mmol) in THF (10.0 mL), and cyclopentanol (1.09 mL, 12.0 mmol, previously dried over activated 3 Å molecular sieves for a minimum of 24 h), reacting for 53 h. The crude product was purified using flash column chromatography (95:5, hexanes:EtOAc), affording **62** as a yellow oil (1.903 g, 93%). <sup>1</sup>H NMR (600 MHz, CDCl<sub>3</sub>) δ 7.51 (d, *J* = 8.0 Hz, 1H), 7.49 (d, *J* = 7.5 Hz, 1H), 7.30 (t, *J* = 7.5 Hz, 1H), 7.12 (t, *J* = 7.6 Hz, 1H), 4.52 (s, 2H), 4.09 – 4.02 (m, 1H), 1.81 – 1.68 (m, 6H), 1.61 – 1.50 (m, 2H); <sup>13</sup>C NMR (151 MHz, CDCl<sub>3</sub>) δ 138.5, 132.5, 129.1, 128.7, 127.5, 122.6, 81.7, 70.2, 32.5, 23.8; AMM (CI-TOF) *m/z* calcd for C<sub>12</sub>H<sub>15</sub>BrO<sup>+</sup> [M]<sup>+</sup> 254.0306, found 254.0305.

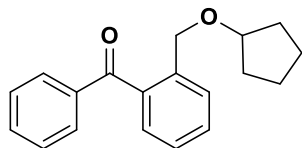

**2-(cyclopentyloxymethyl)benzophenone (63)** was synthesized according to General Procedure J, using **62** (0.376 g, 1.25 mmol) in THF (4.6 mL), 1.68 M *n*-butyllithium in hexanes (0.96 mL, 1.7 mmol), and **31** (0.247 g, 1.50 mmol) in THF (1.9 mL), reacting for 20h. The crude product was purified using flash column chromatography (90:10, hexanes:EtOAc), affording **63** as a clear oil (0.248 g, 71%). <sup>1</sup>H NMR (400 MHz, CDCl<sub>3</sub>) δ 7.81 (d, *J* = 7.7 Hz, 2H), 7.62 – 7.50 (m, 2H), 7.50 – 7.39 (m, 3H), 7.33 (d, *J* = 4.0 Hz, 2H), 4.53 (s, 2H), 3.85 – 3.75 (m, 1H), 1.63 – 1.30 (m, 8H); <sup>13</sup>C NMR (151 MHz, CDCl<sub>3</sub>) δ 198.1, 138.6, 138.1, 137.7, 133.1, 130.3, 130.2, 128.6, 128.5, 128.4, 126.9, 81.7, 68.5, 32.0, 23.6; AMM (ESI-TOF) *m/z* calcd for C<sub>19</sub>H<sub>21</sub>O<sub>2</sub><sup>+</sup> [M+H]<sup>+</sup> 281.1536, found 281.1552.

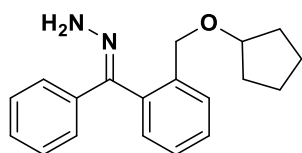

**((2-((cyclopropyloxy)methyl)phenyl)(phenyl)methylene)hydrazine (14b)** was synthesized according to General Procedure O, using **63** (0.303 g, 1.08 mmol) in anhydrous EtOH (10.8 mL), hydrazine (0.20 mL, 6.4 mmol), and glacial acetic acid (0.07 mL, 1 mmol), reacting for 8 hr at 170 °C. The crude product was purified using flash column chromatography (80:20, hexanes:EtOAc), affording **14b** as a clear oil (0.318 g, 100%). <sup>1</sup>H NMR (600 MHz, CDCl<sub>3</sub>) δ 7.63 (d, *J* = 7.3 Hz, 1H), 7.49 – 7.40 (m, 4H), 7.31 – 7.23 (m, 3H), 7.15 (d, *J* = 8.1 Hz, 1H), 5.36 (s, 2H), 4.24 (q, *J* = 11.9 Hz, 2H), 3.90 – 3.80 (m, 1H), 1.66 – 1.50 (m, 6H), 1.49 – 1.38 (m, 2H).

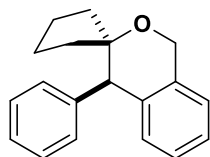

**(4R)-spiro[cyclopentane-1,3'-(4-phenyl)isochromane] (15b)** was synthesized according to General Procedure R, using MnO<sub>2</sub> (0.060 g, 0.69 mmol) and **14b** (0.023 g, 0.077 mmol) in CH<sub>3</sub>CN (5.1 mL), reacting for 1 h. Rh<sub>2</sub>(*R*-PTAD)<sub>4</sub> (0.001 g, 0.8 μmol) was added, reacting for 2 h. The crude product was purified using flash column chromatography (80:20, hexanes:EtOAc), affording **15b** as a clear oil (0.018 g, 97:3 er, 90%). <sup>1</sup>H NMR (400 MHz, CDCl<sub>3</sub>) δ 7.28 – 7.12 (m, 6H), 7.08 (t, *J* = 8.2 Hz, 2H), 6.99 (d, *J* = 7.5 Hz, 1H), 4.99 (d, *J* = 16.0 Hz, 1H), 4.91 (d, *J* = 16.0 Hz, 1H), 3.72 (s, 1H), 2.10 – 1.97 (m, 1H), 1.88 – 1.55 (m, 4H), 1.55 – 1.36 (m, 2H), 1.36 – 1.20 (m, 1H); <sup>13</sup>C NMR (101 MHz, CDCl<sub>3</sub>) δ 143.9, 137.2, 133.6, 130.3, 129.5, 128.1, 126.6, 126.4, 126.3, 124.0, 85.4, 63.1, 52.2, 37.3, 34.4, 23.9, 23.1; Low-resolution MS (Advion ASAP-APCI) *m/z* calcd for C<sub>19</sub>H<sub>21</sub>O<sup>+</sup> [M+H]<sup>+</sup> 265.1587, found 265.0; [α]<sub>D</sub><sup>22</sup> = –34.9 (c = 0.20, CHCl<sub>3</sub>).

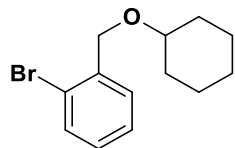

**2-(cyclohexyloxy)methylbromobenzene (64)** was synthesized according to General Procedure A, using NaH (0.480 g, 12.0 mmol) in THF (15.0 mL), 2-bromobenzyl bromide (1.034 g, 3.139 mmol) in THF (3.9 mL), and cyclohexanol (0.53 mL, 5.1 mmol, previously dried over activated 3 Å molecular sieves for a minimum of 24 h), reacting at 50 °C for 14 h. The crude product was purified using flash column chromatography (80:20, hexanes:EtOAc), affording **64** as a clear oil (0.832 g, 87%). <sup>1</sup>H NMR (600 MHz, CDCl<sub>3</sub>) δ 7.55 – 7.49 (m, 2H), 7.30 (t, *J* = 7.5 Hz, 1H), 7.11 (t, *J* = 7.7 Hz, 1H), 4.59 (s, 2H), 3.44 – 3.35 (m, 1H), 2.03 – 1.94 (m, 2H), 1.81 – 1.73 (m, 2H), 1.58 – 1.50 (m, 1H), 1.45 – 1.36 (m, 2H), 1.32 – 1.18 (m, 3H); <sup>13</sup>C NMR (151 MHz, CDCl<sub>3</sub>) δ 138.7, 132.5, 129.0, 128.7, 127.4, 122.6, 77.8, 69.3, 32.4, 26.0, 24.2; AMM (CI-TOF) *m/z* calcd for C<sub>13</sub>H<sub>17</sub>BrO<sup>+</sup> [M]<sup>+</sup> 268.0463, found 268.0463.

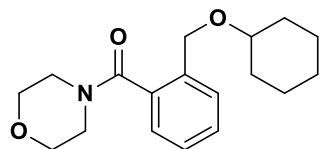

**(cyclohexyloxymethyl-phenyl)-morpholin-4-yl-methanone (65)** was synthesized according to General Procedure D, using Pd(OAc)<sub>2</sub> (0.010 g, 0.043 mmol), Xantphos (0.046 g, 0.080 mmol), and potassium phosphate tribasic (1.015 g, 4.780 mmol), morpholine (0.21 mL, 2.4 mmol), and **64** (0.430 g, 1.60 mmol) in *m*-xylene (3.2 mL), reacting at 100 °C for 17 h. The crude product was purified using flash column chromatography (30:70, hexanes:EtOAc), affording **65** as a clear oil (0.411 g, 47%). <sup>1</sup>H NMR (600 MHz, CDCl<sub>3</sub>) δ 7.45 (d, *J* = 7.6 Hz, 1H), 7.36 (t, *J* = 7.5 Hz, 1H), 7.30 (t, *J* = 7.5 Hz, 1H), 7.18 (d, *J* = 7.5 Hz, 1H), 4.65 (br s, 1H), 4.46 (br s, 1H), 3.97 – 3.65 (m, 4H), 3.60 (br d, *J* = 14.5 Hz, 2H), 3.42 – 3.33 (m, 1H), 3.27 (br d, *J* = 13.6 Hz, 2H), 1.98 (d, *J* = 9.6 Hz, 2H), 1.81 – 1.71 (m, 2H), 1.60 – 1.52 (m, 1H), 1.37 – 1.15 (m, 5H); <sup>13</sup>C NMR (151 MHz, CDCl<sub>3</sub>) δ 170.1, 136.4, 135.2, 129.5, 127.7, 126.1, 78.1, 67.7, 66.9, 47.8, 42.1, 32.5, 25.9, 24.3; AMM (ESI) *m/z* calcd for C<sub>18</sub>H<sub>26</sub>NO<sub>3</sub><sup>+</sup> [M+H]<sup>+</sup> 304.1907, found 304.1902; IR (neat): 2930, 2855, 1639, 1428, 1115 cm<sup>-1</sup>. <sup>1</sup>H NMR and <sup>13</sup>C NMR were taken at rt and show a mixture of rotamers.

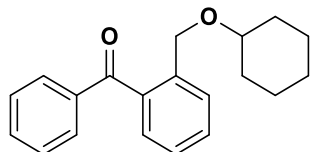

**2-(cyclohexyloxymethyl)benzophenone (66)** was synthesized according to General Procedure E, using **65** (0.427 g, 1.41 mmol) in THF (14.1 mL), and 1.9 M phenyllithium in dibutyl ether (1.48 mL, 2.82 mmol), reacting for 2 h. The crude product was purified using flash column chromatography (90:10, hexanes:EtOAc), affording **66** as a yellow oil (0.339 g, 82%). <sup>1</sup>H NMR (600 MHz, CDCl<sub>3</sub>) δ 7.84 – 7.78 (m, 2H), 7.60 – 7.54 (m, 2H), 7.49 – 7.42 (m, 3H), 7.33 (d, *J* = 4.4 Hz, 2H), 4.61 (s, 2H), 3.22 – 3.14 (m, 1H), 1.76 – 1.67 (m, 2H), 1.65 – 1.55 (m, 2H), 1.48 – 1.40 (m, 1H), 1.19 – 1.06 (m, 5H); <sup>13</sup>C NMR (151 MHz, CDCl<sub>3</sub>) δ 198.1, 138.9, 138.1, 137.8, 133.1, 130.4, 130.3, 128.6, 128.6, 128.4,

126.8, 77.8, 67.6, 31.9, 25.9, 24.1; AMM (ESI)  $m/z$  calcd for  $C_{20}H_{23}O_2^+$   $[M+H]^+$  295.1693, found 295.1690; IR (neat): 2932, 2856, 1667, 1449, 1272  $cm^{-1}$ .

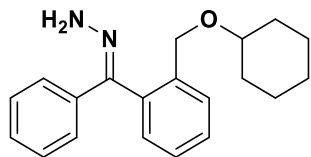

**((2-((cyclohexyloxy)methyl)phenyl)(phenyl)methylene)hydrazine (14c)** was synthesized according to General Procedure O, using **66** (0.306 g, 1.04 mmol) in anhydrous EtOH (10.4 mL), glacial acetic acid (0.07 mL, 1 mmol), and hydrazine (0.19 mL, 6.1 mmol), reacting for 6 h at 170 °C. The crude product was purified using flash column chromatography (80:20, hexanes:EtOAc), affording **14c** as a yellow oil (0.312 g, 97%).  $^1H$  NMR (600 MHz,  $CDCl_3$ )  $\delta$  7.67 (d,  $J$  = 7.6 Hz, 1H), 7.49 – 7.40 (m, 4H), 7.31 – 7.22 (m, 3H), 7.15 (d,  $J$  = 7.3 Hz, 1H), 5.37 (s, 2H), 4.38 – 4.26 (m, 2H), 3.23 – 3.14 (m, 1H), 1.85 – 1.78 (m, 1H), 1.78 – 1.73 (m, 1H), 1.70 – 1.61 (m, 2H), 1.48 (s, 1H), 1.27 – 1.11 (m, 5H); AMM (ESI)  $m/z$  calcd for  $C_{20}H_{25}N_2O^+$   $[M+H]^+$  309.1961, found 309.1957.

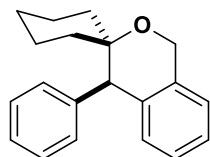

**(R)-spiro[cyclohexane-1,3'-(4-phenyl)isochromane] (15c)** was synthesized according to General Procedure S, using  $MnO_2$  (0.056 g, 0.73 mmol) and **14c** (0.026 g, 0.08 mmol) in  $CH_2Cl_2$  (5.3 mL), reacting for 2.5 h.  $Rh_2(R-PTAD)_4$  (0.001 g, 1  $\mu$ mol) was added, reacting for 1.5 h. The crude product was purified using flash column chromatography (90:10, hexanes:EtOAc), affording **15c** as a white solid (0.019 g, 95:5 er, 80%).  $^1H$  NMR (600 MHz,  $CDCl_3$ )  $\delta$  7.26 – 7.20 (m, 2H), 7.19 – 7.10 (m, 4H), 7.10 – 7.04 (m, 2H), 6.95 (d,  $J$  = 7.6 Hz, 1H), 4.95 (d,  $J$  = 15.9 Hz, 1H), 4.87 (d,  $J$  = 15.9 Hz, 1H), 3.69 (s, 1H), 1.97 (d,  $J$  = 13.1 Hz, 1H), 1.62 – 1.51 (m, 4H), 1.47 – 1.40 (m, 1H), 1.35 (t,  $J$  = 11.1 Hz, 1H), 1.26 – 1.16 (m, 3H);  $^{13}C$  NMR (101 MHz,  $CD_2Cl_2$ )  $\delta$  143.10, 136.77, 133.71, 130.46, 129.76, 127.76, 126.42, 126.12, 125.89, 123.79, 73.73, 62.01, 53.01, 34.96, 33.07, 25.83, 22.29, 21.57.; AMM (CI-TOF)  $m/z$  calcd for  $C_{20}H_{26}NO^+$   $[M+NH_4]^+$  296.2014, found 296.2029; m.p. 109-112 °C;  $[\alpha]_D^{22} = -48.3$  ( $c$  = 0.20,  $CHCl_3$ ). Note: compound appears to degrade rapidly on silica gel during purification, a very small silica gel plug was used to remove the catalyst from the reaction mixture.

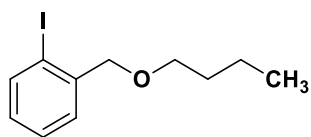

**1-(butoxymethyl)-2-iodobenzene (67)** was synthesized according to General Procedure C using 2-iodobenzyl alcohol (2.000 g, 8.546 mmol) in THF (4 mL), NaH (1.712 g, 42.80 mmol) in THF (10 mL), *n*-butyl bromide (4.58 mL, 42.8 mmol), and tetrabutylammonium iodide (0.380 g, 10.3 mmol). The crude product was purified using flash column chromatography (95:5 hexanes:EtOAc) affording **67** as a clear oil (2.257 g, 91%).  $^1H$  NMR (400 MHz,  $CDCl_3$ )  $\delta$  7.76 (d,  $J$  = 7.8 Hz, 1H), 7.42 (d,  $J$  = 7.5 Hz, 1H), 7.29 (t,  $J$  = 7.5 Hz, 1H), 6.95 – 6.87 (m, 1H), 4.43 (s, 2H), 3.52 (t,  $J$  =

6.5 Hz, 2H), 1.67 – 1.57 (m, 2H), 1.48 – 1.35 (m, 2H), 0.92 (t,  $J = 7.4$  Hz, 3H).  $^1\text{H}$  NMR data was consistent with literature values.<sup>14</sup>

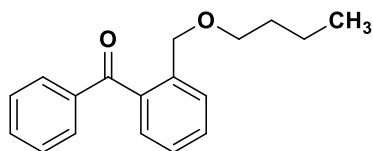

**(2-(butoxymethyl)phenyl)(phenyl)methanone (68)** was synthesized according to General Procedure N using **67** (0.300 g, 1.03 mmol), palladium (II) acetate (0.012 g, 0.052 mmol), silver (I) oxide (0.288 g, 1.24 mmol), benzaldehyde (0.84 mL, 8.3 mmol), and 70% *tert*-butyl hydroperoxide in  $\text{H}_2\text{O}$  (0.73 mL, 5.3 mmol). The crude product was purified using flash column chromatography (90:10 to 0:100 hexanes: $\text{CH}_2\text{Cl}_2$ ) affording **68** as a yellow oil (0.133 g, 48%).  $^1\text{H}$  NMR (400 MHz,  $\text{CDCl}_3$ )  $\delta$  7.84 – 7.77 (m, 2H), 7.60 – 7.52 (m, 2H), 7.51 – 7.41 (m, 3H), 7.38 – 7.31 (m, 2H), 4.57 (s, 2H), 3.32 (t,  $J = 6.6$  Hz, 2H), 1.44 – 1.33 (m, 2H), 1.27 – 1.15 (m, 2H), 0.79 (t,  $J = 7.3$  Hz, 3H);  $^{13}\text{C}$  NMR (101 MHz,  $\text{CDCl}_3$ )  $\delta$  198.0, 138.5, 137.9, 137.8, 133.1, 130.4, 130.2, 128.7, 128.5, 128.4, 126.9, 70.9, 70.6, 31.7, 19.3, 14.0; AMM (ESI)  $m/z$  calcd for  $\text{C}_{18}\text{H}_{21}\text{O}_2^+$   $[\text{M}+\text{H}]^+$  269.1536, found 269.1535; IR (neat):  $\nu_{\text{max}}$  2957, 1667, 1270  $\text{cm}^{-1}$ .

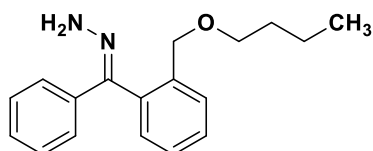

**((2-(butoxymethyl)phenyl)(phenyl)methylene)hydrazine (14d)** was synthesized according to General Procedure O using **68** (0.120 g, 0.447 mmol), hydrazine (0.14 mL, 4.5 mmol), acetic acid (0.03 mL, 0.5 mmol) and anhydrous ethanol (4.5 mL). The crude product was purified using flash column chromatography (95:5 to 80:20 hexanes:EtOAc) affording **14d** as a yellow oil (0.114 g, 90%).  $^1\text{H}$  NMR (400 MHz,  $\text{CDCl}_3$ )  $\delta$  7.65 (d,  $J = 7.3$  Hz, 1H), 7.52 – 7.40 (m, 4H), 7.31 – 7.26 (m, 3H), 7.16 (dd,  $J = 7.3, 1.6$  Hz, 1H), 5.36 (s, 2H), 4.32 (d,  $J = 12.2$  Hz, 1H), 4.26 (d,  $J = 12.2$  Hz, 1H), 3.36 (t,  $J = 6.6$  Hz, 2H), 1.53 – 1.41 (m, 2H), 1.37 – 1.22 (m, 2H), 0.86 (t,  $J = 7.4$  Hz, 3H).

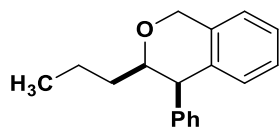

**(3R,4R)-4-phenyl-3-propylisochromane (15d)** was synthesized according to General Procedure R using **14d** (0.050 g, 0.18 mmol), manganese (IV) oxide (0.123 g, 0.708 mmol),  $\text{Rh}_2(\text{R-PTAD})_4$  (0.003 g, 0.01 mmol), and  $\text{CH}_2\text{Cl}_2$  (12 mL). The crude product was purified using flash column chromatography (97:3 hexanes:EtOAc) affording **15d** as a clear oil (0.024 g, 54%, >95:5 dr, >99.5:0.5 er).  $^1\text{H}$  NMR (400 MHz,  $\text{CDCl}_3$ )  $\delta$  7.27 – 7.20 (m, 2H), 7.20 – 7.13 (m, 4H), 7.13 – 7.05 (m, 2H), 7.00 (d,  $J = 7.6$  Hz, 1H), 5.04 (d,  $J = 15.1$  Hz, 1H), 4.91 (d,  $J = 15.1$  Hz, 1H), 3.91 – 3.82 (m, 1H), 3.81 (d,  $J = 3.2$  Hz, 1H), 1.58 – 1.31 (m, 2H), 1.31 – 1.20 (m, 1H), 1.20 – 1.08 (m, 1H), 0.86 (t,  $J = 7.4$  Hz, 3H);  $^{13}\text{C}$  NMR (101 MHz,  $\text{CDCl}_3$ )  $\delta$  142.3, 137.8, 134.4, 130.4, 129.9, 128.1, 126.8, 126.4, 126.4, 124.2, 78.0, 68.9, 48.1, 35.8, 19.3, 14.2; AMM (CI-TOF)  $m/z$  calcd for  $\text{C}_{18}\text{H}_{24}\text{NO}^+$   $[\text{M}+\text{NH}_4]^+$  270.1852, found 270.1866; IR (neat):  $\nu_{\text{max}}$  3024, 2958, 1493, 742  $\text{cm}^{-1}$ ;  $[\alpha]_D^{21} = -21.4$  (c = 2.4,  $\text{CHCl}_3$ ).

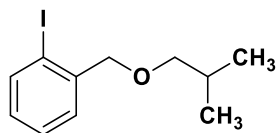

**1-iodo-2-(isobutoxymethyl)benzene (69)** was synthesized according to General Procedure C using 2-iodobenzyl alcohol (1.000 g, 4.273 mmol) in THF (2 mL), NaH (0.855 g, 21.4 mmol) in THF (1.5 mL), 1-bromo-2-methylpropane (2.32 mL, 21.4 mmol), and tetrabutylammonium iodide (0.221 g, 0.598 mmol). The crude product was purified using flash column chromatography (99:1 to 98:2, hexanes:CH<sub>2</sub>Cl<sub>2</sub>) affording **69** as a clear oil (0.493 g, 40%). <sup>1</sup>H NMR (400 MHz, CDCl<sub>3</sub>) δ 7.81 (d, *J* = 7.9 Hz, 1H), 7.45 (d, *J* = 7.4 Hz, 1H), 7.34 (t, *J* = 7.5 Hz, 1H), 7.01 – 6.93 (m, 1H), 4.47 (s, 2H), 3.32 (d, *J* = 6.7 Hz, 2H), 2.02 – 1.90 (m, 1H), 0.96 (d, *J* = 6.7 Hz, 6H); <sup>13</sup>C NMR (151 MHz, (CD<sub>3</sub>)<sub>2</sub>CO) δ 141.9, 139.8, 130.0, 129.5, 129.0, 97.9, 78.1, 77.1, 29.3, 19.7.; AMM (CI-TOF) *m/z* calcd for C<sub>11</sub>H<sub>15</sub>IO<sup>+</sup> [M]<sup>+</sup> 290.0168, found 290.0178.

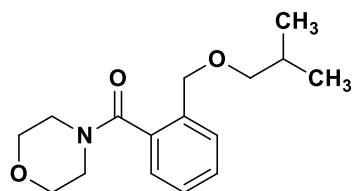

**(2-(isobutoxymethyl)phenyl)(morpholino)methanone (70)** was synthesized according to General Procedure D using **69** (0.290 g, 0.999 mmol), palladium (II) acetate (0.006 g, 0.02 mmol), morpholine (0.13 mL, 1.5 mmol), Xantphos (0.029 g, 0.050 mmol), potassium phosphate tribasic (0.637 g, 3.00 mmol), and toluene (2 mL). The crude product was purified using flash column chromatography (90:10 to 50:50, hexanes:EtOAc) affording **70** as a red oil (0.259 g, 93%). <sup>1</sup>H NMR (400 MHz, CDCl<sub>3</sub>) δ 7.46 (d, *J* = 7.7 Hz, 1H), 7.37 (t, *J* = 7.5 Hz, 1H), 7.30 (t, *J* = 7.5 Hz, 1H), 7.18 (d, *J* = 7.4 Hz, 1H), 4.71 – 4.31 (m, 2H), 3.90 – 3.67 (m, 4H), 3.64 – 3.53 (m, 2H), 3.35 – 3.17 (m, 4H), 1.96 – 1.85 (m, 1H), 0.92 (d, *J* = 6.7 Hz, 6H); <sup>13</sup>C NMR (101 MHz, CDCl<sub>3</sub>) δ 169.9, 136.0, 135.0, 129.3, 129.1, 127.7, 126.1, 78.3, 70.6, 67.0, 47.8, 42.1, 28.6, 19.6. <sup>1</sup>H NMR was taken at rt and shows a mixture of rotamers.

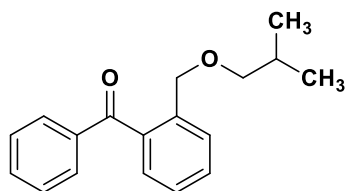

**(2-(isobutoxymethyl)phenyl)(phenyl)methanone (71)** was synthesized according to General Procedure E using **70** (0.250 g, 0.901 mmol), 1.9 M phenyllithium solution in dibutyl ether (0.95 mL, 1.8 mmol), and THF (9 mL). The crude product was purified using flash column chromatography (99:1 to 98:2, hexanes:EtOAc) affording **71** as a yellow oil (0.200 g, 83%). <sup>1</sup>H NMR (400 MHz, CDCl<sub>3</sub>) δ 7.80 (d, *J* = 7.9 Hz, 2H), 7.60 – 7.53 (m, 2H), 7.52 – 7.41 (m, 3H), 7.39 – 7.30 (m, 2H), 4.58 (s, 2H), 3.11 (d, *J* = 6.6 Hz, 2H), 1.77 – 1.65 (m, 1H), 0.77 (d, *J* = 6.7 Hz, 6H); <sup>13</sup>C NMR (101 MHz, CDCl<sub>3</sub>) δ 198.0, 138.6, 137.8, 137.8, 133.1, 130.5, 130.3, 128.8, 128.5, 128.4, 126.9, 78.0, 70.7, 28.5, 19.4; AMM (ESI) *m/z* calcd for C<sub>18</sub>H<sub>21</sub>O<sub>2</sub><sup>+</sup> [M+H]<sup>+</sup> 269.1536, found 269.1532.

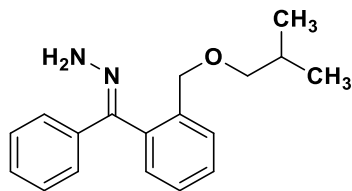

**((2-(isobutoxymethyl)phenyl)(phenyl)methylene)hydrazine (14e)** was synthesized according to General Procedure O using **71** (0.184 g, 0.684 mmol), hydrazine (0.22 mL, 6.8 mmol), acetic acid (0.05 mL, 0.8 mmol), and anhydrous ethanol (6.8 mL). The crude product was purified using flash column chromatography (99:1 to 90:10, hexanes:EtOAc) affording **14e** as an orange oil (0.145 g, 75%). <sup>1</sup>H NMR (400 MHz, CDCl<sub>3</sub>) δ 7.67 (d, *J* = 7.7 Hz, 1H), 7.53 – 7.39 (m, 4H), 7.32 – 7.26 (m, 3H), 7.16 (d, *J* = 7.3 Hz, 1H), 5.36 (s, 2H), 4.32 (d, *J* = 12.4 Hz, 1H), 4.25 (d, *J* = 12.4 Hz, 1H), 3.14 (d, *J* = 6.6 Hz, 2H), 1.85 – 1.72 (m, 1H), 0.85 (d, *J* = 6.6 Hz, 6H).

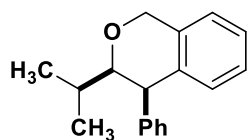

**(3R,4R)-3-isopropyl-4-phenylisochromane (15e)** was synthesized according to General Procedure R using **14e** (0.050 g, 0.18 mmol), manganese (IV) oxide (0.123 g, 1.42 mmol), Rh<sub>2</sub>(*R*-PTAD)<sub>4</sub> (0.003 g, 0.002 mmol), and CH<sub>3</sub>CN (12 mL). The crude product was purified using flash column chromatography (80:20 to 70:30, hexanes:CH<sub>2</sub>Cl<sub>2</sub>) affording **15e** as white crystals (0.027 g, 62%, >95:5 dr, 96:4 er). <sup>1</sup>H NMR (400 MHz, CDCl<sub>3</sub>) δ 7.31 (d, *J* = 7.1 Hz, 2H), 7.27 – 7.19 (m, 2H), 7.20 – 7.10 (m, 2H), 7.07 (t, *J* = 6.7 Hz, 2H), 7.02 (d, *J* = 7.5 Hz, 1H), 5.07 (d, *J* = 15.1 Hz, 1H), 4.89 (d, *J* = 15.2 Hz, 1H), 3.96 (d, *J* = 2.6 Hz, 1H), 3.37 (dd, *J* = 9.9, 2.9 Hz, 1H), 1.45 – 1.31 (m, 1H), 0.98 (d, *J* = 6.5 Hz, 3H), 0.92 (d, *J* = 6.6 Hz, 3H); <sup>13</sup>C NMR (101 MHz, CDCl<sub>3</sub>) δ 142.5, 138.2, 134.2, 130.3, 129.9, 128.2, 126.8, 126.4, 126.3, 124.2, 84.6, 69.2, 46.0, 30.2, 19.8, 18.8; AMM (CI-TOF) *m/z* calcd for C<sub>18</sub>H<sub>24</sub>NO<sup>+</sup> [M+NH<sub>4</sub>]<sup>+</sup> 270.1852, found 270.1852; m.p. 100-104 °C; [α]<sub>D</sub><sup>22</sup> = –36.3 (c = 0.2, CHCl<sub>3</sub>).

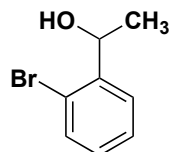

**1-(2-bromophenyl)ethan-1-ol (72)** was synthesized according to the General Procedure K using 1-(2-bromophenyl)ethan-1-one (0.995 g, 5.00 mmol), NaBH<sub>4</sub> (0.757 g, 20.0 mmol) in EtOH (20 mL, 0.25 M). The crude product was purified by flash column chromatography (91:9, hexanes:EtOAc) affording **72** as a clear oil (0.924 g, 92%). <sup>1</sup>H NMR (400 MHz, CDCl<sub>3</sub>) δ 7.60 (d, *J* = 7.7 Hz, 1H), 7.51 (d, *J* = 8.0 Hz, 1H), 7.39 – 7.30 (m, 1H), 7.17 – 7.08 (m, 1H), 5.25 (q, *J* = 6.4 Hz, 1H), 1.97 (s, 1H), 1.49 (d, *J* = 6.4 Hz, 3H). <sup>1</sup>H NMR data of the crude material was consistent with the reported literature values.<sup>15</sup>

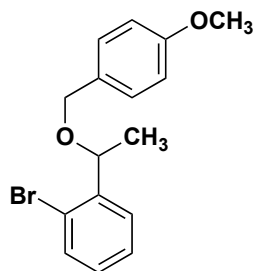

**1-bromo-2-(1-((4-methoxybenzyl)oxy)ethyl)benzene (73)** was synthesized according to the General Procedure L using **72** (0.608 g, 3.02 mmol), 1-(chloromethyl)-4-methoxybenzene (0.45 mL, 3.3 mmol), 60% NaH in mineral oil (0.300 g, 7.50 mmol), TBAI (0.111 g, 0.301 mmol) in THF (20 mL) and DMF (2 mL). The crude product was purified by flash column chromatography (91:9, hexanes:EtOAc) affording **73** as a clear oil (1.000 g, 100%). <sup>1</sup>H NMR (400 MHz, CDCl<sub>3</sub>) δ 7.59 (d, *J* = 7.7 Hz, 1H), 7.53 (d, *J* = 8.0 Hz, 1H), 7.41 – 7.32 (m, 1H), 7.25 (d, *J* = 8.3 Hz, 2H), 7.19 – 7.10 (m, 1H), 6.88 (d, *J* = 8.3 Hz, 2H), 4.90 (q, *J* = 6.4 Hz, 1H), 4.38 (d, *J* = 11.2 Hz, 1H), 4.25 (d, *J* = 11.2 Hz, 1H), 3.81 (s, 3H), 1.42 (d, *J* = 6.4 Hz, 3H). <sup>1</sup>H NMR data of the crude material was consistent with the reported literature values.<sup>16</sup>

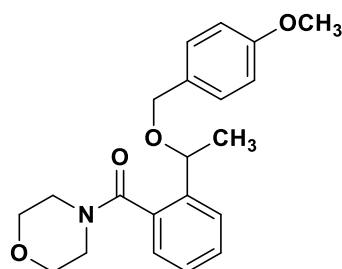

**(2-(1-((4-methoxybenzyl)oxy)ethyl)phenyl)(morpholino)methanone (74)** was synthesized according to General Procedure D using **73** (0.964 mg, 3.00 mmol), morpholine (0.39 mL, 4.5 mmol), Pd(OAc)<sub>2</sub> (0.017 g, 0.0757 mmol), Xantphos (0.087 g, 0.15 mmol) and potassium phosphate tribasic (1.91 g, 9.00 mmol) in toluene (6 mL, 0.5 M). The crude product was purified by flash column chromatography (67:33, hexanes:EtOAc) affording **74** as a pale yellow oil (0.769 g, 72%). <sup>1</sup>H NMR (400 MHz, CDCl<sub>3</sub>) δ 7.69 – 7.62 (m, 1H), 7.49 – 7.40 (m, 1H), 7.34 – 7.27 (m, 1H), 7.24 (d, *J* = 8.2 Hz, 2H), 7.15 (d, *J* = 7.6 Hz, 1H), 6.86 (d, *J* = 7.9 Hz, 2H), 4.84 – 4.50 (m, 1H), 4.38 – 4.24 (m, 2H), 3.92 – 3.40 (m, 9H), 3.37 – 3.06 (m, 2H), 1.56 – 1.34 (m, 3H). <sup>13</sup>C NMR (101 MHz, CDCl<sub>3</sub>) δ 169.5, 159.2, 159.1, 141.4, 134.5, 134.2, 130.8, 130.3, 129.7, 129.4, 129.1, 127.4, 126.7, 126.4, 125.7, 113.9, 113.7, 77.3, 74.4, 73.5, 70.4, 66.9, 66.8, 55.3, 47.6, 42.0, 24.0, 23.4. AMM (ESI) *m/z* calcd for C<sub>21</sub>H<sub>26</sub>NO<sub>4</sub><sup>+</sup> [M+H]<sup>+</sup> 356.1856, found 356.1861. <sup>1</sup>H NMR was taken at rt and shows a mixture of rotamers. IR (neat): ν<sub>max</sub> 1633, 1514, 1250, 1114 cm<sup>-1</sup>.

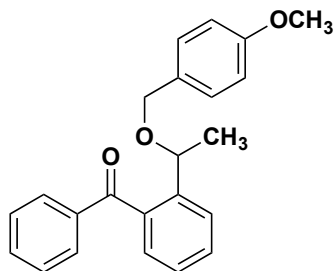



**(2-(1-((4-methoxybenzyl)oxy)ethyl)phenyl)(phenyl)methanone (75)** was synthesized according to General Procedure F using **74** (0.340 g, 0.957 mmol), phenyllithium (1.9 M in Bu<sub>2</sub>O, 1.0 mL, 1.9 mmol) in THF (10 mL, 0.1 M). The crude product was purified by flash column chromatography (91:9, hexanes:EtOAc) affording **75** as a clear oil (0.294 g, 88%). <sup>1</sup>H NMR (400 MHz, CDCl<sub>3</sub>) δ 7.81 (d, *J* = 7.7 Hz, 2H), 7.75 (d, *J* = 7.9 Hz, 1H), 7.63 – 7.52 (m, 2H), 7.50 – 7.41 (m, 2H), 7.37 – 7.28 (m, 2H), 7.10 (d, *J* = 8.3 Hz, 2H), 6.76 (d, *J* = 8.5 Hz, 2H), 4.73 (q, *J* = 6.4 Hz, 1H), 4.28 (d, *J* = 11.1 Hz, 1H), 4.15 (d, *J* = 11.1 Hz, 1H), 3.76 (s, 3H), 1.46 (d, *J* = 6.4 Hz, 3H). <sup>13</sup>C NMR (101 MHz, CDCl<sub>3</sub>) δ 198.0, 159.0, 143.6, 137.9, 137.7, 133.3, 130.7, 130.4, 130.3, 129.3, 128.4, 128.0, 126.6, 126.5, 113.7, 73.6, 70.4, 55.2, 24.0. AMM (ESI) *m/z* calcd for C<sub>23</sub>H<sub>22</sub>NaO<sub>3</sub><sup>+</sup> [M+Na]<sup>+</sup> 369.1467, found 369.1469.

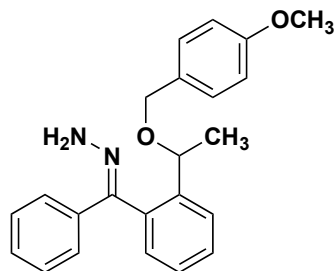

**((2-(1-((4-methoxybenzyl)oxy)ethyl)phenyl)(phenyl)methylene)hydrazine (16a)** was synthesized according to General Procedure O using **75** (0.144 g, 0.415 mmol), hydrazine (0.17 mL, 5.4 mmol), acetic acid (0.03 mL, 0.5 mmol), and EtOH (3 mL) at 160 °C for 3 h. The crude product was purified by flash column chromatography (91:9 to 84:16, hexanes:EtOAc) affording **16a** as a clear oil (0.106 g, 71%). Compound was isolated as a mixture of isomers; <sup>1</sup>H NMR spectral data for this mixture is complex and the mixture was carried on to the next step.

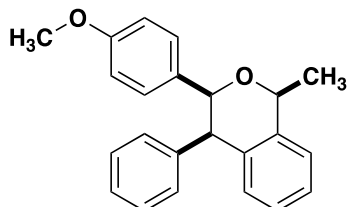

**3-(4-methoxyphenyl)-1-methyl-4-phenylisochromane (17a)** was synthesized according to General Procedure R using **16a** (0.031 g, 0.085 mmol), MnO<sub>2</sub> (0.059 g, 0.68 mmol), and Rh<sub>2</sub>(mes)<sub>4</sub> (0.001 g, 0.0008 mmol) in CH<sub>3</sub>CN (5 mL, 0.017 M). The crude product was purified by flash column chromatography (97:3, hexanes:EtOAc) affording **17a** as a clear oil (0.017 g, 60%, >95:5:Σ other isomers dr). <sup>1</sup>H NMR (599 MHz, CDCl<sub>3</sub>) δ 7.21 – 7.17 (m, 3H), 7.12 – 7.06 (m, 1H), 7.00 – 6.94 (m, 4H), 6.81 (d, *J* = 8.3 Hz, 2H), 6.72 – 6.67 (m, 2H), 6.61 (d, *J* = 8.5 Hz, 2H), 5.09 (q, *J* = 6.5 Hz, 1H), 5.00 (d, *J* = 3.1 Hz, 1H), 4.01 (d, *J* = 3.2 Hz, 1H), 3.66 (s, 3H), 1.71 (d, *J* = 6.5 Hz, 3H). <sup>13</sup>C NMR (151 MHz, CDCl<sub>3</sub>) δ 158.6, 140.9, 139.4, 137.4, 132.9, 130.5, 130.3, 127.4, 127.4, 126.90, 126.87, 126.1, 124.6, 113.1, 79.2, 74.4, 55.3, 51.2, 22.4. Low-resolution MS (Advion ASAP-APCI) *m/z* calcd for C<sub>23</sub>H<sub>23</sub>O<sub>2</sub><sup>+</sup> [M+H]<sup>+</sup> 331.1693, found 331.0.

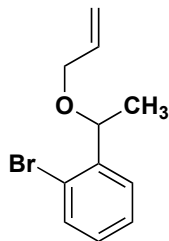

**1-(1-(allyloxy)ethyl)-2-bromobenzene (76)** was synthesized according to the General Procedure L using **72** (0.468 g, 2.33 mmol), 3-bromoprop-1-ene (0.3 mL, 3 mmol), 60% NaH in mineral oil (0.23 g, 5.8 mmol) in THF (10 mL) and DMF (1 mL). The crude product was purified using flash column chromatography (91:9, hexanes:EtOAc) affording **76** as a clear oil (0.481 g, 87%). <sup>1</sup>H NMR (600 MHz, CDCl<sub>3</sub>) δ 7.56 – 7.48 (m, 2H), 7.34 (t, *J* = 7.6 Hz, 1H), 7.16 – 7.09 (m, 1H), 5.97 – 5.87 (m, 1H), 5.27 (d, *J* = 17.2 Hz, 1H), 5.18 (d, *J* = 10.4 Hz, 1H), 4.87 (q, *J* = 6.4 Hz, 1H), 3.91 (dd, *J* = 12.7, 5.2 Hz, 1H), 3.82 (dd, *J* = 12.7, 5.9 Hz, 1H), 1.42 (d, *J* = 6.4 Hz, 3H); <sup>13</sup>C NMR (151 MHz, CDCl<sub>3</sub>) δ 143.0, 134.8, 132.7, 128.8, 128.0, 127.3, 122.6, 117.1, 76.0, 69.9, 22.9; Low-resolution MS (Advion ASAP-APCI) *m/z* calcd for C<sub>11</sub>H<sub>14</sub>BrO<sup>+</sup> [M+H]<sup>+</sup> 241.0223, found 240.9.

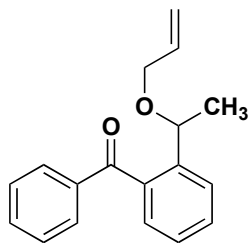

**(2-(1-(allyloxy)ethyl)phenyl)(phenyl)methanone (77)** was synthesized according to the General Procedure J using **76** (0.241 g, 1.00 mmol), **31** (0.165 g, 1.00 mmol), 2.13 M *n*-butyllithium in hexanes (0.52 mL, 1.1 mmol) and THF (20 mL). The crude product was purified using flash column chromatography (95:5, hexanes:EtOAc) affording **77** as a clear oil (0.109 g, 41%). <sup>1</sup>H NMR (600 MHz, CDCl<sub>3</sub>) δ 7.81 (d, *J* = 7.6 Hz, 2H), 7.69 (d, *J* = 7.9 Hz, 1H), 7.60 (t, *J* = 7.7 Hz, 1H), 7.53 (t, *J* = 7.6 Hz, 1H), 7.46 (t, *J* = 7.6 Hz, 2H), 7.33 (t, *J* = 7.4 Hz, 1H), 7.29 (d, *J* = 7.8 Hz, 1H), 5.81 – 5.71 (m, 1H), 5.12 (d, *J* = 17.2 Hz, 1H), 5.04 (d, *J* = 10.4 Hz, 1H), 4.68 (q, *J* = 6.4 Hz, 1H), 3.81 (dd, *J* = 12.7, 5.0 Hz, 1H), 3.73 (dd, *J* = 13.1, 6.2 Hz, 1H), 1.46 (d, *J* = 6.3 Hz, 3H); <sup>13</sup>C NMR (101 MHz, CDCl<sub>3</sub>) δ 198.2, 143.7, 137.9, 137.8, 134.8, 133.4, 130.8, 130.4, 128.6, 128.1, 126.7, 126.6, 116.9, 73.8, 69.9, 24.0; AMM (ESI) *m/z* calcd for C<sub>18</sub>H<sub>19</sub>O<sub>2</sub><sup>+</sup> [M+H]<sup>+</sup> 267.1385, found 267.1374.

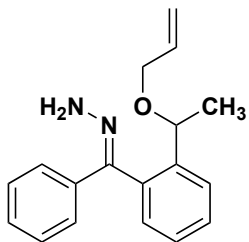

**((2-(1-(allyloxy)ethyl)phenyl)(phenyl)methylene)hydrazine (16b)** was synthesized according to General Procedure O using **77** (0.053 g, 0.20 mmol), hydrazine (0.080 mL, 2.6 mmol), acetic acid (0.014 mL, 0.24 mmol), and EtOH (2

mL) at 160 °C for 3 h. The crude product was purified by flash column chromatography (91:9 to 84:16, hexanes:EtOAc) affording **16b** as a clear oil (0.029 g, 51%). Compound was isolated as a mixture of isomers; <sup>1</sup>H NMR spectral data for this mixture is complex and the mixture was carried on to the next step.

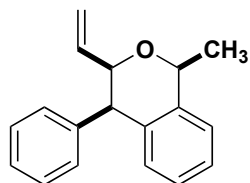

**(1S,3R,4R)-1-methyl-4-phenyl-3-vinylisochromane (17b)** was synthesized according to General Procedure R using **16b** (0.037 g, 0.13 mmol), MnO<sub>2</sub> (0.091 g, 1.0 mmol), and Rh<sub>2</sub>(*R*-TCPTTL)<sub>4</sub> (0.003 g, 0.001 mmol) in CH<sub>3</sub>CN (7.7 mL). The crude product was purified using flash column chromatography (99:1, hexanes:EtOAc) affording **17b** as a clear oil (0.025 g, 76%, >95:Σ other isomers dr). <sup>1</sup>H NMR (400 MHz, CDCl<sub>3</sub>) δ 7.24 – 7.12 (m, 8H), 7.01 (d, *J* = 7.7 Hz, 1H), 5.56 – 5.45 (m, 1H), 5.25 (d, *J* = 17.3 Hz, 1H), 5.10 – 5.00 (m, 2H), 4.51 – 4.45 (m, 1H), 3.95 – 3.89 (m, 1H), 1.72 (d, *J* = 6.5 Hz, 3H); <sup>13</sup>C NMR (151 MHz, CDCl<sub>3</sub>) δ 141.6, 139.0, 137.3, 137.1, 130.3, 130.2, 127.9, 126.9, 126.8, 126.5, 124.5, 116.4, 78.8, 73.6, 49.5, 22.2; AMM (CI) *m/z* calcd for C<sub>18</sub>H<sub>18</sub>O<sup>+</sup> [M+H]<sup>+</sup> 250.1358, found 250.1359; IR (neat): ν<sub>max</sub> 1490, 1451, 1098, 722, 698 cm<sup>-1</sup>.

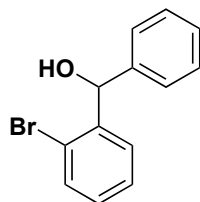

**(2-bromophenyl)(phenyl)methanol (78)** To a flame-dried flask was added 2-bromobenzaldehyde (0.92 g, 5.0 mmol) and Et<sub>2</sub>O (15 mL). Phenylmagnesium bromide (1.0 M in THF) (7.5 mL, 7.5 mmol) was then added dropwise at 0 °C. The reaction was allowed to warm to rt overnight. Upon completion by TLC, the reaction was quenched with sat. aq. NH<sub>4</sub>Cl (10 mL) and the crude mixture was extracted with Et<sub>2</sub>O (3 X 10 mL). The combined organic layers were washed with H<sub>2</sub>O (1 X 10 mL) and brine (1 X 10 mL). The organic layer was dried over Na<sub>2</sub>SO<sub>4</sub>, filtered, and concentrated *in vacuo*. The crude reaction mixture was purified using flash column chromatography (91:9, hexanes:EtOAc), affording **78** as a clear oil (1.3 g, 100%). <sup>1</sup>H NMR (400 MHz, CDCl<sub>3</sub>) δ 7.58 (d, *J* = 7.7 Hz, 1H), 7.54 (d, *J* = 8.0 Hz, 1H), 7.41 (d, *J* = 7.5 Hz, 2H), 7.34 (t, *J* = 7.3 Hz, 3H), 7.29 (d, *J* = 7.3 Hz, 1H), 7.15 (t, *J* = 7.6 Hz, 1H), 6.21 (d, *J* = 3.5 Hz, 1H), 2.35 (d, *J* = 3.8 Hz, 1H). <sup>1</sup>H NMR data of the crude material was consistent with the reported literature values.<sup>17</sup>

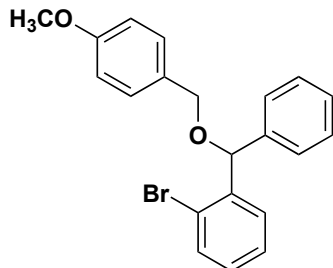

**1-bromo-2-(((4-methoxybenzyl)oxy)(phenyl)methyl)benzene (79)** was synthesized according to the General Procedure L using **78** (0.789 g, 3.00 mmol), 1-(chloromethyl)-4-methoxybenzene (0.45 mL, 3.3 mmol), 60% NaH in mineral oil (0.300 g, 7.50 mmol), TBAI (0.111 g, 0.301 mmol) in THF (20 mL) and DMF (2 mL). The crude product was purified using flash column chromatography (95:5, hexanes:EtOAc) affording **79** as a clear oil (1.17 g, 100%). <sup>1</sup>H NMR (400 MHz, CDCl<sub>3</sub>) δ 7.60 (dd, *J* = 7.9, 1.7 Hz, 1H), 7.53 (d, *J* = 8.0 Hz, 1H), 7.40 (d, *J* = 7.6 Hz, 2H), 7.36 – 7.20 (m, 6H), 7.12 (td, *J* = 7.7, 1.7 Hz, 1H), 6.87 (d, *J* = 8.6 Hz, 2H), 5.86 (s, 1H), 4.51 (d, *J* = 11.3 Hz, 1H), 4.43 (d, *J* = 11.2 Hz, 1H), 3.79 (s, 3H); <sup>13</sup>C NMR (101 MHz, CDCl<sub>3</sub>) δ 159.4, 141.3, 140.9, 132.9, 130.3, 129.7, 129.1, 129.0, 128.4, 127.9, 127.7, 127.6, 123.8, 113.9, 80.8, 70.8, 55.4; AMM (CI) *m/z* calcd for C<sub>21</sub>H<sub>19</sub>BrO<sub>2</sub><sup>+</sup> [M]<sup>+</sup> 382.0569, found 382.0564.

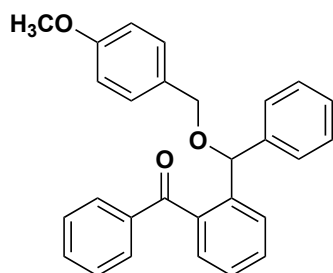

**(2-(1-(((4-methoxybenzyl)oxy)ethyl)phenyl)(phenyl)methanone (80)** was synthesized according to the General Procedure J using **79** (0.387 g, 1.01 mmol), **31** (0.165 g, 1.00 mmol), 2.13 M *n*-butyllithium in hexane (0.52 mL, 1.1 mmol) and THF (15 mL). The crude product was purified using flash column chromatography (95:5, hexanes:EtOAc) affording **80** as a clear oil (0.23 g, 56%). <sup>1</sup>H NMR (400 MHz, CDCl<sub>3</sub>) δ 7.73 (d, *J* = 7.7 Hz, 2H), 7.54 (t, *J* = 7.5 Hz, 1H), 7.43 – 7.20 (m, 11H), 6.96 (d, *J* = 8.5 Hz, 2H), 6.68 (d, *J* = 8.6 Hz, 2H), 5.86 (s, 1H), 4.29 (d, *J* = 10.8 Hz, 1H), 4.23 (d, *J* = 10.8 Hz, 1H), 3.74 (s, 3H); <sup>13</sup>C NMR (101 MHz, CDCl<sub>3</sub>) δ 198.3, 159.1, 141.7, 141.0, 138.7, 137.8, 133.2, 130.4, 130.2, 130.2, 129.5, 128.5, 128.4, 128.1, 128.0, 128.0, 127.7, 126.8, 113.6, 79.0, 71.0, 55.4; Low-resolution MS (Advion ASAP-APCI) *m/z* calcd for C<sub>28</sub>H<sub>25</sub>O<sub>3</sub><sup>+</sup> [M+H]<sup>+</sup> 409.1798, found 409.0.

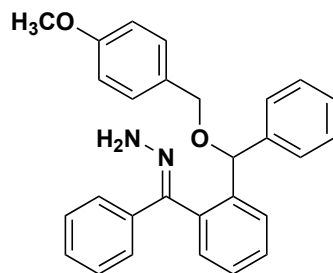

**((2-(((4-methoxybenzyl)oxy)(phenyl)methyl)phenyl)(phenyl)methylene)hydrazine (16c)** was synthesized according to General Procedure O **80** (0.123 g, 0.300 mmol), hydrazine (0.12 mL, 3.9 mmol), acetic acid (0.021 mL, 0.36 mmol), and anhydrous EtOH (3 mL) were heated in a microwave reactor at 160 °C for 3 h. After cooling down to room temperature, hydrazine (0.12 mL, 3.9 mmol) and acetic acid (0.021 mL, 0.36 mmol) were added again and the mixture was heated in a microwave reactor at 160 °C for another 3 hours. The crude product was purified by flash column chromatography (91:9 to 84:16, hexanes:EtOAc) affording **16c** as a clear oil (0.088 g, 69%). Compound was isolated as a mixture of isomers; <sup>1</sup>HNMR spectral data for this mixture is complex and the mixture was carried on to the next step.

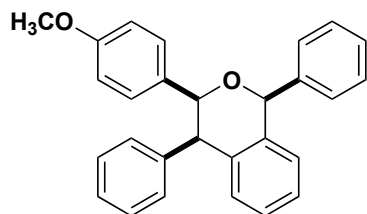

**(1S,3S,4R)-3-(4-methoxyphenyl)-1,4-diphenylisochromane (17c)** was synthesized according to General Procedure R using **16c** (0.037 g, 0.087 mmol), MnO<sub>2</sub> (0.060 g, 0.69 mmol), and Rh<sub>2</sub>(*R*-TCPTTL)<sub>4</sub> (0.002 g, 0.0009 mmol) in CH<sub>3</sub>CN (5.1 mL). The crude product was purified using flash column chromatography (99:1, hexanes:EtOAc), affording **17c** as a white solid (0.024 g, 70%, >95:Σ other isomers). <sup>1</sup>H NMR (600 MHz, CDCl<sub>3</sub>) δ 7.58 (d, *J* = 7.6 Hz, 2H), 7.47 – 7.41 (m, 2H), 7.41 – 7.35 (m, 1H), 7.18 – 7.11 (m, 2H), 7.10 – 7.01 (m, 4H), 6.96 – 6.83 (m, 5H), 6.66 (d, *J* = 8.7 Hz, 2H), 5.98 (s, 1H), 5.31 (d, *J* = 3.6 Hz, 1H), 4.24 (d, *J* = 3.6 Hz, 1H), 3.72 (s, 3H); <sup>13</sup>C NMR (201 MHz, CDCl<sub>3</sub>) δ 158.6, 141.8, 141.3, 137.8, 137.5, 132.7, 130.5, 130.5, 129.1, 128.7, 128.4, 127.5, 127.4, 127.2, 126.7, 126.5, 126.2, 113.1, 82.4, 80.3, 55.3, 50.8; m.p. 157-158 °C; AMM (ESI) *m/z* calcd for C<sub>28</sub>H<sub>25</sub>O<sub>2</sub><sup>+</sup> [M+Na]<sup>+</sup> 415.1674, found 415.1676; IR (neat): ν<sub>max</sub> 1516, 1252, 1033, 706 cm<sup>-1</sup>.

#### TETRAHYDROISOQUINOLINES

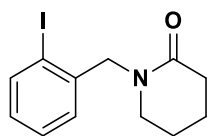

**1-(2-iodobenzyl)piperidin-2-one (81)** was synthesized according to General Procedure B using NaH (0.309 g, 7.56 mmol) in THF (7.5 mL), 2-piperidinone (0.500 g, 5.04 mmol) in THF (7.5 mL), and **58** (1.645 g, 5.540 mmol). After addition of the **58** the reaction was stirred overnight at rt. The crude product was purified using flash column chromatography (30:70, hexanes:EtOAc) affording **81** as a clear oil (1.585 g, 99%). <sup>1</sup>H NMR (600 MHz, CDCl<sub>3</sub>) δ 7.83 (d, *J* = 7.8 Hz, 1H), 7.32 (t, *J* = 7.5 Hz, 1H), 7.14 (d, *J* = 7.6 Hz, 1H), 6.96 (t, *J* = 7.6 Hz, 1H), 4.66 (s, 2H), 3.23 (t, *J* = 5.8 Hz, 2H), 2.51 (t, *J* = 6.4 Hz, 2H), 1.89 – 1.78 (m, 4H); <sup>13</sup>C NMR (151 MHz, CDCl<sub>3</sub>) δ 170.2, 139.6, 139.0, 129.1, 128.7, 128.0, 99.1, 54.9, 47.9, 32.6, 23.4, 21.5. AMM (ESI) *m/z* calcd for C<sub>12</sub>H<sub>15</sub>INO<sup>+</sup> [M+H]<sup>+</sup> 316.0193, found 316.0192.

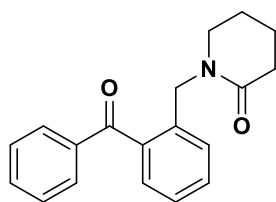

**1-(2-benzoylbenzyl)piperidin-2-one (82)** was synthesized according to General Procedure N using **81** (0.600 g, 1.90 mmol), benzaldehyde (1.55 mL, 15.2 mmol), palladium (II) acetate (0.021 g, 0.095 mmol), silver (I) oxide (0.533 g, 2.30 mmol), and 70% *tert*-butyl hydroperoxide in H<sub>2</sub>O (1.29 mL, 9.5 mmol). The crude product was purified using flash column chromatography (20:80, hexanes:EtOAc) affording **82** as a pink oil (0.325 g, 58%). <sup>1</sup>H NMR (600 MHz, CDCl<sub>3</sub>) δ 7.84 – 7.78 (m, 2H), 7.63 – 7.57 (m, 1H), 7.51 – 7.44 (m, 3H), 7.41 (d, *J* = 7.8 Hz, 1H), 7.36 – 7.31 (m, 2H),

4.66 (s, 2H), 3.17 (t,  $J = 5.7$  Hz, 2H), 2.35 (t,  $J = 6.3$  Hz, 2H), 1.76 – 1.66 (m, 4H);  $^{13}\text{C}$  NMR (151 MHz,  $\text{CDCl}_3$ )  $\delta$  198.1, 170.3, 138.5, 137.6, 136.8, 133.6, 130.8, 130.3, 128.7, 128.7, 128.7, 126.7, 48.0, 47.7, 32.5, 23.2, 21.4; AMM (ESI)  $m/z$  calcd for  $\text{C}_{19}\text{H}_{20}\text{NO}_2^+$   $[\text{M}+\text{H}]^+$  294.1489, found 294.1485.

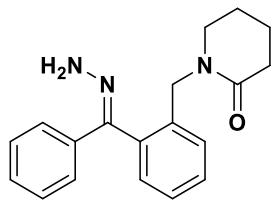

**1-(2-(hydrazineylidene(phenyl)methyl)benzyl)piperidin-2-one (22a)** was synthesized according to General Procedure P using **82** (0.168 g, 0.573 mmol), hydrazine (0.18 mL, 5.7 mmol), acetic acid (0.02 mL, 0.3 mmol), and ethanol (5.7 mL). The reaction was heated at 80 °C for 3 days. The crude product was purified using flash column chromatography (100% EtOAc) affording **22a** as a white foam (0.107 g, 61%).  $^1\text{H}$  NMR (400 MHz,  $\text{CDCl}_3$ )  $\delta$  7.52 – 7.32 (m, 5H), 7.33 – 7.21 (m, 3H), 7.15 (d,  $J = 7.1$  Hz, 1H), 5.44 (s, 2H), 4.48 (d,  $J = 15.4$  Hz, 1H), 4.32 (d,  $J = 15.3$  Hz, 1H), 3.24 – 2.94 (m, 2H), 2.46 – 2.26 (m, 2H), 1.83 – 1.57 (m, 4H).

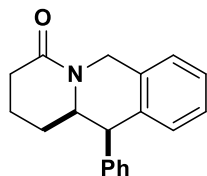

**(11R,11aR)-11-phenyl-1,2,3,6,11,11a-hexahydro-4H-pyrido[1,2-b]isoquinolin-4-one (23a)** was synthesized according to General Procedure S using **22a** (0.072 g, 0.23 mmol),  $\text{MnO}_2$  (0.162 g, 1.86 mmol),  $\text{Rh}_2(\text{R-PTAD})_4$  (0.003 g, 0.002 mmol), and  $\text{CH}_2\text{Cl}_2$  (16 mL). The oxidation was conducted in  $\text{CH}_2\text{Cl}_2$  (2 mL) for 5 h at which time the  $\text{MnO}_2$  was filtered off and the resulting diazo was diluted with  $\text{CH}_2\text{Cl}_2$  to 16 mL. The catalyst was added to the solution at -20 °C and the reaction was left at -20 °C until the fuchsia color of the diazo was gone and the solution was a pale green (30 min). The crude product was purified using flash column chromatography (97:3,  $\text{CH}_2\text{Cl}_2$ :MeOH) affording **23a** as white crystals (0.035 g, 54%, >95:5 dr, 99:1 er).  $^1\text{H}$  NMR (600 MHz,  $\text{CDCl}_3$ )  $\delta$  7.29 – 7.19 (m, 5H), 7.12 (t,  $J = 7.4$  Hz, 1H), 7.07 – 6.97 (m, 3H), 5.56 (d,  $J = 18.2$  Hz, 1H), 4.41 (d,  $J = 18.2$  Hz, 1H), 4.03 – 3.95 (m, 2H), 2.31 (dt,  $J = 17.2, 5.4$  Hz, 1H), 2.06 – 1.95 (m, 2H), 1.59 – 1.45 (m, 2H), 1.28 – 1.18 (m, 1H);  $^{13}\text{C}$  NMR (151 MHz,  $(\text{CD}_3)_2\text{CO}$ )  $\delta$  170.3, 142.8, 138.8, 133.2, 130.4, 130.2, 129.0, 127.6, 127.5, 127.4, 127.2, 56.7, 51.6, 45.7, 33.2, 27.5, 19.1.; AMM (ESI)  $m/z$  calcd for  $\text{C}_{19}\text{H}_{20}\text{NO}^+$   $[\text{M}+\text{H}]^+$  278.1539, found 278.1544; m.p. 125.129 °C ;  $[\alpha]_D^{20} = -193.2$  (c = 0.25,  $\text{CHCl}_3$ ).

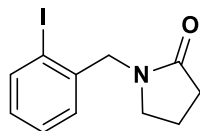

**1-(2-iodobenzyl)pyrrolidin-2-one (83)** was synthesized according to General Procedure B, using NaH (0.703 g, 17.2 mmol) THF (5 mL), and 2-pyrrolidinone (1.15 mL, 15.2 mmol) in THF (23 mL) and the reaction was allowed to warm to rt over 2 h. **58** (1.000 g, 10.08 mmol) was added to the mixture and the reaction was stirred at rt overnight. Upon completion by TLC, the reaction was quenched with water (30 mL) and extracted with EtOAc (3 X 40 mL). The

combined organic layers were washed with brine (1 X 30 mL), dried over Na<sub>2</sub>SO<sub>4</sub>, filtered, and concentrated *in vacuo*. The crude product was purified using flash column chromatography (30:70, hexanes:EtOAc) affording **83** as a yellow oil (0.983 g, 33%). <sup>1</sup>H NMR (600 MHz, CDCl<sub>3</sub>) δ 7.84 (d, *J* = 7.9 Hz, 1H), 7.33 (t, *J* = 7.5 Hz, 1H), 7.21 (d, *J* = 7.6 Hz, 1H), 6.98 (t, *J* = 7.6 Hz, 1H), 4.54 (s, 2H), 3.31 (t, *J* = 7.0 Hz, 2H), 2.46 (t, *J* = 8.1 Hz, 2H), 2.08 – 2.00 (m, 2H); <sup>13</sup>C NMR (151 MHz, CDCl<sub>3</sub>) δ 175.3, 139.7, 138.7, 129.4, 128.9, 128.8, 99.0, 51.2, 47.0, 30.8, 18.0; AMM (ESI) *m/z* calcd for C<sub>11</sub>H<sub>13</sub>INO<sup>+</sup> [M+H]<sup>+</sup> 302.0036, found 302.0030.

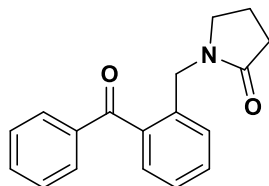

**1-(2-benzoylbenzyl)pyrrolidin-2-one (84)** was synthesized according to General Procedure N using **83** (0.480 g, 1.59 mmol), benzaldehyde (1.29 mL, 12.7 mmol), palladium (II) acetate (0.018 g, 0.080 mmol), silver (I) oxide (0.443 g, 1.91 mmol), and 70% *tert*-butyl hydroperoxide in H<sub>2</sub>O (1.1 mL, 7.9 mmol). The crude product was purified using flash column chromatography (20:80, hexanes:EtOAc) affording **84** as a yellow oil (0.287 g, 65%). <sup>1</sup>H NMR (600 MHz, CDCl<sub>3</sub>) δ 7.83 – 7.77 (m, 2H), 7.63 – 7.57 (m, 1H), 7.51 – 7.44 (m, 3H), 7.42 (d, *J* = 7.7 Hz, 1H), 7.37 – 7.33 (m, 2H), 4.52 (s, 2H), 3.23 (t, *J* = 7.1 Hz, 2H), 2.31 (t, *J* = 8.1 Hz, 2H), 1.92 – 1.81 (m, 2H); <sup>13</sup>C NMR (151 MHz, CDCl<sub>3</sub>) δ 197.6, 175.2, 138.2, 137.3, 136.0, 133.5, 130.7, 130.1, 129.3, 128.7, 128.6, 126.9, 47.0, 43.7, 30.7, 17.7; AMM (ESI) *m/z* calcd for C<sub>18</sub>H<sub>18</sub>NO<sub>2</sub><sup>+</sup> [M+H]<sup>+</sup> 280.1332, found 280.1332.

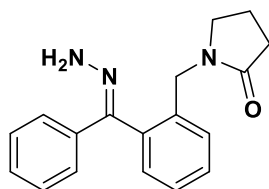

**1-(2-(hydrazineylidene(phenyl)methyl)benzyl)pyrrolidin-2-one (22b)** was synthesized according to General Procedure P using **84** (0.464 g, 1.66 mmol), hydrazine (0.52 mL, 17 mmol), acetic acid (0.05 mL, 0.8 mmol) and ethanol (16 mL). The reaction was heated at 80 °C for 4 d. The crude product was purified using flash column chromatography (100:0 to 0:100, hexanes:EtOAc) affording **22b** as a white foam (0.248 g, 51%). <sup>1</sup>H NMR (600 MHz, CDCl<sub>3</sub>) δ 7.49 – 7.38 (m, 5H), 7.31 – 7.23 (m, 3H), 7.19 – 7.14 (m, 1H), 5.44 (s, 2H), 4.32 – 4.23 (m, 2H), 3.15 (td, *J* = 9.1, 5.8 Hz, 1H), 3.02 (td, *J* = 9.1, 5.6 Hz, 1H), 2.37 – 2.28 (m, 1H), 2.28 – 2.20 (m, 1H), 1.91 – 1.73 (m, 2H); <sup>13</sup>C NMR (151 MHz, CDCl<sub>3</sub>) δ 175.2, 147.3, 137.8, 135.8, 132.1, 129.6, 129.0, 128.8, 128.5, 128.3, 128.2, 125.7, 47.1, 43.9, 30.6, 17.6; AMM (ESI) *m/z* calcd for C<sub>18</sub>H<sub>20</sub>N<sub>3</sub>O<sup>+</sup> [M+H]<sup>+</sup> 294.1601, found 294.1601.

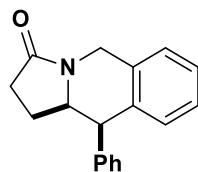

**(10*R*,10*aR*)-10-phenyl-1,5,10,10*a*-tetrahydropyrrolo[1,2-*b*]isoquinolin-3(2*H*)-one (23b)** was synthesized according to General Procedure S using **22b** (0.024 g, 0.082 mmol), MnO<sub>2</sub> (0.059 g, 0.68 mmol), Rh<sub>2</sub>(*R*-PTAD)<sub>4</sub> (0.001 g,

0.0008 mmol), and CH<sub>2</sub>Cl<sub>2</sub> (6 mL). The oxidation was conducted in CH<sub>2</sub>Cl<sub>2</sub> (1 mL) for 2 h at which time the MnO<sub>2</sub> was filtered off and the resulting diazo was diluted with CH<sub>2</sub>Cl<sub>2</sub> to 6 mL. The catalyst was added to the solution at -20 °C and the reaction was left at -20 °C until the fuchsia color of the diazo was gone and the solution was a pale green (1 h). The crude product was purified using flash column chromatography (25:75, hexanes:EtOAc) affording **23b** as a clear oil (0.018 g, 81%, >95:5 dr, 94:6 er). <sup>1</sup>H NMR (600 MHz, CDCl<sub>3</sub>) δ 7.30 – 7.19 (m, 5H), 7.19 – 7.13 (m, 1H), 7.08 (d, *J* = 7.7 Hz, 1H), 6.97 – 6.92 (m, 2H), 5.24 (d, *J* = 17.7 Hz, 1H), 4.39 (d, *J* = 17.7 Hz, 1H), 4.20 – 4.14 (m, 1H), 4.07 (d, *J* = 3.9 Hz, 1H), 2.20 – 2.12 (m, 1H), 2.12 – 2.02 (m, 1H), 1.82 – 1.75 (m, 1H), 1.35 – 1.27 (m, 1H); <sup>13</sup>C NMR (151 MHz, CDCl<sub>3</sub>) δ 174.8, 139.8, 136.7, 131.4, 130.5, 129.3, 128.5, 127.2, 127.1, 127.0, 126.6, 57.1, 49.5, 42.5, 29.5, 21.1; AMM (ESI) *m/z* calcd for C<sub>18</sub>H<sub>18</sub>NO<sup>+</sup> [M+H]<sup>+</sup> 264.1383, found 264.1380; IR (neat): ν<sub>max</sub> 3060, 2925, 1764, 1678, 1284 cm<sup>-1</sup>; [α]<sub>D</sub><sup>22</sup> = -11.3 (c = 0.14, CHCl<sub>3</sub>).

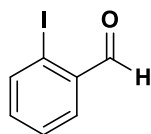

**2-iodobenzaldehyde (85)**. Following a modified literature procedure,<sup>19</sup> 2-iodobenzyl alcohol (2.000 g, 8.546 mmol) and CH<sub>2</sub>Cl<sub>2</sub> (24 mL) were added to a flame-dried round bottom flask under argon. Manganese (IV) oxide (11.154 g, 128.30 mmol) was added to the solution and the mixture was refluxed for 16 h. The mixture was cooled to rt, filtered through Celite, and the filtrate was concentrated *in vacuo* affording **85** as a white solid (1.960 g, 98%) with no purification needed. <sup>1</sup>H NMR (600 MHz, CDCl<sub>3</sub>) δ 10.03 (s, 1H), 7.91 (d, *J* = 7.8 Hz, 1H), 7.84 (d, *J* = 7.4 Hz, 1H), 7.44 (t, *J* = 7.4 Hz, 1H), 7.26 (t, *J* = 7.5 Hz, 1H). <sup>1</sup>H NMR data was consistent with literature values.<sup>19</sup>

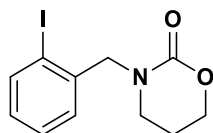

**3-(2-iodobenzyl)-1,3-oxazinan-2-one (86)** was synthesized according to General Procedure B using NaH (0.606 g, 14.8 mmol) in THF (4 mL), 1,3-oxazinan-2-one (1.000 g, 9.891 mmol) in THF (15 mL), and **58** (3.231 g, 10.88 mmol). The crude product was purified using flash column chromatography (100:0 to 30:70, hexanes:EtOAc) affording **86** as white crystals (1.935 g, 62%). <sup>1</sup>H NMR (600 MHz, CDCl<sub>3</sub>) δ 7.82 (dd, *J* = 7.9, 1.3 Hz, 1H), 7.34 (td, *J* = 7.5, 1.3 Hz, 1H), 7.27 – 7.21 (m, 1H), 6.98 (td, *J* = 7.6, 1.8 Hz, 1H), 4.59 (s, 2H), 4.30 (t, *J* = 5.3 Hz, 2H), 3.24 (t, *J* = 6.2 Hz, 2H), 2.09 – 2.01 (m, 2H); <sup>13</sup>C NMR (151 MHz, CDCl<sub>3</sub>) δ 153.7, 139.4, 138.1, 129.1, 128.5, 127.8, 98.6, 66.5, 56.9, 44.8, 22.0; AMM (ESI) *m/z* calcd for C<sub>11</sub>H<sub>13</sub>INO<sub>2</sub><sup>+</sup> [M+H]<sup>+</sup> 317.9985, found 317.9985; m.p. 103-105 °C.

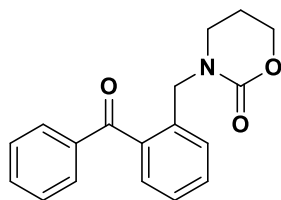

**3-(2-benzoylbenzyl)-1,3-oxazinan-2-one (87)** was synthesized according to General Procedure N using **86** (1.848 g, 5.827 mmol), benzaldehyde (4.7 mL, 46.6 mmol), palladium (II) acetate (0.065 g, 0.29 mmol), silver (I) oxide (1.620 g, 6.992 mmol), and *tert*-butyl hydroperoxide (3.9 mL, 29.1 mmol). The crude product was purified using flash column



chromatography (90:10, CH<sub>2</sub>Cl<sub>2</sub>:CH<sub>3</sub>CN) affording **87** as a pale, yellow oil (0.671 g, 39%). <sup>1</sup>H NMR (600 MHz, CDCl<sub>3</sub>) δ 7.80 (d, *J* = 7.8 Hz, 2H), 7.60 (t, *J* = 7.4 Hz, 1H), 7.55 – 7.42 (m, 4H), 7.40 – 7.32 (m, 2H), 4.63 (s, 2H), 4.12 (t, *J* = 5.3 Hz, 2H), 3.21 (t, *J* = 6.3 Hz, 2H), 1.96 – 1.90 (m, 2H); <sup>13</sup>C NMR (151 MHz, CDCl<sub>3</sub>) δ 197.9, 154.0, 138.2, 137.3, 136.2, 133.5, 130.8, 130.1, 128.7, 128.7, 128.6, 126.8, 66.4, 49.9, 45.2, 22.2; AMM (ESI) *m/z* calcd for C<sub>18</sub>H<sub>18</sub>NO<sub>3</sub><sup>+</sup> [M+H]<sup>+</sup> 296.1281, found 296.1286.

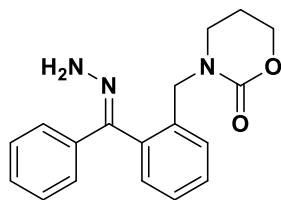

**3-(2-(hydrazineylidene(phenyl)methyl)benzyl)-1,3-oxazinan-2-one (22c)** was synthesized according to General Procedure P using **87** (0.567 g, 1.92 mmol), hydrazine (0.60 mL, 19 mmol), acetic acid (0.05 mL, 0.9 mmol) and ethanol (19 mL). The reaction was heated at 80 °C for 5 d. The crude product was purified using flash column chromatography (20:80, hexanes:EtOAc) affording **22c** as a pale yellow foam (0.322 g, 54%). <sup>1</sup>H NMR (600 MHz, CDCl<sub>3</sub>) δ 7.51 (d, *J* = 7.6 Hz, 1H), 7.49 – 7.39 (m, 4H), 7.34 – 7.25 (m, 3H), 7.15 (d, *J* = 7.4 Hz, 1H), 5.45 (s, 2H), 4.40 (d, *J* = 15.7 Hz, 1H), 4.30 (d, *J* = 15.7 Hz, 1H), 4.16 – 4.03 (m, 2H), 3.13 (dt, *J* = 12.1, 6.2 Hz, 1H), 3.04 (dt, *J* = 12.0, 6.3 Hz, 1H), 1.93 – 1.81 (m, 2H).

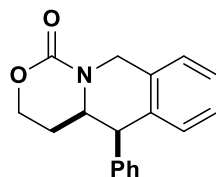

**(4aR,5R)-5-phenyl-4,4a,5,10-tetrahydro-1H,3H-[1,3]oxazino[3,4-b]isoquinolin-1-one (23c)** was synthesized according to General Procedure S using **22c** (0.100 g, 0.323 mmol), MnO<sub>2</sub> (0.224 g, 2.58 mmol), Rh<sub>2</sub>(*R*-PTAD)<sub>4</sub> (0.005 g, 0.003 mmol), and CH<sub>2</sub>Cl<sub>2</sub> (22 mL). The oxidation was conducted in CH<sub>2</sub>Cl<sub>2</sub> (2 mL) for 4 h at which time the MnO<sub>2</sub> was filtered off and the resulting diazo was diluted with CH<sub>2</sub>Cl<sub>2</sub> to 22 mL. The catalyst was added to the solution at -20 °C and the reaction was left at -20 °C until the fuchsia color of the diazo was gone and the solution was a pale green (1-3 h). The crude product was purified using flash column chromatography (95:5, CH<sub>2</sub>Cl<sub>2</sub>:CH<sub>3</sub>CN) affording **23c** as white foam (0.042 g, 52%, >95:5 dr, 99:1 er). **23c** was crystallized out of hexanes:*i*-PrOH (90:10) with a small amount of CH<sub>2</sub>Cl<sub>2</sub> to dissolve fully followed by slow evaporation over 1 h. <sup>1</sup>H NMR (600 MHz, CDCl<sub>3</sub>) δ 7.32 – 7.20 (m, 5H), 7.19 – 7.10 (m, 1H), 7.07 – 7.00 (m, 3H), 5.33 (d, *J* = 17.5 Hz, 1H), 4.54 (d, *J* = 17.5 Hz, 1H), 4.06 – 3.96 (m, 2H), 3.85 (dt, *J* = 10.4, 4.8 Hz, 1H), 3.09 (td, *J* = 10.2, 3.1 Hz, 1H), 2.26 – 2.14 (m, 1H), 1.95 – 1.84 (m, 1H); <sup>13</sup>C NMR (151 MHz, CDCl<sub>3</sub>) δ 154.4, 140.1, 136.6, 131.8, 129.7, 129.6, 128.7, 127.5, 127.3, 127.1, 126.5, 63.2, 53.3, 50.7, 47.5, 25.5; AMM (ESI) *m/z* calcd for C<sub>18</sub>H<sub>18</sub>NO<sub>2</sub><sup>+</sup> [M+H]<sup>+</sup> 280.1332, found 280.1328; [α]<sub>D</sub><sup>22</sup> = -202.3 (c = 0.66, CHCl<sub>3</sub>); m.p. 182-183 °C.

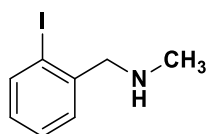

**1-(2-iodophenyl)-N-methylmethanamine (88).** To a flame-dried round bottom flask was added **85** (0.842 g, 3.63 mmol) in anhydrous ethanol (12 mL) and a solution of 33% methylamine in ethanol (5.8 mL, 46 mmol) followed by acetic acid (0.02 mL, 0.4 mmol). The reaction was stirred overnight at rt after which time the reaction was cooled to 0 °C and NaBH<sub>4</sub> (0.272 g, 7.19 mmol) was added. The reaction was stirred for 2 h and then quenched with NaHCO<sub>3</sub> (5 mL) and the mixture was extracted with EtOAc (3 X 30 mL) and the combined organic extracts were dried over Na<sub>2</sub>SO<sub>4</sub>, filtered, and concentrated *in vacuo* affording **88** as a clear oil (0.890 g, 99%) with no purification needed. <sup>1</sup>H NMR (600 MHz, CDCl<sub>3</sub>) δ 7.83 (d, *J* = 7.9 Hz, 1H), 7.36 (d, *J* = 7.3 Hz, 1H), 7.32 (t, *J* = 7.4 Hz, 1H), 6.96 (t, *J* = 7.5 Hz, 1H), 3.77 (s, 2H), 2.46 (s, 3H); <sup>13</sup>C NMR (151 MHz, CDCl<sub>3</sub>) δ 142.1, 139.6, 129.8, 128.9, 128.4, 99.8, 60.3, 36.0; AMM (ESI) *m/z* calcd for C<sub>8</sub>H<sub>11</sub>IN<sup>+</sup> [M+H]<sup>+</sup> 247.9931, found 247.9926.

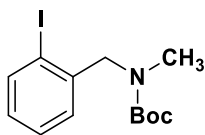

**tert-butyl (2-iodobenzyl)(methyl)carbamate (89).** Following a modified literature procedure,<sup>20</sup> di-*tert*-butyl decarbonate (1.69 mL, 7.34 mmol) was added to a solution of **88** (0.906 g, 3.67 mmol) in THF (24 mL) and the reaction was heated to 40 °C overnight. The reaction was cooled to rt and imidazole (0.500 g, 7.34 mmol) was added and the reaction was stirred for 30 min after which time the reaction was concentrated *in vacuo*. The residue was dissolved in CHCl<sub>3</sub> (50 mL) and washed with 1 M HCl (2 X 25 mL), water (2 X 25 mL), and brine (1 X 25 mL). The organic layer was dried over Na<sub>2</sub>SO<sub>4</sub>, filtered, and concentrated *in vacuo*. The crude product was purified using flash column chromatography (100:0 to 85:15, hexanes:EtOAc) affording **89** as a clear oil (1.092 g, 84%). <sup>1</sup>H NMR (600 MHz, CDCl<sub>3</sub>) δ 7.83 (d, *J* = 7.8 Hz, 1H), 7.34 (t, *J* = 7.5 Hz, 1H), 7.15 – 7.08 (m, 1H), 7.01 – 6.92 (m, 1H), 4.48 (s, 2H), 2.85 (s, 3H), 1.51 (s, 9H). <sup>1</sup>H NMR data was consistent with literature values.<sup>21</sup> <sup>1</sup>H NMR was taken at rt and shows a mixture of rotamers.

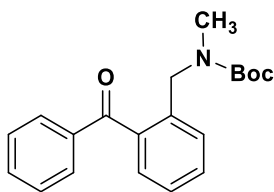

**tert-butyl (2-benzoylbenzyl)(methyl)carbamate (90)** was synthesized according to General Procedure N using **89** (0.500 g, 1.44 mmol), benzaldehyde (1.17 mL, 11.5 mmol), palladium (II) acetate (0.016 g, 0.072 mmol), silver (I) oxide (0.401 g, 1.73 mmol), and 70% *tert*-butyl hydroperoxide in H<sub>2</sub>O (0.97 mL, 7.2 mmol). The crude product was purified using flash column chromatography (90:10, hexanes:EtOAc) affording **90** as a clear oil (0.282 g, 60%). <sup>1</sup>H NMR (600 MHz, CDCl<sub>3</sub>) δ 7.80 (d, *J* = 7.6 Hz, 2H), 7.63 – 7.56 (m, 1H), 7.52 – 7.43 (m, 3H), 7.43 – 7.30 (m, 3H), 4.53 (s, 2H), 2.84 – 2.70 (m, 3H), 1.46 – 1.36 (m, 9H); <sup>13</sup>C NMR (151 MHz, CDCl<sub>3</sub>) δ 198.0, 156.0, 138.1, 137.6, 133.5, 130.8, 130.3, 129.1, 128.8, 128.6, 128.3, 127.5, 126.4, 79.9, 79.7, 50.4, 49.5, 34.5, 28.5, 28.4; AMM (ESI-TOF) *m/z* calcd for C<sub>20</sub>H<sub>23</sub>NNaO<sub>3</sub><sup>+</sup> [M+Na]<sup>+</sup> 348.1570, found 348.1571. NMRs were taken at rt and show a mixture of rotamers.

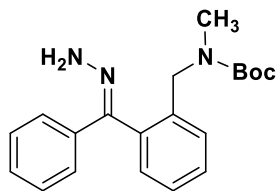

**tert-butyl-(2-(hydrazineylidene(phenyl)methyl)benzyl)(methyl)carbamate (24)** was synthesized according to General Procedure P using **90** (0.282 g, 0.866 mmol), hydrazine (0.27 mL, 8.7 mmol), acetic acid (0.02 mL, 0.4 mmol), and ethanol (9 mL). The reaction was heated for 3 d with incomplete conversion. The crude product was purified using flash column chromatography (80:20, hexanes:EtOAc) affording **24** as a yellow oil (0.171 g, 58%). <sup>1</sup>H NMR (600 MHz, CDCl<sub>3</sub>) δ 7.51 – 7.32 (m, 5H), 7.31 – 7.23 (m, 3H), 7.15 (d, *J* = 7.4 Hz, 1H), 5.40 (s, 2H), 4.41 – 4.24 (m, 1H), 4.22 – 4.16 (m, 1H), 2.75 (s, 3H), 1.39 (s, 9H). <sup>1</sup>H NMR was taken at rt and shows a mixture of rotamers.

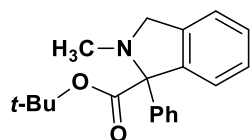

**tert-butyl 1-methyl-1-phenylisoindoline-2-carboxylate (26)** was synthesized according to a modified version of General Procedure S using **24** (0.322 g, 0.949 mmol), MnO<sub>2</sub> (0.659 g, 7.59 mmol), Rh<sub>2</sub>(TFA)<sub>4</sub> (0.006 g, 0.01 mmol), and CH<sub>3</sub>CN (63 mL). The hydrazone was oxidized in CH<sub>3</sub>CN (4 mL) and upon completion by TLC the MnO<sub>2</sub> was filtered off and the diazo was diluted to 63 mL with CH<sub>3</sub>CN. To the solution was added Rh<sub>2</sub>(TFA)<sub>4</sub> and the magenta solution was heated to reflux for 19 h at which point the solution was a dark teal color. The crude product was purified using flash column chromatography (93:7, hexanes:EtOAc) affording **26** as a clear oil (0.150 g, 50%). <sup>1</sup>H NMR (600 MHz, CDCl<sub>3</sub>) δ 7.34 – 7.24 (m, 6H), 7.24 – 7.18 (m, 1H), 7.12 (d, *J* = 7.2 Hz, 2H), 4.27 (d, *J* = 12.5 Hz, 1H), 4.01 (d, *J* = 12.5 Hz, 1H), 2.45 (s, 3H), 1.45 (s, 9H); <sup>13</sup>C NMR (151 MHz, CDCl<sub>3</sub>) δ 171.3, 143.4, 140.7, 139.7, 128.2, 128.0, 127.8, 127.4, 127.0, 124.6, 122.1, 81.9, 79.9, 58.6, 35.6, 28.2; <sup>1</sup>H NMR (600 MHz, C<sub>6</sub>D<sub>6</sub>) δ 7.53 – 7.49 (m, 2H), 7.38 – 7.34 (m, 1H), 7.20 – 7.17 (m, 2H), 7.12 – 6.96 (m, 4H), 4.21 (d, *J* = 12.2 Hz, 1H), 4.03 (d, *J* = 12.2 Hz, 1H), 2.59 (s, 3H), 1.26 (s, 9H); <sup>13</sup>C NMR (151 MHz, C<sub>6</sub>D<sub>6</sub>) δ 171.0, 144.9, 141.3, 141.2, 128.9, 128.2, 127.7, 127.5, 127.1, 124.9, 122.2, 81.0, 80.4, 58.7, 35.1, 28.1; AMM (ESI) *m/z* calcd for C<sub>20</sub>H<sub>24</sub>NO<sub>2</sub><sup>+</sup> [M+H]<sup>+</sup> 310.1802, found 310.1799; IR (neat): ν<sub>max</sub> 2974, 2791, 1720, 1599, 1366 cm<sup>-1</sup>. All spectroscopic data was consistent with literature data.<sup>22</sup>

## COMPUTATIONAL DETAILS

**General comments.** Gas phase DFT calculations provide evidence that nucleophilic attack of the Rh-carbene by the carbamate N is energetically feasible at experimental conditions (a ~13.4 kcal mol<sup>-1</sup> free energy barrier), which subsequently undergoes a facile Stevens [1,2]-rearrangement<sup>23,24</sup> that is 2.8 kcal mol<sup>-1</sup> higher in free energy relative to a free ylide intermediate, i.e. with the Rh catalyst unattached to the carbene carbon. For simplicity, the dirhodium tetraacetate complex was used to approximate the Rh catalyst. While computing the Stevens rearrangement transition state structure (TSS) with the catalyst bound to the substrate, we could only identify an optimized TSS in which the catalyst is not explicitly *bound* to the carbene carbon, that is, a free ylide structure. After the free ylide is formed, the low-energy, concerted Stevens rearrangement step leads to the final product. We also computed the free ylide without

a metal involved to compare energy barriers; the barrier for this process is 2.6 kcal mol<sup>-1</sup> at the uB3LYP/LANL2DZ[6-31G(d)] level of theory. This barrier is 0.2 kcal/mol lower in free energy than that with the catalyst present, which provides further evidence that the metal catalyst may not be essential in this step.

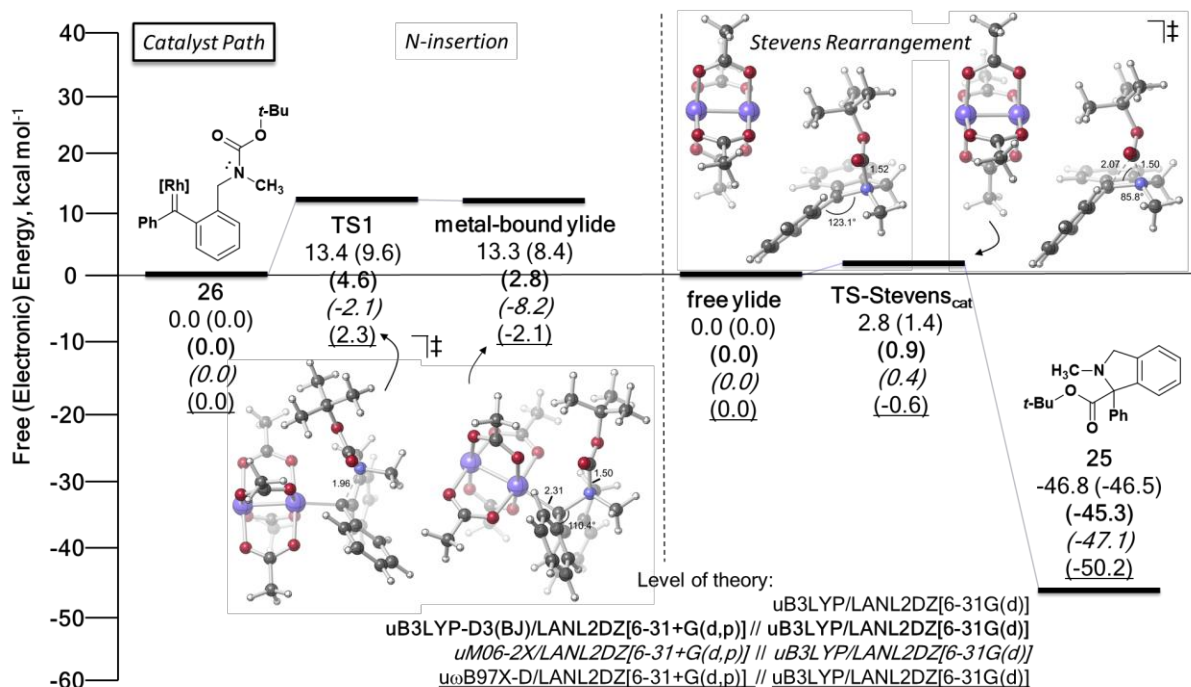

Figure S1. Energetic profile for *N*-attack on the Rh carbene and Stevens rearrangement with Rh catalyst present.

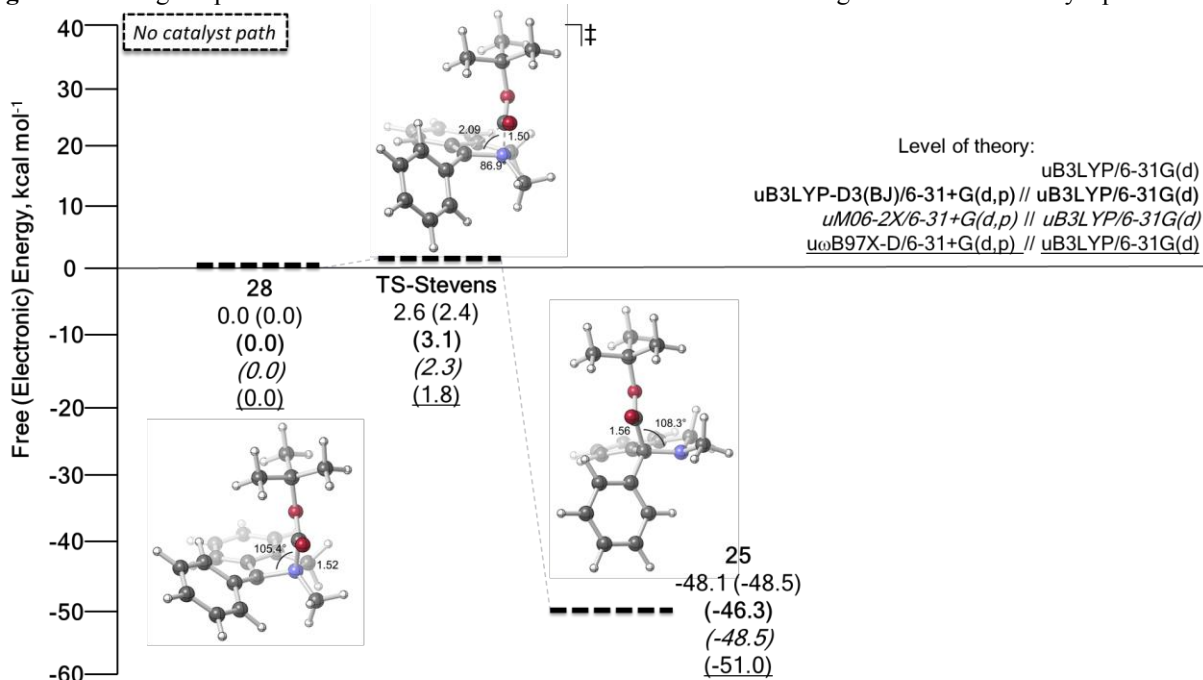

Figure S2. Energetic profile Stevens rearrangement step *without* Rh catalyst.

Recent studies<sup>25,26</sup> highlight that whether Rh catalysts are bound at each step of Rh(II)-catalyzed reactions remains unanswered. In previous theoretical work,<sup>27</sup> we suggested that the Rh catalyst is not involved at every mechanistic step of a Rh(II)-promoted indole formation from vinyl/azidoarenes.

The DFT results in the current study suggest that the concerted Stevens rearrangement energetically prefers a free ylide pathway. Although we cannot definitively say whether the Rh catalyst is present or absent at each step, our results are consistent with the catalyst being involved in the *N*-attack step, but subsequently falling off before the Stevens rearrangement step. Our future computational work will investigate other experimentally relevant examples in which metal catalysts may or may not be involved at every mechanistic step.

Nitrogen attack of the carbamate on to the Rh-carbene is consistent with recent literature demonstrating that the N-H group is more nucleophilic than the carbonyl oxygen.<sup>28</sup> Attack of the carbamate oxygen was also computed, but no productive pathways to the product could be identified.

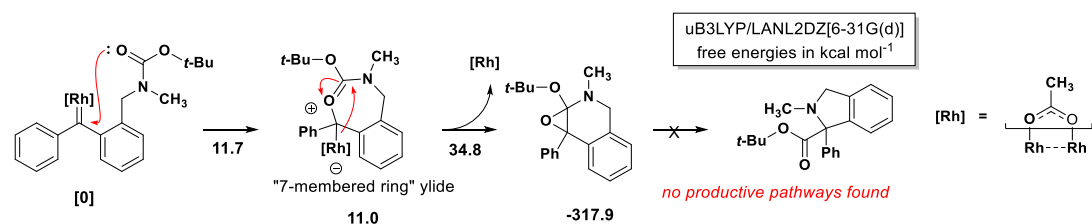

**Figure S3.** Computed Free energy pathway for O attack. Formation of epoxide is energetically viable given the experimental conditions, but significantly exergonic. No further viable pathways to the product could be found.

**Computational Methods.** All Density Functional Theory (DFT) calculations were carried out using the *Gaussian 09* suite of programs.<sup>29</sup> DFT methods were chosen over single-determinant *ab initio* or multiconfigurational methods for practical reasons and because DFT methods have been in reported in the literature as being sufficient for modeling Stevens rearrangements—see below for literature precedent. Additionally, as discussed in more detail below, the need for modeling radical character of the Stevens rearrangement transition state structure (TSS) was ruled out based on wavefunction stability tests on the restricted and unrestricted DFT-optimized TSS's, which support evidence of a stable, non-radical Stevens TSS. Structures are provided with this SI document in the form of a mol2 file. TSS's and minima were optimized using the unrestricted B3LYP (uB3LYP) functional<sup>30</sup> with the 6-31G(d) basis set<sup>31</sup> for C, H, O, and N and the LANL2DZ<sup>32</sup> basis set and effective core potential (ECP) for Rh (i.e. uB3LYP/LANL2DZ[6-31G(d)]). These values are reported in the main manuscript. The “guess=(mix,always)” keyword in *Gaussian 09* was used to allow for singlet diradical species. A wavefunction stability test using the “stable” keyword in *Gaussian 09* on the Stevens rearrangement TSS resulted in a stable wavefunction with an  $\langle S^2 \rangle$  eigenvalue = 0.00.

UB3LYP – optimizes to a “stable” singlet wavefunction

```
SCF Done: E(UB3LYP) = -981.108141993 A.U. after 1 cycles
NFock= 1 Conv=0.50D-08 -V/T= 2.0096
<Sx>= 0.0000 <Sy>= 0.0000 <Sz>= 0.0000 <S**2>= 0.0000 S= 0.0000
<L.S>= 0.000000000000E+00
Annihilation of the first spin contaminant:
S**2 before annihilation 0.0000, after -0.0000
```

```
SavETr: write IOETrn= 770 NScale= 10 NData= 16 NLR=1 NState= 1 LETran=
The wavefunction is stable under the perturbations considered.
The wavefunction is already stable.
```

RB3LYP – singlet wavefunction is “stable”

```
SavETr: write IOETrn= 770 NScale= 10 NData= 16 NLR=1 NState= 1 LETran=  
The wavefunction is stable under the perturbations considered.  
The wavefunction is already stable.
```

Single-point calculations were carried out at the uB3LYP/6-31G(d) geometries using uB3LYP with Grimme’s D3 version of dispersion correction<sup>33</sup> with Becke-Johnson (BJ) damping<sup>34</sup> (uB3LYP-D3(BJ)), uM06-2X,<sup>35</sup> and uωB97X-D<sup>36</sup> functionals with the 6-31+G(d,p) basis set for verification that computed energies were reasonable. These results yielded energies that exhibit the typical variation one might see in a DFT study, thus validating our uB3LYP geometries (see Tables below). Transition state structures and minima were verified as such by frequency calculations: identification of exactly one imaginary frequency and no imaginary frequencies was diagnostic of TSSs and minima, respectively. All uB3LYP coordinates are contained in the concatenated “.mol2” file that comes with the SI.

#### Supplemental References of DFT Methods on Stevens Rearrangements.

- (1) Computational Study of Stevens and Sommelet-Hauser Rearrangements: G. Ghigo and coworkers, *J. Org. Chem.*, **2010**, *75*, 3608.
- (2) Direct dynamics study of [2,3]- and [1,2]-sigmatropic rearrangements: D. A. Singleton and coworkers, *J. Am. Chem. Soc.*, **2014**, *136*, 3740. (notably, the authors thoroughly scrutinized DFT methods against more accurate UBD(T) methods. Although DFT methods do not satisfactorily match the UBD(T) results, they provided a less computationally intensive method to obtain reasonable results.)
- (3) A [2,3]-Stevens Rearrangement: S. C. Schmid et al., *ACS Catal.*, **2018**, *8*, 7907-7914.
- (4) A similar, yet different, DFT study with a Rh(II)-catalyzed [1,5]-sigmatropic rearrangement: J. G. Harrison et al., *J. Am. Chem. Soc.*, **2016**, *138*, 487-490.

**Comments on the Stevens [1,2] rearrangement mechanism.** The mechanism of the Stevens [1,2] rearrangement has been a topic of debate for a long time.<sup>37,38</sup> The rearrangement mechanism can be described as a net 4-electron [1,2]-sigmatropic rearrangement. Thus, according to the Woodward-Hoffmann rules,<sup>39</sup> a concerted rearrangement would result in an inversion of configuration (due to the requirement that one of the orbital components should be antarafacial) at the migrating carbon. However, experimentalists have repeatedly observed *retention* of configuration in Stevens rearrangements;<sup>40</sup> this observation is often rationalized by invoking a non-concerted, radical-pair type mechanism, which has experimental support from the observation of the CIDNP (Chemically Induced Dynamic Nuclear Polarization) effect during some Stevens rearrangements. Ghigo et al.<sup>24</sup> studied this mechanism theoretically in 2010 and reported diradical pathways in most rearrangements studied. The authors discovered that the phenyltrimethylammonium ylide was the one exception. Their computational (DFT) work supported a concerted rearrangement due to the ability of the migrating group, a phenyl group in their case, to delocalize the negative charge and the lack of hydrogens at the same atomic center. Our computed Stevens rearrangement TSS is confirmed to correspond to a

concerted process by Intrinsic Reaction Coordinate (IRC) calculations. This observation is consistent with the carbamate group (presumably) being able to delocalize the negative charge. See Figures S4 and S5 for IRC plots.

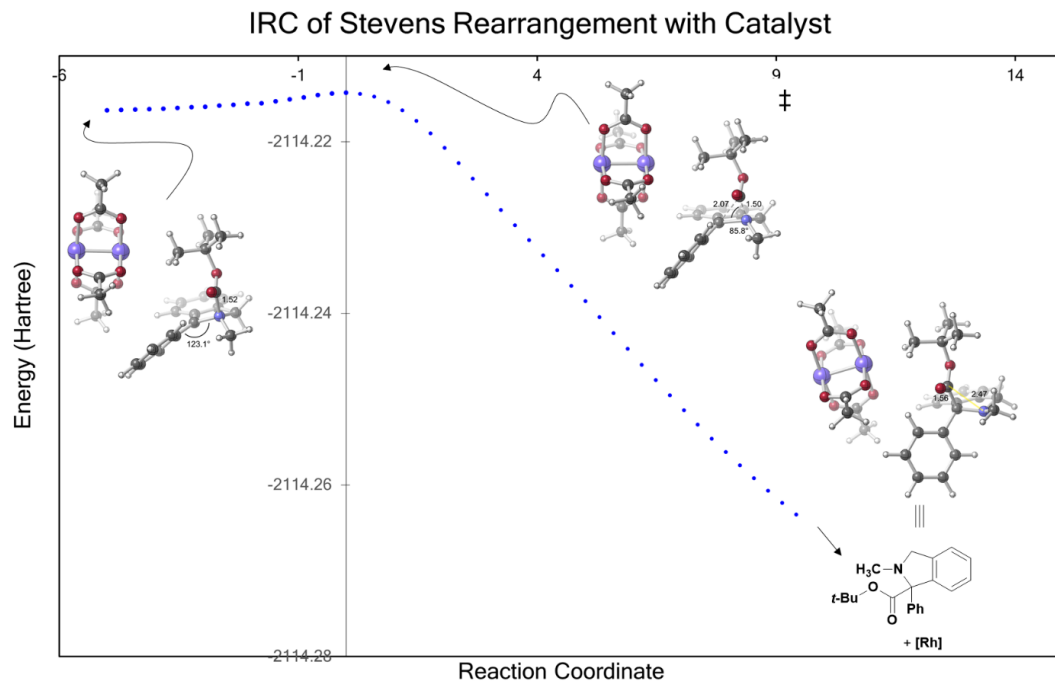

**Figure S4.** Intrinsic Reaction Coordinate (IRC) plot of Stevens Rearrangement step with Rh catalyst present.

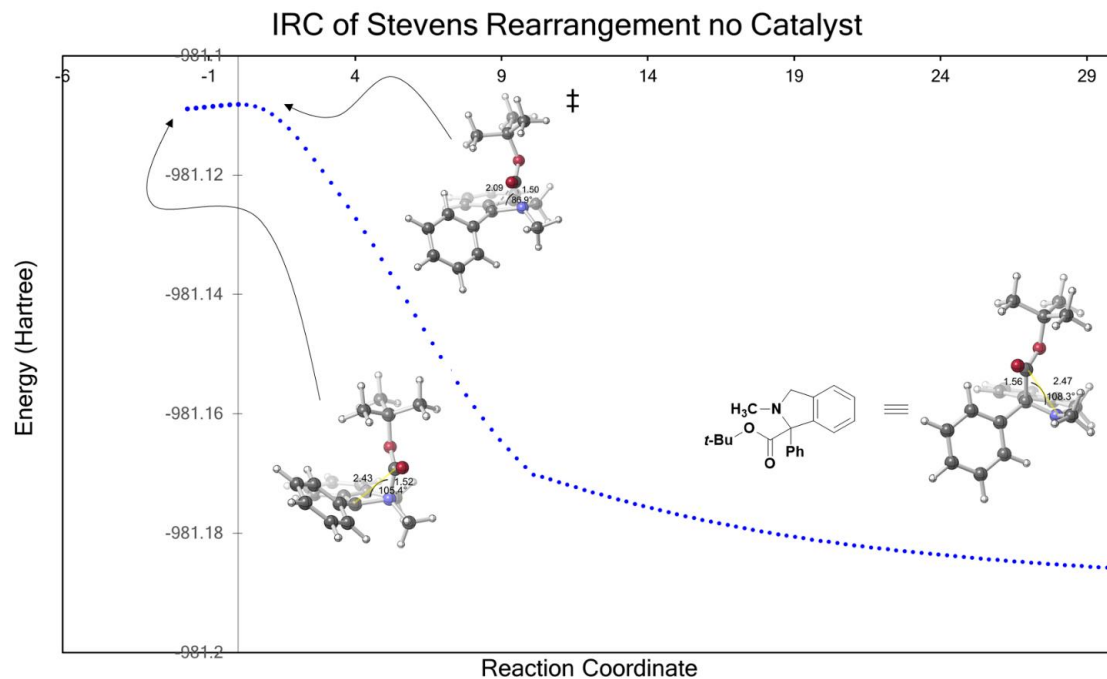

**Figure S5.** Intrinsic Reaction Coordinate (IRC) plot of Stevens Rearrangement step with Rh catalyst absent.

**Energy and Frequencies.**

*uB3LYP/LANL2DZ[6-31G(d)]*

**Table S1.** Free Energies, Electronic Energies, and Frequencies for computed structures for *N*-attack in which the metal catalyst is involved optimized at uB3LYP/LANL2DZ[6-31G(d)]. File number refers to ordering as found in concatenated .mol2 file.

| System                 | File number | Electronic + thermal Free Energies, G (Hartree) | Electronic Energy, E (Hartree) | $\Delta G$ | $\Delta E$ | Lowest Frequency |
|------------------------|-------------|-------------------------------------------------|--------------------------------|------------|------------|------------------|
| TSS – N attacks (TS1)  | 1           | -2113.721793                                    | -2114.24535                    | 13.4       | 9.6        | -165.03          |
| Reactant (26)          | 2           | -2113.743079                                    | -2114.260587                   | [0]        | [0]        | 4.07             |
| Metal-bound ylide (27) | 7           | -2113.721905                                    | -2114.247219                   | 13.3       | 8.4        | 24.01            |

**Table S2.** Free Energies, Electronic Energies, and Frequencies for computed structures for the Stevens rearrangement in which the metal catalyst is involved optimized at uB3LYP/LANL2DZ[6-31G(d)]. File number refers to ordering as found in concatenated .mol2 file.

| System                                                 | File number | Electronic + thermal Free Energies, G (Hartree) | Electronic Energy, E (Hartree) | $\Delta G$ | $\Delta E$ | Lowest Frequency |
|--------------------------------------------------------|-------------|-------------------------------------------------|--------------------------------|------------|------------|------------------|
| Stevens rearrangement TSS (TS-Stevens <sub>cat</sub> ) | 5           | -2113.695073                                    | -2114.214303                   | 2.8        | 1.4        | -236.48          |
| Free ylide (28)                                        | 8           | -2113.699459                                    | -2114.216499                   | [0]        | [0]        | 9.63             |
| Final Product (25)                                     | 3           | -2113.774012                                    | -2114.290523                   | -46.8      | -46.5      | 10.80            |

**Table S3.** Free Energies, Electronic Energies, and Frequencies for computed structures in which the metal catalyst is *absent* optimized at uB3LYP/LANL2DZ[6-31G(d)]. File number refers to ordering as found in concatenated .mol2 file.

| System                                 | File number | Electronic + thermal Free Energies, G (Hartree) | Electronic Energy, E (Hartree) | $\Delta G$ | $\Delta E$ | Lowest Frequency |
|----------------------------------------|-------------|-------------------------------------------------|--------------------------------|------------|------------|------------------|
| Stevens rearrangement TSS (TS-Stevens) | 6           | -980.769834                                     | -981.108142                    | 2.6        | 2.4        | -202.92          |
| Ylide (28)                             | 9           | -980.774042                                     | -981.1119932                   | [0]        | [0]        | 8.68             |
| Final Product (25)                     | 4           | -980.850635                                     | -981.1892336                   | -48.1      | -48.5      | 18.48            |

*uB3LYP-D3(BJ) single-point calculations*

**Table S4.** Single-point calculation Electronic Energies for computed structures for *N*-attack in which the metal catalyst is involved at the uB3LYP-D3(BJ)/LANL2DZ[6-31G(d)] level of theory. Single-point energies were computed at the uB3LYP/LANL2DZ[6-31G(d)] geometry.

| System                | Electronic Energy, E (Hartree) | $\Delta E$ |
|-----------------------|--------------------------------|------------|
| TSS – N attacks (TS1) | -2114.557684                   | 4.6        |
| Reactant (26)         | -2114.565084                   | [0]        |



|                        |              |     |
|------------------------|--------------|-----|
| Metal-bound ylide (27) | -2114.560645 | 2.8 |
|------------------------|--------------|-----|

**Table S5.** Single-point calculation Electronic Energies for computed structures for the Stevens rearrangement in which the metal catalyst is involved at the uB3LYP-D3(BJ)/LANL2DZ[6-31G(d)] level of theory. Single-point energies were computed at the uB3LYP/LANL2DZ[6-31G(d)] geometry.

| System                                                 | Electronic Energy, E (Hartree) | $\Delta E$ |
|--------------------------------------------------------|--------------------------------|------------|
| Stevens rearrangement TSS (TS-Stevens <sub>cat</sub> ) | -2114.509369                   | 0.9        |
| Free ylide (28)                                        | -2114.510764                   | [0]        |
| Final Product (25)                                     | -2114.582915                   | -45.3      |

**Table S6.** Single-point calculation Electronic Energies for computed structures in which the metal catalyst is *absent* at the uB3LYP-D3(BJ)/LANL2DZ[6-31G(d)] level of theory. Single-point energies were computed at the uB3LYP/LANL2DZ[6-31G(d)] geometry.

| System                                 | Electronic Energy, E (Hartree) | $\Delta E$ |
|----------------------------------------|--------------------------------|------------|
| Stevens rearrangement TSS (TS-Stevens) | -981.2777339                   | 3.1        |
| Ylide (28)                             | -981.2827422                   | [0]        |
| Final Product (25)                     | -981.3565186                   | -46.3      |

*uM06-2X single-point calculations*

**Table S7.** Single-point calculation Electronic Energies for computed structures for *N*-attack in which the metal catalyst is involved at the uM06-2X/LANL2DZ[6-31G(d)] level of theory. Single-point energies were computed at the uB3LYP/LANL2DZ[6-31G(d)] geometry.

| System                 | Electronic Energy, E (Hartree) | $\Delta E$ |
|------------------------|--------------------------------|------------|
| TSS – N attacks (TS1)  | -2113.309886                   | -2.1       |
| Reactant (26)          | -2113.306573                   | [0]        |
| Metal-bound ylide (27) | -2113.319651                   | -8.2       |

**Table S8.** Single-point calculation Electronic Energies for computed structures for the Stevens rearrangement in which the metal catalyst is involved at the uM06-2X/LANL2DZ[6-31G(d)] level of theory. Single-point energies were computed at the uB3LYP/LANL2DZ[6-31G(d)] geometry.

| System                                                 | Electronic Energy, E (Hartree) | $\Delta E$ |
|--------------------------------------------------------|--------------------------------|------------|
| Stevens rearrangement TSS (TS-Stevens <sub>cat</sub> ) | -2113.26417                    | 0.4        |
| Free ylide (28)                                        | -2113.264739                   | [0]        |
| Final Product (25)                                     | -2113.339804                   | -47.1      |

**Table S9.** Single-point calculation Electronic Energies for computed structures in which the metal catalyst is *absent* at the uM06-2X/LANL2DZ[6-31G(d)] level of theory. Single-point energies were computed at the uB3LYP/LANL2DZ[6-31G(d)] geometry.

| System                                 | Electronic Energy, E (Hartree) | $\Delta E$ |
|----------------------------------------|--------------------------------|------------|
| Stevens rearrangement TSS (TS-Stevens) | -980.744731                    | 2.3        |
| Ylide (28)                             | -980.7483685                   | [0]        |
| Final Product (25)                     | -980.8255832                   | -48.5      |



Table 1. Crystal data and structure refinement for [C<sub>23</sub>H<sub>19</sub>NO<sub>2</sub>].

|                                   |                                                                             |          |
|-----------------------------------|-----------------------------------------------------------------------------|----------|
| Identification code               | JF2831FMI                                                                   |          |
| Empirical formula                 | C <sub>23</sub> H <sub>19</sub> N O <sub>2</sub>                            |          |
| Formula weight                    | 341.39                                                                      |          |
| Temperature                       | 100(2) K                                                                    |          |
| Wavelength                        | 1.54178 Å                                                                   |          |
| Crystal system                    | Orthorhombic                                                                |          |
| Space group                       | P2 <sub>1</sub> 2 <sub>1</sub> 2 <sub>1</sub>                               |          |
| Unit cell dimensions              | a = 5.5431(2) Å                                                             | α = 90°. |
|                                   | b = 17.2727(6) Å                                                            | β = 90°. |
|                                   | c = 17.7127(6) Å                                                            | γ = 90°. |
| Volume                            | 1695.89(10) Å <sup>3</sup>                                                  |          |
| Z                                 | 4                                                                           |          |
| Density (calculated)              | 1.337 Mg/m <sup>3</sup>                                                     |          |
| Absorption coefficient            | 0.675 mm <sup>-1</sup>                                                      |          |
| F(000)                            | 720                                                                         |          |
| Crystal size                      | 0.214 x 0.106 x 0.076 mm <sup>3</sup>                                       |          |
| Crystal color and habit           | Colorless Block                                                             |          |
| Diffractometer                    | Bruker Photon100 CMOS                                                       |          |
| Theta range for data collection   | 3.574 to 72.081°.                                                           |          |
| Index ranges                      | -5 ≤ h ≤ 6, -21 ≤ k ≤ 21, -21 ≤ l ≤ 21                                      |          |
| Reflections collected             | 10237                                                                       |          |
| Independent reflections           | 3335 [R(int) = 0.0184]                                                      |          |
| Observed reflections (I > 2σ(I))  | 3267                                                                        |          |
| Completeness to theta = 67.679°   | 100.0 %                                                                     |          |
| Absorption correction             | Semi-empirical from equivalents                                             |          |
| Max. and min. transmission        | 0.9370 and 0.8744                                                           |          |
| Solution method                   | SHELXT (Sheldrick, 2014)                                                    |          |
| Refinement method                 | SHELXL-2018/3 (Sheldrick, 2018) Full-matrix least-squares on F <sup>2</sup> |          |
| Data / restraints / parameters    | 3335 / 0 / 312                                                              |          |
| Goodness-of-fit on F <sup>2</sup> | 1.043                                                                       |          |
| Final R indices [I > 2σ(I)]       | R1 = 0.0250, wR2 = 0.0645                                                   |          |
| R indices (all data)              | R1 = 0.0258, wR2 = 0.0651                                                   |          |
| Absolute structure parameter      | -0.08(6)                                                                    |          |
| Extinction coefficient            | 0.0042(4)                                                                   |          |
| Largest diff. peak and hole       | 0.195 and -0.160 e.Å <sup>-3</sup>                                          |          |

Table 2. Atomic coordinates ( $\times 10^4$ ) and equivalent isotropic displacement parameters ( $\text{\AA}^2 \times 10^3$ ) for JF2831FMI.  $U(\text{eq})$  is defined as one third of the trace of the orthogonalized  $U^{ij}$  tensor.

|       | x        | y       | z       | $U(\text{eq})$ |
|-------|----------|---------|---------|----------------|
| C(1)  | 7252(3)  | 4451(1) | 1222(1) | 14(1)          |
| O(1)  | 4745(2)  | 4644(1) | 1209(1) | 15(1)          |
| C(2)  | 8445(3)  | 4838(1) | 1920(1) | 14(1)          |
| C(3)  | 7938(3)  | 5703(1) | 1883(1) | 14(1)          |
| C(4)  | 5973(3)  | 5982(1) | 1475(1) | 14(1)          |
| C(5)  | 4419(3)  | 5441(1) | 1013(1) | 16(1)          |
| C(6)  | 5462(3)  | 6774(1) | 1471(1) | 16(1)          |
| C(7)  | 6926(3)  | 7284(1) | 1862(1) | 16(1)          |
| C(8)  | 8923(3)  | 7012(1) | 2260(1) | 16(1)          |
| C(9)  | 9410(3)  | 6224(1) | 2271(1) | 15(1)          |
| C(10) | 7526(3)  | 3582(1) | 1172(1) | 14(1)          |
| C(11) | 5795(3)  | 3079(1) | 1470(1) | 16(1)          |
| C(12) | 6061(3)  | 2284(1) | 1402(1) | 17(1)          |
| C(13) | 8056(3)  | 1975(1) | 1033(1) | 14(1)          |
| O(13) | 8166(2)  | 1183(1) | 1005(1) | 17(1)          |
| C(14) | 9804(3)  | 2468(1) | 729(1)  | 16(1)          |
| C(15) | 9510(3)  | 3267(1) | 803(1)  | 16(1)          |
| C(16) | 10348(3) | 853(1)  | 719(1)  | 20(1)          |
| C(17) | 7634(3)  | 4494(1) | 2667(1) | 14(1)          |
| C(18) | 5549(3)  | 4750(1) | 3034(1) | 17(1)          |
| C(19) | 4844(3)  | 4428(1) | 3717(1) | 17(1)          |
| C(20) | 6217(3)  | 3838(1) | 4042(1) | 16(1)          |
| C(21) | 8327(3)  | 3579(1) | 3691(1) | 16(1)          |
| C(22) | 9006(3)  | 3914(1) | 3008(1) | 15(1)          |
| C(23) | 5379(3)  | 3480(1) | 4734(1) | 18(1)          |
| N(23) | 4648(3)  | 3193(1) | 5272(1) | 25(1)          |

Table 3. Bond lengths [ $\text{\AA}$ ] and angles [ $^\circ$ ] for JF2831FMI.

|              |            |                 |            |
|--------------|------------|-----------------|------------|
| C(1)-O(1)    | 1.4294(18) | C(17)-C(22)     | 1.396(2)   |
| C(1)-C(10)   | 1.5113(19) | C(17)-C(18)     | 1.397(2)   |
| C(1)-C(2)    | 1.553(2)   | C(18)-C(19)     | 1.388(2)   |
| C(1)-H(1)    | 1.021(19)  | C(18)-H(18)     | 0.99(2)    |
| O(1)-C(5)    | 1.4307(17) | C(19)-C(20)     | 1.396(2)   |
| C(2)-C(17)   | 1.520(2)   | C(19)-H(19)     | 0.96(2)    |
| C(2)-C(3)    | 1.521(2)   | C(20)-C(21)     | 1.397(2)   |
| C(2)-H(2)    | 0.93(2)    | C(20)-C(23)     | 1.450(2)   |
| C(3)-C(4)    | 1.393(2)   | C(21)-C(22)     | 1.392(2)   |
| C(3)-C(9)    | 1.396(2)   | C(21)-H(21)     | 0.99(2)    |
| C(4)-C(6)    | 1.397(2)   | C(22)-H(22)     | 0.96(2)    |
| C(4)-C(5)    | 1.511(2)   | C(23)-N(23)     | 1.147(2)   |
| C(5)-H(5A)   | 1.00(2)    |                 |            |
| C(5)-H(5B)   | 0.992(19)  | O(1)-C(1)-C(10) | 109.16(12) |
| C(6)-C(7)    | 1.384(2)   | O(1)-C(1)-C(2)  | 109.10(12) |
| C(6)-H(6)    | 0.95(2)    | C(10)-C(1)-C(2) | 115.59(12) |
| C(7)-C(8)    | 1.393(2)   | O(1)-C(1)-H(1)  | 107.9(10)  |
| C(7)-H(7)    | 0.96(2)    | C(10)-C(1)-H(1) | 108.8(10)  |
| C(8)-C(9)    | 1.387(2)   | C(2)-C(1)-H(1)  | 106.0(10)  |
| C(8)-H(8)    | 0.95(2)    | C(1)-O(1)-C(5)  | 110.55(11) |
| C(9)-H(9)    | 0.94(2)    | C(17)-C(2)-C(3) | 111.54(12) |
| C(10)-C(15)  | 1.390(2)   | C(17)-C(2)-C(1) | 113.49(12) |
| C(10)-C(11)  | 1.399(2)   | C(3)-C(2)-C(1)  | 108.04(12) |
| C(11)-C(12)  | 1.387(2)   | C(17)-C(2)-H(2) | 108.9(12)  |
| C(11)-H(11)  | 0.97(2)    | C(3)-C(2)-H(2)  | 110.2(12)  |
| C(12)-C(13)  | 1.391(2)   | C(1)-C(2)-H(2)  | 104.3(12)  |
| C(12)-H(12)  | 0.97(2)    | C(4)-C(3)-C(9)  | 119.30(14) |
| C(13)-O(13)  | 1.3711(18) | C(4)-C(3)-C(2)  | 120.42(14) |
| C(13)-C(14)  | 1.397(2)   | C(9)-C(3)-C(2)  | 120.27(14) |
| O(13)-C(16)  | 1.430(2)   | C(3)-C(4)-C(6)  | 119.96(14) |
| C(14)-C(15)  | 1.396(2)   | C(3)-C(4)-C(5)  | 120.84(13) |
| C(14)-H(14)  | 0.96(2)    | C(6)-C(4)-C(5)  | 119.17(14) |
| C(15)-H(15)  | 0.95(2)    | O(1)-C(5)-C(4)  | 113.08(12) |
| C(16)-H(16A) | 0.98(2)    | O(1)-C(5)-H(5A) | 108.1(11)  |
| C(16)-H(16B) | 0.98(2)    | C(4)-C(5)-H(5A) | 109.1(12)  |
| C(16)-H(16C) | 0.99(2)    | O(1)-C(5)-H(5B) | 108.7(10)  |

|                   |            |                     |            |
|-------------------|------------|---------------------|------------|
| C(4)-C(5)-H(5B)   | 109.2(11)  | C(13)-C(14)-H(14)   | 121.3(12)  |
| H(5A)-C(5)-H(5B)  | 108.6(16)  | C(10)-C(15)-C(14)   | 121.56(14) |
| C(7)-C(6)-C(4)    | 120.15(15) | C(10)-C(15)-H(15)   | 119.2(14)  |
| C(7)-C(6)-H(6)    | 119.9(12)  | C(14)-C(15)-H(15)   | 119.2(14)  |
| C(4)-C(6)-H(6)    | 119.9(12)  | O(13)-C(16)-H(16A)  | 112.0(13)  |
| C(6)-C(7)-C(8)    | 120.29(14) | O(13)-C(16)-H(16B)  | 108.8(13)  |
| C(6)-C(7)-H(7)    | 120.0(12)  | H(16A)-C(16)-H(16B) | 109.5(19)  |
| C(8)-C(7)-H(7)    | 119.7(12)  | O(13)-C(16)-H(16C)  | 105.8(14)  |
| C(9)-C(8)-C(7)    | 119.48(15) | H(16A)-C(16)-H(16C) | 107.2(19)  |
| C(9)-C(8)-H(8)    | 120.8(12)  | H(16B)-C(16)-H(16C) | 113.6(17)  |
| C(7)-C(8)-H(8)    | 119.7(12)  | C(22)-C(17)-C(18)   | 118.45(14) |
| C(8)-C(9)-C(3)    | 120.80(15) | C(22)-C(17)-C(2)    | 119.80(14) |
| C(8)-C(9)-H(9)    | 119.4(12)  | C(18)-C(17)-C(2)    | 121.74(13) |
| C(3)-C(9)-H(9)    | 119.8(12)  | C(19)-C(18)-C(17)   | 120.76(14) |
| C(15)-C(10)-C(11) | 118.45(14) | C(19)-C(18)-H(18)   | 118.0(13)  |
| C(15)-C(10)-C(1)  | 119.74(14) | C(17)-C(18)-H(18)   | 121.2(13)  |
| C(11)-C(10)-C(1)  | 121.78(14) | C(18)-C(19)-C(20)   | 119.92(15) |
| C(12)-C(11)-C(10) | 120.69(15) | C(18)-C(19)-H(19)   | 119.9(13)  |
| C(12)-C(11)-H(11) | 119.3(11)  | C(20)-C(19)-H(19)   | 120.2(13)  |
| C(10)-C(11)-H(11) | 120.0(11)  | C(19)-C(20)-C(21)   | 120.39(14) |
| C(11)-C(12)-C(13) | 120.30(15) | C(19)-C(20)-C(23)   | 119.08(15) |
| C(11)-C(12)-H(12) | 120.4(12)  | C(21)-C(20)-C(23)   | 120.50(14) |
| C(13)-C(12)-H(12) | 119.3(12)  | C(22)-C(21)-C(20)   | 118.69(14) |
| O(13)-C(13)-C(12) | 115.73(14) | C(22)-C(21)-H(21)   | 120.9(13)  |
| O(13)-C(13)-C(14) | 124.30(14) | C(20)-C(21)-H(21)   | 120.4(12)  |
| C(12)-C(13)-C(14) | 119.97(14) | C(21)-C(22)-C(17)   | 121.78(15) |
| C(13)-O(13)-C(16) | 116.61(12) | C(21)-C(22)-H(22)   | 119.8(12)  |
| C(15)-C(14)-C(13) | 119.02(14) | C(17)-C(22)-H(22)   | 118.4(12)  |
| C(15)-C(14)-H(14) | 119.7(12)  | N(23)-C(23)-C(20)   | 177.88(19) |

---

Symmetry transformations used to generate equivalent atoms:

Table 4. Anisotropic displacement parameters ( $\text{\AA}^2 \times 10^3$ ) for JF2831FMI. The anisotropic displacement factor exponent takes the form:  $-2\pi^2 [ h^2 a^{*2} U^{11} + \dots + 2 h k a^* b^* U^{12} ]$

---

|                 |                 |                 |                 |                 |                 |
|-----------------|-----------------|-----------------|-----------------|-----------------|-----------------|
| U <sup>11</sup> | U <sup>22</sup> | U <sup>33</sup> | U <sup>23</sup> | U <sup>13</sup> | U <sup>12</sup> |
|-----------------|-----------------|-----------------|-----------------|-----------------|-----------------|

|       |       |       |       |       |       |       |
|-------|-------|-------|-------|-------|-------|-------|
| C(1)  | 14(1) | 15(1) | 15(1) | 1(1)  | 0(1)  | -1(1) |
| O(1)  | 13(1) | 12(1) | 21(1) | 0(1)  | -2(1) | 0(1)  |
| C(2)  | 12(1) | 13(1) | 16(1) | 0(1)  | 0(1)  | 0(1)  |
| C(3)  | 14(1) | 15(1) | 13(1) | 2(1)  | 3(1)  | 0(1)  |
| C(4)  | 14(1) | 15(1) | 14(1) | 1(1)  | 2(1)  | -1(1) |
| C(5)  | 16(1) | 15(1) | 18(1) | 1(1)  | -3(1) | 1(1)  |
| C(6)  | 16(1) | 16(1) | 16(1) | 2(1)  | -1(1) | 0(1)  |
| C(7)  | 20(1) | 11(1) | 18(1) | 2(1)  | 2(1)  | 0(1)  |
| C(8)  | 19(1) | 16(1) | 15(1) | 0(1)  | 0(1)  | -4(1) |
| C(9)  | 15(1) | 18(1) | 13(1) | 2(1)  | 0(1)  | -1(1) |
| C(10) | 16(1) | 14(1) | 12(1) | 0(1)  | -3(1) | -1(1) |
| C(11) | 14(1) | 18(1) | 16(1) | -1(1) | 1(1)  | 1(1)  |
| C(12) | 17(1) | 17(1) | 16(1) | 1(1)  | 1(1)  | -4(1) |
| C(13) | 17(1) | 14(1) | 12(1) | -1(1) | -4(1) | -1(1) |
| O(13) | 18(1) | 14(1) | 20(1) | -1(1) | 1(1)  | -1(1) |
| C(14) | 16(1) | 17(1) | 15(1) | 1(1)  | 2(1)  | 1(1)  |
| C(15) | 15(1) | 17(1) | 16(1) | 2(1)  | 1(1)  | -2(1) |
| C(16) | 23(1) | 15(1) | 22(1) | -1(1) | 5(1)  | 3(1)  |
| C(17) | 14(1) | 12(1) | 15(1) | -1(1) | -2(1) | -2(1) |
| C(18) | 17(1) | 14(1) | 20(1) | 2(1)  | -1(1) | 2(1)  |
| C(19) | 14(1) | 18(1) | 19(1) | -2(1) | 2(1)  | 1(1)  |
| C(20) | 17(1) | 15(1) | 15(1) | -1(1) | -1(1) | -4(1) |
| C(21) | 18(1) | 13(1) | 16(1) | 0(1)  | -2(1) | 1(1)  |
| C(22) | 14(1) | 14(1) | 17(1) | -2(1) | 1(1)  | 1(1)  |
| C(23) | 18(1) | 18(1) | 18(1) | -2(1) | -1(1) | 0(1)  |
| N(23) | 26(1) | 29(1) | 20(1) | 4(1)  | 4(1)  | 1(1)  |

Table 5. Hydrogen coordinates ( $\times 10^4$ ) and isotropic displacement parameters ( $\text{\AA}^2 \times 10^{-3}$ ) for JF2831FMI.

|      | x        | y        | z       | U(eq) |
|------|----------|----------|---------|-------|
| H(1) | 8040(30) | 4697(10) | 760(10) | 8(4)  |

|        |           |          |          |       |
|--------|-----------|----------|----------|-------|
| H(2)   | 10090(40) | 4745(11) | 1857(11) | 12(4) |
| H(5A)  | 2690(40)  | 5576(11) | 1094(11) | 19(5) |
| H(5B)  | 4810(40)  | 5509(10) | 470(10)  | 10(4) |
| H(6)   | 4140(40)  | 6963(11) | 1190(11) | 18(5) |
| H(7)   | 6570(40)  | 7828(12) | 1860(11) | 16(5) |
| H(8)   | 9930(40)  | 7368(11) | 2522(11) | 19(5) |
| H(9)   | 10740(40) | 6042(11) | 2544(12) | 19(5) |
| H(11)  | 4390(40)  | 3285(11) | 1728(11) | 17(5) |
| H(12)  | 4880(40)  | 1936(12) | 1625(12) | 19(5) |
| H(14)  | 11180(40) | 2268(12) | 466(11)  | 20(5) |
| H(15)  | 10690(50) | 3604(13) | 592(12)  | 29(6) |
| H(16A) | 11770(40) | 1047(13) | 984(13)  | 27(6) |
| H(16B) | 10480(40) | 975(12)  | 182(12)  | 25(5) |
| H(16C) | 10240(40) | 290(13)  | 825(12)  | 26(5) |
| H(18)  | 4550(40)  | 5171(12) | 2822(12) | 21(5) |
| H(19)  | 3400(40)  | 4604(12) | 3959(12) | 25(5) |
| H(21)  | 9300(40)  | 3162(12) | 3922(12) | 21(5) |
| H(22)  | 10470(40) | 3748(11) | 2763(11) | 18(5) |

Table 6. Torsion angles [°] for JF2831FMI.

|                       |             |                       |             |
|-----------------------|-------------|-----------------------|-------------|
| C(10)-C(1)-O(1)-C(5)  | -161.47(11) | C(1)-O(1)-C(5)-C(4)   | -49.74(16)  |
| C(2)-C(1)-O(1)-C(5)   | 71.35(14)   | C(3)-C(4)-C(5)-O(1)   | 16.4(2)     |
| O(1)-C(1)-C(2)-C(17)  | 68.87(15)   | C(6)-C(4)-C(5)-O(1)   | -165.47(13) |
| C(10)-C(1)-C(2)-C(17) | -54.56(18)  | C(3)-C(4)-C(6)-C(7)   | 1.0(2)      |
| O(1)-C(1)-C(2)-C(3)   | -55.36(15)  | C(5)-C(4)-C(6)-C(7)   | -177.09(14) |
| C(10)-C(1)-C(2)-C(3)  | -178.80(13) | C(4)-C(6)-C(7)-C(8)   | 0.2(2)      |
| C(17)-C(2)-C(3)-C(4)  | -102.21(16) | C(6)-C(7)-C(8)-C(9)   | -1.0(2)     |
| C(1)-C(2)-C(3)-C(4)   | 23.18(19)   | C(7)-C(8)-C(9)-C(3)   | 0.6(2)      |
| C(17)-C(2)-C(3)-C(9)  | 76.41(18)   | C(4)-C(3)-C(9)-C(8)   | 0.6(2)      |
| C(1)-C(2)-C(3)-C(9)   | -158.19(13) | C(2)-C(3)-C(9)-C(8)   | -178.01(14) |
| C(9)-C(3)-C(4)-C(6)   | -1.4(2)     | O(1)-C(1)-C(10)-C(15) | 147.26(14)  |
| C(2)-C(3)-C(4)-C(6)   | 177.20(14)  | C(2)-C(1)-C(10)-C(15) | -89.34(17)  |
| C(9)-C(3)-C(4)-C(5)   | 176.65(13)  | O(1)-C(1)-C(10)-C(11) | -30.97(19)  |
| C(2)-C(3)-C(4)-C(5)   | -4.7(2)     | C(2)-C(1)-C(10)-C(11) | 92.43(18)   |



|                         |             |                         |             |
|-------------------------|-------------|-------------------------|-------------|
| C(15)-C(10)-C(11)-C(12) | 0.3(2)      | C(1)-C(2)-C(17)-C(22)   | 94.98(16)   |
| C(1)-C(10)-C(11)-C(12)  | 178.57(14)  | C(3)-C(2)-C(17)-C(18)   | 36.5(2)     |
| C(10)-C(11)-C(12)-C(13) | -0.2(2)     | C(1)-C(2)-C(17)-C(18)   | -85.85(17)  |
| C(11)-C(12)-C(13)-O(13) | 179.14(14)  | C(22)-C(17)-C(18)-C(19) | -0.7(2)     |
| C(11)-C(12)-C(13)-C(14) | 0.0(2)      | C(2)-C(17)-C(18)-C(19)  | -179.89(14) |
| C(12)-C(13)-O(13)-C(16) | -171.99(13) | C(17)-C(18)-C(19)-C(20) | -0.5(2)     |
| C(14)-C(13)-O(13)-C(16) | 7.1(2)      | C(18)-C(19)-C(20)-C(21) | 1.4(2)      |
| O(13)-C(13)-C(14)-C(15) | -179.00(14) | C(18)-C(19)-C(20)-C(23) | -176.62(15) |
| C(12)-C(13)-C(14)-C(15) | 0.1(2)      | C(19)-C(20)-C(21)-C(22) | -1.0(2)     |
| C(11)-C(10)-C(15)-C(14) | -0.3(2)     | C(23)-C(20)-C(21)-C(22) | 176.93(15)  |
| C(1)-C(10)-C(15)-C(14)  | -178.54(14) | C(20)-C(21)-C(22)-C(17) | -0.2(2)     |
| C(13)-C(14)-C(15)-C(10) | 0.1(2)      | C(18)-C(17)-C(22)-C(21) | 1.1(2)      |
| C(3)-C(2)-C(17)-C(22)   | -142.70(14) | C(2)-C(17)-C(22)-C(21)  | -179.75(14) |

Symmetry transformations used to generate equivalent atoms:

### ISOCHROMAN 13b

Table 1. Crystal data and structure refinement for [C<sub>23</sub>H<sub>20</sub>O].

|                         |                                       |                    |
|-------------------------|---------------------------------------|--------------------|
| Identification code     | JF2822FMI (BDB11-11-018)              |                    |
| Empirical formula       | C <sub>23</sub> H <sub>20</sub> O     |                    |
| Formula weight          | 312.39                                |                    |
| Temperature             | 90(2) K                               |                    |
| Wavelength              | 1.54178 Å                             |                    |
| Crystal system          | Monoclinic                            |                    |
| Space group             | I2                                    |                    |
| Unit cell dimensions    | a = 17.3724(8) Å                      | α = 90°.           |
|                         | b = 5.5677(3) Å                       | β = 111.6606(19)°. |
|                         | c = 18.8919(12) Å                     | γ = 90°.           |
| Volume                  | 1698.27(16) Å <sup>3</sup>            |                    |
| Z                       | 4                                     |                    |
| Density (calculated)    | 1.222 Mg/m <sup>3</sup>               |                    |
| Absorption coefficient  | 0.562 mm <sup>-1</sup>                |                    |
| F(000)                  | 664                                   |                    |
| Crystal size            | 0.240 x 0.167 x 0.062 mm <sup>3</sup> |                    |
| Crystal color and habit | Colorless Plate                       |                    |

|                                      |                                                                             |
|--------------------------------------|-----------------------------------------------------------------------------|
| Diffractometer                       | Bruker APEX-II CCD                                                          |
| Theta range for data collection      | 2.956 to 69.279°.                                                           |
| Index ranges                         | -20<=h<=20, -6<=k<=6, -22<=l<=22                                            |
| Reflections collected                | 4368                                                                        |
| Independent reflections              | 2996 [R(int) = 0.0156]                                                      |
| Observed reflections (I > 2sigma(I)) | 2931                                                                        |
| Completeness to theta = 67.679°      | 99.1 %                                                                      |
| Absorption correction                | Semi-empirical from equivalents                                             |
| Max. and min. transmission           | 0.9369 and 0.8379                                                           |
| Solution method                      | SHELXT (Sheldrick, 2014)                                                    |
| Refinement method                    | SHELXL-2018/3 (Sheldrick, 2018) Full-matrix least-squares on F <sup>2</sup> |
| Data / restraints / parameters       | 2996 / 1 / 297                                                              |
| Goodness-of-fit on F <sup>2</sup>    | 1.040                                                                       |
| Final R indices [I>2sigma(I)]        | R1 = 0.0301, wR2 = 0.0792                                                   |
| R indices (all data)                 | R1 = 0.0308, wR2 = 0.0800                                                   |
| Absolute structure parameter         | 0.05(15)                                                                    |
| Largest diff. peak and hole          | 0.372 and -0.151 e.Å <sup>-3</sup>                                          |

Table 2. Atomic coordinates ( x 10<sup>4</sup>) and equivalent isotropic displacement parameters (Å<sup>2</sup>x 10<sup>3</sup>) for JF2822FMI. U(eq) is defined as one third of the trace of the orthogonalized U<sup>ij</sup> tensor.

|       | x       | y       | z       | U(eq) |
|-------|---------|---------|---------|-------|
| C(1)  | 8822(1) | 5106(3) | 5479(1) | 26(1) |
| O(1)  | 8862(1) | 7507(3) | 5754(1) | 26(1) |
| C(2)  | 9278(1) | 7543(4) | 6560(1) | 26(1) |
| C(3)  | 8904(1) | 5850(3) | 6964(1) | 23(1) |
| C(4)  | 9062(1) | 6145(4) | 7738(1) | 28(1) |
| C(5)  | 8767(1) | 4529(4) | 8130(1) | 30(1) |
| C(6)  | 8292(1) | 2573(4) | 7747(1) | 29(1) |
| C(7)  | 8116(1) | 2306(4) | 6973(1) | 26(1) |
| C(8)  | 8421(1) | 3916(3) | 6575(1) | 23(1) |
| C(9)  | 8217(1) | 3586(3) | 5726(1) | 23(1) |
| C(10) | 8602(1) | 5221(4) | 4633(1) | 28(1) |
| C(11) | 8889(1) | 3643(4) | 4265(1) | 27(1) |
| C(12) | 8746(1) | 3555(3) | 3446(1) | 25(1) |

|       |         |         |         |       |
|-------|---------|---------|---------|-------|
| C(13) | 9074(1) | 1629(4) | 3179(1) | 29(1) |
| C(14) | 8981(1) | 1463(4) | 2419(1) | 29(1) |
| C(15) | 8561(1) | 3248(4) | 1911(1) | 28(1) |
| C(16) | 8233(1) | 5179(4) | 2170(1) | 29(1) |
| C(17) | 8322(1) | 5329(4) | 2927(1) | 27(1) |
| C(18) | 7312(1) | 4108(3) | 5267(1) | 23(1) |
| C(19) | 6848(1) | 2462(4) | 4726(1) | 28(1) |
| C(20) | 6011(1) | 2858(4) | 4302(1) | 30(1) |
| C(21) | 5632(1) | 4930(4) | 4412(1) | 28(1) |
| C(22) | 6091(1) | 6609(4) | 4946(1) | 27(1) |
| C(23) | 6923(1) | 6195(4) | 5371(1) | 25(1) |

Table 3. Bond lengths [ $\text{\AA}$ ] and angles [ $^\circ$ ] for JF2822FMI.

|            |          |             |          |
|------------|----------|-------------|----------|
| C(1)-O(1)  | 1.427(2) | C(10)-C(11) | 1.326(3) |
| C(1)-C(10) | 1.501(2) | C(10)-H(10) | 0.96(3)  |
| C(1)-C(9)  | 1.549(2) | C(11)-C(12) | 1.475(2) |
| C(1)-H(1)  | 0.99(2)  | C(11)-H(11) | 1.01(3)  |
| O(1)-C(2)  | 1.425(2) | C(12)-C(13) | 1.393(3) |
| C(2)-C(3)  | 1.502(3) | C(12)-C(17) | 1.395(3) |
| C(2)-H(2A) | 0.99(2)  | C(13)-C(14) | 1.387(3) |
| C(2)-H(2B) | 1.01(3)  | C(13)-H(13) | 0.99(2)  |
| C(3)-C(4)  | 1.395(3) | C(14)-C(15) | 1.388(3) |
| C(3)-C(8)  | 1.396(2) | C(14)-H(14) | 0.98(3)  |
| C(4)-C(5)  | 1.380(3) | C(15)-C(16) | 1.387(3) |
| C(4)-H(4)  | 0.98(3)  | C(15)-H(15) | 0.95(2)  |
| C(5)-C(6)  | 1.396(3) | C(16)-C(17) | 1.384(3) |
| C(5)-H(5)  | 0.99(2)  | C(16)-H(16) | 1.00(2)  |
| C(6)-C(7)  | 1.386(2) | C(17)-H(17) | 0.89(3)  |
| C(6)-H(6)  | 0.96(2)  | C(18)-C(19) | 1.388(3) |
| C(7)-C(8)  | 1.395(3) | C(18)-C(23) | 1.394(3) |
| C(7)-H(7)  | 1.01(2)  | C(19)-C(20) | 1.394(3) |
| C(8)-C(9)  | 1.522(2) | C(19)-H(19) | 0.97(2)  |
| C(9)-C(18) | 1.517(2) | C(20)-C(21) | 1.382(3) |
| C(9)-H(9)  | 1.00(2)  | C(20)-H(20) | 0.95(3)  |

|                  |            |                   |            |
|------------------|------------|-------------------|------------|
| C(21)-C(22)      | 1.390(3)   | C(3)-C(8)-C(9)    | 120.54(16) |
| C(21)-H(21)      | 1.01(2)    | C(18)-C(9)-C(8)   | 111.56(14) |
| C(22)-C(23)      | 1.389(3)   | C(18)-C(9)-C(1)   | 113.53(15) |
| C(22)-H(22)      | 0.93(2)    | C(8)-C(9)-C(1)    | 109.40(14) |
| C(23)-H(23)      | 0.98(3)    | C(18)-C(9)-H(9)   | 108.4(11)  |
|                  |            | C(8)-C(9)-H(9)    | 108.7(11)  |
| O(1)-C(1)-C(10)  | 107.87(15) | C(1)-C(9)-H(9)    | 104.9(11)  |
| O(1)-C(1)-C(9)   | 110.45(14) | C(11)-C(10)-C(1)  | 122.15(17) |
| C(10)-C(1)-C(9)  | 114.17(15) | C(11)-C(10)-H(10) | 122.0(15)  |
| O(1)-C(1)-H(1)   | 108.4(13)  | C(1)-C(10)-H(10)  | 115.8(15)  |
| C(10)-C(1)-H(1)  | 108.4(12)  | C(10)-C(11)-C(12) | 128.43(17) |
| C(9)-C(1)-H(1)   | 107.4(12)  | C(10)-C(11)-H(11) | 117.7(14)  |
| C(2)-O(1)-C(1)   | 109.87(14) | C(12)-C(11)-H(11) | 113.9(14)  |
| O(1)-C(2)-C(3)   | 112.95(15) | C(13)-C(12)-C(17) | 118.09(16) |
| O(1)-C(2)-H(2A)  | 108.3(12)  | C(13)-C(12)-C(11) | 118.21(17) |
| C(3)-C(2)-H(2A)  | 109.8(13)  | C(17)-C(12)-C(11) | 123.67(17) |
| O(1)-C(2)-H(2B)  | 105.6(12)  | C(14)-C(13)-C(12) | 121.26(18) |
| C(3)-C(2)-H(2B)  | 111.1(13)  | C(14)-C(13)-H(13) | 119.0(14)  |
| H(2A)-C(2)-H(2B) | 109.1(18)  | C(12)-C(13)-H(13) | 119.7(14)  |
| C(4)-C(3)-C(8)   | 119.32(17) | C(13)-C(14)-C(15) | 119.95(18) |
| C(4)-C(3)-C(2)   | 120.22(16) | C(13)-C(14)-H(14) | 119.1(13)  |
| C(8)-C(3)-C(2)   | 120.42(16) | C(15)-C(14)-H(14) | 120.9(13)  |
| C(5)-C(4)-C(3)   | 121.24(18) | C(16)-C(15)-C(14) | 119.37(17) |
| C(5)-C(4)-H(4)   | 121.9(14)  | C(16)-C(15)-H(15) | 121.5(14)  |
| C(3)-C(4)-H(4)   | 116.9(15)  | C(14)-C(15)-H(15) | 119.1(14)  |
| C(4)-C(5)-C(6)   | 119.69(17) | C(17)-C(16)-C(15) | 120.51(18) |
| C(4)-C(5)-H(5)   | 121.6(14)  | C(17)-C(16)-H(16) | 119.2(14)  |
| C(6)-C(5)-H(5)   | 118.7(14)  | C(15)-C(16)-H(16) | 120.2(14)  |
| C(7)-C(6)-C(5)   | 119.28(18) | C(16)-C(17)-C(12) | 120.81(18) |
| C(7)-C(6)-H(6)   | 120.4(13)  | C(16)-C(17)-H(17) | 119.9(15)  |
| C(5)-C(6)-H(6)   | 120.2(13)  | C(12)-C(17)-H(17) | 119.3(15)  |
| C(6)-C(7)-C(8)   | 121.32(18) | C(19)-C(18)-C(23) | 118.28(16) |
| C(6)-C(7)-H(7)   | 118.6(13)  | C(19)-C(18)-C(9)  | 119.44(17) |
| C(8)-C(7)-H(7)   | 120.1(13)  | C(23)-C(18)-C(9)  | 122.27(16) |
| C(7)-C(8)-C(3)   | 119.13(16) | C(18)-C(19)-C(20) | 121.14(19) |
| C(7)-C(8)-C(9)   | 120.33(16) | C(18)-C(19)-H(19) | 119.1(12)  |

|                   |            |                   |            |
|-------------------|------------|-------------------|------------|
| C(20)-C(19)-H(19) | 119.7(12)  | C(23)-C(22)-C(21) | 120.25(18) |
| C(21)-C(20)-C(19) | 120.00(18) | C(23)-C(22)-H(22) | 117.9(13)  |
| C(21)-C(20)-H(20) | 120.5(15)  | C(21)-C(22)-H(22) | 121.9(13)  |
| C(19)-C(20)-H(20) | 119.5(15)  | C(22)-C(23)-C(18) | 120.82(17) |
| C(20)-C(21)-C(22) | 119.49(17) | C(22)-C(23)-H(23) | 120.3(14)  |
| C(20)-C(21)-H(21) | 120.6(14)  | C(18)-C(23)-H(23) | 118.9(14)  |
| C(22)-C(21)-H(21) | 119.9(14)  |                   |            |

---

Symmetry transformations used to generate equivalent atoms:

Table 4. Anisotropic displacement parameters ( $\text{\AA}^2 \times 10^3$ ) for JF2822FMI. The anisotropic displacement factor exponent takes the form:  $-2\pi^2 [ h^2 a^{*2} U^{11} + \dots + 2 h k a^* b^* U^{12} ]$

|       | U <sup>11</sup> | U <sup>22</sup> | U <sup>33</sup> | U <sup>23</sup> | U <sup>13</sup> | U <sup>12</sup> |
|-------|-----------------|-----------------|-----------------|-----------------|-----------------|-----------------|
| C(1)  | 22(1)           | 29(1)           | 26(1)           | 1(1)            | 10(1)           | 3(1)            |
| O(1)  | 25(1)           | 28(1)           | 25(1)           | 1(1)            | 9(1)            | -1(1)           |
| C(2)  | 21(1)           | 29(1)           | 26(1)           | -1(1)           | 6(1)            | -1(1)           |
| C(3)  | 18(1)           | 25(1)           | 24(1)           | 0(1)            | 5(1)            | 3(1)            |
| C(4)  | 23(1)           | 30(1)           | 25(1)           | -2(1)           | 3(1)            | 1(1)            |
| C(5)  | 29(1)           | 39(1)           | 21(1)           | 0(1)            | 7(1)            | 5(1)            |
| C(6)  | 30(1)           | 31(1)           | 28(1)           | 6(1)            | 12(1)           | 4(1)            |
| C(7)  | 24(1)           | 26(1)           | 27(1)           | 0(1)            | 9(1)            | 0(1)            |
| C(8)  | 19(1)           | 24(1)           | 23(1)           | 1(1)            | 6(1)            | 4(1)            |
| C(9)  | 22(1)           | 25(1)           | 23(1)           | -2(1)           | 8(1)            | 1(1)            |
| C(10) | 24(1)           | 33(1)           | 28(1)           | 2(1)            | 11(1)           | 1(1)            |
| C(11) | 22(1)           | 31(1)           | 26(1)           | 1(1)            | 8(1)            | 1(1)            |
| C(12) | 19(1)           | 30(1)           | 27(1)           | -2(1)           | 9(1)            | -3(1)           |
| C(13) | 28(1)           | 32(1)           | 27(1)           | 3(1)            | 9(1)            | 5(1)            |
| C(14) | 30(1)           | 32(1)           | 28(1)           | -2(1)           | 12(1)           | 4(1)            |
| C(15) | 27(1)           | 35(1)           | 24(1)           | 1(1)            | 11(1)           | -1(1)           |
| C(16) | 26(1)           | 30(1)           | 30(1)           | 6(1)            | 11(1)           | 2(1)            |
| C(17) | 25(1)           | 27(1)           | 33(1)           | -2(1)           | 14(1)           | 0(1)            |
| C(18) | 23(1)           | 27(1)           | 19(1)           | 1(1)            | 9(1)            | -2(1)           |
| C(19) | 26(1)           | 29(1)           | 26(1)           | -3(1)           | 8(1)            | 1(1)            |
| C(20) | 27(1)           | 34(1)           | 26(1)           | -7(1)           | 6(1)            | -3(1)           |

|       |       |       |       |       |       |       |
|-------|-------|-------|-------|-------|-------|-------|
| C(21) | 23(1) | 37(1) | 23(1) | 0(1)  | 7(1)  | 0(1)  |
| C(22) | 26(1) | 32(1) | 24(1) | -3(1) | 11(1) | 4(1)  |
| C(23) | 25(1) | 28(1) | 21(1) | -4(1) | 8(1)  | -2(1) |

Table 5. Hydrogen coordinates ( $\times 10^4$ ) and isotropic displacement parameters ( $\text{\AA}^2 \times 10^3$ ) for JF2822FMI.

|       | x        | y        | z        | U(eq) |
|-------|----------|----------|----------|-------|
| H(1)  | 9380(13) | 4370(40) | 5713(11) | 21(5) |
| H(2A) | 9866(14) | 7120(40) | 6680(11) | 24(5) |
| H(2B) | 9244(13) | 9260(50) | 6719(12) | 25(5) |
| H(4)  | 9379(15) | 7570(50) | 7984(13) | 36(6) |
| H(5)  | 8886(13) | 4710(40) | 8681(12) | 27(5) |
| H(6)  | 8071(13) | 1470(40) | 8011(12) | 22(5) |
| H(7)  | 7764(14) | 890(40)  | 6699(12) | 28(5) |
| H(9)  | 8334(12) | 1880(40) | 5630(11) | 16(5) |
| H(10) | 8238(15) | 6510(50) | 4373(14) | 39(6) |
| H(11) | 9263(15) | 2330(50) | 4574(13) | 37(6) |
| H(13) | 9385(14) | 370(50)  | 3536(13) | 29(6) |
| H(14) | 9216(15) | 70(50)   | 2249(13) | 35(6) |
| H(15) | 8507(13) | 3120(40) | 1394(13) | 28(6) |
| H(16) | 7918(14) | 6460(50) | 1808(13) | 31(6) |
| H(17) | 8113(14) | 6580(50) | 3089(13) | 29(6) |
| H(19) | 7108(13) | 980(40)  | 4659(12) | 26(5) |
| H(20) | 5703(15) | 1670(50) | 3949(14) | 38(6) |
| H(21) | 5025(15) | 5240(40) | 4107(13) | 32(6) |
| H(22) | 5856(13) | 8030(40) | 5035(12) | 24(5) |
| H(23) | 7245(14) | 7370(50) | 5746(13) | 35(6) |

Table 6. Torsion angles [ $^\circ$ ] for JF2822FMI.

|                      |             |                     |             |
|----------------------|-------------|---------------------|-------------|
| C(10)-C(1)-O(1)-C(2) | -164.53(13) | C(1)-O(1)-C(2)-C(3) | -54.09(19)  |
| C(9)-C(1)-O(1)-C(2)  | 70.07(18)   | O(1)-C(2)-C(3)-C(4) | -160.97(16) |

|                        |             |                         |             |
|------------------------|-------------|-------------------------|-------------|
| O(1)-C(2)-C(3)-C(8)    | 21.4(2)     | C(10)-C(11)-C(12)-C(13) | -176.18(19) |
| C(8)-C(3)-C(4)-C(5)    | 1.7(3)      | C(10)-C(11)-C(12)-C(17) | 5.7(3)      |
| C(2)-C(3)-C(4)-C(5)    | -176.03(17) | C(17)-C(12)-C(13)-C(14) | -0.2(3)     |
| C(3)-C(4)-C(5)-C(6)    | -0.8(3)     | C(11)-C(12)-C(13)-C(14) | -178.39(17) |
| C(4)-C(5)-C(6)-C(7)    | -0.9(3)     | C(12)-C(13)-C(14)-C(15) | 0.5(3)      |
| C(5)-C(6)-C(7)-C(8)    | 1.7(3)      | C(13)-C(14)-C(15)-C(16) | -0.3(3)     |
| C(6)-C(7)-C(8)-C(3)    | -0.8(3)     | C(14)-C(15)-C(16)-C(17) | -0.2(3)     |
| C(6)-C(7)-C(8)-C(9)    | -179.87(16) | C(15)-C(16)-C(17)-C(12) | 0.5(3)      |
| C(4)-C(3)-C(8)-C(7)    | -0.8(2)     | C(13)-C(12)-C(17)-C(16) | -0.3(3)     |
| C(2)-C(3)-C(8)-C(7)    | 176.85(16)  | C(11)-C(12)-C(17)-C(16) | 177.78(17)  |
| C(4)-C(3)-C(8)-C(9)    | 178.21(16)  | C(8)-C(9)-C(18)-C(19)   | -130.14(17) |
| C(2)-C(3)-C(8)-C(9)    | -4.1(2)     | C(1)-C(9)-C(18)-C(19)   | 105.7(2)    |
| C(7)-C(8)-C(9)-C(18)   | 70.0(2)     | C(8)-C(9)-C(18)-C(23)   | 49.7(2)     |
| C(3)-C(8)-C(9)-C(18)   | -109.04(18) | C(1)-C(9)-C(18)-C(23)   | -74.5(2)    |
| C(7)-C(8)-C(9)-C(1)    | -163.56(16) | C(23)-C(18)-C(19)-C(20) | -0.9(3)     |
| C(3)-C(8)-C(9)-C(1)    | 17.4(2)     | C(9)-C(18)-C(19)-C(20)  | 178.94(17)  |
| O(1)-C(1)-C(9)-C(18)   | 75.86(19)   | C(18)-C(19)-C(20)-C(21) | 0.7(3)      |
| C(10)-C(1)-C(9)-C(18)  | -45.9(2)    | C(19)-C(20)-C(21)-C(22) | 0.1(3)      |
| O(1)-C(1)-C(9)-C(8)    | -49.47(18)  | C(20)-C(21)-C(22)-C(23) | -0.7(3)     |
| C(10)-C(1)-C(9)-C(8)   | -171.22(15) | C(21)-C(22)-C(23)-C(18) | 0.5(3)      |
| O(1)-C(1)-C(10)-C(11)  | 146.39(18)  | C(19)-C(18)-C(23)-C(22) | 0.3(3)      |
| C(9)-C(1)-C(10)-C(11)  | -90.4(2)    | C(9)-C(18)-C(23)-C(22)  | -179.52(17) |
| C(1)-C(10)-C(11)-C(12) | -178.39(17) |                         |             |

Symmetry transformations used to generate equivalent atoms:

Table 7. Hydrogen bonds for JF2822FMI [ $\text{\AA}$  and  $^\circ$ ].

| D-H...A            | d(D-H)  | d(H...A) | d(D...A) | $\angle$ (DHA) |
|--------------------|---------|----------|----------|----------------|
| C(9)-H(9)...O(1)#1 | 1.00(2) | 2.58(2)  | 3.560(2) | 165.3(15)      |

Symmetry transformations used to generate equivalent atoms:

#1 x,y-1,z

**ISOCHROMAN 17c**

Table 1. Crystal data and structure refinement for [C<sub>28</sub>H<sub>24</sub>O<sub>2</sub>].

|                                   |                                                                             |                  |
|-----------------------------------|-----------------------------------------------------------------------------|------------------|
| Identification code               | JF2849FMI (MG-2-184)                                                        |                  |
| Empirical formula                 | C <sub>28</sub> H <sub>24</sub> O <sub>2</sub>                              |                  |
| Formula weight                    | 392.47                                                                      |                  |
| Temperature                       | 90(2) K                                                                     |                  |
| Wavelength                        | 0.71073 Å                                                                   |                  |
| Crystal system                    | Triclinic                                                                   |                  |
| Space group                       | P-1                                                                         |                  |
| Unit cell dimensions              | a = 9.5034(17) Å                                                            | α = 96.945(3)°.  |
|                                   | b = 10.6505(19) Å                                                           | β = 102.069(3)°. |
|                                   | c = 21.889(4) Å                                                             | γ = 99.440(3)°.  |
| Volume                            | 2109.3(7) Å <sup>3</sup>                                                    |                  |
| Z, Z'                             | 4, 2                                                                        |                  |
| Density (calculated)              | 1.236 Mg/m <sup>3</sup>                                                     |                  |
| Absorption coefficient            | 0.076 mm <sup>-1</sup>                                                      |                  |
| F(000)                            | 832                                                                         |                  |
| Crystal size                      | 0.781 x 0.652 x 0.320 mm <sup>3</sup>                                       |                  |
| Crystal color and habit           | Colorless Block                                                             |                  |
| Diffractometer                    | Bruker APEX-II CCD                                                          |                  |
| Theta range for data collection   | 1.928 to 27.500°.                                                           |                  |
| Index ranges                      | -12 ≤ h ≤ 12, -13 ≤ k ≤ 13, -28 ≤ l ≤ 28                                    |                  |
| Reflections collected             | 19292                                                                       |                  |
| Independent reflections           | 9689 [R(int) = 0.0110]                                                      |                  |
| Observed reflections (I > 2σ(I))  | 8901                                                                        |                  |
| Completeness to theta = 25.242°   | 100.0 %                                                                     |                  |
| Absorption correction             | Semi-empirical from equivalents                                             |                  |
| Max. and min. transmission        | 0.9673 and 0.8536                                                           |                  |
| Solution method                   | SHELXT (Sheldrick, 2014)                                                    |                  |
| Refinement method                 | SHELXL-2018/3 (Sheldrick, 2018) Full-matrix least-squares on F <sup>2</sup> |                  |
| Data / restraints / parameters    | 9689 / 0 / 733                                                              |                  |
| Goodness-of-fit on F <sup>2</sup> | 1.033                                                                       |                  |
| Final R indices [I > 2σ(I)]       | R1 = 0.0361, wR2 = 0.0932                                                   |                  |
| R indices (all data)              | R1 = 0.0389, wR2 = 0.0959                                                   |                  |
| Largest diff. peak and hole       | 0.377 and -0.199 e.Å <sup>-3</sup>                                          |                  |

Table 2. Atomic coordinates ( × 10<sup>4</sup>) and equivalent isotropic displacement parameters (Å<sup>2</sup> × 10<sup>3</sup>)



for JF2849FMI.  $U(\text{eq})$  is defined as one third of the trace of the orthogonalized  $U^{\text{ij}}$  tensor.

|       | x        | y        | z       | $U(\text{eq})$ |
|-------|----------|----------|---------|----------------|
| C(1)  | 8948(1)  | 9403(1)  | 7555(1) | 15(1)          |
| O(1)  | 8398(1)  | 8243(1)  | 7773(1) | 16(1)          |
| C(2)  | 8142(1)  | 10481(1) | 7747(1) | 15(1)          |
| C(3)  | 8186(1)  | 10582(1) | 8449(1) | 15(1)          |
| C(4)  | 8442(1)  | 9560(1)  | 8777(1) | 16(1)          |
| C(5)  | 8841(1)  | 8364(1)  | 8447(1) | 16(1)          |
| C(6)  | 8416(1)  | 9676(1)  | 9418(1) | 19(1)          |
| C(7)  | 8168(1)  | 10803(1) | 9734(1) | 20(1)          |
| C(8)  | 7934(1)  | 11827(1) | 9409(1) | 20(1)          |
| C(9)  | 7928(1)  | 11708(1) | 8770(1) | 17(1)          |
| C(10) | 8801(1)  | 9101(1)  | 6850(1) | 16(1)          |
| C(11) | 9741(1)  | 9857(1)  | 6568(1) | 20(1)          |
| C(12) | 9635(1)  | 9615(1)  | 5921(1) | 22(1)          |
| C(13) | 8587(1)  | 8588(1)  | 5546(1) | 20(1)          |
| O(13) | 8595(1)  | 8401(1)  | 4914(1) | 30(1)          |
| C(14) | 7630(1)  | 7829(1)  | 5817(1) | 20(1)          |
| C(15) | 7737(1)  | 8101(1)  | 6467(1) | 18(1)          |
| C(16) | 7786(1)  | 7210(1)  | 4544(1) | 31(1)          |
| C(17) | 6574(1)  | 10299(1) | 7358(1) | 16(1)          |
| C(18) | 6222(1)  | 11104(1) | 6916(1) | 23(1)          |
| C(19) | 4795(1)  | 10948(1) | 6552(1) | 29(1)          |
| C(20) | 3703(1)  | 9983(1)  | 6624(1) | 26(1)          |
| C(21) | 4037(1)  | 9176(1)  | 7063(1) | 22(1)          |
| C(22) | 5457(1)  | 9337(1)  | 7430(1) | 19(1)          |
| C(23) | 8168(1)  | 7117(1)  | 8631(1) | 16(1)          |
| C(24) | 6731(1)  | 6502(1)  | 8341(1) | 22(1)          |
| C(25) | 6109(1)  | 5381(1)  | 8528(1) | 25(1)          |
| C(26) | 6909(1)  | 4863(1)  | 9009(1) | 22(1)          |
| C(27) | 8345(1)  | 5460(1)  | 9294(1) | 23(1)          |
| C(28) | 8979(1)  | 6578(1)  | 9103(1) | 20(1)          |
| C(31) | 10312(1) | 5326(1)  | 2419(1) | 17(1)          |
| O(31) | 9509(1)  | 6304(1)  | 2242(1) | 18(1)          |

|       |          |         |         |       |
|-------|----------|---------|---------|-------|
| C(32) | 9229(1)  | 4032(1) | 2356(1) | 16(1) |
| C(33) | 8163(1)  | 3770(1) | 1710(1) | 16(1) |
| C(34) | 7977(1)  | 4746(1) | 1343(1) | 16(1) |
| C(35) | 8860(1)  | 6116(1) | 1581(1) | 17(1) |
| C(36) | 6978(1)  | 4466(1) | 752(1)  | 20(1) |
| C(37) | 6145(1)  | 3235(1) | 530(1)  | 23(1) |
| C(38) | 6312(1)  | 2262(1) | 897(1)  | 23(1) |
| C(39) | 7315(1)  | 2529(1) | 1479(1) | 19(1) |
| C(40) | 11244(1) | 5812(1) | 3079(1) | 17(1) |
| C(41) | 12523(1) | 5348(1) | 3289(1) | 21(1) |
| C(42) | 13411(1) | 5810(1) | 3889(1) | 23(1) |
| C(43) | 13052(1) | 6772(1) | 4286(1) | 20(1) |
| O(43) | 14058(1) | 7234(1) | 4850(1) | 26(1) |
| C(44) | 11756(1) | 7213(1) | 4093(1) | 21(1) |
| C(45) | 10860(1) | 6722(1) | 3493(1) | 20(1) |
| C(46) | 13898(1) | 8405(1) | 5201(1) | 29(1) |
| C(47) | 8443(1)  | 4009(1) | 2894(1) | 16(1) |
| C(48) | 9085(1)  | 3629(1) | 3461(1) | 20(1) |
| C(49) | 8398(1)  | 3640(1) | 3964(1) | 24(1) |
| C(50) | 7046(1)  | 4013(1) | 3906(1) | 26(1) |
| C(51) | 6396(1)  | 4382(1) | 3344(1) | 24(1) |
| C(52) | 7091(1)  | 4385(1) | 2843(1) | 19(1) |
| C(53) | 7915(1)  | 7122(1) | 1482(1) | 17(1) |
| C(54) | 7041(1)  | 7376(1) | 1904(1) | 20(1) |
| C(55) | 6094(1)  | 8235(1) | 1799(1) | 23(1) |
| C(56) | 6016(1)  | 8855(1) | 1272(1) | 25(1) |
| C(57) | 6901(1)  | 8626(1) | 856(1)  | 26(1) |
| C(58) | 7857(1)  | 7767(1) | 962(1)  | 22(1) |

Table 3. Bond lengths [ $\text{\AA}$ ] and angles [ $^\circ$ ] for JF2849FMI.

|            |            |            |            |
|------------|------------|------------|------------|
| C(1)-O(1)  | 1.4353(11) | O(1)-C(5)  | 1.4309(11) |
| C(1)-C(10) | 1.5090(13) | C(2)-C(3)  | 1.5187(13) |
| C(1)-C(2)  | 1.5447(12) | C(2)-C(17) | 1.5234(13) |
| C(1)-H(1)  | 1.002(12)  | C(2)-H(2)  | 0.997(12)  |

|              |            |             |            |
|--------------|------------|-------------|------------|
| C(3)-C(9)    | 1.3996(13) | C(21)-C(22) | 1.3909(14) |
| C(3)-C(4)    | 1.4001(13) | C(21)-H(21) | 0.971(15)  |
| C(4)-C(6)    | 1.3999(13) | C(22)-H(22) | 0.990(13)  |
| C(4)-C(5)    | 1.5292(12) | C(23)-C(24) | 1.3933(14) |
| C(5)-C(23)   | 1.5135(13) | C(23)-C(28) | 1.3956(13) |
| C(5)-H(5)    | 0.998(12)  | C(24)-C(25) | 1.3899(14) |
| C(6)-C(7)    | 1.3913(14) | C(24)-H(24) | 0.972(14)  |
| C(6)-H(6)    | 0.979(13)  | C(25)-C(26) | 1.3894(15) |
| C(7)-C(8)    | 1.3937(14) | C(25)-H(25) | 0.995(16)  |
| C(7)-H(7)    | 0.970(13)  | C(26)-C(27) | 1.3858(16) |
| C(8)-C(9)    | 1.3876(14) | C(26)-H(26) | 0.976(15)  |
| C(8)-H(8)    | 0.982(14)  | C(27)-C(28) | 1.3944(15) |
| C(9)-H(9)    | 0.977(13)  | C(27)-H(27) | 0.987(14)  |
| C(10)-C(15)  | 1.3914(14) | C(28)-H(28) | 0.981(14)  |
| C(10)-C(11)  | 1.3946(13) | C(31)-O(31) | 1.4319(11) |
| C(11)-C(12)  | 1.3868(14) | C(31)-C(40) | 1.5085(13) |
| C(11)-H(11)  | 0.982(14)  | C(31)-C(32) | 1.5506(13) |
| C(12)-C(13)  | 1.3949(15) | C(31)-H(31) | 0.995(12)  |
| C(12)-H(12)  | 0.969(15)  | O(31)-C(35) | 1.4260(12) |
| C(13)-O(13)  | 1.3760(12) | C(32)-C(33) | 1.5219(13) |
| C(13)-C(14)  | 1.3896(14) | C(32)-C(47) | 1.5226(13) |
| O(13)-C(16)  | 1.4237(14) | C(32)-H(32) | 0.996(13)  |
| C(14)-C(15)  | 1.3971(14) | C(33)-C(34) | 1.3990(13) |
| C(14)-H(14)  | 0.971(14)  | C(33)-C(39) | 1.4037(13) |
| C(15)-H(15)  | 0.976(14)  | C(34)-C(36) | 1.4019(14) |
| C(16)-H(16A) | 0.995(16)  | C(34)-C(35) | 1.5283(13) |
| C(16)-H(16B) | 0.995(16)  | C(35)-C(53) | 1.5141(13) |
| C(16)-H(16C) | 0.991(16)  | C(35)-H(35) | 1.006(13)  |
| C(17)-C(18)  | 1.3921(14) | C(36)-C(37) | 1.3879(14) |
| C(17)-C(22)  | 1.3981(13) | C(36)-H(36) | 0.979(14)  |
| C(18)-C(19)  | 1.3944(15) | C(37)-C(38) | 1.3946(15) |
| C(18)-H(18)  | 0.960(15)  | C(37)-H(37) | 0.978(15)  |
| C(19)-C(20)  | 1.3837(17) | C(38)-C(39) | 1.3884(15) |
| C(19)-H(19)  | 0.983(15)  | C(38)-H(38) | 0.979(14)  |
| C(20)-C(21)  | 1.3869(16) | C(39)-H(39) | 0.975(13)  |
| C(20)-H(20)  | 0.984(14)  | C(40)-C(45) | 1.3923(13) |

|              |            |                 |           |
|--------------|------------|-----------------|-----------|
| C(40)-C(41)  | 1.3968(14) |                 |           |
| C(41)-C(42)  | 1.3867(15) | O(1)-C(1)-C(10) | 108.54(7) |
| C(41)-H(41)  | 0.985(14)  | O(1)-C(1)-C(2)  | 109.94(7) |
| C(42)-C(43)  | 1.3954(14) | C(10)-C(1)-C(2) | 113.46(7) |
| C(42)-H(42)  | 0.979(15)  | O(1)-C(1)-H(1)  | 108.5(7)  |
| C(43)-O(43)  | 1.3738(12) | C(10)-C(1)-H(1) | 109.0(7)  |
| C(43)-C(44)  | 1.3914(14) | C(2)-C(1)-H(1)  | 107.3(7)  |
| O(43)-C(46)  | 1.4309(14) | C(5)-O(1)-C(1)  | 111.57(7) |
| C(44)-C(45)  | 1.3941(14) | C(3)-C(2)-C(17) | 111.05(7) |
| C(44)-H(44)  | 0.984(14)  | C(3)-C(2)-C(1)  | 109.03(7) |
| C(45)-H(45)  | 0.959(14)  | C(17)-C(2)-C(1) | 113.56(8) |
| C(46)-H(46A) | 1.008(15)  | C(3)-C(2)-H(2)  | 108.8(7)  |
| C(46)-H(46B) | 0.976(16)  | C(17)-C(2)-H(2) | 107.3(7)  |
| C(46)-H(46C) | 0.994(15)  | C(1)-C(2)-H(2)  | 106.8(7)  |
| C(47)-C(52)  | 1.3939(13) | C(9)-C(3)-C(4)  | 119.36(9) |
| C(47)-C(48)  | 1.3999(14) | C(9)-C(3)-C(2)  | 119.20(8) |
| C(48)-C(49)  | 1.3914(15) | C(4)-C(3)-C(2)  | 121.42(8) |
| C(48)-H(48)  | 0.956(14)  | C(6)-C(4)-C(3)  | 119.49(9) |
| C(49)-C(50)  | 1.3914(16) | C(6)-C(4)-C(5)  | 120.28(8) |
| C(49)-H(49)  | 0.986(14)  | C(3)-C(4)-C(5)  | 120.12(8) |
| C(50)-C(51)  | 1.3876(16) | O(1)-C(5)-C(23) | 107.55(7) |
| C(50)-H(50)  | 0.975(15)  | O(1)-C(5)-C(4)  | 111.53(7) |
| C(51)-C(52)  | 1.3931(14) | C(23)-C(5)-C(4) | 113.59(8) |
| C(51)-H(51)  | 0.981(15)  | O(1)-C(5)-H(5)  | 108.3(7)  |
| C(52)-H(52)  | 0.988(13)  | C(23)-C(5)-H(5) | 108.8(7)  |
| C(53)-C(58)  | 1.3946(14) | C(4)-C(5)-H(5)  | 106.9(7)  |
| C(53)-C(54)  | 1.3972(14) | C(7)-C(6)-C(4)  | 120.60(9) |
| C(54)-C(55)  | 1.3904(14) | C(7)-C(6)-H(6)  | 119.4(8)  |
| C(54)-H(54)  | 0.990(12)  | C(4)-C(6)-H(6)  | 120.0(8)  |
| C(55)-C(56)  | 1.3923(16) | C(6)-C(7)-C(8)  | 119.90(9) |
| C(55)-H(55)  | 0.974(14)  | C(6)-C(7)-H(7)  | 120.8(8)  |
| C(56)-C(57)  | 1.3894(16) | C(8)-C(7)-H(7)  | 119.3(8)  |
| C(56)-H(56)  | 0.982(14)  | C(9)-C(8)-C(7)  | 119.74(9) |
| C(57)-C(58)  | 1.3971(15) | C(9)-C(8)-H(8)  | 120.2(8)  |
| C(57)-H(57)  | 0.972(15)  | C(7)-C(8)-H(8)  | 120.0(8)  |
| C(58)-H(58)  | 0.976(14)  | C(8)-C(9)-C(3)  | 120.88(9) |

|                     |            |                   |            |
|---------------------|------------|-------------------|------------|
| C(8)-C(9)-H(9)      | 121.1(7)   | C(19)-C(20)-C(21) | 119.56(10) |
| C(3)-C(9)-H(9)      | 118.0(7)   | C(19)-C(20)-H(20) | 120.1(8)   |
| C(15)-C(10)-C(11)   | 118.46(9)  | C(21)-C(20)-H(20) | 120.4(8)   |
| C(15)-C(10)-C(1)    | 122.13(8)  | C(20)-C(21)-C(22) | 120.32(10) |
| C(11)-C(10)-C(1)    | 119.40(8)  | C(20)-C(21)-H(21) | 119.9(8)   |
| C(12)-C(11)-C(10)   | 121.10(9)  | C(22)-C(21)-H(21) | 119.8(8)   |
| C(12)-C(11)-H(11)   | 119.6(8)   | C(21)-C(22)-C(17) | 120.71(9)  |
| C(10)-C(11)-H(11)   | 119.3(8)   | C(21)-C(22)-H(22) | 119.5(8)   |
| C(11)-C(12)-C(13)   | 119.71(9)  | C(17)-C(22)-H(22) | 119.8(8)   |
| C(11)-C(12)-H(12)   | 121.6(9)   | C(24)-C(23)-C(28) | 119.02(9)  |
| C(13)-C(12)-H(12)   | 118.7(9)   | C(24)-C(23)-C(5)  | 120.83(8)  |
| O(13)-C(13)-C(14)   | 124.36(9)  | C(28)-C(23)-C(5)  | 120.15(9)  |
| O(13)-C(13)-C(12)   | 115.47(9)  | C(25)-C(24)-C(23) | 120.31(9)  |
| C(14)-C(13)-C(12)   | 120.17(9)  | C(25)-C(24)-H(24) | 119.6(8)   |
| C(13)-O(13)-C(16)   | 117.11(8)  | C(23)-C(24)-H(24) | 120.0(8)   |
| C(13)-C(14)-C(15)   | 119.29(9)  | C(26)-C(25)-C(24) | 120.50(10) |
| C(13)-C(14)-H(14)   | 120.9(8)   | C(26)-C(25)-H(25) | 119.6(9)   |
| C(15)-C(14)-H(14)   | 119.8(8)   | C(24)-C(25)-H(25) | 119.9(9)   |
| C(10)-C(15)-C(14)   | 121.23(9)  | C(27)-C(26)-C(25) | 119.54(10) |
| C(10)-C(15)-H(15)   | 119.5(8)   | C(27)-C(26)-H(26) | 121.1(8)   |
| C(14)-C(15)-H(15)   | 119.2(8)   | C(25)-C(26)-H(26) | 119.3(8)   |
| O(13)-C(16)-H(16A)  | 109.1(9)   | C(26)-C(27)-C(28) | 120.18(9)  |
| O(13)-C(16)-H(16B)  | 105.5(9)   | C(26)-C(27)-H(27) | 120.4(8)   |
| H(16A)-C(16)-H(16B) | 110.7(13)  | C(28)-C(27)-H(27) | 119.5(8)   |
| O(13)-C(16)-H(16C)  | 111.1(9)   | C(27)-C(28)-C(23) | 120.43(9)  |
| H(16A)-C(16)-H(16C) | 111.2(13)  | C(27)-C(28)-H(28) | 120.6(8)   |
| H(16B)-C(16)-H(16C) | 109.1(12)  | C(23)-C(28)-H(28) | 118.9(8)   |
| C(18)-C(17)-C(22)   | 118.31(9)  | O(31)-C(31)-C(40) | 107.15(7)  |
| C(18)-C(17)-C(2)    | 120.00(8)  | O(31)-C(31)-C(32) | 109.62(7)  |
| C(22)-C(17)-C(2)    | 121.70(8)  | C(40)-C(31)-C(32) | 113.98(8)  |
| C(17)-C(18)-C(19)   | 120.91(10) | O(31)-C(31)-H(31) | 108.4(7)   |
| C(17)-C(18)-H(18)   | 118.7(9)   | C(40)-C(31)-H(31) | 109.9(7)   |
| C(19)-C(18)-H(18)   | 120.3(8)   | C(32)-C(31)-H(31) | 107.6(7)   |
| C(20)-C(19)-C(18)   | 120.18(10) | C(35)-O(31)-C(31) | 112.89(7)  |
| C(20)-C(19)-H(19)   | 120.5(9)   | C(33)-C(32)-C(47) | 112.25(8)  |
| C(18)-C(19)-H(19)   | 119.3(9)   | C(33)-C(32)-C(31) | 109.10(8)  |

|                   |            |                     |            |
|-------------------|------------|---------------------|------------|
| C(47)-C(32)-C(31) | 112.31(8)  | C(43)-C(42)-H(42)   | 118.1(9)   |
| C(33)-C(32)-H(32) | 108.9(7)   | O(43)-C(43)-C(44)   | 124.60(9)  |
| C(47)-C(32)-H(32) | 107.5(7)   | O(43)-C(43)-C(42)   | 115.60(9)  |
| C(31)-C(32)-H(32) | 106.6(7)   | C(44)-C(43)-C(42)   | 119.80(9)  |
| C(34)-C(33)-C(39) | 118.79(9)  | C(43)-O(43)-C(46)   | 116.81(9)  |
| C(34)-C(33)-C(32) | 121.58(8)  | C(43)-C(44)-C(45)   | 119.36(9)  |
| C(39)-C(33)-C(32) | 119.61(9)  | C(43)-C(44)-H(44)   | 120.8(8)   |
| C(33)-C(34)-C(36) | 119.83(9)  | C(45)-C(44)-H(44)   | 119.8(8)   |
| C(33)-C(34)-C(35) | 120.58(8)  | C(40)-C(45)-C(44)   | 121.41(9)  |
| C(36)-C(34)-C(35) | 119.60(8)  | C(40)-C(45)-H(45)   | 118.4(8)   |
| O(31)-C(35)-C(53) | 106.56(7)  | C(44)-C(45)-H(45)   | 120.1(8)   |
| O(31)-C(35)-C(34) | 111.45(8)  | O(43)-C(46)-H(46A)  | 111.1(9)   |
| C(53)-C(35)-C(34) | 112.15(8)  | O(43)-C(46)-H(46B)  | 105.0(9)   |
| O(31)-C(35)-H(35) | 108.9(7)   | H(46A)-C(46)-H(46B) | 112.0(12)  |
| C(53)-C(35)-H(35) | 109.5(7)   | O(43)-C(46)-H(46C)  | 111.5(9)   |
| C(34)-C(35)-H(35) | 108.3(7)   | H(46A)-C(46)-H(46C) | 107.7(12)  |
| C(37)-C(36)-C(34) | 120.78(9)  | H(46B)-C(46)-H(46C) | 109.6(12)  |
| C(37)-C(36)-H(36) | 119.8(8)   | C(52)-C(47)-C(48)   | 118.40(9)  |
| C(34)-C(36)-H(36) | 119.4(8)   | C(52)-C(47)-C(32)   | 121.32(9)  |
| C(36)-C(37)-C(38) | 119.61(10) | C(48)-C(47)-C(32)   | 120.27(9)  |
| C(36)-C(37)-H(37) | 119.7(9)   | C(49)-C(48)-C(47)   | 120.81(10) |
| C(38)-C(37)-H(37) | 120.7(9)   | C(49)-C(48)-H(48)   | 119.4(8)   |
| C(39)-C(38)-C(37) | 119.90(9)  | C(47)-C(48)-H(48)   | 119.8(8)   |
| C(39)-C(38)-H(38) | 120.5(8)   | C(50)-C(49)-C(48)   | 120.24(10) |
| C(37)-C(38)-H(38) | 119.6(8)   | C(50)-C(49)-H(49)   | 120.9(8)   |
| C(38)-C(39)-C(33) | 121.08(9)  | C(48)-C(49)-H(49)   | 118.9(8)   |
| C(38)-C(39)-H(39) | 120.2(8)   | C(51)-C(50)-C(49)   | 119.34(10) |
| C(33)-C(39)-H(39) | 118.7(8)   | C(51)-C(50)-H(50)   | 120.2(8)   |
| C(45)-C(40)-C(41) | 118.39(9)  | C(49)-C(50)-H(50)   | 120.5(8)   |
| C(45)-C(40)-C(31) | 121.45(9)  | C(50)-C(51)-C(52)   | 120.47(10) |
| C(41)-C(40)-C(31) | 120.16(9)  | C(50)-C(51)-H(51)   | 121.1(9)   |
| C(42)-C(41)-C(40) | 120.78(9)  | C(52)-C(51)-H(51)   | 118.4(9)   |
| C(42)-C(41)-H(41) | 120.6(8)   | C(51)-C(52)-C(47)   | 120.74(9)  |
| C(40)-C(41)-H(41) | 118.6(8)   | C(51)-C(52)-H(52)   | 119.7(7)   |
| C(41)-C(42)-C(43) | 120.12(9)  | C(47)-C(52)-H(52)   | 119.5(7)   |
| C(41)-C(42)-H(42) | 121.7(9)   | C(58)-C(53)-C(54)   | 119.23(9)  |

|                   |            |                   |            |
|-------------------|------------|-------------------|------------|
| C(58)-C(53)-C(35) | 121.14(9)  | C(57)-C(56)-H(56) | 119.7(8)   |
| C(54)-C(53)-C(35) | 119.59(9)  | C(55)-C(56)-H(56) | 120.5(8)   |
| C(55)-C(54)-C(53) | 120.52(9)  | C(56)-C(57)-C(58) | 120.24(10) |
| C(55)-C(54)-H(54) | 120.3(7)   | C(56)-C(57)-H(57) | 120.2(9)   |
| C(53)-C(54)-H(54) | 119.2(7)   | C(58)-C(57)-H(57) | 119.6(9)   |
| C(54)-C(55)-C(56) | 120.05(10) | C(53)-C(58)-C(57) | 120.15(10) |
| C(54)-C(55)-H(55) | 120.0(8)   | C(53)-C(58)-H(58) | 119.7(8)   |
| C(56)-C(55)-H(55) | 120.0(8)   | C(57)-C(58)-H(58) | 120.1(8)   |
| C(57)-C(56)-C(55) | 119.78(10) |                   |            |

---

Symmetry transformations used to generate equivalent atoms:

Table 4. Anisotropic displacement parameters ( $\text{\AA}^2 \times 10^3$ ) for JF2849FMI. The anisotropic displacement factor exponent takes the form:  $-2\pi^2 [ h^2 a^{*2} U^{11} + \dots + 2 h k a^* b^* U^{12} ]$

|       | $U^{11}$ | $U^{22}$ | $U^{33}$ | $U^{23}$ | $U^{13}$ | $U^{12}$ |
|-------|----------|----------|----------|----------|----------|----------|
| C(1)  | 14(1)    | 15(1)    | 18(1)    | 4(1)     | 5(1)     | 3(1)     |
| O(1)  | 20(1)    | 14(1)    | 15(1)    | 3(1)     | 6(1)     | 4(1)     |
| C(2)  | 14(1)    | 13(1)    | 18(1)    | 3(1)     | 5(1)     | 2(1)     |
| C(3)  | 12(1)    | 15(1)    | 18(1)    | 2(1)     | 4(1)     | 2(1)     |
| C(4)  | 14(1)    | 14(1)    | 18(1)    | 1(1)     | 3(1)     | 2(1)     |
| C(5)  | 16(1)    | 15(1)    | 16(1)    | 3(1)     | 4(1)     | 5(1)     |
| C(6)  | 22(1)    | 16(1)    | 18(1)    | 3(1)     | 4(1)     | 4(1)     |
| C(7)  | 24(1)    | 19(1)    | 17(1)    | 1(1)     | 5(1)     | 4(1)     |
| C(8)  | 21(1)    | 16(1)    | 22(1)    | -1(1)    | 5(1)     | 4(1)     |
| C(9)  | 16(1)    | 14(1)    | 22(1)    | 3(1)     | 4(1)     | 3(1)     |
| C(10) | 15(1)    | 16(1)    | 18(1)    | 4(1)     | 6(1)     | 6(1)     |
| C(11) | 18(1)    | 19(1)    | 22(1)    | 2(1)     | 7(1)     | 1(1)     |
| C(12) | 21(1)    | 23(1)    | 23(1)    | 6(1)     | 10(1)    | 0(1)     |
| C(13) | 22(1)    | 23(1)    | 17(1)    | 4(1)     | 6(1)     | 4(1)     |
| O(13) | 36(1)    | 32(1)    | 17(1)    | 1(1)     | 10(1)    | -7(1)    |
| C(14) | 19(1)    | 20(1)    | 20(1)    | 3(1)     | 3(1)     | 1(1)     |
| C(15) | 17(1)    | 19(1)    | 20(1)    | 6(1)     | 6(1)     | 2(1)     |
| C(16) | 34(1)    | 35(1)    | 20(1)    | -3(1)    | 7(1)     | -3(1)    |
| C(17) | 15(1)    | 16(1)    | 17(1)    | 1(1)     | 5(1)     | 5(1)     |

|       |       |       |       |       |       |       |
|-------|-------|-------|-------|-------|-------|-------|
| C(18) | 20(1) | 27(1) | 25(1) | 11(1) | 8(1)  | 5(1)  |
| C(19) | 25(1) | 41(1) | 26(1) | 15(1) | 6(1)  | 12(1) |
| C(20) | 17(1) | 37(1) | 22(1) | -1(1) | 2(1)  | 8(1)  |
| C(21) | 16(1) | 20(1) | 29(1) | -3(1) | 7(1)  | 2(1)  |
| C(22) | 18(1) | 14(1) | 26(1) | 3(1)  | 7(1)  | 4(1)  |
| C(23) | 19(1) | 14(1) | 16(1) | 1(1)  | 6(1)  | 6(1)  |
| C(24) | 20(1) | 19(1) | 25(1) | 9(1)  | 2(1)  | 5(1)  |
| C(25) | 21(1) | 21(1) | 32(1) | 9(1)  | 2(1)  | 2(1)  |
| C(26) | 26(1) | 17(1) | 25(1) | 7(1)  | 8(1)  | 6(1)  |
| C(27) | 28(1) | 21(1) | 21(1) | 8(1)  | 2(1)  | 8(1)  |
| C(28) | 21(1) | 18(1) | 20(1) | 3(1)  | 1(1)  | 5(1)  |
| C(31) | 14(1) | 16(1) | 21(1) | 2(1)  | 6(1)  | 3(1)  |
| O(31) | 18(1) | 15(1) | 20(1) | 2(1)  | 3(1)  | 4(1)  |
| C(32) | 15(1) | 14(1) | 20(1) | 2(1)  | 5(1)  | 4(1)  |
| C(33) | 15(1) | 17(1) | 18(1) | 1(1)  | 7(1)  | 4(1)  |
| C(34) | 16(1) | 16(1) | 18(1) | 1(1)  | 8(1)  | 4(1)  |
| C(35) | 17(1) | 17(1) | 19(1) | 3(1)  | 7(1)  | 3(1)  |
| C(36) | 24(1) | 20(1) | 18(1) | 3(1)  | 7(1)  | 6(1)  |
| C(37) | 25(1) | 23(1) | 18(1) | -2(1) | 3(1)  | 5(1)  |
| C(38) | 25(1) | 18(1) | 24(1) | -2(1) | 6(1)  | 2(1)  |
| C(39) | 22(1) | 16(1) | 22(1) | 2(1)  | 7(1)  | 4(1)  |
| C(40) | 15(1) | 16(1) | 21(1) | 3(1)  | 6(1)  | 0(1)  |
| C(41) | 18(1) | 21(1) | 24(1) | -1(1) | 6(1)  | 5(1)  |
| C(42) | 18(1) | 26(1) | 25(1) | 2(1)  | 4(1)  | 7(1)  |
| C(43) | 20(1) | 22(1) | 18(1) | 3(1)  | 6(1)  | 0(1)  |
| O(43) | 25(1) | 30(1) | 20(1) | -2(1) | 2(1)  | 5(1)  |
| C(44) | 22(1) | 20(1) | 22(1) | 2(1)  | 10(1) | 4(1)  |
| C(45) | 17(1) | 20(1) | 23(1) | 3(1)  | 7(1)  | 4(1)  |
| C(46) | 31(1) | 27(1) | 25(1) | -4(1) | 6(1)  | -1(1) |
| C(47) | 16(1) | 13(1) | 19(1) | 2(1)  | 4(1)  | 1(1)  |
| C(48) | 16(1) | 19(1) | 24(1) | 6(1)  | 2(1)  | 2(1)  |
| C(49) | 26(1) | 25(1) | 20(1) | 6(1)  | 3(1)  | 1(1)  |
| C(50) | 30(1) | 25(1) | 22(1) | 2(1)  | 12(1) | 3(1)  |
| C(51) | 23(1) | 27(1) | 27(1) | 3(1)  | 10(1) | 9(1)  |
| C(52) | 19(1) | 20(1) | 21(1) | 4(1)  | 5(1)  | 6(1)  |
| C(53) | 17(1) | 13(1) | 21(1) | 2(1)  | 4(1)  | 1(1)  |



|       |       |       |       |       |      |      |
|-------|-------|-------|-------|-------|------|------|
| C(54) | 22(1) | 15(1) | 22(1) | 2(1)  | 6(1) | 3(1) |
| C(55) | 23(1) | 18(1) | 29(1) | 1(1)  | 9(1) | 5(1) |
| C(56) | 23(1) | 16(1) | 36(1) | 6(1)  | 4(1) | 5(1) |
| C(57) | 27(1) | 22(1) | 30(1) | 11(1) | 5(1) | 4(1) |
| C(58) | 24(1) | 21(1) | 25(1) | 7(1)  | 9(1) | 4(1) |

Table 5. Hydrogen coordinates ( $\times 10^4$ ) and isotropic displacement parameters ( $\text{\AA}^2 \times 10^{-3}$ ) for JF2849FMI.

|        | x         | y         | z        | U(eq) |
|--------|-----------|-----------|----------|-------|
| H(1)   | 10011(13) | 9697(11)  | 7770(5)  | 13(3) |
| H(2)   | 8697(13)  | 11302(11) | 7669(5)  | 13(3) |
| H(5)   | 9931(13)  | 8474(11)  | 8570(5)  | 15(3) |
| H(6)   | 8590(14)  | 8965(13)  | 9650(6)  | 22(3) |
| H(7)   | 8146(14)  | 10885(12) | 10178(6) | 23(3) |
| H(8)   | 7755(15)  | 12622(13) | 9631(6)  | 26(3) |
| H(9)   | 7731(14)  | 12400(12) | 8530(6)  | 21(3) |
| H(11)  | 10508(15) | 10556(13) | 6833(6)  | 25(3) |
| H(12)  | 10293(16) | 10128(14) | 5722(7)  | 32(4) |
| H(14)  | 6884(15)  | 7121(13)  | 5560(6)  | 28(3) |
| H(15)  | 7065(15)  | 7567(13)  | 6657(6)  | 27(3) |
| H(16A) | 8147(17)  | 6487(15)  | 4734(7)  | 37(4) |
| H(16B) | 7986(18)  | 7222(15)  | 4116(8)  | 43(4) |
| H(16C) | 6720(17)  | 7143(14)  | 4510(7)  | 37(4) |
| H(18)  | 6978(16)  | 11777(14) | 6870(7)  | 31(3) |
| H(19)  | 4570(17)  | 11540(15) | 6250(7)  | 38(4) |
| H(20)  | 2696(16)  | 9876(13)  | 6367(7)  | 31(4) |
| H(21)  | 3274(16)  | 8498(14)  | 7116(7)  | 30(3) |
| H(22)  | 5673(15)  | 8773(13)  | 7751(6)  | 25(3) |
| H(24)  | 6157(15)  | 6858(13)  | 8007(6)  | 28(3) |
| H(25)  | 5079(17)  | 4952(14)  | 8323(7)  | 36(4) |
| H(26)  | 6441(16)  | 4095(14)  | 9145(7)  | 31(3) |
| H(27)  | 8927(15)  | 5100(13)  | 9634(7)  | 31(4) |

|        |           |          |         |       |
|--------|-----------|----------|---------|-------|
| H(28)  | 10005(15) | 6990(13) | 9294(6) | 28(3) |
| H(31)  | 10949(13) | 5198(11) | 2118(6) | 16(3) |
| H(32)  | 9830(14)  | 3349(12) | 2382(6) | 21(3) |
| H(35)  | 9660(14)  | 6261(12) | 1346(6) | 24(3) |
| H(36)  | 6857(15)  | 5152(13) | 497(6)  | 27(3) |
| H(37)  | 5442(16)  | 3059(14) | 119(7)  | 34(4) |
| H(38)  | 5712(15)  | 1398(14) | 744(6)  | 28(3) |
| H(39)  | 7426(14)  | 1856(13) | 1740(6) | 22(3) |
| H(41)  | 12781(15) | 4682(14) | 3002(7) | 29(3) |
| H(42)  | 14328(16) | 5516(14) | 4036(7) | 34(4) |
| H(44)  | 11479(15) | 7883(13) | 4370(6) | 26(3) |
| H(45)  | 9979(15)  | 7037(13) | 3351(6) | 27(3) |
| H(46A) | 13832(16) | 9101(15) | 4928(7) | 37(4) |
| H(46B) | 14763(17) | 8632(14) | 5553(7) | 38(4) |
| H(46C) | 12998(17) | 8279(14) | 5368(7) | 34(4) |
| H(48)  | 10010(16) | 3364(13) | 3506(6) | 29(3) |
| H(49)  | 8873(16)  | 3359(14) | 4355(7) | 32(4) |
| H(50)  | 6552(16)  | 4006(14) | 4254(7) | 32(4) |
| H(51)  | 5438(17)  | 4637(14) | 3288(7) | 35(4) |
| H(52)  | 6616(14)  | 4645(12) | 2445(6) | 22(3) |
| H(54)  | 7106(13)  | 6940(12) | 2281(6) | 19(3) |
| H(55)  | 5487(15)  | 8406(13) | 2096(7) | 29(3) |
| H(56)  | 5338(16)  | 9452(14) | 1191(7) | 31(4) |
| H(57)  | 6860(16)  | 9063(14) | 489(7)  | 32(4) |
| H(58)  | 8486(15)  | 7614(13) | 672(6)  | 27(3) |

---

Table 6. Torsion angles [°] for JF2849FMI.

|                       |            |                      |            |
|-----------------------|------------|----------------------|------------|
| C(10)-C(1)-O(1)-C(5)  | 164.91(7)  | C(1)-C(2)-C(3)-C(9)  | 161.19(8)  |
| C(2)-C(1)-O(1)-C(5)   | -70.46(9)  | C(17)-C(2)-C(3)-C(4) | 105.38(10) |
| O(1)-C(1)-C(2)-C(3)   | 50.72(10)  | C(1)-C(2)-C(3)-C(4)  | -20.48(11) |
| C(10)-C(1)-C(2)-C(3)  | 172.47(7)  | C(9)-C(3)-C(4)-C(6)  | 0.82(14)   |
| O(1)-C(1)-C(2)-C(17)  | -73.67(10) | C(2)-C(3)-C(4)-C(6)  | -177.51(8) |
| C(10)-C(1)-C(2)-C(17) | 48.08(10)  | C(9)-C(3)-C(4)-C(5)  | -175.38(8) |
| C(17)-C(2)-C(3)-C(9)  | -72.94(10) | C(2)-C(3)-C(4)-C(5)  | 6.30(13)   |

|                         |             |                         |            |
|-------------------------|-------------|-------------------------|------------|
| C(1)-O(1)-C(5)-C(23)    | 178.09(7)   | C(18)-C(19)-C(20)-C(21) | 0.25(17)   |
| C(1)-O(1)-C(5)-C(4)     | 52.93(10)   | C(19)-C(20)-C(21)-C(22) | 0.26(16)   |
| C(6)-C(4)-C(5)-O(1)     | 162.95(8)   | C(20)-C(21)-C(22)-C(17) | -0.93(15)  |
| C(3)-C(4)-C(5)-O(1)     | -20.88(12)  | C(18)-C(17)-C(22)-C(21) | 1.05(14)   |
| C(6)-C(4)-C(5)-C(23)    | 41.22(12)   | C(2)-C(17)-C(22)-C(21)  | -178.99(9) |
| C(3)-C(4)-C(5)-C(23)    | -142.61(9)  | O(1)-C(5)-C(23)-C(24)   | -41.37(11) |
| C(3)-C(4)-C(6)-C(7)     | -1.27(14)   | C(4)-C(5)-C(23)-C(24)   | 82.55(11)  |
| C(5)-C(4)-C(6)-C(7)     | 174.93(9)   | O(1)-C(5)-C(23)-C(28)   | 139.62(9)  |
| C(4)-C(6)-C(7)-C(8)     | 0.37(15)    | C(4)-C(5)-C(23)-C(28)   | -96.45(10) |
| C(6)-C(7)-C(8)-C(9)     | 0.97(15)    | C(28)-C(23)-C(24)-C(25) | 1.16(15)   |
| C(7)-C(8)-C(9)-C(3)     | -1.42(15)   | C(5)-C(23)-C(24)-C(25)  | -177.86(9) |
| C(4)-C(3)-C(9)-C(8)     | 0.52(14)    | C(23)-C(24)-C(25)-C(26) | 0.28(17)   |
| C(2)-C(3)-C(9)-C(8)     | 178.88(9)   | C(24)-C(25)-C(26)-C(27) | -1.05(17)  |
| O(1)-C(1)-C(10)-C(15)   | 26.90(12)   | C(25)-C(26)-C(27)-C(28) | 0.38(16)   |
| C(2)-C(1)-C(10)-C(15)   | -95.62(11)  | C(26)-C(27)-C(28)-C(23) | 1.08(16)   |
| O(1)-C(1)-C(10)-C(11)   | -154.26(8)  | C(24)-C(23)-C(28)-C(27) | -1.84(15)  |
| C(2)-C(1)-C(10)-C(11)   | 83.22(11)   | C(5)-C(23)-C(28)-C(27)  | 177.19(9)  |
| C(15)-C(10)-C(11)-C(12) | -0.71(15)   | C(40)-C(31)-O(31)-C(35) | 165.67(7)  |
| C(1)-C(10)-C(11)-C(12)  | -179.59(9)  | C(32)-C(31)-O(31)-C(35) | -70.17(9)  |
| C(10)-C(11)-C(12)-C(13) | -1.00(16)   | O(31)-C(31)-C(32)-C(33) | 49.41(10)  |
| C(11)-C(12)-C(13)-O(13) | -178.11(9)  | C(40)-C(31)-C(32)-C(33) | 169.48(8)  |
| C(11)-C(12)-C(13)-C(14) | 1.61(16)    | O(31)-C(31)-C(32)-C(47) | -75.70(10) |
| C(14)-C(13)-O(13)-C(16) | -13.47(16)  | C(40)-C(31)-C(32)-C(47) | 44.37(11)  |
| C(12)-C(13)-O(13)-C(16) | 166.24(10)  | C(47)-C(32)-C(33)-C(34) | 108.11(10) |
| O(13)-C(13)-C(14)-C(15) | 179.20(10)  | C(31)-C(32)-C(33)-C(34) | -17.03(12) |
| C(12)-C(13)-C(14)-C(15) | -0.50(15)   | C(47)-C(32)-C(33)-C(39) | -70.26(11) |
| C(11)-C(10)-C(15)-C(14) | 1.85(14)    | C(31)-C(32)-C(33)-C(39) | 164.60(8)  |
| C(1)-C(10)-C(15)-C(14)  | -179.30(9)  | C(39)-C(33)-C(34)-C(36) | -1.28(13)  |
| C(13)-C(14)-C(15)-C(10) | -1.25(15)   | C(32)-C(33)-C(34)-C(36) | -179.66(8) |
| C(3)-C(2)-C(17)-C(18)   | 128.24(9)   | C(39)-C(33)-C(34)-C(35) | 179.04(8)  |
| C(1)-C(2)-C(17)-C(18)   | -108.46(10) | C(32)-C(33)-C(34)-C(35) | 0.66(13)   |
| C(3)-C(2)-C(17)-C(22)   | -51.71(11)  | C(31)-O(31)-C(35)-C(53) | 173.54(7)  |
| C(1)-C(2)-C(17)-C(22)   | 71.59(11)   | C(31)-O(31)-C(35)-C(34) | 50.90(10)  |
| C(22)-C(17)-C(18)-C(19) | -0.54(15)   | C(33)-C(34)-C(35)-O(31) | -15.77(12) |
| C(2)-C(17)-C(18)-C(19)  | 179.50(10)  | C(36)-C(34)-C(35)-O(31) | 164.55(8)  |
| C(17)-C(18)-C(19)-C(20) | -0.11(18)   | C(33)-C(34)-C(35)-C(53) | -135.15(9) |

|                         |            |                         |            |
|-------------------------|------------|-------------------------|------------|
| C(36)-C(34)-C(35)-C(53) | 45.17(12)  | C(33)-C(32)-C(47)-C(52) | -31.26(12) |
| C(33)-C(34)-C(36)-C(37) | 1.43(14)   | C(31)-C(32)-C(47)-C(52) | 92.10(11)  |
| C(35)-C(34)-C(36)-C(37) | -178.89(9) | C(33)-C(32)-C(47)-C(48) | 150.04(9)  |
| C(34)-C(36)-C(37)-C(38) | -0.58(15)  | C(31)-C(32)-C(47)-C(48) | -86.59(11) |
| C(36)-C(37)-C(38)-C(39) | -0.39(16)  | C(52)-C(47)-C(48)-C(49) | -0.64(14)  |
| C(37)-C(38)-C(39)-C(33) | 0.52(15)   | C(32)-C(47)-C(48)-C(49) | 178.09(9)  |
| C(34)-C(33)-C(39)-C(38) | 0.32(14)   | C(47)-C(48)-C(49)-C(50) | 0.91(16)   |
| C(32)-C(33)-C(39)-C(38) | 178.73(9)  | C(48)-C(49)-C(50)-C(51) | -0.43(16)  |
| O(31)-C(31)-C(40)-C(45) | 24.83(12)  | C(49)-C(50)-C(51)-C(52) | -0.29(17)  |
| C(32)-C(31)-C(40)-C(45) | -96.62(11) | C(50)-C(51)-C(52)-C(47) | 0.56(16)   |
| O(31)-C(31)-C(40)-C(41) | -155.36(9) | C(48)-C(47)-C(52)-C(51) | -0.09(15)  |
| C(32)-C(31)-C(40)-C(41) | 83.19(11)  | C(32)-C(47)-C(52)-C(51) | -178.81(9) |
| C(45)-C(40)-C(41)-C(42) | -1.84(15)  | O(31)-C(35)-C(53)-C(58) | 139.94(9)  |
| C(31)-C(40)-C(41)-C(42) | 178.35(9)  | C(34)-C(35)-C(53)-C(58) | -97.85(11) |
| C(40)-C(41)-C(42)-C(43) | -1.54(16)  | O(31)-C(35)-C(53)-C(54) | -42.58(11) |
| C(41)-C(42)-C(43)-O(43) | -175.21(9) | C(34)-C(35)-C(53)-C(54) | 79.62(11)  |
| C(41)-C(42)-C(43)-C(44) | 3.79(16)   | C(58)-C(53)-C(54)-C(55) | 1.71(15)   |
| C(44)-C(43)-O(43)-C(46) | -12.78(15) | C(35)-C(53)-C(54)-C(55) | -175.81(9) |
| C(42)-C(43)-O(43)-C(46) | 166.16(10) | C(53)-C(54)-C(55)-C(56) | -0.32(15)  |
| O(43)-C(43)-C(44)-C(45) | 176.30(9)  | C(54)-C(55)-C(56)-C(57) | -0.87(16)  |
| C(42)-C(43)-C(44)-C(45) | -2.60(15)  | C(55)-C(56)-C(57)-C(58) | 0.67(17)   |
| C(41)-C(40)-C(45)-C(44) | 3.05(15)   | C(54)-C(53)-C(58)-C(57) | -1.91(15)  |
| C(31)-C(40)-C(45)-C(44) | -177.15(9) | C(35)-C(53)-C(58)-C(57) | 175.58(9)  |
| C(43)-C(44)-C(45)-C(40) | -0.84(15)  | C(56)-C(57)-C(58)-C(53) | 0.73(16)   |

---

Symmetry transformations used to generate equivalent atoms:

Table 7. Hydrogen bonds for JF2849FMI [ $\text{\AA}$  and  $^\circ$ ].

| D-H...A               | d(D-H)    | d(H...A)  | d(D...A)   | $\angle$ (DHA) |
|-----------------------|-----------|-----------|------------|----------------|
| C(12)-H(12)...O(13)#1 | 0.969(15) | 2.472(15) | 3.4189(13) | 165.6(12)      |

---

Symmetry transformations used to generate equivalent atoms:

#1 -x+2,-y+2,-z+1

**TETRAHYDROISOQUINOLINE 23c**Table 1. Crystal data and structure refinement for [C<sub>18</sub> H<sub>17</sub> N O<sub>2</sub>].

|                                   |                                                                                                   |
|-----------------------------------|---------------------------------------------------------------------------------------------------|
| Identification code               | JF2851CuFMI                                                                                       |
| Empirical formula                 | C <sub>18</sub> H <sub>17</sub> N O <sub>2</sub>                                                  |
| Formula weight                    | 279.32                                                                                            |
| Temperature                       | 90(2) K                                                                                           |
| Wavelength                        | 1.54178 Å                                                                                         |
| Crystal system                    | Orthorhombic                                                                                      |
| Space group                       | P2 <sub>1</sub> 2 <sub>1</sub> 2 <sub>1</sub>                                                     |
| Unit cell dimensions              | a = 9.0262(4) Å      α = 90°.<br>b = 10.7097(4) Å      β = 90°.<br>c = 14.6781(6) Å      γ = 90°. |
| Volume                            | 1418.90(10) Å <sup>3</sup>                                                                        |
| Z                                 | 4                                                                                                 |
| Density (calculated)              | 1.308 Mg/m <sup>3</sup>                                                                           |
| Absorption coefficient            | 0.679 mm <sup>-1</sup>                                                                            |
| F(000)                            | 592                                                                                               |
| Crystal size                      | 0.764 x 0.170 x 0.115 mm <sup>3</sup>                                                             |
| Crystal color and habit           | Colorless Rod                                                                                     |
| Diffractometer                    | Bruker APEX-II CCD                                                                                |
| Theta range for data collection   | 5.112 to 72.141°.                                                                                 |
| Index ranges                      | -10 ≤ h ≤ 11, -13 ≤ k ≤ 13, -18 ≤ l ≤ 17                                                          |
| Reflections collected             | 7991                                                                                              |
| Independent reflections           | 2743 [R(int) = 0.0192]                                                                            |
| Observed reflections (I > 2σ(I))  | 2718                                                                                              |
| Completeness to theta = 67.679°   | 99.9 %                                                                                            |
| Absorption correction             | Semi-empirical from equivalents                                                                   |
| Max. and min. transmission        | 0.8416 and 0.7268                                                                                 |
| Solution method                   | SHELXT (Sheldrick, 2014)                                                                          |
| Refinement method                 | SHELXL-2018/3 (Sheldrick, 2018) Full-matrix least-squares on F <sup>2</sup>                       |
| Data / restraints / parameters    | 2743 / 0 / 259                                                                                    |
| Goodness-of-fit on F <sup>2</sup> | 1.065                                                                                             |
| Final R indices [I > 2σ(I)]       | R1 = 0.0262, wR2 = 0.0696                                                                         |
| R indices (all data)              | R1 = 0.0263, wR2 = 0.0697                                                                         |

|                               |                                                 |
|-------------------------------|-------------------------------------------------|
| Absolute structure parameters | Flack: 0.03(5), Parsons: 0.02(5), Hoof: 0.01(4) |
| Extinction coefficient        | 0.0028(5)                                       |
| Largest diff. peak and hole   | 0.252 and -0.156 e.Å <sup>-3</sup>              |

Table 2. Atomic coordinates ( x 10<sup>4</sup>) and equivalent isotropic displacement parameters (Å<sup>2</sup>x 10<sup>3</sup>) for JF2851CUFMI. U(eq) is defined as one third of the trace of the orthogonalized U<sup>ij</sup> tensor.

|       | x        | y       | z       | U(eq) |
|-------|----------|---------|---------|-------|
| C(1)  | 4352(2)  | 4795(2) | 2561(1) | 20(1) |
| N(1)  | 4914(1)  | 5433(1) | 3279(1) | 18(1) |
| O(1)  | 3344(1)  | 4045(1) | 2633(1) | 27(1) |
| C(2)  | 5906(2)  | 6058(2) | 1605(1) | 23(1) |
| O(2)  | 4935(1)  | 4991(1) | 1724(1) | 25(1) |
| C(3)  | 7035(2)  | 6077(1) | 2359(1) | 20(1) |
| C(4)  | 6239(2)  | 6233(1) | 3261(1) | 17(1) |
| C(5)  | 7234(2)  | 5947(1) | 4090(1) | 16(1) |
| C(6)  | 6339(2)  | 6123(1) | 4952(1) | 18(1) |
| C(7)  | 7008(2)  | 6565(1) | 5746(1) | 21(1) |
| C(8)  | 6194(2)  | 6717(1) | 6539(1) | 24(1) |
| C(9)  | 4690(2)  | 6414(1) | 6545(1) | 24(1) |
| C(10) | 4016(2)  | 5996(1) | 5755(1) | 22(1) |
| C(11) | 4830(2)  | 5847(1) | 4952(1) | 18(1) |
| C(12) | 4048(2)  | 5342(1) | 4124(1) | 20(1) |
| C(13) | 7998(2)  | 4682(1) | 4067(1) | 17(1) |
| C(14) | 7227(2)  | 3561(1) | 4164(1) | 18(1) |
| C(15) | 7961(2)  | 2418(1) | 4145(1) | 20(1) |
| C(16) | 9491(2)  | 2379(2) | 4038(1) | 21(1) |
| C(17) | 10279(2) | 3485(2) | 3955(1) | 22(1) |
| C(18) | 9536(2)  | 4626(2) | 3965(1) | 19(1) |

Table 3. Bond lengths [Å] and angles [°] for JF2851CUFMI.

|           |            |            |            |
|-----------|------------|------------|------------|
| C(1)-O(1) | 1.2180(19) | C(1)-N(1)  | 1.354(2)   |
| C(1)-O(2) | 1.3534(19) | N(1)-C(12) | 1.4697(19) |

|              |            |                  |            |
|--------------|------------|------------------|------------|
| N(1)-C(4)    | 1.4712(18) | C(18)-H(18)      | 0.95(2)    |
| C(2)-O(2)    | 1.4511(19) |                  |            |
| C(2)-C(3)    | 1.505(2)   | O(1)-C(1)-O(2)   | 118.09(14) |
| C(2)-H(2A)   | 0.98(2)    | O(1)-C(1)-N(1)   | 123.04(14) |
| C(2)-H(2B)   | 0.98(2)    | O(2)-C(1)-N(1)   | 118.86(13) |
| C(3)-C(4)    | 1.515(2)   | C(1)-N(1)-C(12)  | 115.12(12) |
| C(3)-H(3A)   | 1.01(2)    | C(1)-N(1)-C(4)   | 125.73(13) |
| C(3)-H(3B)   | 0.97(2)    | C(12)-N(1)-C(4)  | 119.08(12) |
| C(4)-C(5)    | 1.544(2)   | O(2)-C(2)-C(3)   | 109.33(12) |
| C(4)-H(4)    | 0.976(19)  | O(2)-C(2)-H(2A)  | 108.9(11)  |
| C(5)-C(6)    | 1.513(2)   | C(3)-C(2)-H(2A)  | 110.2(11)  |
| C(5)-C(13)   | 1.520(2)   | O(2)-C(2)-H(2B)  | 106.3(12)  |
| C(5)-H(5)    | 0.939(19)  | C(3)-C(2)-H(2B)  | 111.1(12)  |
| C(6)-C(11)   | 1.393(2)   | H(2A)-C(2)-H(2B) | 111.0(16)  |
| C(6)-C(7)    | 1.396(2)   | C(1)-O(2)-C(2)   | 117.80(12) |
| C(7)-C(8)    | 1.385(2)   | C(2)-C(3)-C(4)   | 108.86(13) |
| C(7)-H(7)    | 0.97(2)    | C(2)-C(3)-H(3A)  | 110.7(11)  |
| C(8)-C(9)    | 1.396(3)   | C(4)-C(3)-H(3A)  | 108.9(11)  |
| C(8)-H(8)    | 0.99(2)    | C(2)-C(3)-H(3B)  | 109.5(12)  |
| C(9)-C(10)   | 1.384(2)   | C(4)-C(3)-H(3B)  | 111.7(12)  |
| C(9)-H(9)    | 1.00(2)    | H(3A)-C(3)-H(3B) | 107.1(15)  |
| C(10)-C(11)  | 1.397(2)   | N(1)-C(4)-C(3)   | 109.73(12) |
| C(10)-H(10)  | 0.96(2)    | N(1)-C(4)-C(5)   | 110.07(11) |
| C(11)-C(12)  | 1.506(2)   | C(3)-C(4)-C(5)   | 113.01(12) |
| C(12)-H(12A) | 0.962(19)  | N(1)-C(4)-H(4)   | 108.4(11)  |
| C(12)-H(12B) | 0.97(2)    | C(3)-C(4)-H(4)   | 108.5(11)  |
| C(13)-C(14)  | 1.395(2)   | C(5)-C(4)-H(4)   | 107.0(11)  |
| C(13)-C(18)  | 1.398(2)   | C(6)-C(5)-C(13)  | 111.83(12) |
| C(14)-C(15)  | 1.391(2)   | C(6)-C(5)-C(4)   | 108.86(12) |
| C(14)-H(14)  | 0.93(2)    | C(13)-C(5)-C(4)  | 115.04(12) |
| C(15)-C(16)  | 1.391(2)   | C(6)-C(5)-H(5)   | 108.4(11)  |
| C(15)-H(15)  | 1.00(2)    | C(13)-C(5)-H(5)  | 106.7(11)  |
| C(16)-C(17)  | 1.387(2)   | C(4)-C(5)-H(5)   | 105.6(11)  |
| C(16)-H(16)  | 0.98(2)    | C(11)-C(6)-C(7)  | 119.64(14) |
| C(17)-C(18)  | 1.393(2)   | C(11)-C(6)-C(5)  | 119.76(13) |
| C(17)-H(17)  | 0.96(2)    | C(7)-C(6)-C(5)   | 120.60(14) |

|                    |            |                     |            |
|--------------------|------------|---------------------|------------|
| C(8)-C(7)-C(6)     | 120.76(15) | H(12A)-C(12)-H(12B) | 106.6(16)  |
| C(8)-C(7)-H(7)     | 120.6(12)  | C(14)-C(13)-C(18)   | 118.00(14) |
| C(6)-C(7)-H(7)     | 118.7(12)  | C(14)-C(13)-C(5)    | 122.59(12) |
| C(7)-C(8)-C(9)     | 119.58(15) | C(18)-C(13)-C(5)    | 119.40(14) |
| C(7)-C(8)-H(8)     | 118.7(13)  | C(15)-C(14)-C(13)   | 121.14(13) |
| C(9)-C(8)-H(8)     | 121.7(13)  | C(15)-C(14)-H(14)   | 118.3(12)  |
| C(10)-C(9)-C(8)    | 119.86(14) | C(13)-C(14)-H(14)   | 120.4(12)  |
| C(10)-C(9)-H(9)    | 118.2(11)  | C(16)-C(15)-C(14)   | 120.14(14) |
| C(8)-C(9)-H(9)     | 121.9(11)  | C(16)-C(15)-H(15)   | 120.3(12)  |
| C(9)-C(10)-C(11)   | 120.77(15) | C(14)-C(15)-H(15)   | 119.5(12)  |
| C(9)-C(10)-H(10)   | 118.7(12)  | C(17)-C(16)-C(15)   | 119.51(15) |
| C(11)-C(10)-H(10)  | 120.5(12)  | C(17)-C(16)-H(16)   | 120.3(12)  |
| C(6)-C(11)-C(10)   | 119.37(14) | C(15)-C(16)-H(16)   | 120.2(12)  |
| C(6)-C(11)-C(12)   | 122.25(13) | C(16)-C(17)-C(18)   | 120.10(13) |
| C(10)-C(11)-C(12)  | 118.33(14) | C(16)-C(17)-H(17)   | 120.3(12)  |
| N(1)-C(12)-C(11)   | 114.12(12) | C(18)-C(17)-H(17)   | 119.6(12)  |
| N(1)-C(12)-H(12A)  | 107.1(11)  | C(17)-C(18)-C(13)   | 121.11(14) |
| C(11)-C(12)-H(12A) | 109.5(11)  | C(17)-C(18)-H(18)   | 120.6(12)  |
| N(1)-C(12)-H(12B)  | 109.5(11)  | C(13)-C(18)-H(18)   | 118.3(12)  |
| C(11)-C(12)-H(12B) | 109.8(11)  |                     |            |

---

Symmetry transformations used to generate equivalent atoms:

Table 4. Anisotropic displacement parameters ( $\text{\AA}^2 \times 10^3$ ) for JF2851CUFMI. The anisotropic displacement factor exponent takes the form:  $-2\pi^2 [h^2 a^{*2} U^{11} + \dots + 2 h k a^* b^* U^{12}]$

|      | $U^{11}$ | $U^{22}$ | $U^{33}$ | $U^{23}$ | $U^{13}$ | $U^{12}$ |
|------|----------|----------|----------|----------|----------|----------|
| C(1) | 18(1)    | 19(1)    | 23(1)    | -2(1)    | -1(1)    | 2(1)     |
| N(1) | 18(1)    | 17(1)    | 19(1)    | 0(1)     | 0(1)     | -1(1)    |
| O(1) | 25(1)    | 26(1)    | 32(1)    | -6(1)    | 0(1)     | -7(1)    |
| C(2) | 28(1)    | 24(1)    | 17(1)    | 1(1)     | 1(1)     | 0(1)     |
| O(2) | 28(1)    | 27(1)    | 20(1)    | -4(1)    | -1(1)    | -4(1)    |
| C(3) | 22(1)    | 19(1)    | 19(1)    | 1(1)     | 3(1)     | 0(1)     |
| C(4) | 17(1)    | 14(1)    | 19(1)    | 1(1)     | 1(1)     | -2(1)    |
| C(5) | 17(1)    | 15(1)    | 18(1)    | 0(1)     | 1(1)     | -3(1)    |



|       |       |       |       |       |       |       |
|-------|-------|-------|-------|-------|-------|-------|
| C(6)  | 22(1) | 12(1) | 19(1) | 1(1)  | 2(1)  | 2(1)  |
| C(7)  | 25(1) | 18(1) | 22(1) | 1(1)  | -2(1) | 3(1)  |
| C(8)  | 33(1) | 20(1) | 19(1) | -1(1) | -2(1) | 5(1)  |
| C(9)  | 34(1) | 19(1) | 19(1) | 2(1)  | 6(1)  | 9(1)  |
| C(10) | 23(1) | 16(1) | 26(1) | 3(1)  | 5(1)  | 5(1)  |
| C(11) | 22(1) | 12(1) | 21(1) | 3(1)  | 2(1)  | 3(1)  |
| C(12) | 16(1) | 21(1) | 23(1) | 0(1)  | 4(1)  | 0(1)  |
| C(13) | 18(1) | 19(1) | 13(1) | 0(1)  | 0(1)  | -1(1) |
| C(14) | 17(1) | 19(1) | 19(1) | 2(1)  | 1(1)  | -1(1) |
| C(15) | 22(1) | 19(1) | 21(1) | 2(1)  | 0(1)  | -2(1) |
| C(16) | 23(1) | 22(1) | 19(1) | 2(1)  | -1(1) | 4(1)  |
| C(17) | 16(1) | 28(1) | 21(1) | 1(1)  | -1(1) | 3(1)  |
| C(18) | 18(1) | 21(1) | 18(1) | 0(1)  | 1(1)  | -3(1) |

Table 5. Hydrogen coordinates ( $\times 10^4$ ) and isotropic displacement parameters ( $\text{\AA}^2 \times 10^{-3}$ ) for JF2851CUFMI.

|        | x         | y        | z        | U(eq) |
|--------|-----------|----------|----------|-------|
| H(2A)  | 5310(20)  | 6821(18) | 1619(13) | 23(5) |
| H(2B)  | 6380(20)  | 5951(19) | 1011(14) | 26(5) |
| H(3A)  | 7740(20)  | 6792(19) | 2276(13) | 21(5) |
| H(3B)  | 7610(20)  | 5320(20) | 2342(14) | 25(5) |
| H(4)   | 5920(20)  | 7100(18) | 3317(12) | 19(4) |
| H(5)   | 7990(20)  | 6552(17) | 4078(13) | 17(4) |
| H(7)   | 8060(20)  | 6760(20) | 5735(14) | 27(5) |
| H(8)   | 6700(20)  | 7030(20) | 7090(15) | 33(5) |
| H(9)   | 4080(20)  | 6480(18) | 7108(14) | 21(4) |
| H(10)  | 2990(20)  | 5790(18) | 5772(13) | 22(5) |
| H(12A) | 3820(20)  | 4474(18) | 4216(12) | 17(4) |
| H(12B) | 3110(20)  | 5766(18) | 4046(13) | 20(4) |
| H(14)  | 6220(20)  | 3563(17) | 4279(13) | 24(5) |
| H(15)  | 7380(20)  | 1630(20) | 4191(14) | 28(5) |
| H(16)  | 10010(20) | 1571(18) | 4033(13) | 24(5) |

|       |           |          |          |       |
|-------|-----------|----------|----------|-------|
| H(17) | 11340(20) | 3471(18) | 3906(13) | 24(5) |
| H(18) | 10070(20) | 5390(19) | 3916(12) | 24(5) |

Table 6. Torsion angles [°] for JF2851CUFMI.

|                       |             |                         |             |
|-----------------------|-------------|-------------------------|-------------|
| O(1)-C(1)-N(1)-C(12)  | -11.1(2)    | C(7)-C(8)-C(9)-C(10)    | -1.7(2)     |
| O(2)-C(1)-N(1)-C(12)  | 169.20(12)  | C(8)-C(9)-C(10)-C(11)   | 1.4(2)      |
| O(1)-C(1)-N(1)-C(4)   | 172.15(14)  | C(7)-C(6)-C(11)-C(10)   | -1.2(2)     |
| O(2)-C(1)-N(1)-C(4)   | -7.6(2)     | C(5)-C(6)-C(11)-C(10)   | 179.10(13)  |
| O(1)-C(1)-O(2)-C(2)   | 167.33(14)  | C(7)-C(6)-C(11)-C(12)   | -178.71(14) |
| N(1)-C(1)-O(2)-C(2)   | -12.9(2)    | C(5)-C(6)-C(11)-C(12)   | 1.6(2)      |
| C(3)-C(2)-O(2)-C(1)   | 48.10(18)   | C(9)-C(10)-C(11)-C(6)   | 0.1(2)      |
| O(2)-C(2)-C(3)-C(4)   | -62.50(15)  | C(9)-C(10)-C(11)-C(12)  | 177.65(13)  |
| C(1)-N(1)-C(4)-C(3)   | -9.14(19)   | C(1)-N(1)-C(12)-C(11)   | 168.95(12)  |
| C(12)-N(1)-C(4)-C(3)  | 174.18(12)  | C(4)-N(1)-C(12)-C(11)   | -14.03(18)  |
| C(1)-N(1)-C(4)-C(5)   | -134.12(14) | C(6)-C(11)-C(12)-N(1)   | -13.0(2)    |
| C(12)-N(1)-C(4)-C(5)  | 49.21(16)   | C(10)-C(11)-C(12)-N(1)  | 169.48(12)  |
| C(2)-C(3)-C(4)-N(1)   | 42.77(15)   | C(6)-C(5)-C(13)-C(14)   | 55.33(18)   |
| C(2)-C(3)-C(4)-C(5)   | 166.03(12)  | C(4)-C(5)-C(13)-C(14)   | -69.53(18)  |
| N(1)-C(4)-C(5)-C(6)   | -56.69(14)  | C(6)-C(5)-C(13)-C(18)   | -123.24(15) |
| C(3)-C(4)-C(5)-C(6)   | -179.76(12) | C(4)-C(5)-C(13)-C(18)   | 111.90(15)  |
| N(1)-C(4)-C(5)-C(13)  | 69.70(15)   | C(18)-C(13)-C(14)-C(15) | -1.1(2)     |
| C(3)-C(4)-C(5)-C(13)  | -53.37(16)  | C(5)-C(13)-C(14)-C(15)  | -179.69(14) |
| C(13)-C(5)-C(6)-C(11) | -94.97(15)  | C(13)-C(14)-C(15)-C(16) | 0.8(2)      |
| C(4)-C(5)-C(6)-C(11)  | 33.25(17)   | C(14)-C(15)-C(16)-C(17) | 0.2(2)      |
| C(13)-C(5)-C(6)-C(7)  | 85.36(16)   | C(15)-C(16)-C(17)-C(18) | -0.9(2)     |
| C(4)-C(5)-C(6)-C(7)   | -146.42(13) | C(16)-C(17)-C(18)-C(13) | 0.6(2)      |
| C(11)-C(6)-C(7)-C(8)  | 0.9(2)      | C(14)-C(13)-C(18)-C(17) | 0.4(2)      |
| C(5)-C(6)-C(7)-C(8)   | -179.40(13) | C(5)-C(13)-C(18)-C(17)  | 179.02(13)  |
| C(6)-C(7)-C(8)-C(9)   | 0.5(2)      |                         |             |

Symmetry transformations used to generate equivalent atoms:

Table 7. Hydrogen bonds for JF2851CUFMI [Å and °].

| D-H...A             | d(D-H)    | d(H...A)  | d(D...A)   | <(DHA)    |
|---------------------|-----------|-----------|------------|-----------|
| C(3)-H(3A)...O(1)#1 | 1.01(2)   | 2.61(2)   | 3.1964(19) | 117.2(13) |
| C(4)-H(4)...O(1)#1  | 0.976(19) | 2.592(19) | 3.3063(18) | 130.2(14) |

Symmetry transformations used to generate equivalent atoms:

#1 -x+1,y+1/2,-z+1/2

References:

- (1) Armstrong, R. J.; Smith, M. D. *Angew. Chem. Int. Ed.* **2014**, *53*, 12822–12826.
- (2) Xing, X.; O'Connor, N. R.; Stoltz, B. M. *Angew. Chem. Int. Ed.* **2015**, *54*, 11186–11190.
- (3) Martinelli, J. R.; Watson, D. A.; Freckmann, D. M. M.; Barder, T. E.; Buchwald, S. L. *J. Org. Chem.* **2008**, *73*, 7102–7107.
- (4) Adler, M. J.; Hamilton, A. D. *J. Org. Chem.* **2011**, *76*, 7040–7047.
- (5) Terada, M.; Li, F.; Toda, Y. *Angew. Chem. Int. Ed.* **2014**, *53*, 235–239.
- (6) Suchand, B.; Satyanarayana, G. *J. Org. Chem.* **2016**, *81*, 6409–6423.
- (7) Souza, L. W.; Squitieri, R. A.; Dimirjian, C. A.; Hodur, B. M.; Nickerson, L. A.; Penrod, C. N.; Cordova, J.; Fettingner, J. C.; Shaw, J. T. *Angew. Chem. Int. Ed.* **2018**, *57*, 15213–15216.
- (8) Soldi, C.; Lamb, K. N.; Squitieri, R. A.; González-López, M.; Di Maso, M. J.; Shaw, J. T. *J. Am. Chem. Soc.* **2014**, *136*, 15142–15145.
- (9) Ackermann, M.; Bucher, J.; Rappold, M.; Graf, K.; Rominger, F.; Hashmi, A. S. K. *Chem. Asian J.* **2013**, *8*, 1786–1794.
- (10) Phetcharawetch, J.; Betterley, N. M.; Soorukram, D.; Pohmakotr, M.; Reutrakul, V.; Kuhakarn, C. *Eur. J. Org. Chem.* **2017**, *2017*, 6840–6850.
- (11) Métay, E.; Léonel, E.; Sulpice-Gaillet, C.; Nédélec, J.-Y. *Synthesis* **2005**, No. 10, 1682–1688.
- (12) Niu, T.; Wang, K.-H.; Huang, D.; Xu, C.; Su, Y.; Hu, Y.; Fu, Y. *Synthesis* **2013**, *46*, 320–330.
- (13) Niu, T.; Wang, K.-H.; Huang, D.; Xu, C.; Su, Y.; Hu, Y.; Fu, Y. *Synthesis* **2013**, *46*, 320–330.
- (14) Zheng, H.-X.; Shan, X.-H.; Qu, J.-P.; Kang, Y.-B. *Org. Lett.* **2018**, *20*, 3310–3313.
- (15) Schulte, B.; Fröhlich, R.; Studer, A. *Tetrahedron* **2008**, *64*, 11852–11859.
- (16) Asami, M.; Wada, M.; Furuya, S. *Chem. Lett.* **2001**, *30*, 1110–1111.
- (17) Gao, Q.; Xu, S. *Org. Biomol. Chem.* **2018**, *16*, 208–212.
- (18) Landge, K. P.; Jang, K. S.; Lee, S. Y.; Chi, D. Y. *J. Org. Chem.* **2012**, *77*, 5705–5713.
- (19) Konishi, H.; Tanaka, H.; Manabe, K. *Org. Lett.* **2017**, *19*, 1578–1581.
- (20) Zhang, X.; Glunz, P. W.; Johnson, J. A.; Jiang, W.; Jacutin-Porte, S.; Ladziata, V.; Zou, Y.; Phillips, M. S.; Wurtz, N. R.; Parkhurst, B.; et al. *J. Med. Chem.* **2016**, *59*, 7125–7137.
- (21) Ueda, I.; Miyawaki, K.; Ueno, F. *Heterocycles* **2001**, *54*, 887.
- (22) Gaertzen, O.; Buchwald, S. L. *J. Org. Chem.* **2001**, *67*, 465–475.
- (23) Padwa, A.; Beall, L. S.; Eidell, C. K.; Worsencroft, K. J. *J. Org. Chem.* **2001**, *66*, 2414–2421.
- (24) Ghigo, G.; Cagnina, S.; Maranzana, A.; Tonachini, G. *J. Org. Chem.* **2010**, *75*, 3608–3617.

- (25) Hock, K. J.; Koenigs, R. M. *Angew. Chem. Int. Ed.* **2017**, *56*, 13566–13568.
- (26) Zhang, Z.; Sheng, Z.; Yu, W.; Wu, G.; Zhang, R.; Chu, W. D.; Zhang, Y.; Wang, J. *Nat. Chem.* **2017**.
- (27) Harrison, J. G.; Gutierrez, O.; Jana, N.; Driver, T. G.; Tantillo, D. J. *J. Am. Chem. Soc.* **2016**, *138*, 487–490.
- (28) Ogunlana, A. A.; Zou, J.; Bao, X. **2019**.
- (29) Frisch, M. J.; Trucks, G. W.; Schlegel, H. B.; Scuseria, G. E. ; Robb, G. E.; Cheeseman, J. R.; Scalmani, G.; Barone, V.; Mennucci, B. ; Petersson, G. A.; Nakatsuji, H.; Caricato, M.; Li, X.; Hratchian, H. P. ; Izmaylov, A. F.; Bloino, J.; Zheng, G.; Sonnenberg, J. L.; Hada, M. ; Ehara, M.; Toyota, K.; Fukuda, R.; Hasegawa, J.; Ishida, M.; Nakajima, T. ; Honda, Y.; Kitao, O.; Nakai, H.; Vreven, T.; Montgomery, Jr., J. A. . P.; J. E.; Ogliaro, F.; Bearpark, M.; Heyd, J. J.; Brothers, E. . K.; K. N.; Staroverov, V. N.; Keith, T.; Kobayashi, R.; Normand, J. . R.; K.; Rendell, A.; Burant, J. C.; Iyengar, S. S.; Tomasi, J. . C.; M.; Rega, N.; Millam, J. M.; Klene, M.; Knox, J. E.; Cross, J. B. . ; et al. *Gaussian Inc.* Wallingford, CT 2009.
- (30) Lee, C.; Yang, W.; Parr, R. G. *Phys. Rev. B* **1988**, *37*, 785–789.
- (31) Hariharan, P. C.; Pople, J. A. *Theor. Chim. Acta* **1973**, *28*, 213–222.
- (32) Hay, P. J.; Wadt, W. R.; Hay, P. J.; Wadt, W. R. *J. Chem. Phys.* **1985**, *82*, 270.
- (33) Grimme, S.; Antony, J.; Ehrlich, S.; Krieg, H. *J. Chem. Phys.* **2010**.
- (34) Grimme, S.; Ehrlich, S.; Goerigk, L. *J. Comput. Chem.* **2011**.
- (35) Zhao, Y.; Truhlar, D. G. *Theor. Chem. Acc.* **2008**, *120*, 215–241.
- (36) Chai, J. Da; Head-Gordon, M. *Phys. Chem. Chem. Phys.* **2008**.
- (37) Bhakat, S. *J. Chem. Pharm. Res.* **2011**, *3*, 115–121.
- (38) Pine, S. H. *J. Chem. Educ.* **2011**, *48*, 99.
- (39) Woodward, R. B.; Hoffmann, R. *Angew. Chem. Int. Ed.* **1969**, *8*, 781–932.
- (40) Campbell, A.; Houston, A. H. J.; Kenyon, J. *J. Chem. Soc.* **1947**.

## Experimental Details

**HPLC Sample Preparation:** Approximately 4-5 mgs of the compound to be analyzed was weighed into a vial. The sample was dissolved in a mixture of 10% isopropanol/hexanes solution such that the concentration was 1 mg/mL. The solution was mixed vigorously using a combination of sonication and vortexing. About 2 mL of the solution was taken up in a syringe, which was then fitted with a filter prior to loading a 1.5 mL HPLC vial with the sample.

**HPLC Methods and Materials:** Enantiomer ratios were determined by chiral HPLC with one of the following columns (denoted as AD, AS, or OD on individual HPLC traces): AD = Phenomenex Lux<sup>®</sup>, 5 $\mu$ m Amylose-1 LC Column, 250x4.6mm, part #: 00G-4732-E0; AS = Daicel Chiralpak<sup>®</sup>, AS-H 5 $\mu$ m, 250x4.6mm, column #: ASHOCE-LF002; OD = Phenomenex Lux<sup>®</sup>, 5 $\mu$ m Cellulose-1 LC Column, 250x4.6mm, part #: 00G-4459-E0. Isocratic solvent mixture (hexanes: isopropanol), flow rate, injection volume, and analysis-wavelength are denoted on individual HPLC traces. Note: unless otherwise specified, 1mL/min is the default HPLC method flow-rate.

### ==== HPLC Analysis Report ====

C:\LabSolutions\Training1107\LAN\LANII-162A\_98\_2\_B.lcd  
 Acquired by : Admin  
 Sample Name : LNII-162A  
 Sample ID : LNII-162A  
 Tray# : 1  
 Vial # : 45  
 Injection Volume : 5 uL  
 Data File Name : LANII-162A\_98\_2\_B.lcd  
 Method File Name : OD-98\_2\_Hexane\_IPA\_25min.lcm  
 Batch File Name : 6.23.17.lcb  
 Report File Name : UCD Default.lcr  
 Data Acquired : 6/23/2017 12:41:07 PM  
 Data Processed : 6/23/2017 1:06:09 PM

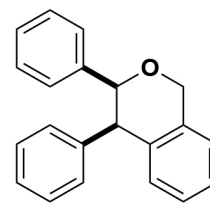

**11a**  
chiral

#### <Chromatogram>

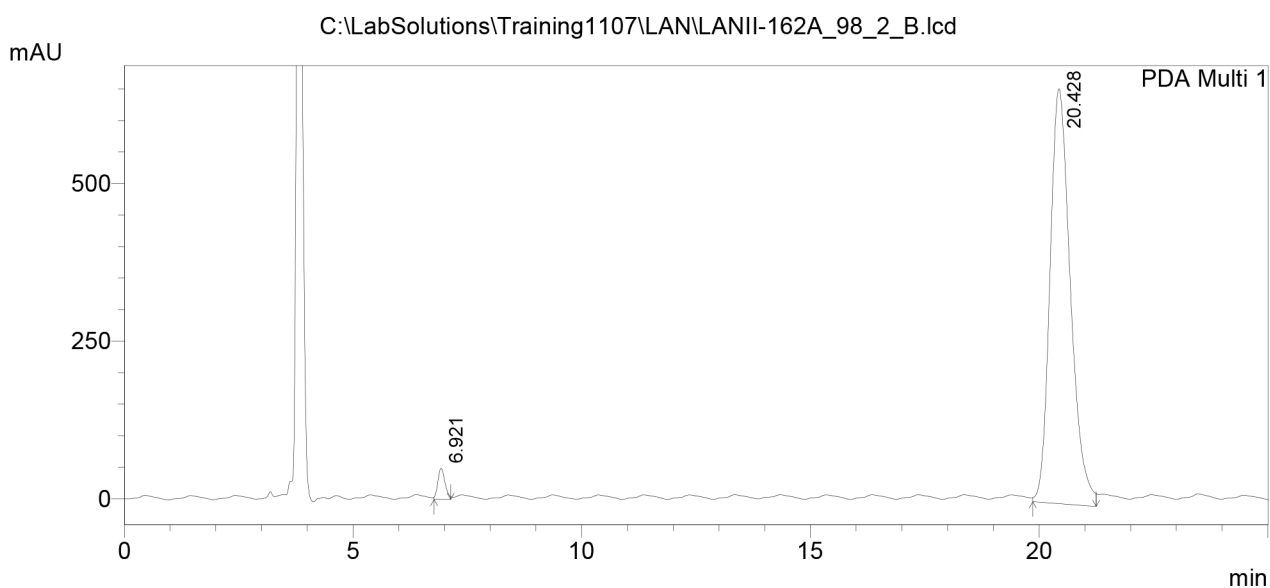

#### < Peak Table >

PeakTable C:\LabSolutions\Training1107\LAN\LANII-162A\_98\_2\_B.lcd

PDA Ch1 213nm 4nm

| Peak# | Ret. Time | Area     | Height | Area %  | Height % |
|-------|-----------|----------|--------|---------|----------|
| 1     | 6.921     | 540858   | 49287  | 2.570   | 6.963    |
| 2     | 20.428    | 20502736 | 658547 | 97.430  | 93.037   |
| Total |           | 21043594 | 707835 | 100.000 | 100.000  |

### ==== HPLC Analysis Report ====

C:\LabSolutions\Training1107\LAN\LANII-163A\_98\_2\_B.lcd  
 Acquired by : Admin  
 Sample Name : LNII-163A  
 Sample ID : LNII-163A  
 Tray# : 1  
 Vial # : 44  
 Injection Volume : 5 uL  
 Data File Name : LANII-163A\_98\_2\_B.lcd  
 Method File Name : OD-98\_2\_Hexane\_IPA\_25min.lcm  
 Batch File Name : 6.23.17.lcb  
 Report File Name : UCD Default.lcr  
 Data Acquired : 6/23/2017 1:06:37 PM  
 Data Processed : 6/23/2017 1:31:40 PM

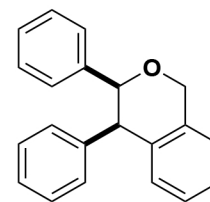

**11a**  
racemic

#### <Chromatogram>

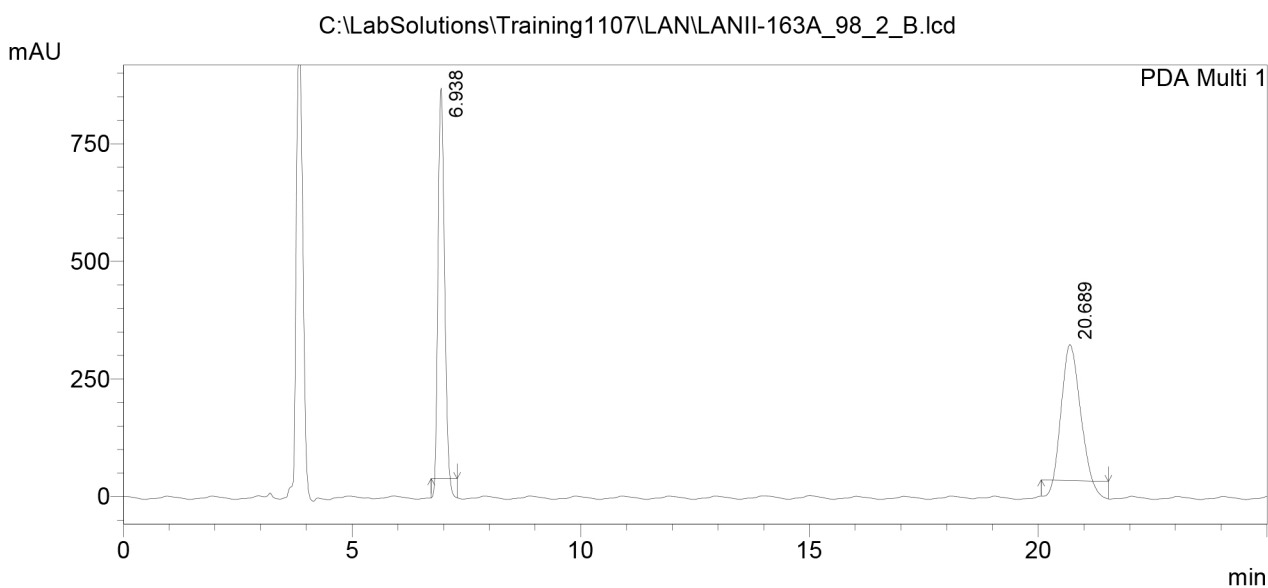

#### < Peak Table >

PeakTable C:\LabSolutions\Training1107\LAN\LANII-163A\_98\_2\_B.lcd

PDA Ch1 214nm 4nm

| Peak# | Ret. Time | Area     | Height  | Area %  | Height % |
|-------|-----------|----------|---------|---------|----------|
| 1     | 6.938     | 7393048  | 830123  | 52.208  | 74.184   |
| 2     | 20.689    | 6767795  | 288881  | 47.792  | 25.816   |
| Total |           | 14160843 | 1119004 | 100.000 | 100.000  |

## ==== HPLC Analysis Report ====

C:\LabSolutions\Training1107\Ben B\BDB\_I\_033\_2.lcd

Acquired by : Admin  
 Sample Name : 1  
 Sample ID : 1  
 Tray# : 1  
 Vial # : 92  
 Injection Volume : 20 uL  
 Data File Name : BDB\_I\_033\_2.lcd  
 Method File Name : OD-98\_2\_Hexane\_IPA\_35min.lcm  
 Batch File Name : 10JUN2018.lcb  
 Report File Name : UCD Default.lcr  
 Data Acquired : 6/10/2018 11:22:26 AM  
 Data Processed : 6/10/2018 11:57:29 AM

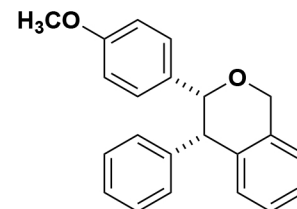

**11b**  
chiral

### <Chromatogram>

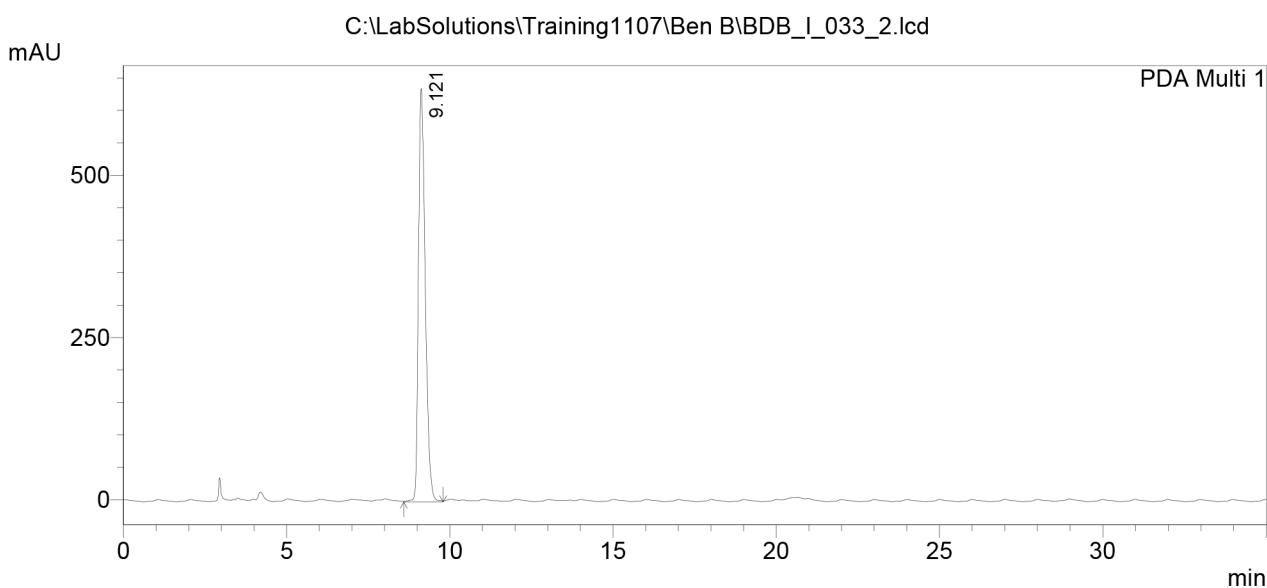

1 PDA Multi 1/224nm 4nm

### < Peak Table >

PeakTable C:\LabSolutions\Training1107\Ben B\BDB\_I\_033\_2.lcd

PDA Ch1 224nm 4nm

| Peak# | Ret. Time | Area    | Height | Area %  | Height % |
|-------|-----------|---------|--------|---------|----------|
| 1     | 9.121     | 9280631 | 636863 | 100.000 | 100.000  |
| Total |           | 9280631 | 636863 | 100.000 | 100.000  |



## ==== HPLC Analysis Report ====

C:\LabSolutions\Training1107\Ben B\BDB\_I\_011\_2.lcd  
 Acquired by : Admin  
 Sample Name : 1  
 Sample ID : 1  
 Tray# : 1  
 Vial # : 91  
 Injection Volume : 20 uL  
 Data File Name : BDB\_I\_011\_2.lcd  
 Method File Name : OD-98\_2\_Hexane\_IPA\_35min.lcm  
 Batch File Name : 10JUN2018.lcb  
 Report File Name : UCD Default.lcr  
 Data Acquired : 6/10/2018 10:46:59 AM  
 Data Processed : 6/10/2018 11:22:03 AM

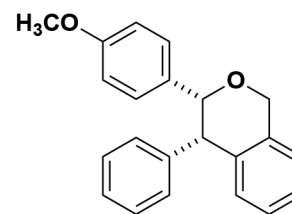

**11b**  
racemic

### <Chromatogram>

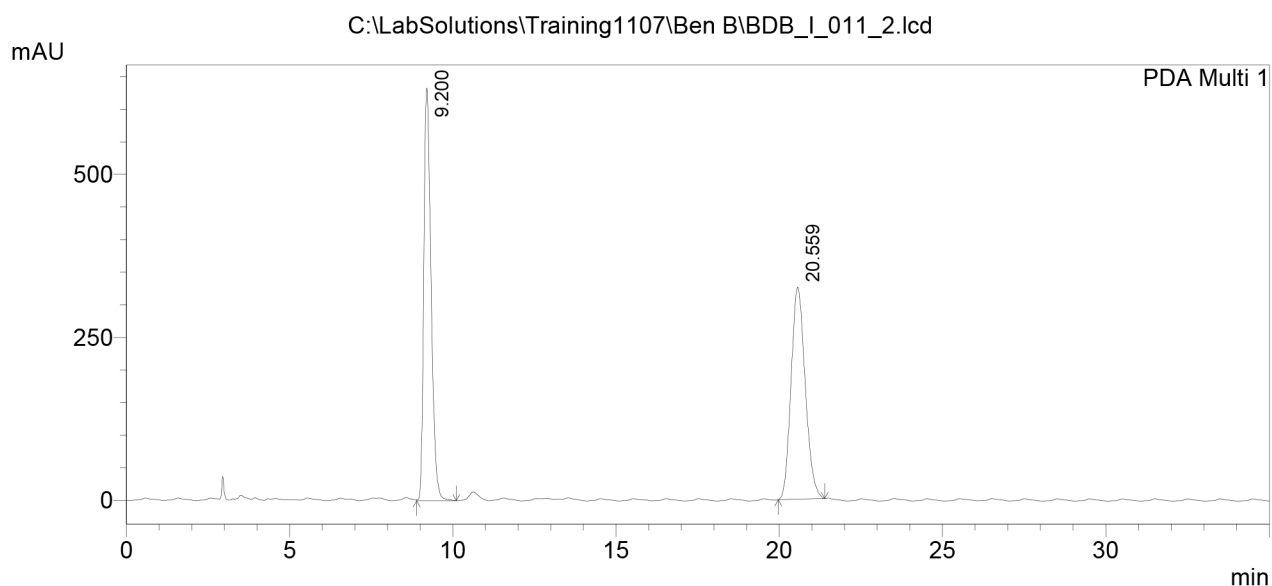

### < Peak Table >

PeakTable C:\LabSolutions\Training1107\Ben B\BDB\_I\_011\_2.lcd

PDA Ch1 224nm 4nm

| Peak# | Ret. Time | Area     | Height | Area %  | Height % |
|-------|-----------|----------|--------|---------|----------|
| 1     | 9.200     | 9807717  | 633380 | 50.002  | 66.057   |
| 2     | 20.559    | 9806928  | 325458 | 49.998  | 33.943   |
| Total |           | 19614645 | 958839 | 100.000 | 100.000  |

## ==== HPLC Analysis Report ====

C:\LabSolutions\Training1107\Jack Shiue\JS\_I\_010\_AS\_98\_2\_0.8mL\_20min.lcd  
 Acquired by : Admin  
 Sample Name : 1  
 Sample ID : 1  
 Tray# : 1  
 Vial # : 33  
 Injection Volume : 2 uL  
 Data File Name : JS\_I\_010\_AS\_98\_2\_0.8mL\_20min.lcd  
 Method File Name : AS-80\_20\_Hexane\_IPA\_20min\_0.8ml.lcm  
 Batch File Name : 20FEB2019\_1.lcb  
 Report File Name : UCD Default.lcr  
 Data Acquired : 2/21/2019 12:45:27 PM  
 Data Processed : 2/21/2019 1:55:28 PM

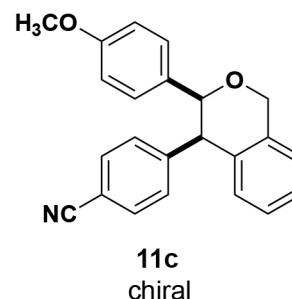

### <Chromatogram>

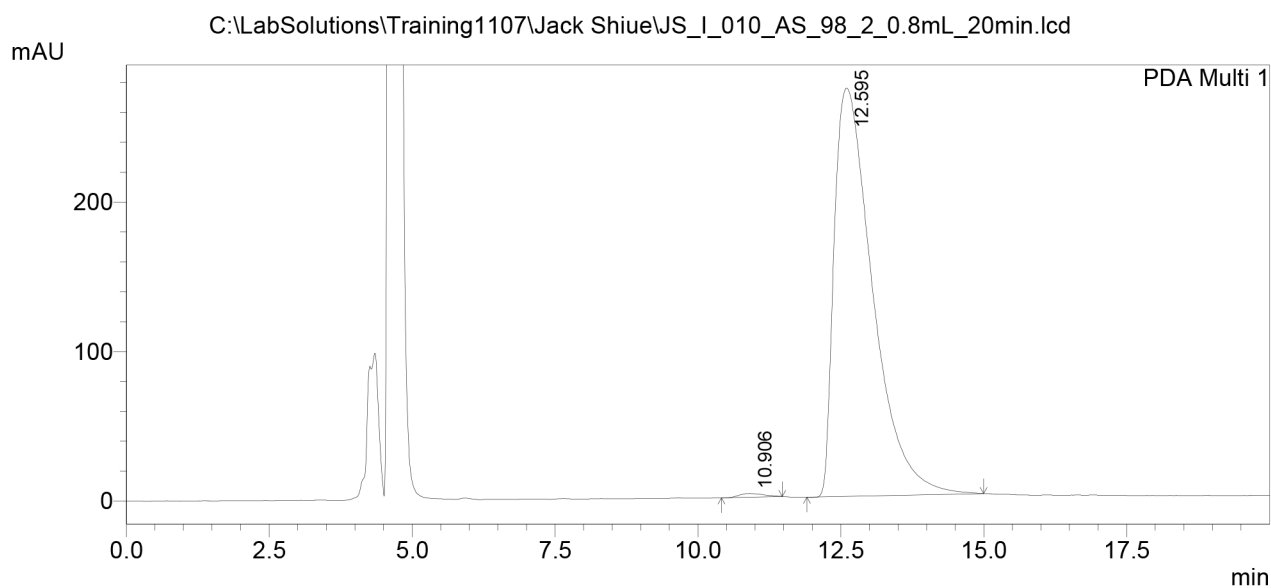

1 PDA Multi 1/205nm 4nm

### < Peak Table >

PeakTable C:\LabSolutions\Training1107\Jack Shiue\JS\_I\_010\_AS\_98\_2\_0.8mL\_20min.lcd

PDA Ch1 205nm 4nm

| Peak# | Ret. Time | Area     | Height | Area %  | Height % |
|-------|-----------|----------|--------|---------|----------|
| 1     | 10.906    | 73366    | 2518   | 0.571   | 0.913    |
| 2     | 12.595    | 12784238 | 273261 | 99.429  | 99.087   |
| Total |           | 12857604 | 275779 | 100.000 | 100.000  |

## ==== HPLC Analysis Report ====

Acquired by : Admin  
 Sample Name : 1  
 Sample ID : 1  
 Tray# : 1  
 Vial # : 4  
 Injection Volume : 2 uL  
 Data File Name : JS\_I\_011\_AS\_98\_2\_0.8mL\_20min.lcd  
 Method File Name : AS-80\_20\_Hexane\_IPA\_20min\_0.8ml.lcm  
 Batch File Name : 20FEB2019\_1.lcb  
 Report File Name : UCD Default.lcr  
 Data Acquired : 2/20/2019 10:37:36 AM  
 Data Processed : 2/20/2019 10:57:38 AM

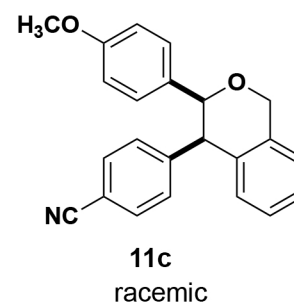

### <Chromatogram>

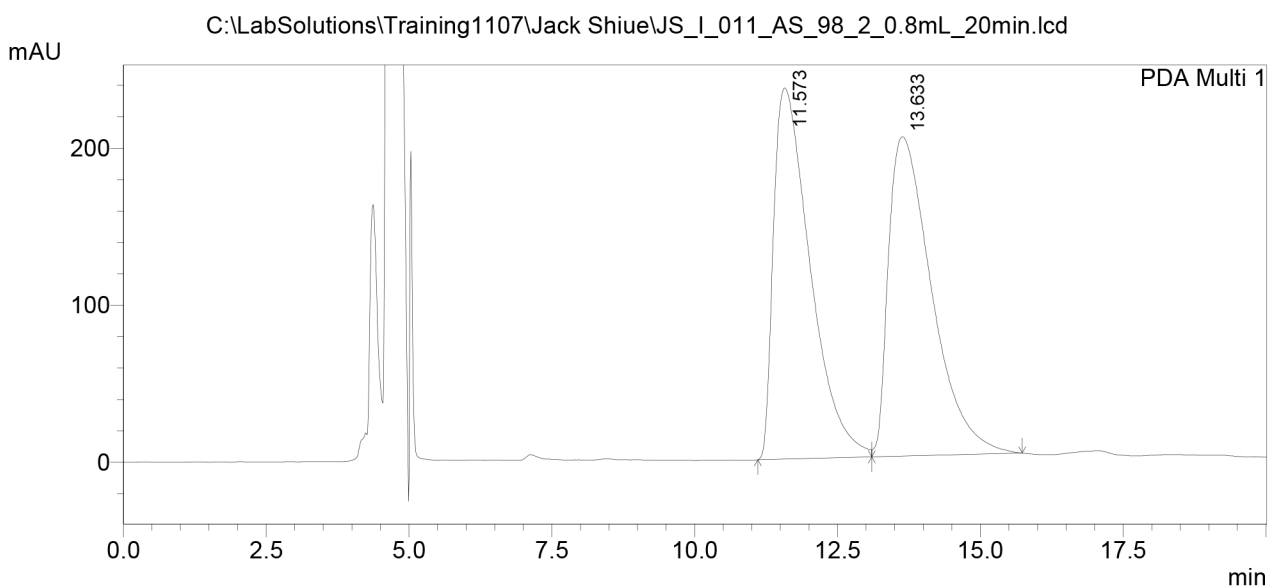

### < Peak Table >

PeakTable C:\LabSolutions\Training1107\Jack Shiue\JS\_I\_011\_AS\_98\_2\_0.8mL\_20min.lcd

PDA Ch1 204nm 4nm

| Peak# | Ret. Time | Area     | Height | Area %  | Height % |
|-------|-----------|----------|--------|---------|----------|
| 1     | 11.573    | 10549823 | 236414 | 49.610  | 53.745   |
| 2     | 13.633    | 10715667 | 203464 | 50.390  | 46.255   |
| Total |           | 21265490 | 439878 | 100.000 | 100.000  |

## ==== HPLC Analysis Report ====

Acquired by : Admin  
 Sample Name : 1  
 Sample ID : 1  
 Tray# : 1  
 Vial # : 22  
 Injection Volume : 2 uL  
 Data File Name : JS\_I\_022\_AD\_98\_2\_1mL\_25min.lcd  
 Method File Name : AD-80\_20\_Hexane\_IPA\_25min.lcm  
 Batch File Name : 19FEB2019\_1.lcb  
 Report File Name : UCD Default.lcr  
 Data Acquired : 4/7/2019 2:50:45 PM  
 Data Processed : 4/7/2019 3:26:13 PM

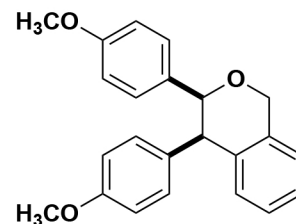

**11d**  
chiral

### <Chromatogram>

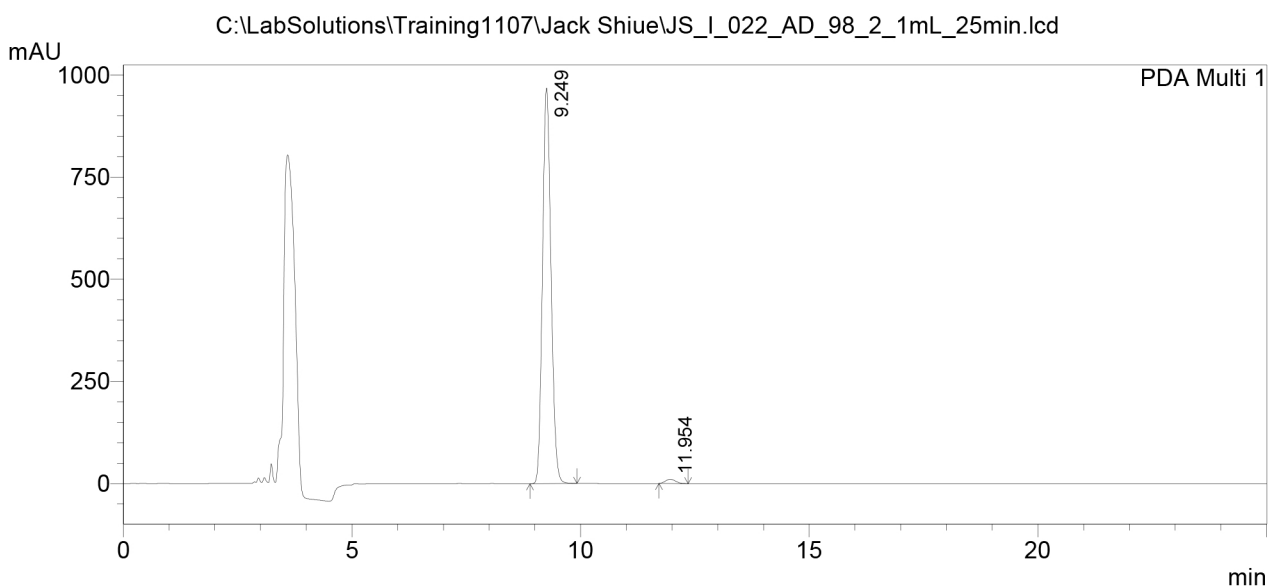

### < Peak Table >

PeakTable C:\LabSolutions\Training1107\Jack Shiue\JS\_I\_022\_AD\_98\_2\_1mL\_25min.lcd

PDA Ch1 205nm 4nm

| Peak# | Ret. Time | Area     | Height | Area %  | Height % |
|-------|-----------|----------|--------|---------|----------|
| 1     | 9.249     | 12566488 | 968228 | 98.706  | 98.917   |
| 2     | 11.954    | 164696   | 10605  | 1.294   | 1.083    |
| Total |           | 12731183 | 978832 | 100.000 | 100.000  |

## ==== HPLC Analysis Report ====

Acquired by : Admin  
 Sample Name : 1  
 Sample ID : 1  
 Tray# : 1  
 Vial # : 22  
 Injection Volume : 2 uL  
 Data File Name : JS\_I\_020\_AD\_98\_2\_1mL\_25min.lcd  
 Method File Name : AD-80\_20\_Hexane\_IPA\_25min.lcm  
 Batch File Name : 19FEB2019\_1.lcb  
 Report File Name : UCD Default.lcr  
 Data Acquired : 4/7/2019 1:03:58 PM  
 Data Processed : 4/7/2019 1:29:01 PM

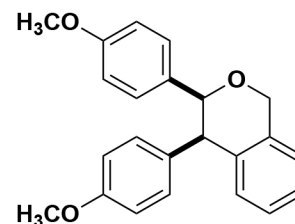

**11d**  
racemic

### <Chromatogram>

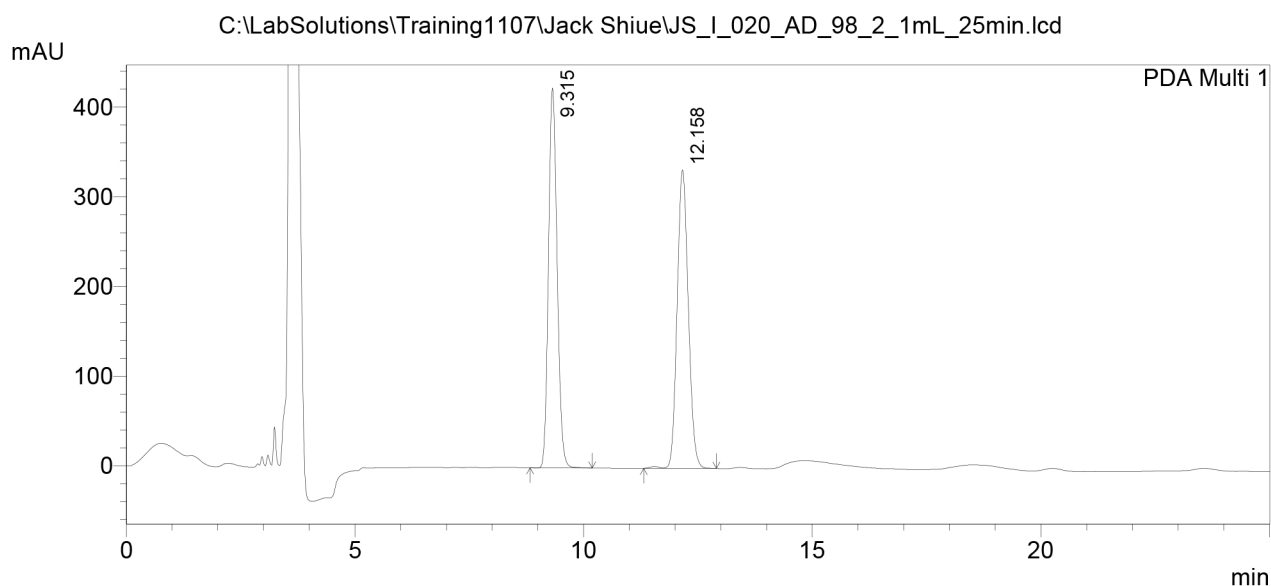

### < Peak Table >

PeakTable C:\LabSolutions\Training1107\Jack Shiue\JS\_I\_020\_AD\_98\_2\_1mL\_25min.lcd

PDA Ch1 204nm 4nm

| Peak# | Ret. Time | Area     | Height | Area %  | Height % |
|-------|-----------|----------|--------|---------|----------|
| 1     | 9.315     | 5576576  | 423824 | 49.652  | 55.999   |
| 2     | 12.158    | 5654798  | 333012 | 50.348  | 44.001   |
| Total |           | 11231374 | 756836 | 100.000 | 100.000  |

## ==== HPLC Analysis Report ====

Acquired by : Admin  
 Sample Name : 1  
 Sample ID : 1  
 Tray# : 1  
 Vial # : 66  
 Injection Volume : 3 uL  
 Data File Name : BDB\_II\_056\_AD\_90\_10\_1mL\_40min.lcd  
 Method File Name : AD-100%IPA-40min.lcm  
 Batch File Name : 04APR2019.lcb  
 Report File Name : UCD Default.lcr  
 Data Acquired : 4/3/2019 7:46:29 PM  
 Data Processed : 4/3/2019 8:26:33 PM

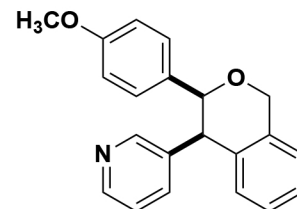

**11e**  
chiral

### <Chromatogram>

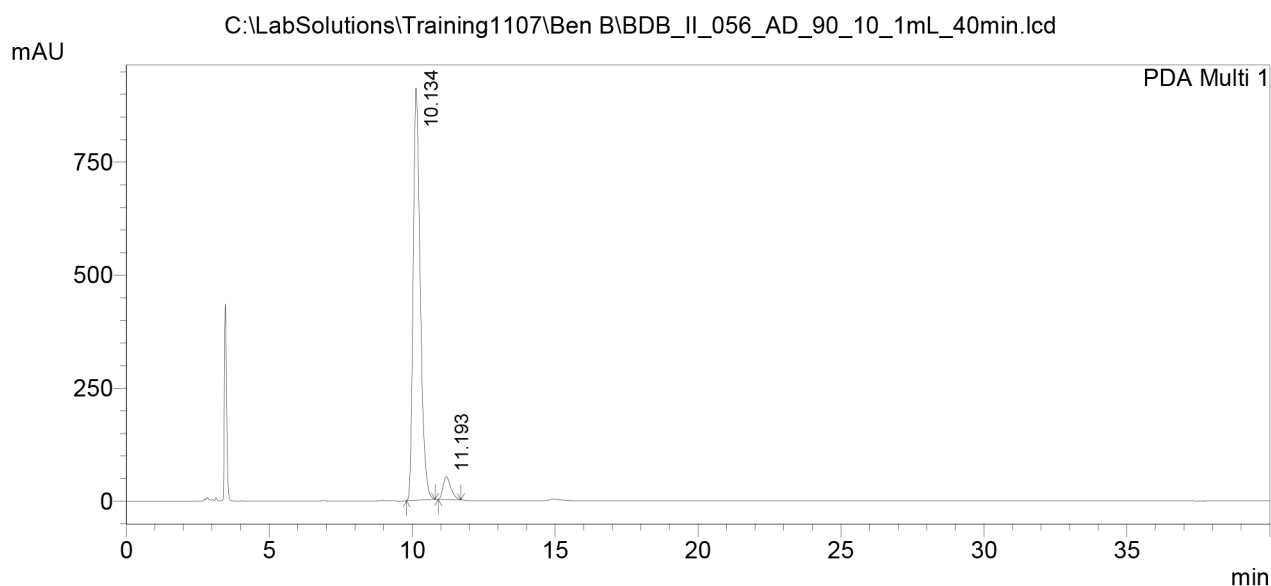

1 PDA Multi 1/206nm 4nm

### < Peak Table >

PeakTable C:\LabSolutions\Training1107\Ben B\BDB\_II\_056\_AD\_90\_10\_1mL\_40min.lcd

PDA Ch1 206nm 4nm

| Peak# | Ret. Time | Area     | Height | Area %  | Height % |
|-------|-----------|----------|--------|---------|----------|
| 1     | 10.134    | 15740198 | 912013 | 94.260  | 94.689   |
| 2     | 11.193    | 958460   | 51150  | 5.740   | 5.311    |
| Total |           | 16698658 | 963163 | 100.000 | 100.000  |

## ==== HPLC Analysis Report ====

Acquired by : Admin  
 Sample Name : 1  
 Sample ID : 1  
 Tray# : 1  
 Vial # : 67  
 Injection Volume : 3 uL  
 Data File Name : BDB\_II\_057\_AD\_90\_10\_1mL\_40min.lcd  
 Method File Name : AD-100%IPA-40min.lcm  
 Batch File Name : 04APR2019.lcb  
 Report File Name : UCD Default.lcr  
 Data Acquired : 4/3/2019 7:06:04 PM  
 Data Processed : 4/3/2019 7:46:07 PM

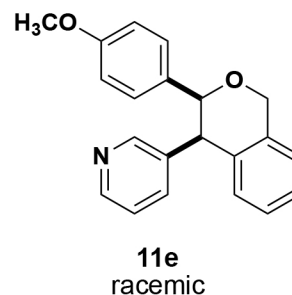

### <Chromatogram>

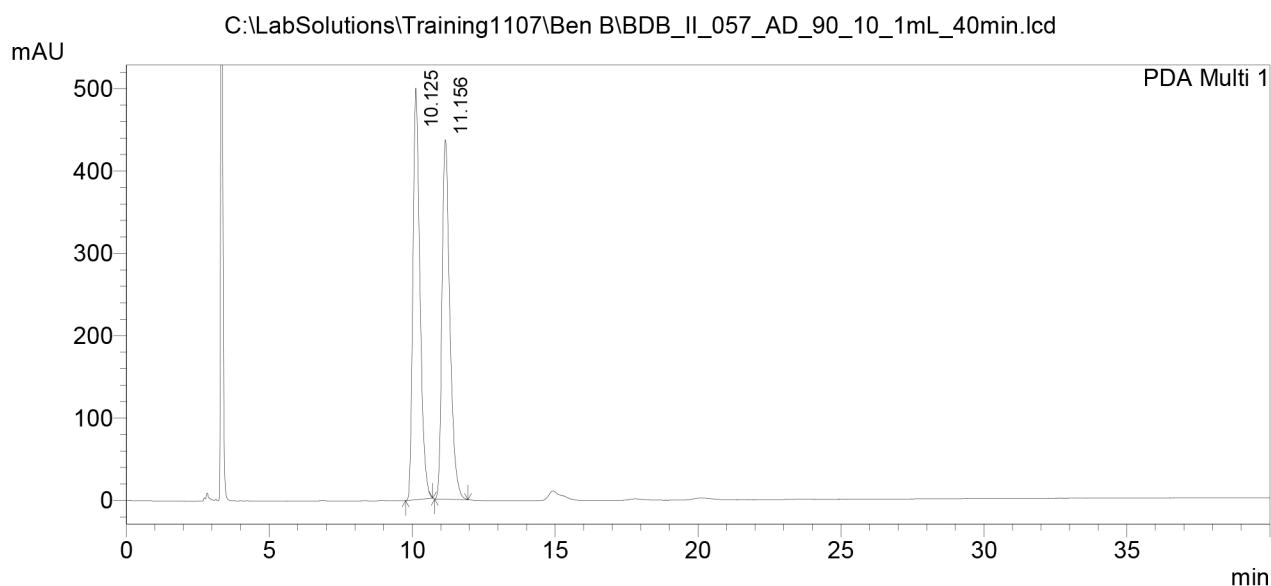

### < Peak Table >

PeakTable C:\LabSolutions\Training1107\Ben B\BDB\_II\_057\_AD\_90\_10\_1mL\_40min.lcd

PDA Ch1 206nm 4nm

| Peak# | Ret. Time | Area     | Height | Area %  | Height % |
|-------|-----------|----------|--------|---------|----------|
| 1     | 10.125    | 8594930  | 499964 | 50.607  | 53.391   |
| 2     | 11.156    | 8388726  | 436456 | 49.393  | 46.609   |
| Total |           | 16983656 | 936421 | 100.000 | 100.000  |

## ==== HPLC Analysis Report ====

Acquired by : Admin  
 Sample Name : LAN-IV-062A  
 Sample ID : LAN-IV-062A  
 Tray# : 1  
 Vial # : 76  
 Injection Volume : 10 uL  
 Data File Name : LAN-IV-058a\_98\_2\_AD1.lcd  
 Method File Name : AD-98\_2\_Hexane\_IPA\_50min-0.5ml.lcm  
 Batch File Name : 10.24.18\_2.lcb  
 Report File Name : UCD Default.lcr  
 Data Acquired : 10/24/2018 5:59:53 PM  
 Data Processed : 10/25/2018 11:15:08 AM

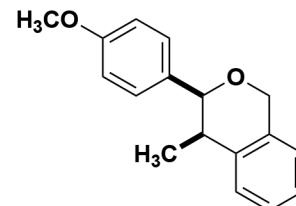

**11f**  
chiral

### <Chromatogram>

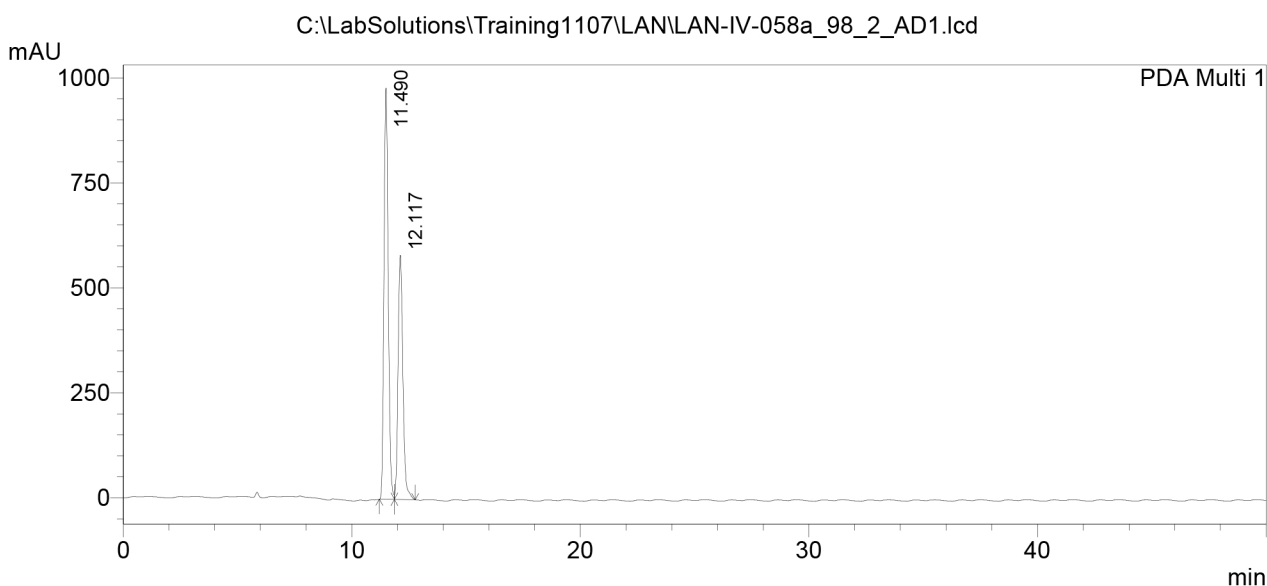

### < Peak Table >

PeakTable C:\LabSolutions\Training1107\LAN\LAN-IV-058a\_98\_2\_AD1.lcd

PDA Ch1 223nm 4nm

| Peak# | Ret. Time | Area     | Height  | Area %  | Height % |
|-------|-----------|----------|---------|---------|----------|
| 1     | 11.490    | 12679851 | 978653  | 59.677  | 62.717   |
| 2     | 12.117    | 8567717  | 581764  | 40.323  | 37.283   |
| Total |           | 21247568 | 1560417 | 100.000 | 100.000  |



**==== HPLC Analysis Report ====**

C:\LabSolutions\Training1107\LAN\LAN-IV-062A\_98\_2\_AD1.lcd  
 Acquired by : Admin  
 Sample Name : LAN-IV-062A  
 Sample ID : LAN-IV-062A  
 Tray# : 1  
 Vial # : 92  
 Injection Volume : 10 uL  
 Data File Name : LAN-IV-062A\_98\_2\_AD1.lcd  
 Method File Name : AD-98\_2\_Hexane\_IPA\_60min.lcm  
 Batch File Name : 10.24.18.lcb  
 Report File Name : UCD Default.lcr  
 Data Acquired : 10/24/2018 3:22:10 PM  
 Data Processed : 10/24/2018 3:56:02 PM

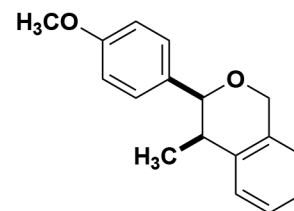

**11f**  
racemic

**<Chromatogram>**
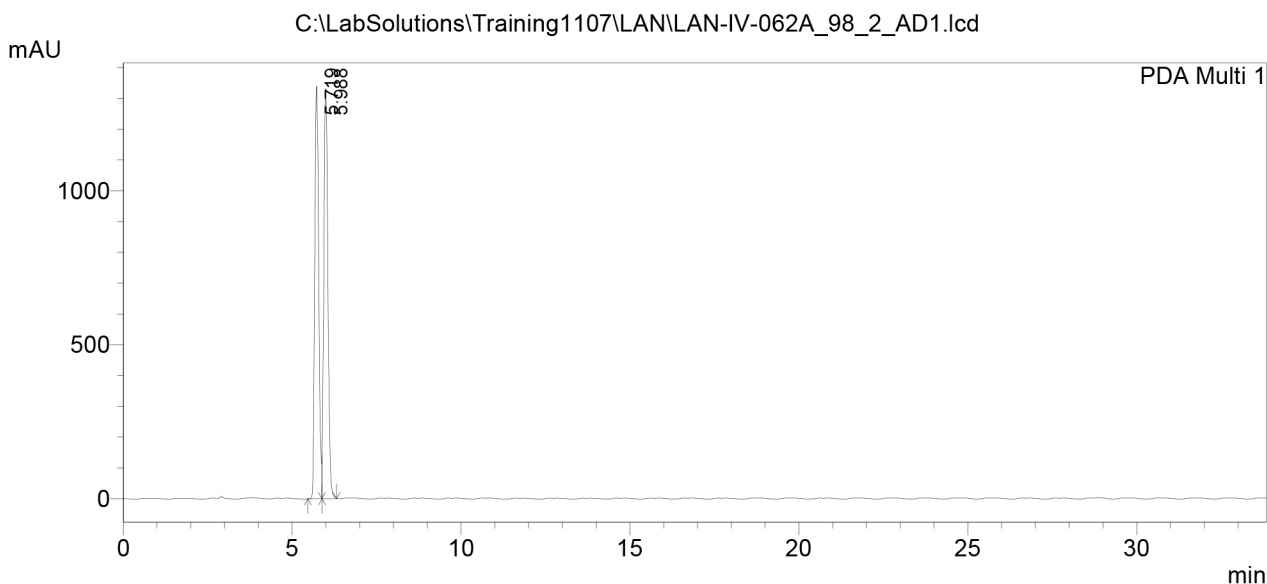
**< Peak Table >**

PeakTable C:\LabSolutions\Training1107\LAN\LAN-IV-062A\_98\_2\_AD1.lcd

PDA Ch1 223nm 4nm

| Peak# | Ret. Time | Area     | Height  | Area %  | Height % |
|-------|-----------|----------|---------|---------|----------|
| 1     | 5.719     | 11006329 | 1340656 | 49.815  | 50.139   |
| 2     | 5.988     | 11088090 | 1333208 | 50.185  | 49.861   |
| Total |           | 22094419 | 2673864 | 100.000 | 100.000  |

## ==== HPLC Analysis Report ====

Acquired by : Admin  
 Sample Name : 1  
 Sample ID : 1  
 Tray# : 1  
 Vial # : 92  
 Injection Volume : 2 uL  
 Data File Name : BDB\_II\_004\_OD\_98\_2\_1mL\_20min.lcd  
 Method File Name : OD-100\_0\_Hexane\_IPA\_20min.lcm  
 Batch File Name : 21DEC2018\_3.lcb  
 Report File Name : UCD Default.lcr  
 Data Acquired : 12/21/2018 4:07:21 PM  
 Data Processed : 12/21/2018 4:27:22 PM

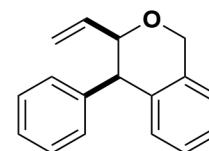

**13a**  
chiral

### <Chromatogram>

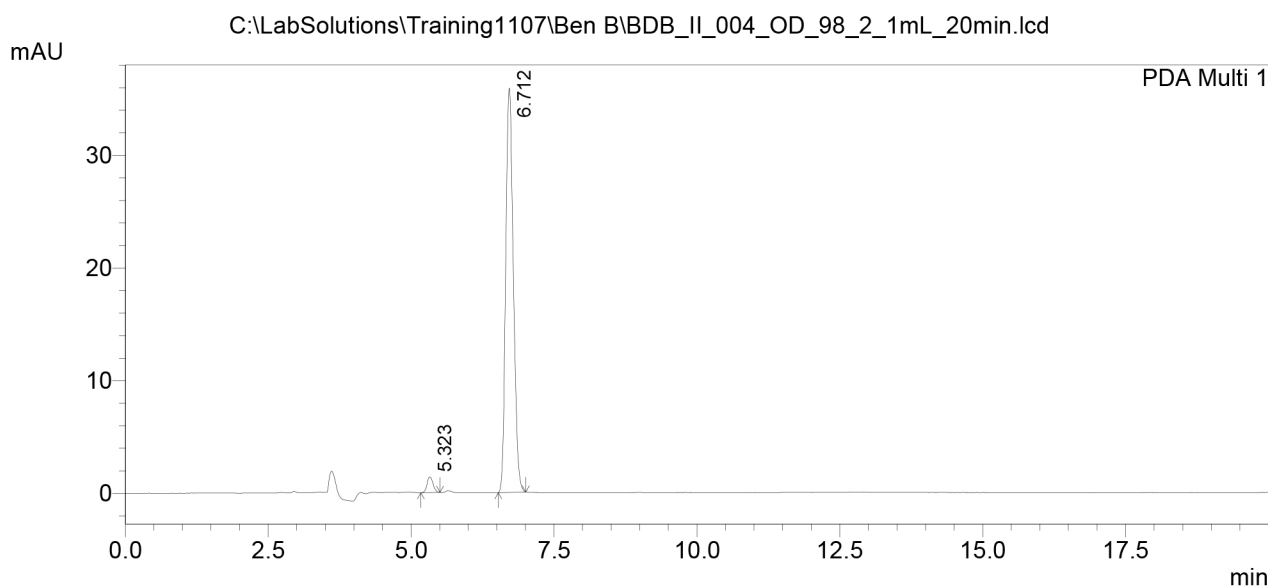

1 PDA Multi 1/254nm 4nm

### < Peak Table >

PeakTable C:\LabSolutions\Training1107\Ben B\BDB\_II\_004\_OD\_98\_2\_1mL\_20min.lcd

PDA Ch1 254nm 4nm

| Peak# | Ret. Time | Area   | Height | Area %  | Height % |
|-------|-----------|--------|--------|---------|----------|
| 1     | 5.323     | 10193  | 1390   | 2.975   | 3.730    |
| 2     | 6.712     | 332390 | 35888  | 97.025  | 96.270   |
| Total |           | 342583 | 37278  | 100.000 | 100.000  |

**==== HPLC Analysis Report ====**

C:\LabSolutions\Training1107\Ben B\BDB\_II\_005\_OD\_98\_2\_1mL\_20min.lcd  
 Acquired by : Admin  
 Sample Name : 1  
 Sample ID : 1  
 Tray# : 1  
 Vial # : 91  
 Injection Volume : 2 uL  
 Data File Name : BDB\_II\_005\_OD\_98\_2\_1mL\_20min.lcd  
 Method File Name : OD-100\_0\_Hexane\_IPA\_20min.lcm  
 Batch File Name : 21DEC2018\_3.lcb  
 Report File Name : UCD Default.lcr  
 Data Acquired : 12/21/2018 3:46:53 PM  
 Data Processed : 12/21/2018 4:06:56 PM

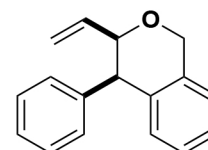

**13a**  
racemic

**<Chromatogram>**
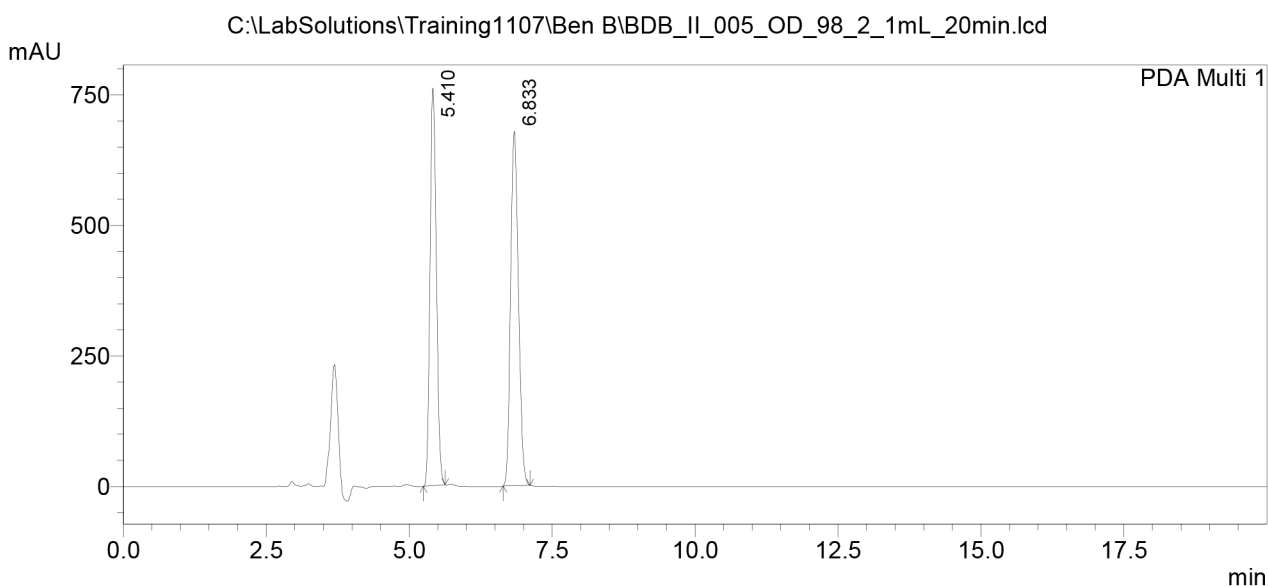
**< Peak Table >**

PeakTable C:\LabSolutions\Training1107\Ben B\BDB\_II\_005\_OD\_98\_2\_1mL\_20min.lcd

PDA Ch1 206nm 4nm

| Peak# | Ret. Time | Area     | Height  | Area %  | Height % |
|-------|-----------|----------|---------|---------|----------|
| 1     | 5.410     | 5880365  | 761664  | 47.575  | 52.851   |
| 2     | 6.833     | 6479833  | 679479  | 52.425  | 47.149   |
| Total |           | 12360198 | 1441144 | 100.000 | 100.000  |

## ==== HPLC Analysis Report ====

Acquired by : Admin  
 Sample Name : 1  
 Sample ID : 1  
 Tray# : 1  
 Vial # : 98  
 Injection Volume : 4 uL  
 Data File Name : BDB\_II\_018\_AD\_98\_2\_0.5mL\_20min.lcd  
 Method File Name : AD-100%\_Hexanes\_20min\_0.5mL.lcm  
 Batch File Name : 16JAN2019.lcb  
 Report File Name : UCD Default.lcr  
 Data Acquired : 1/16/2019 6:41:50 PM  
 Data Processed : 1/16/2019 7:01:52 PM

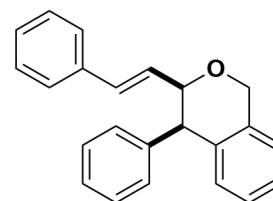

**13b**  
chiral

### <Chromatogram>

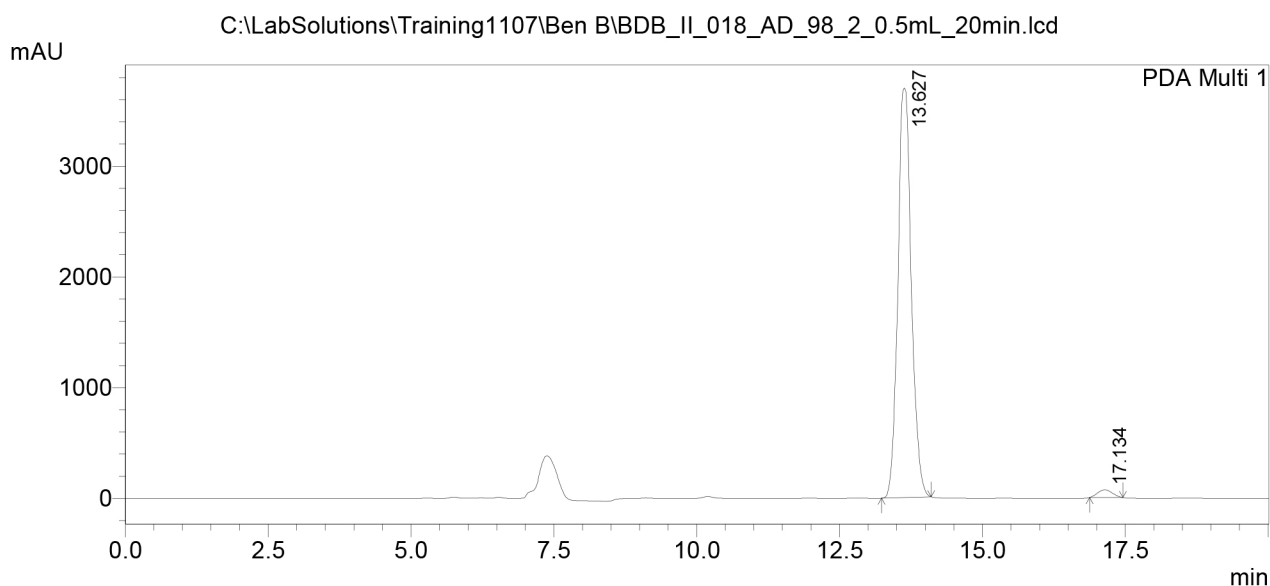

1 PDA Multi 1/205nm 4nm

### < Peak Table >

PeakTable C:\LabSolutions\Training1107\Ben B\BDB\_II\_018\_AD\_98\_2\_0.5mL\_20min.lcd

PDA Ch1 205nm 4nm

| Peak# | Ret. Time | Area     | Height  | Area %  | Height % |
|-------|-----------|----------|---------|---------|----------|
| 1     | 13.627    | 60649099 | 3698079 | 97.986  | 98.137   |
| 2     | 17.134    | 1246615  | 70216   | 2.014   | 1.863    |
| Total |           | 61895714 | 3768295 | 100.000 | 100.000  |

## ==== HPLC Analysis Report ====

Acquired by : Admin  
 Sample Name : 1  
 Sample ID : 1  
 Tray# : 1  
 Vial # : 99  
 Injection Volume : 4 uL  
 Data File Name : BDB\_II\_019\_AD\_98\_2\_0.5mL\_20min.lcd  
 Method File Name : AD-100%\_Hexanes\_20min\_0.5mL.lcm  
 Batch File Name : 16JAN2019.lcb  
 Report File Name : UCD Default.lcr  
 Data Acquired : 1/16/2019 6:21:26 PM  
 Data Processed : 1/16/2019 6:41:29 PM

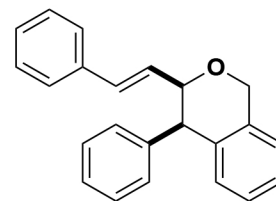

**13b**  
racemic

### <Chromatogram>

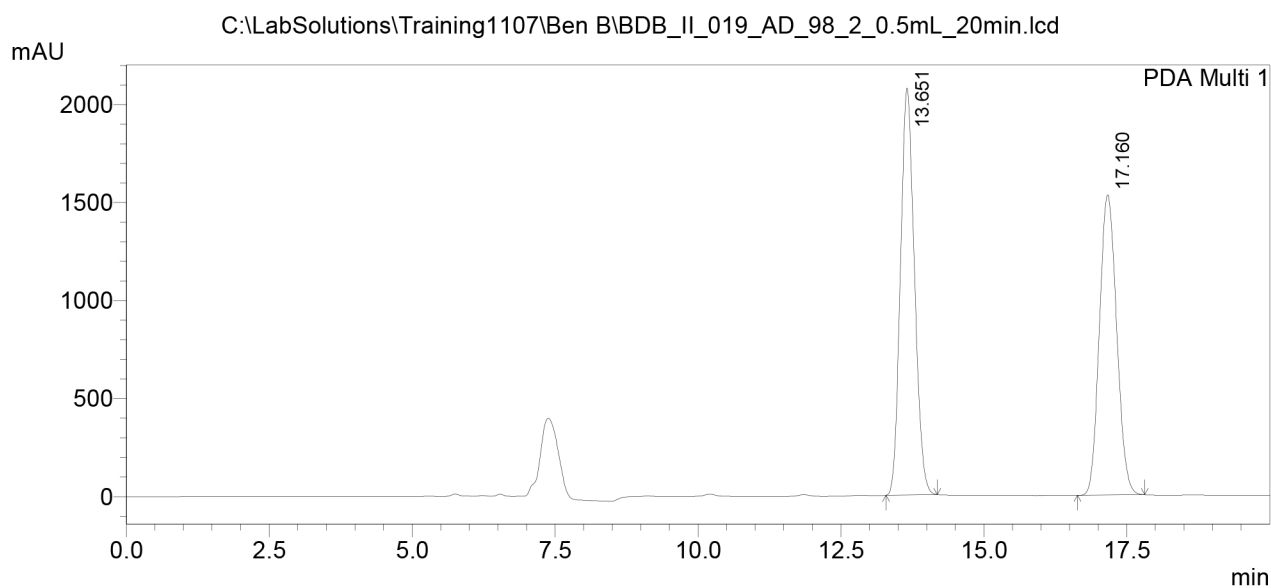

1 PDA Multi 1/205nm 4nm

### < Peak Table >

PeakTable C:\LabSolutions\Training1107\Ben B\BDB\_II\_019\_AD\_98\_2\_0.5mL\_20min.lcd

PDA Ch1 205nm 4nm

| Peak# | Ret. Time | Area     | Height  | Area %  | Height % |
|-------|-----------|----------|---------|---------|----------|
| 1     | 13.651    | 35348389 | 2075808 | 52.335  | 57.542   |
| 2     | 17.160    | 32194431 | 1531650 | 47.665  | 42.458   |
| Total |           | 67542820 | 3607458 | 100.000 | 100.000  |

## ==== HPLC Analysis Report ====

Acquired by : Admin  
 Sample Name : 1  
 Sample ID : 1  
 Tray# : 1  
 Vial # : 96  
 Injection Volume : 2 uL  
 Data File Name : BDB\_II\_016\_OD\_98\_2\_1mL\_20min.lcd  
 Method File Name : OD-100\_0\_Hexane\_IPA\_20min.lcm  
 Batch File Name : 17JAN2019\_2.lcb  
 Report File Name : UCD Default.lcr  
 Data Acquired : 1/17/2019 11:48:34 AM  
 Data Processed : 1/17/2019 12:08:37 PM

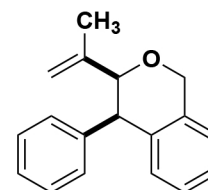

**13c**  
chiral

### <Chromatogram>

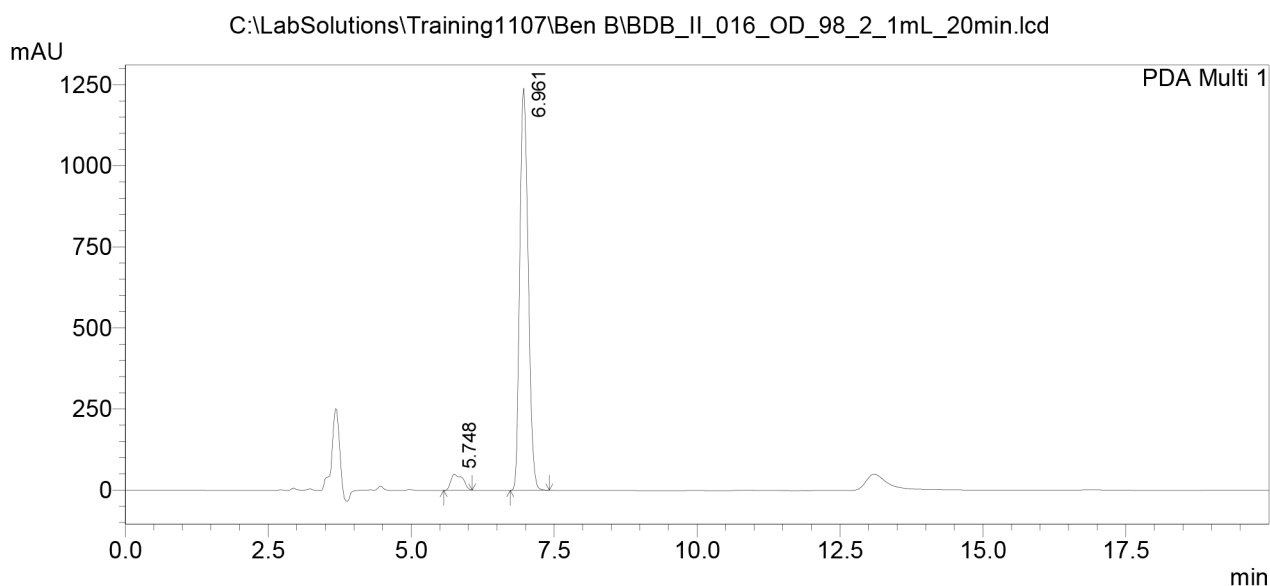

### < Peak Table >

PeakTable C:\LabSolutions\Training1107\Ben B\BDB\_II\_016\_OD\_98\_2\_1mL\_20min.lcd

PDA Ch1 205nm 4nm

| Peak# | Ret. Time | Area     | Height  | Area %  | Height % |
|-------|-----------|----------|---------|---------|----------|
| 1     | 5.748     | 727354   | 49891   | 5.400   | 3.865    |
| 2     | 6.961     | 12743099 | 1241006 | 94.600  | 96.135   |
| Total |           | 13470453 | 1290897 | 100.000 | 100.000  |

## ==== HPLC Analysis Report ====

Acquired by : Admin  
 Sample Name : 1  
 Sample ID : 1  
 Tray# : 1  
 Vial # : 97  
 Injection Volume : 2 uL  
 Data File Name : BDB\_II\_017\_OD\_98\_2\_1mL\_20min.lcd  
 Method File Name : OD-100\_0\_Hexane\_IPA\_20min.lcm  
 Batch File Name : 17JAN2019.lcb  
 Report File Name : UCD Default.lcr  
 Data Acquired : 1/17/2019 10:57:29 AM  
 Data Processed : 1/17/2019 11:17:30 AM

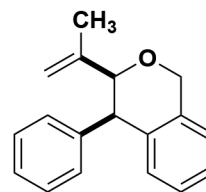

**13c**  
racemic

### <Chromatogram>

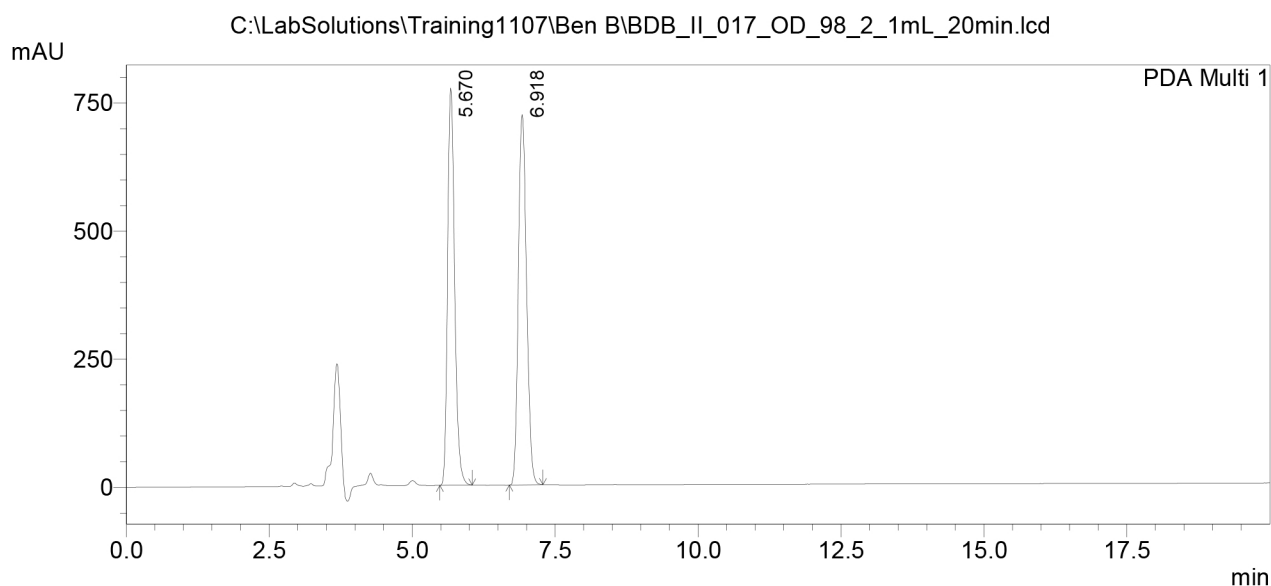

### < Peak Table >

PeakTable C:\LabSolutions\Training1107\Ben B\BDB\_II\_017\_OD\_98\_2\_1mL\_20min.lcd

PDA Ch1 205nm 4nm

| Peak# | Ret. Time | Area     | Height  | Area %  | Height % |
|-------|-----------|----------|---------|---------|----------|
| 1     | 5.670     | 6625039  | 775188  | 47.905  | 51.750   |
| 2     | 6.918     | 7204425  | 722749  | 52.095  | 48.250   |
| Total |           | 13829465 | 1497937 | 100.000 | 100.000  |

## ==== HPLC Analysis Report ====

Acquired by : Admin  
 Sample Name : 1  
 Sample ID : 1  
 Tray# : 1  
 Vial # : 93  
 Injection Volume : 2 uL  
 Data File Name : BDB\_II\_030\_OD\_98\_2\_1mL\_20min.lcd  
 Method File Name : OD-100\_0\_Hexane\_IPA\_20min.lcm  
 Batch File Name : 24JAN2019\_2.lcb  
 Report File Name : UCD Default.lcr  
 Data Acquired : 1/24/2019 1:21:35 PM  
 Data Processed : 1/24/2019 1:41:38 PM

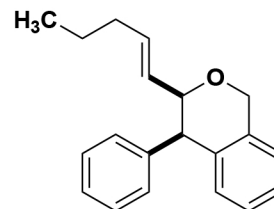

**13d**  
chiral

### <Chromatogram>

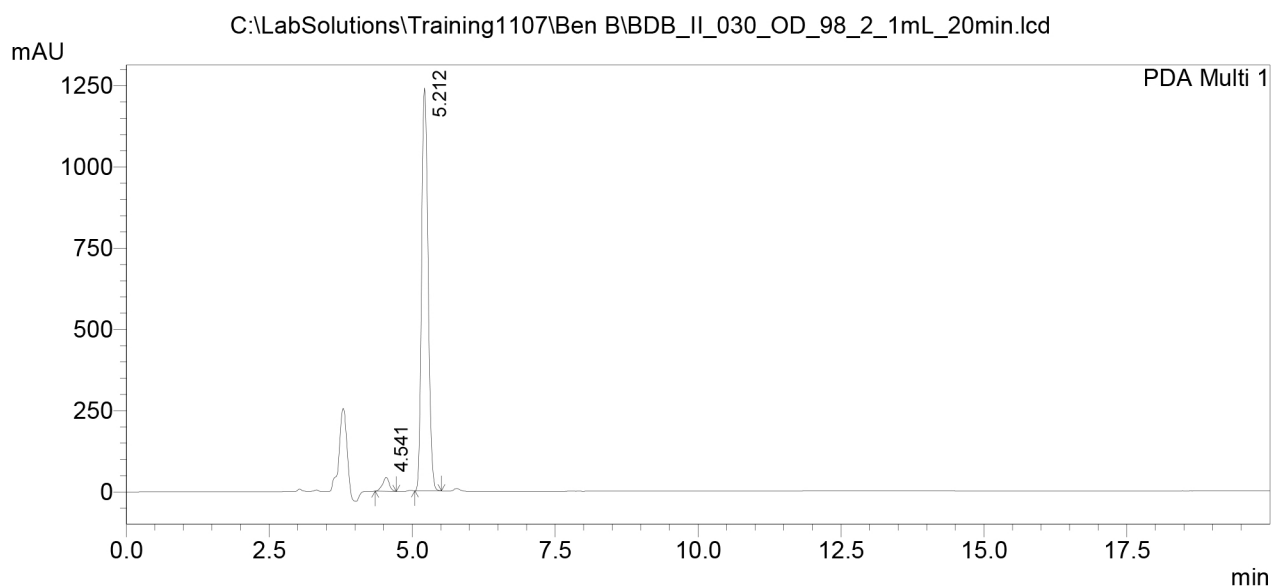

1 PDA Multi 1/205nm 4nm

### < Peak Table >

PeakTable C:\LabSolutions\Training1107\Ben B\BDB\_II\_030\_OD\_98\_2\_1mL\_20min.lcd

PDA Ch1 205nm 4nm

| Peak# | Ret. Time | Area     | Height  | Area %  | Height % |
|-------|-----------|----------|---------|---------|----------|
| 1     | 4.541     | 348015   | 42837   | 3.427   | 3.339    |
| 2     | 5.212     | 9806386  | 1240053 | 96.573  | 96.661   |
| Total |           | 10154401 | 1282890 | 100.000 | 100.000  |



### ==== HPLC Analysis Report ====

Acquired by : Admin  
 Sample Name : 1  
 Sample ID : 1  
 Tray# : 1  
 Vial # : 94  
 Injection Volume : 2 uL  
 Data File Name : BDB\_II\_029\_OD\_98\_2\_1mL\_20min.lcd  
 Method File Name : OD-100\_0\_Hexane\_IPA\_20min.lcm  
 Batch File Name : 24JAN2019.lcb  
 Report File Name : UCD Default.lcr  
 Data Acquired : 1/24/2019 12:38:55 PM  
 Data Processed : 1/24/2019 12:58:56 PM

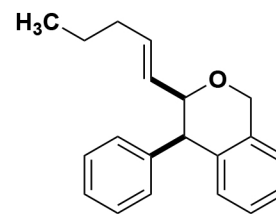

**13d**  
racemic

#### <Chromatogram>

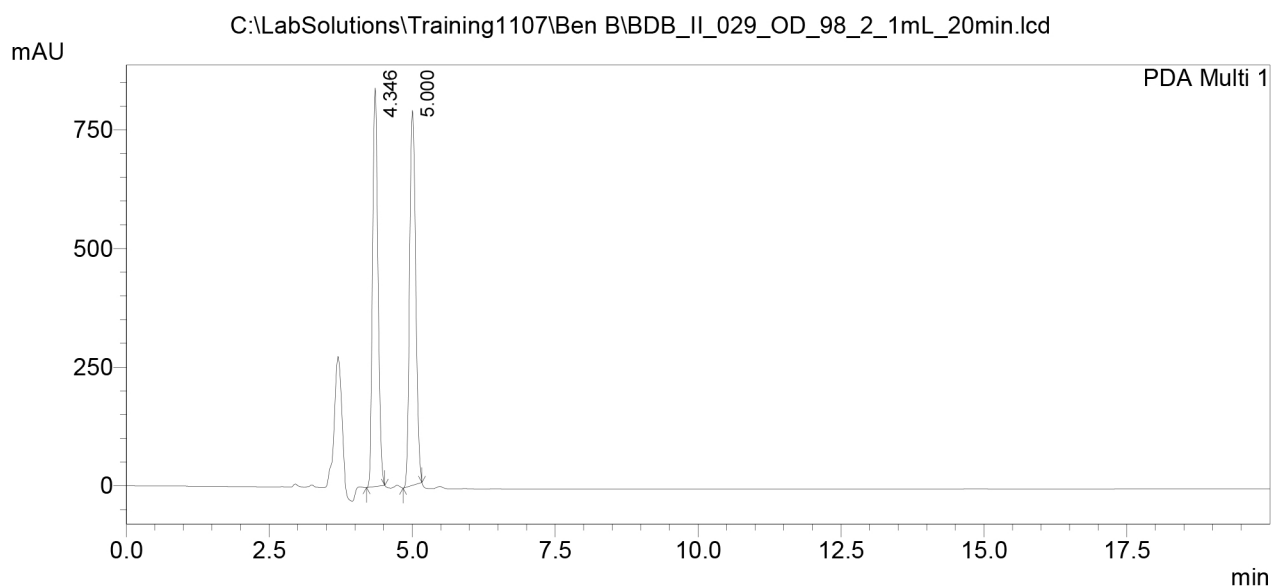

#### < Peak Table >

PeakTable C:\LabSolutions\Training1107\Ben B\BDB\_II\_029\_OD\_98\_2\_1mL\_20min.lcd

PDA Ch1 205nm 4nm

| Peak# | Ret. Time | Area     | Height  | Area %  | Height % |
|-------|-----------|----------|---------|---------|----------|
| 1     | 4.346     | 5560310  | 839786  | 48.727  | 51.518   |
| 2     | 5.000     | 5850778  | 790282  | 51.273  | 48.482   |
| Total |           | 11411088 | 1630068 | 100.000 | 100.000  |

## ==== HPLC Analysis Report ====

Acquired by : Admin  
 Sample Name : 1  
 Sample ID : 1  
 Tray# : 1  
 Vial # : 62  
 Injection Volume : 3 uL  
 Data File Name : BDB\_II\_066\_OD\_98\_2\_0.5mL\_20min.lcd  
 Method File Name : OD-80\_20\_Hexane\_IPA\_20min\_0.5mL.lcm  
 Batch File Name : 04-10-19.lcb  
 Report File Name : UCD Default.lcr  
 Data Acquired : 4/10/2019 12:03:03 PM  
 Data Processed : 4/10/2019 12:23:05 PM

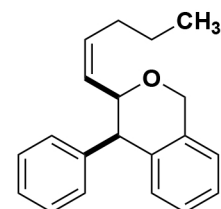

**13e**  
chiral

### <Chromatogram>

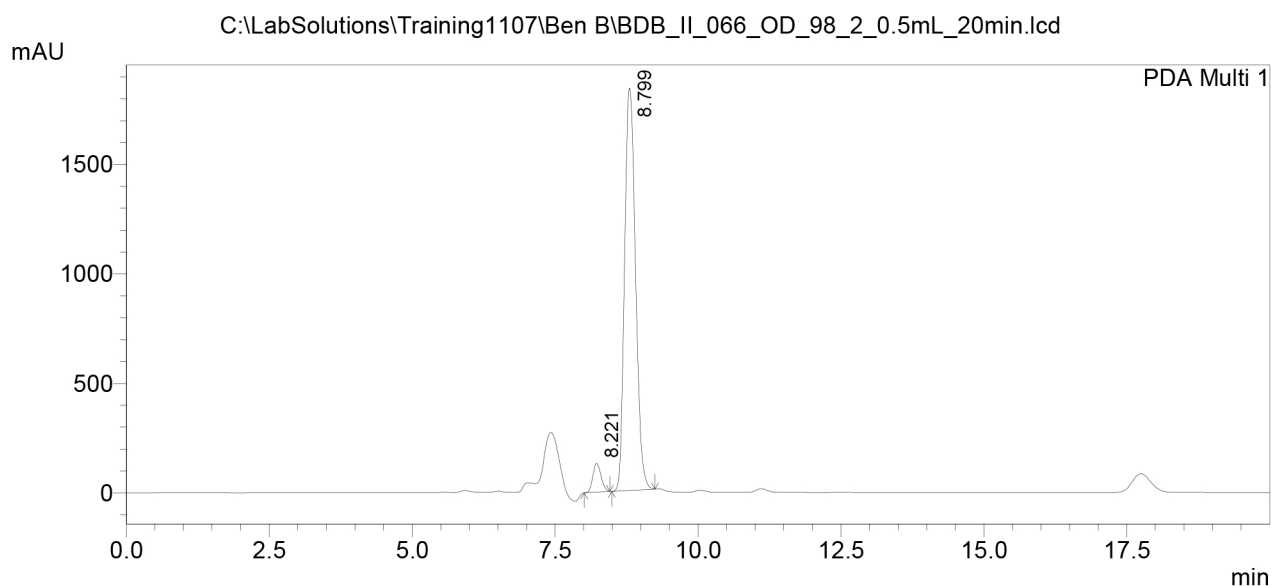

1 PDA Multi 1/204nm 4nm

### < Peak Table >

PeakTable C:\LabSolutions\Training1107\Ben B\BDB\_II\_066\_OD\_98\_2\_0.5mL\_20min.lcd

PDA Ch1 204nm 4nm

| Peak# | Ret. Time | Area     | Height  | Area %  | Height % |
|-------|-----------|----------|---------|---------|----------|
| 1     | 8.221     | 1305504  | 130913  | 5.065   | 6.647    |
| 2     | 8.799     | 24467588 | 1838643 | 94.935  | 93.353   |
| Total |           | 25773092 | 1969555 | 100.000 | 100.000  |

## ==== HPLC Analysis Report ====

Acquired by : Admin  
 Sample Name : 1  
 Sample ID : 1  
 Tray# : 1  
 Vial # : 62  
 Injection Volume : 3 uL  
 Data File Name : BDB\_II\_065\_OD\_98\_2\_0.5mL\_20min.lcd  
 Method File Name : OD-80\_20\_Hexane\_IPA\_20min\_0.5mL.lcm  
 Batch File Name : 08APR2019.lcb  
 Report File Name : UCD Default.lcr  
 Data Acquired : 4/8/2019 5:25:09 PM  
 Data Processed : 4/8/2019 5:45:10 PM

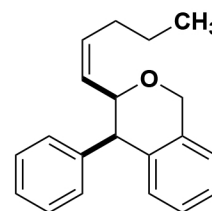

**13e**  
racemic

### <Chromatogram>

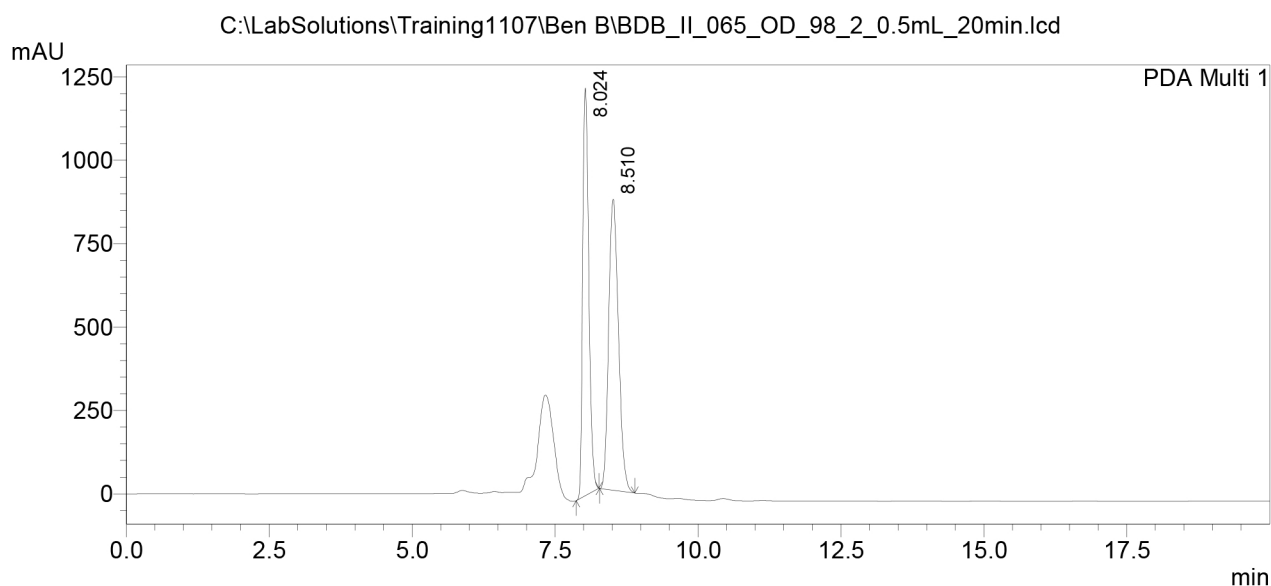

1 PDA Multi 1/206nm 4nm

### < Peak Table >

PeakTable C:\LabSolutions\Training1107\Ben B\BDB\_II\_065\_OD\_98\_2\_0.5mL\_20min.lcd

PDA Ch1 206nm 4nm

| Peak# | Ret. Time | Area     | Height  | Area %  | Height % |
|-------|-----------|----------|---------|---------|----------|
| 1     | 8.024     | 9034375  | 1223049 | 46.507  | 58.365   |
| 2     | 8.510     | 10391516 | 872484  | 53.493  | 41.635   |
| Total |           | 19425891 | 2095533 | 100.000 | 100.000  |

## ==== HPLC Analysis Report ====

Acquired by : Admin  
 Sample Name : 1  
 Sample ID : 1  
 Tray# : 1  
 Vial # : 94  
 Injection Volume : 3 uL  
 Data File Name : BDB\_II\_006\_AD\_98\_2\_0.5mL.lcd  
 Method File Name : AD-100%\_Hexanes\_20min\_0.5mL.lcm  
 Batch File Name : 21DEC2018.lcb  
 Report File Name : UCD Default.lcr  
 Data Acquired : 12/21/2018 10:51:07 AM  
 Data Processed : 12/21/2018 11:11:09 AM

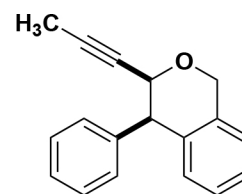

**13f**  
chiral

### <Chromatogram>

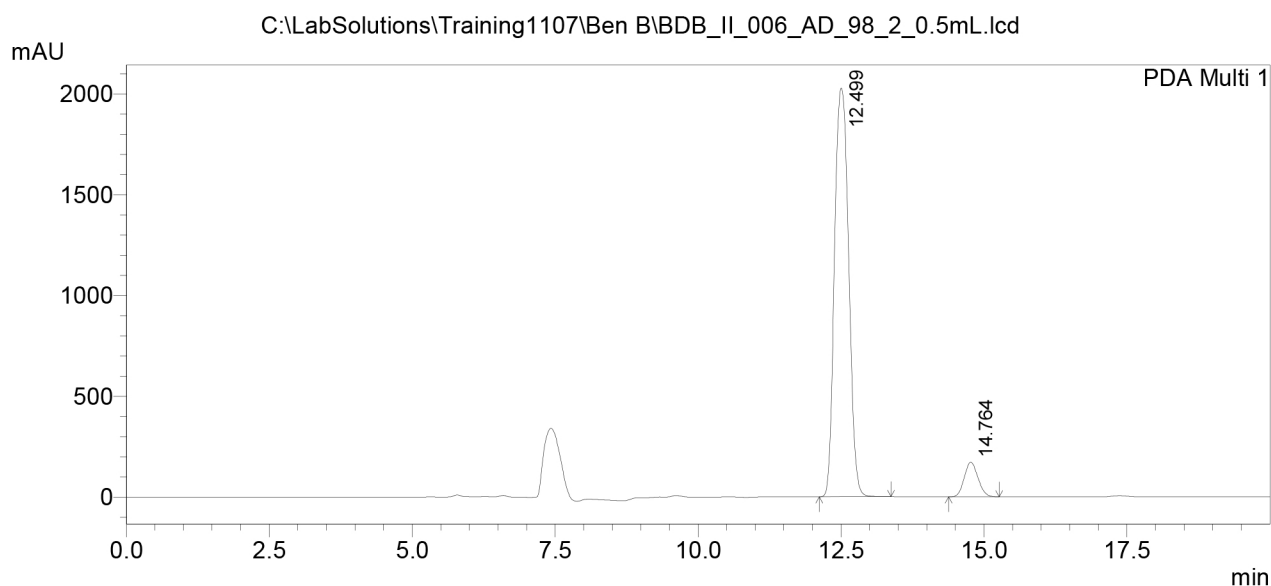

1 PDA Multi 1/206nm 4nm

### < Peak Table >

PeakTable C:\LabSolutions\Training1107\Ben B\BDB\_II\_006\_AD\_98\_2\_0.5mL.lcd

PDA Ch1 206nm 4nm

| Peak# | Ret. Time | Area     | Height  | Area %  | Height % |
|-------|-----------|----------|---------|---------|----------|
| 1     | 12.499    | 34930795 | 2027919 | 92.406  | 92.215   |
| 2     | 14.764    | 2870640  | 171193  | 7.594   | 7.785    |
| Total |           | 37801435 | 2199112 | 100.000 | 100.000  |

## ==== HPLC Analysis Report ====

Acquired by : Admin  
 Sample Name : 1  
 Sample ID : 1  
 Tray# : 1  
 Vial # : 92  
 Injection Volume : 3 uL  
 Data File Name : BDB\_II\_007\_AD\_98\_2\_0.5mL.lcd  
 Method File Name : AD-100%\_Hexanes\_20min\_0.5mL.lcm  
 Batch File Name : 20DEC2018.lcb  
 Report File Name : UCD Default.lcr  
 Data Acquired : 12/20/2018 4:34:30 PM  
 Data Processed : 12/20/2018 4:54:30 PM

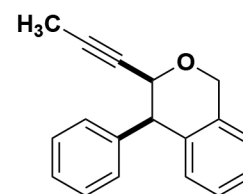

**13f**  
racemic

### <Chromatogram>

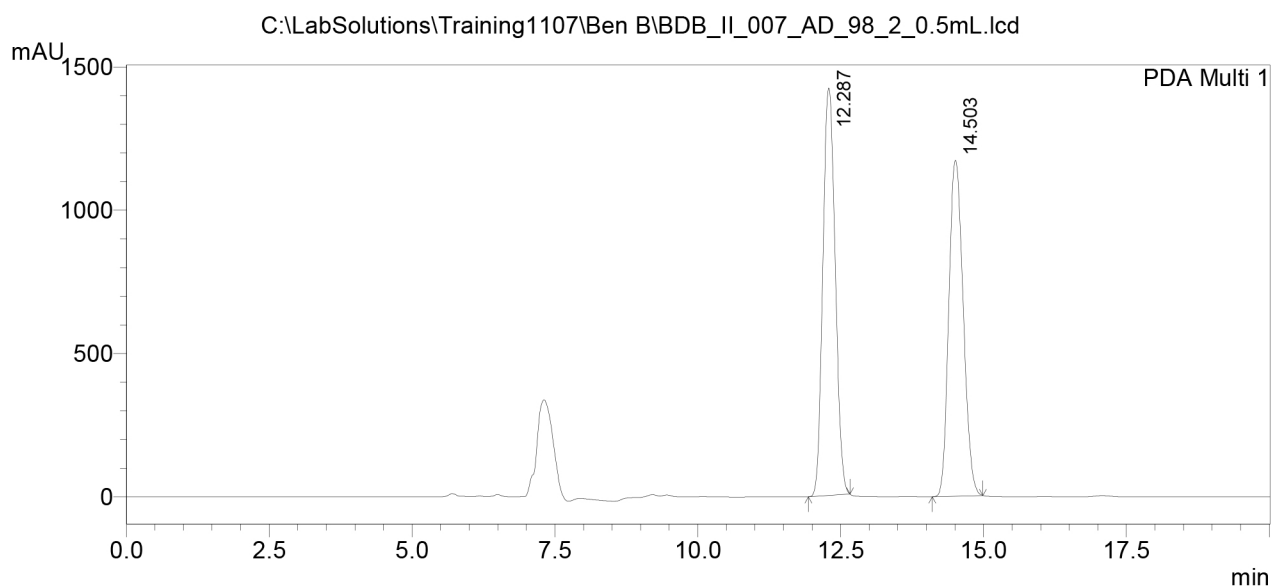

1 PDA Multi 1/206nm 4nm

### < Peak Table >

PeakTable C:\LabSolutions\Training1107\Ben B\BDB\_II\_007\_AD\_98\_2\_0.5mL.lcd

PDA Ch1 206nm 4nm

| Peak# | Ret. Time | Area     | Height  | Area %  | Height % |
|-------|-----------|----------|---------|---------|----------|
| 1     | 12.287    | 21424492 | 1421636 | 51.024  | 54.800   |
| 2     | 14.503    | 20564510 | 1172595 | 48.976  | 45.200   |
| Total |           | 41989002 | 2594231 | 100.000 | 100.000  |

## ==== HPLC Analysis Report ====

C:\LabSolutions\Training1107\Ben B\BDB\_I\_106\_AD2.lcd  
 Acquired by : Admin  
 Sample Name : 1  
 Sample ID : 1  
 Tray# : 1  
 Vial # : 96  
 Injection Volume : 10 uL  
 Data File Name : BDB\_I\_106\_AD2.lcd  
 Method File Name : AD-98\_2\_Hexane\_IPA\_15min\_0.5mL.lcm  
 Batch File Name : 30JUL2018\_3.lcb  
 Report File Name : UCD Default.lcr  
 Data Acquired : 7/30/2018 9:06:49 AM  
 Data Processed : 7/30/2018 9:21:50 AM

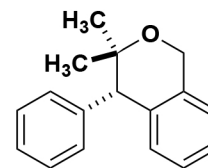

**15a**  
chiral

### <Chromatogram>

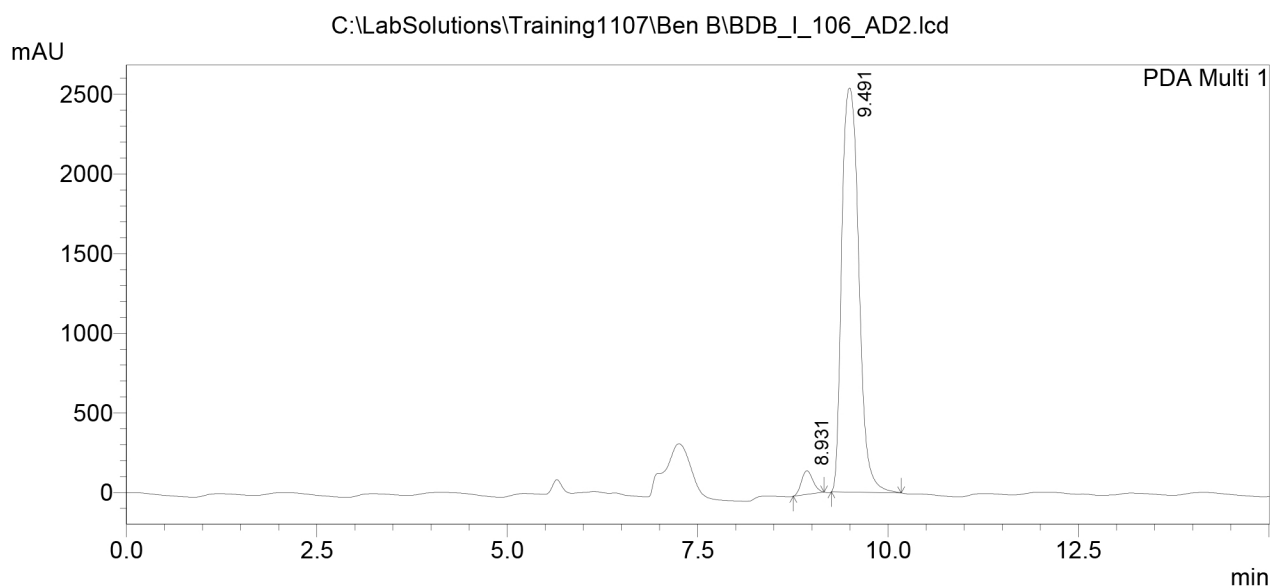

1 PDA Multi 1/206nm 4nm

### < Peak Table >

PeakTable C:\LabSolutions\Training1107\Ben B\BDB\_I\_106\_AD2.lcd

PDA Ch1 206nm 4nm

| Peak# | Ret. Time | Area     | Height  | Area %  | Height % |
|-------|-----------|----------|---------|---------|----------|
| 1     | 8.931     | 1596198  | 149975  | 3.887   | 5.582    |
| 2     | 9.491     | 39471429 | 2536622 | 96.113  | 94.418   |
| Total |           | 41067627 | 2686596 | 100.000 | 100.000  |

## ==== HPLC Analysis Report ====

C:\LabSolutions\Training1107\Ben B\BDB\_I\_107\_AD3.lcd  
 Acquired by : Admin  
 Sample Name : 1  
 Sample ID : 1  
 Tray# : 1  
 Vial # : 97  
 Injection Volume : 10 uL  
 Data File Name : BDB\_I\_107\_AD3.lcd  
 Method File Name : AD-98\_2\_Hexane\_IPA\_15min\_0.5mL.lcm  
 Batch File Name : 30JUL2018\_3.lcb  
 Report File Name : UCD Default.lcr  
 Data Acquired : 7/30/2018 8:51:22 AM  
 Data Processed : 7/30/2018 9:06:24 AM

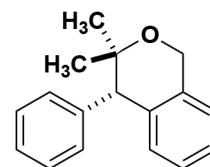

**15a**  
racemic

### <Chromatogram>

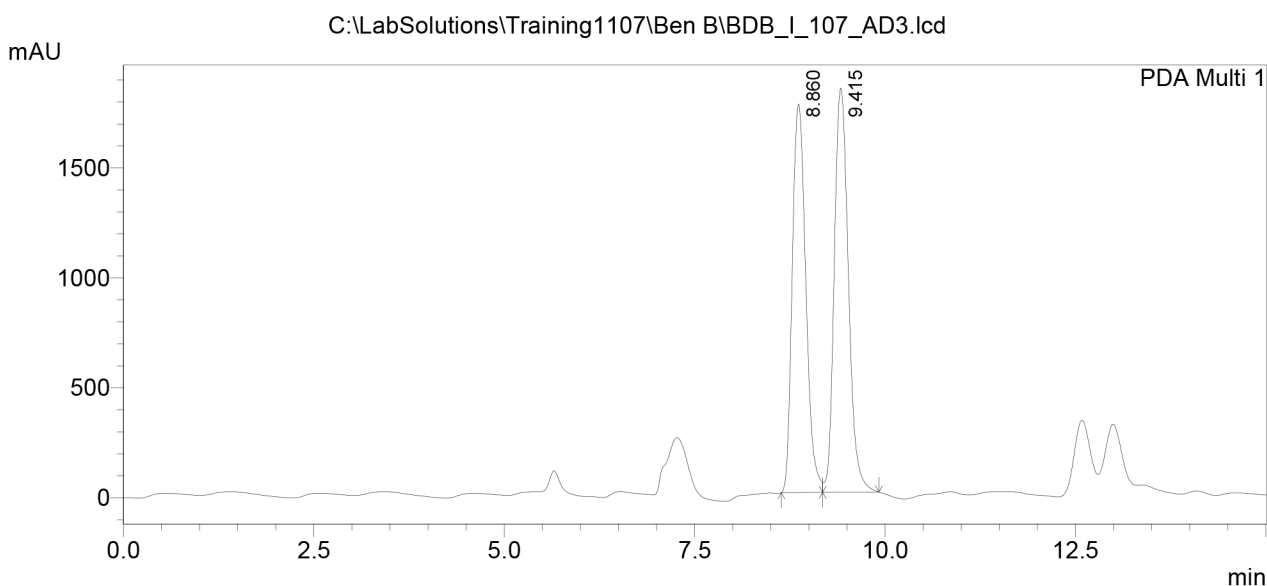

1 PDA Multi 1/206nm 4nm

### < Peak Table >

PeakTable C:\LabSolutions\Training1107\Ben B\BDB\_I\_107\_AD3.lcd

PDA Ch1 206nm 4nm

| Peak# | Ret. Time | Area     | Height  | Area %  | Height % |
|-------|-----------|----------|---------|---------|----------|
| 1     | 8.860     | 21883165 | 1767860 | 48.004  | 49.022   |
| 2     | 9.415     | 23703300 | 1838388 | 51.996  | 50.978   |
| Total |           | 45586465 | 3606248 | 100.000 | 100.000  |

## ==== HPLC Analysis Report ====

Acquired by : Admin  
 Sample Name : 1  
 Sample ID : 1  
 Tray# : 1  
 Vial # : 4  
 Injection Volume : 2 uL  
 Data File Name : BDB\_II\_110\_OD\_99\_1\_1mL\_30min.lcd  
 Method File Name : OD-90\_10\_Hexane\_IPA\_30min.lcm  
 Batch File Name : 01JUN2019.lcb  
 Report File Name : UCD Default.lcr  
 Data Acquired : 6/1/2019 12:48:19 PM  
 Data Processed : 6/1/2019 1:18:21 PM

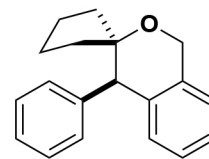

**15b**  
chiral

### <Chromatogram>

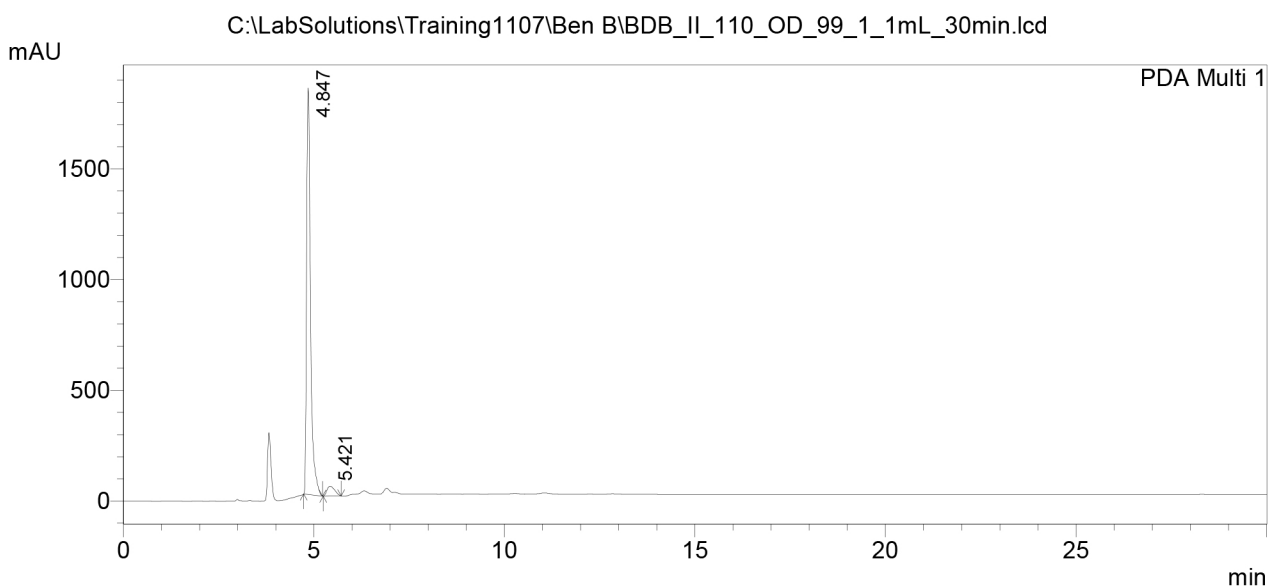

### < Peak Table >

PeakTable C:\LabSolutions\Training1107\Ben B\BDB\_II\_110\_OD\_99\_1\_1mL\_30min.lcd

PDA Ch1 205nm 4nm

| Peak# | Ret. Time | Area     | Height  | Area %  | Height % |
|-------|-----------|----------|---------|---------|----------|
| 1     | 4.847     | 13133076 | 1835936 | 95.400  | 97.636   |
| 2     | 5.421     | 633188   | 44454   | 4.600   | 2.364    |
| Total |           | 13766264 | 1880390 | 100.000 | 100.000  |



## ==== HPLC Analysis Report ====

Acquired by : Admin  
 Sample Name : 1  
 Sample ID : 1  
 Tray# : 1  
 Vial # : 70  
 Injection Volume : 5 uL  
 Data File Name : BDB\_I\_177\_OD\_99\_1.lcd  
 Method File Name : OD-100\_0\_Hexane\_IPA\_30min.lcm  
 Batch File Name : 03DEC2018.lcb  
 Report File Name : UCD Default.lcr  
 Data Acquired : 12/3/2018 11:55:11 PM  
 Data Processed : 12/4/2018 12:25:13 AM

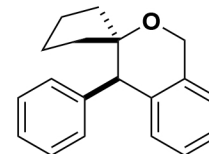

**15b**  
racemic

### <Chromatogram>

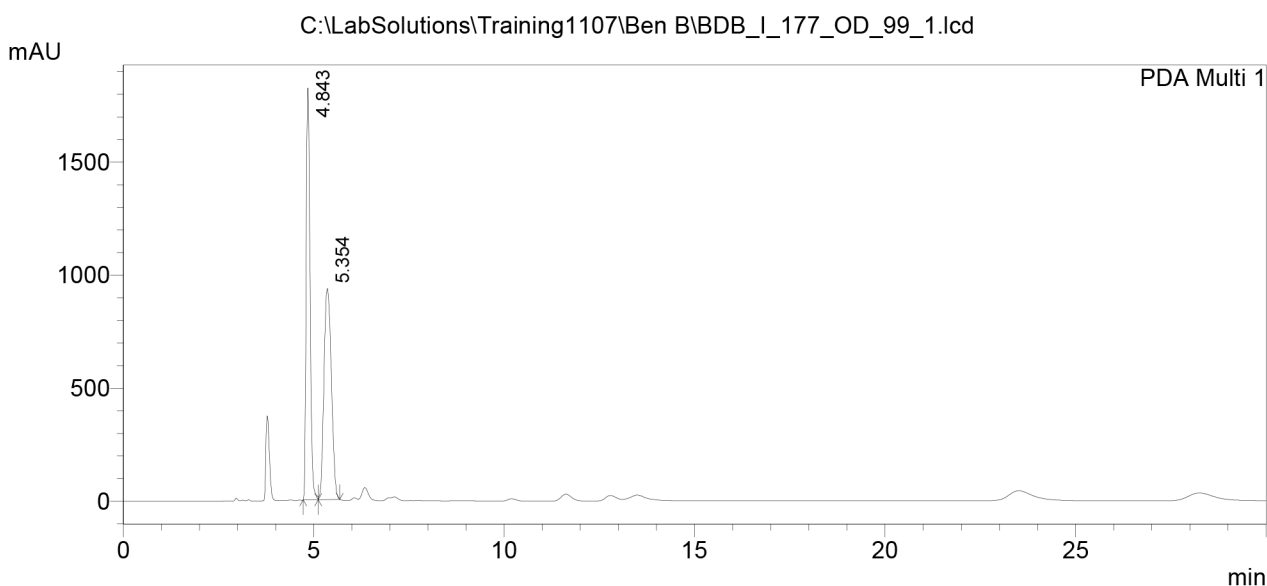

1 PDA Multi 1/205nm 4nm

### < Peak Table >

PeakTable C:\LabSolutions\Training1107\Ben B\BDB\_I\_177\_OD\_99\_1.lcd

PDA Ch1 205nm 4nm

| Peak# | Ret. Time | Area     | Height  | Area %  | Height % |
|-------|-----------|----------|---------|---------|----------|
| 1     | 4.843     | 12918307 | 1821349 | 50.490  | 66.116   |
| 2     | 5.354     | 12667469 | 933445  | 49.510  | 33.884   |
| Total |           | 25585776 | 2754794 | 100.000 | 100.000  |

## ==== HPLC Analysis Report ====

Acquired by : Admin  
 Sample Name : 1  
 Sample ID : 1  
 Tray# : 1  
 Vial # : 2  
 Injection Volume : 2 uL  
 Data File Name : BDB\_II\_102\_AD\_99\_1\_0.4mL\_20min.lcd  
 Method File Name : AD-90\_10\_Hexane\_IPA\_20min\_0.4mL.lcm  
 Batch File Name : 31MAY2019.lcb  
 Report File Name : UCD Default.lcr  
 Data Acquired : 5/31/2019 8:30:03 PM  
 Data Processed : 5/31/2019 8:50:04 PM

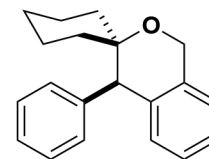

**15c**  
chiral

### <Chromatogram>

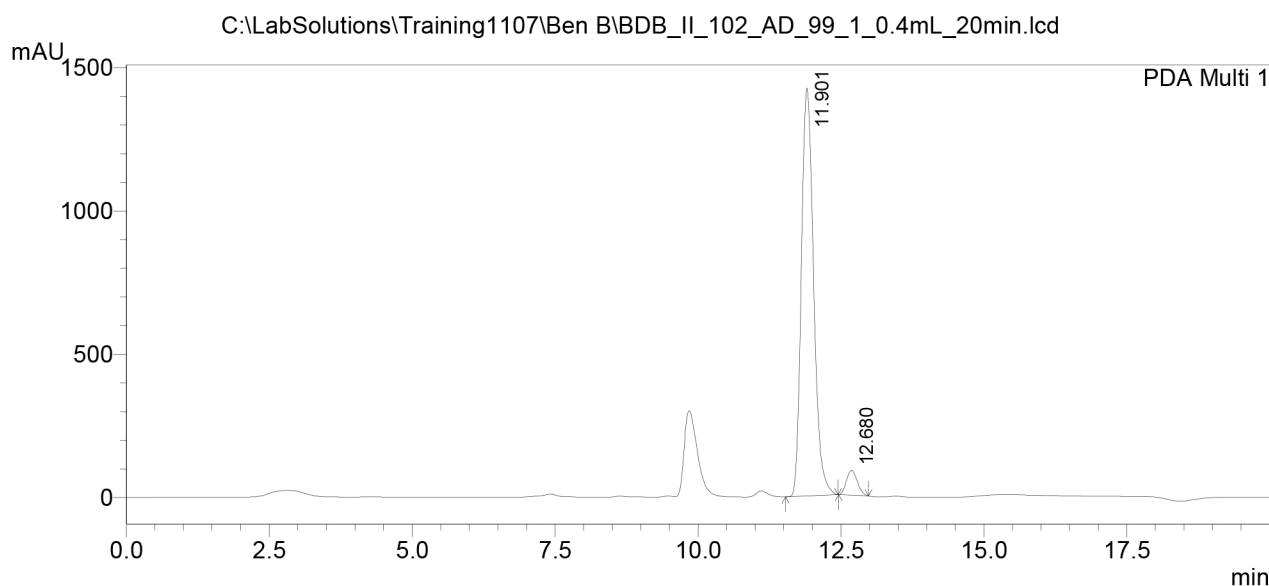

1 PDA Multi 1/204nm 4nm

### < Peak Table >

PeakTable C:\LabSolutions\Training1107\Ben B\BDB\_II\_102\_AD\_99\_1\_0.4mL\_20min.lcd

PDA Ch1 204nm 4nm

| Peak# | Ret. Time | Area     | Height  | Area %  | Height % |
|-------|-----------|----------|---------|---------|----------|
| 1     | 11.901    | 21205026 | 1423918 | 94.860  | 94.265   |
| 2     | 12.680    | 1148958  | 86626   | 5.140   | 5.735    |
| Total |           | 22353985 | 1510545 | 100.000 | 100.000  |

## ==== HPLC Analysis Report ====

Acquired by : Admin  
 Sample Name : 1  
 Sample ID : 1  
 Tray# : 1  
 Vial # : 3  
 Injection Volume : 2 uL  
 Data File Name : BDB\_II\_103\_AD\_99\_1\_0.4mL\_20min.lcd  
 Method File Name : AD-90\_10\_Hexane\_IPA\_20min\_0.4mL.lcm  
 Batch File Name : 31MAY2019.lcb  
 Report File Name : UCD Default.lcr  
 Data Acquired : 5/31/2019 8:09:36 PM  
 Data Processed : 5/31/2019 8:29:39 PM

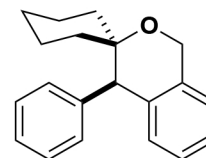

**15c**  
racemic

### <Chromatogram>

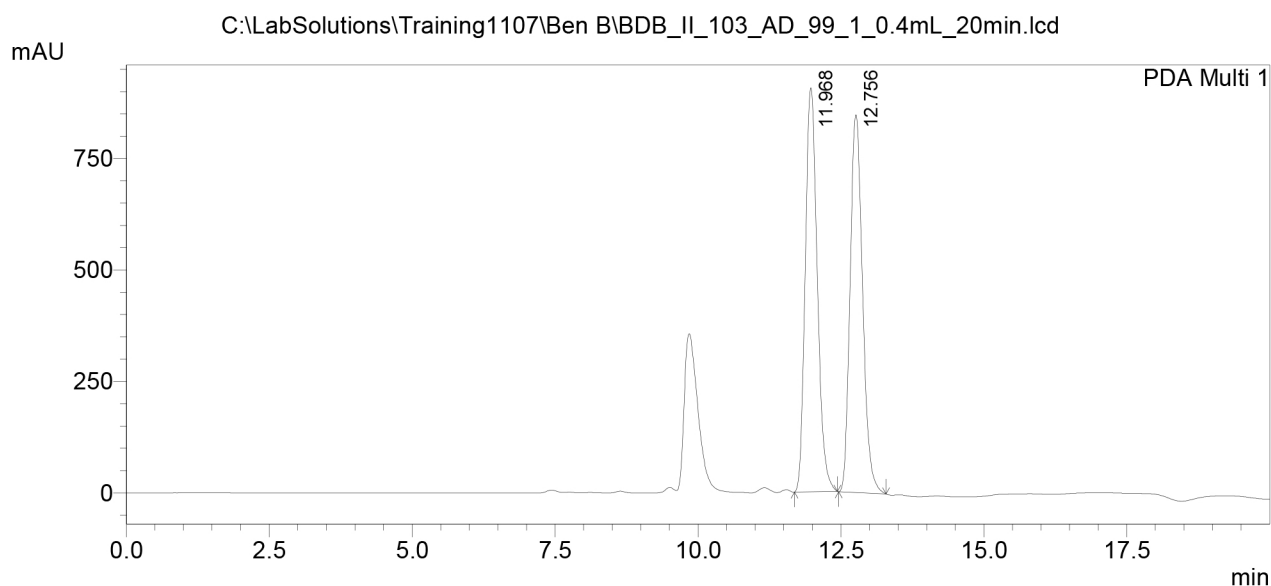

1 PDA Multi 1/204nm 4nm

### < Peak Table >

PeakTable C:\LabSolutions\Training1107\Ben B\BDB\_II\_103\_AD\_99\_1\_0.4mL\_20min.lcd

PDA Ch1 204nm 4nm

| Peak# | Ret. Time | Area     | Height  | Area %  | Height % |
|-------|-----------|----------|---------|---------|----------|
| 1     | 11.968    | 13259527 | 905585  | 50.711  | 51.655   |
| 2     | 12.756    | 12887700 | 847559  | 49.289  | 48.345   |
| Total |           | 26147227 | 1753144 | 100.000 | 100.000  |

## ==== HPLC Analysis Report ====

C:\LabSolutions\Training1107\MRC\MRCI\_022a\_OD\_98\_2.lcd  
 Acquired by : Admin  
 Sample Name : 1  
 Sample ID : 1  
 Tray# : 1  
 Vial # : 63  
 Injection Volume : 10 uL  
 Data File Name : MRCI\_022a\_OD\_98\_2.lcd  
 Method File Name : OD-98\_2\_Hexane\_IPA\_35min.lcm  
 Batch File Name : 7-18-18.lcb  
 Report File Name : UCD Default.lcr  
 Data Acquired : 7/18/2018 12:13:59 PM  
 Data Processed : 7/18/2018 12:49:02 PM

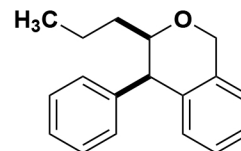

**15d**  
chiral

### <Chromatogram>

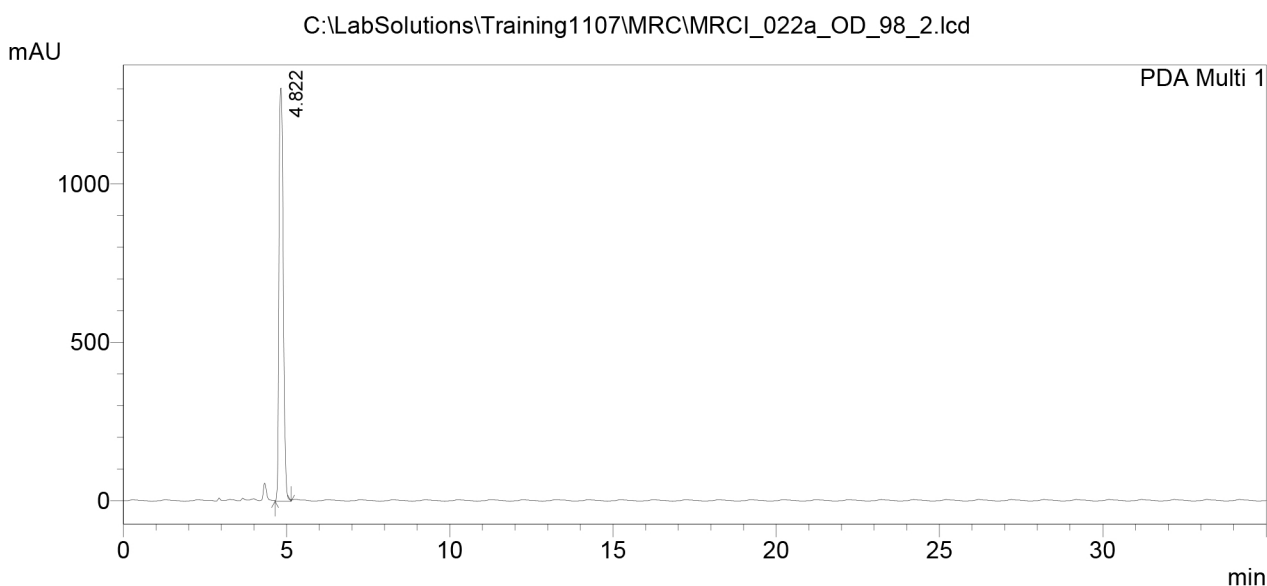

### < Peak Table >

PeakTable C:\LabSolutions\Training1107\MRC\MRCI\_022a\_OD\_98\_2.lcd

PDA Ch1 222nm 4nm

| Peak# | Ret. Time | Area     | Height  | Area %  | Height % |
|-------|-----------|----------|---------|---------|----------|
| 1     | 4.822     | 11988170 | 1304698 | 100.000 | 100.000  |
| Total |           | 11988170 | 1304698 | 100.000 | 100.000  |

## ==== HPLC Analysis Report ====

C:\LabSolutions\Training1107\MRC\MRCI\_021a\_98\_2\_OD.lcd  
 Acquired by : Admin  
 Sample Name : 1  
 Sample ID : 1  
 Tray# : 1  
 Vial # : 91  
 Injection Volume : 10 uL  
 Data File Name : MRCI\_021a\_98\_2\_OD.lcd  
 Method File Name : OD-98\_2\_Hexane\_IPA\_35min.lcm  
 Batch File Name : 6-29-18.lcb  
 Report File Name : UCD Default.lcr  
 Data Acquired : 6/29/2018 8:02:17 AM  
 Data Processed : 6/29/2018 8:37:19 AM

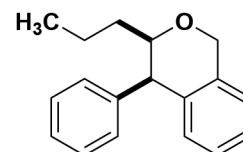

**15d**  
racemic

### <Chromatogram>

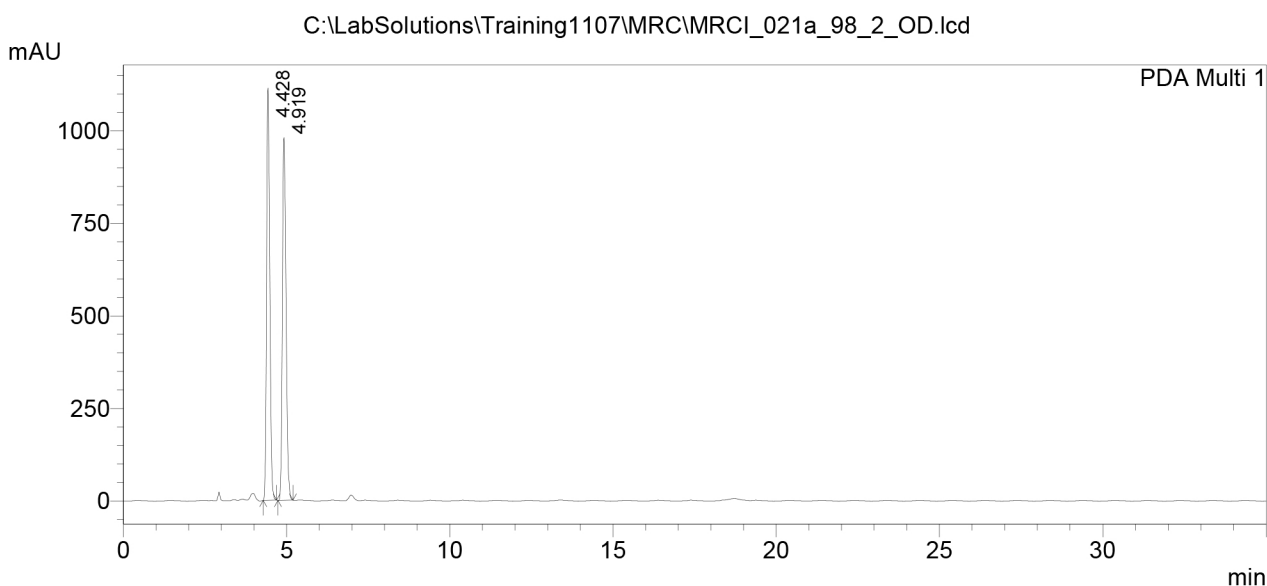

### < Peak Table >

PeakTable C:\LabSolutions\Training1107\MRC\MRCI\_021a\_98\_2\_OD.lcd

PDA Ch1 215nm 0nm

| Peak# | Ret. Time | Area     | Height  | Area %  | Height % |
|-------|-----------|----------|---------|---------|----------|
| 1     | 4.428     | 7613902  | 1113876 | 49.853  | 53.186   |
| 2     | 4.919     | 7658908  | 980426  | 50.147  | 46.814   |
| Total |           | 15272810 | 2094302 | 100.000 | 100.000  |

## ==== HPLC Analysis Report ====

C:\LabSolutions\Training1107\MRC\MRCI\_033a\_OD\_98\_2.lcd  
 Acquired by : Admin  
 Sample Name : 1  
 Sample ID : 1  
 Tray# : 1  
 Vial # : 61  
 Injection Volume : 10 uL  
 Data File Name : MRCI\_033a\_OD\_98\_2.lcd  
 Method File Name : OD-98\_2\_Hexane\_IPA\_35min.lcm  
 Batch File Name : 05SEP2018\_2.lcb  
 Report File Name : UCD Default.lcr  
 Data Acquired : 9/6/2018 12:57:23 PM  
 Data Processed : 9/6/2018 1:32:23 PM

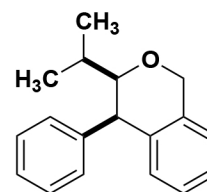

**15e**  
chiral

### <Chromatogram>

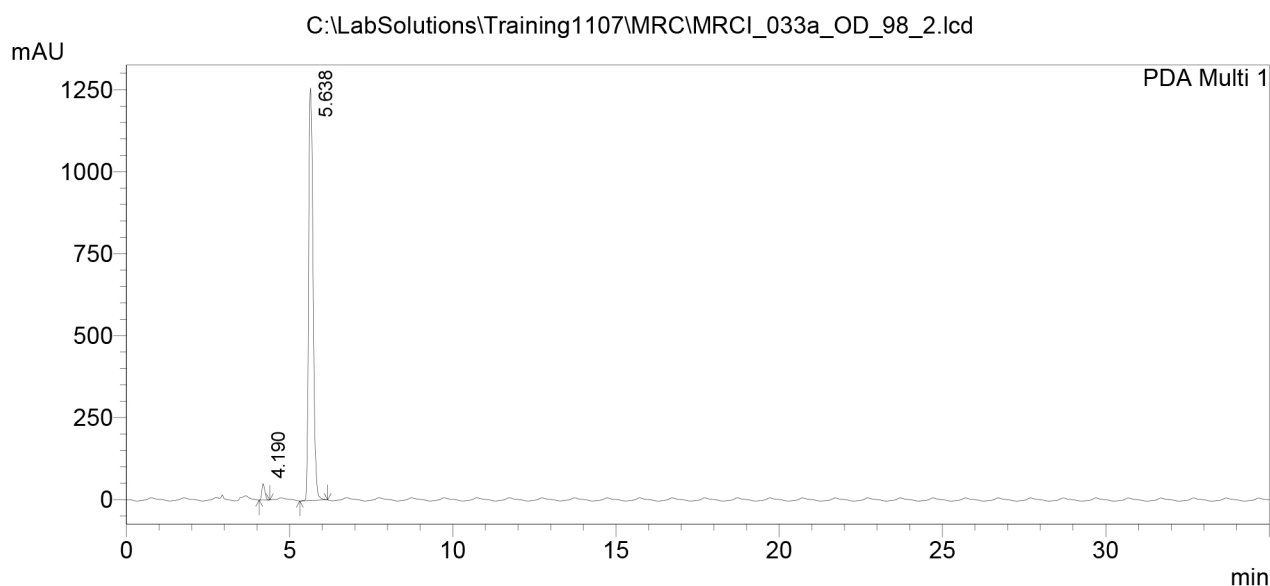

1 PDA Multi 1/222nm 4nm

### < Peak Table >

PeakTable C:\LabSolutions\Training1107\MRC\MRCI\_033a\_OD\_98\_2.lcd

PDA Ch1 222nm 4nm

| Peak# | Ret. Time | Area     | Height  | Area %  | Height % |
|-------|-----------|----------|---------|---------|----------|
| 1     | 4.190     | 317905   | 49680   | 2.579   | 3.799    |
| 2     | 5.638     | 12008642 | 1258172 | 97.421  | 96.201   |
| Total |           | 12326547 | 1307853 | 100.000 | 100.000  |

## ==== HPLC Analysis Report ====

C:\LabSolutions\Training1107\MRC\MRCI\_032a\_OD\_98\_2.lcd  
 Acquired by : Admin  
 Sample Name : 1  
 Sample ID : 1  
 Tray# : 1  
 Vial # : 46  
 Injection Volume : 10 uL  
 Data File Name : MRCI\_032a\_OD\_98\_2.lcd  
 Method File Name : OD-98\_2\_Hexane\_IPA\_35min.lcm  
 Batch File Name : 05SEP2018.lcb  
 Report File Name : UCD Default.lcr  
 Data Acquired : 9/6/2018 11:31:47 AM  
 Data Processed : 9/6/2018 12:06:48 PM

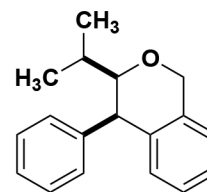

**15e**  
racemic

### <Chromatogram>

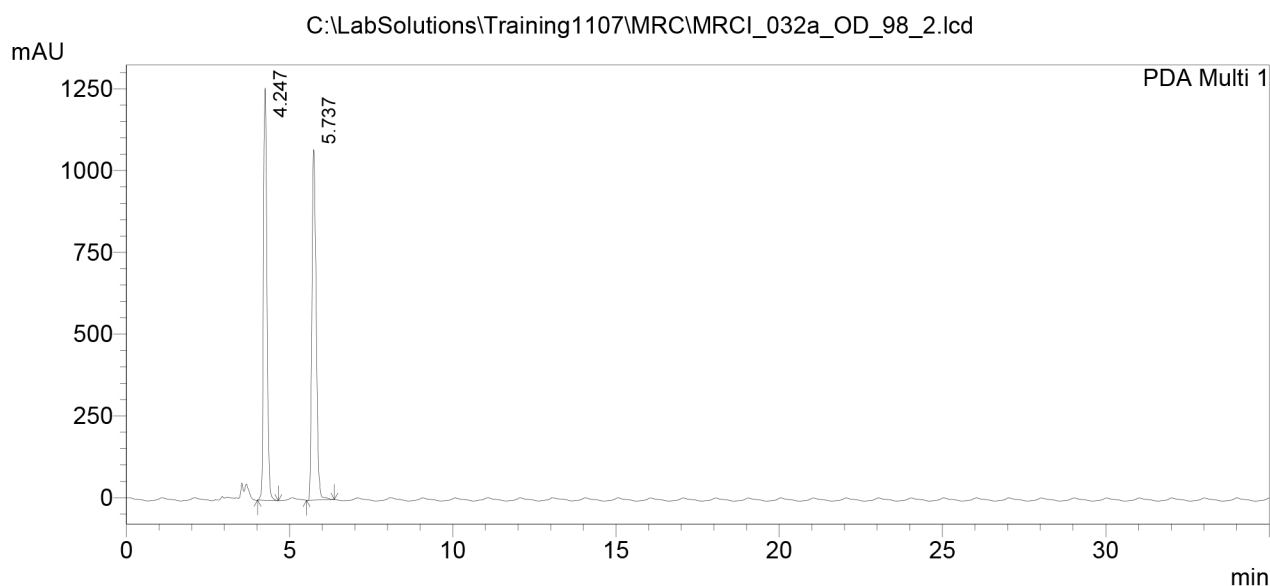

### < Peak Table >

PeakTable C:\LabSolutions\Training1107\MRC\MRCI\_032a\_OD\_98\_2.lcd

PDA Ch1 222nm 4nm

| Peak# | Ret. Time | Area     | Height  | Area %  | Height % |
|-------|-----------|----------|---------|---------|----------|
| 1     | 4.247     | 9376189  | 1260561 | 48.750  | 54.028   |
| 2     | 5.737     | 9857158  | 1072622 | 51.250  | 45.972   |
| Total |           | 19233348 | 2333183 | 100.000 | 100.000  |

## ==== HPLC Analysis Report ====

C:\LabSolutions\Training1107\LAN\LAN-IV-091a\_AD1.lcd  
 Acquired by : Admin  
 Sample Name : LAN-IV-091a  
 Sample ID : LAN-IV-091a  
 Tray# : 1  
 Vial # : 92  
 Injection Volume : 5 uL  
 Data File Name : LAN-IV-091a\_AD1.lcd  
 Method File Name : AD-90\_10\_Hexane\_IPA\_45min.lcm  
 Batch File Name : 12.18.18.lcb  
 Report File Name : UCD Default.lcr  
 Data Acquired : 12/18/2018 12:50:22 PM  
 Data Processed : 12/18/2018 1:41:38 PM

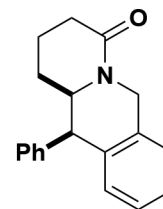

**23a**  
chiral

### <Chromatogram>

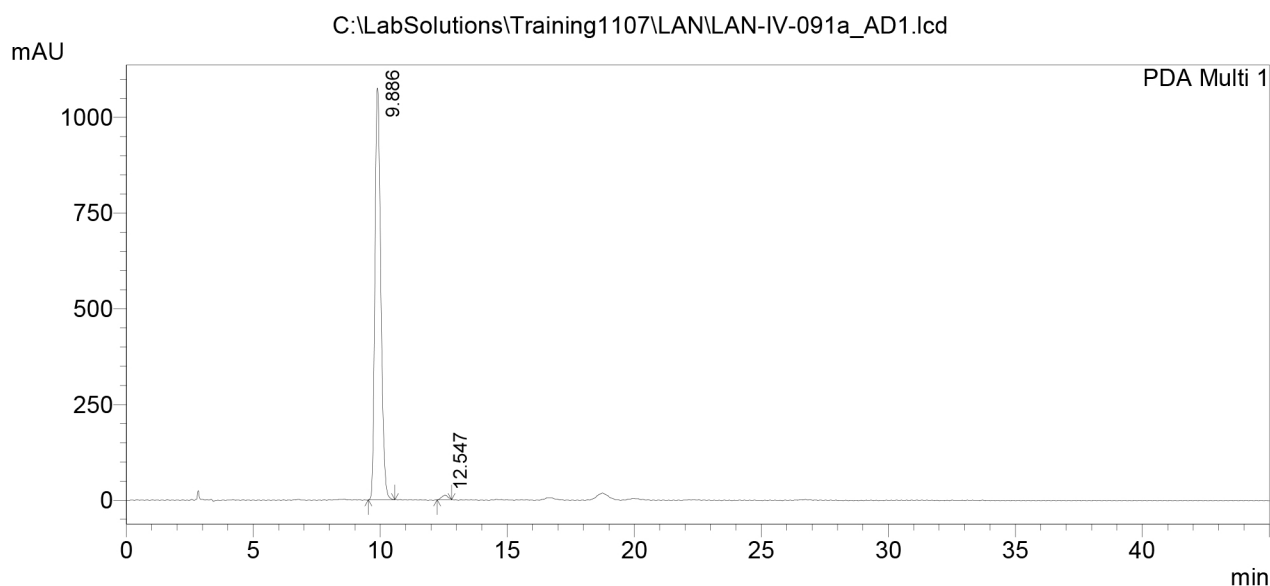

### < Peak Table >

PeakTable C:\LabSolutions\Training1107\LAN\LAN-IV-091a\_AD1.lcd

PDA Ch1 207nm 4nm

| Peak# | Ret. Time | Area     | Height  | Area %  | Height % |
|-------|-----------|----------|---------|---------|----------|
| 1     | 9.886     | 17324845 | 1075560 | 98.816  | 98.892   |
| 2     | 12.547    | 207596   | 12048   | 1.184   | 1.108    |
| Total |           | 17532441 | 1087608 | 100.000 | 100.000  |



### ==== HPLC Analysis Report ====

Acquired by : Admin  
 Sample Name : LAN-IV-095a  
 Sample ID : LAN-IV-095a  
 Tray# : 1  
 Vial # : 91  
 Injection Volume : 5 uL  
 Data File Name : LAN-IV-095a\_AD1.lcd  
 Method File Name : AD-90\_10\_Hexane\_IPA\_60min\_1mLmin.lcm  
 Batch File Name : 12.18.18.lcb  
 Report File Name : UCD Default.lcr  
 Data Acquired : 12/18/2018 11:39:46 AM  
 Data Processed : 12/18/2018 1:42:03 PM

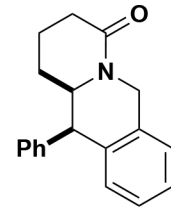

**23a**  
racemic

#### <Chromatogram>

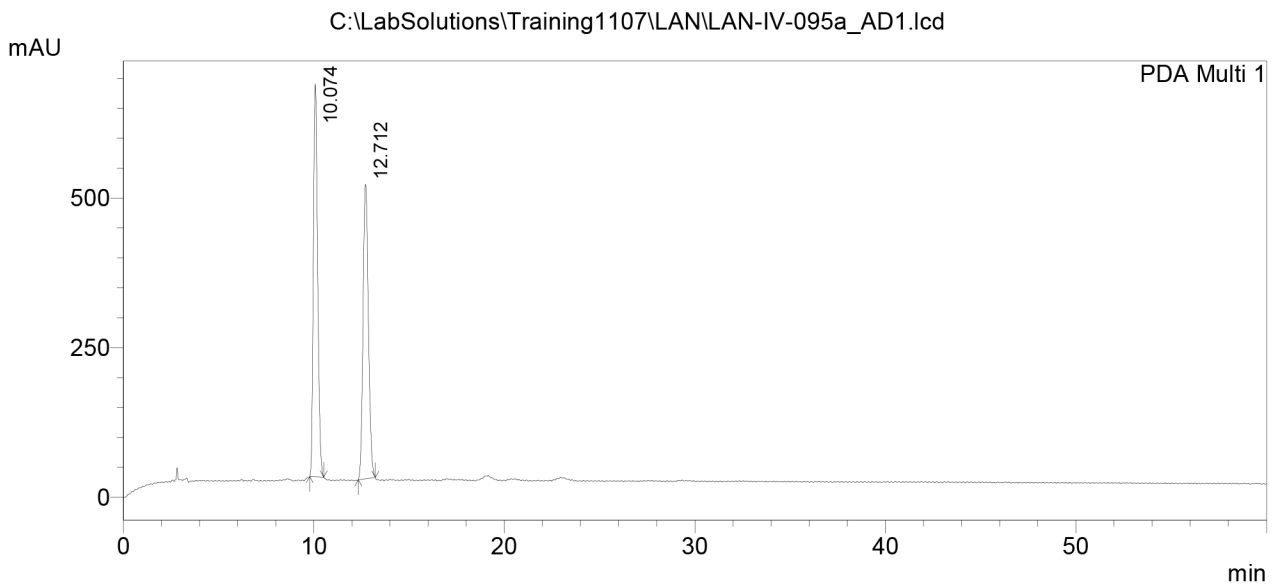

#### < Peak Table >

PeakTable C:\LabSolutions\Training1107\LAN\LAN-IV-095a\_AD1.lcd

PDA Ch1 207nm 4nm

| Peak# | Ret. Time | Area     | Height  | Area %  | Height % |
|-------|-----------|----------|---------|---------|----------|
| 1     | 10.074    | 10266411 | 656606  | 51.641  | 57.142   |
| 2     | 12.712    | 9613764  | 492476  | 48.359  | 42.858   |
| Total |           | 19880175 | 1149082 | 100.000 | 100.000  |

## ==== HPLC Analysis Report ====

C:\LabSolutions\Training1107\LAN\LAN-IV-152A\_AD1.lcd  
 Acquired by : Admin  
 Sample Name : LAN-IV-152A  
 Sample ID : LAN-IV-152A  
 Tray# : 1  
 Vial # : 63  
 Injection Volume : 5 uL  
 Data File Name : LAN-IV-152A\_AD1.lcd  
 Method File Name : AD-90\_10\_Hexane\_IPA\_30min.lcm  
 Batch File Name : 5.2.19.lcb  
 Report File Name : UCD Default.lcr  
 Data Acquired : 5/2/2019 3:23:44 PM  
 Data Processed : 5/2/2019 3:53:46 PM

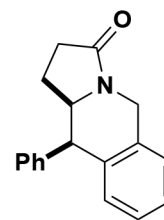

**23b**  
chiral

### <Chromatogram>

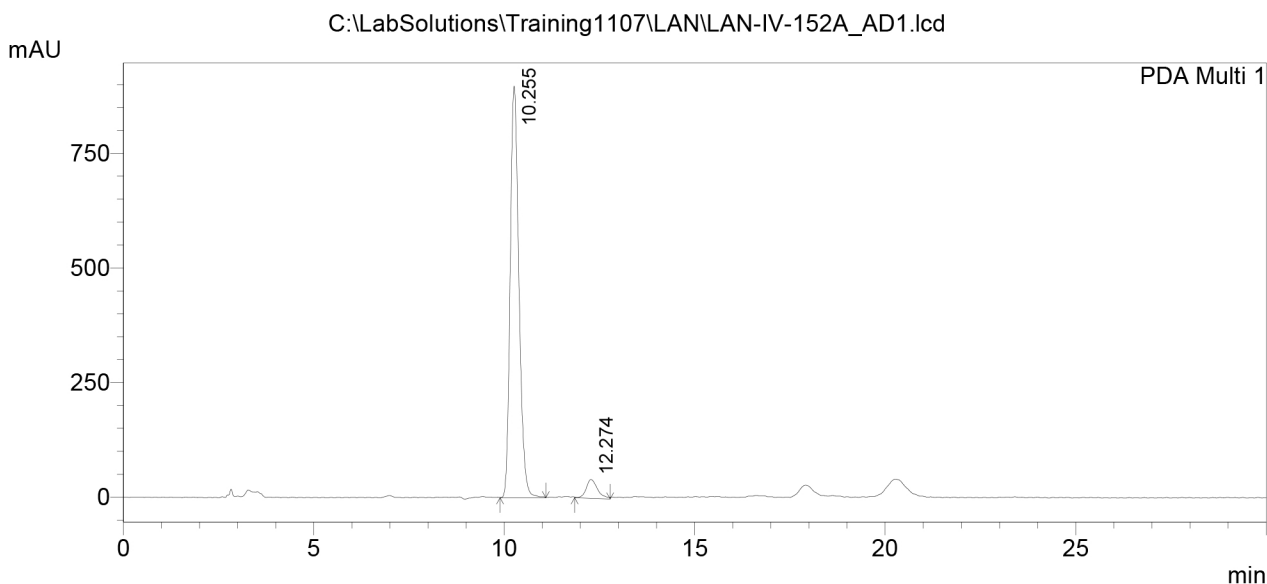

1 PDA Multi 1/209nm 4nm

### < Peak Table >

PeakTable C:\LabSolutions\Training1107\LAN\LAN-IV-152A\_AD1.lcd

PDA Ch1 209nm 4nm

| Peak# | Ret. Time | Area     | Height | Area %  | Height % |
|-------|-----------|----------|--------|---------|----------|
| 1     | 10.255    | 14291014 | 897949 | 94.365  | 95.627   |
| 2     | 12.274    | 853337   | 41065  | 5.635   | 4.373    |
| Total |           | 15144351 | 939015 | 100.000 | 100.000  |

**==== HPLC Analysis Report ====**

C:\LabSolutions\Training1107\LAN\LAN-IV-159B\_AD1.lcd  
 Acquired by : Admin  
 Sample Name : LAN-IV-159B  
 Sample ID : LAN-IV-159B  
 Tray# : 1  
 Vial # : 62  
 Injection Volume : 5 uL  
 Data File Name : LAN-IV-159B\_AD1.lcd  
 Method File Name : AD-90\_10\_Hexane\_IPA\_30min.lcm  
 Batch File Name : 5.2.19.lcb  
 Report File Name : UCD Default.lcr  
 Data Acquired : 5/2/2019 2:43:07 PM  
 Data Processed : 5/2/2019 3:43:10 PM

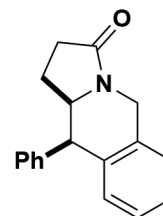

**23b**  
racemic

**<Chromatogram>**
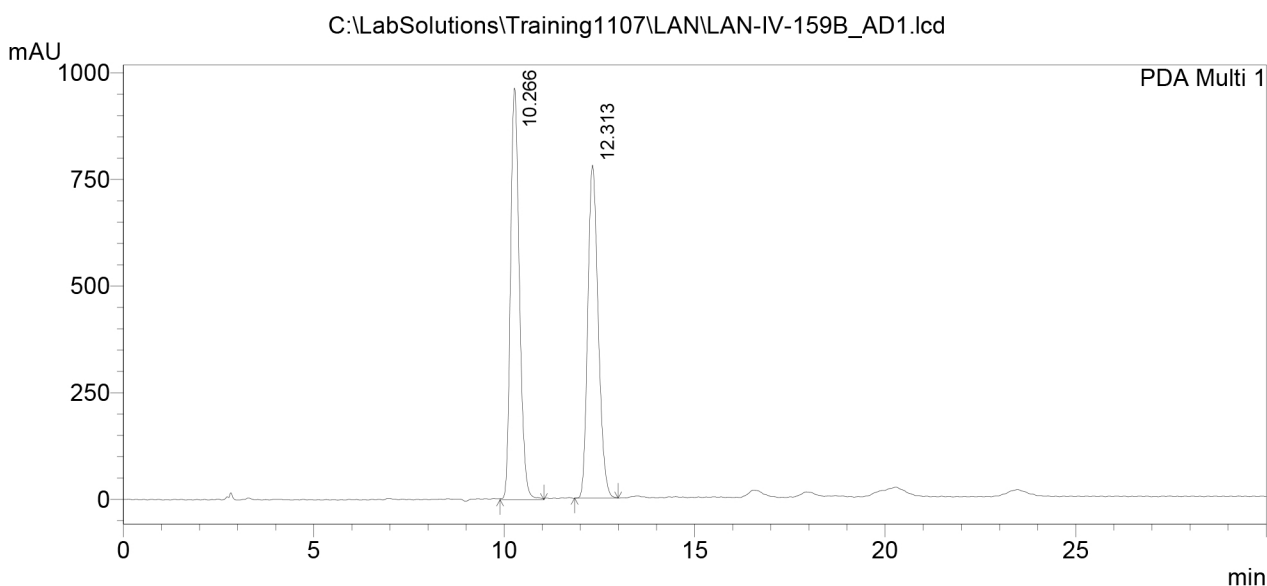
**< Peak Table >**

PeakTable C:\LabSolutions\Training1107\LAN\LAN-IV-159B\_AD1.lcd

PDA Ch1 207nm 4nm

| Peak# | Ret. Time | Area     | Height  | Area %  | Height % |
|-------|-----------|----------|---------|---------|----------|
| 1     | 10.266    | 15724723 | 965545  | 51.325  | 55.275   |
| 2     | 12.313    | 14913040 | 781263  | 48.675  | 44.725   |
| Total |           | 30637763 | 1746808 | 100.000 | 100.000  |

**==== HPLC Analysis Report ====**

C:\LabSolutions\Training1107\LAN\LAN-IV-178a\_AD2.lcd  
 Acquired by : Admin  
 Sample Name : LAN-IV-178a\_AD1.lcd  
 Sample ID : LAN-IV-178a\_AD7.lcd  
 Tray# : 1  
 Vial # : 63  
 Injection Volume : 5 uL  
 Data File Name : LAN-IV-178a\_AD2.lcd  
 Method File Name : AD-100%IPA-40min.lcm  
 Batch File Name : 5.31.19.lcb  
 Report File Name : UCD Default.lcr  
 Data Acquired : 5/31/2019 3:39:50 PM  
 Data Processed : 5/31/2019 4:19:54 PM

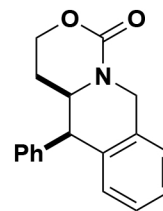

**23c**  
chiral

**<Chromatogram>**
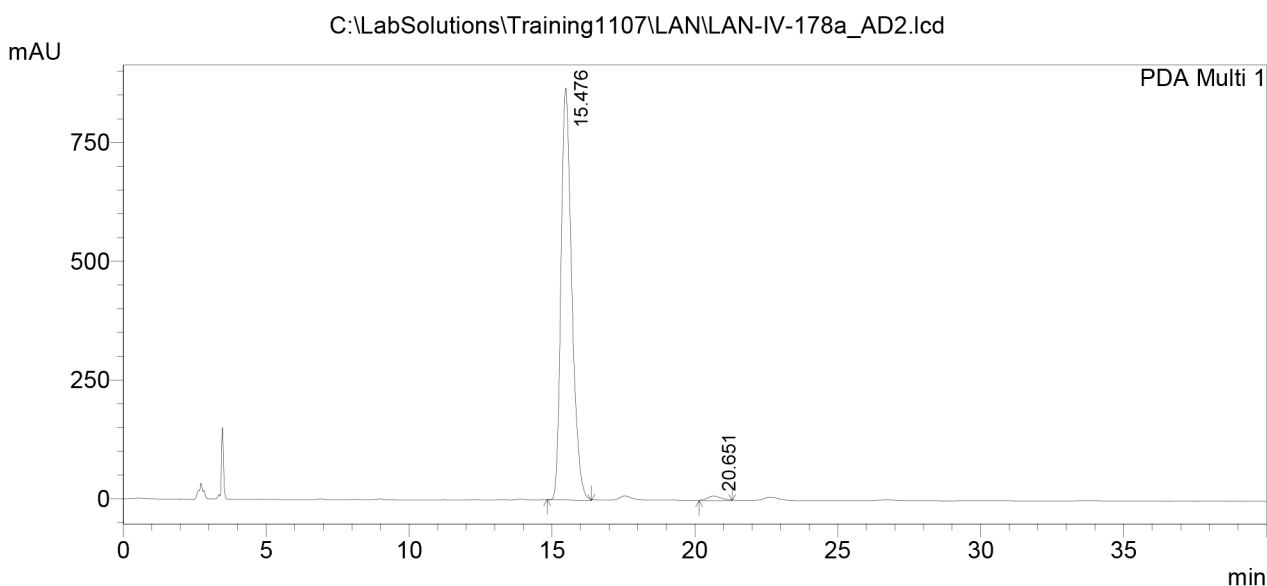

1 PDA Multi 1/206nm 4nm

**< Peak Table >**

PeakTable C:\LabSolutions\Training1107\LAN\LAN-IV-178a\_AD2.lcd

PDA Ch1 206nm 4nm

| Peak# | Ret. Time | Area     | Height | Area %  | Height % |
|-------|-----------|----------|--------|---------|----------|
| 1     | 15.476    | 22796550 | 867573 | 98.580  | 98.916   |
| 2     | 20.651    | 328491   | 9511   | 1.420   | 1.084    |
| Total |           | 23125040 | 877084 | 100.000 | 100.000  |

## ==== HPLC Analysis Report ====

Acquired by : Admin  
 Sample Name : LAN-IV-177c\_AD1.lcd  
 Sample ID : LAN-IV-177c\_AD1.lcd  
 Tray# : 1  
 Vial # : 62  
 Injection Volume : 5 uL  
 Data File Name : LAN-IV-177c\_AD\_90\_10HIPA6.lcd  
 Method File Name : AD-100%IPA-40min.lcm  
 Batch File Name : 5.31.19.lcb  
 Report File Name : UCD Default.lcr  
 Data Acquired : 5/31/2019 1:03:35 PM  
 Data Processed : 5/31/2019 1:43:38 PM

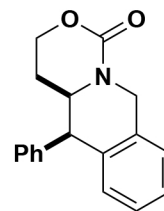

**23c**  
racemic

### <Chromatogram>

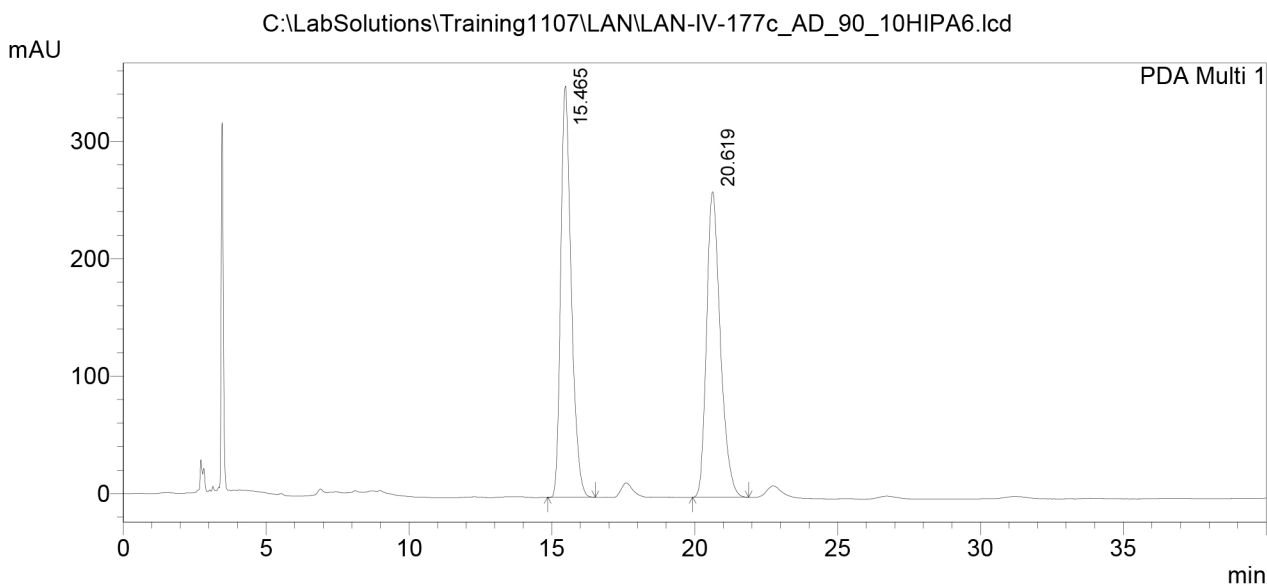

### < Peak Table >

PeakTable C:\LabSolutions\Training1107\LAN\LAN-IV-177c\_AD\_90\_10HIPA6.lcd

PDA Ch1 206nm 4nm

| Peak# | Ret. Time | Area     | Height | Area %  | Height % |
|-------|-----------|----------|--------|---------|----------|
| 1     | 15.465    | 8921007  | 350105 | 50.563  | 57.376   |
| 2     | 20.619    | 8722206  | 260091 | 49.437  | 42.624   |
| Total |           | 17643213 | 610196 | 100.000 | 100.000  |

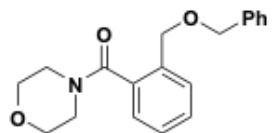

**32**

<sup>1</sup>H, 400 MHz, CDCl<sub>3</sub>

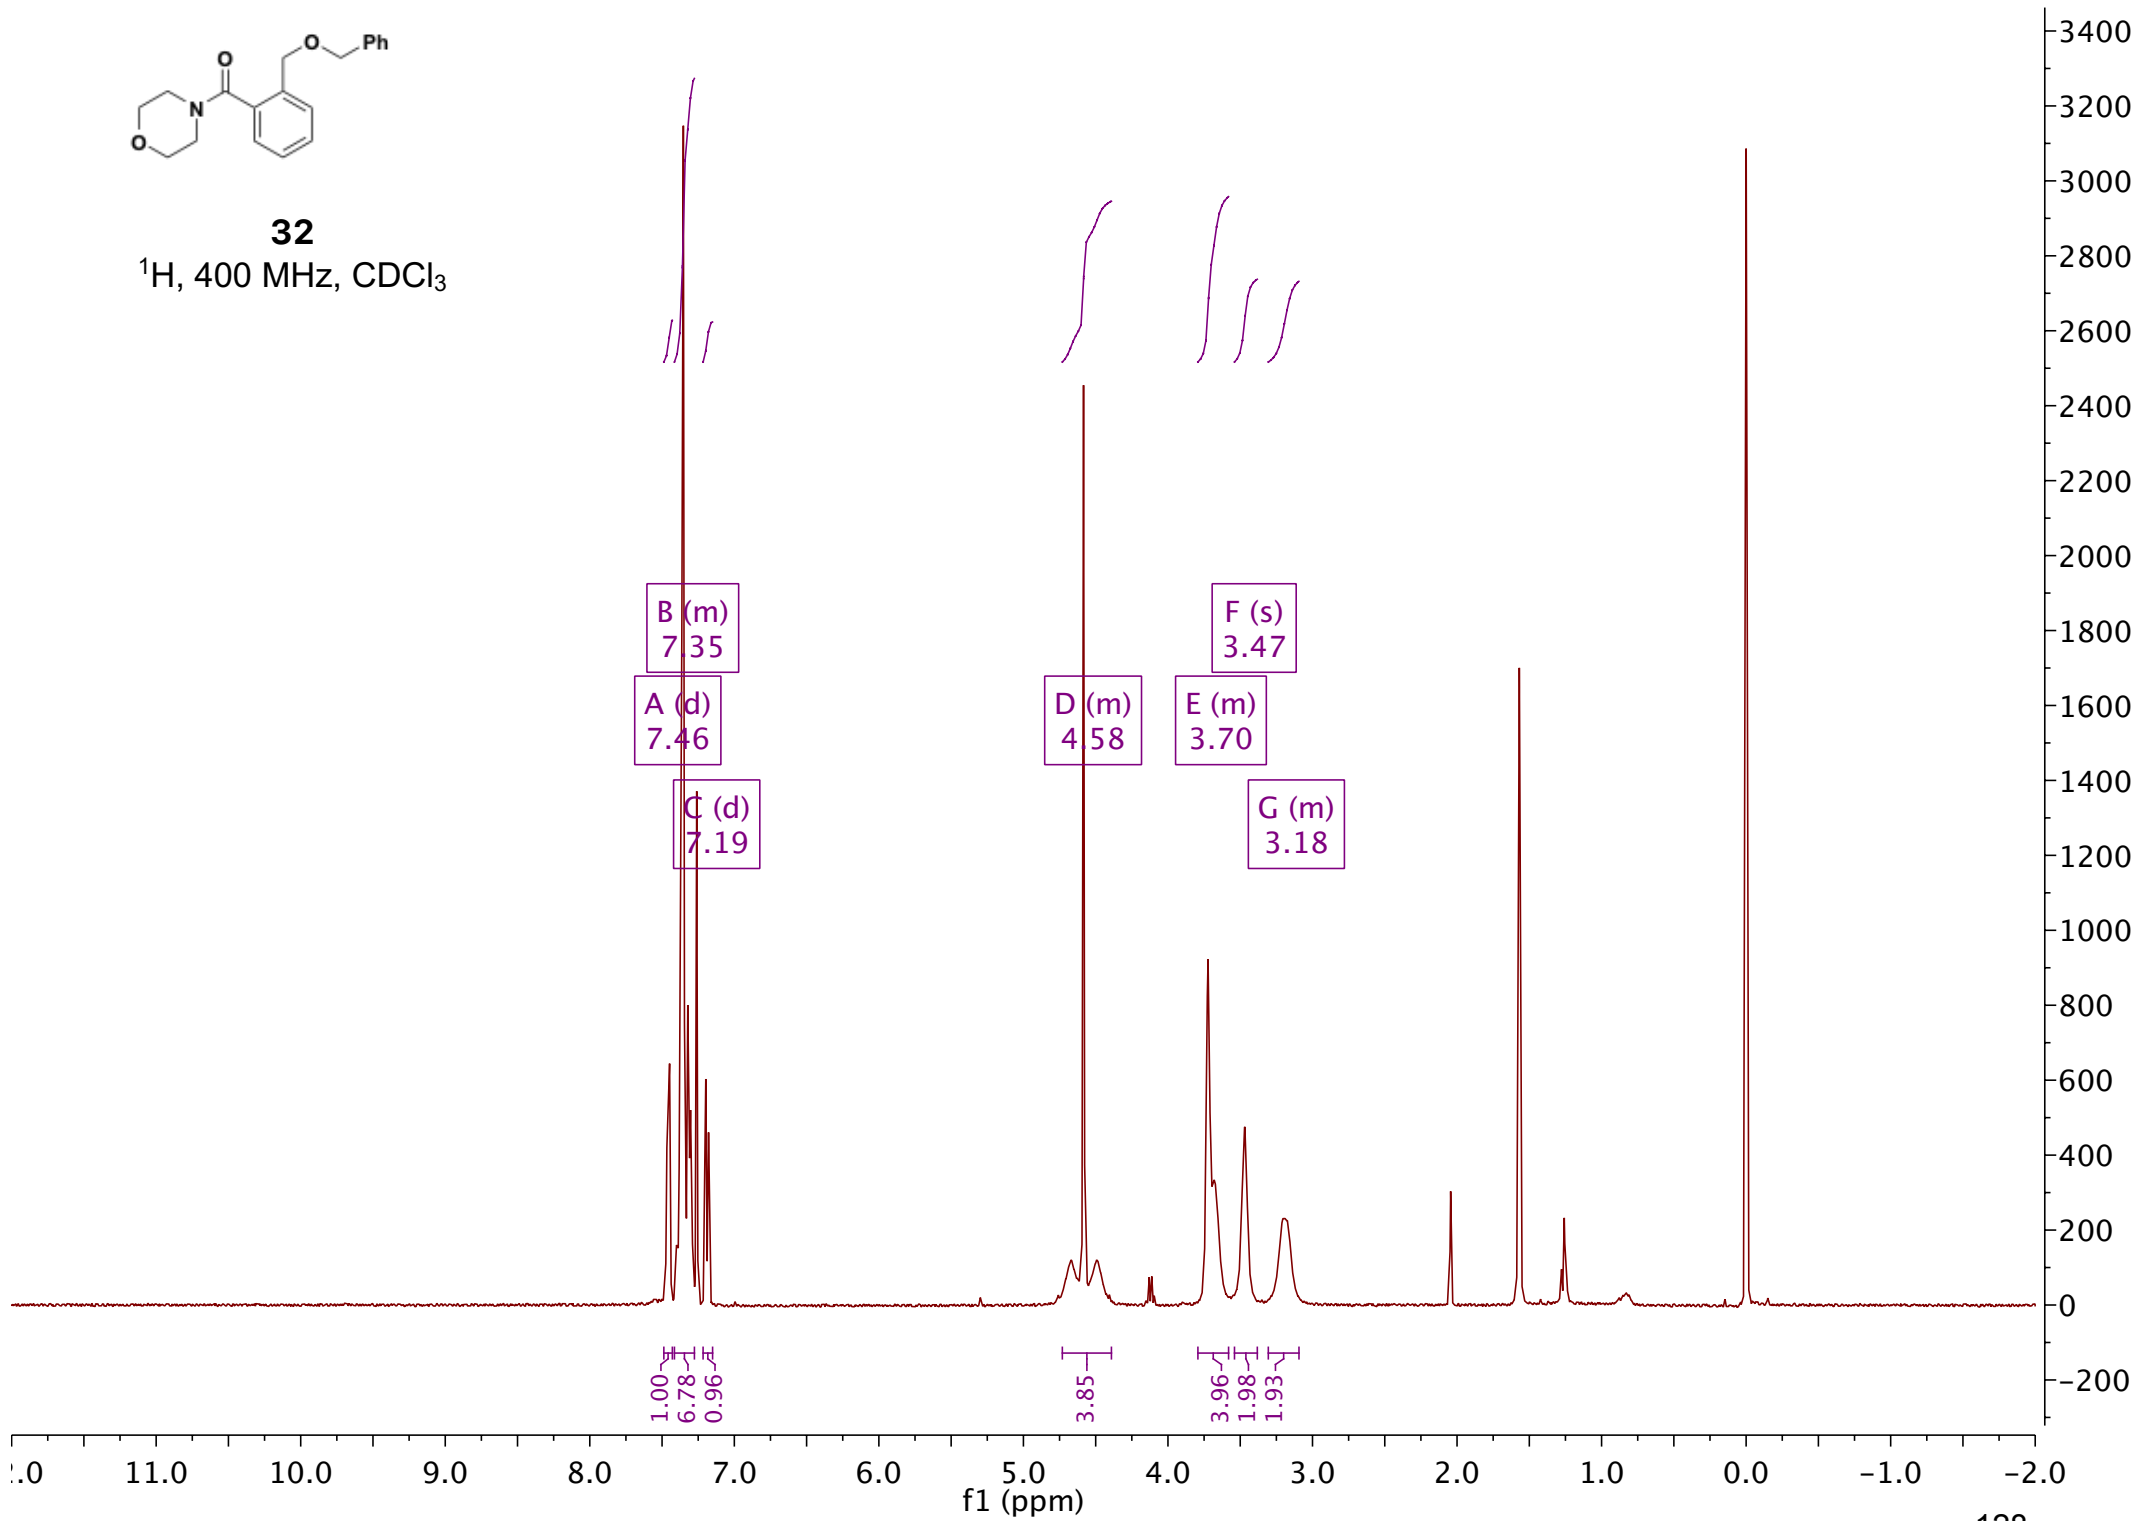

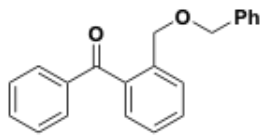

**33**

$^1\text{H}$ , 600 MHz,  $\text{CDCl}_3$

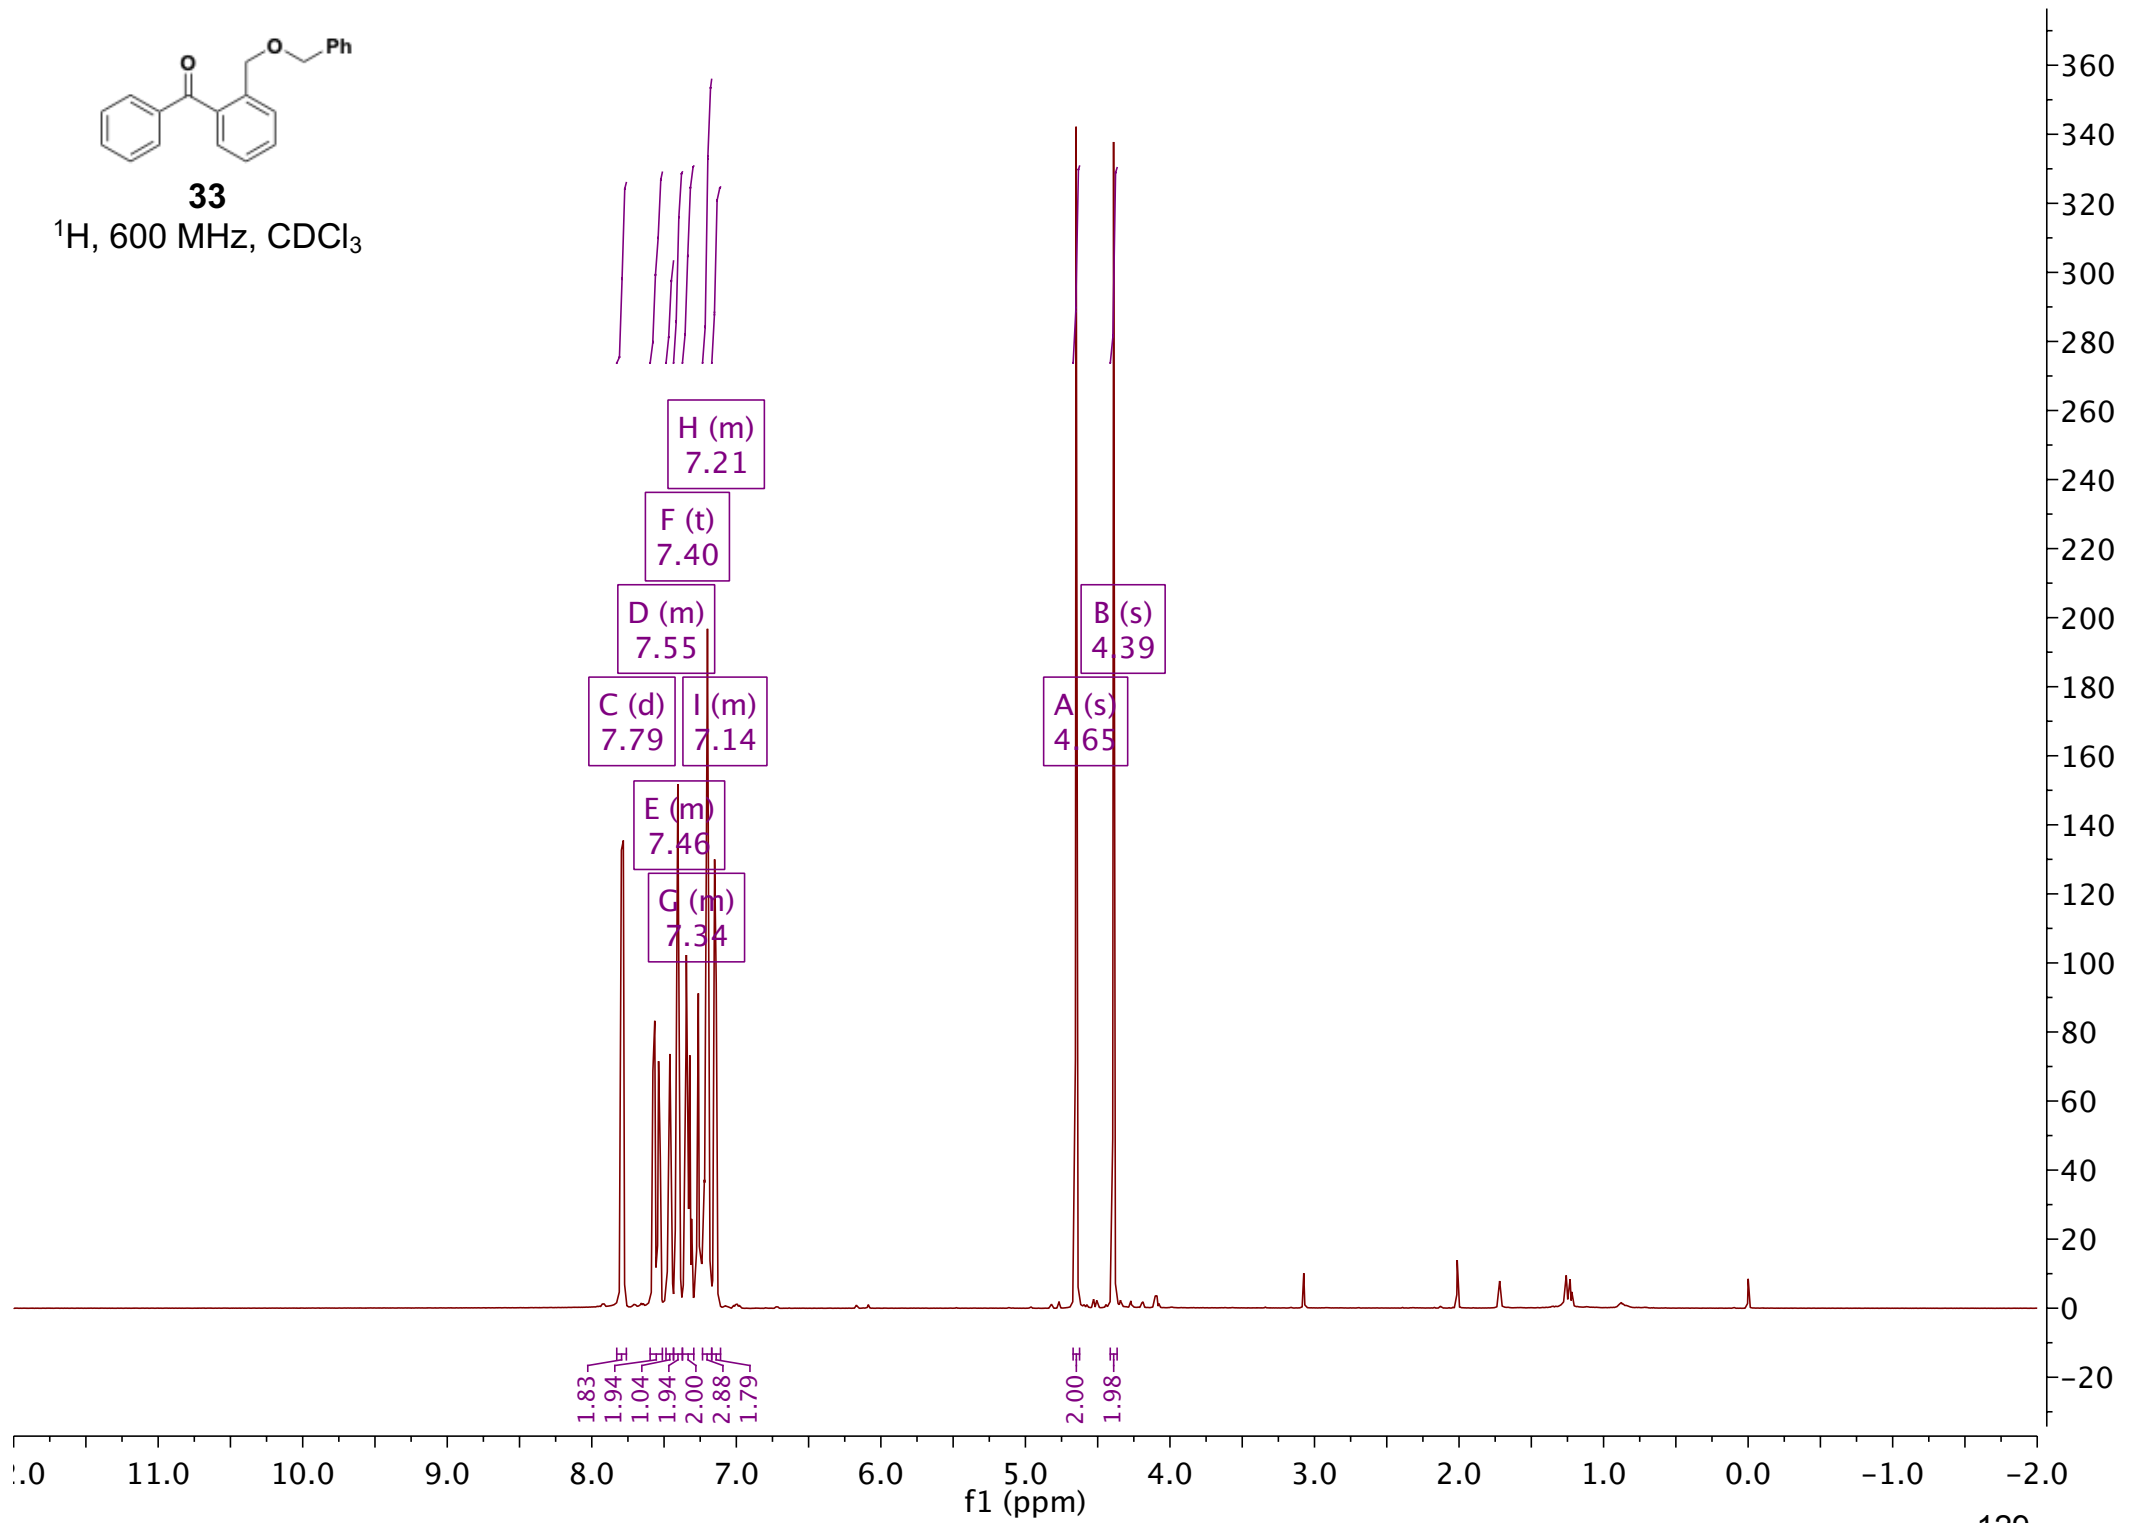

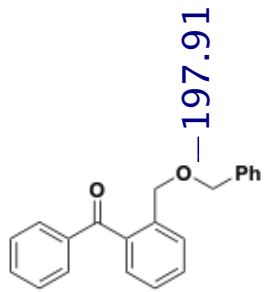

**33**

$^{13}\text{C}$ , 150 MHz,  $\text{CDCl}_3$

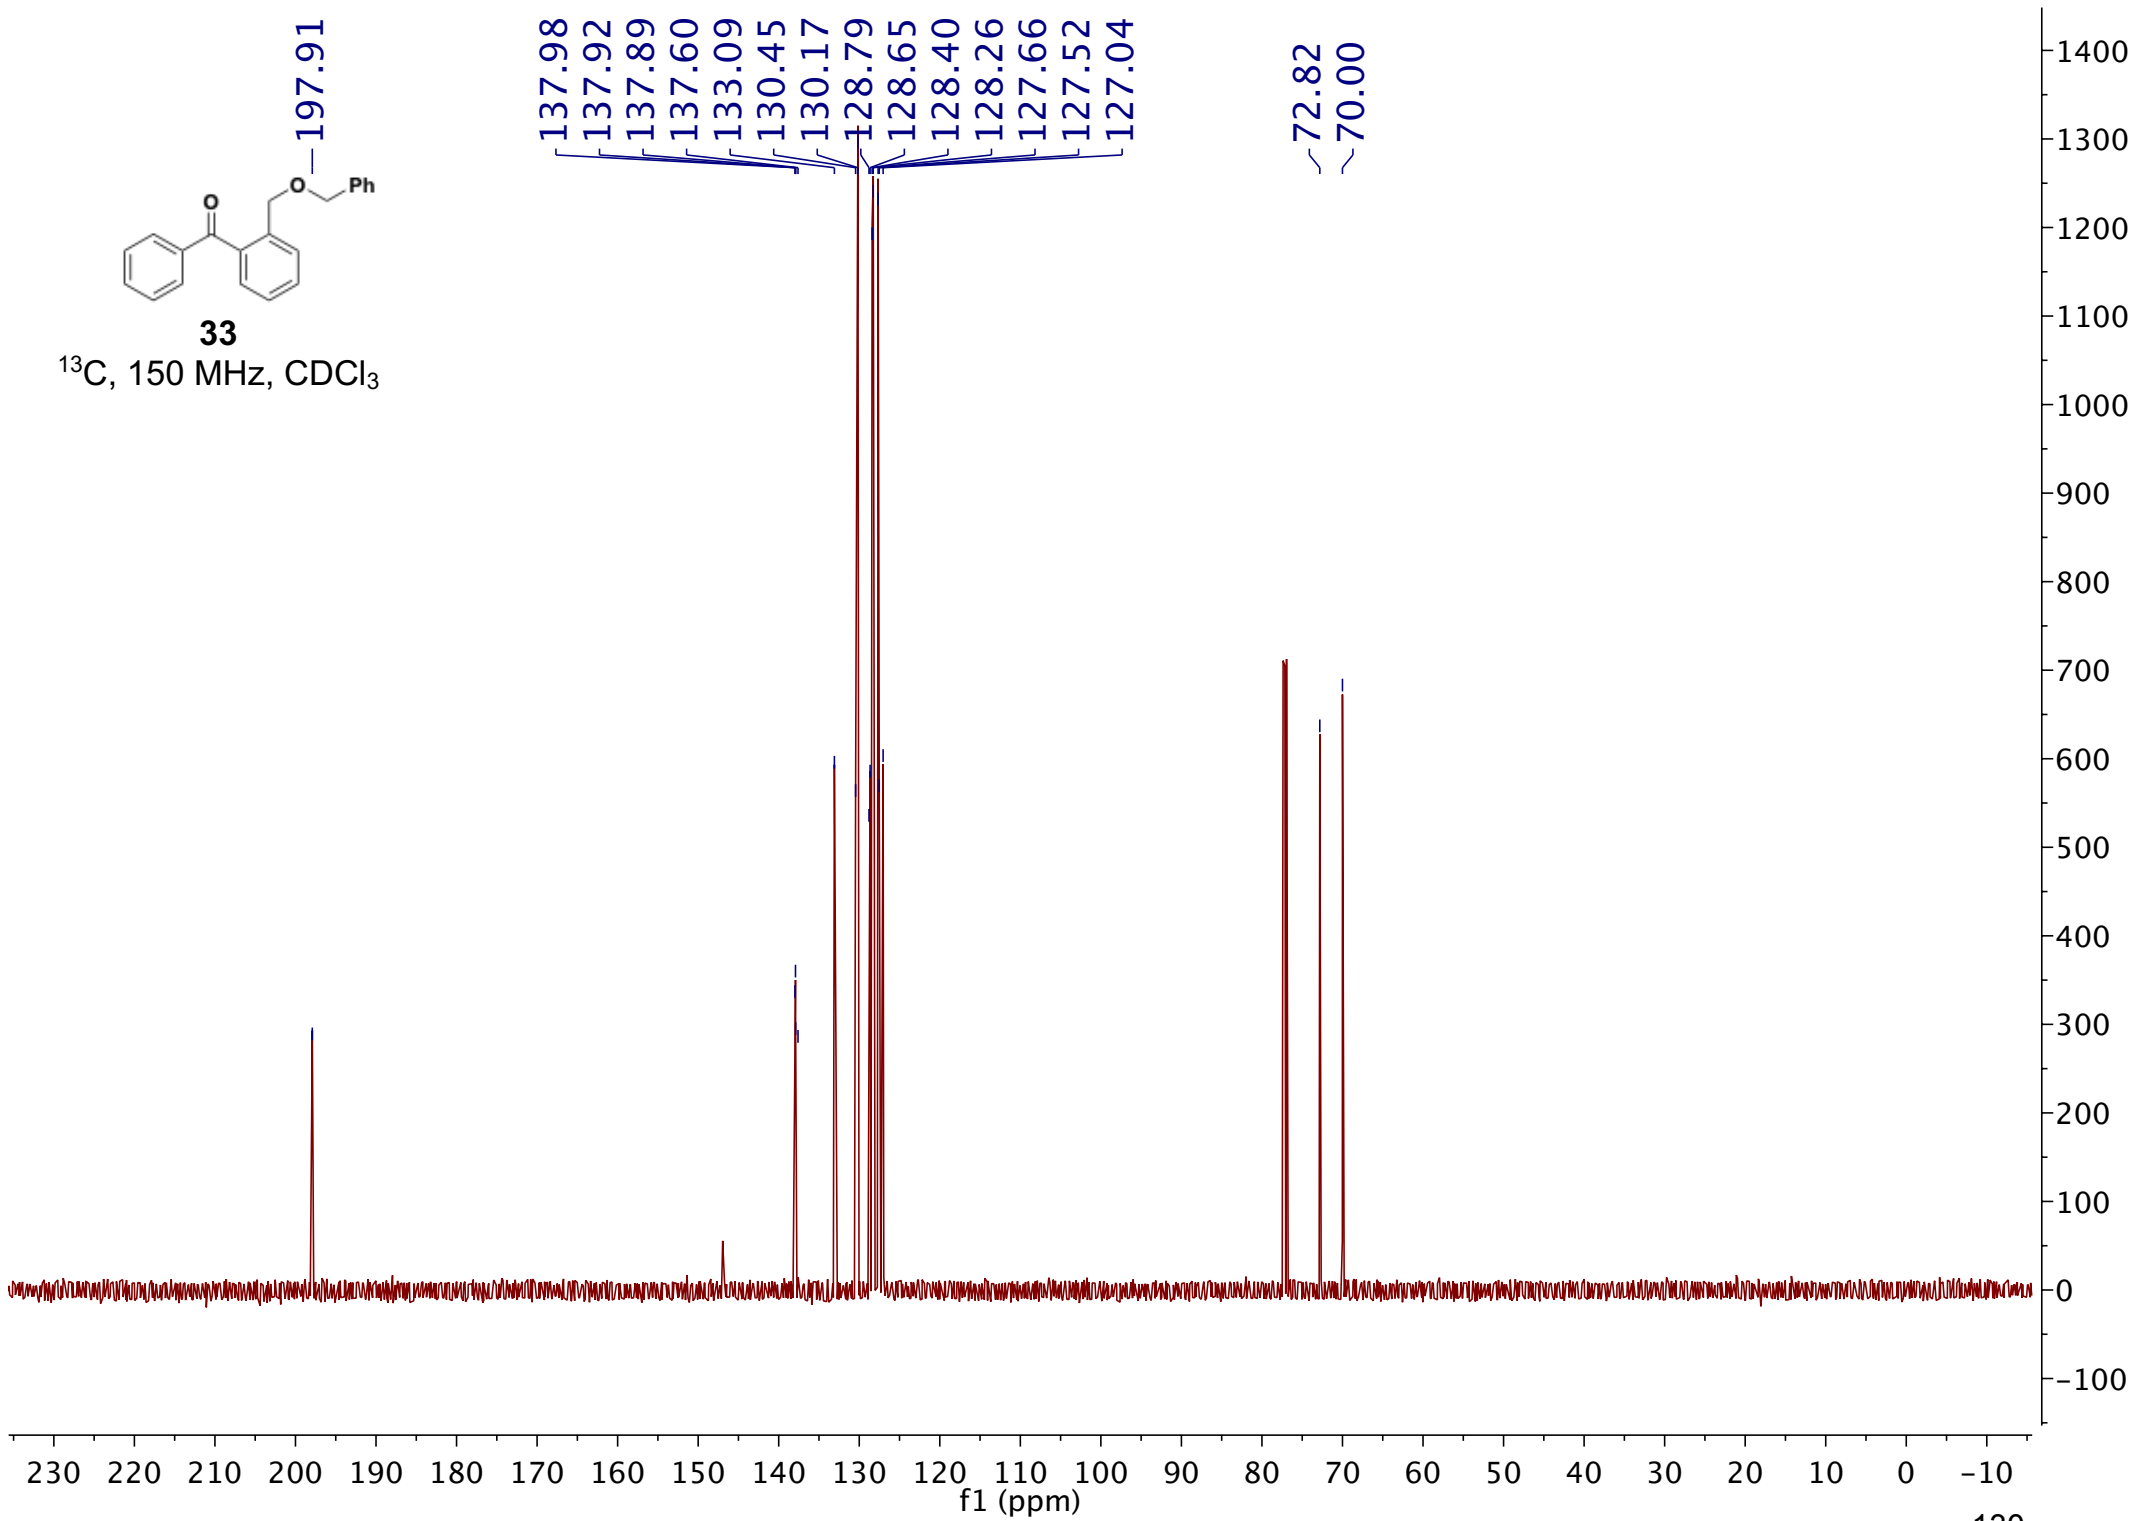



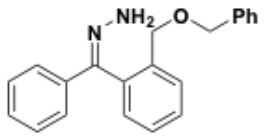

**10a-1**

<sup>1</sup>H, 600 MHz, CDCl<sub>3</sub>

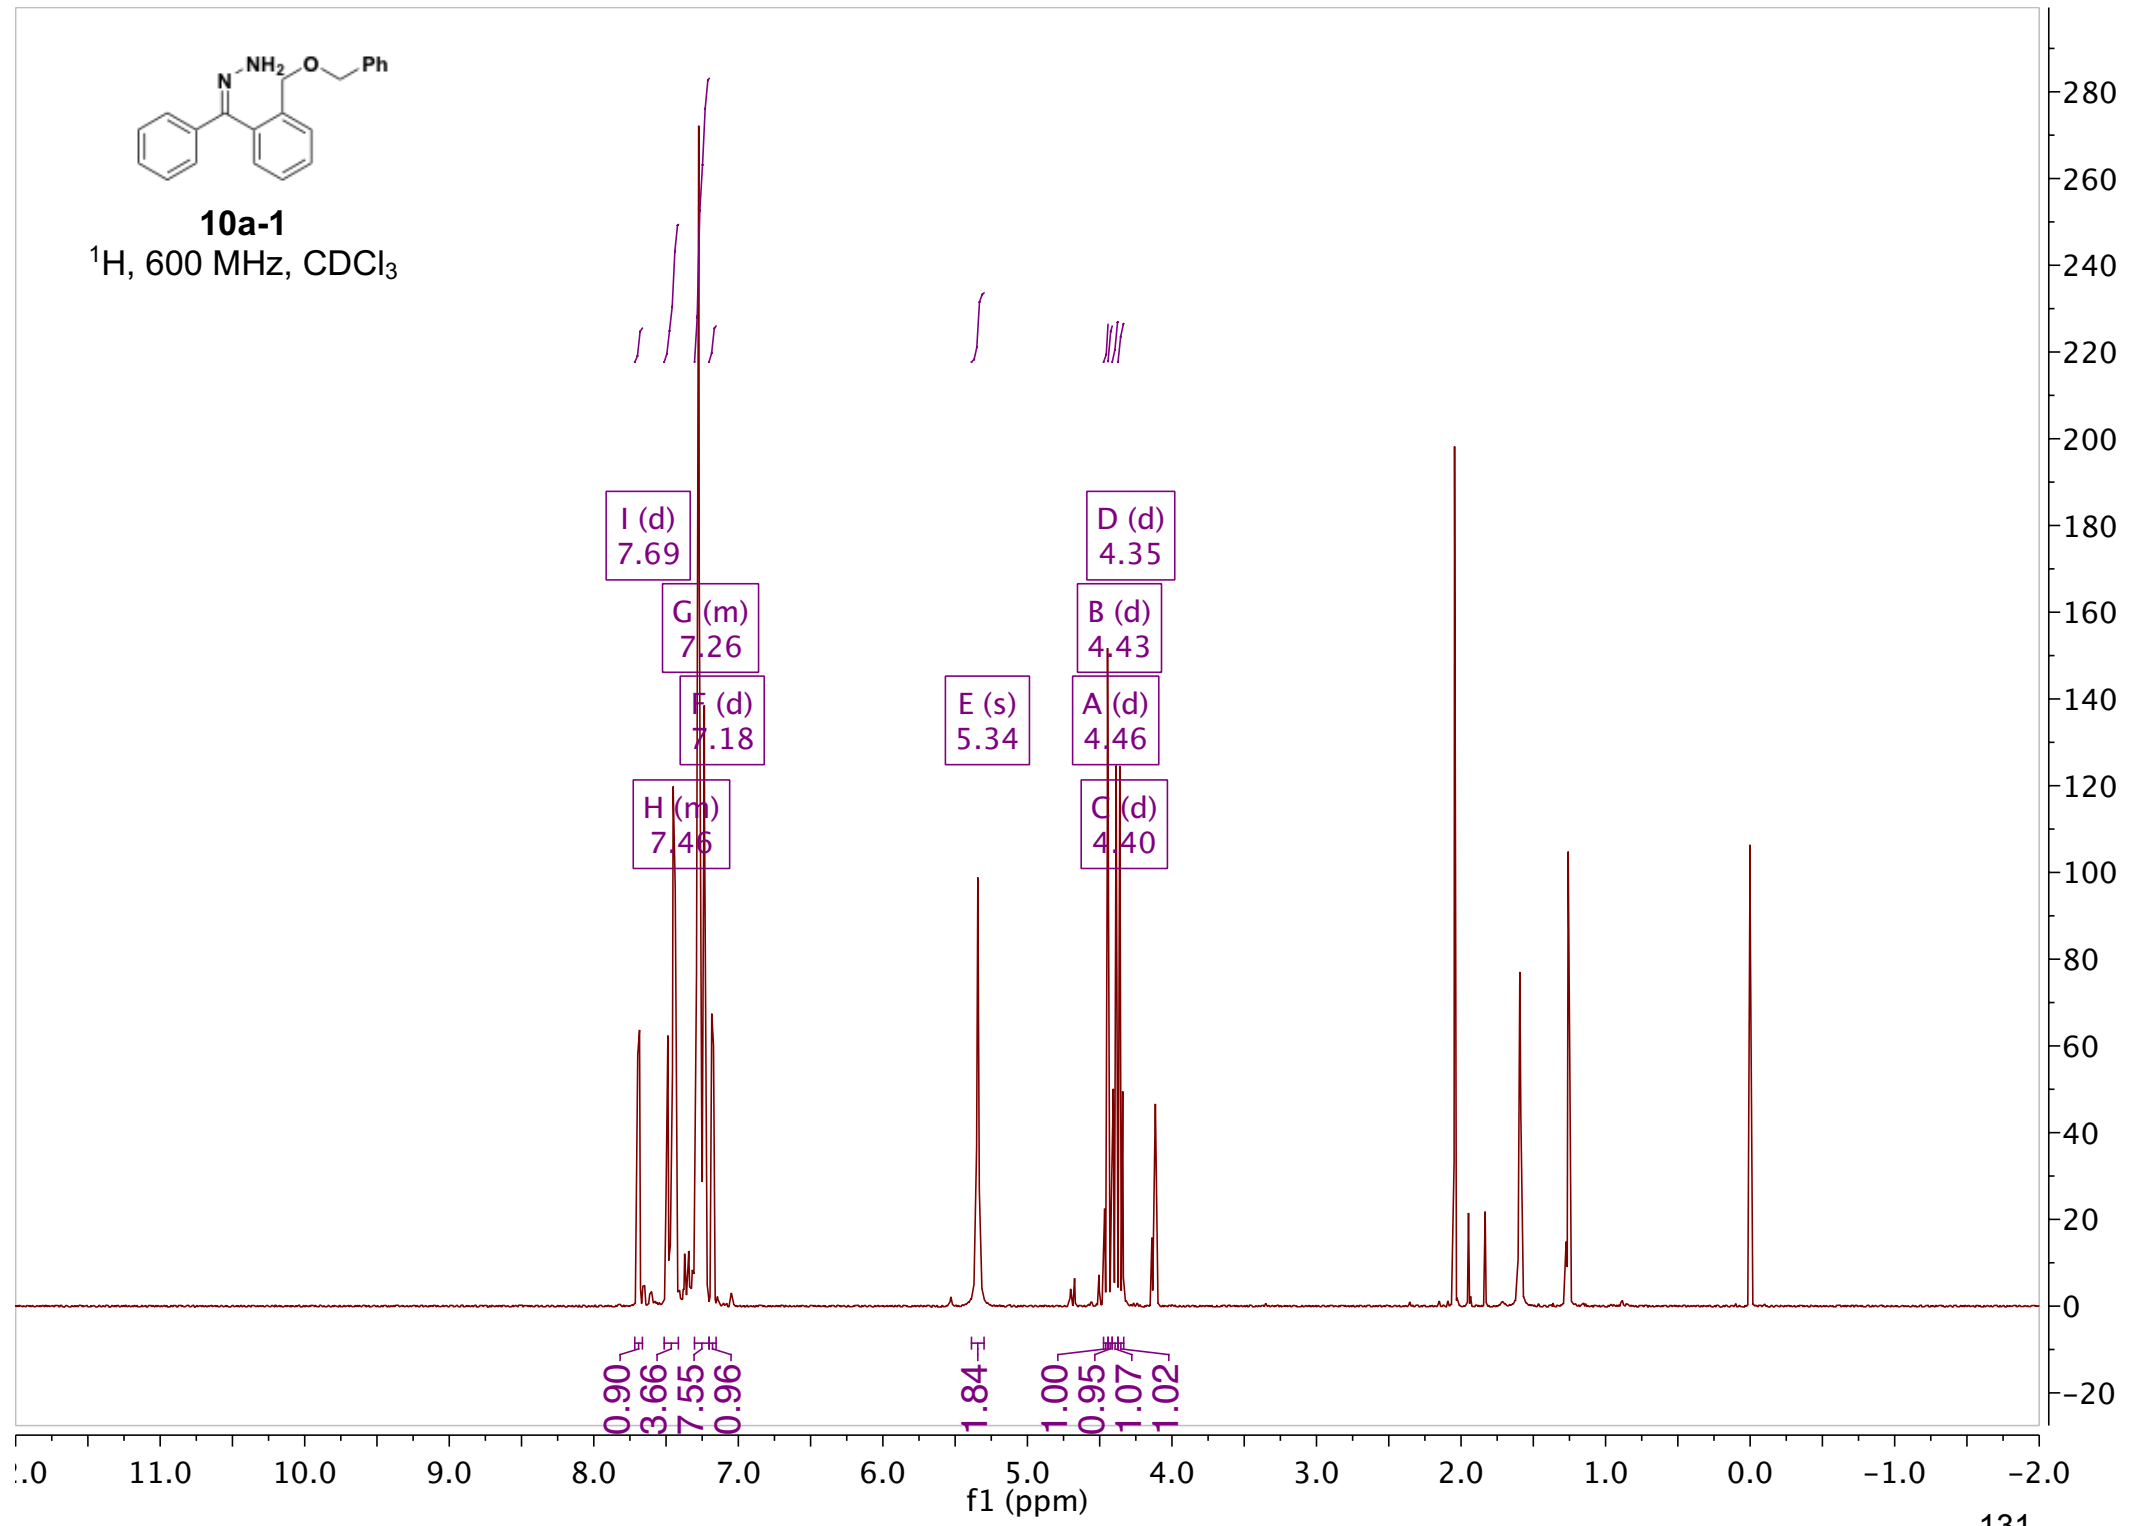

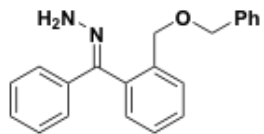

**10a-2**

$^1\text{H}$ , 600 MHz,  $\text{CDCl}_3$

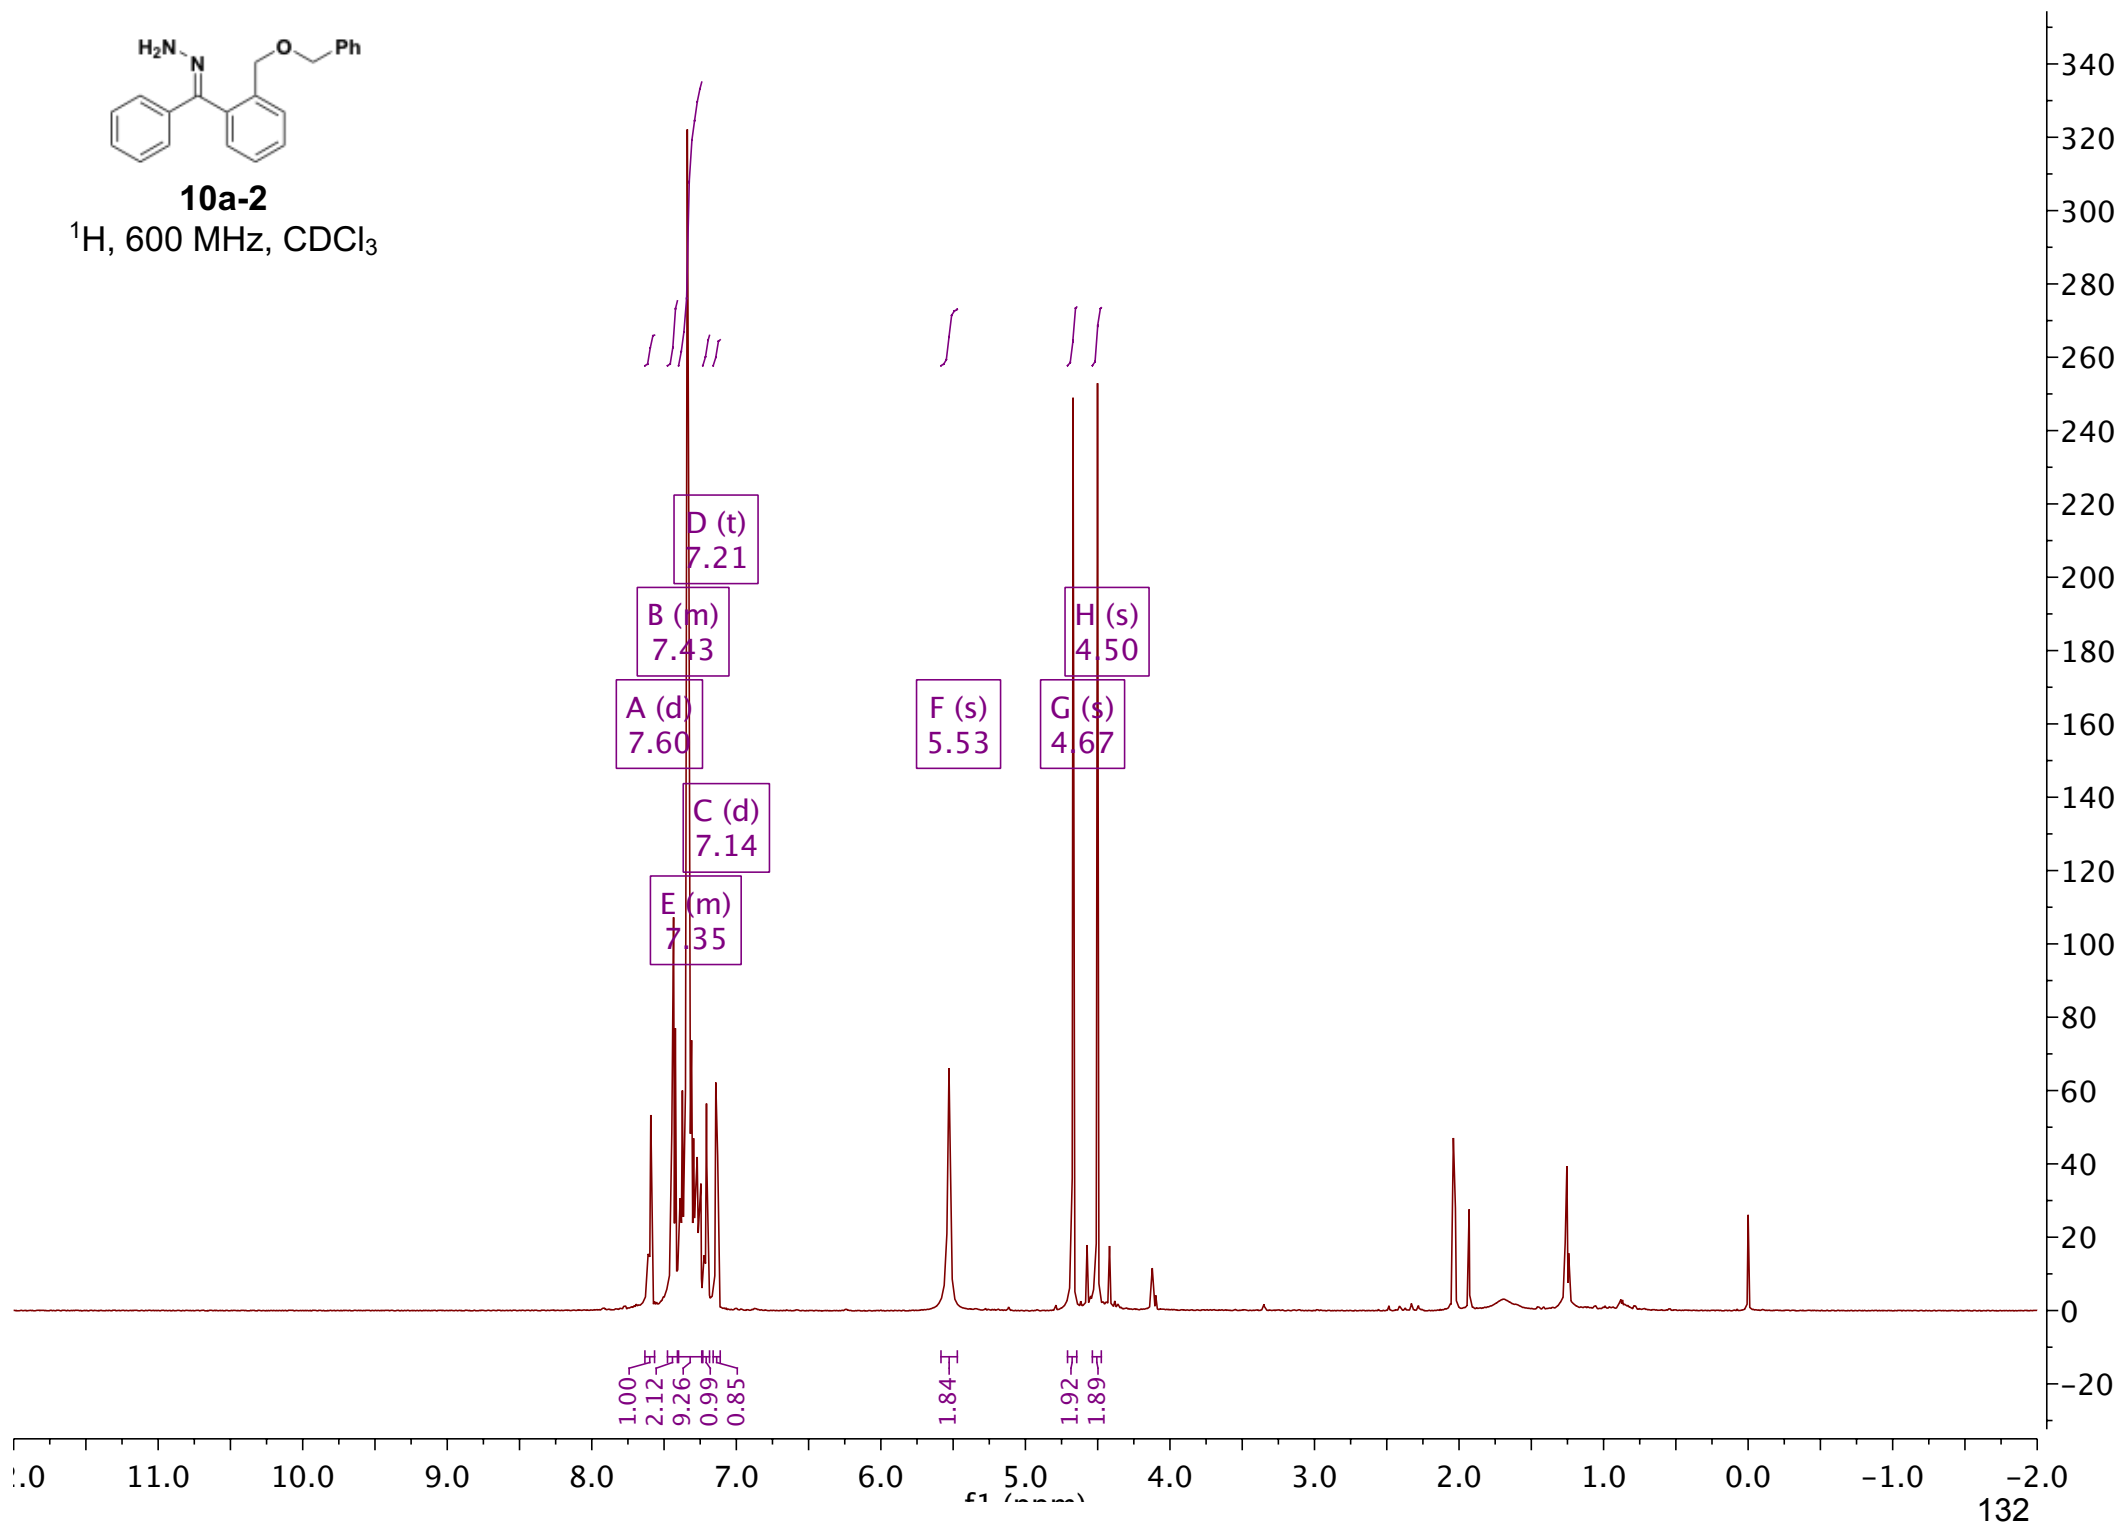

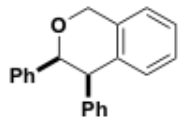

**11a**

$^1\text{H}$ , 600 MHz,  $\text{CDCl}_3$

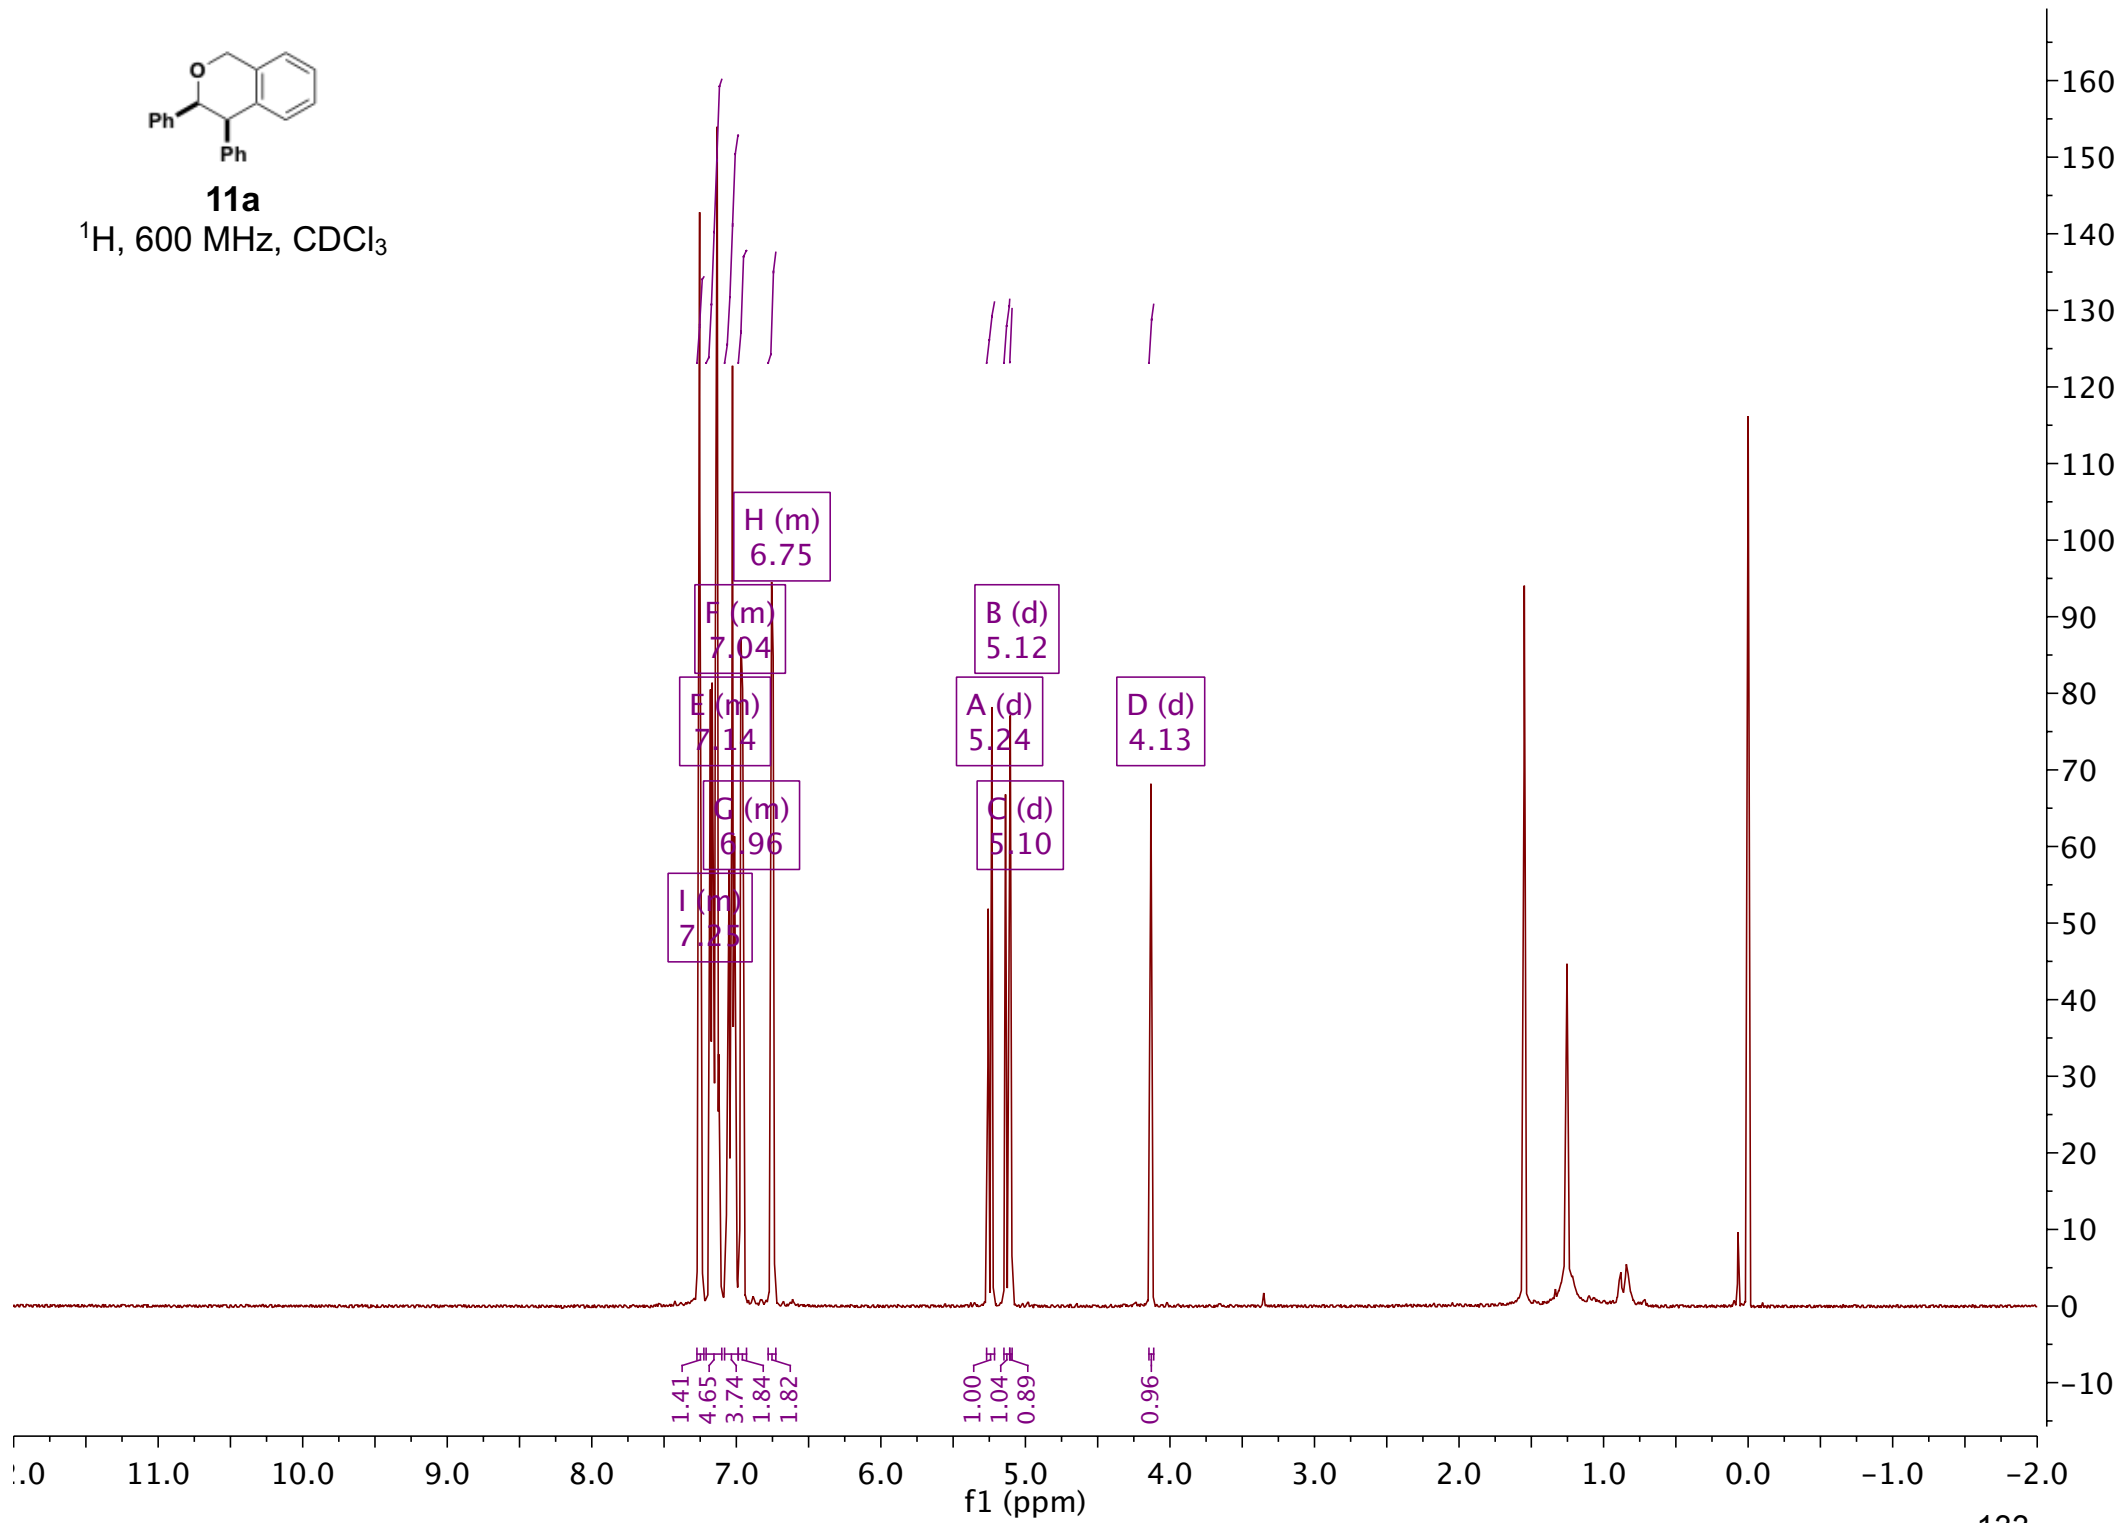

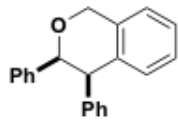

**11a**

$^{13}\text{C}$ , 150 MHz,  $\text{CDCl}_3$

140.84  
140.32  
137.26  
134.33  
130.38  
130.22  
127.75  
127.38  
127.01  
126.98  
126.76  
126.21  
126.05  
124.18

80.13  
69.23  
50.39

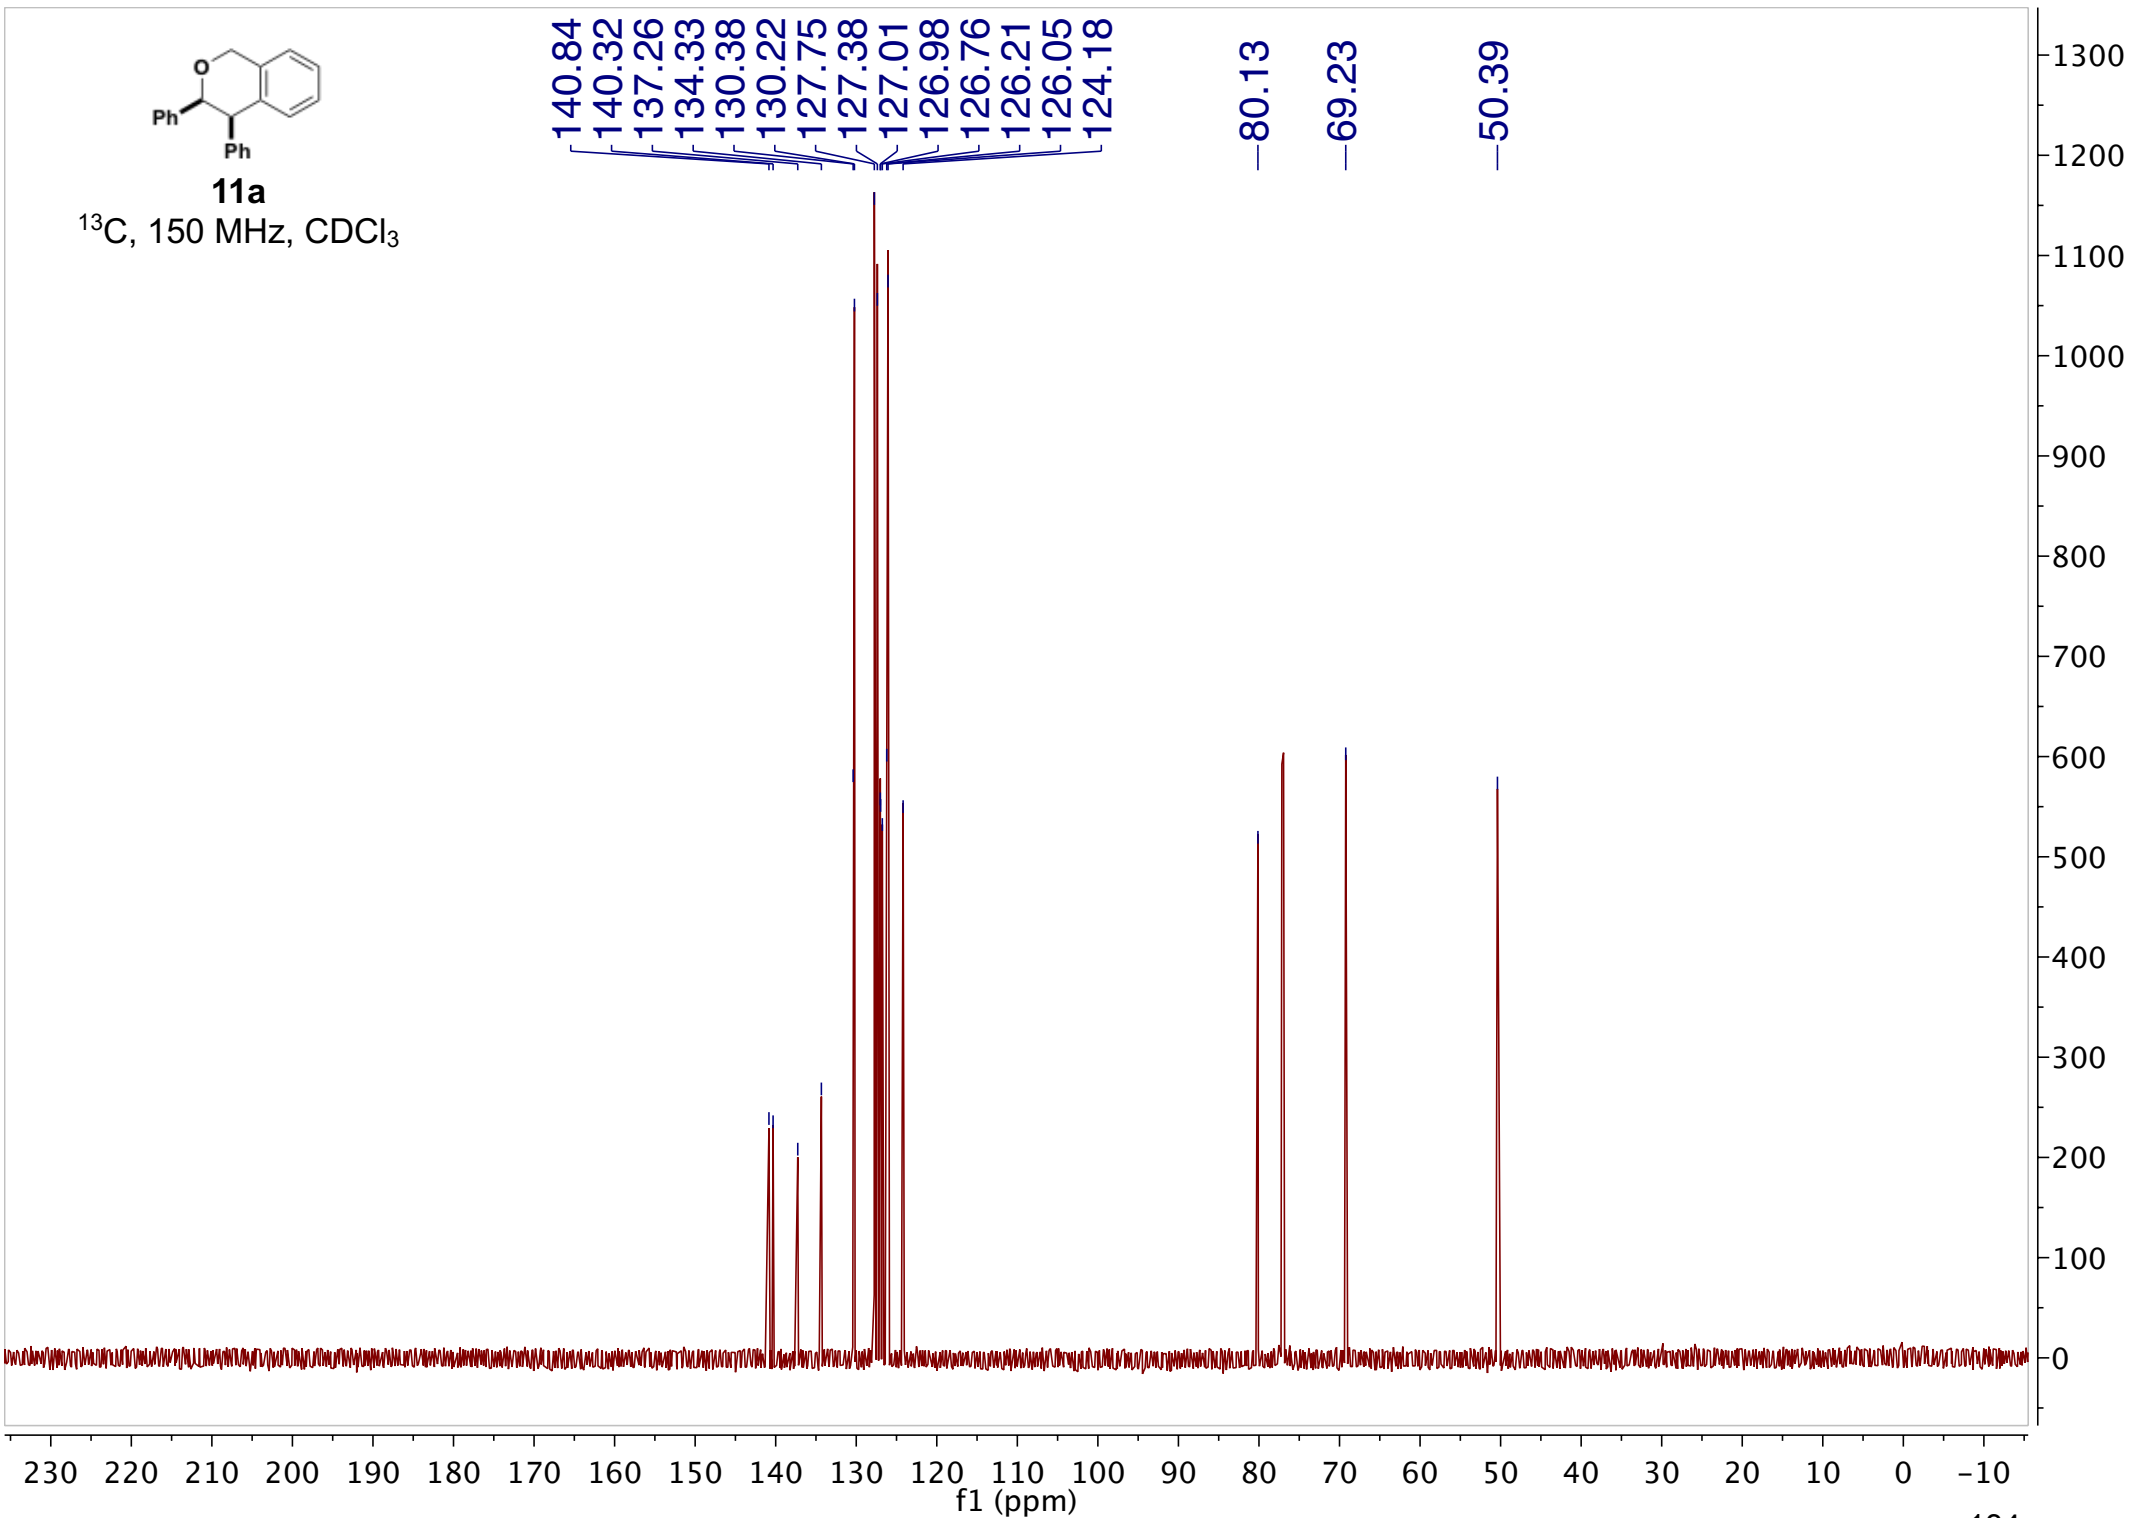

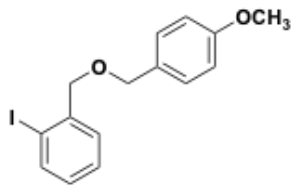

**34**

$^1\text{H}$ , 400 MHz,  $\text{CDCl}_3$

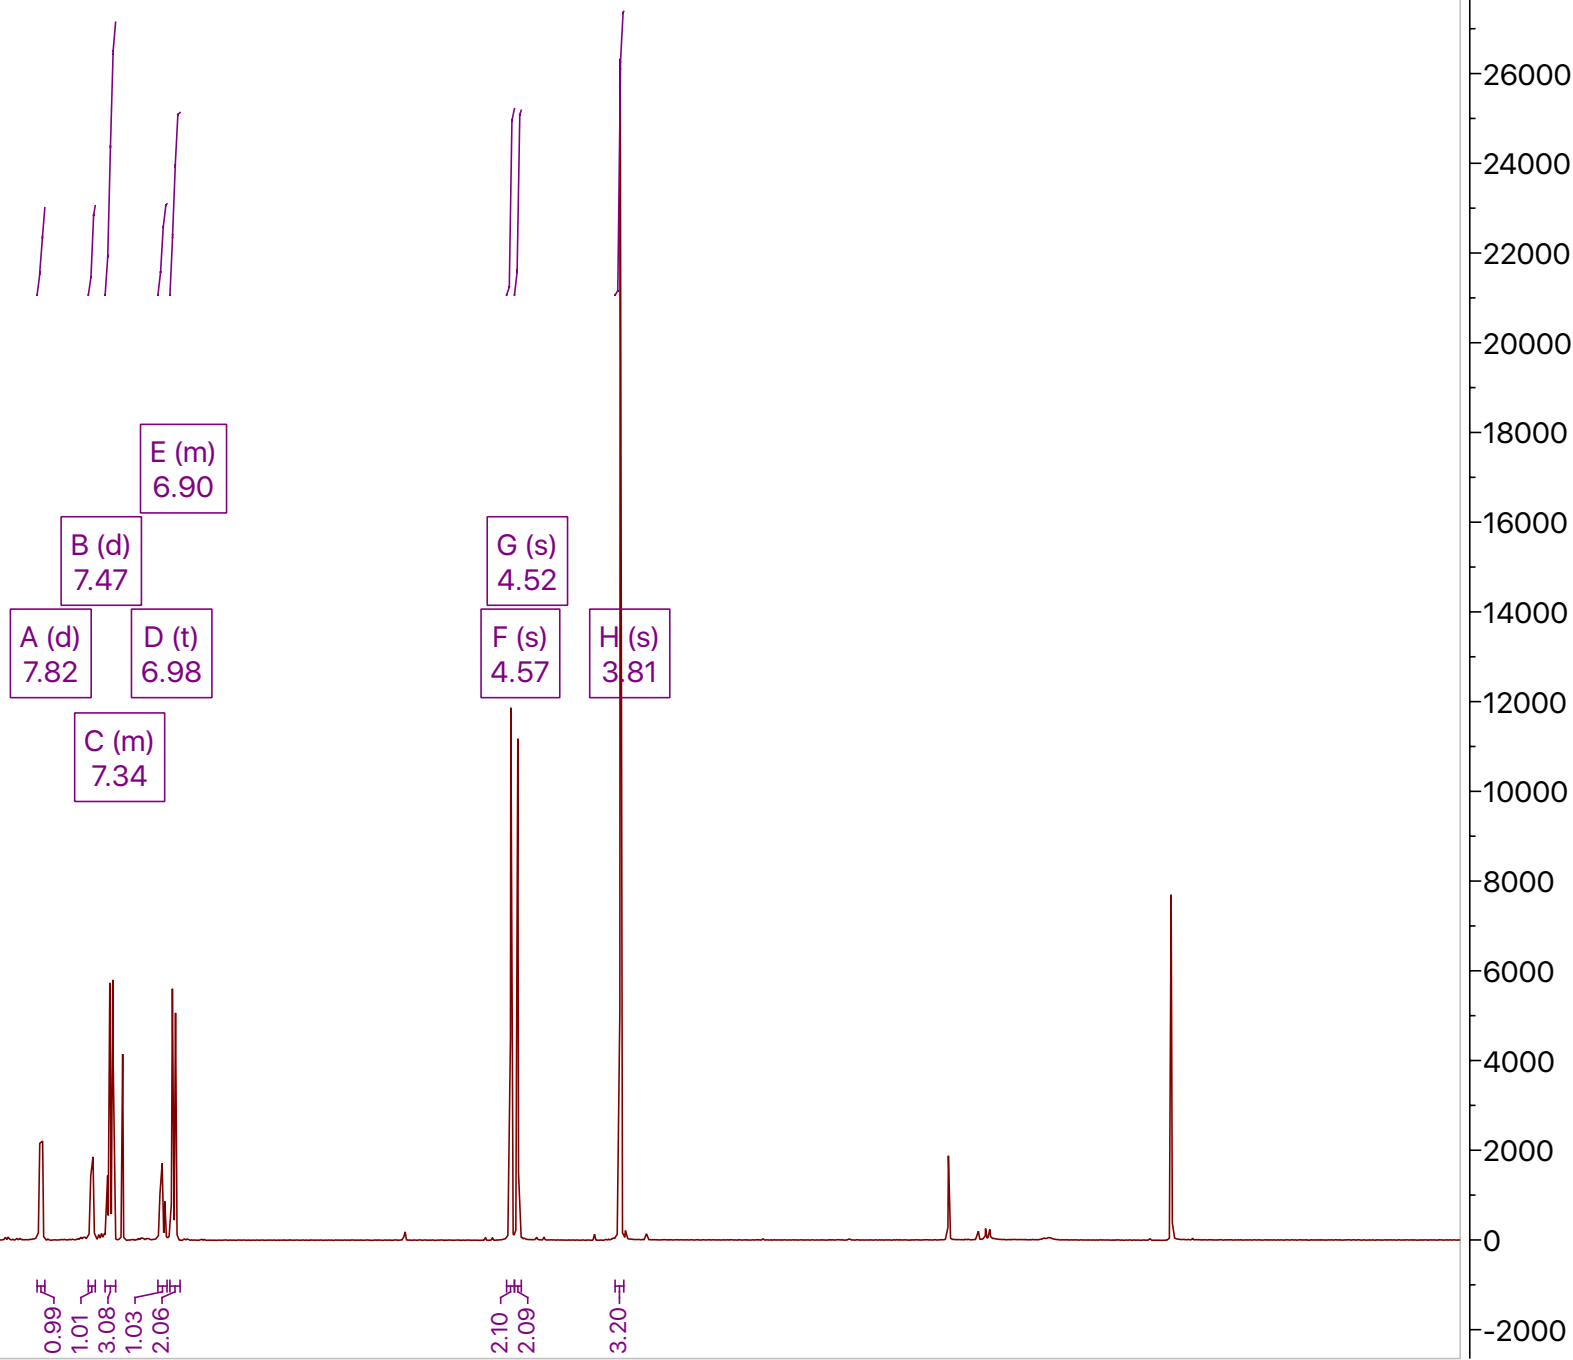

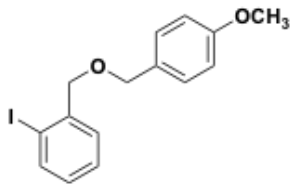

**34**

$^{13}\text{C}$ , 100 MHz,  $\text{CDCl}_3$

158.95

140.39

138.77

129.82

129.11

128.85

128.56

127.91

113.54

97.73

75.48

72.11

54.88

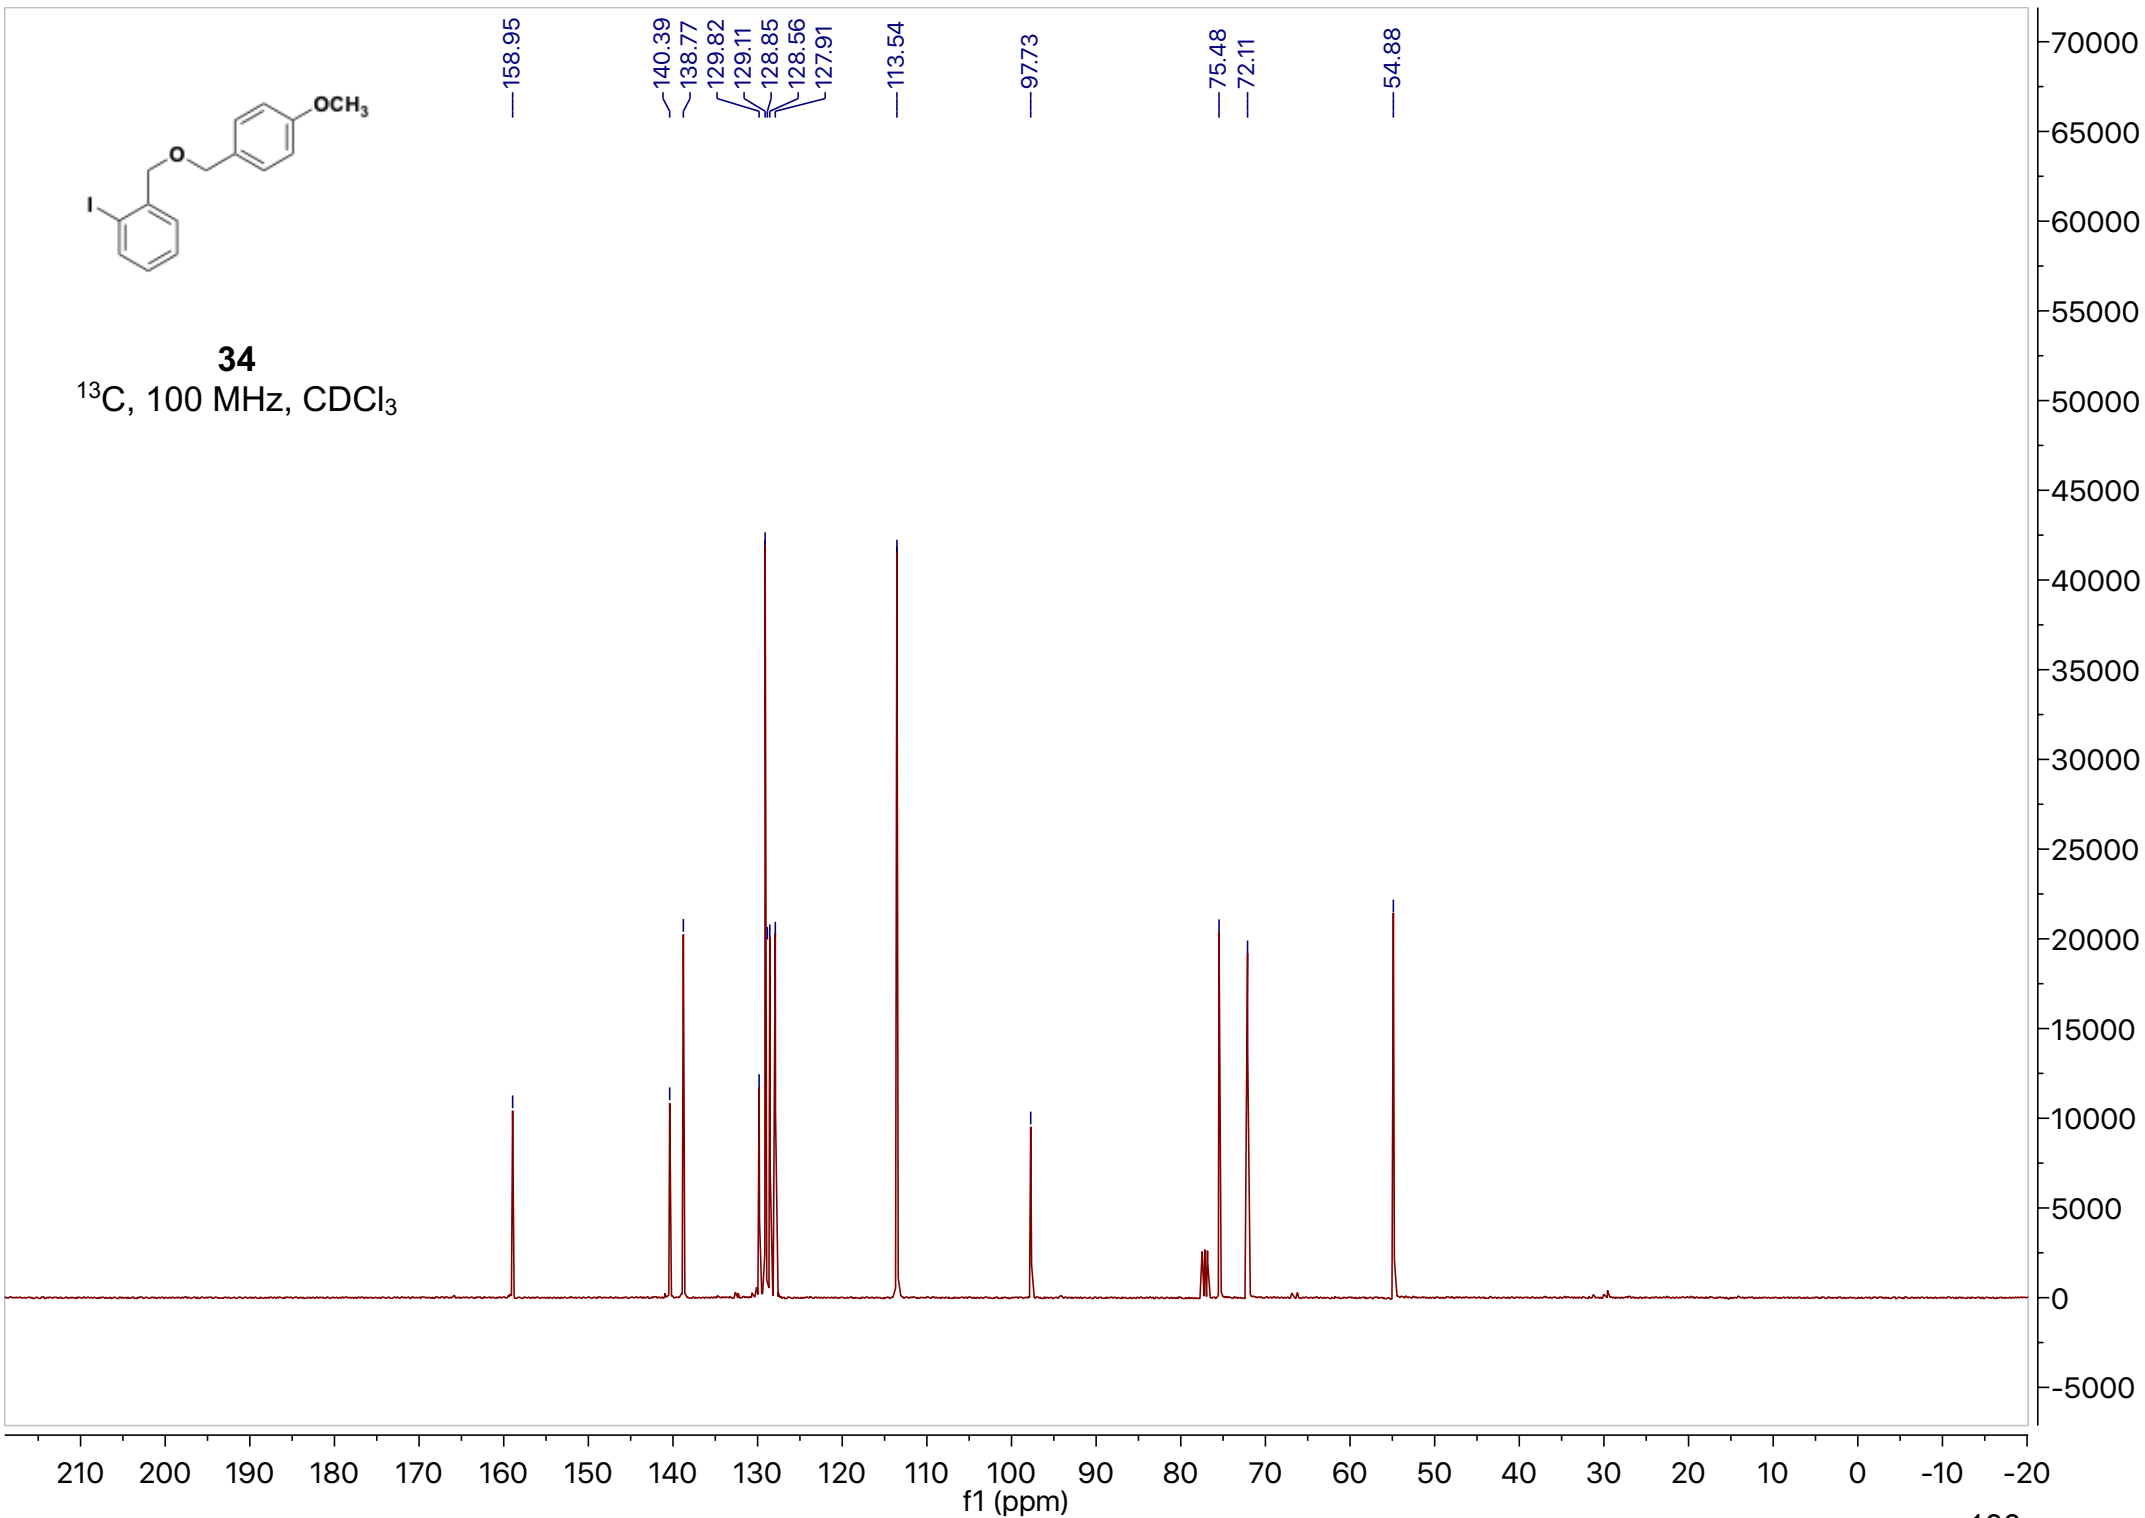

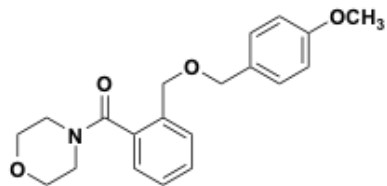

**35**

$^1\text{H}$ , 600 MHz,  $\text{CDCl}_3$

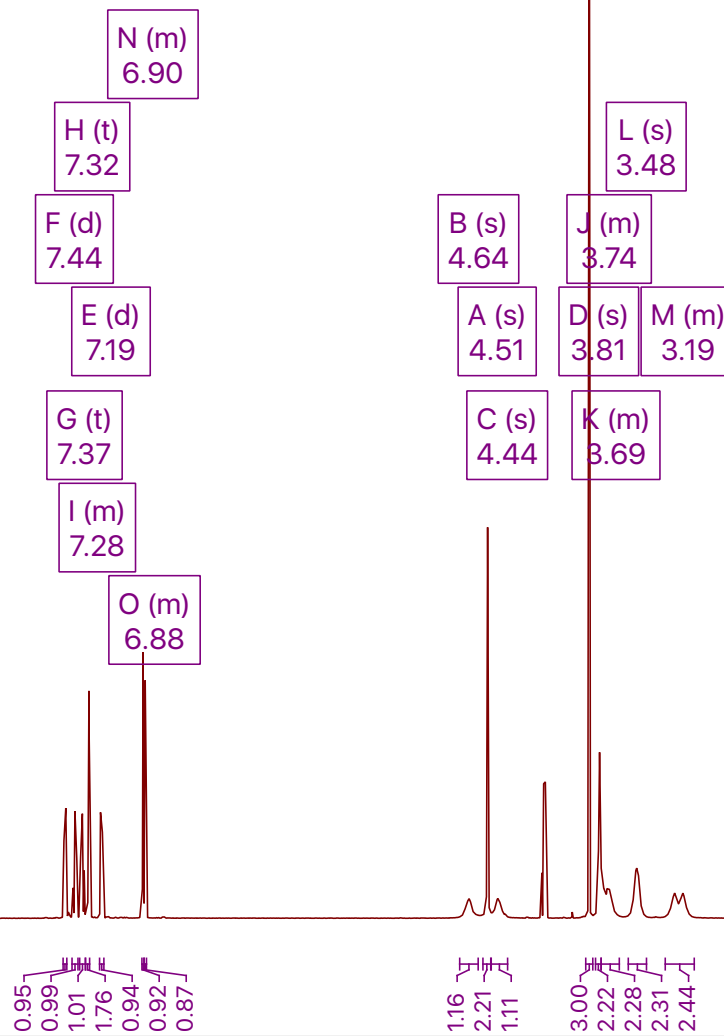

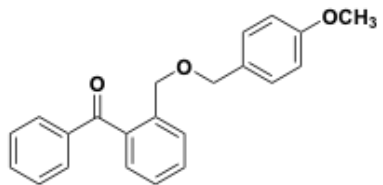

**36**

<sup>1</sup>H, 600 MHz, CDCl<sub>3</sub>

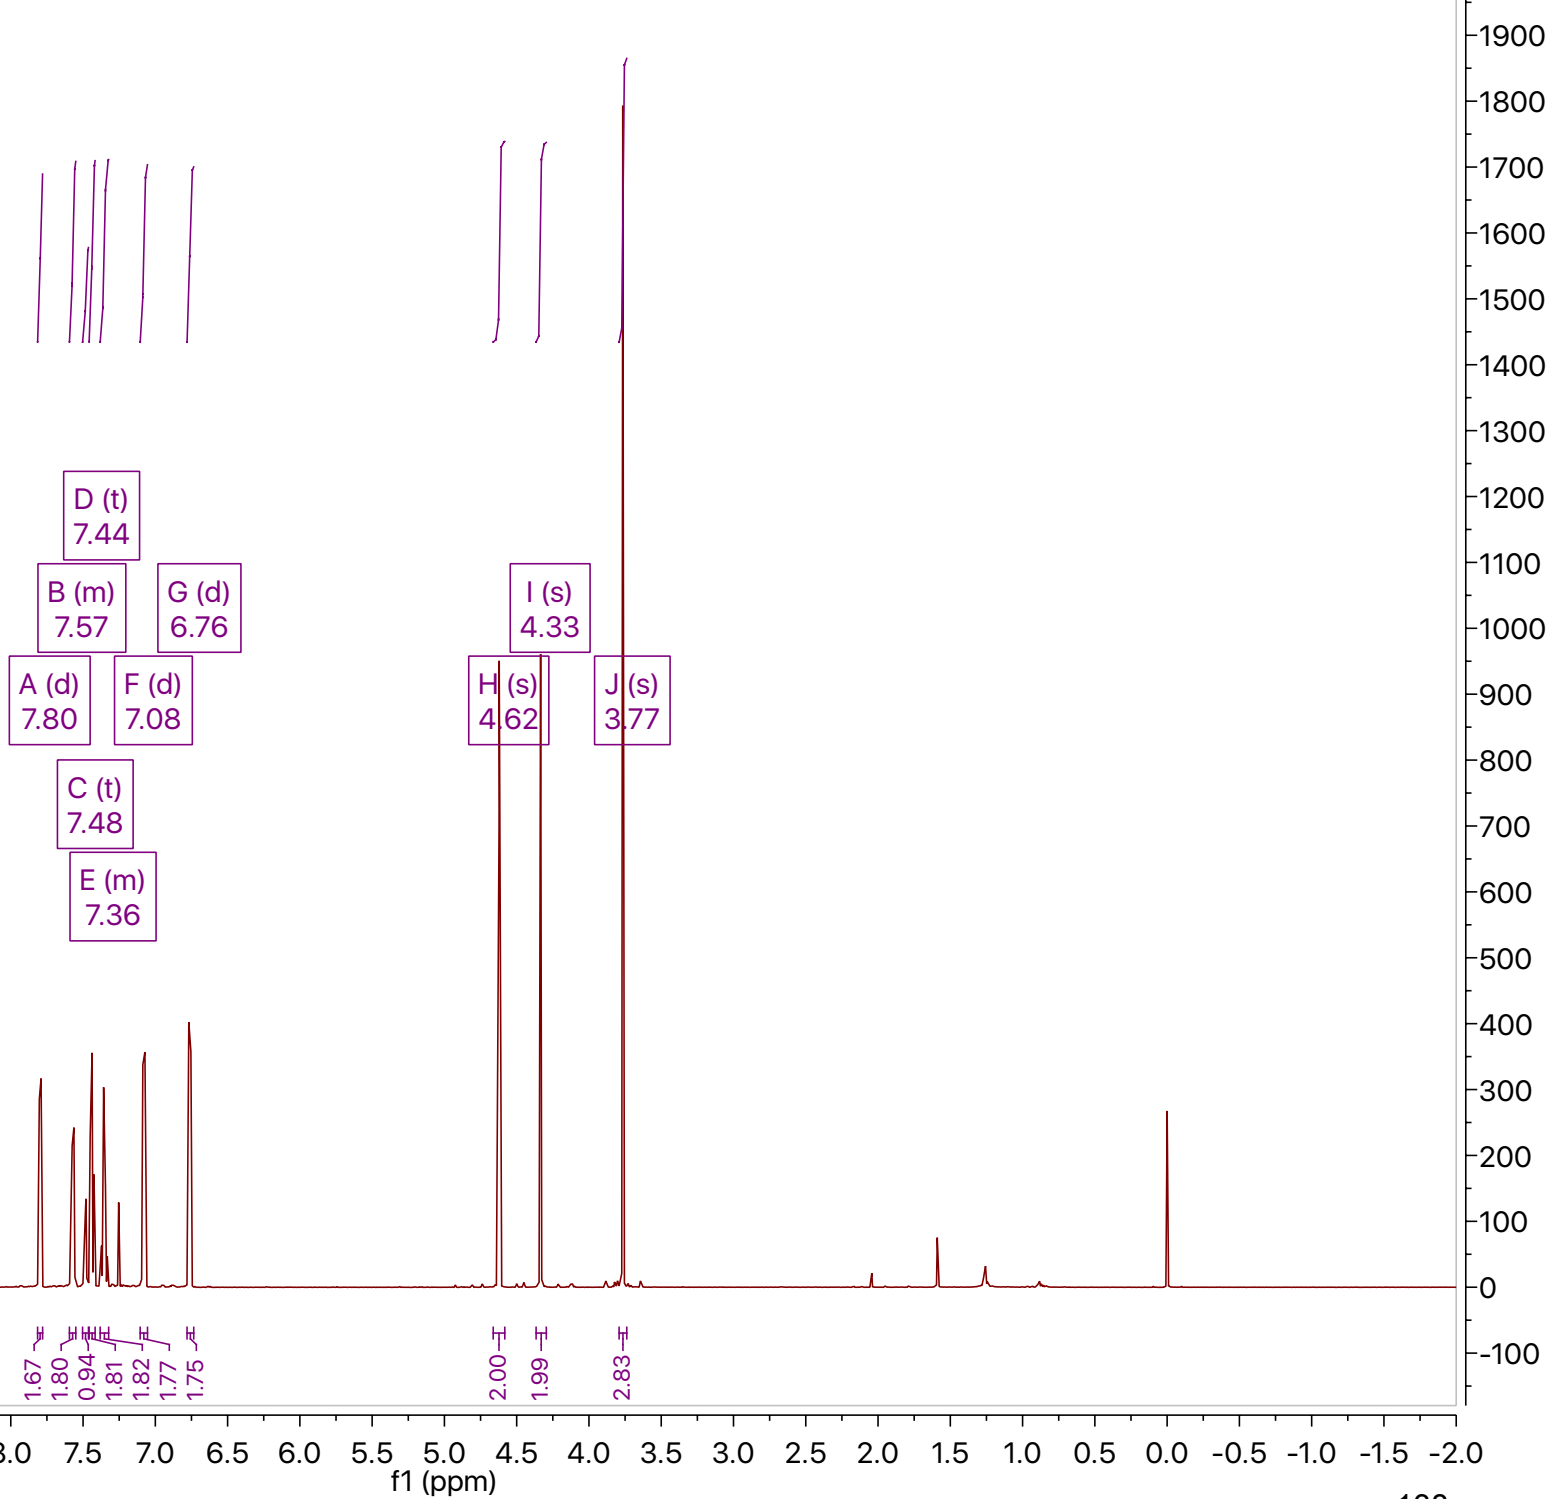



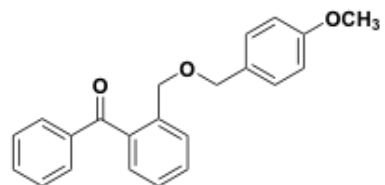

**36**

$^{13}\text{C}$ , 150 MHz,  $\text{CDCl}_3$

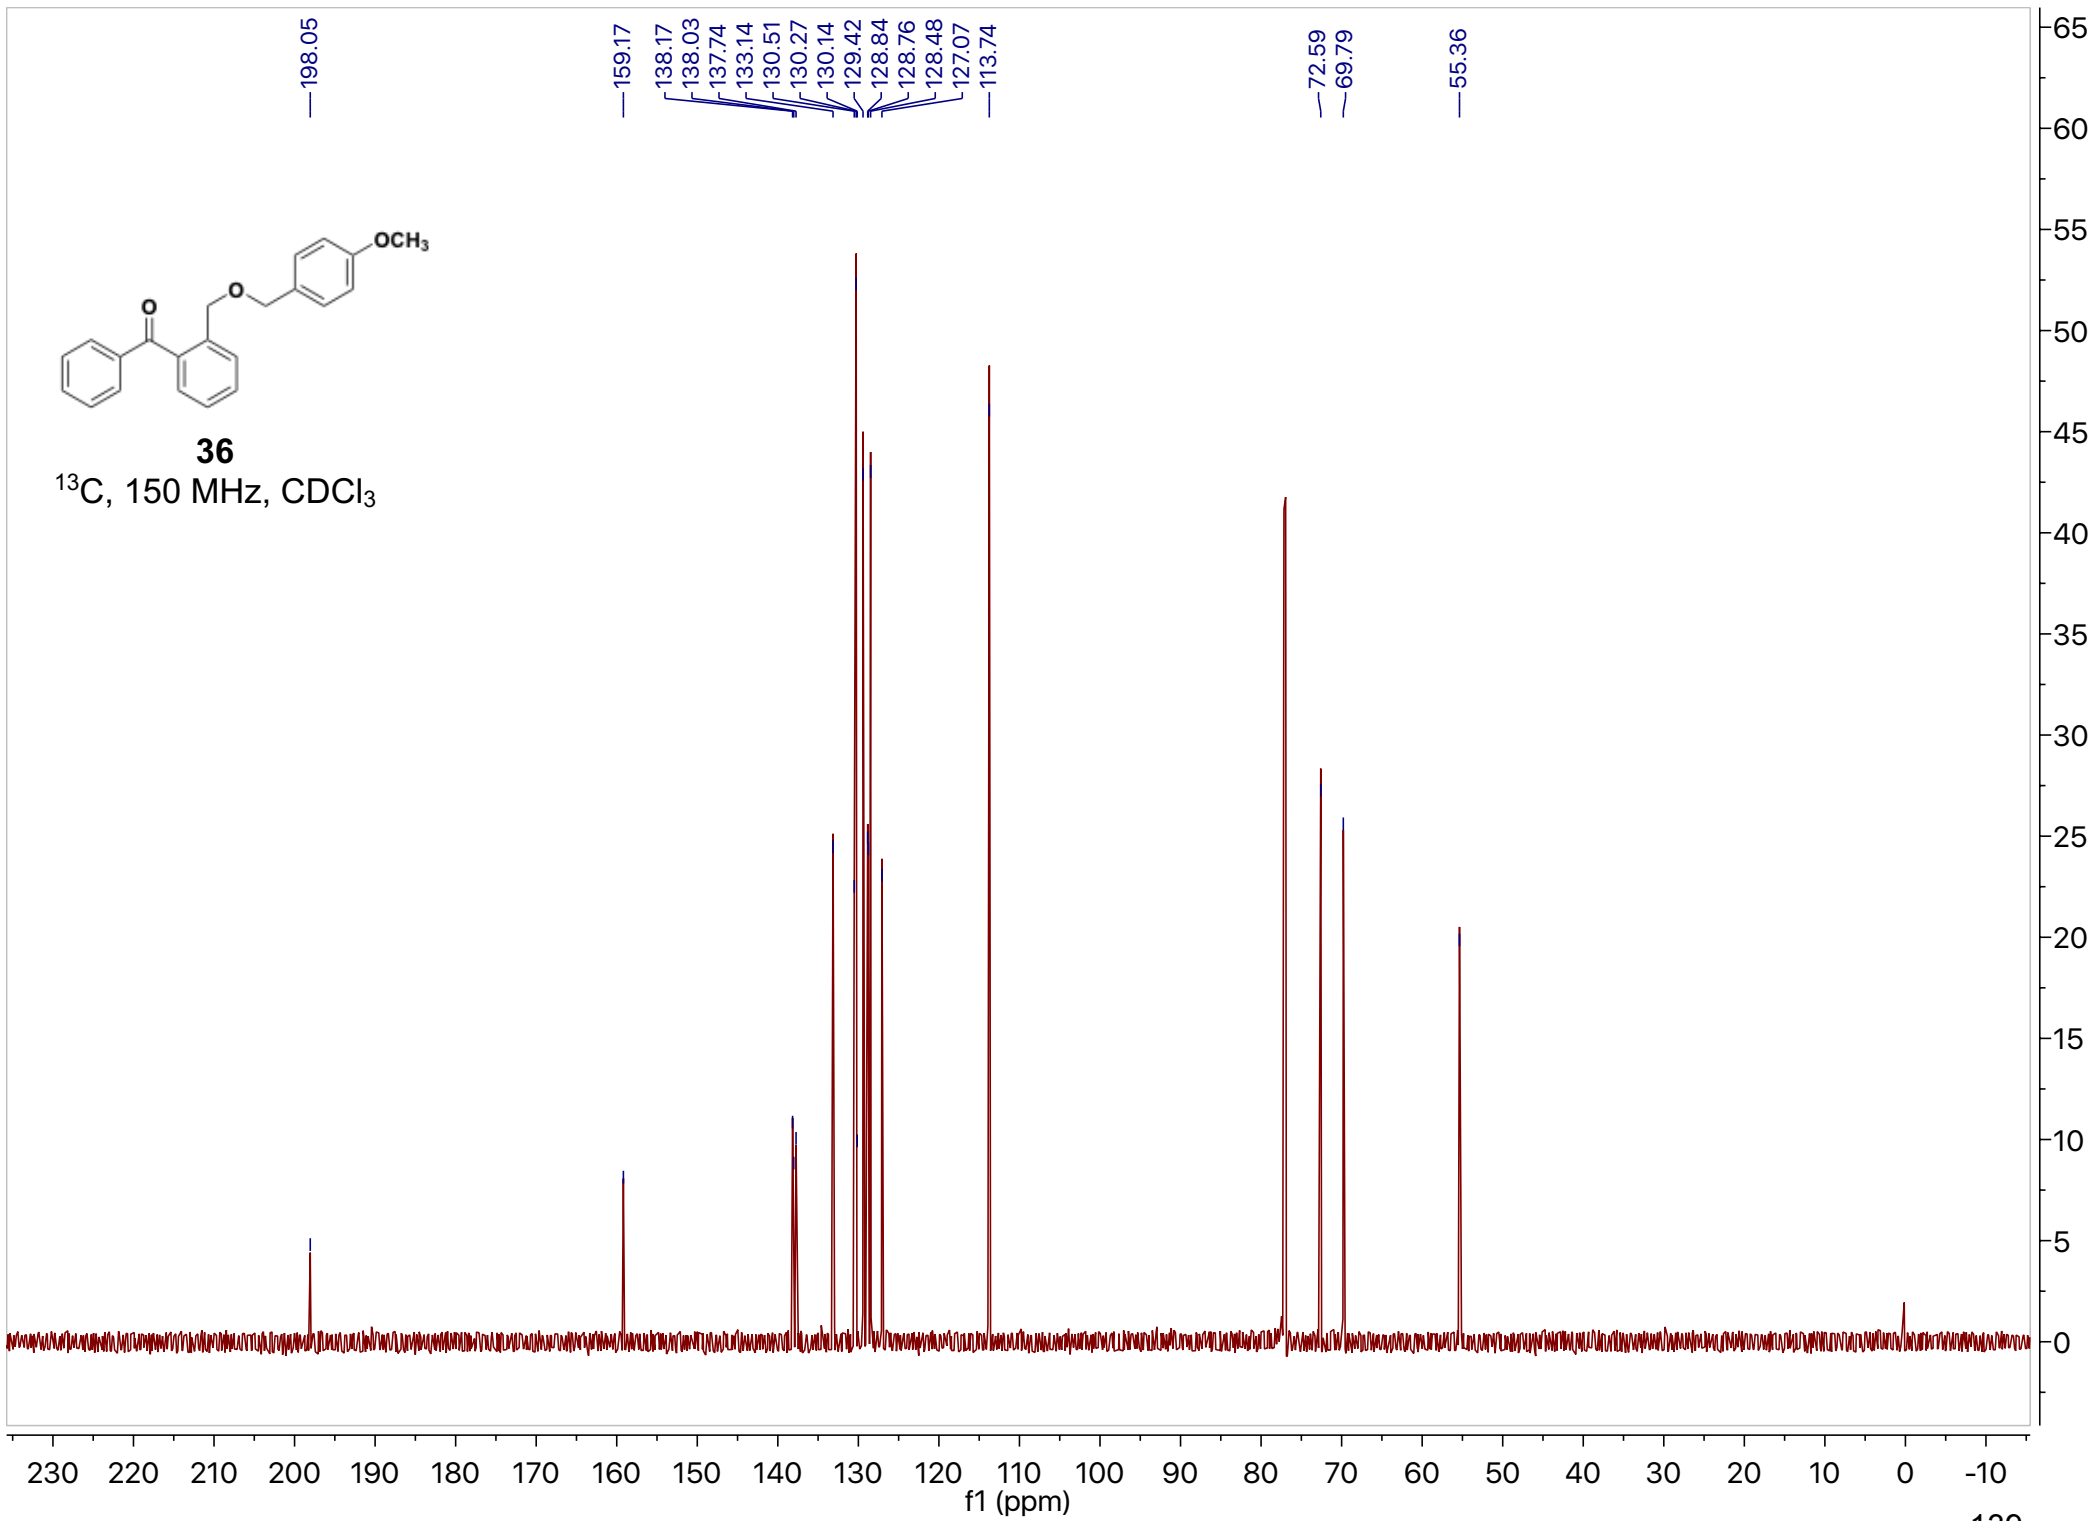

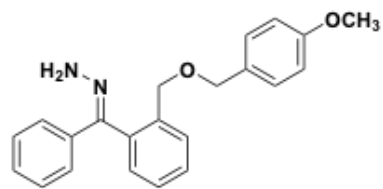

**10b**

$^1\text{H}$ , 400 MHz,  $\text{CDCl}_3$

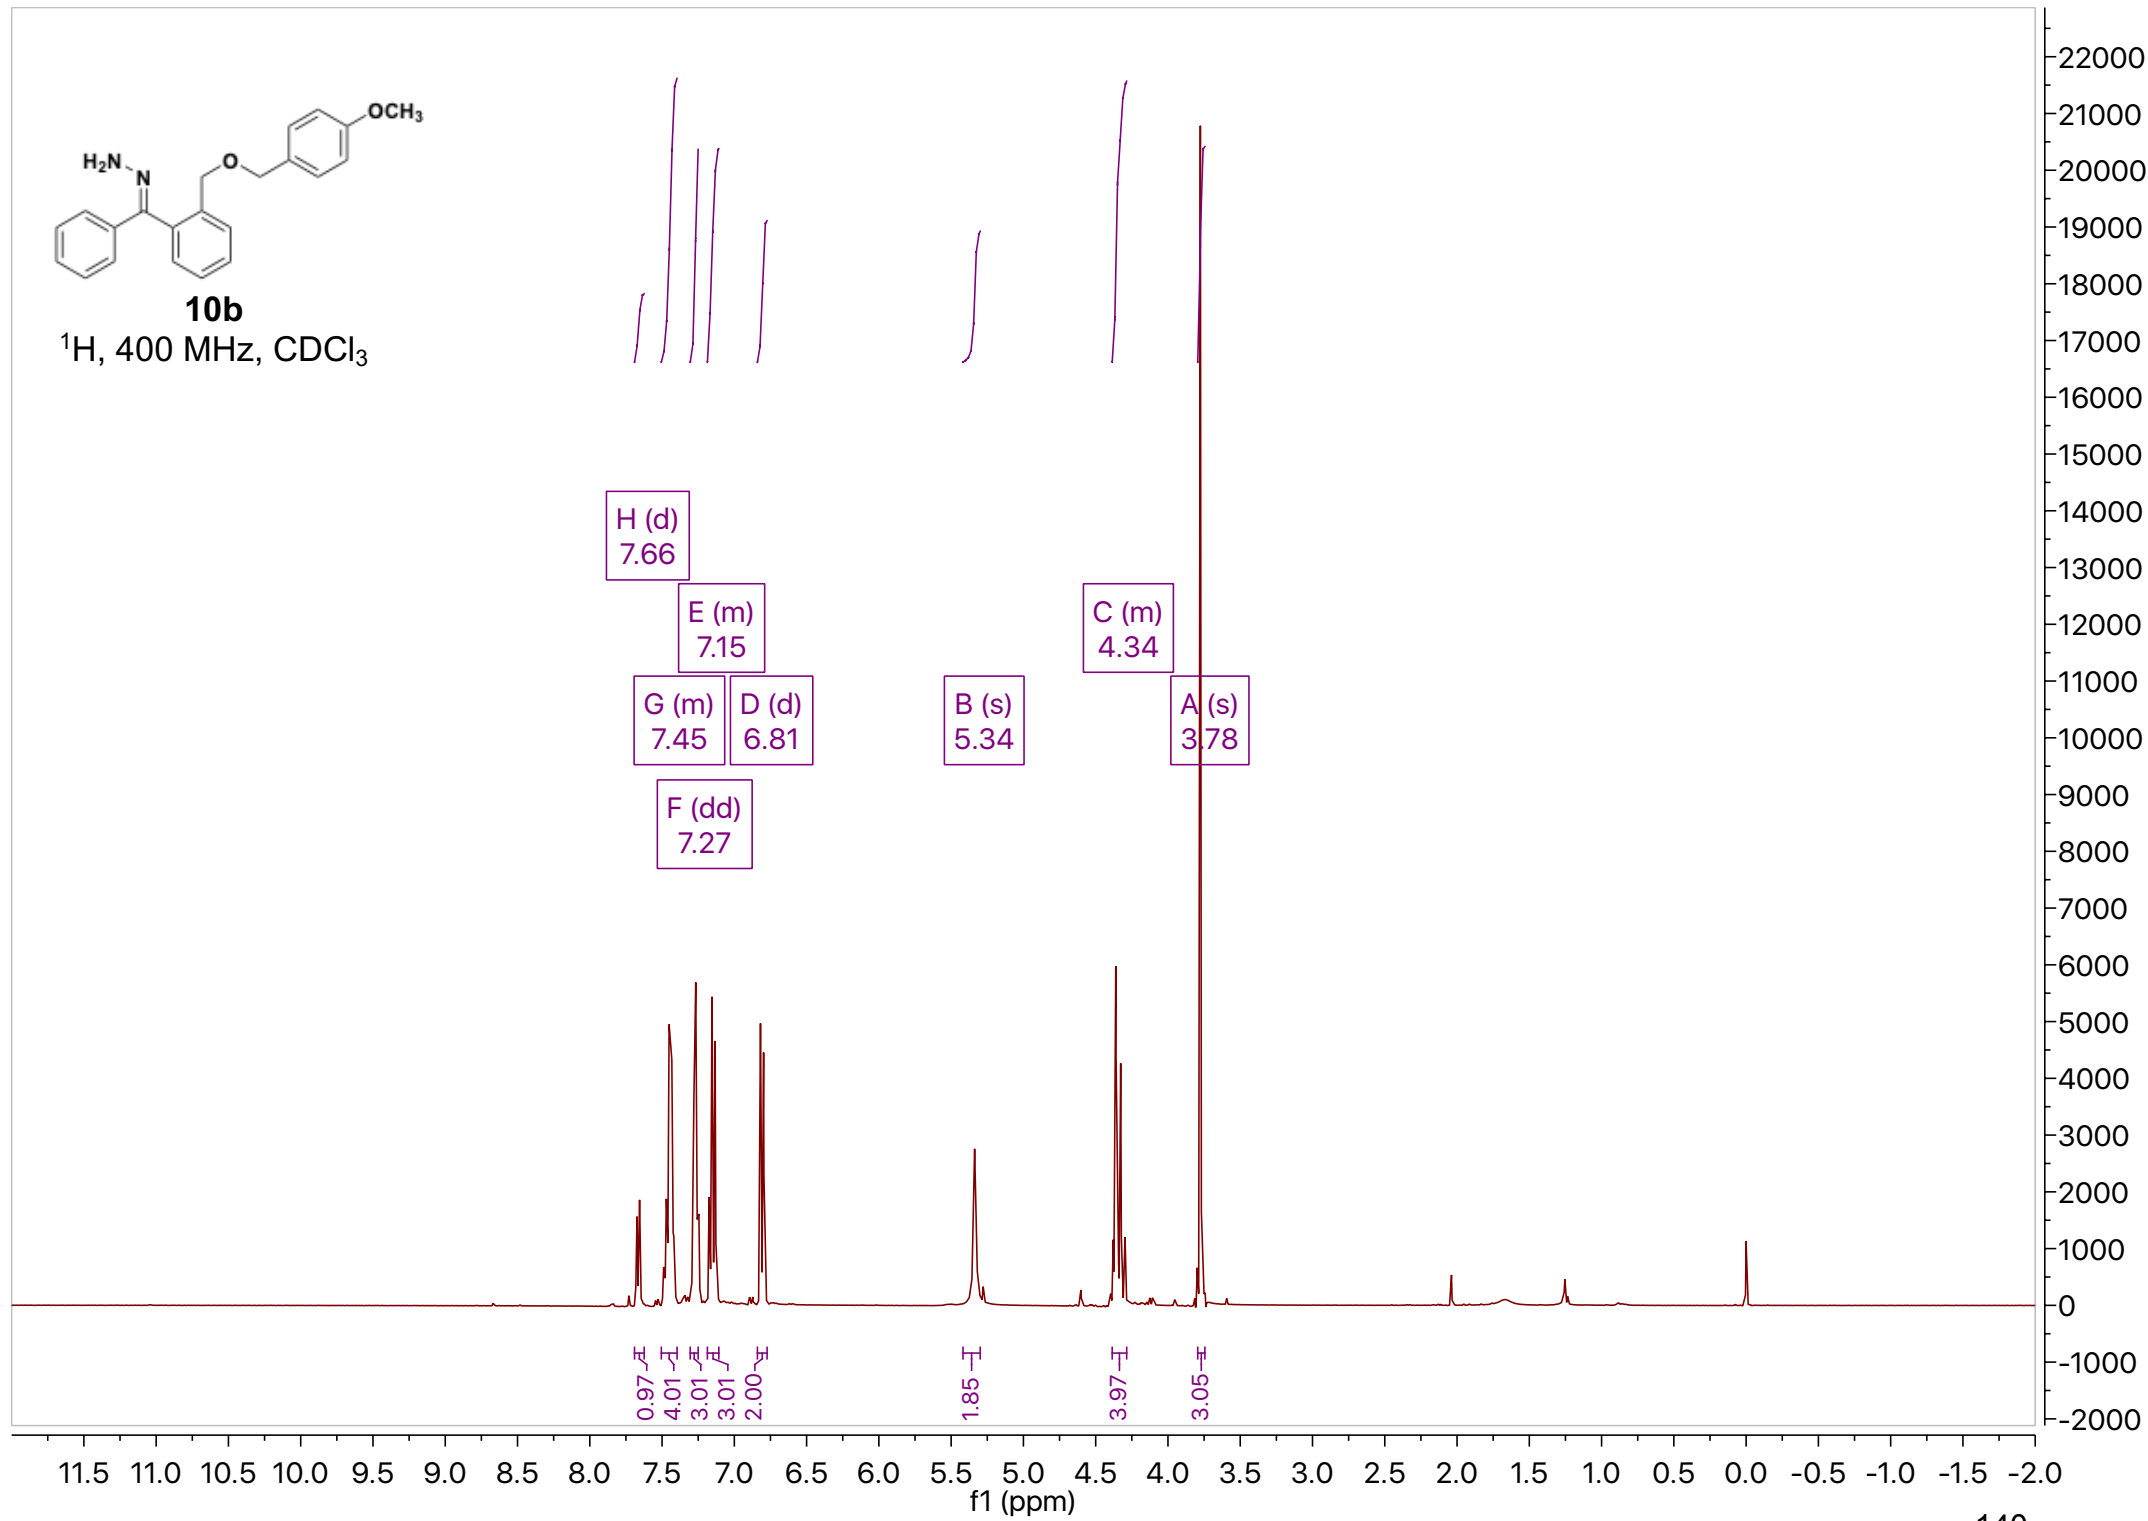

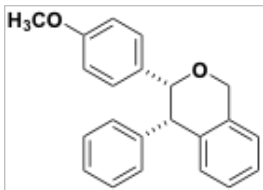

**11b**

$^1\text{H}$ , 400 MHz,  $\text{CDCl}_3$

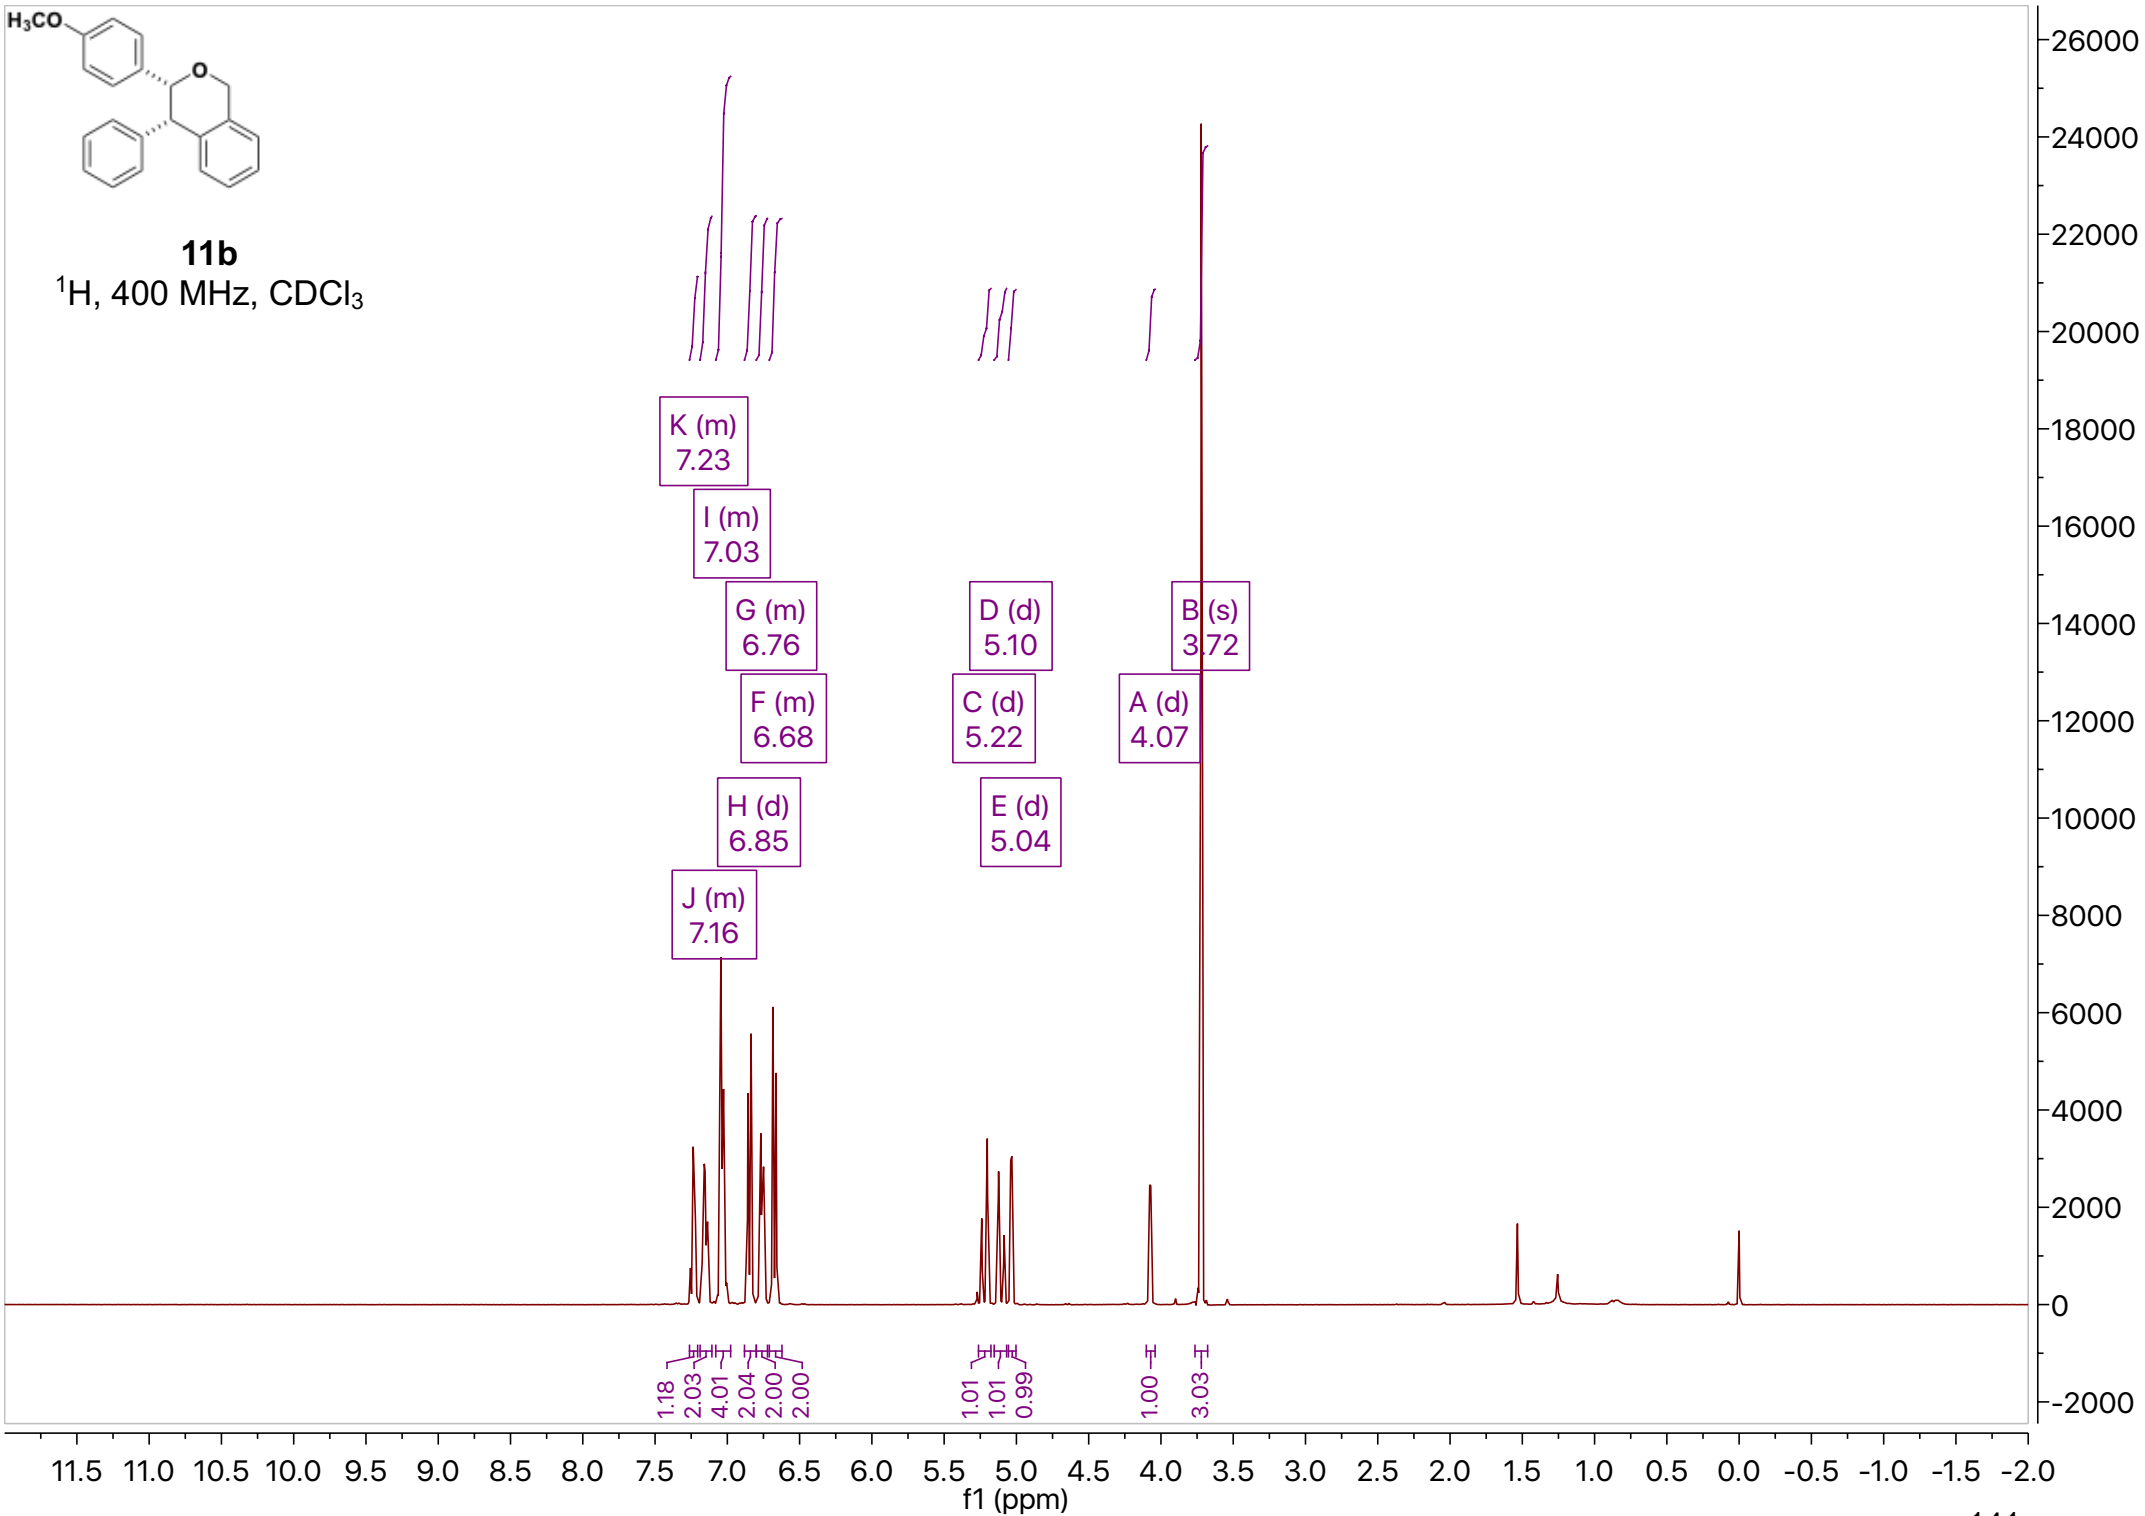



**11b**

$^{13}\text{C}$ , 100 MHz,  $\text{CDCl}_3$

158.60  
140.97  
137.38  
134.38  
132.61  
130.38  
130.33  
127.42  
127.30  
126.94  
126.73  
126.19  
124.17  
113.16

79.89  
69.29  
55.28  
50.53

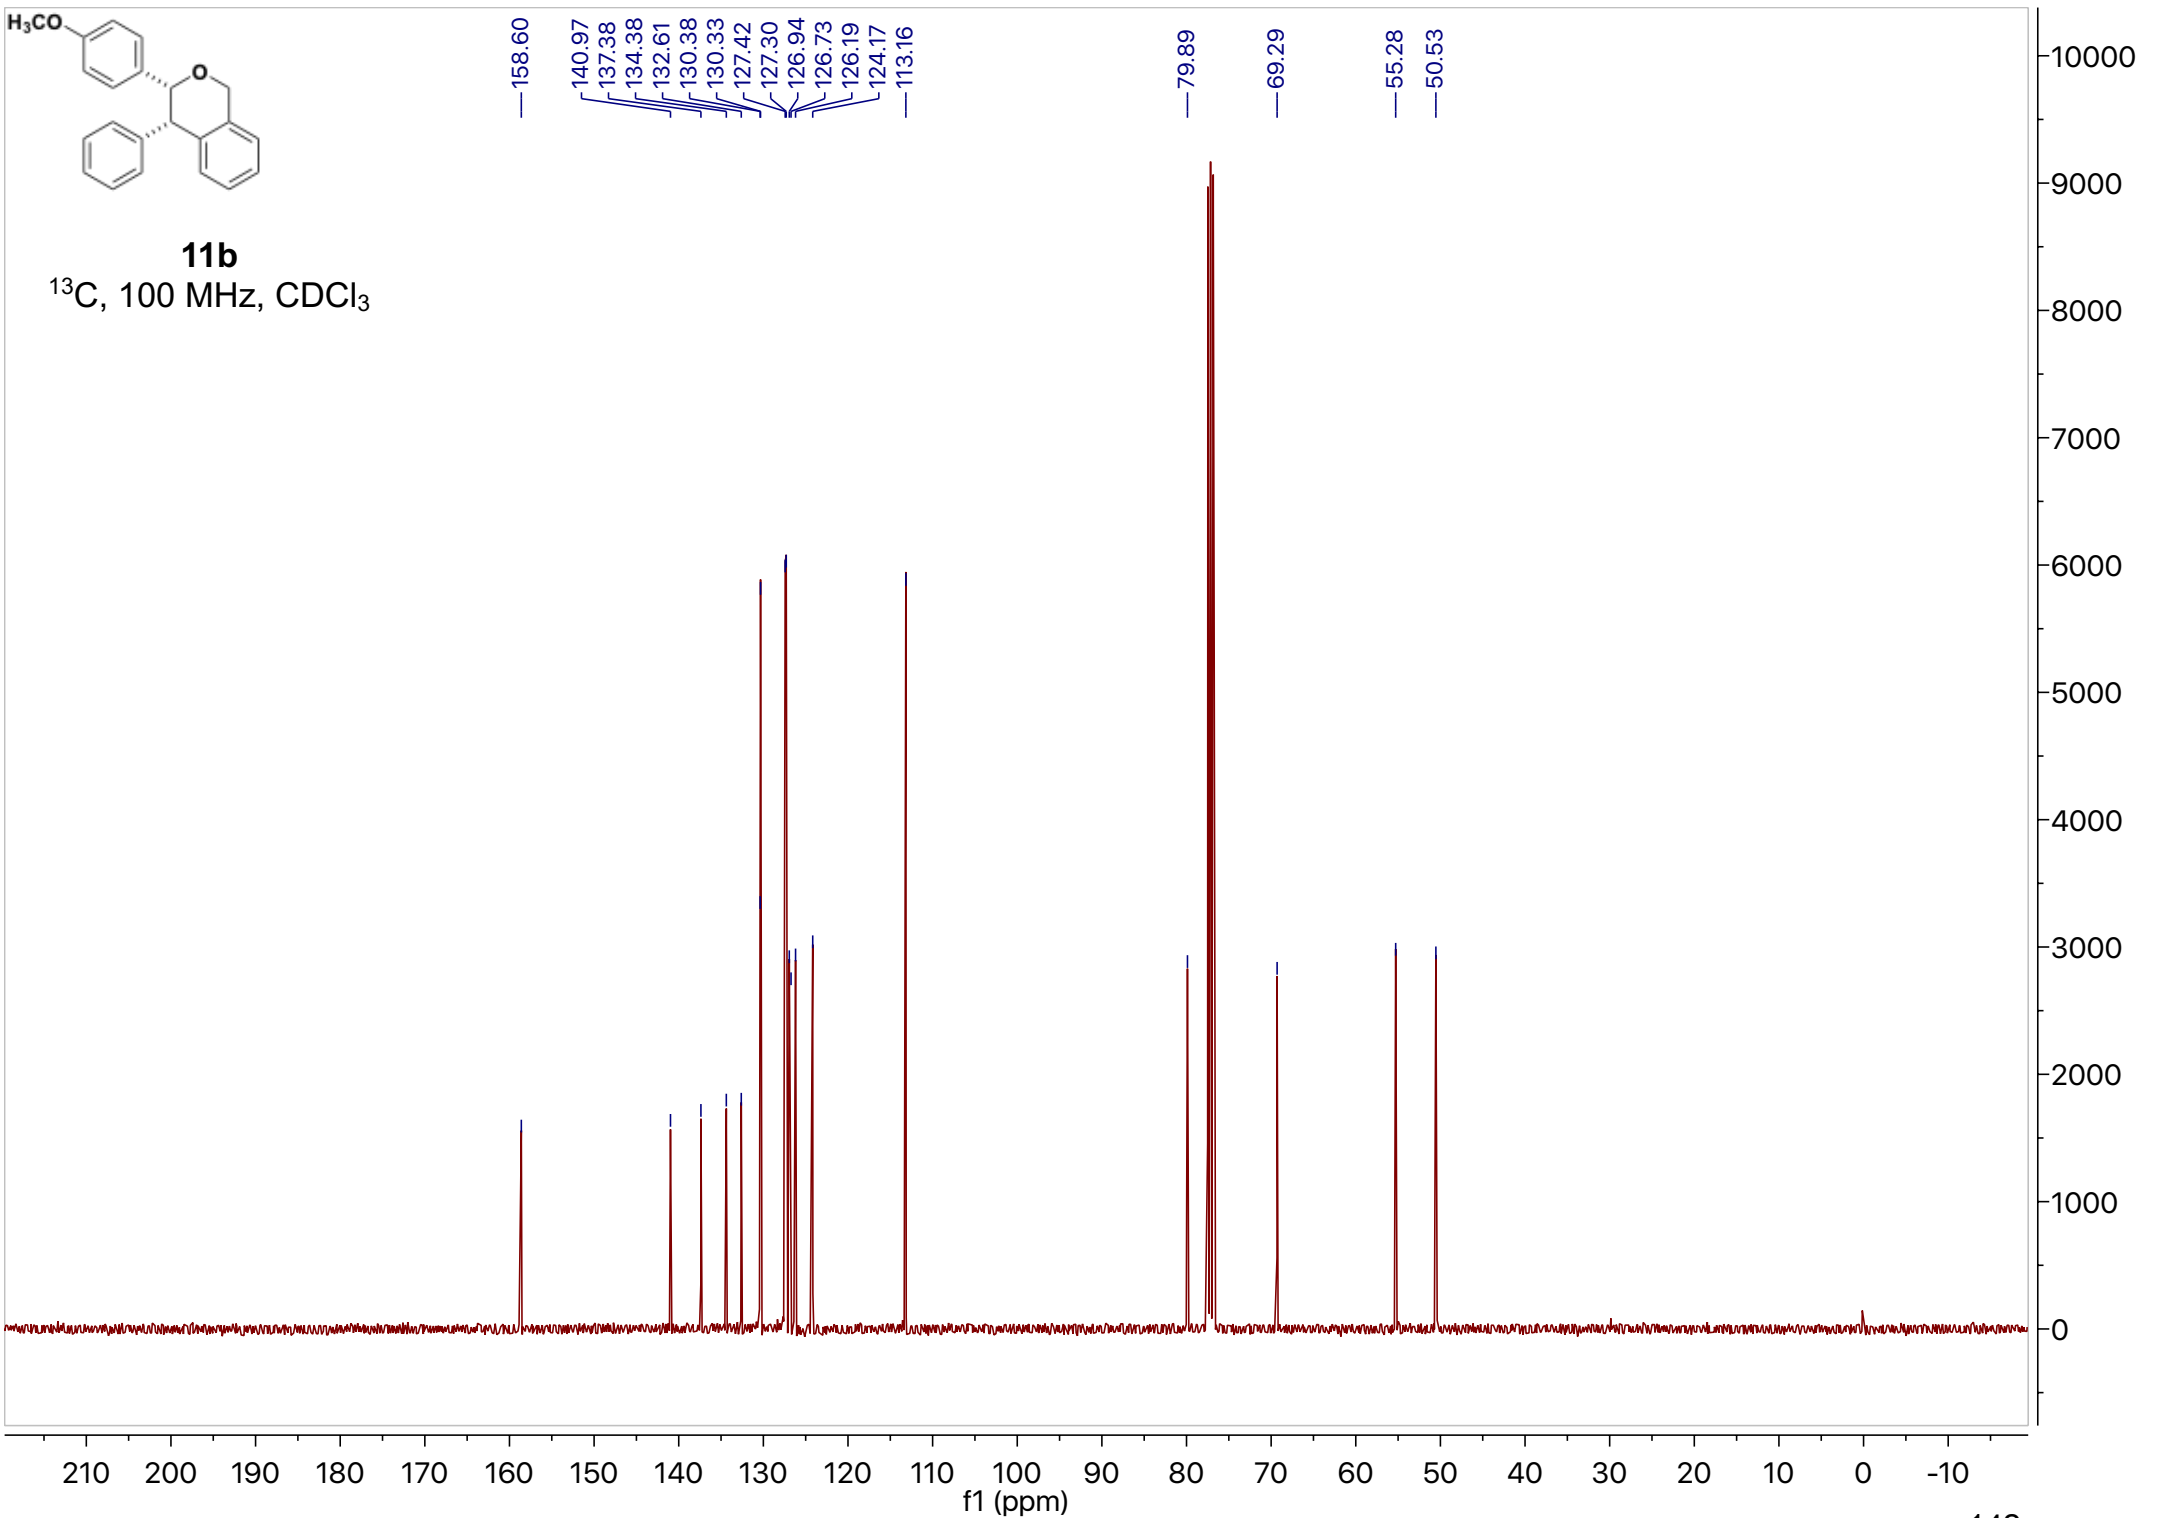

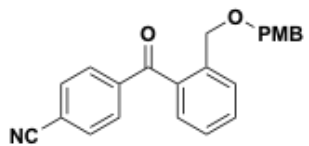

**39**

$^1\text{H}$ , 600 MHz,  $\text{CDCl}_3$

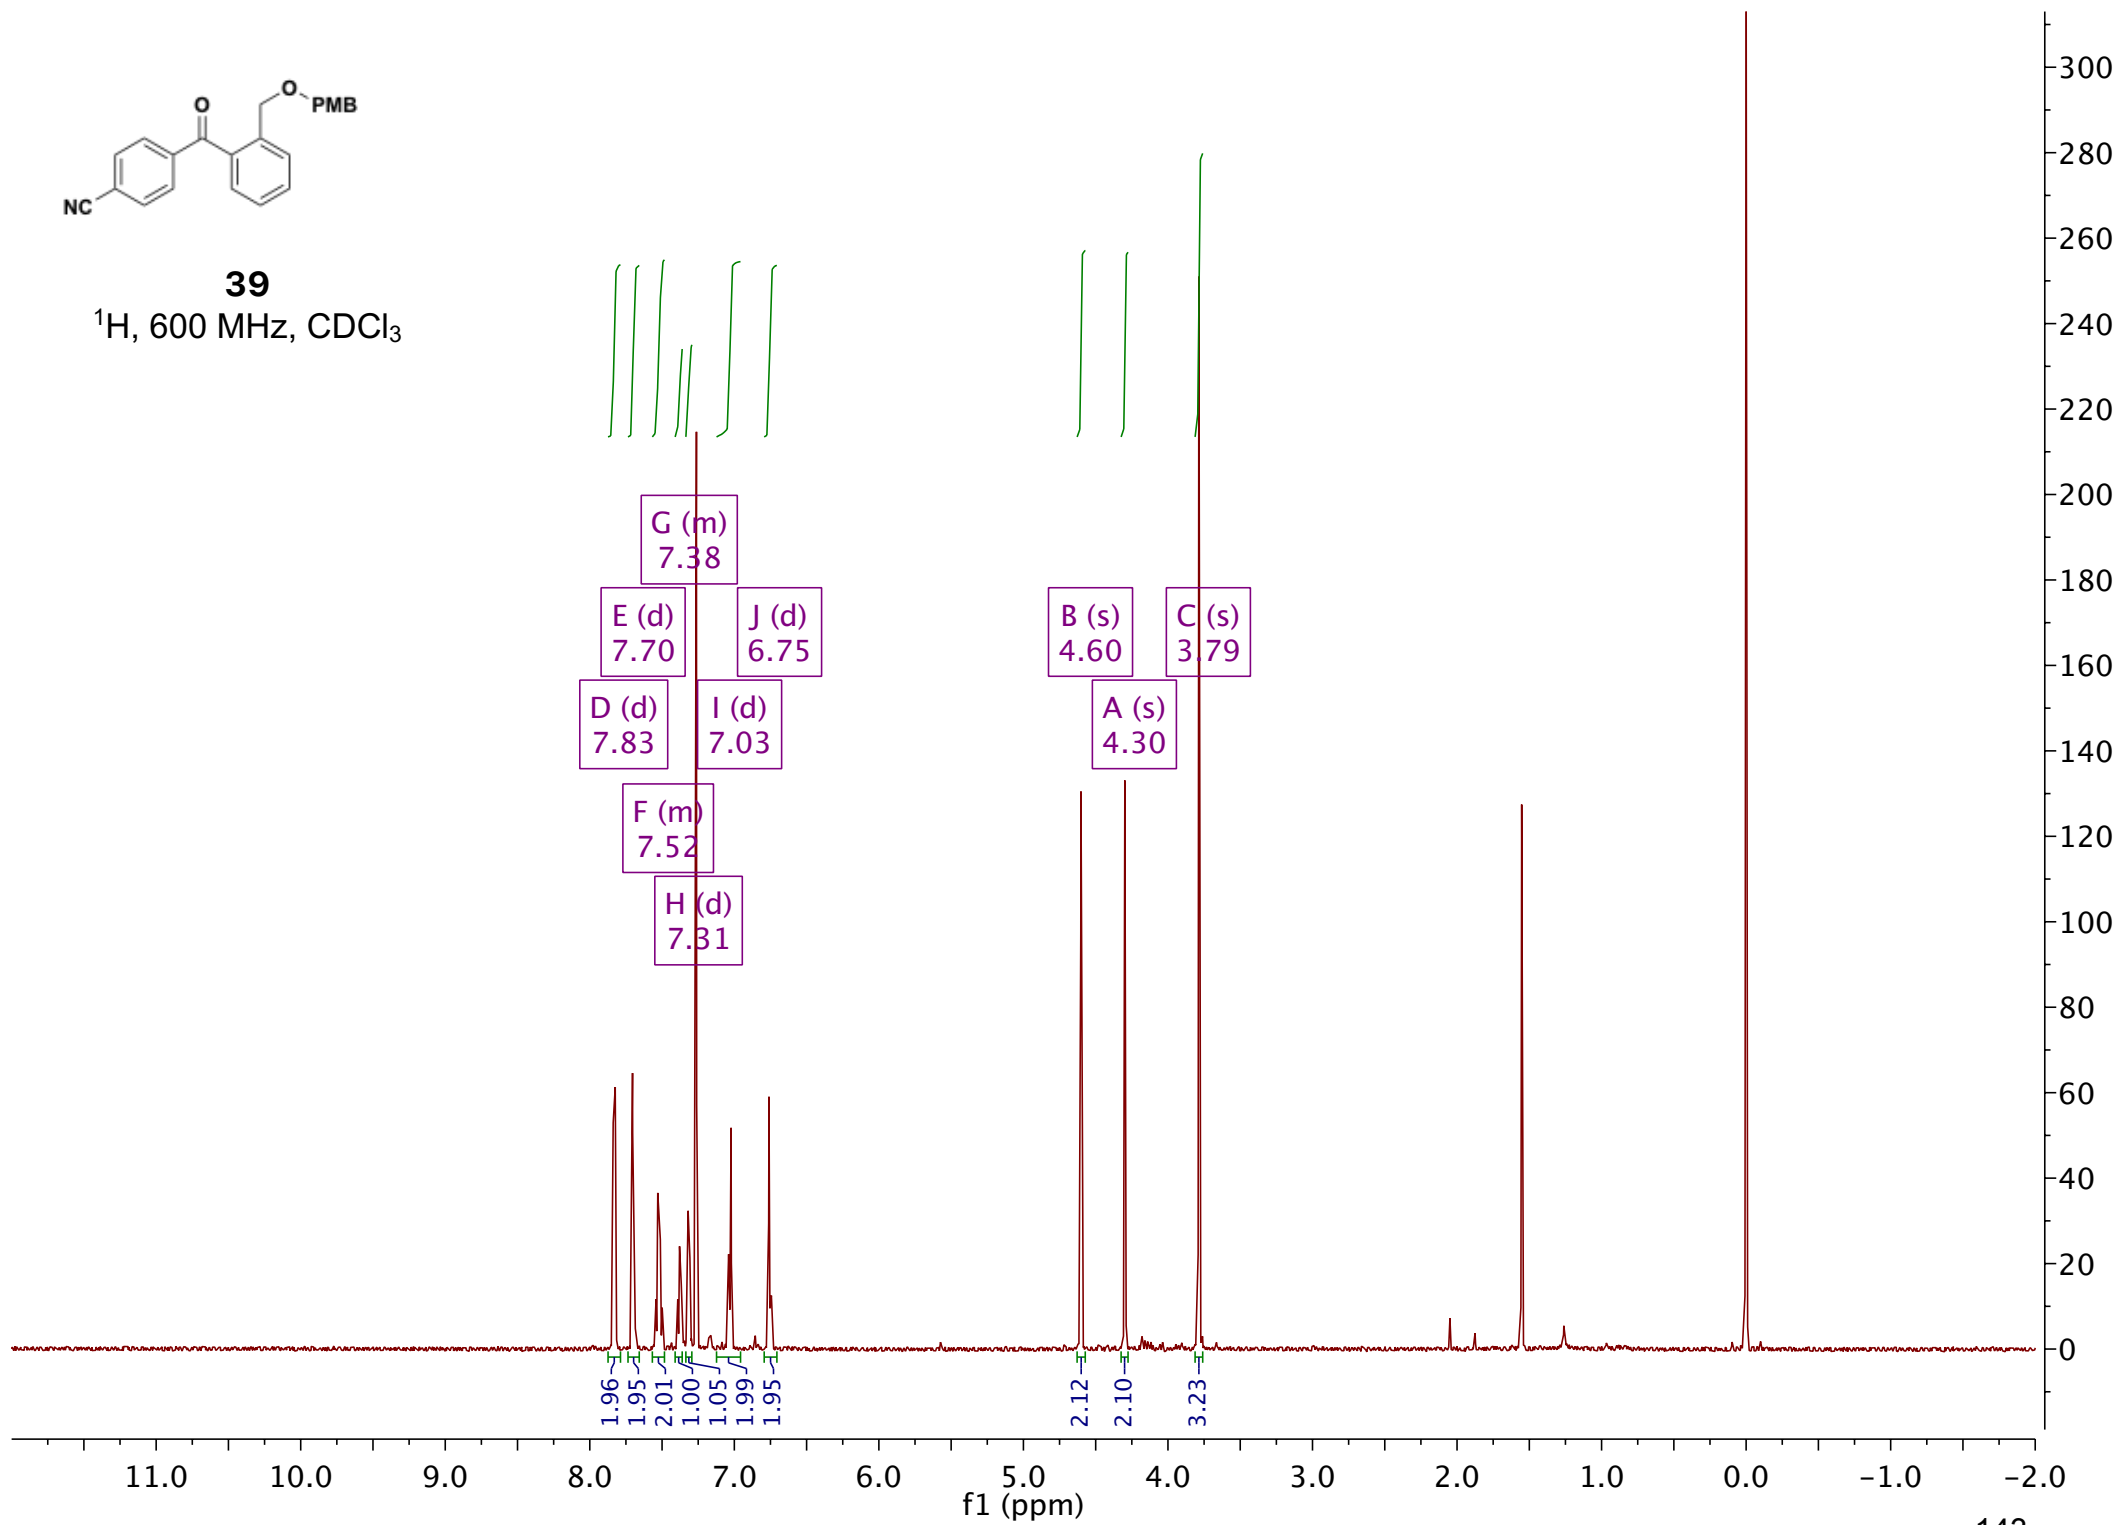

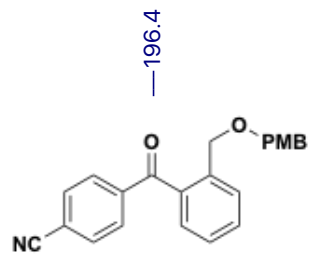

**39**

$^{13}\text{C}$ , 100 MHz,  $\text{CDCl}_3$

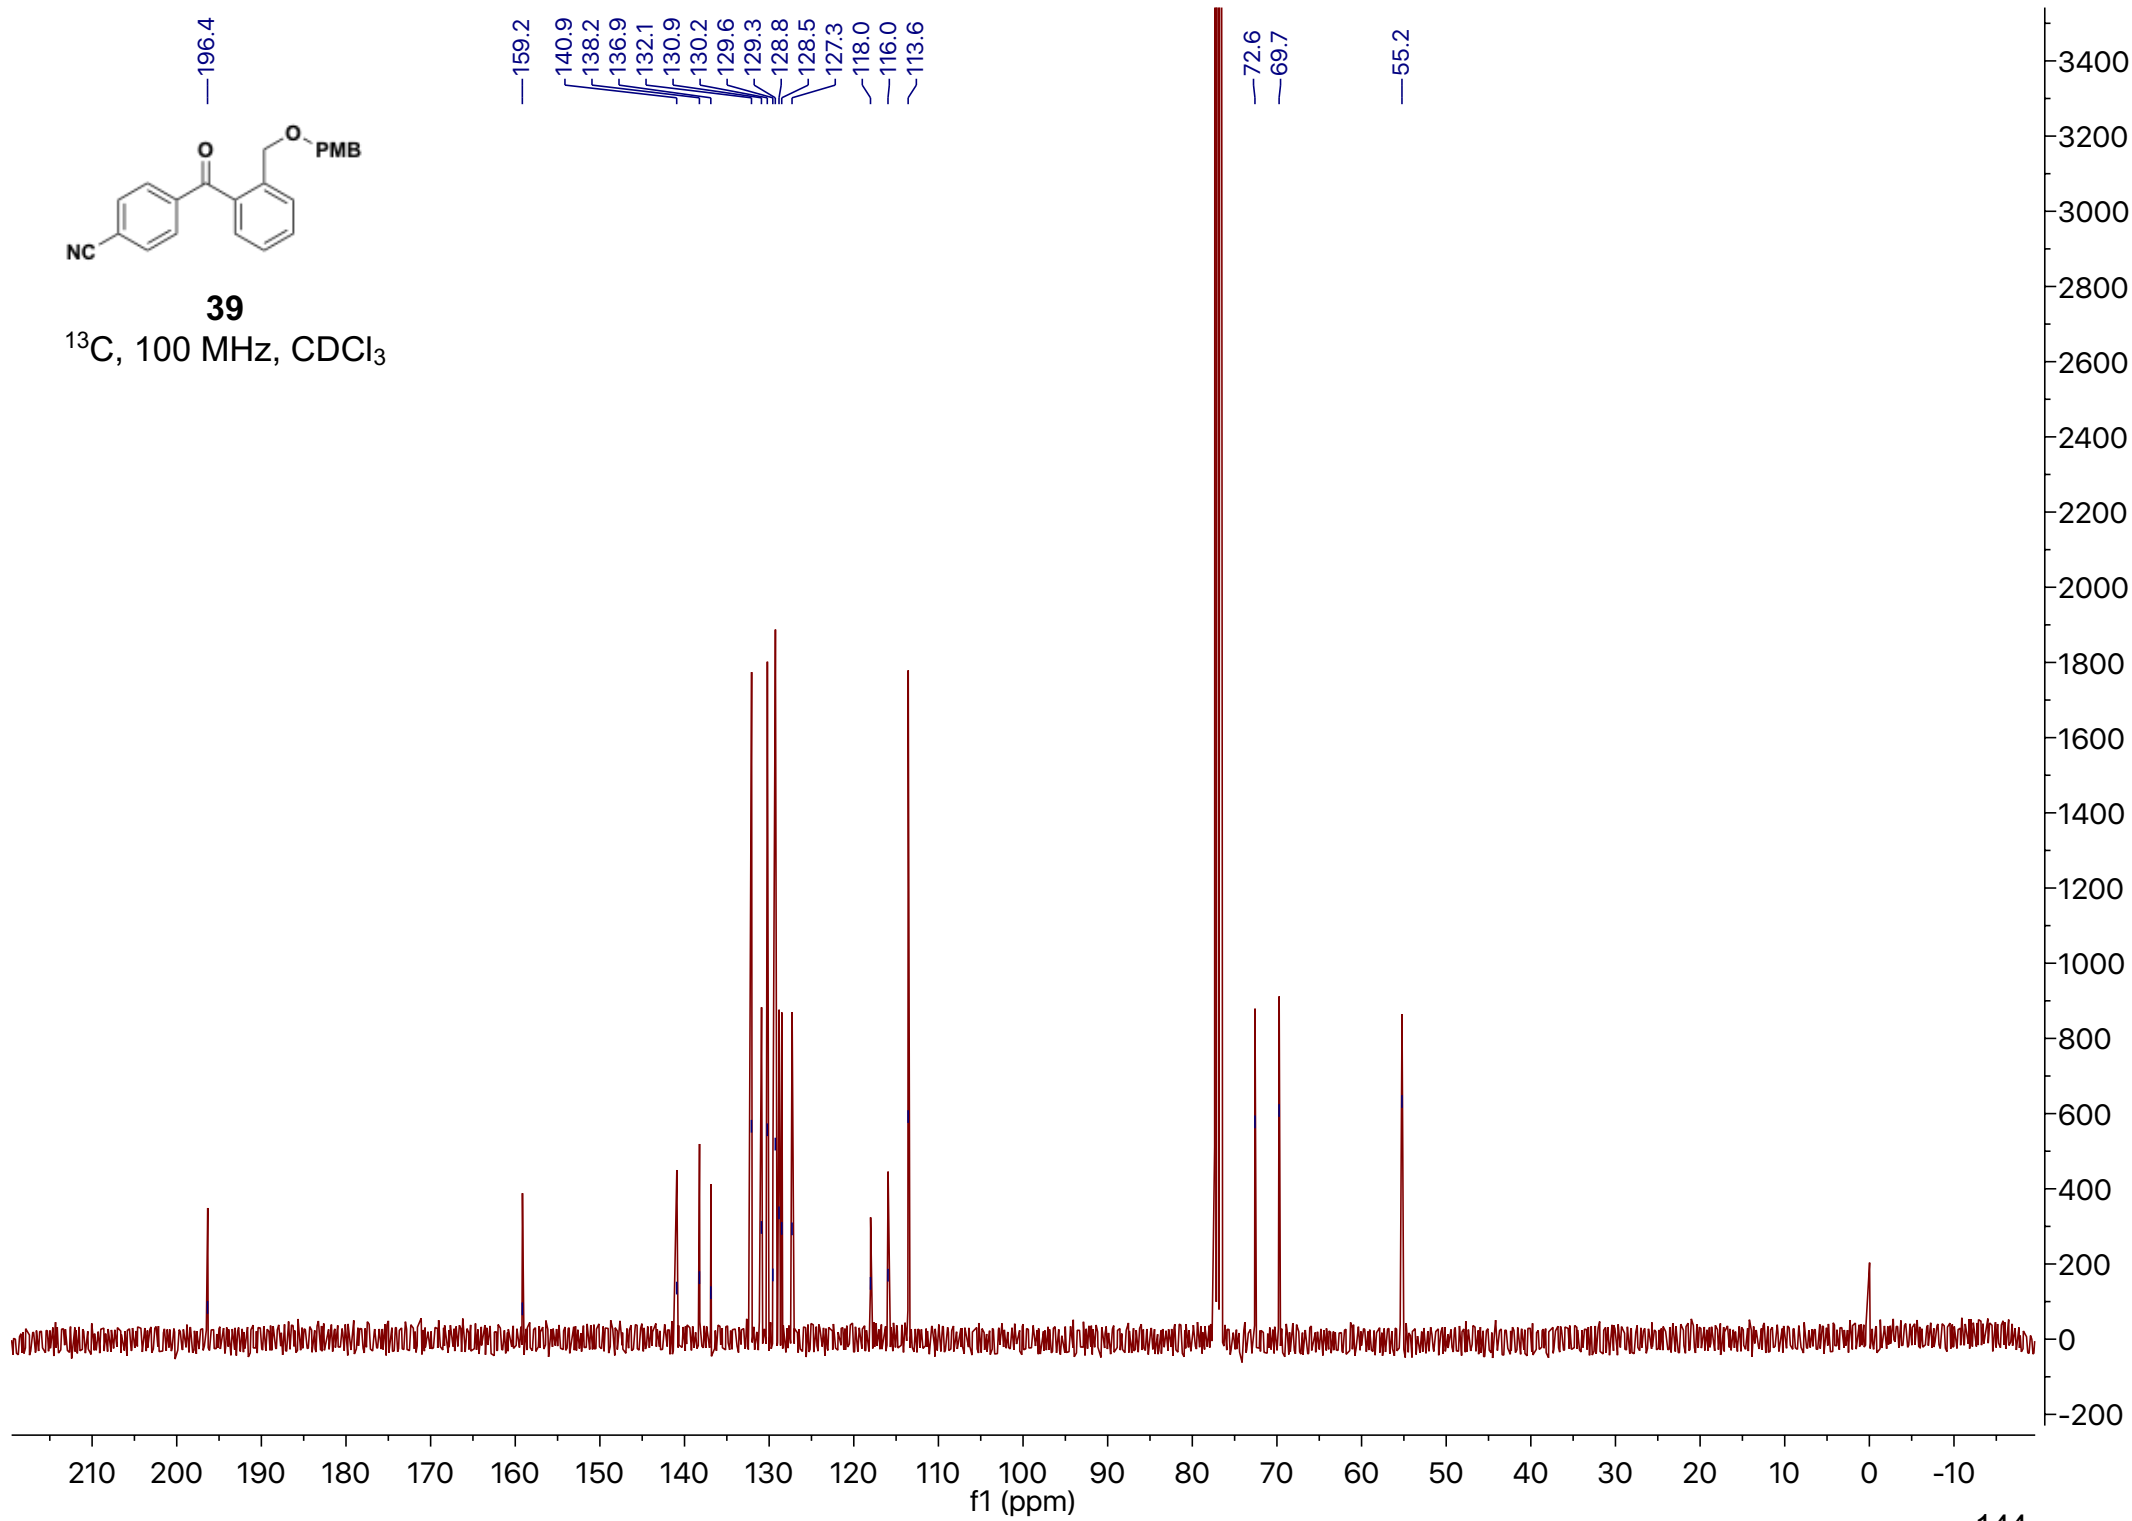

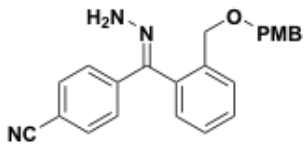

**10c-1**

$^1\text{H}$ , 600 MHz,  $\text{CDCl}_3$

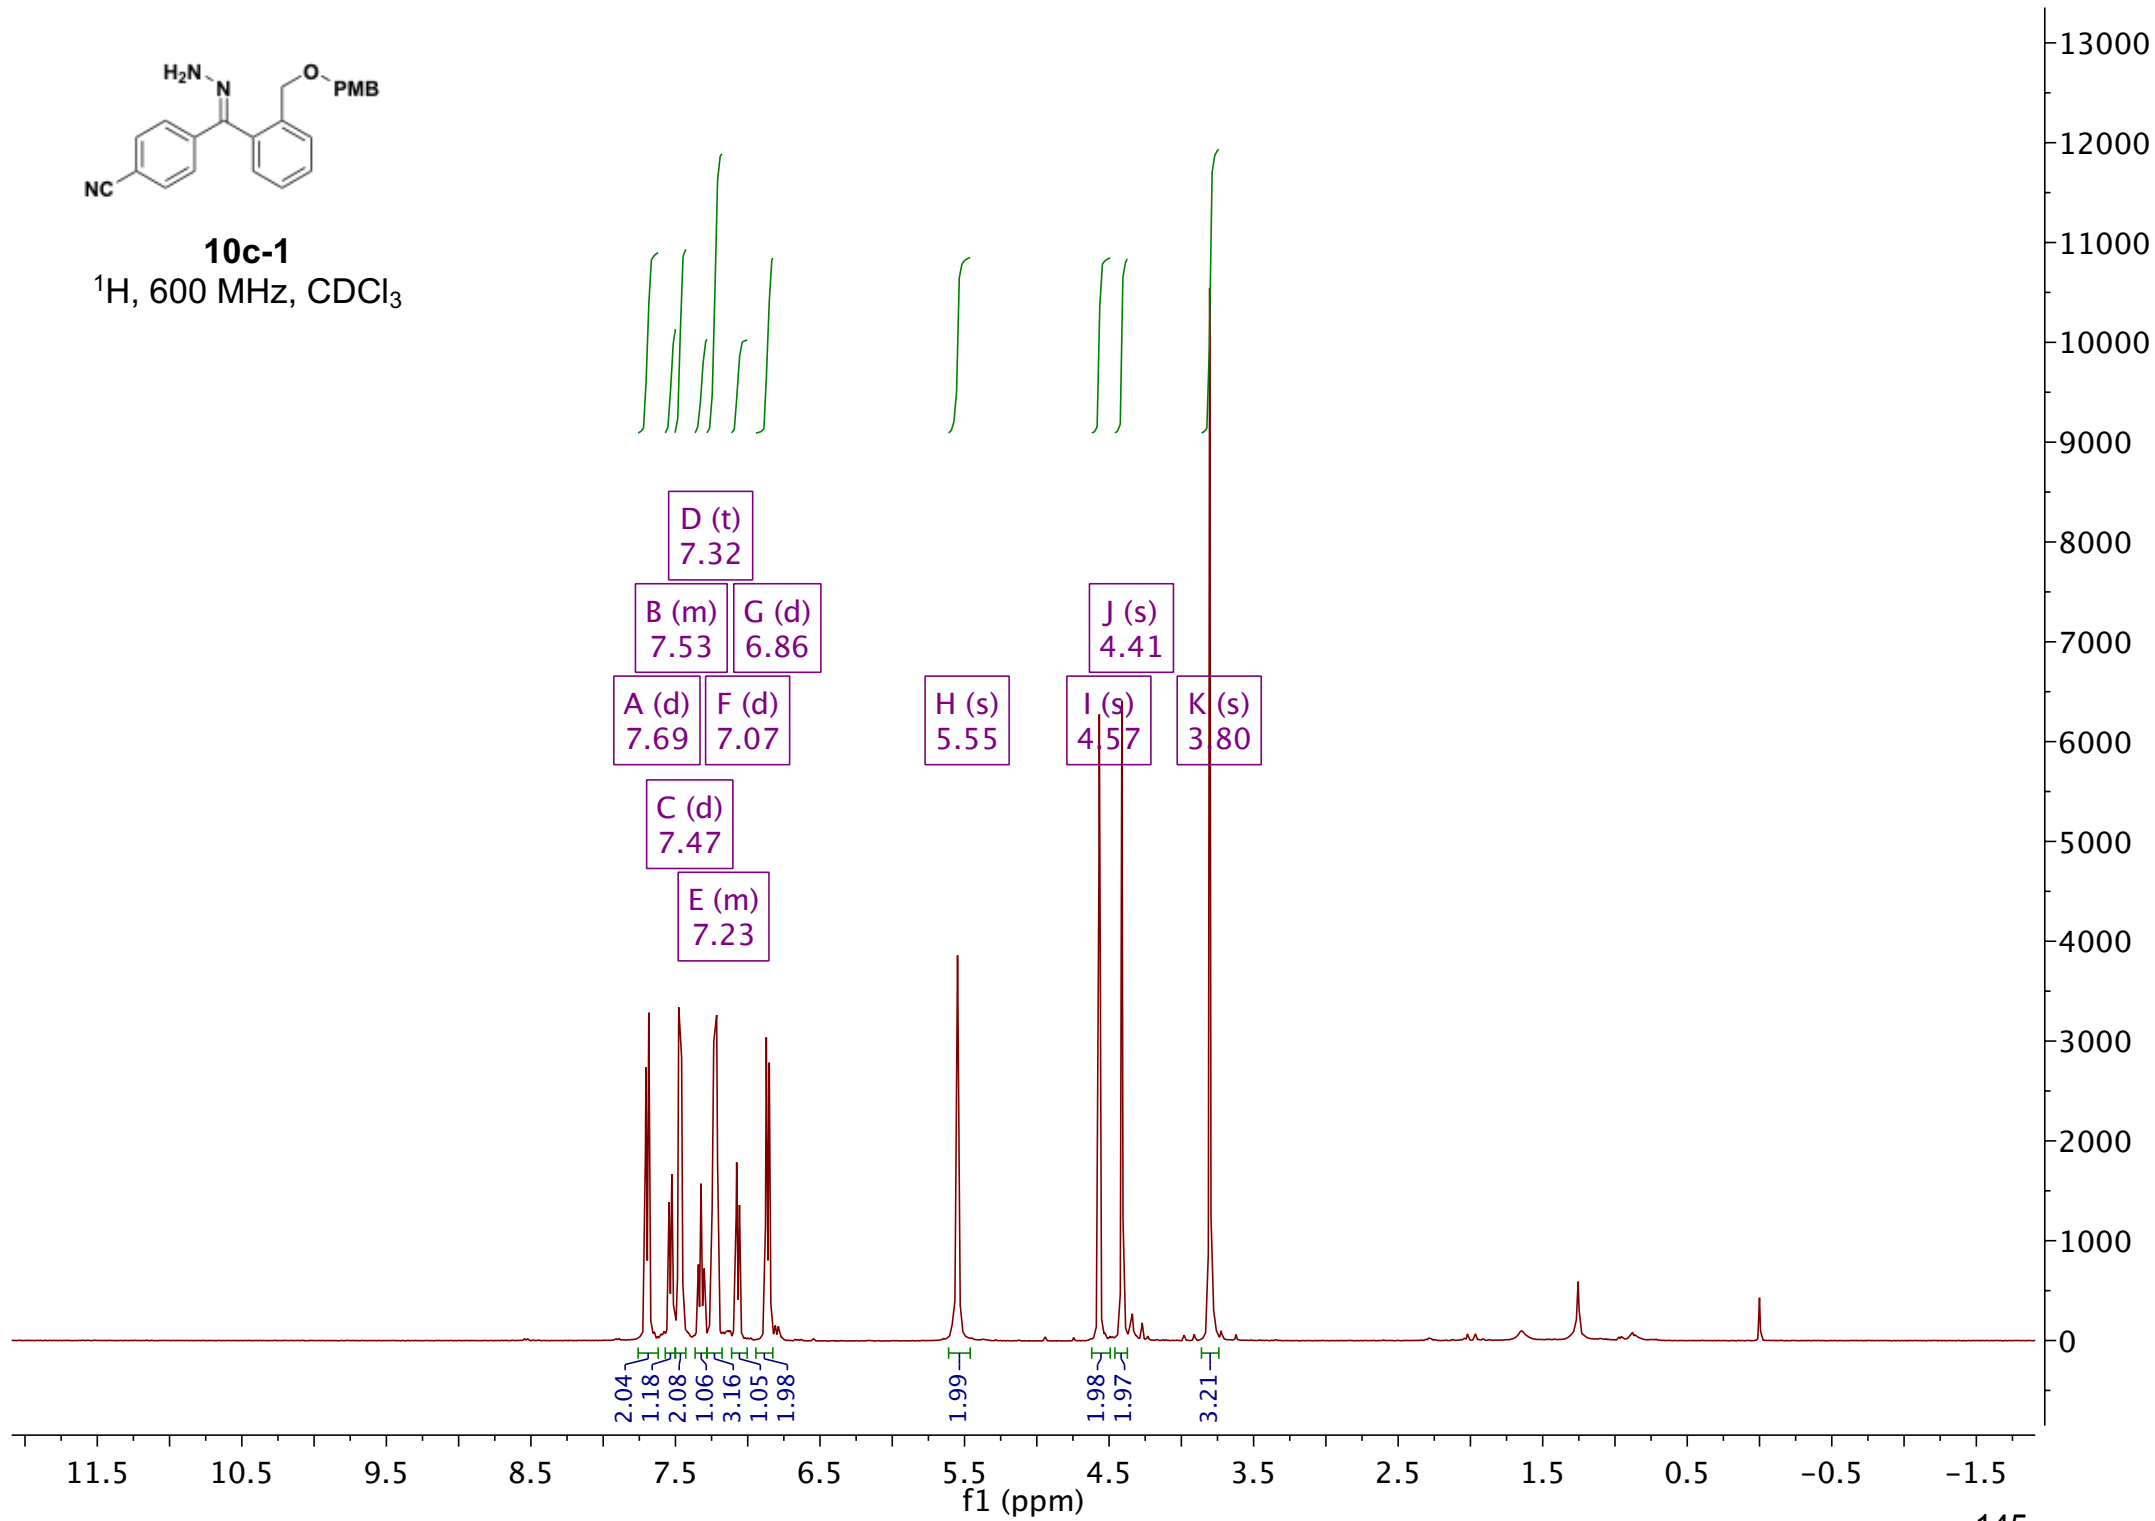

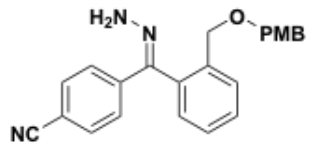

**10c-1**

$^{13}\text{C}$ , 150 MHz,  $\text{CDCl}_3$

159.18  
146.52  
138.31  
137.25  
137.21  
132.74  
130.29  
129.85  
129.73  
129.46  
128.97  
128.43  
127.37  
118.32  
113.70  
112.51  
72.09  
70.10  
55.29

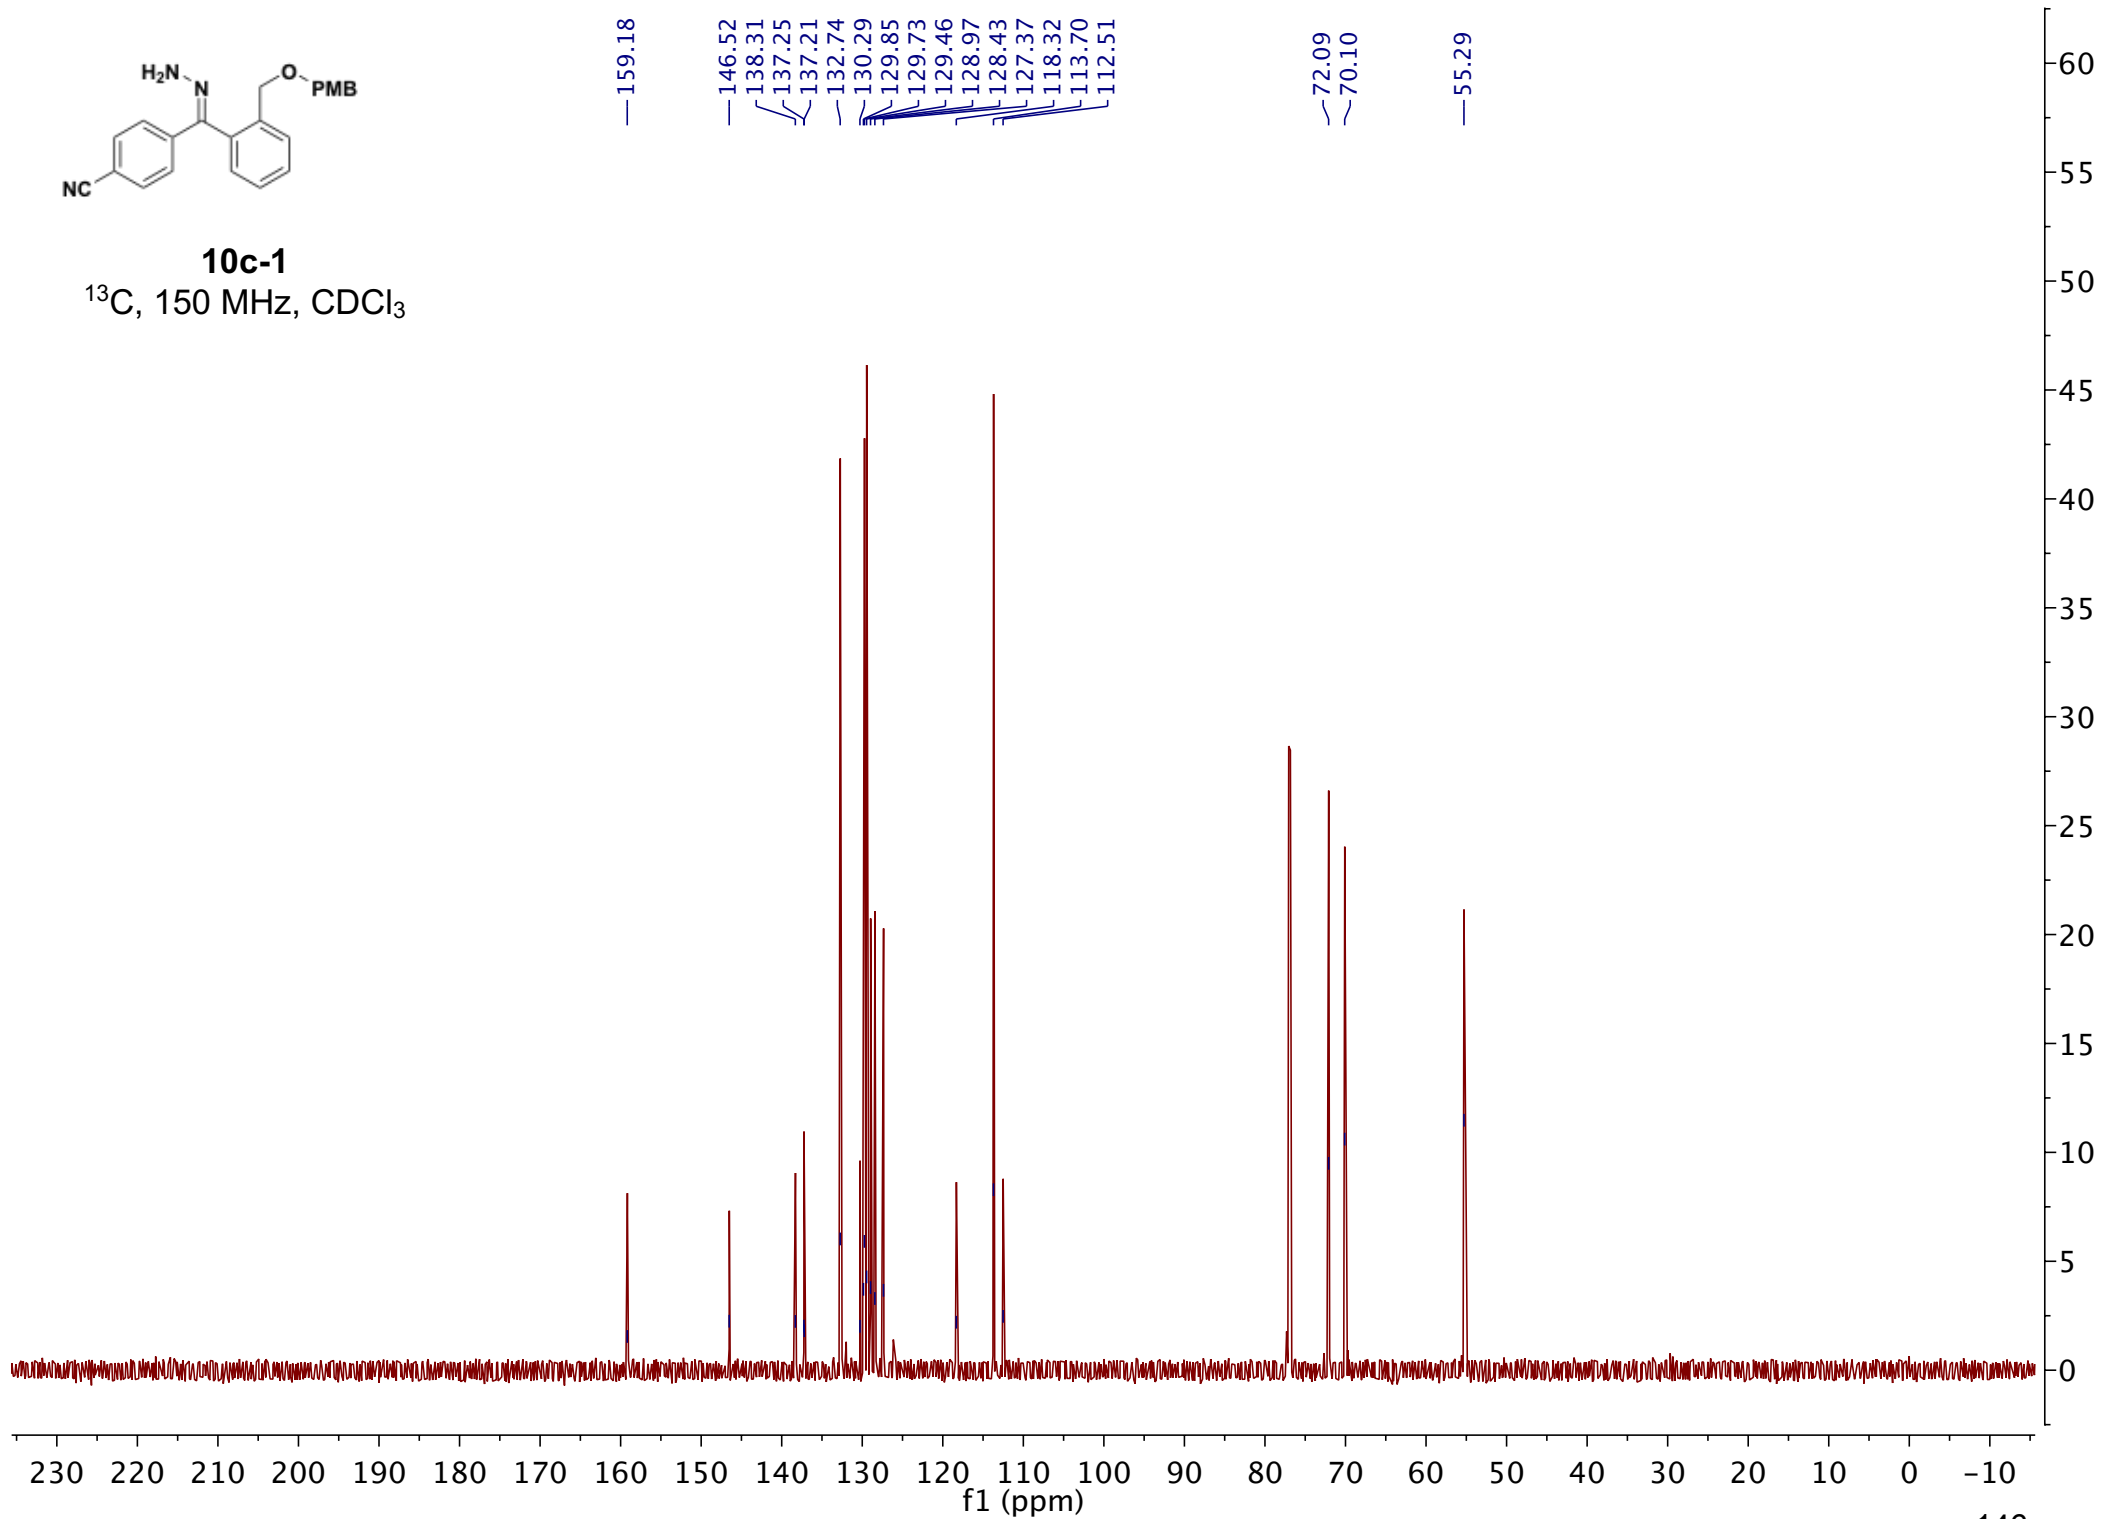



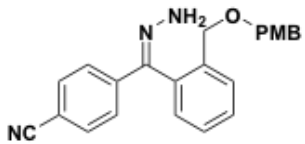

**10c-2**  
 $^1\text{H}$ , 400 MHz,  $\text{CDCl}_3$

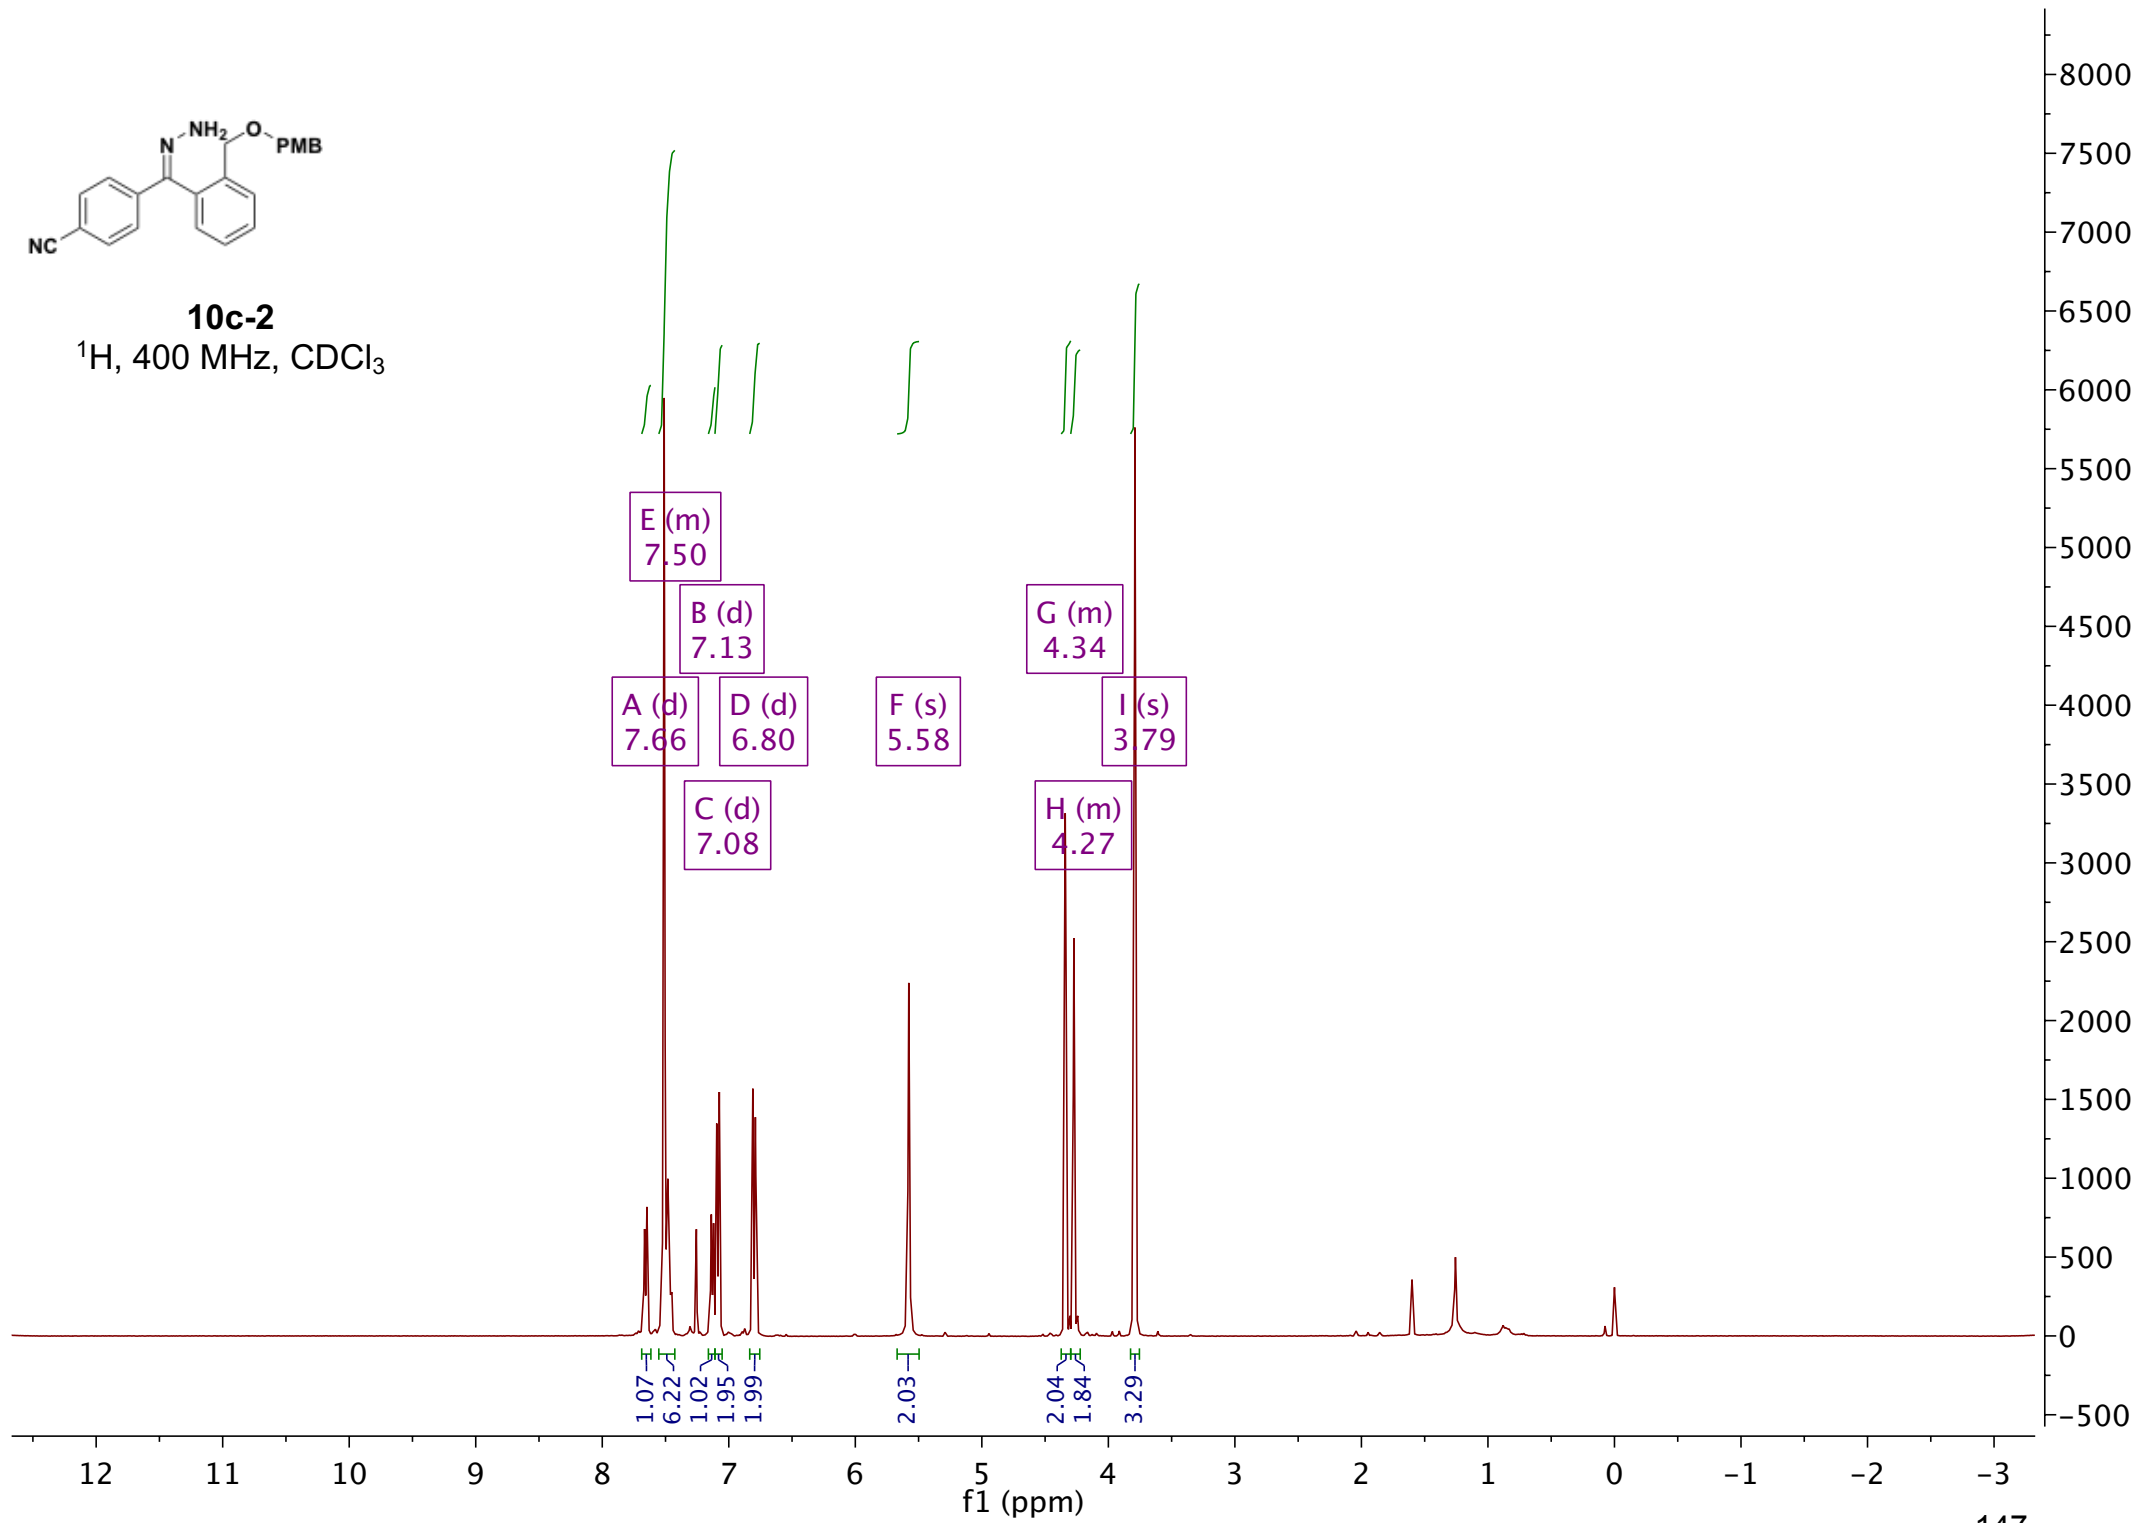

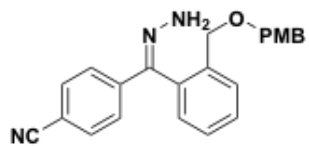

**10c-2**

$^{13}\text{C}$ , 150 MHz,  $\text{CDCl}_3$

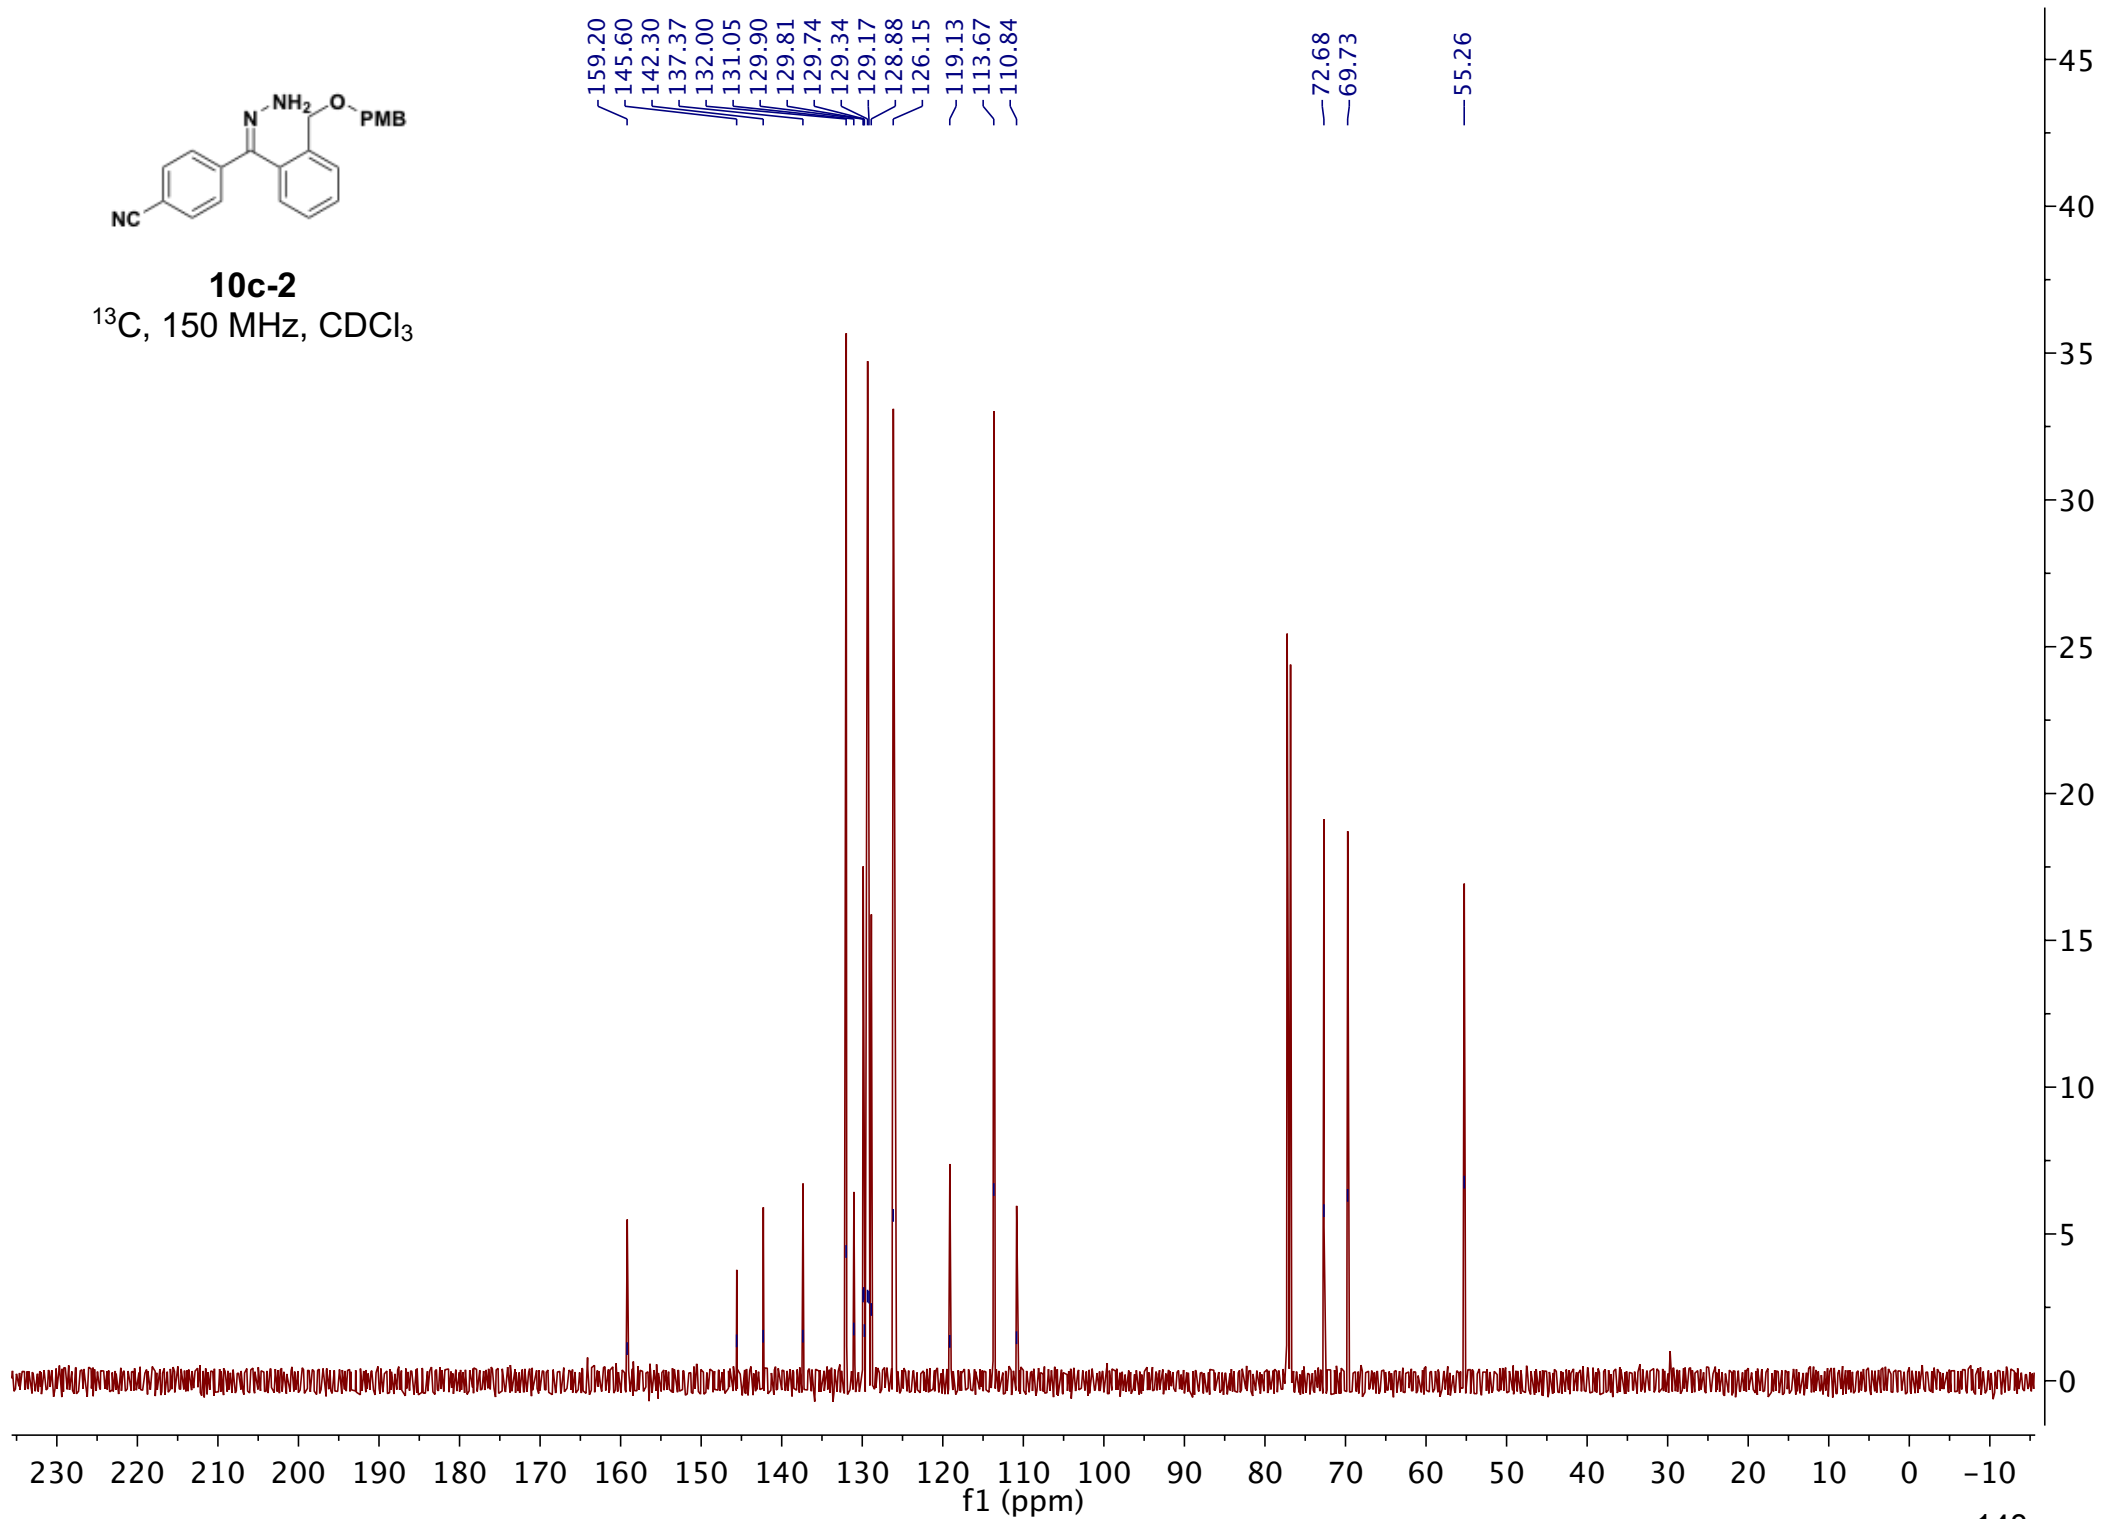

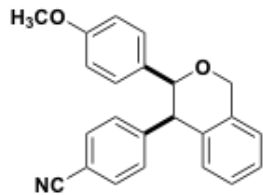

**11c**  
 $^1\text{H}$ , 600 MHz,  $\text{CDCl}_3$

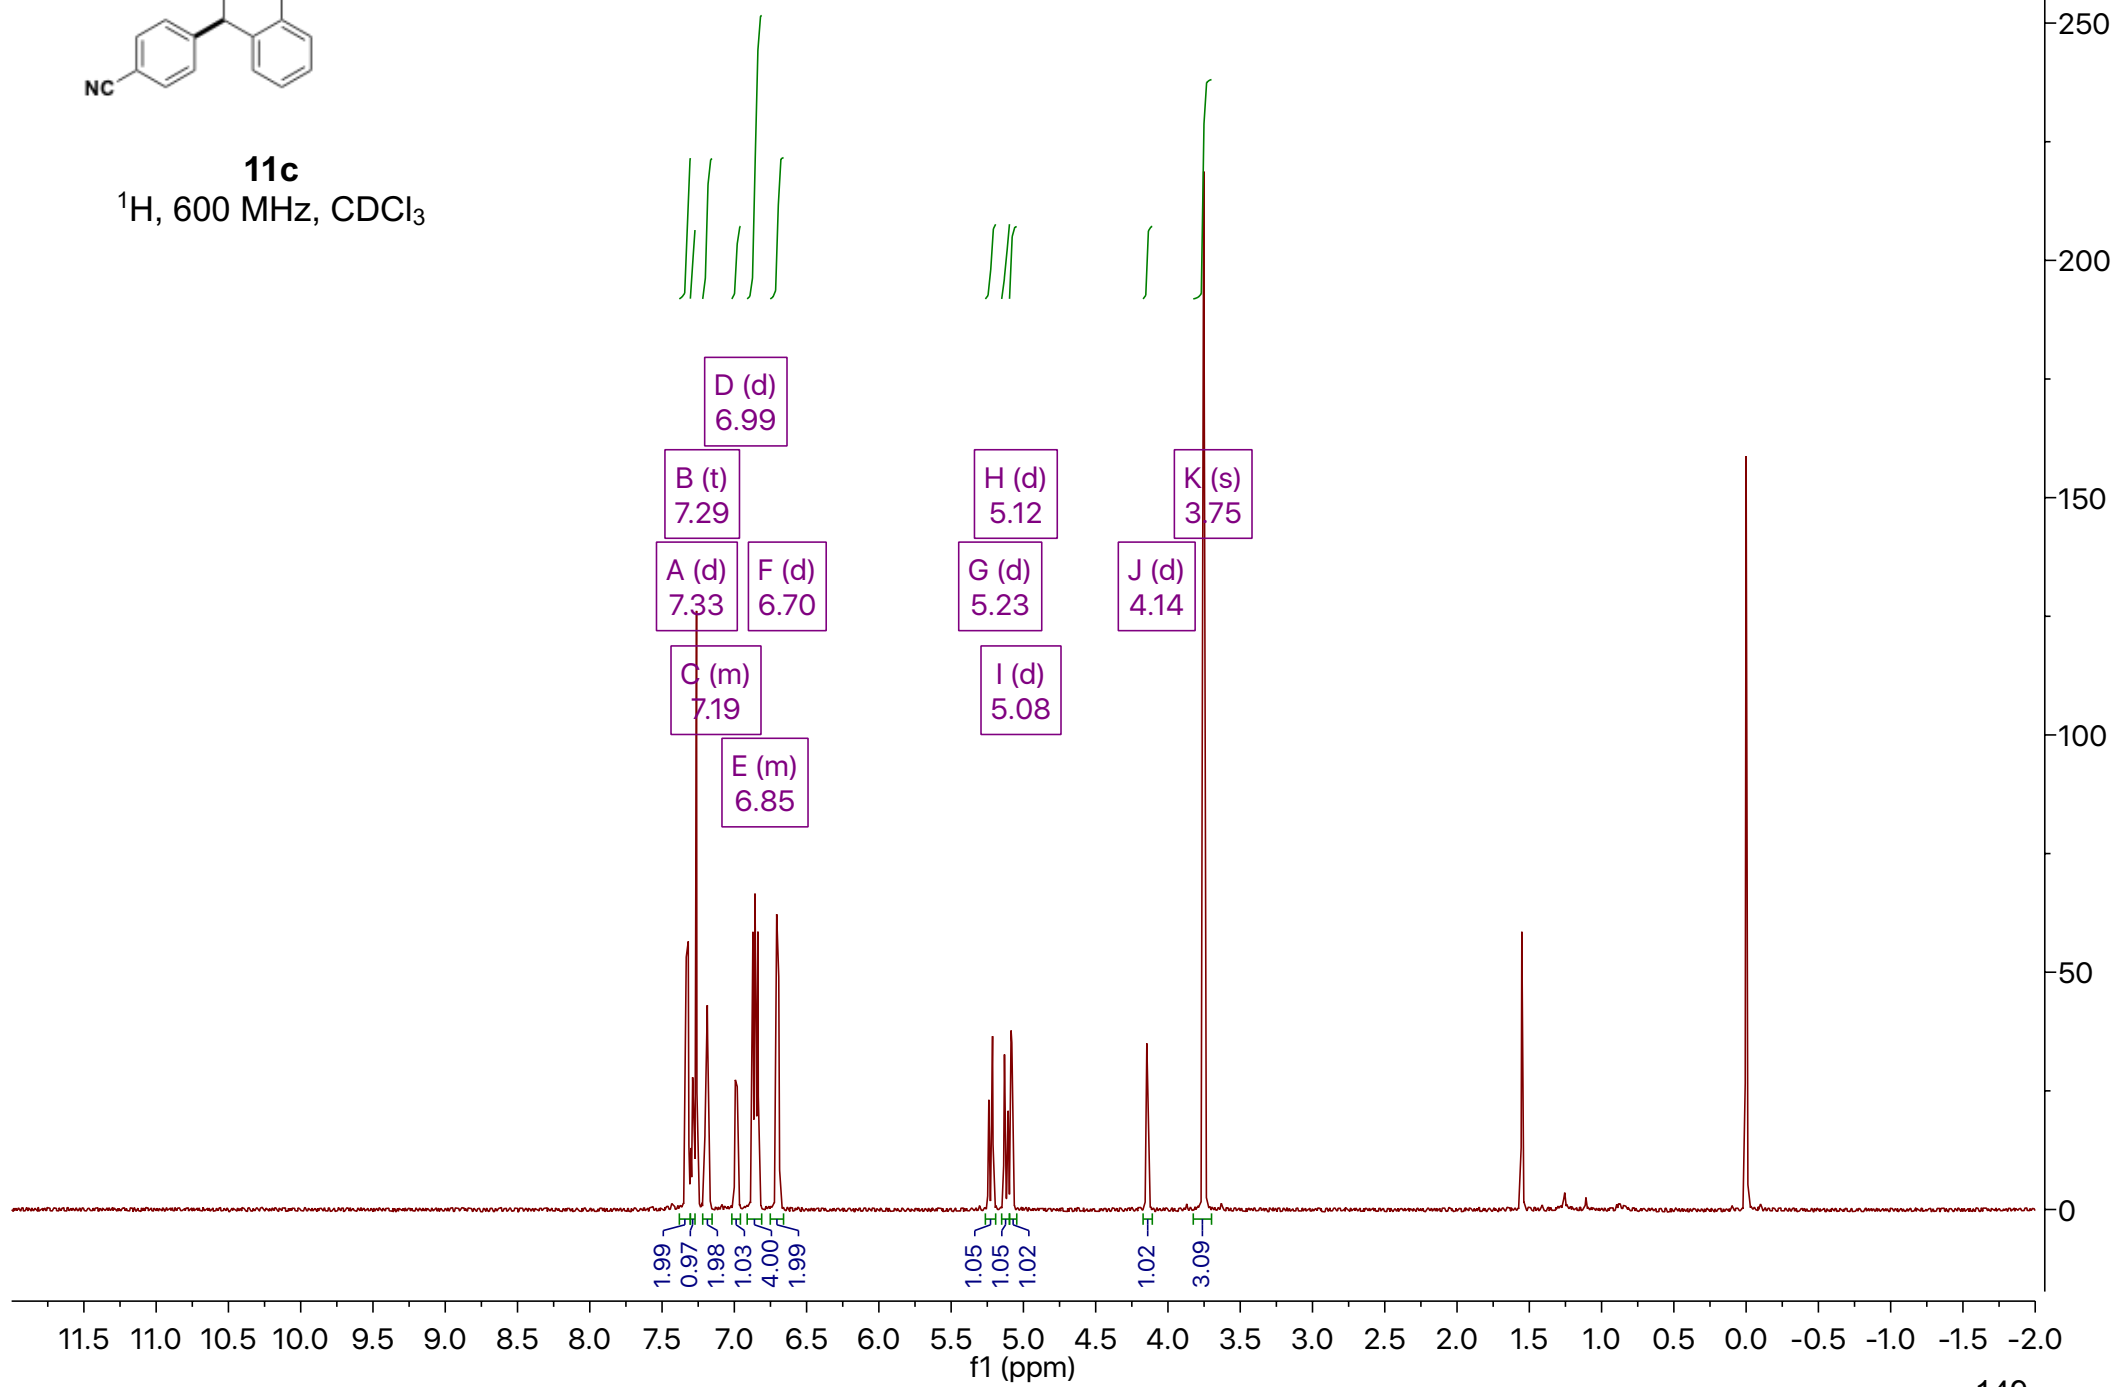

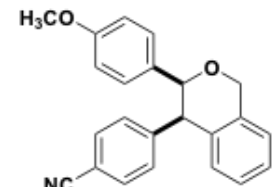

**11c**

$^{13}\text{C}$ , 150 MHz,  $\text{CDCl}_3$

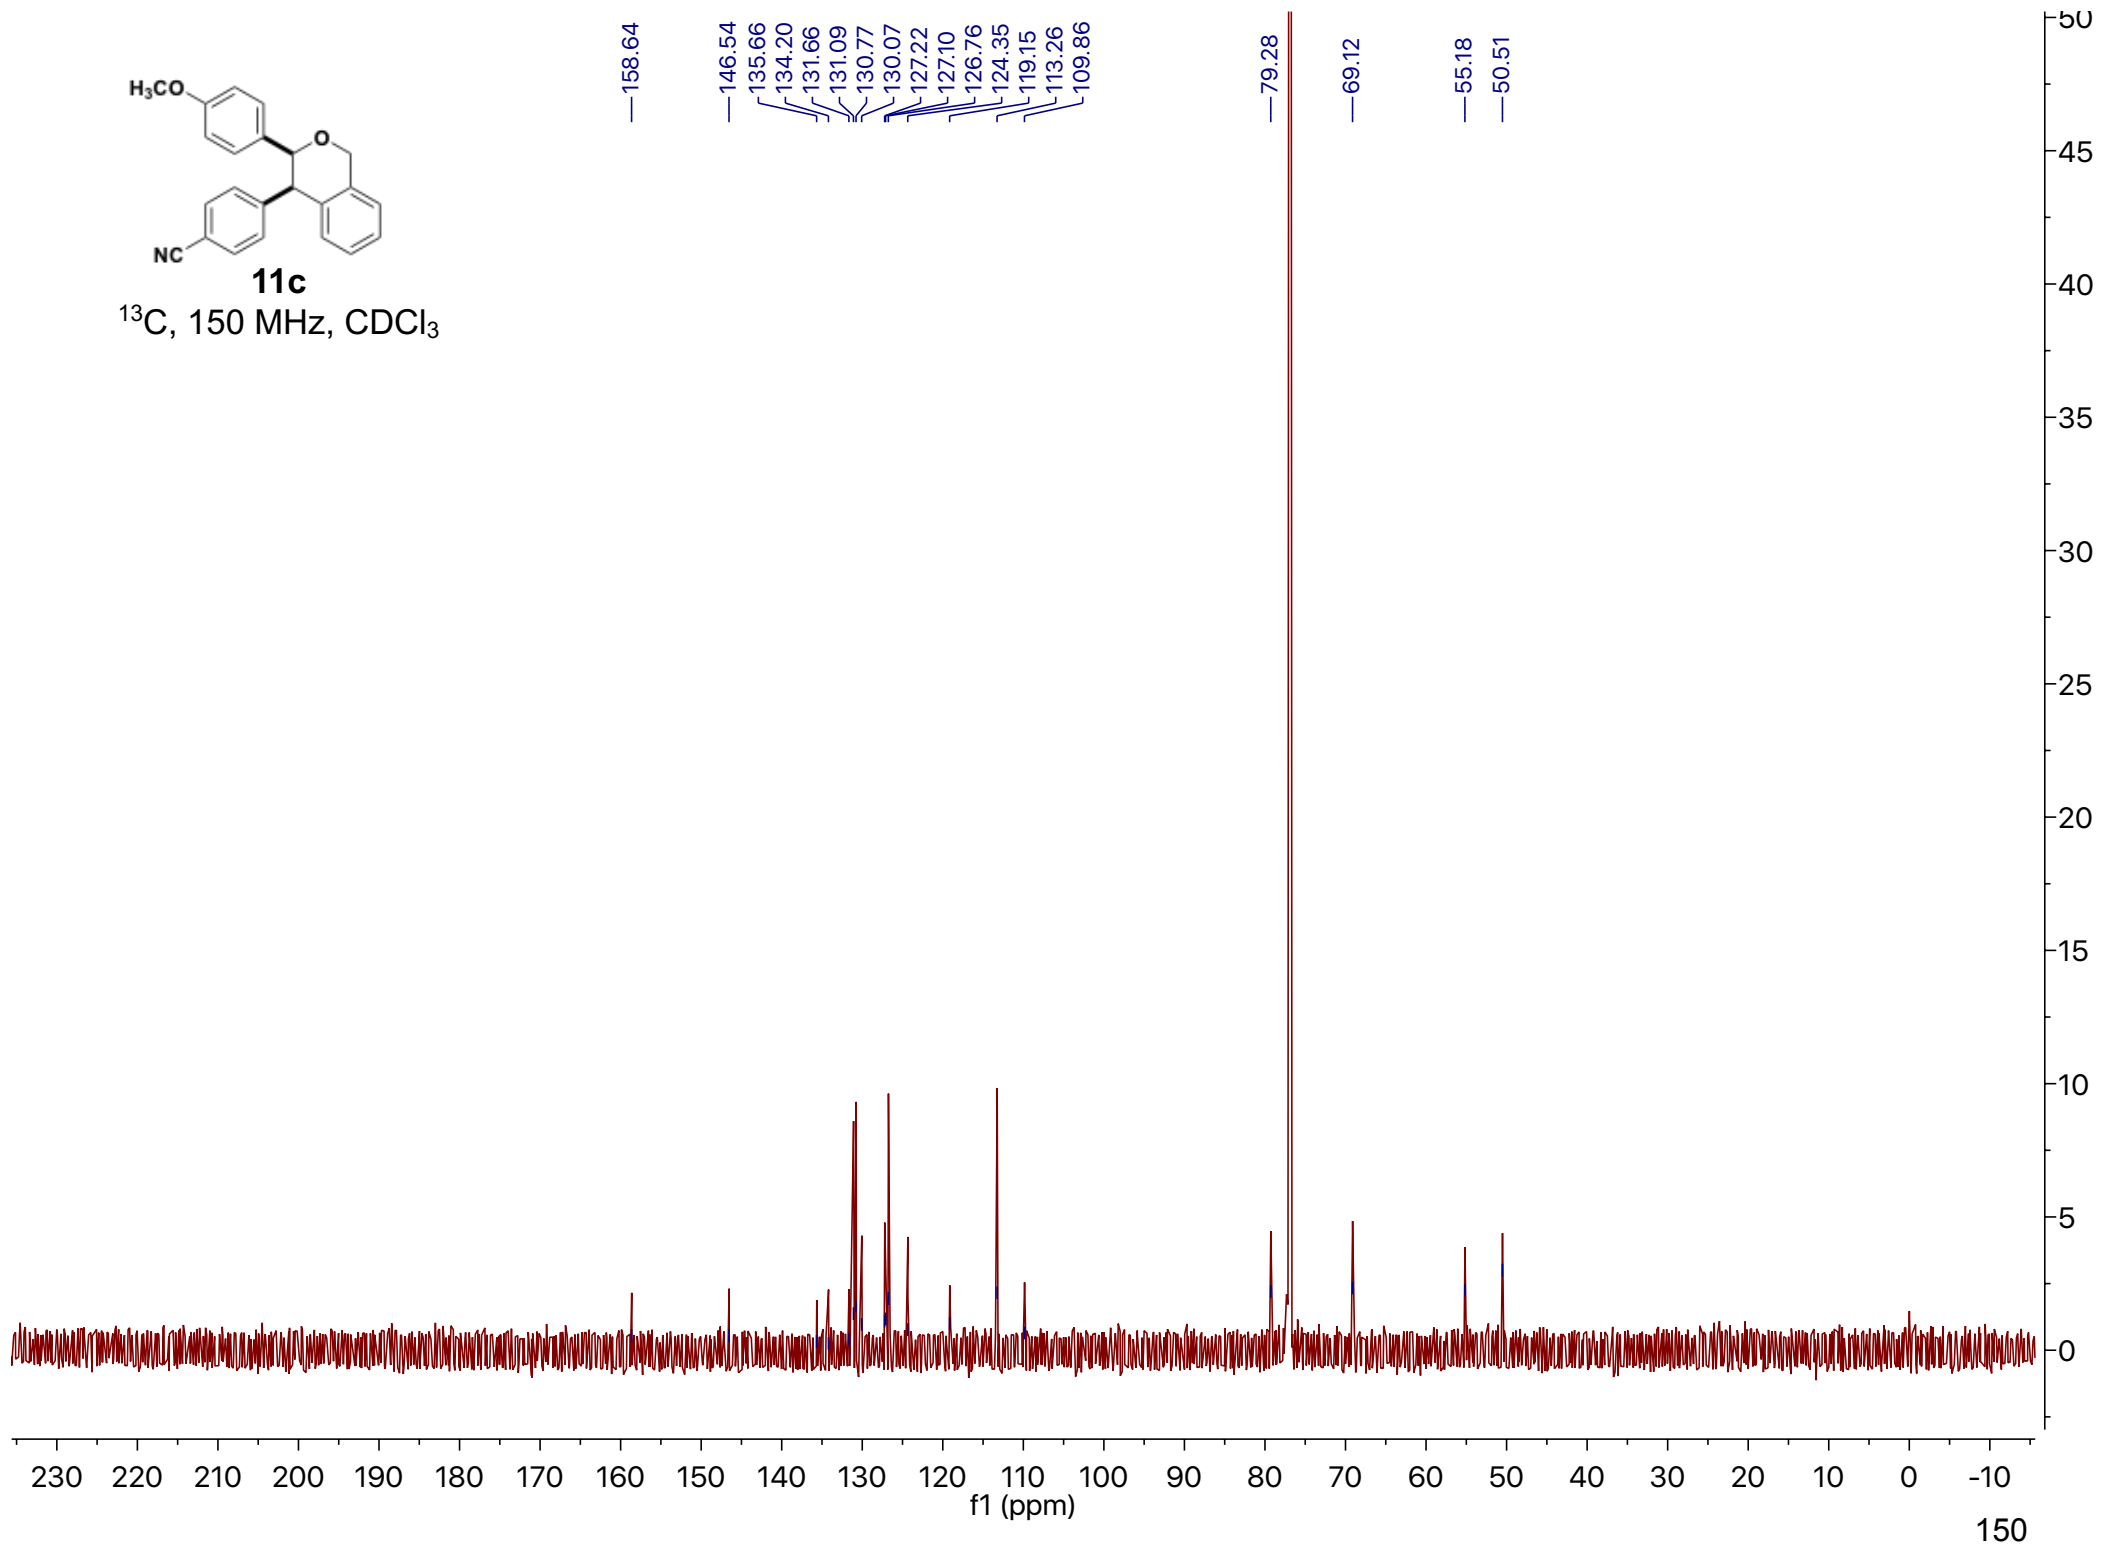

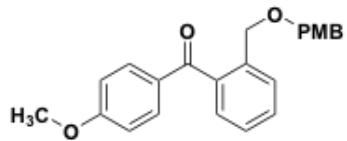

**41**

<sup>1</sup>H, 600 MHz, CDCl<sub>3</sub>

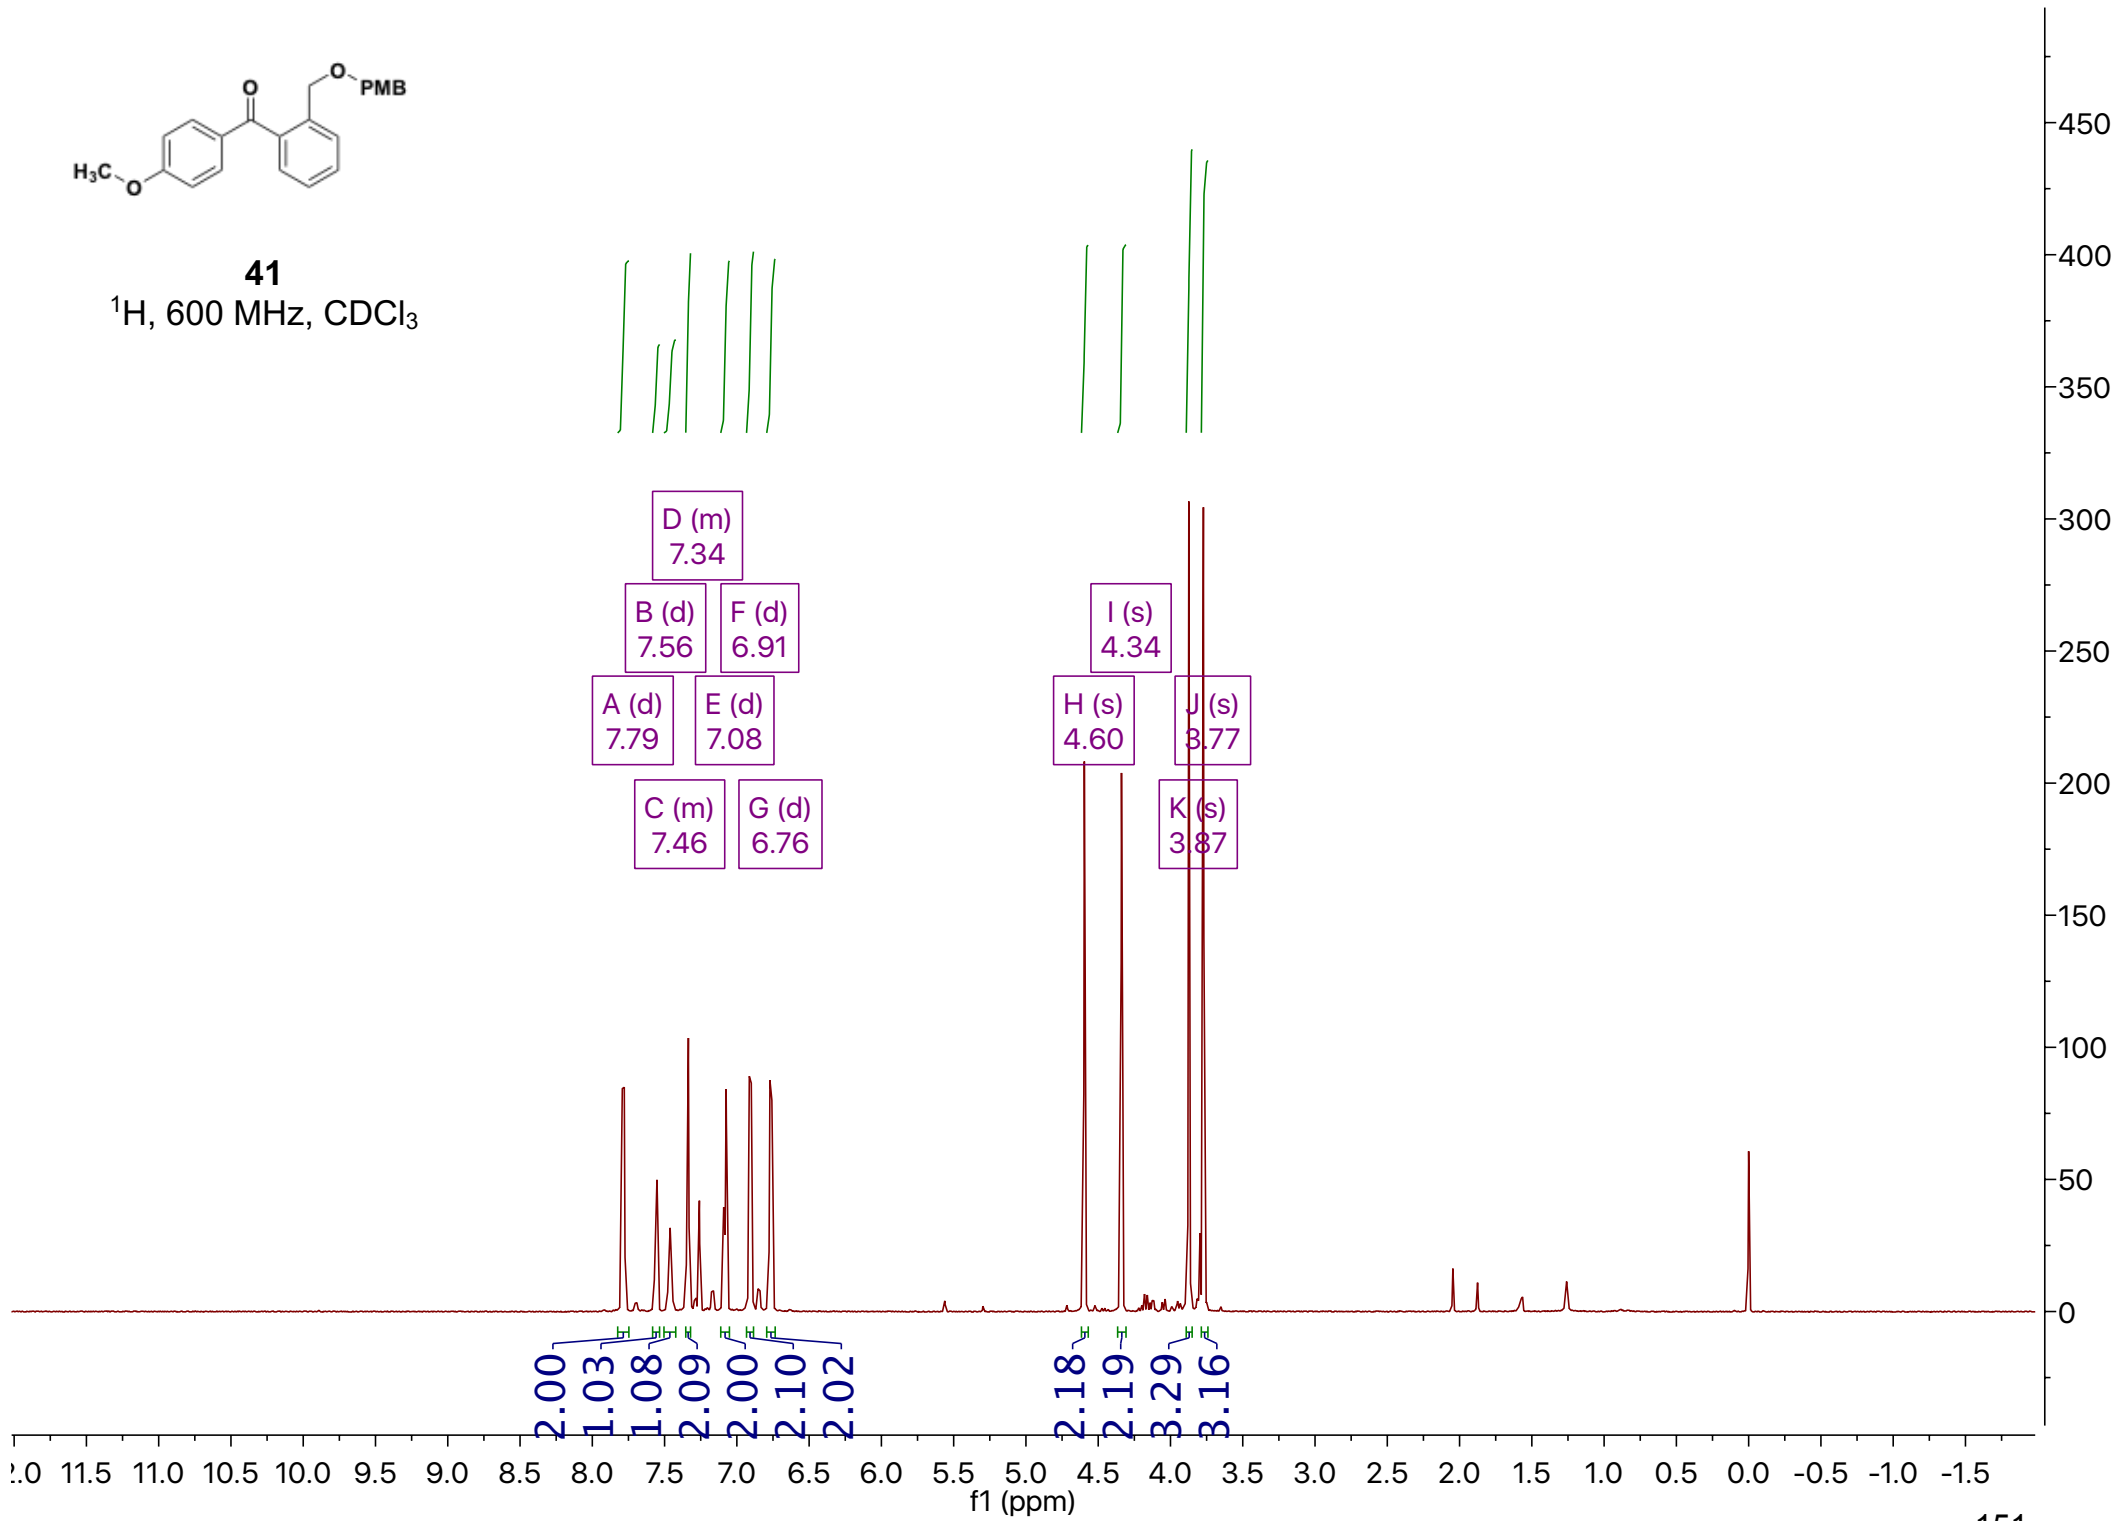

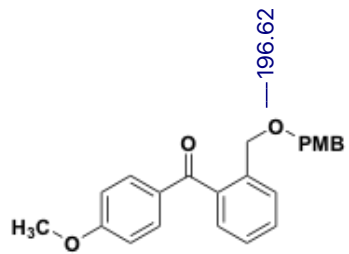

**41**

$^{13}\text{C}$ , 150 MHz,  $\text{CDCl}_3$

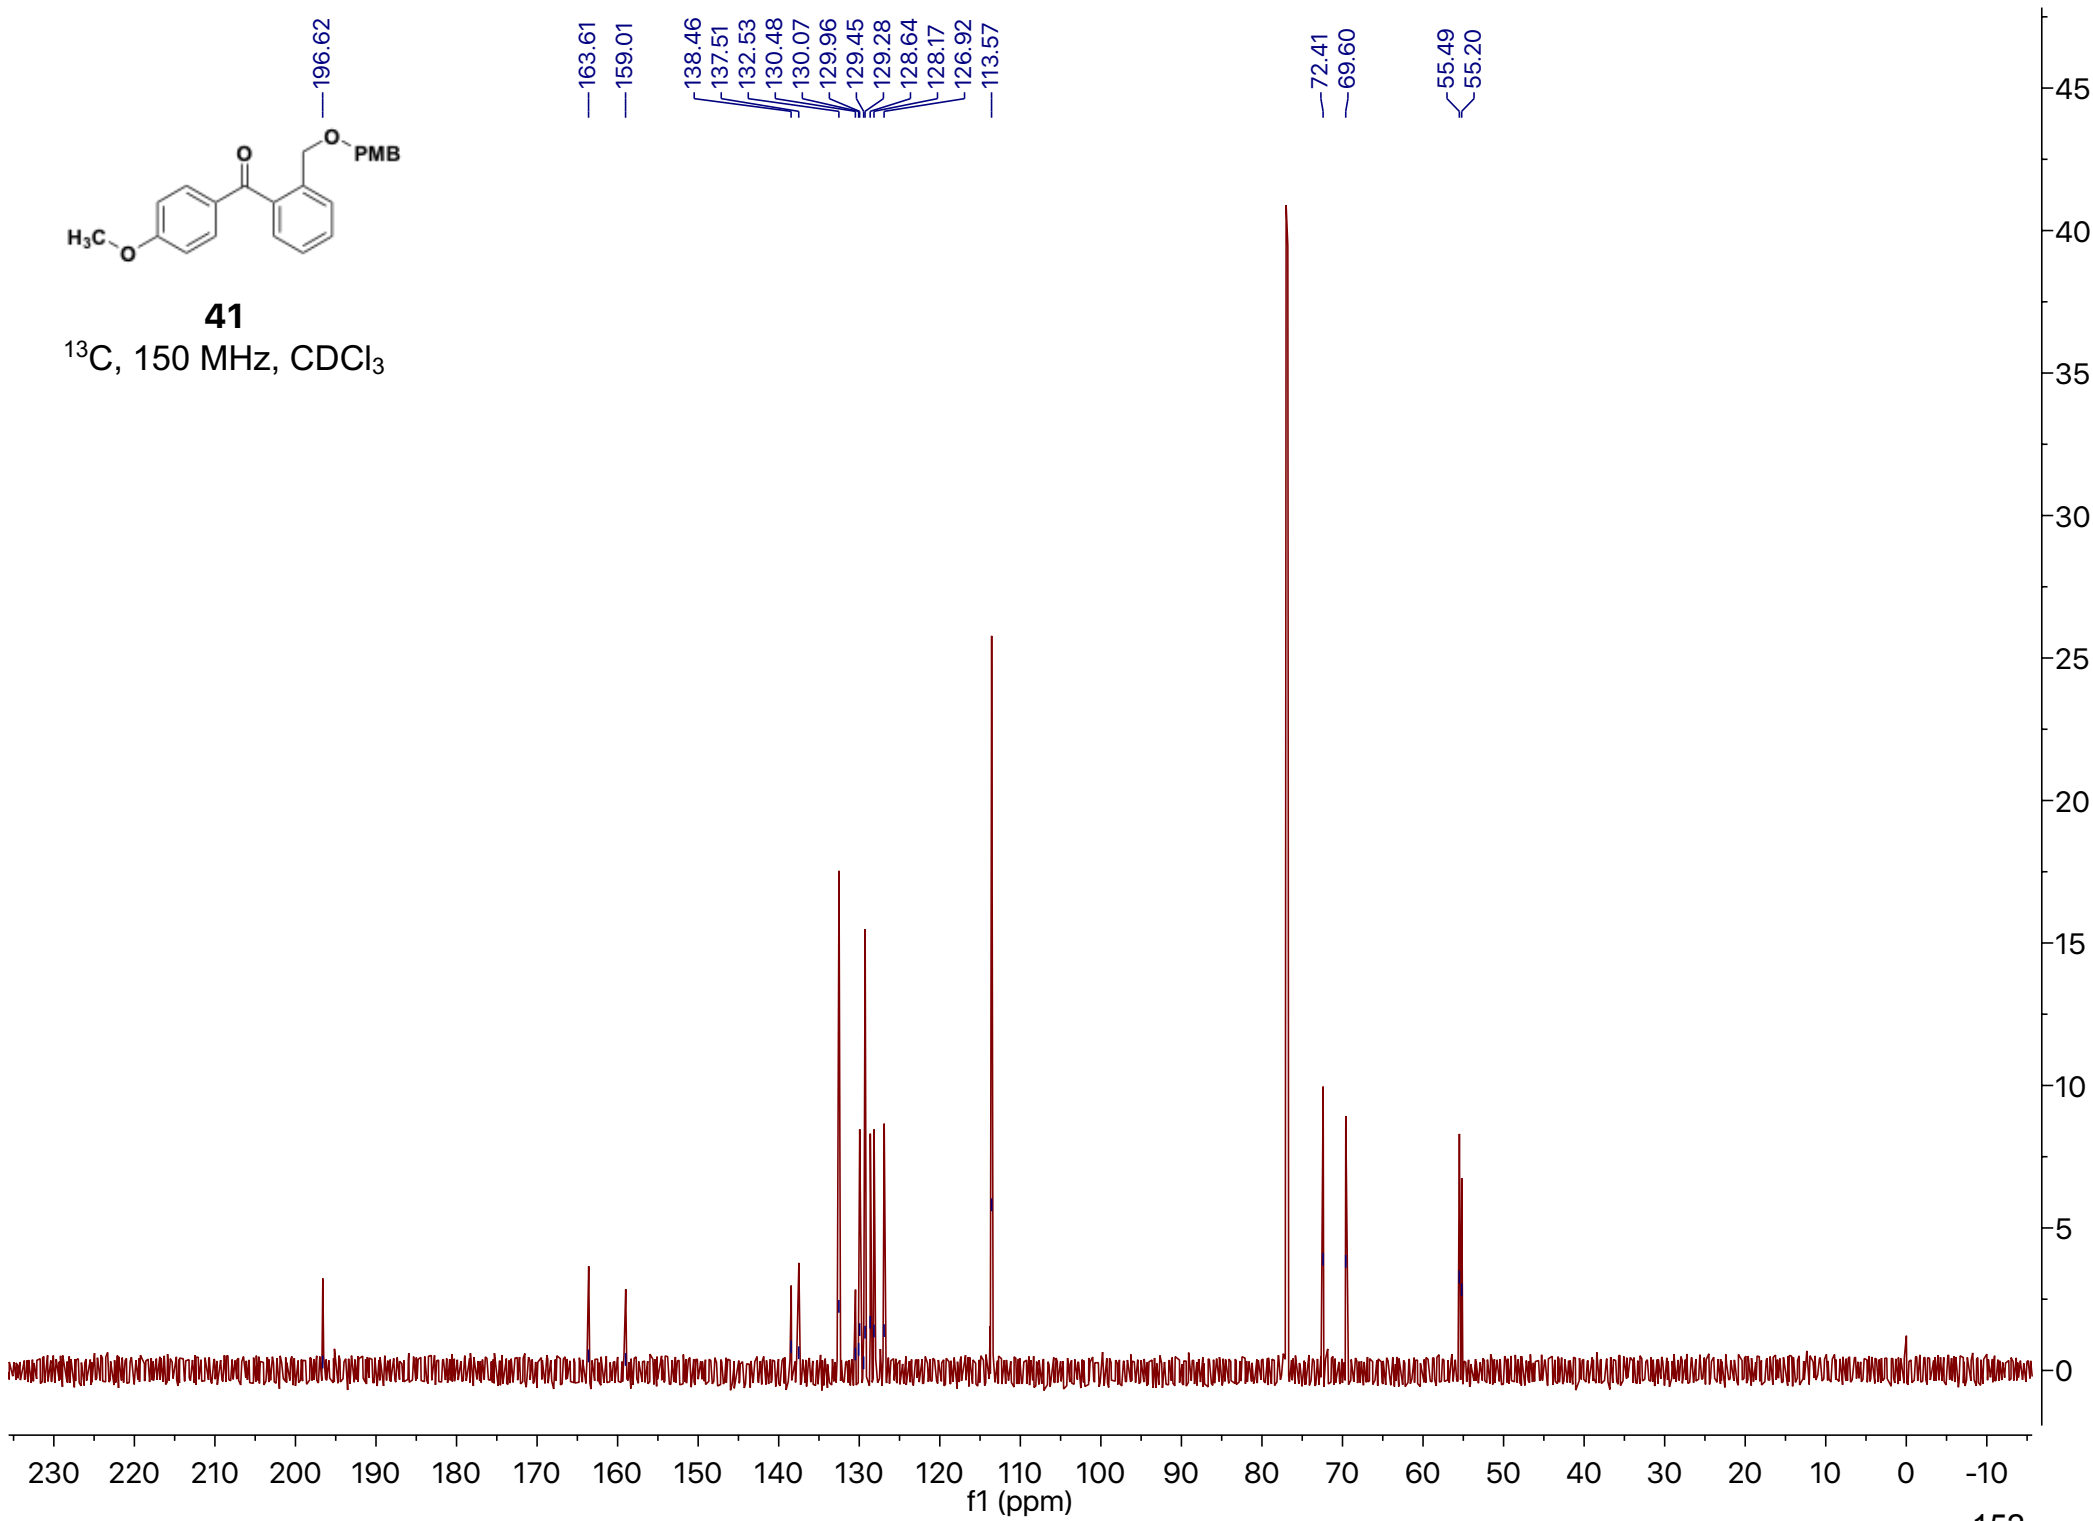

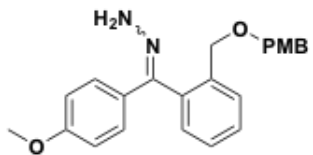

**10d**

$^1\text{H}$ , 400 MHz,  $\text{CDCl}_3$

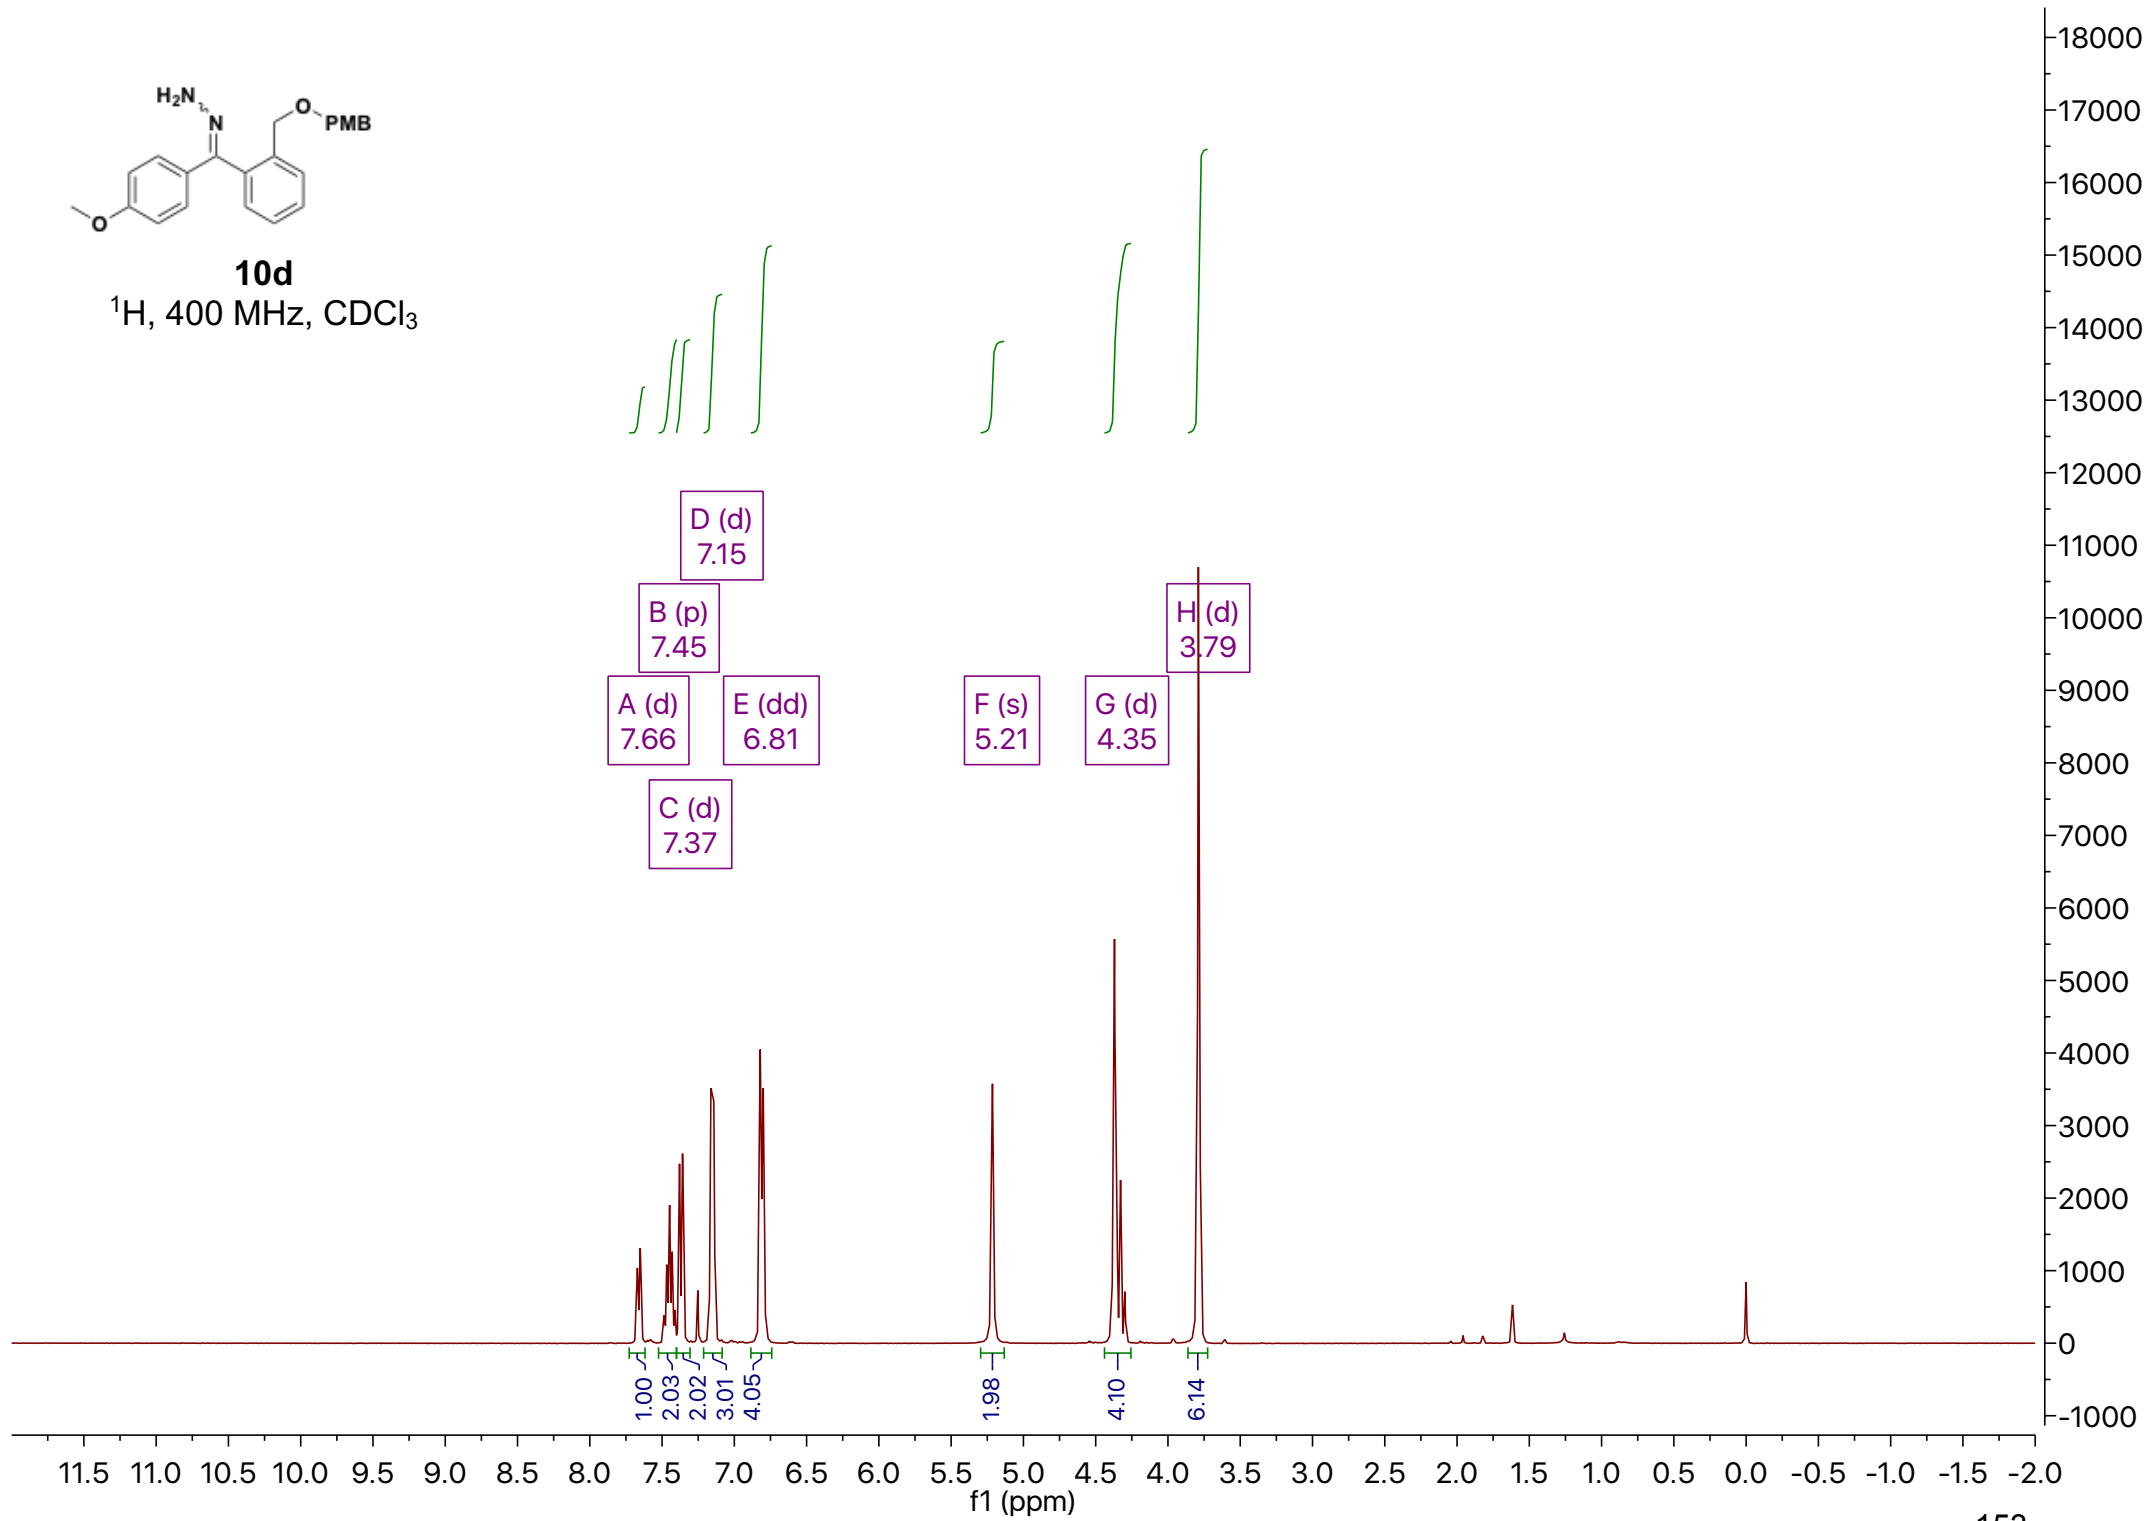

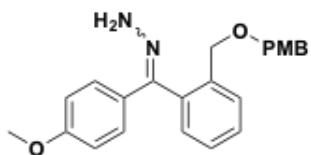

**10d**

$^{13}\text{C}$ , 150 MHz,  $\text{CDCl}_3$

159.75  
159.13  
148.51  
137.24  
132.37  
130.84  
130.16  
129.37  
129.22  
129.20  
128.76  
128.68  
127.35  
113.68  
113.64

72.59  
69.75

55.26  
55.23

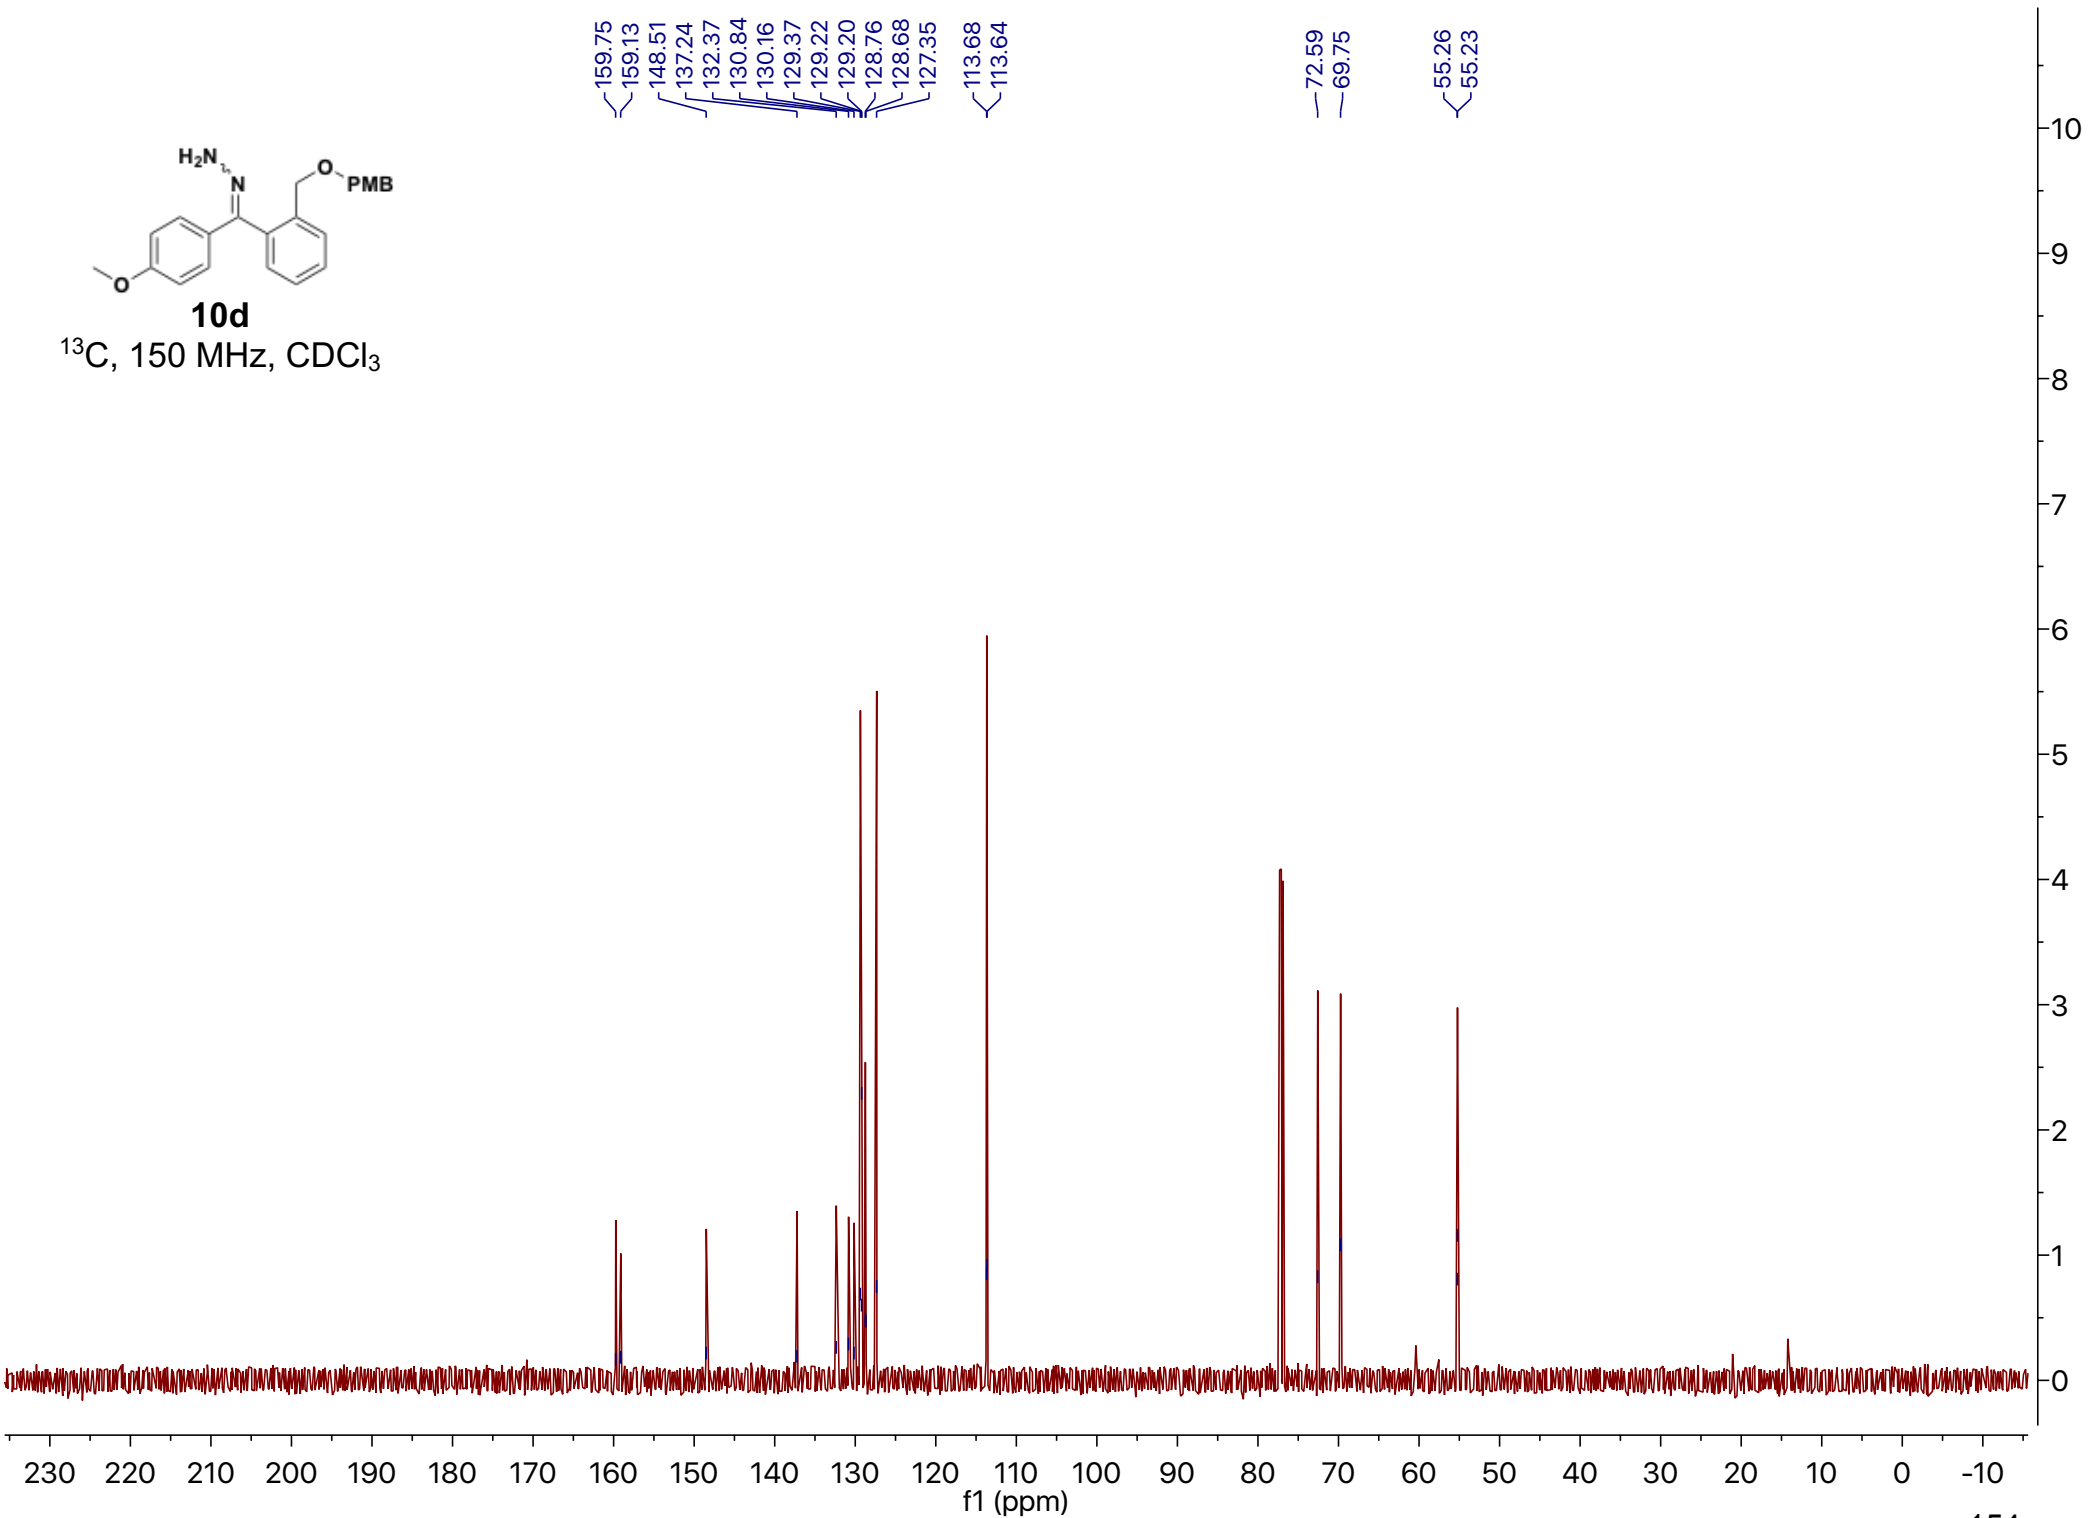



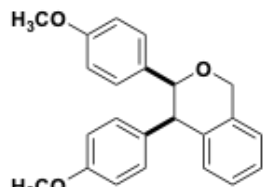

**11d**

$^1\text{H}$ , 600 MHz,  $\text{CDCl}_3$

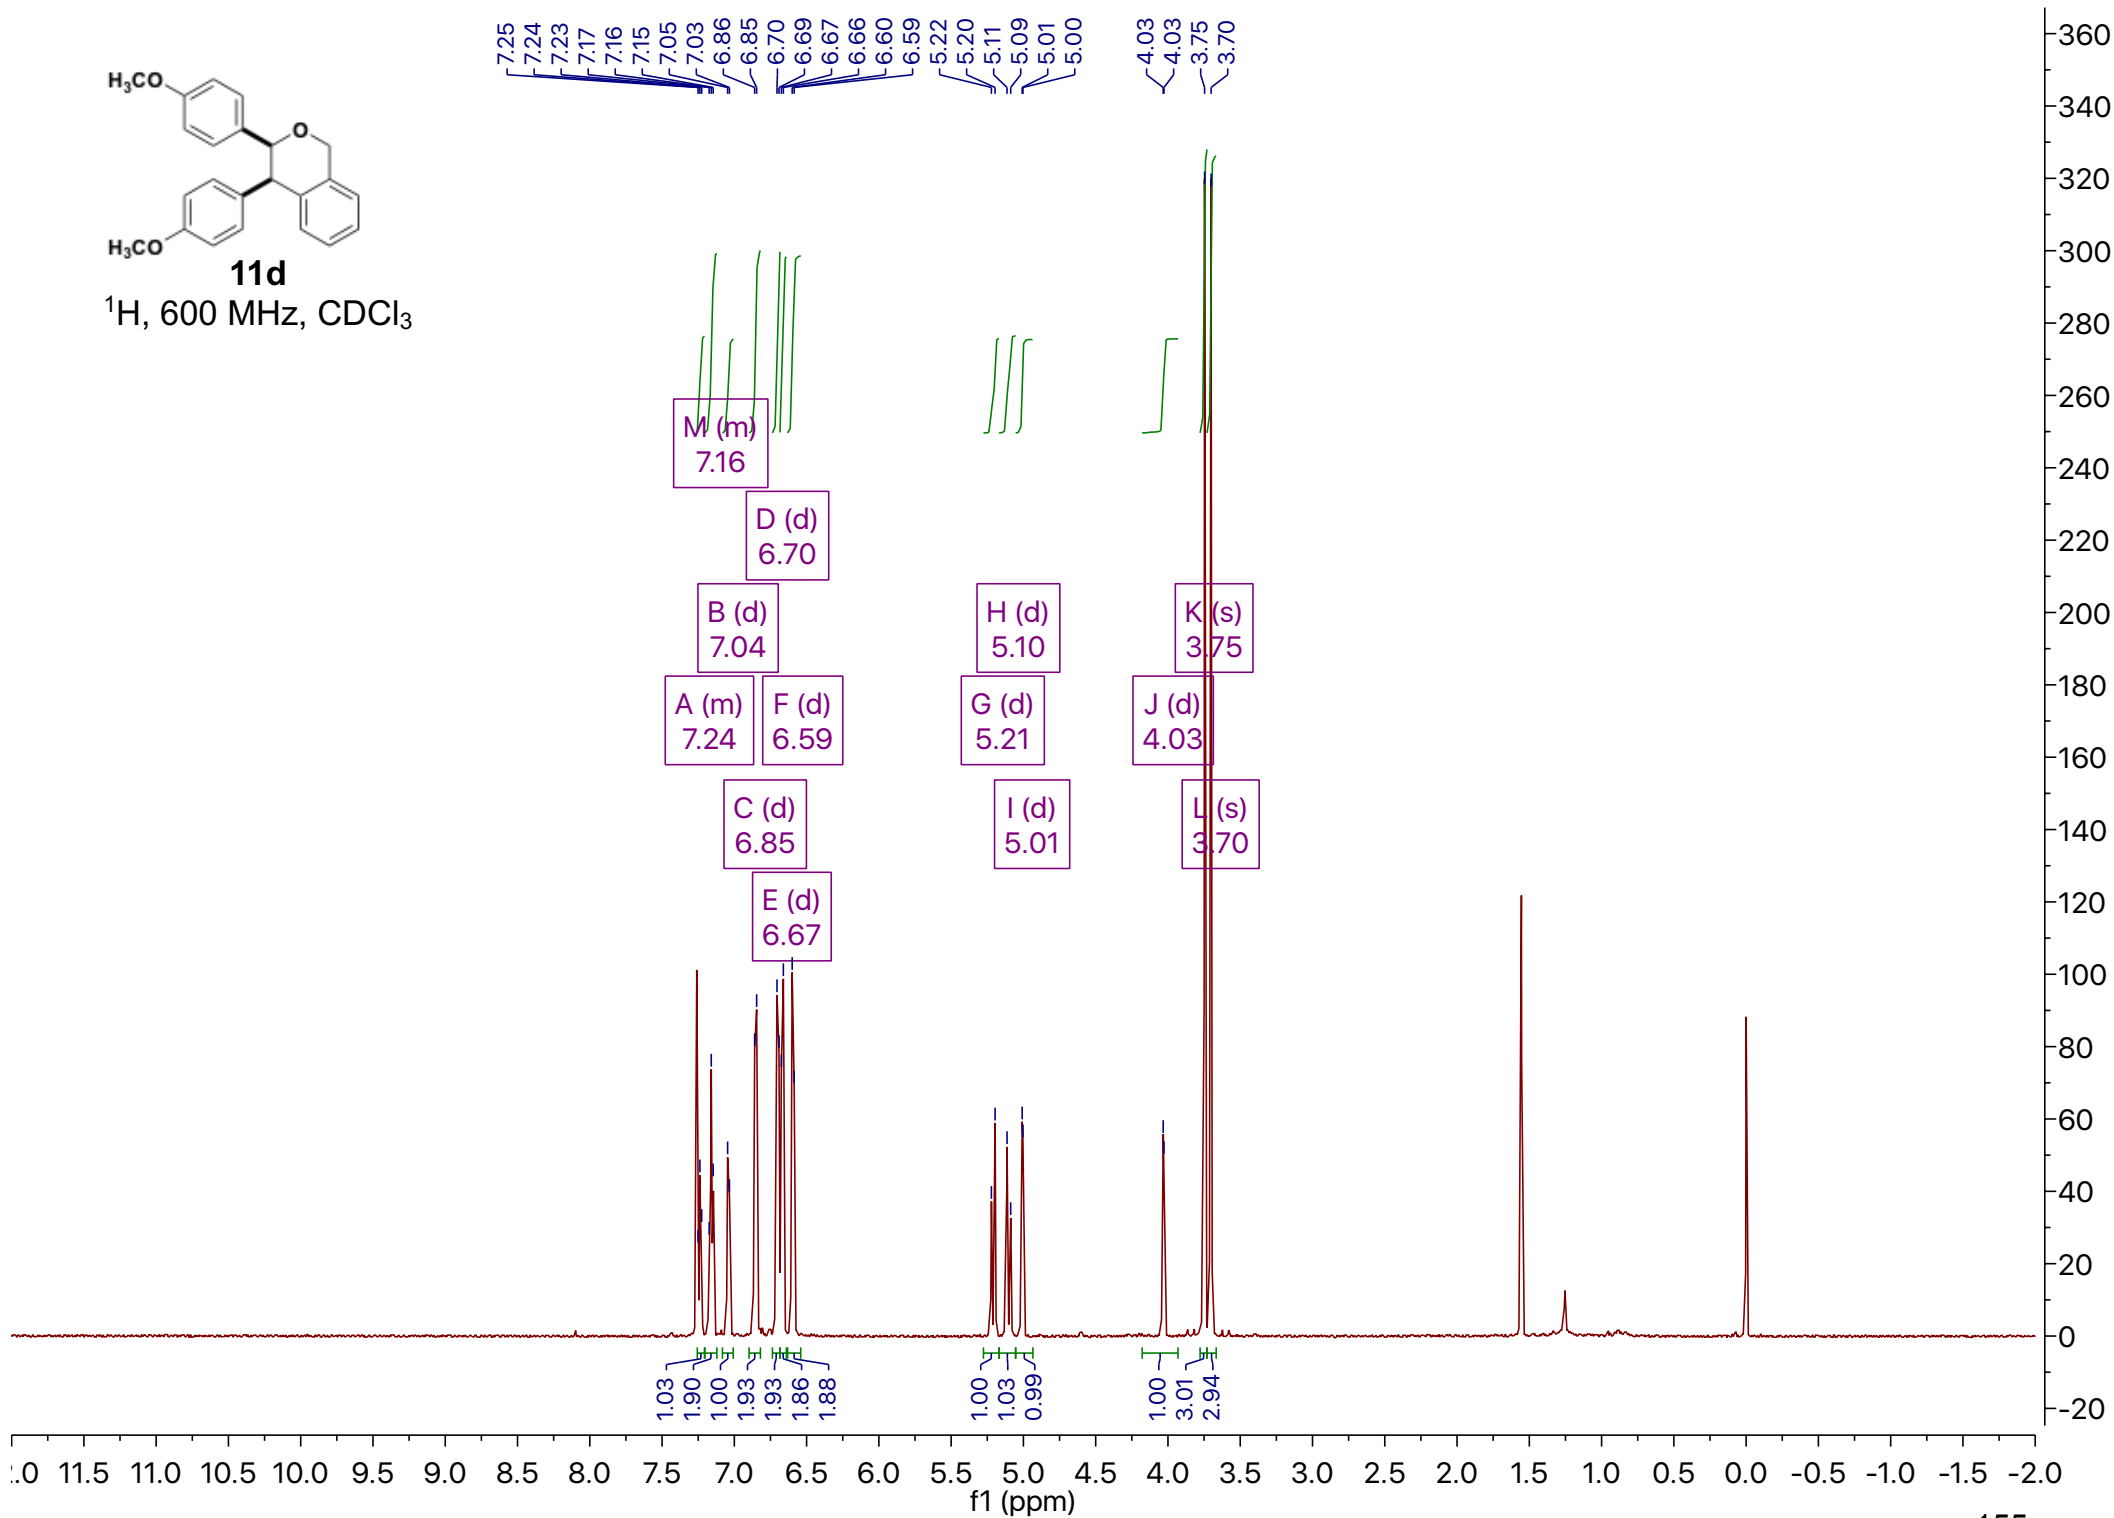

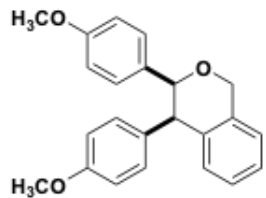

**11d**

$^{13}\text{C}$ , 150 MHz,  $\text{CDCl}_3$

158.41  
157.84  
137.56  
134.16  
133.10  
132.57  
131.04  
130.18  
127.22  
126.79  
126.50  
124.01  
113.03  
112.70

79.81

69.14

55.16

55.06

49.51

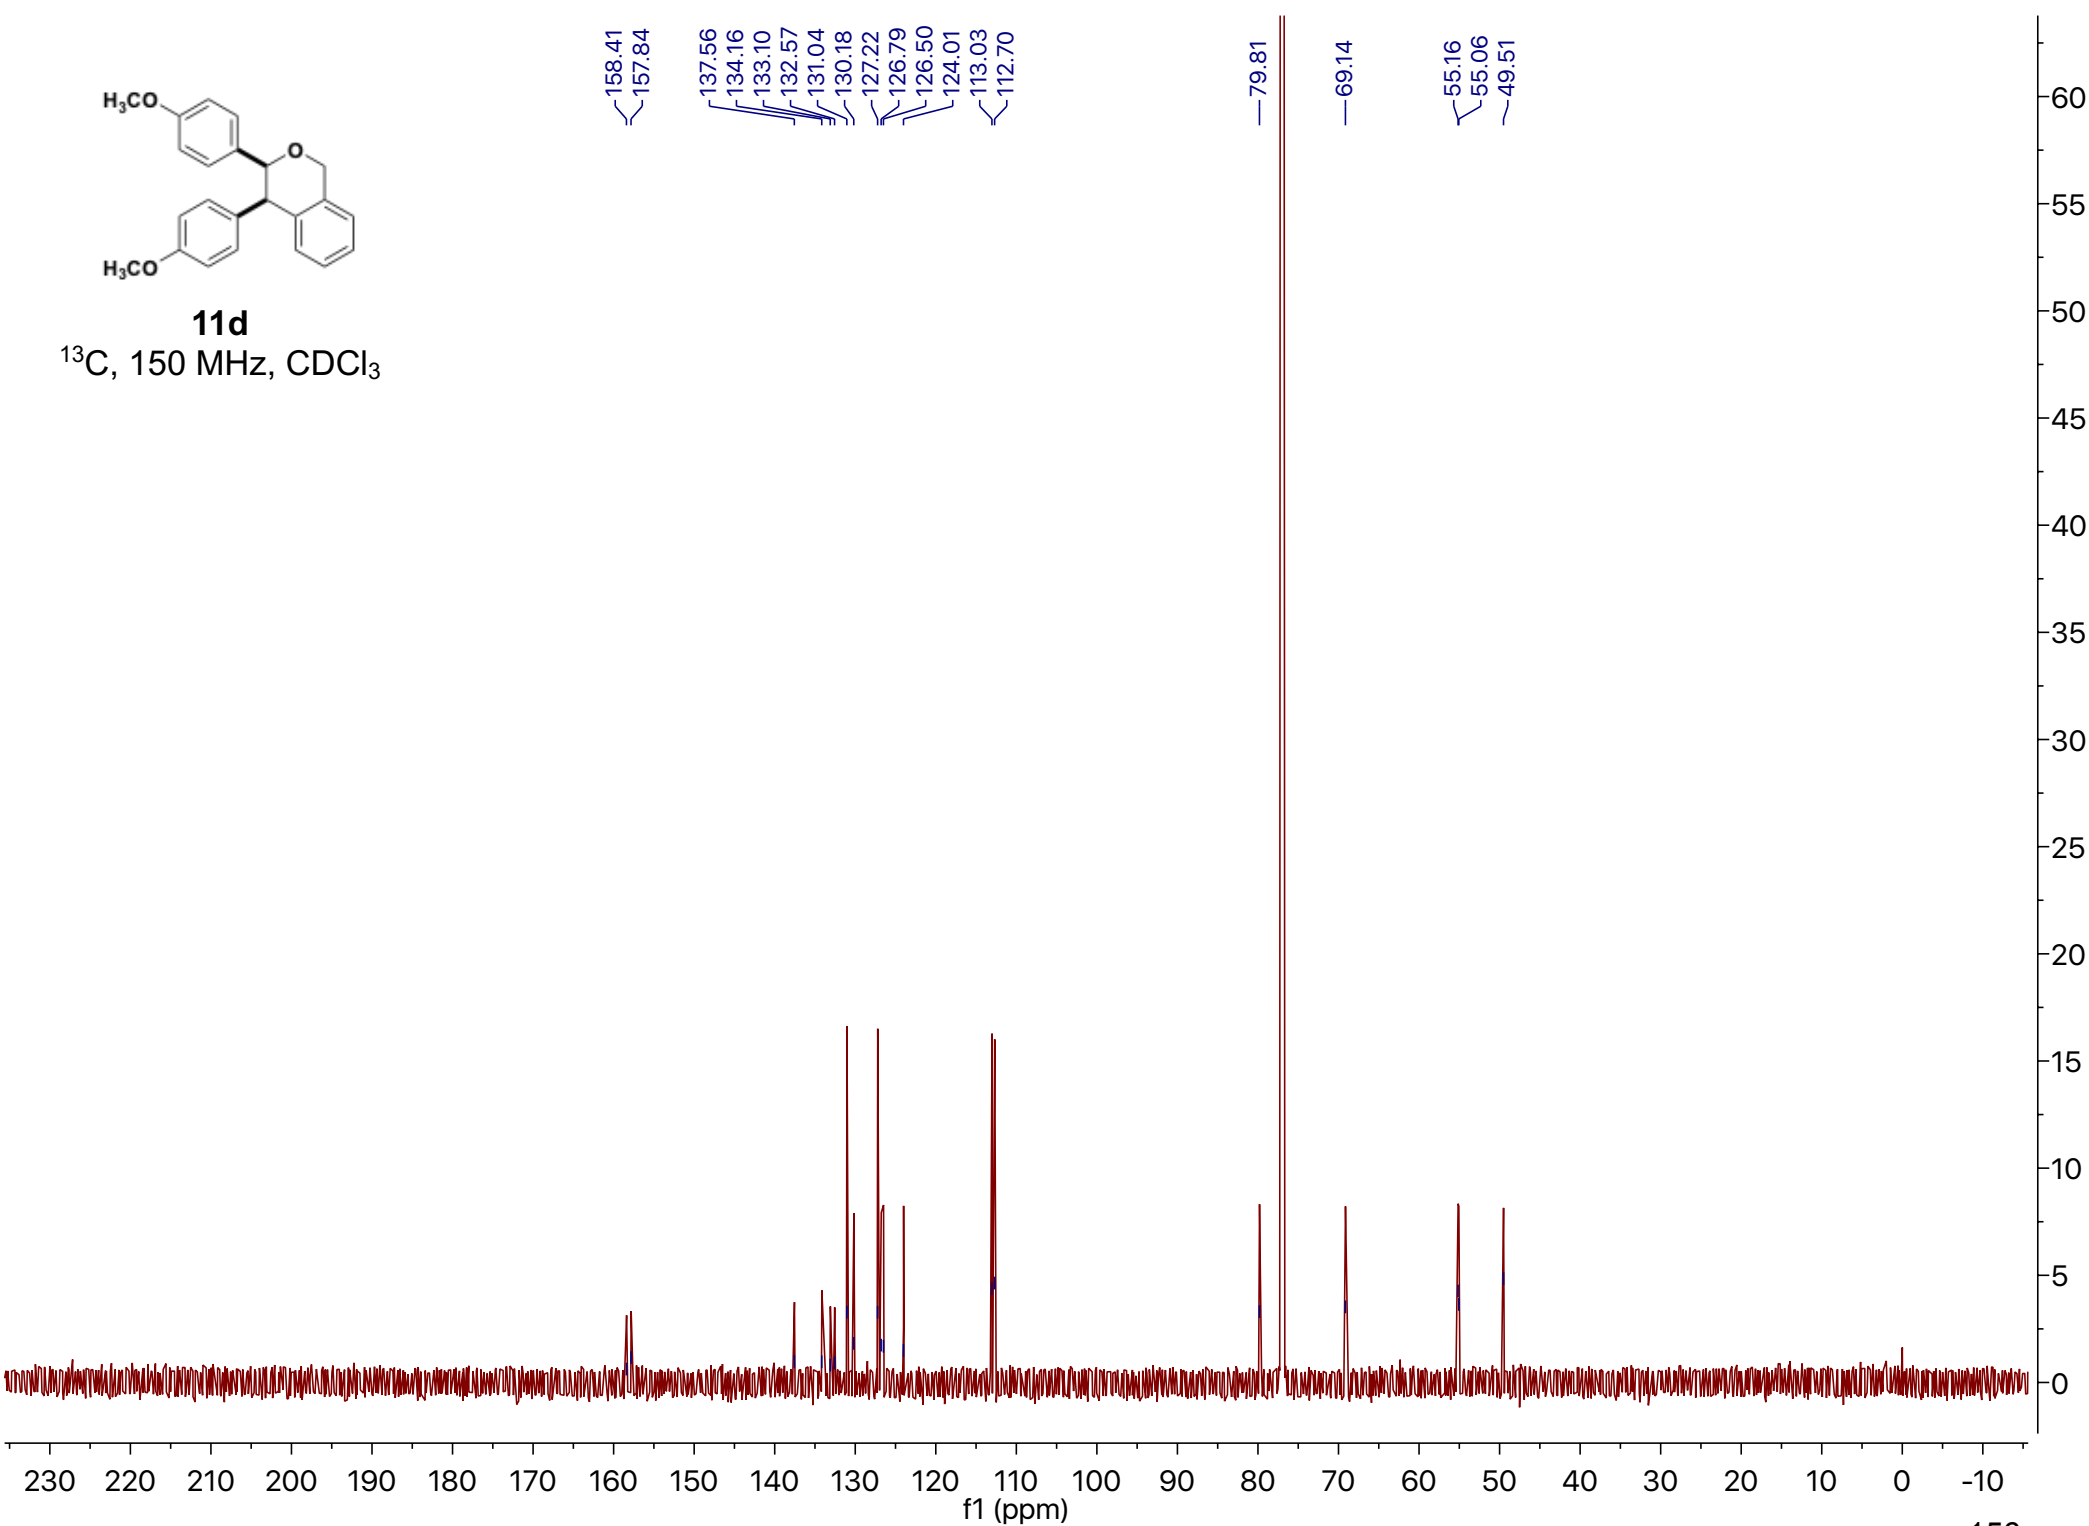

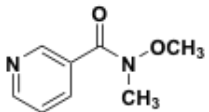

**42**

<sup>1</sup>H, 600 MHz, CDCl<sub>3</sub>

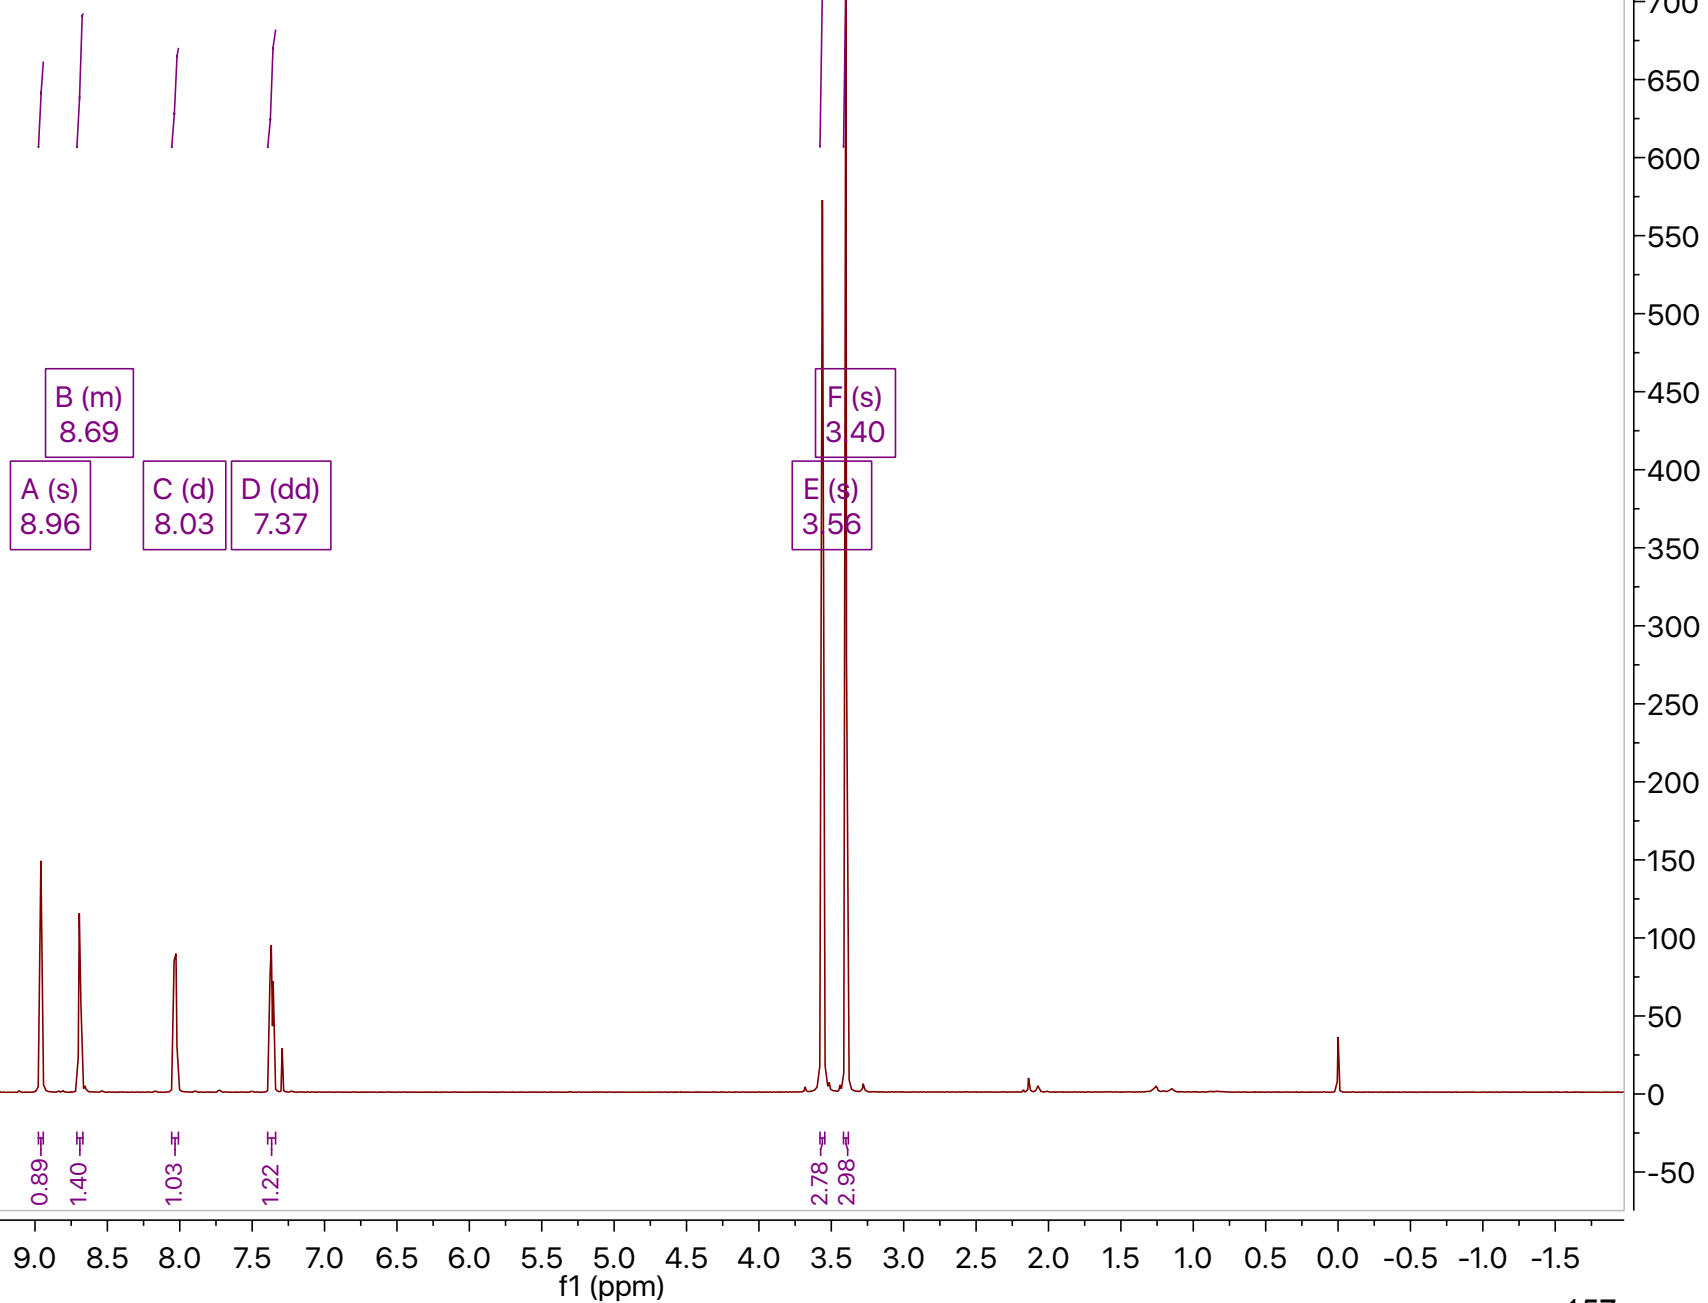

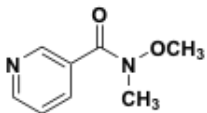

**42**

$^{13}\text{C}$ , 150 MHz,  $\text{CDCl}_3$

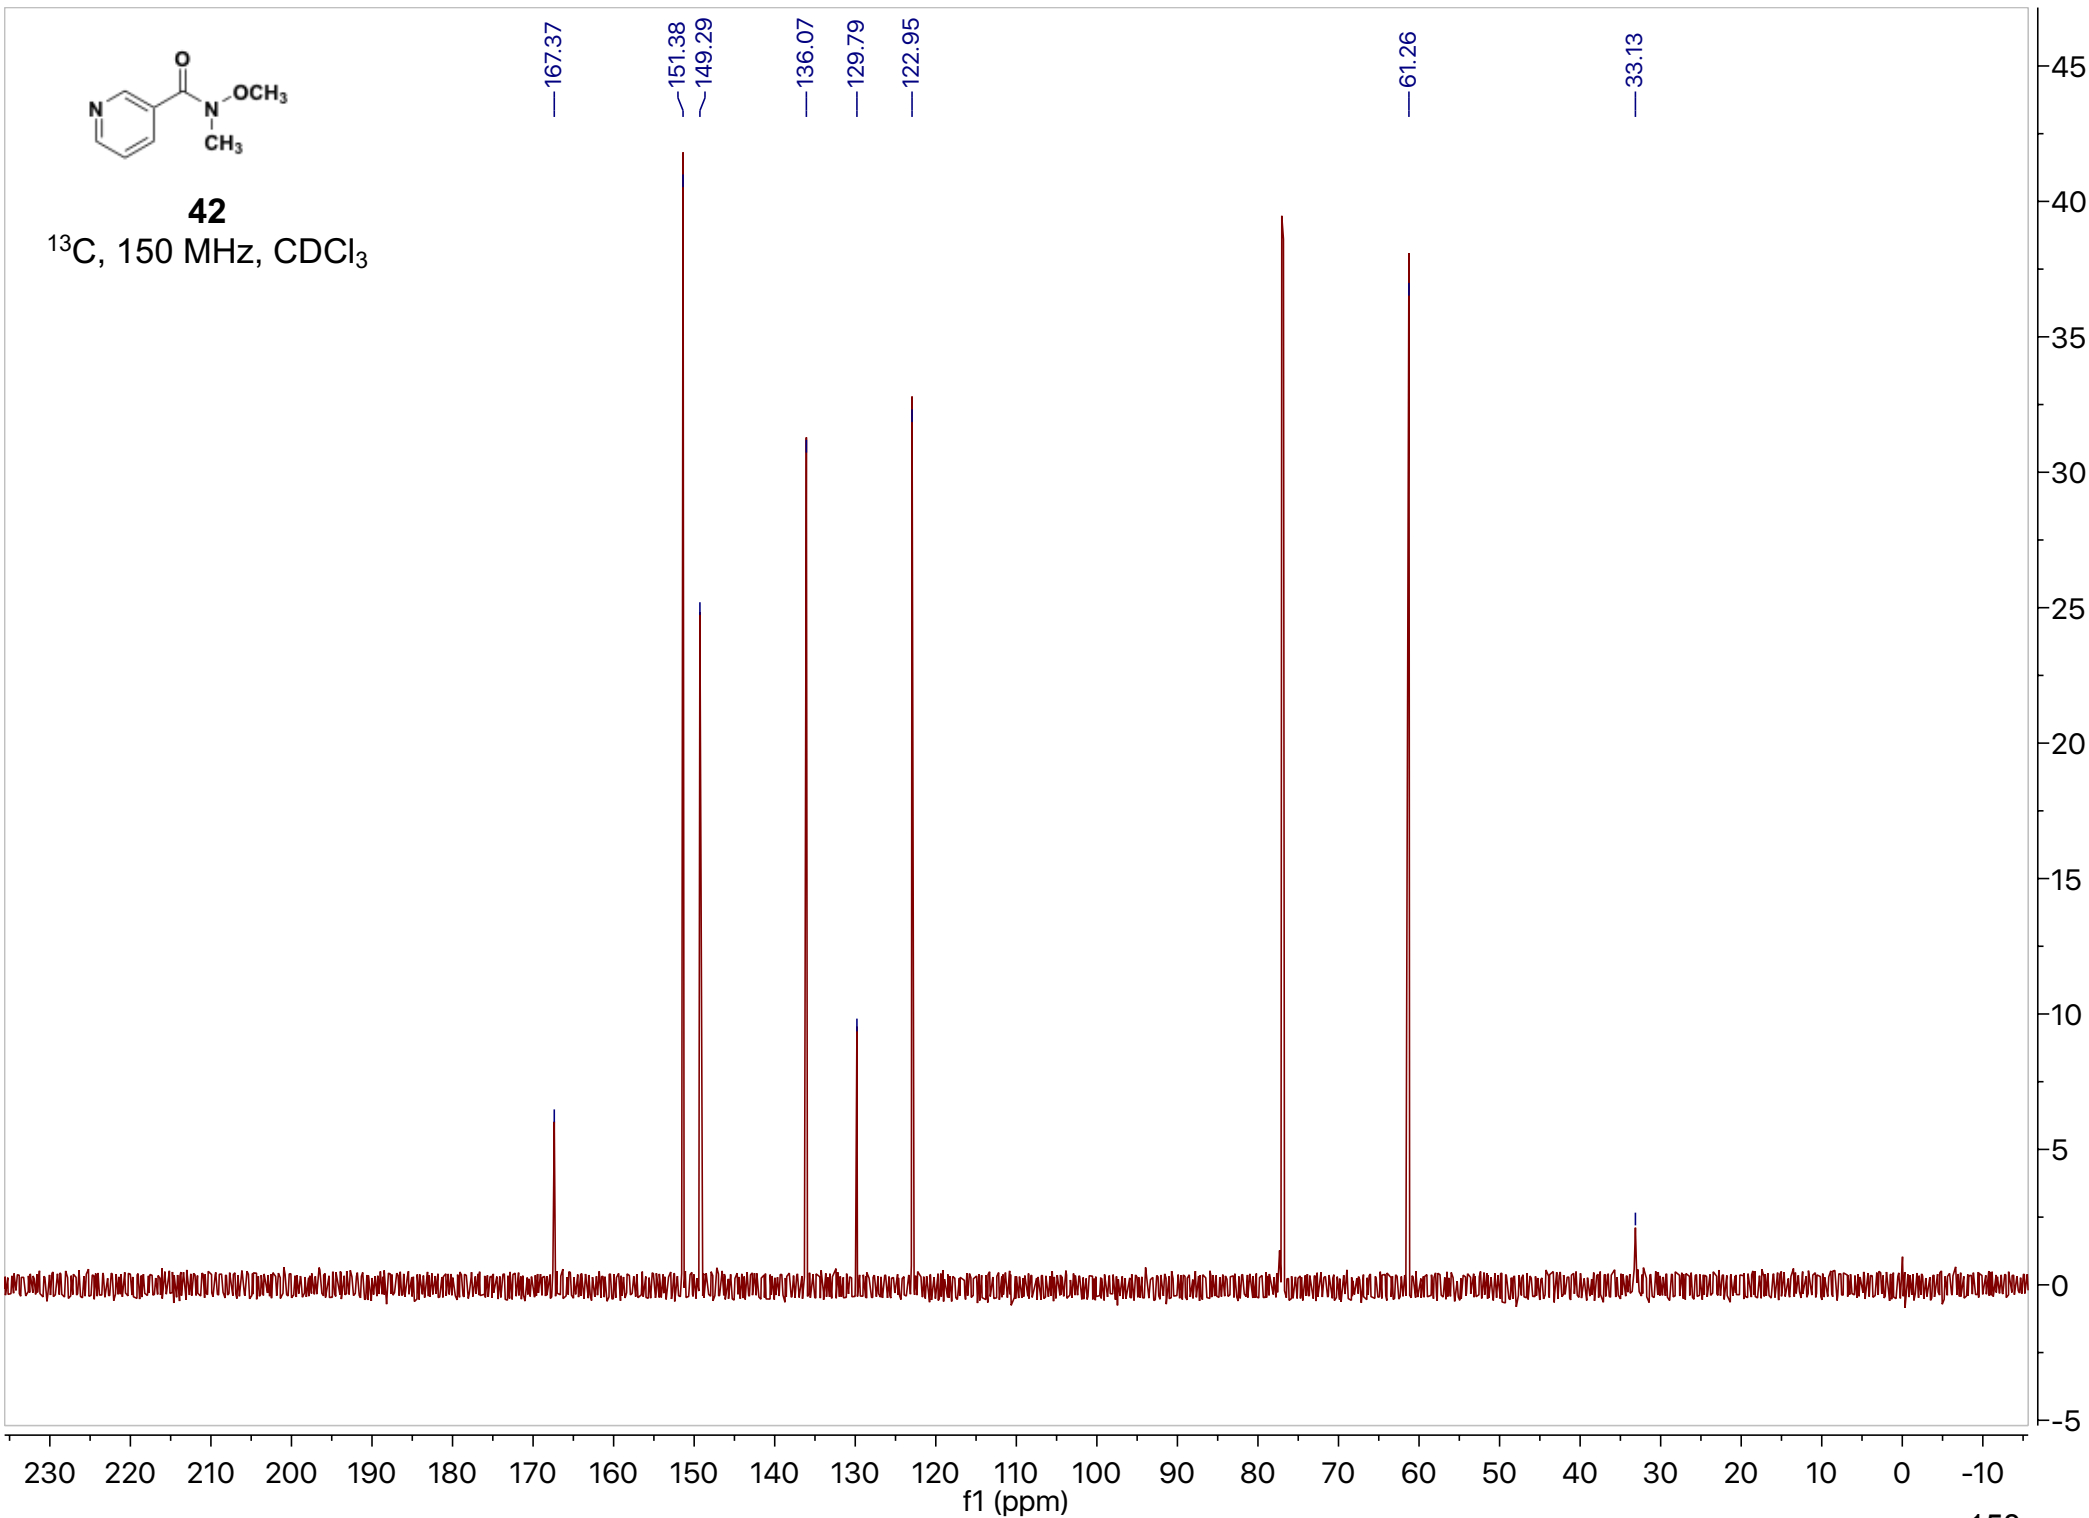

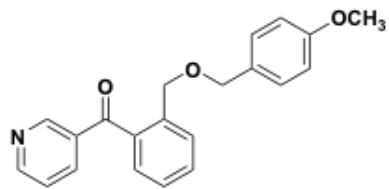

**43**

<sup>1</sup>H, 600 MHz, CDCl<sub>3</sub>

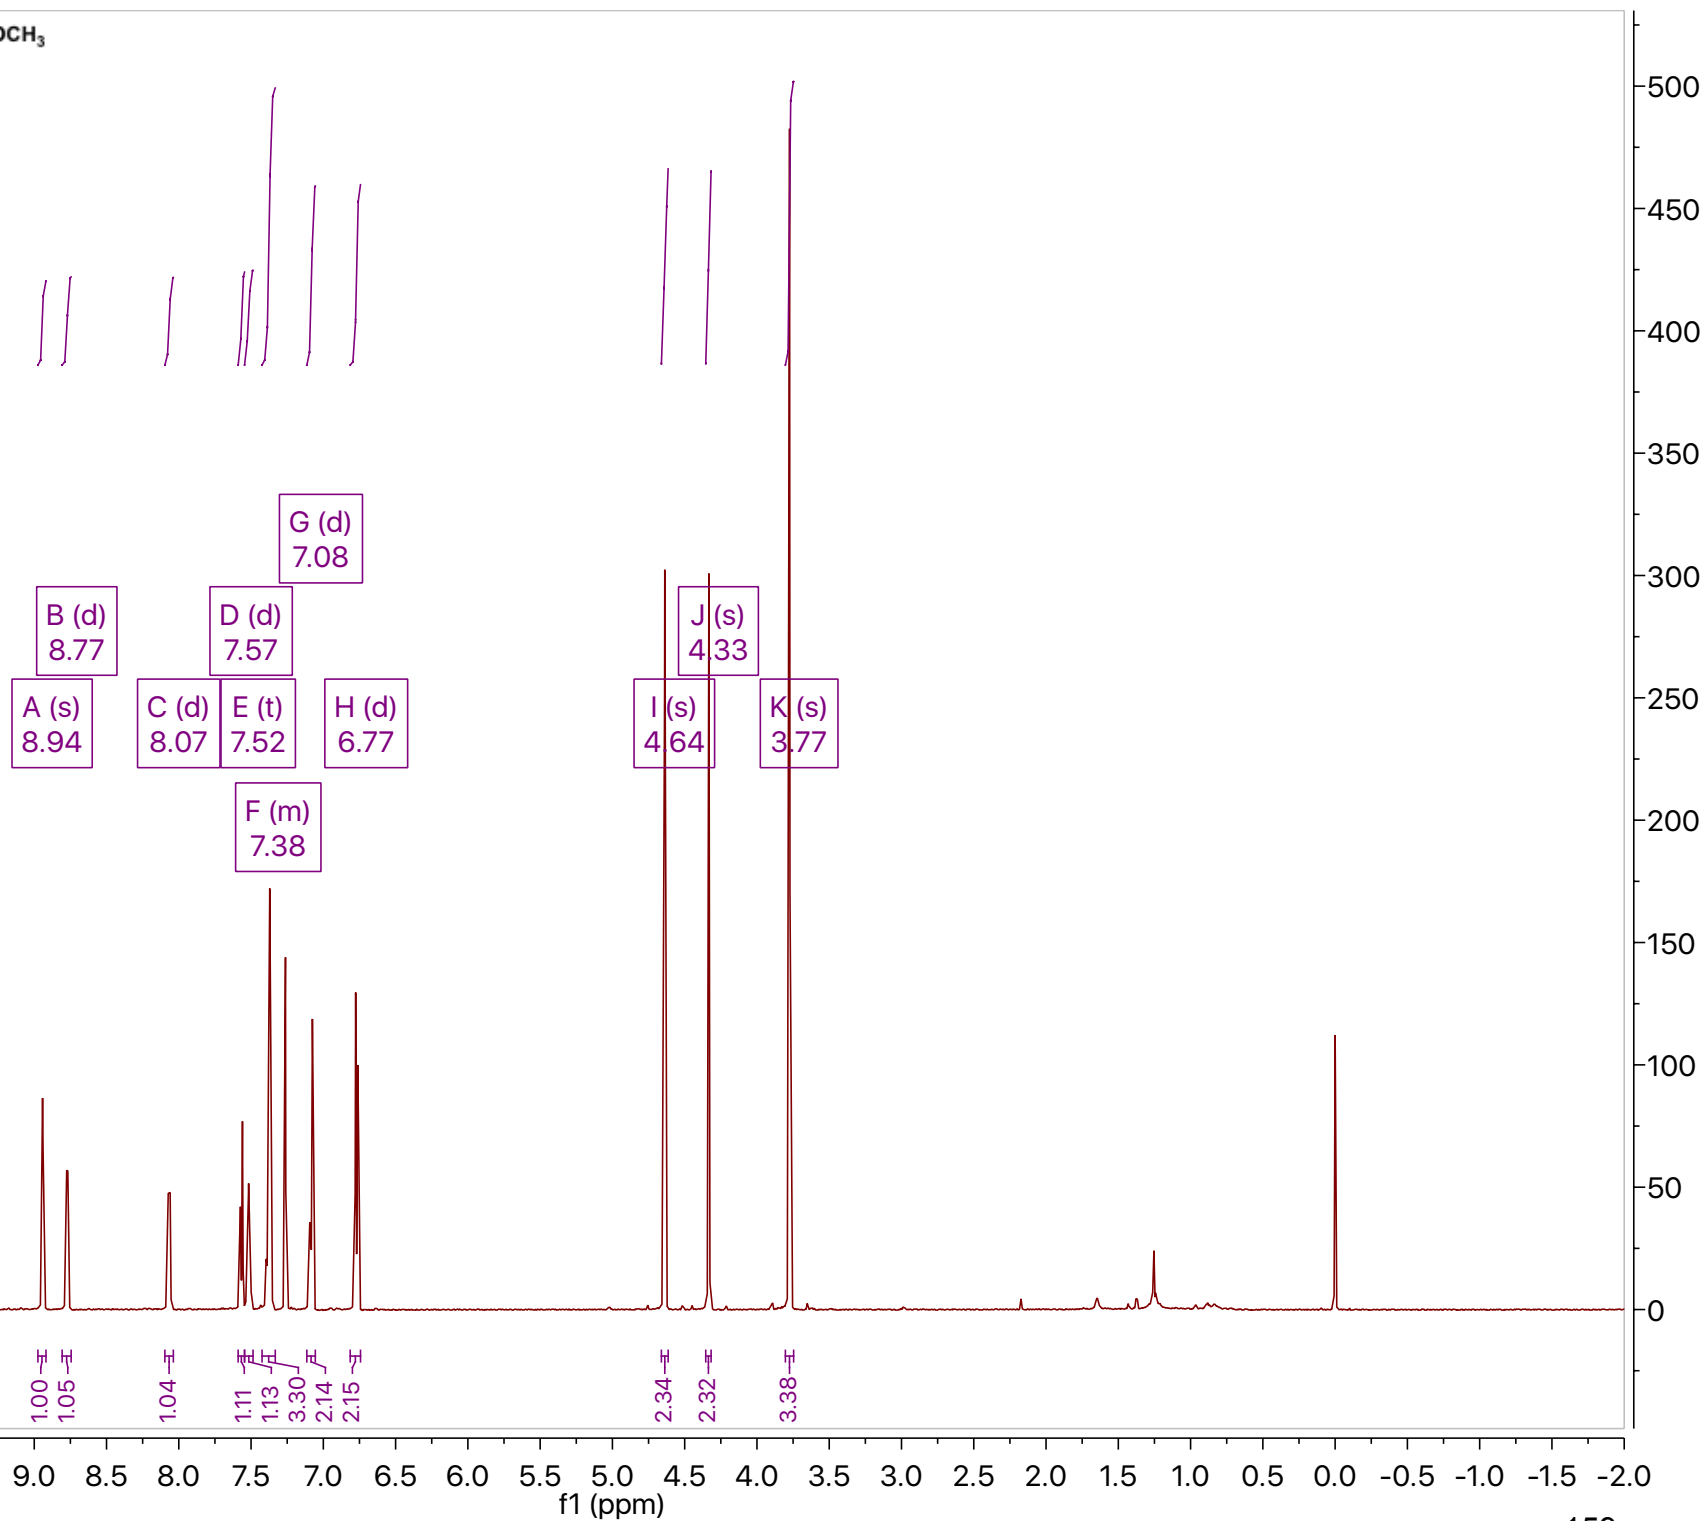

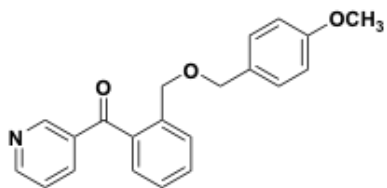

**43**

$^{13}\text{C}$ , 150 MHz,  $\text{CDCl}_3$

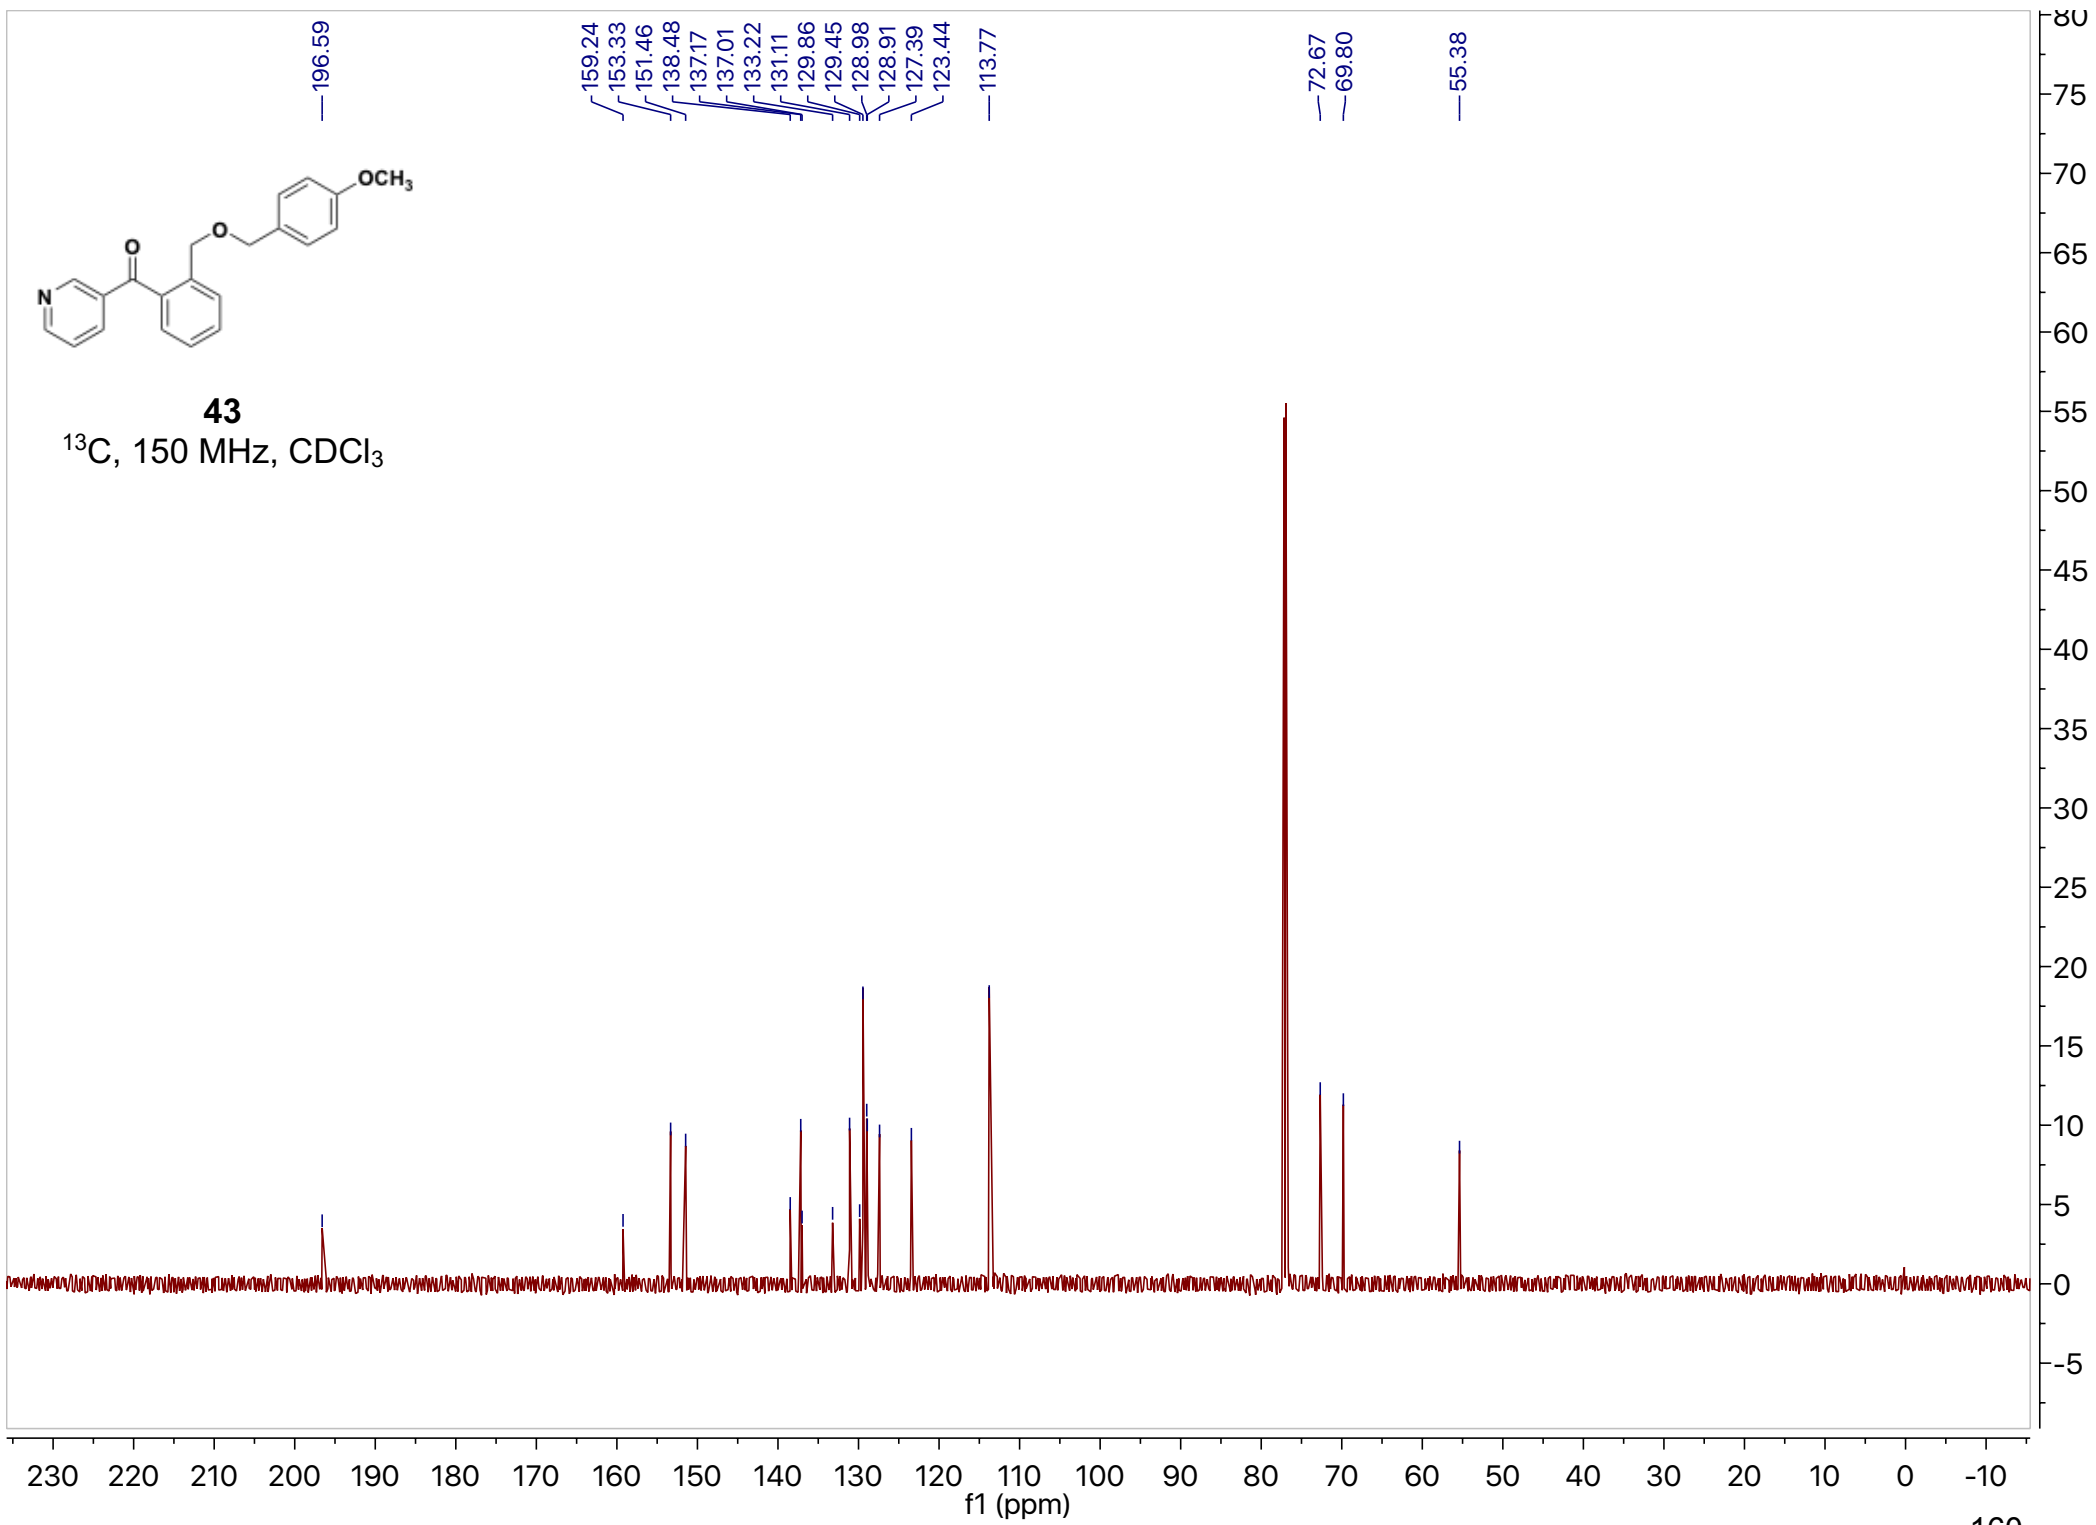

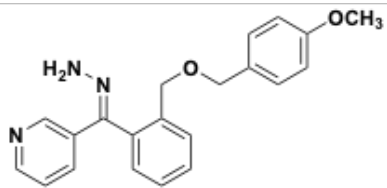

**10e**

$^1\text{H}$ , 600 MHz,  $\text{CDCl}_3$

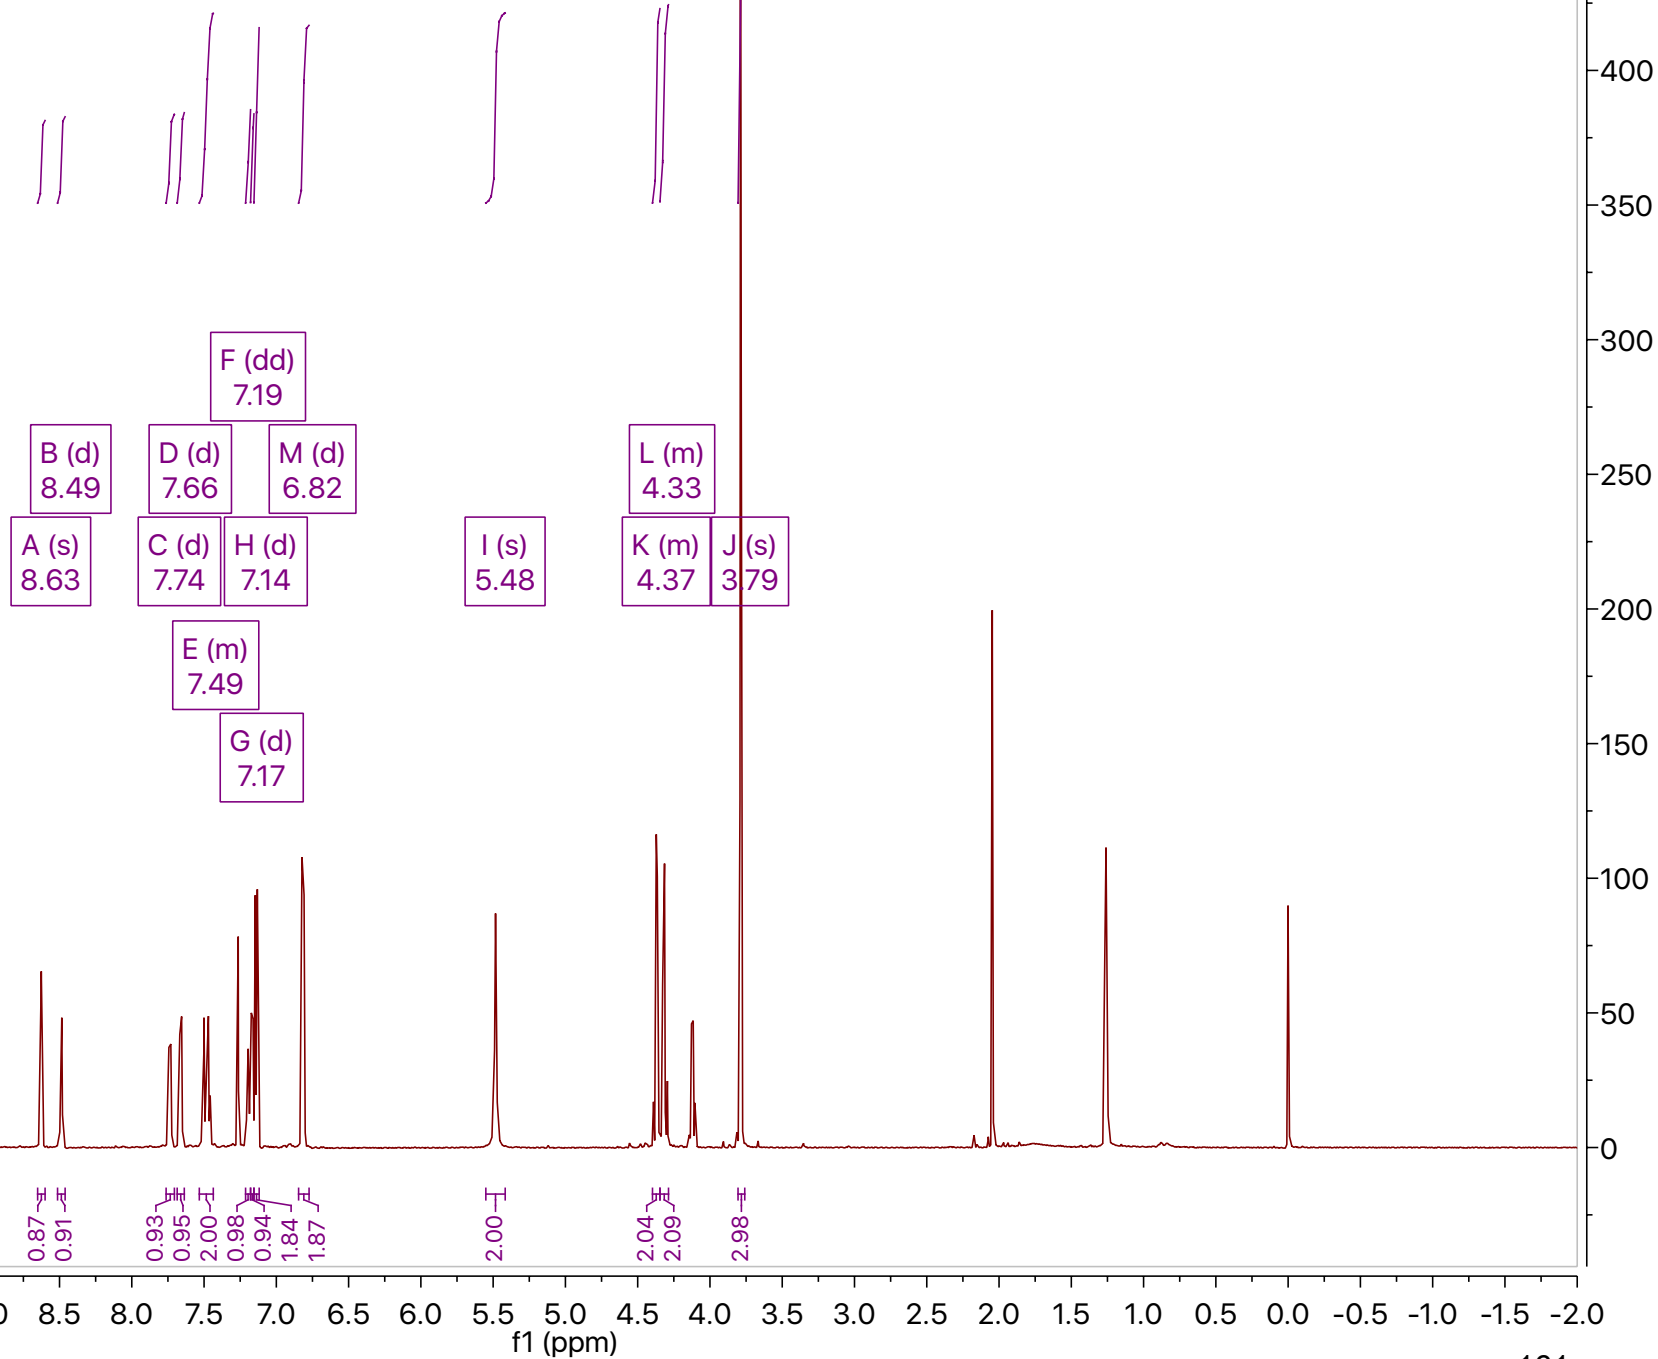

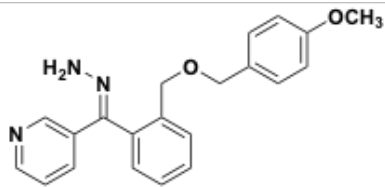

**10e**

$^{13}\text{C}$ , 150 MHz,  $\text{CDCl}_3$

159.30  
148.96  
147.68  
145.50  
137.43  
133.82  
133.00  
131.18  
130.01  
129.84  
129.51  
129.20  
128.95  
123.23  
113.85

72.77  
69.87

55.40

14.34

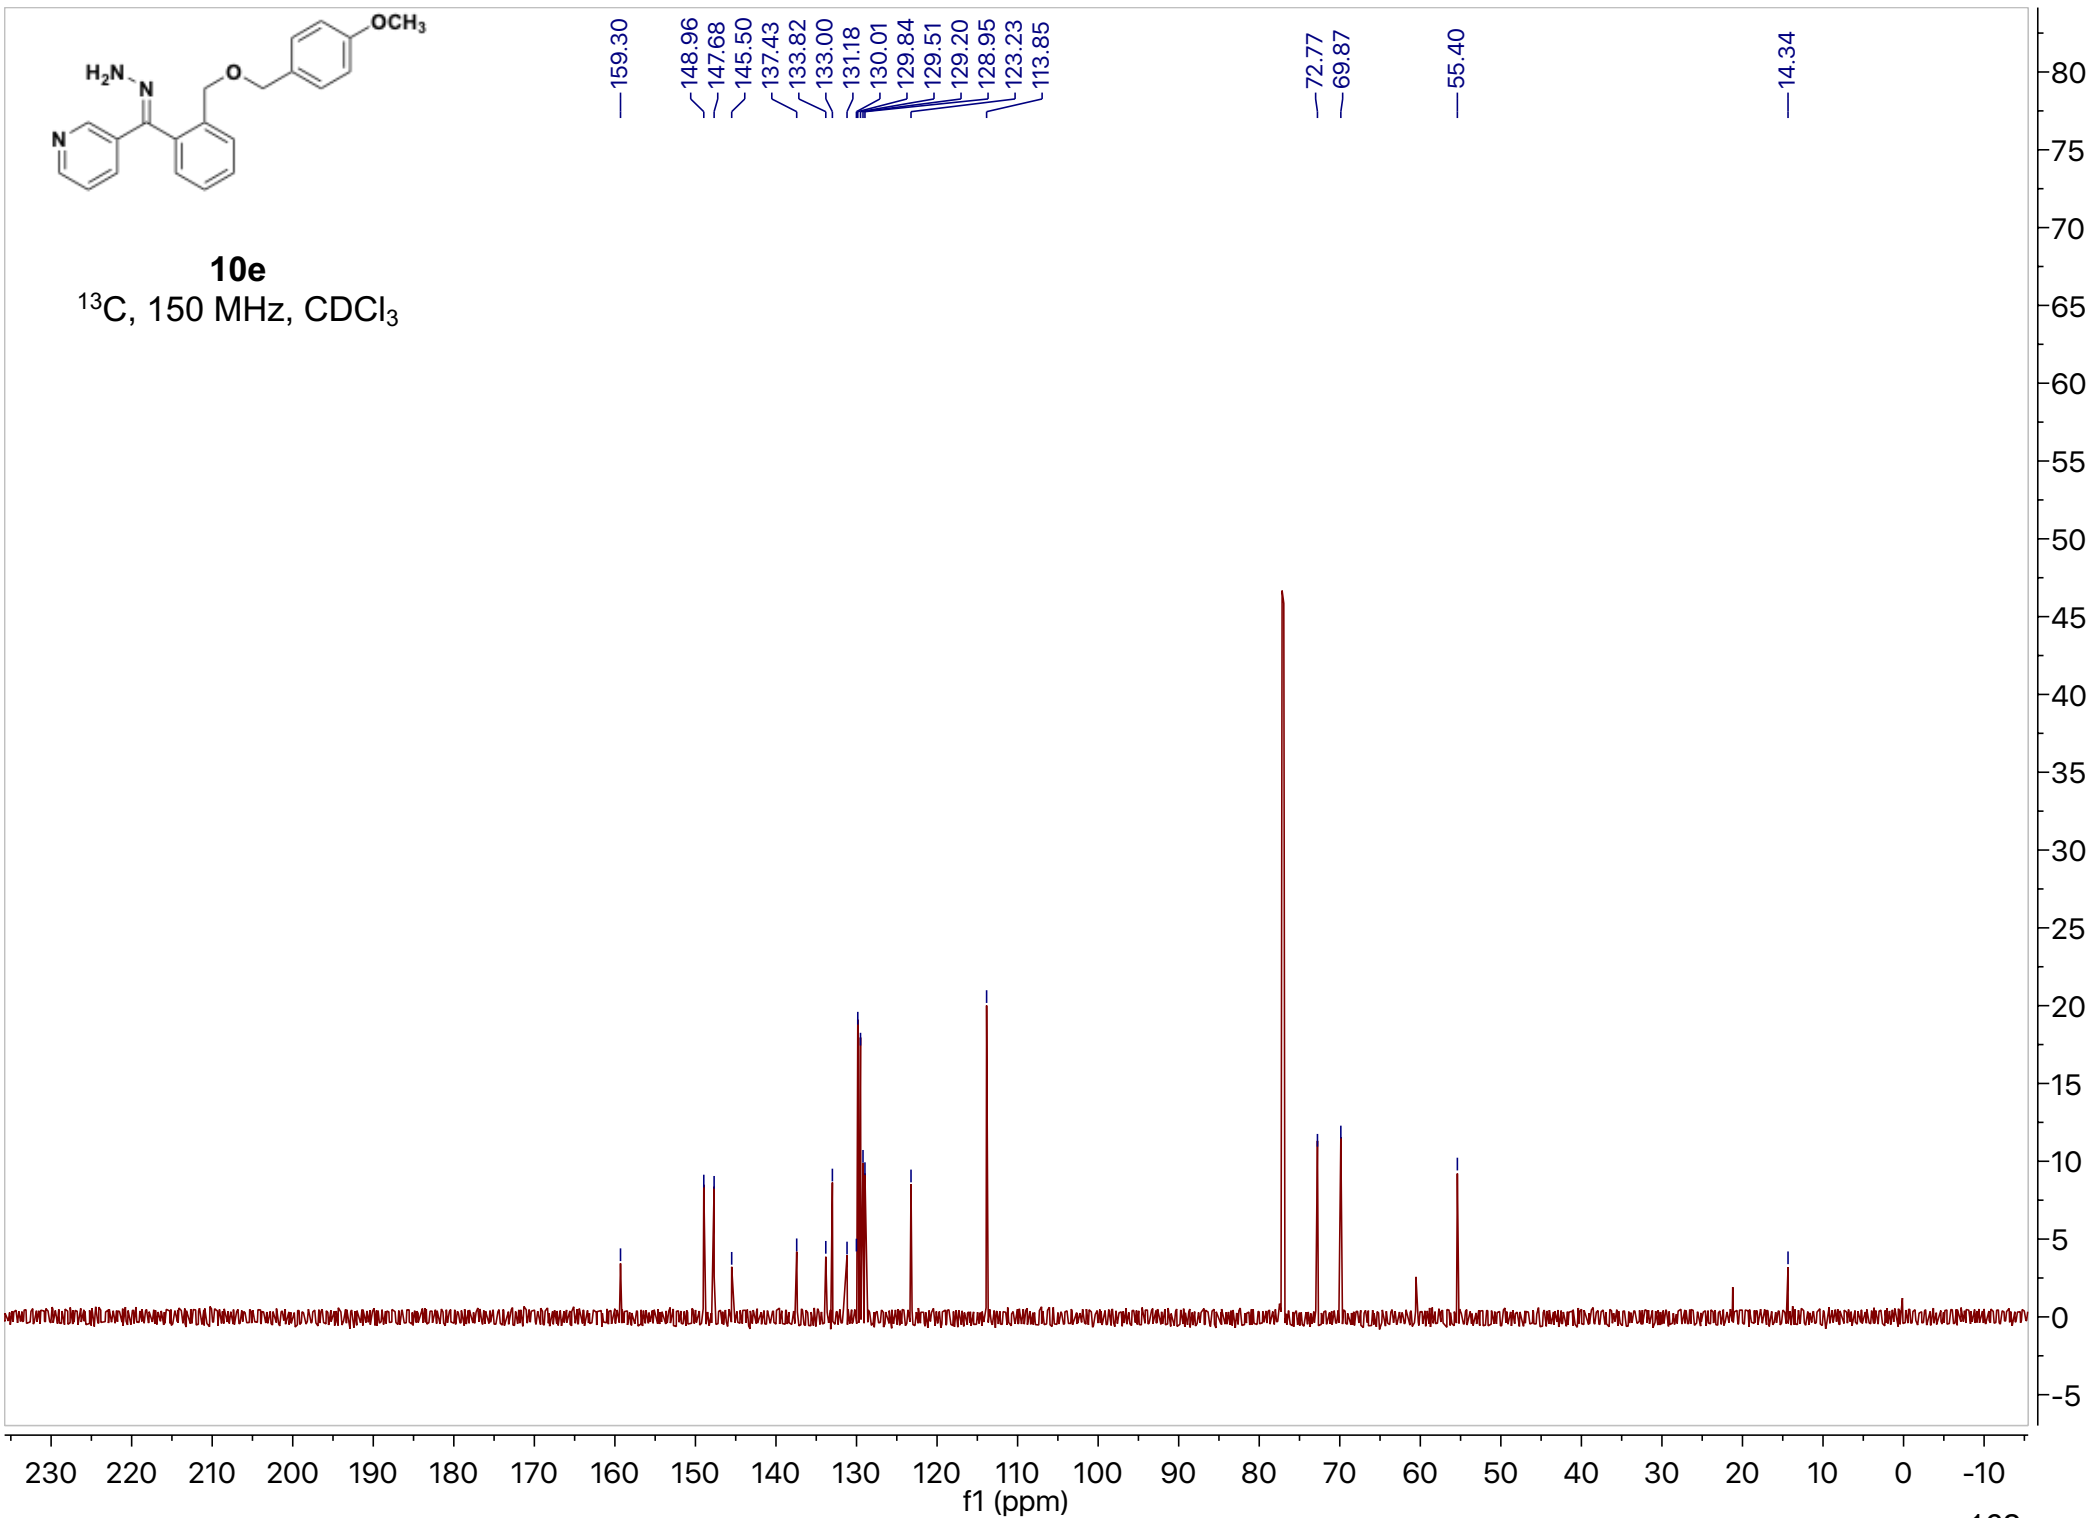



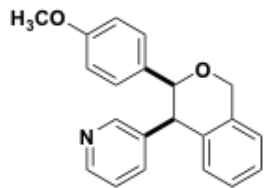

**11e**

$^1\text{H}$ , 600 MHz,  $\text{CDCl}_3$

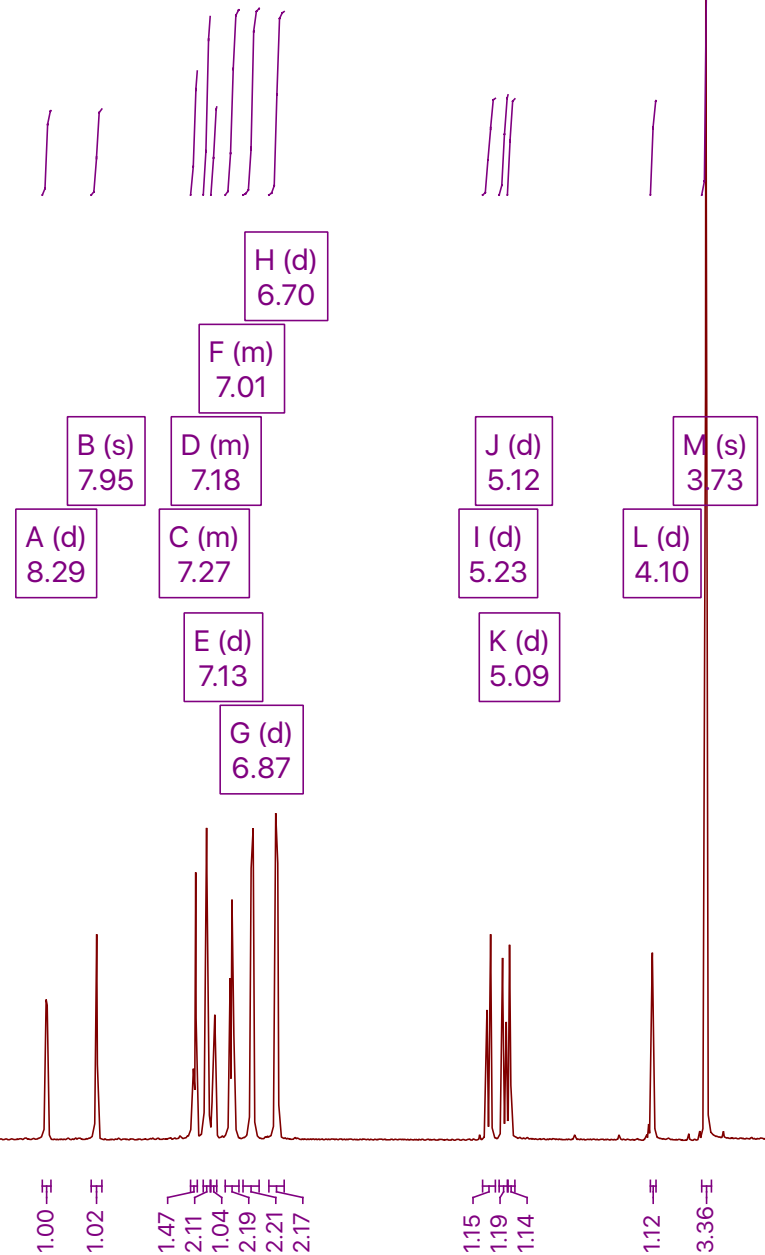

11.5 11.0 10.5 10.0 9.5 9.0 8.5 8.0 7.5 7.0 6.5 6.0 5.5 5.0 4.5 4.0 3.5 3.0 2.5 2.0 1.5 1.0 0.5 0.0 -0.5 -1.0 -1.5 -2.0  
f1 (ppm)



**11e**

$^{13}\text{C}$ , 150 MHz,  $\text{CD}_2\text{Cl}_2$

- 159.10
- 151.22
- 147.91
- 137.72
- 137.24
- 136.70
- 134.93
- 132.66
- 130.46
- 127.44
- 127.43
- 127.34
- 124.82
- 122.98
- 113.61

79.49

69.58

55.59

48.30

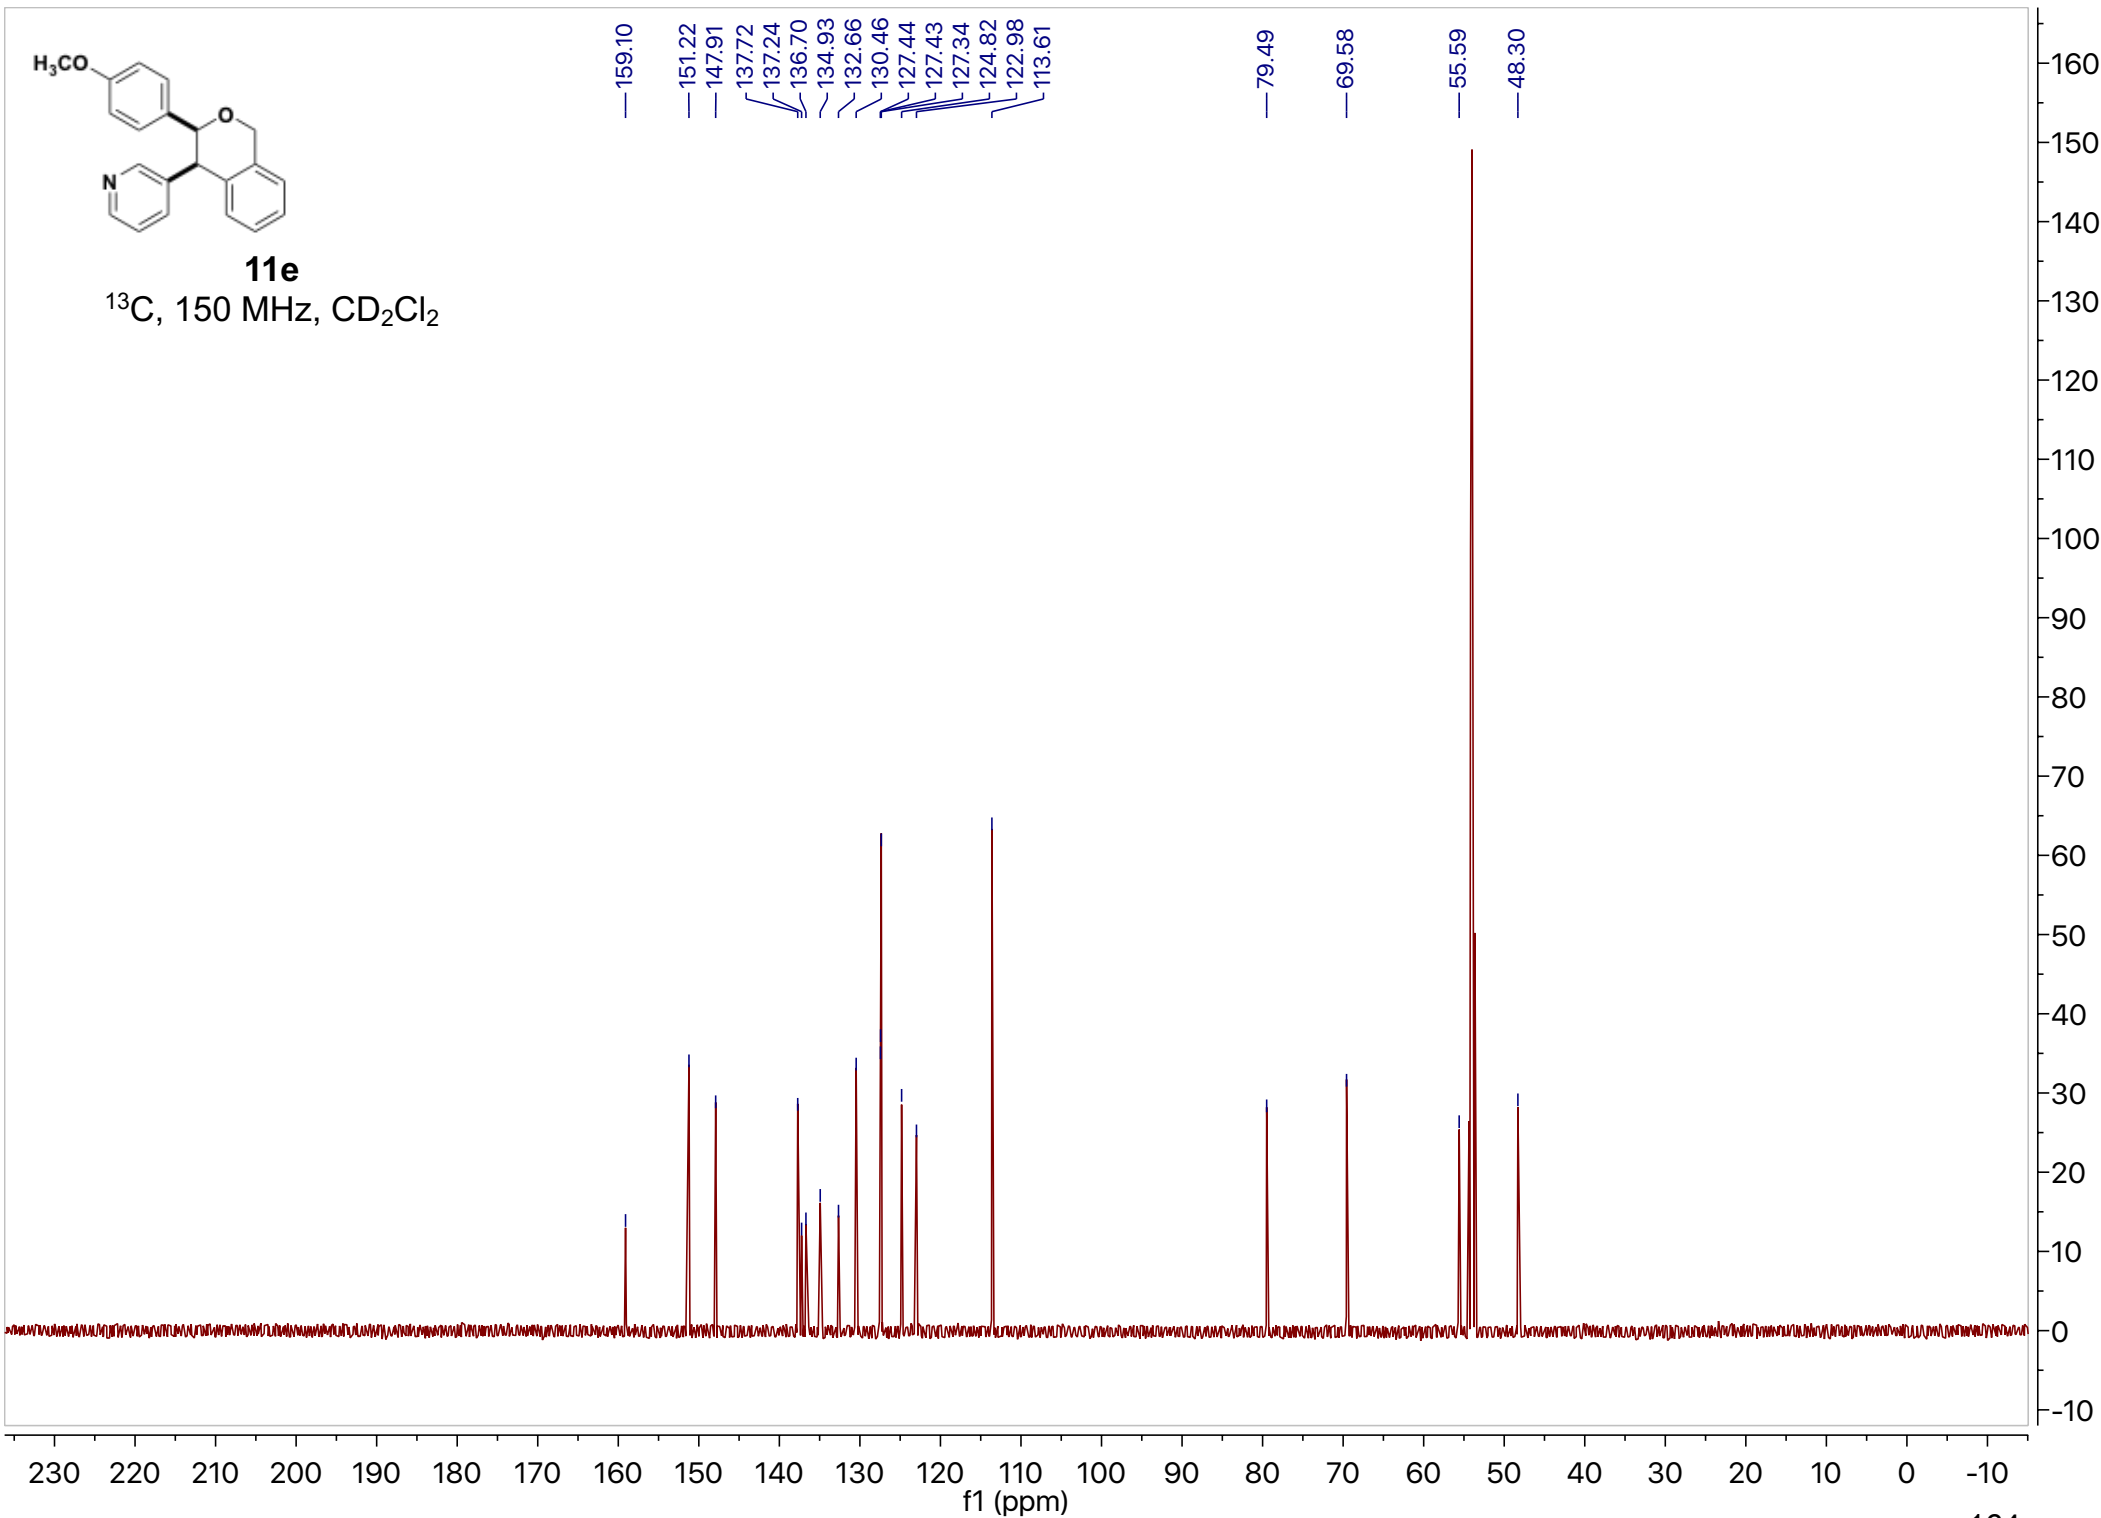

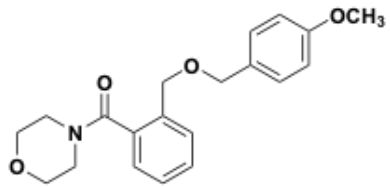

**44**

<sup>1</sup>H, 400 MHz, CDCl<sub>3</sub>

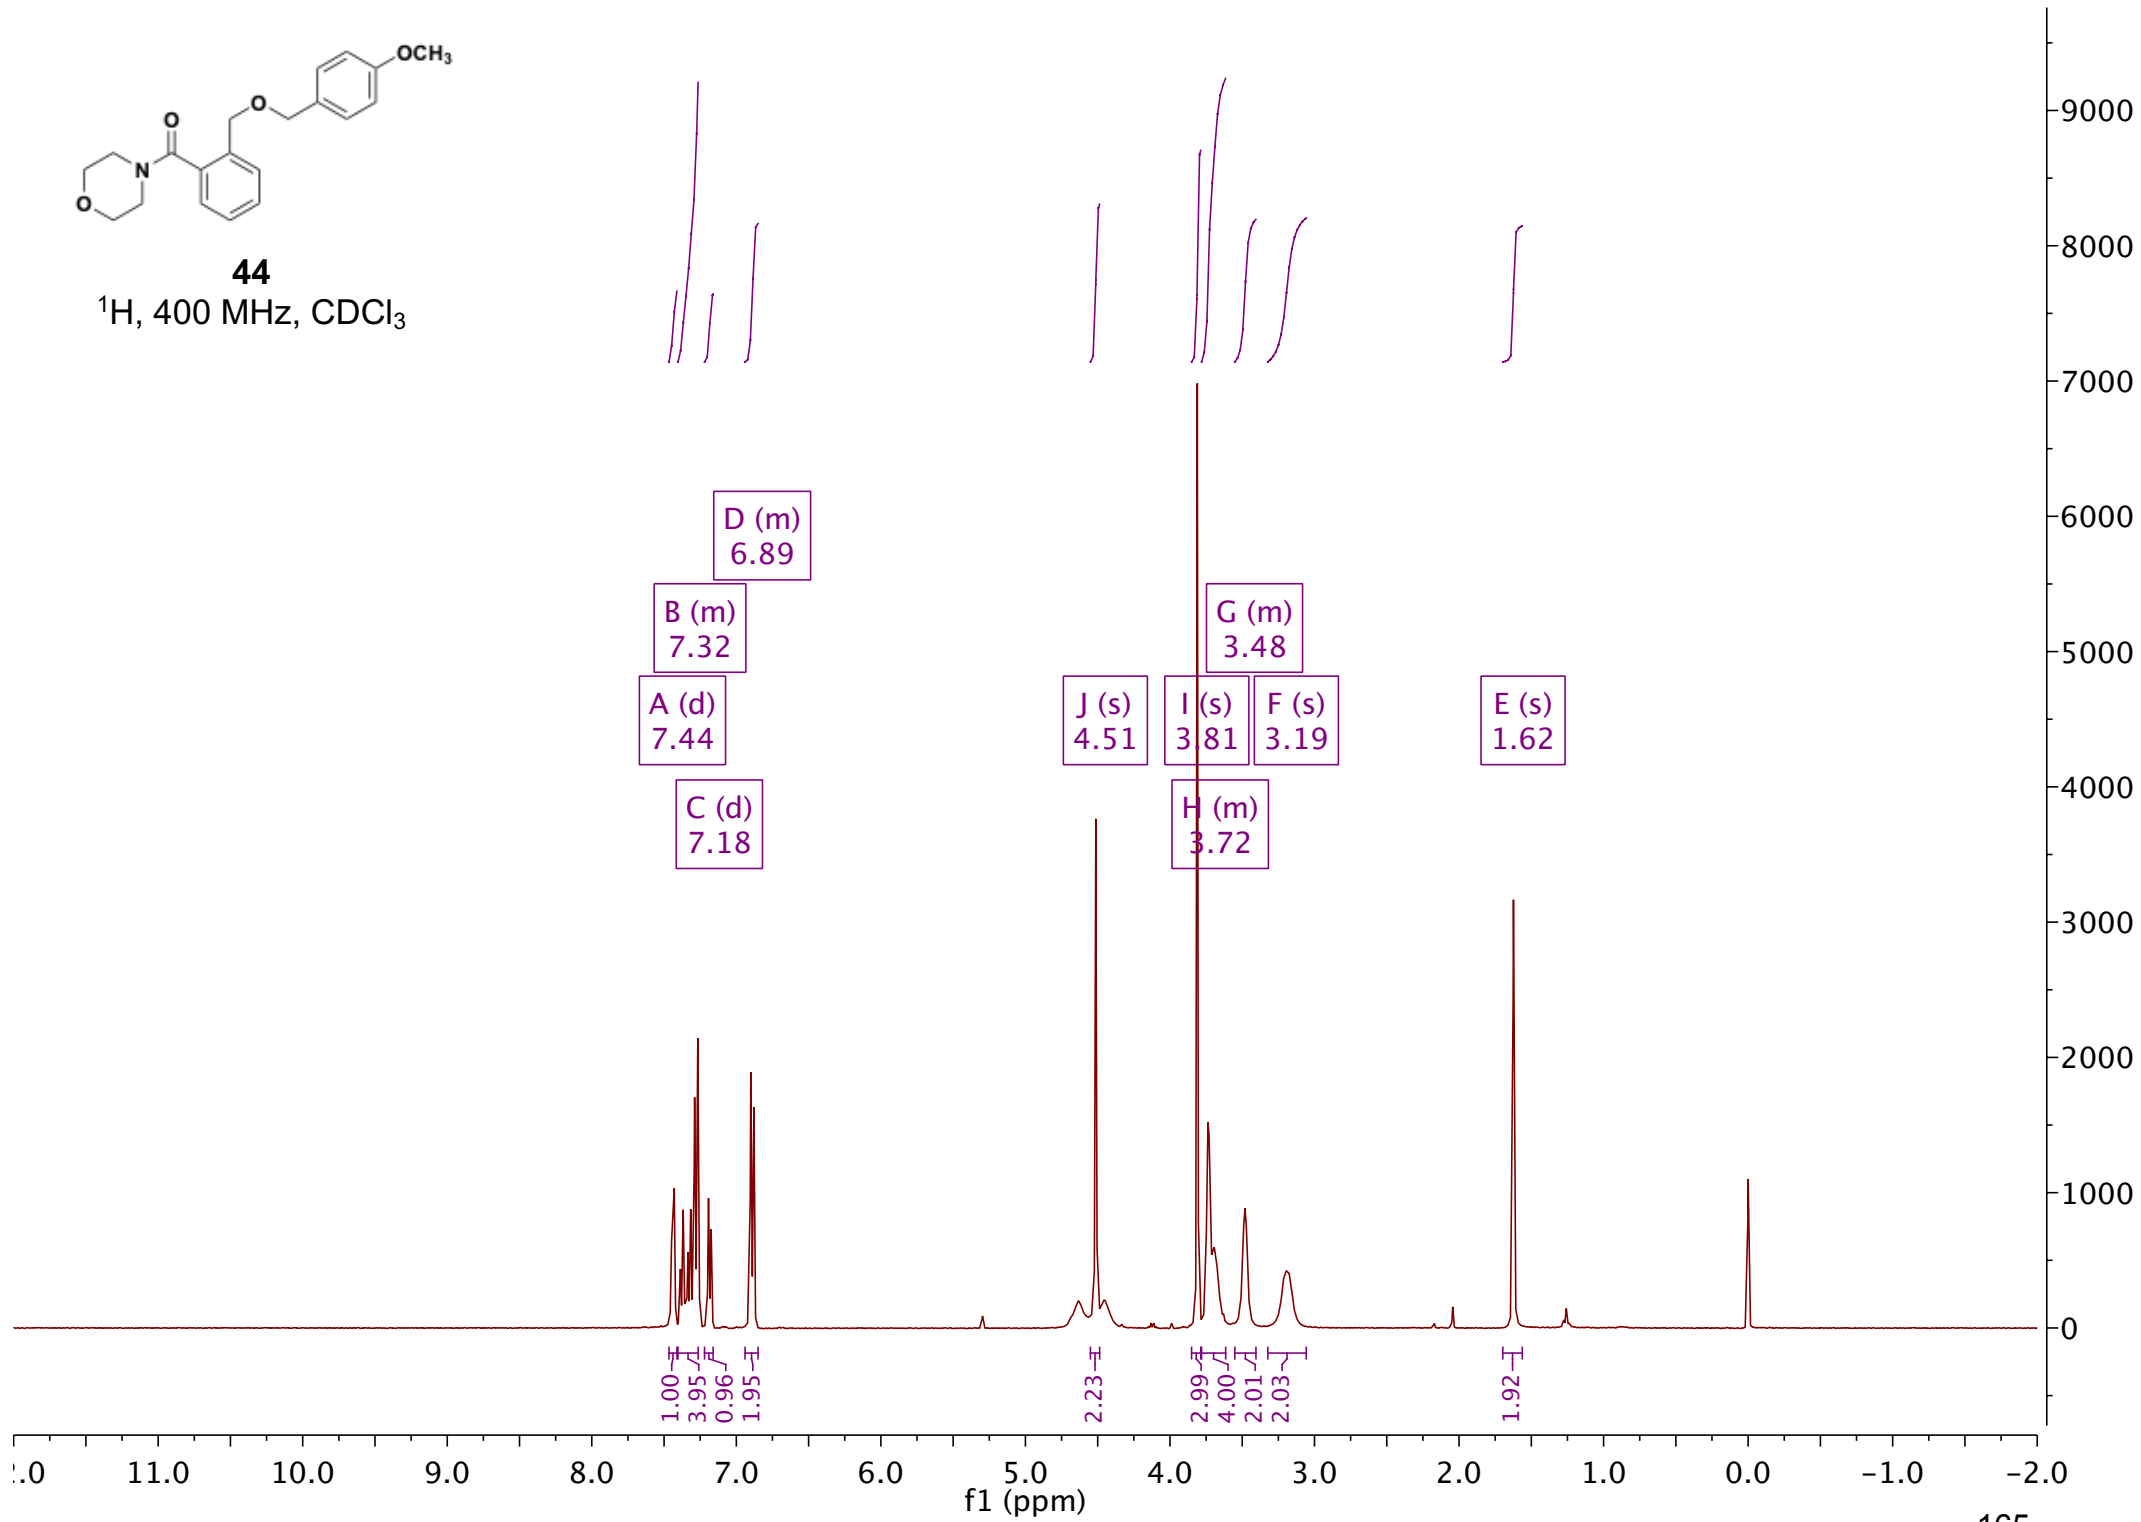

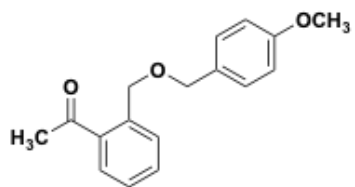

**45**

$^1\text{H}$ , 400 MHz,  $\text{CDCl}_3$

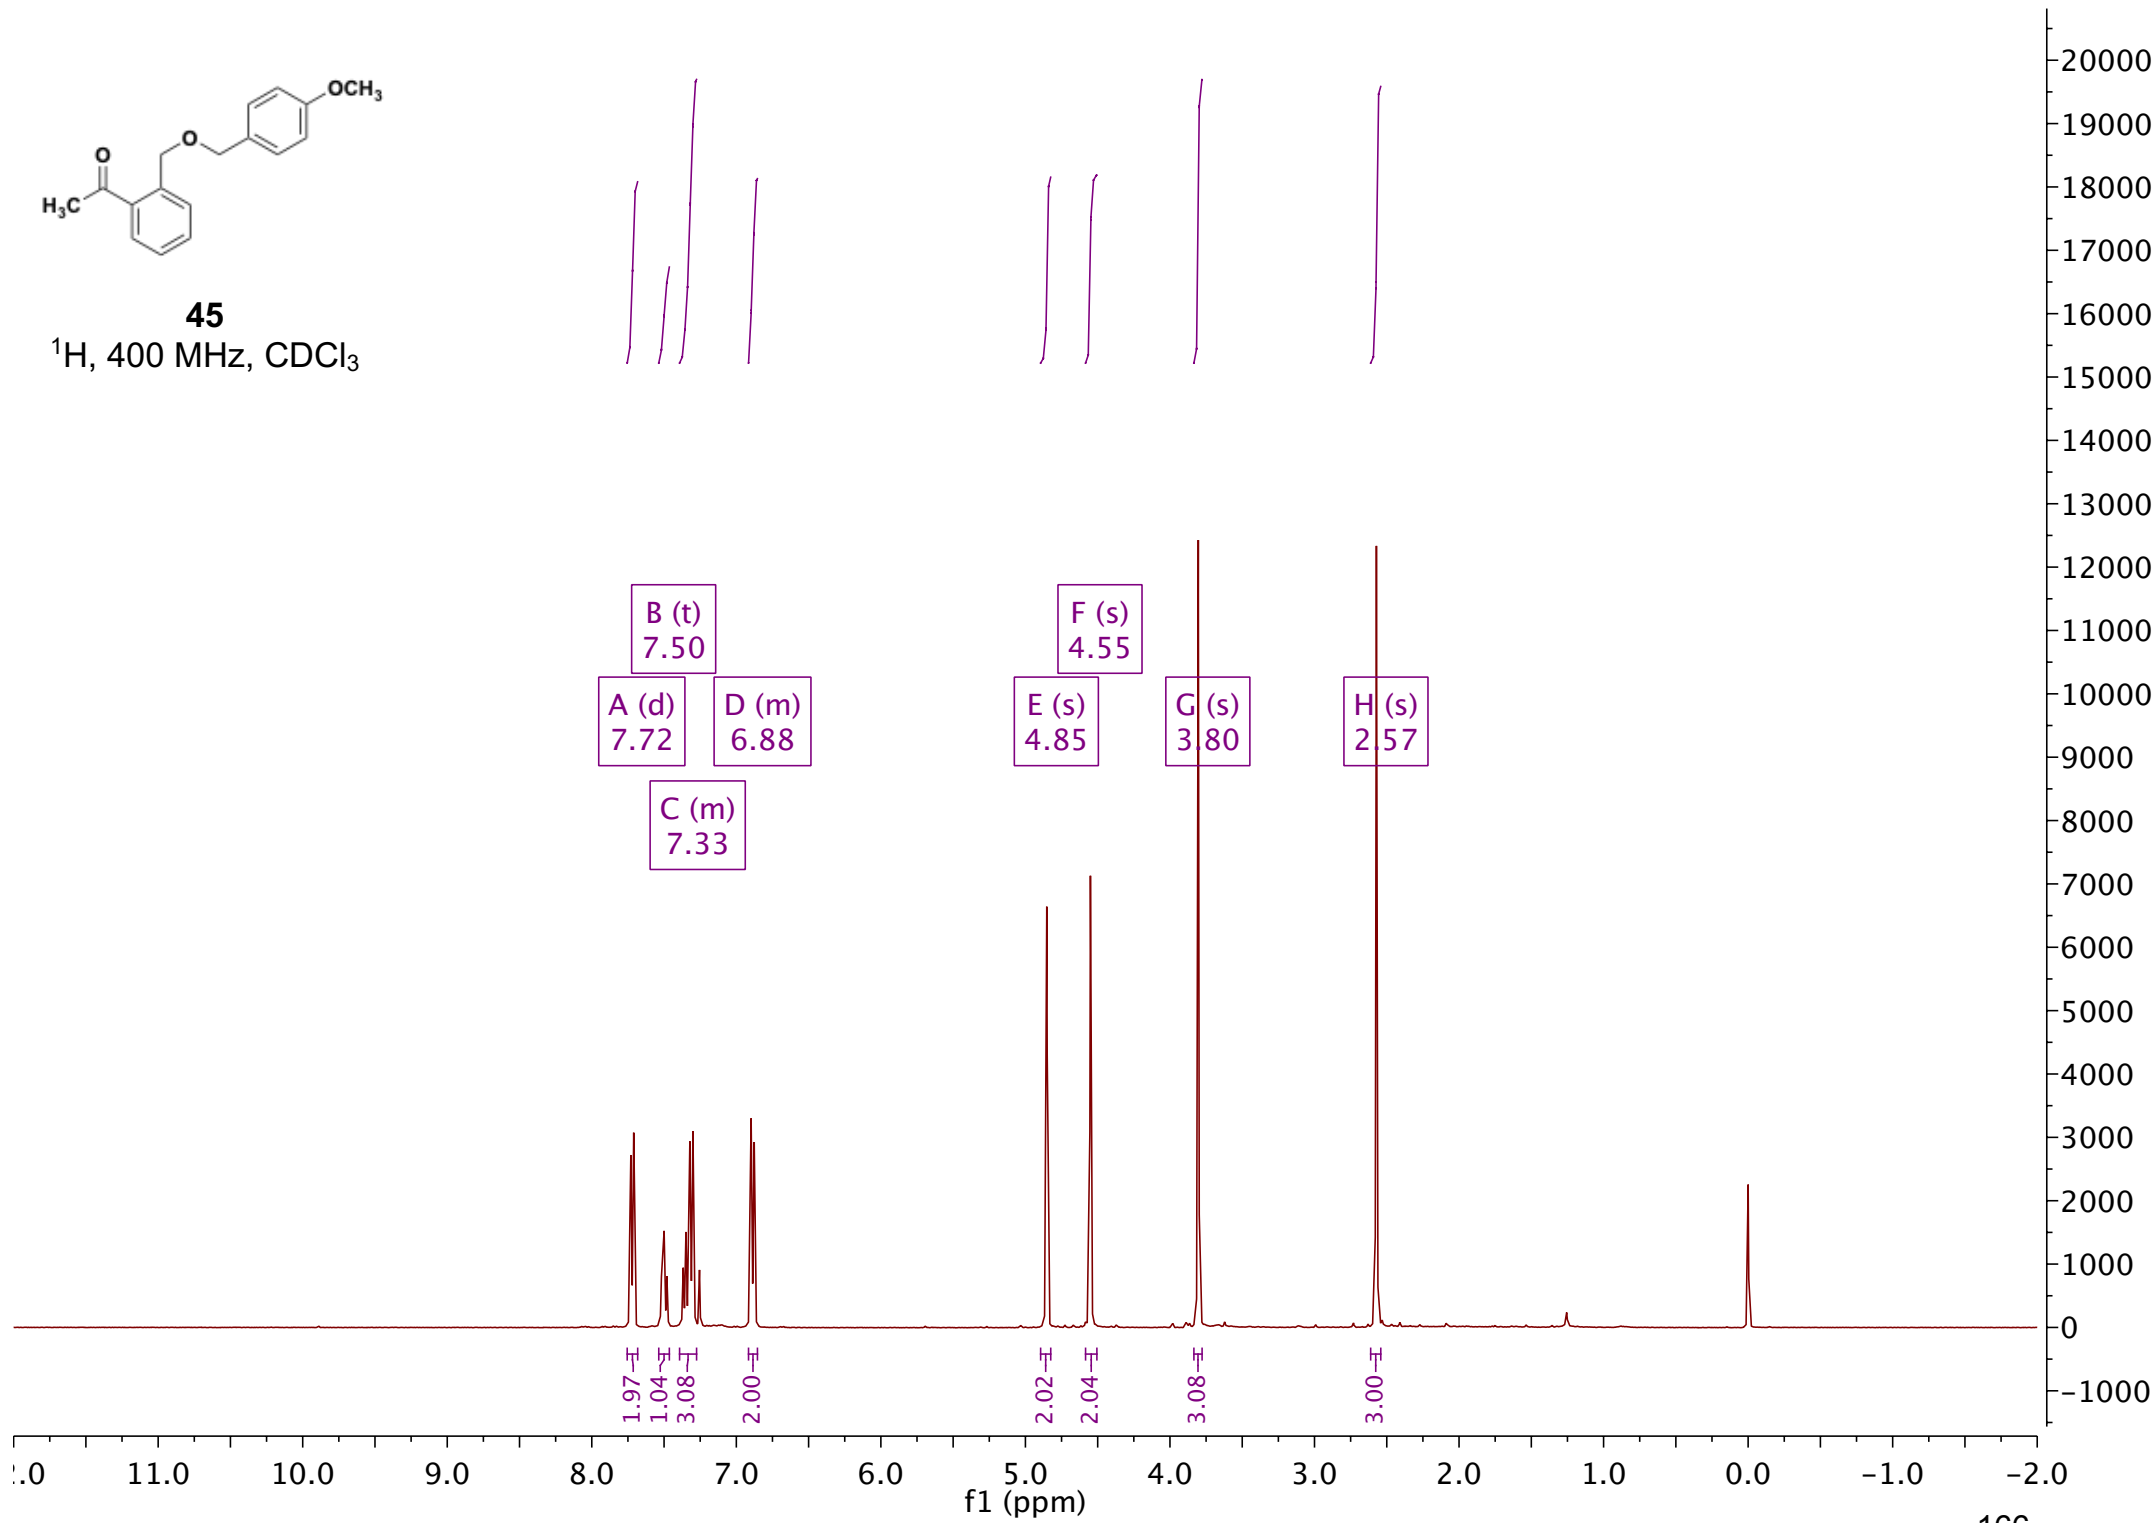

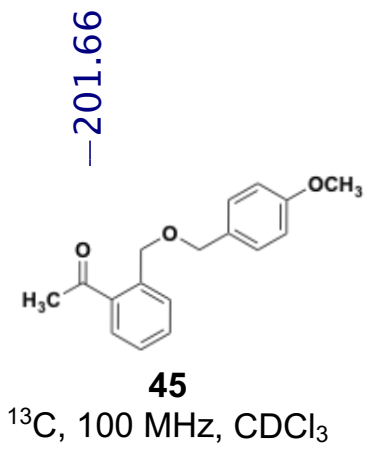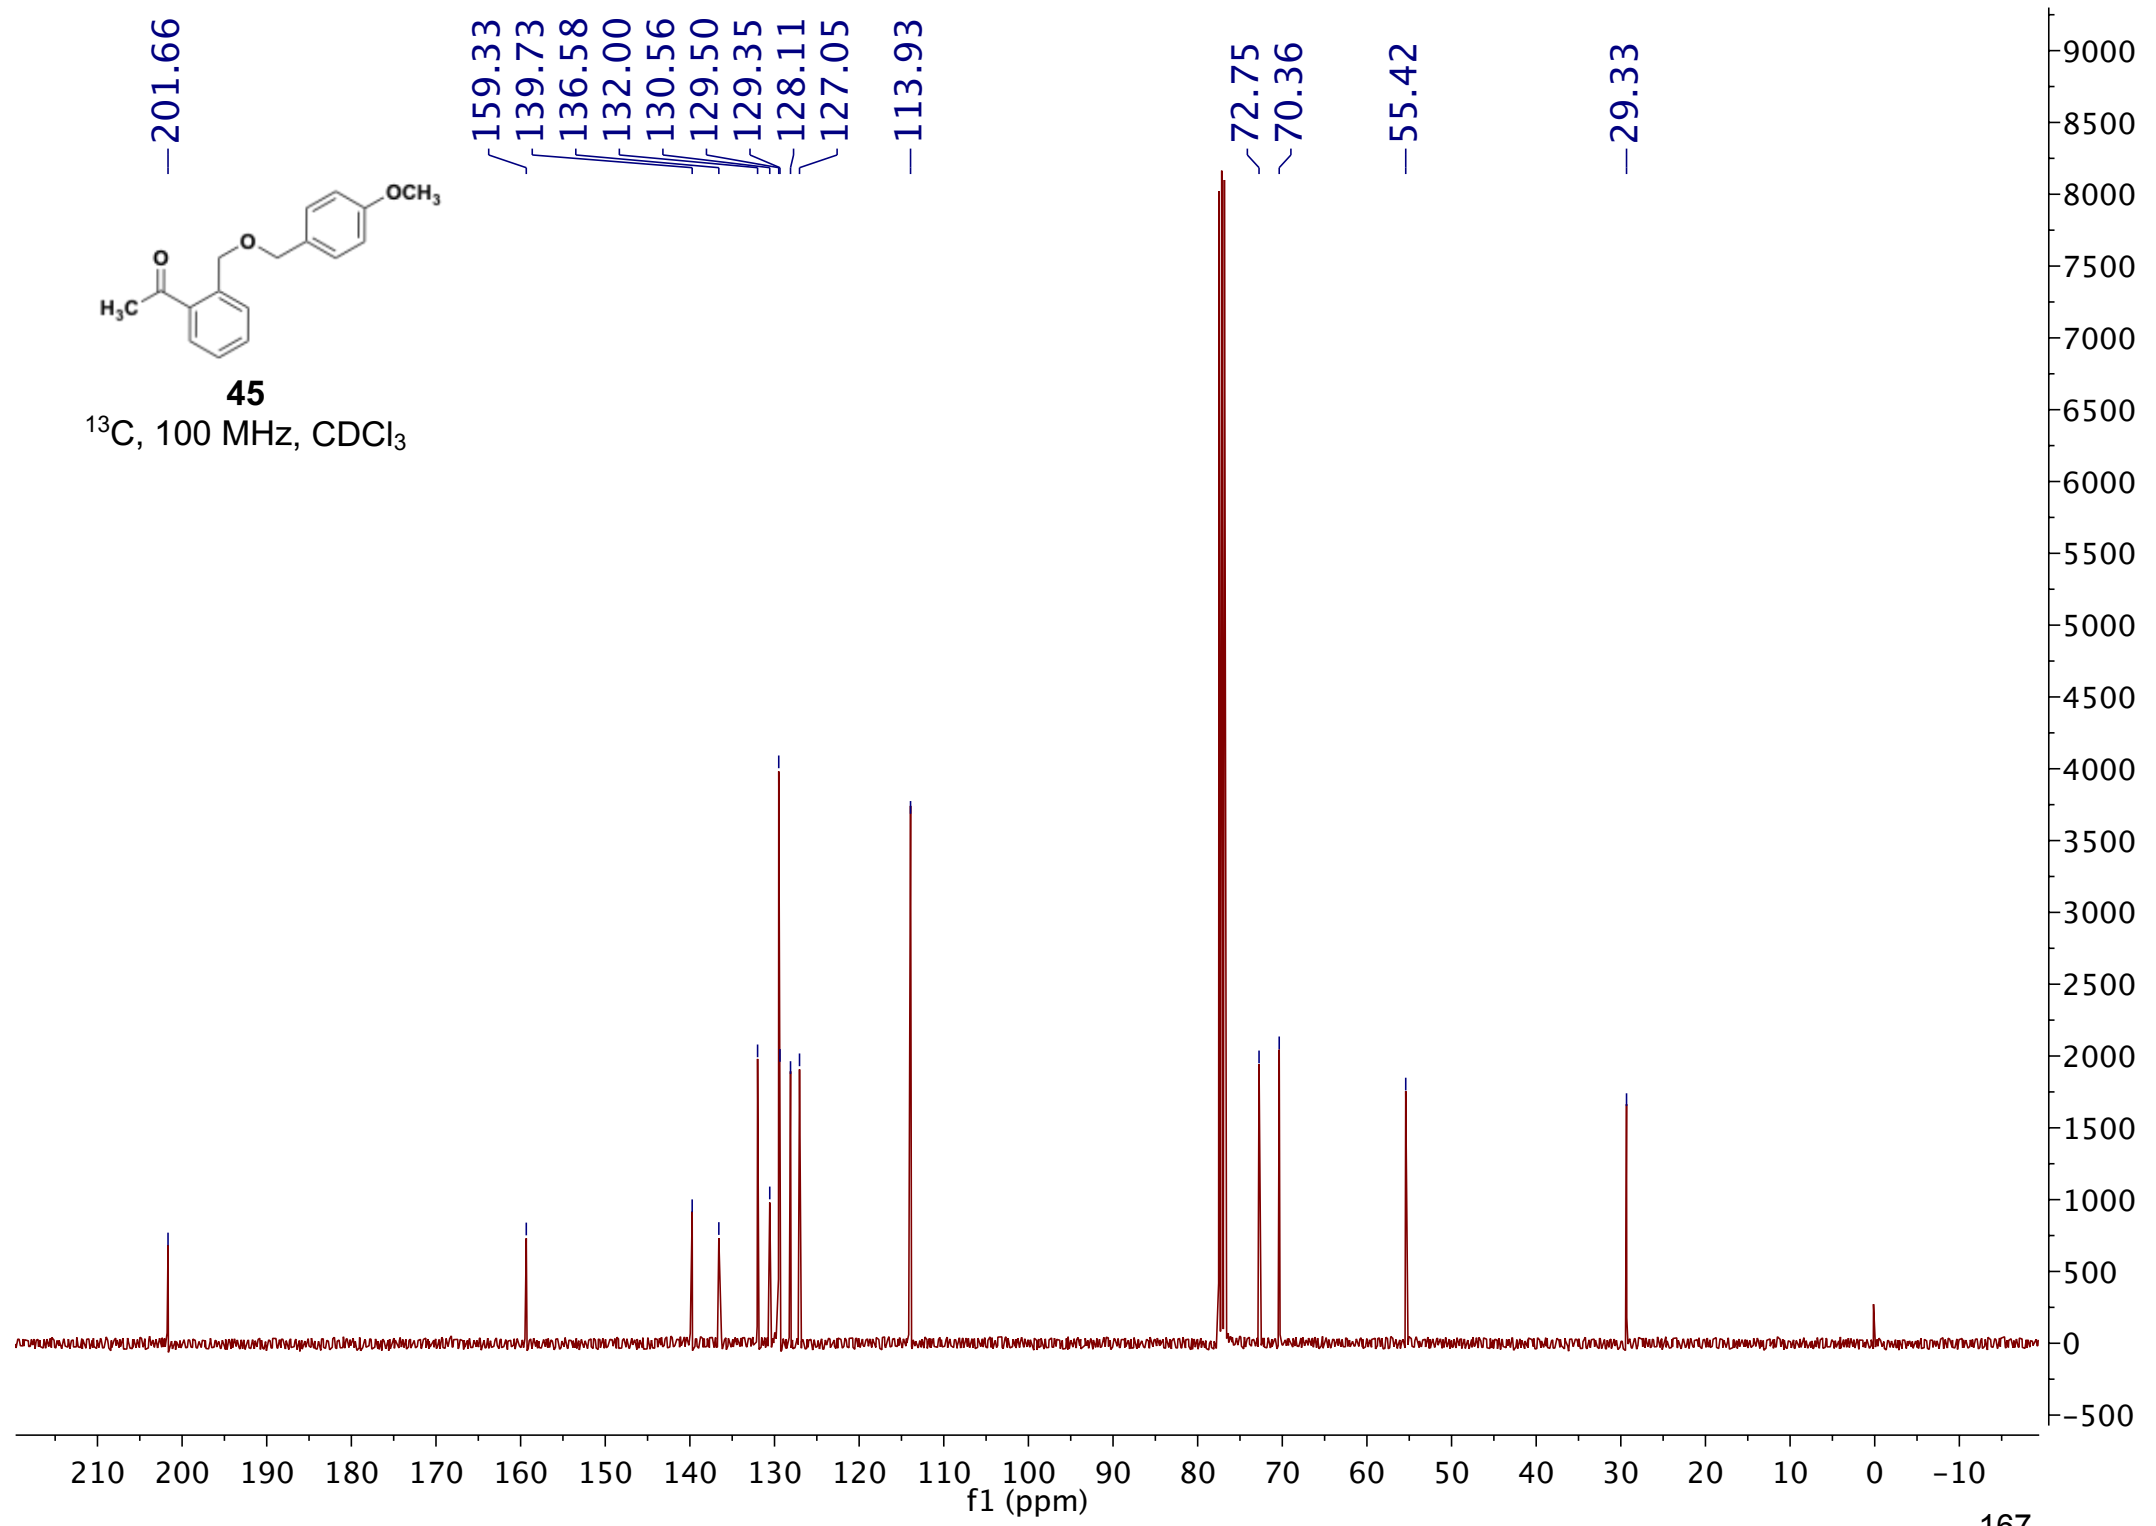

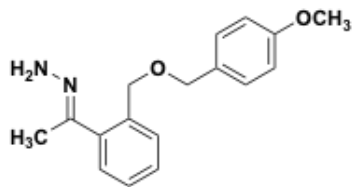

**10f**

$^1\text{H}$ , 400 MHz,  $\text{CDCl}_3$

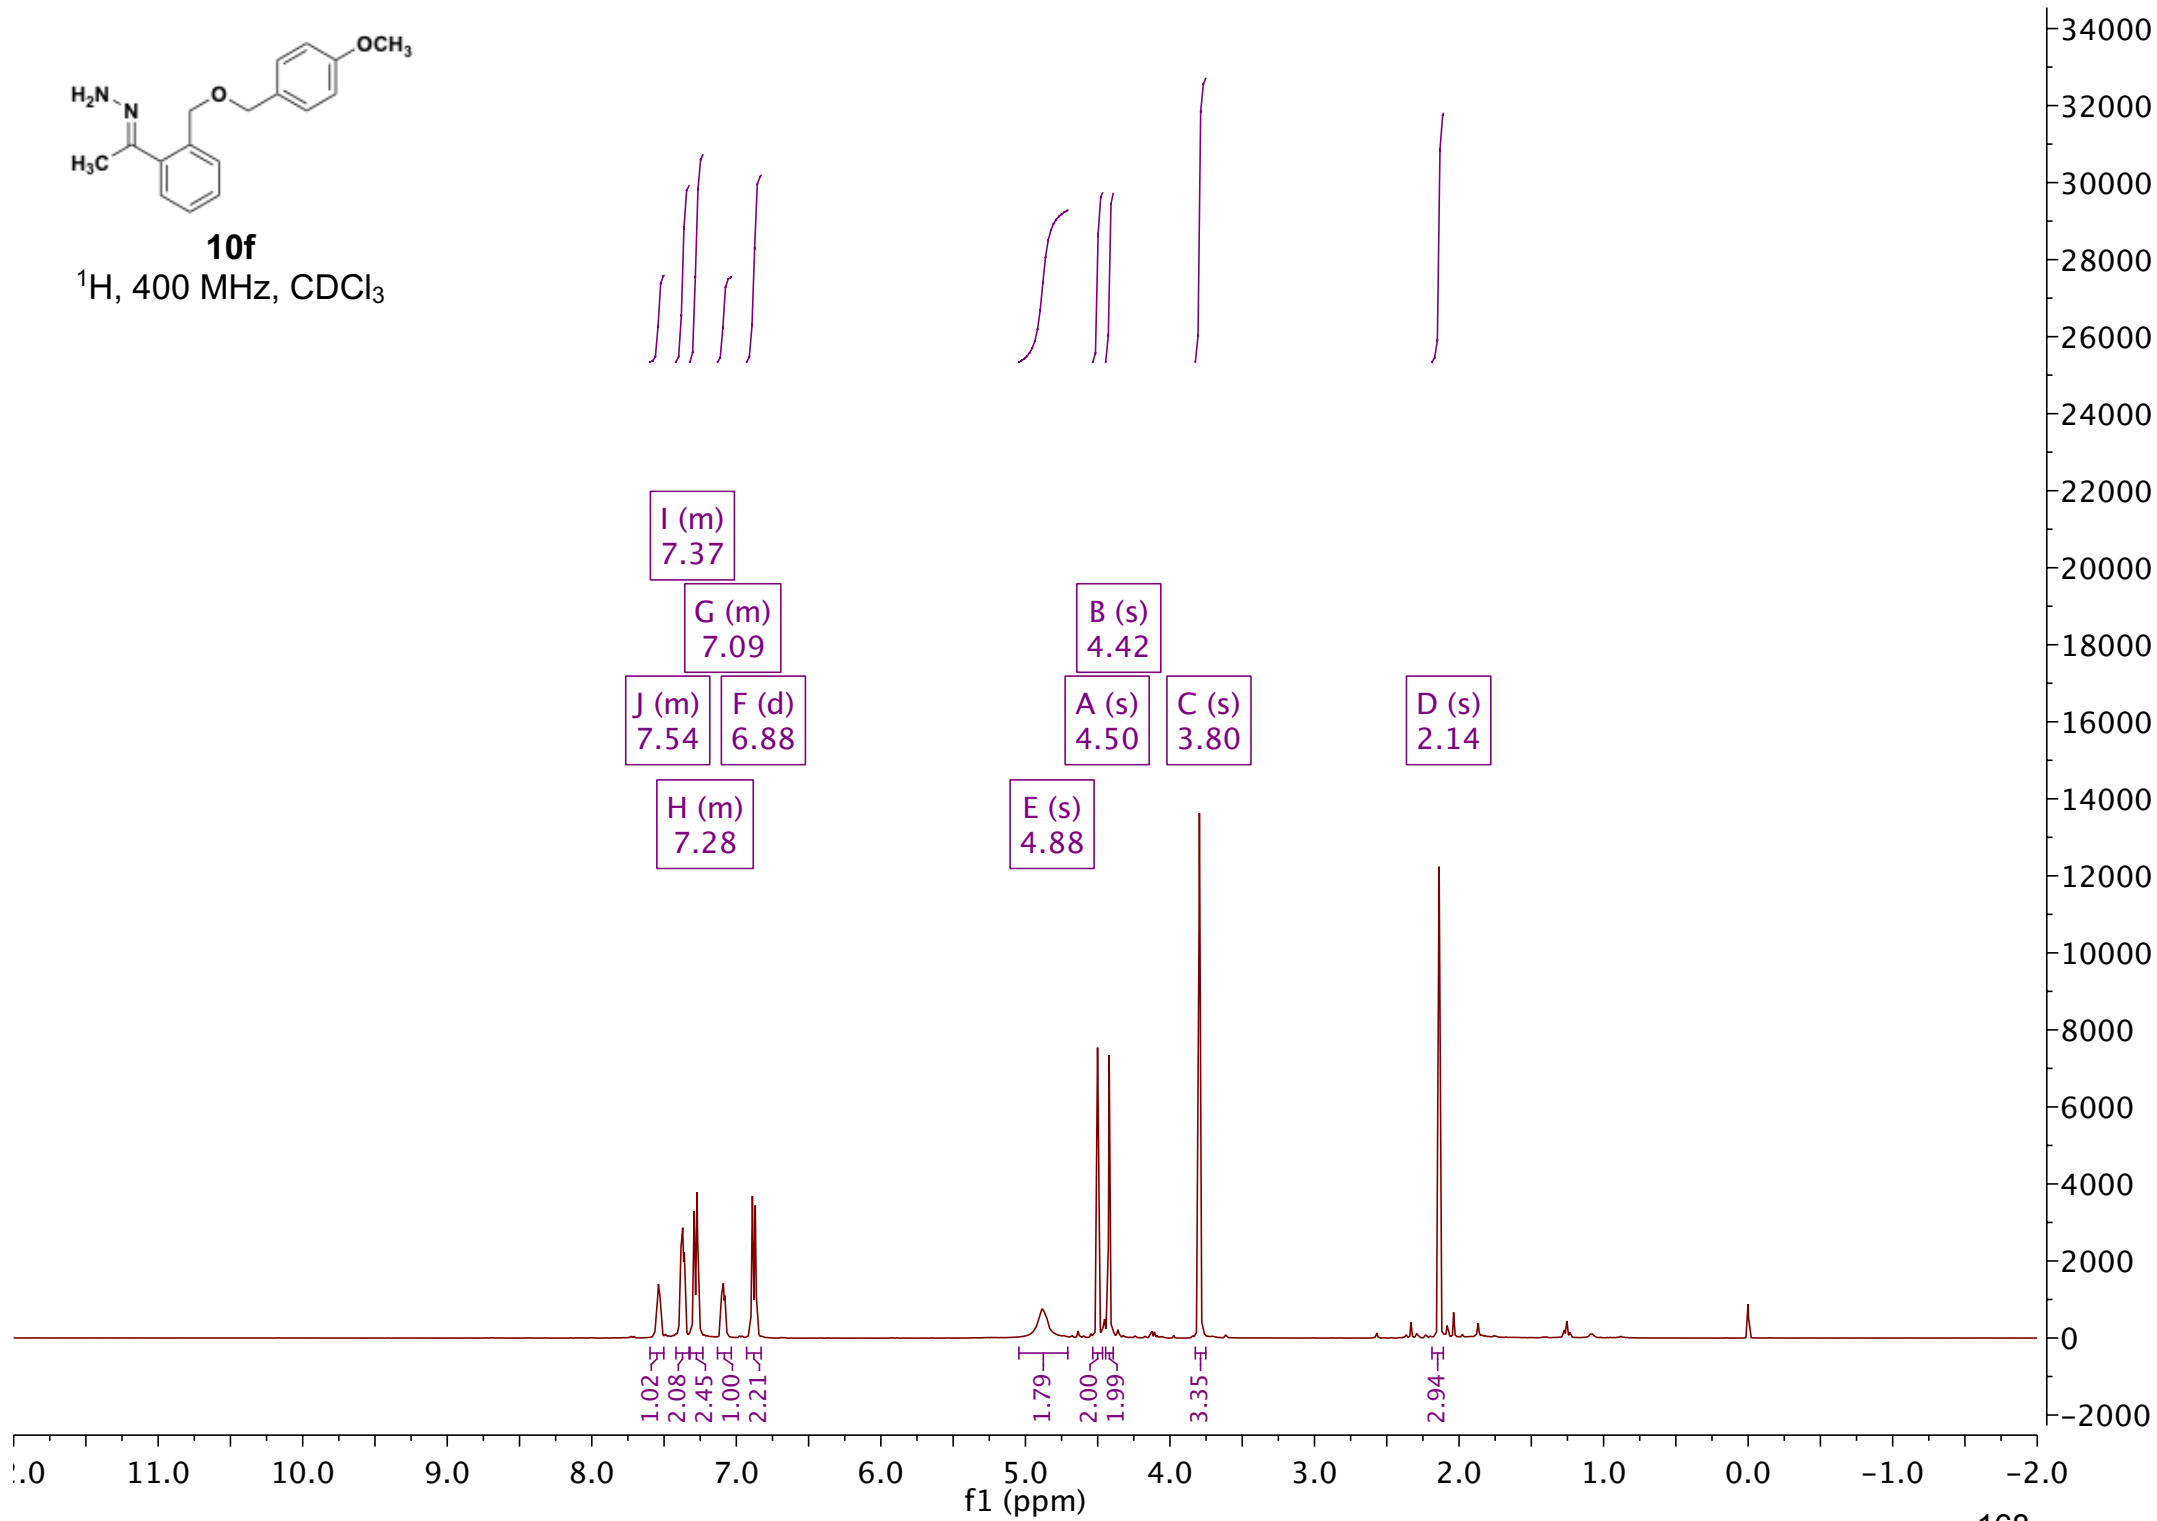

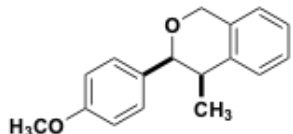

**11f**

$^1\text{H}$ , 400 MHz,  $\text{CDCl}_3$

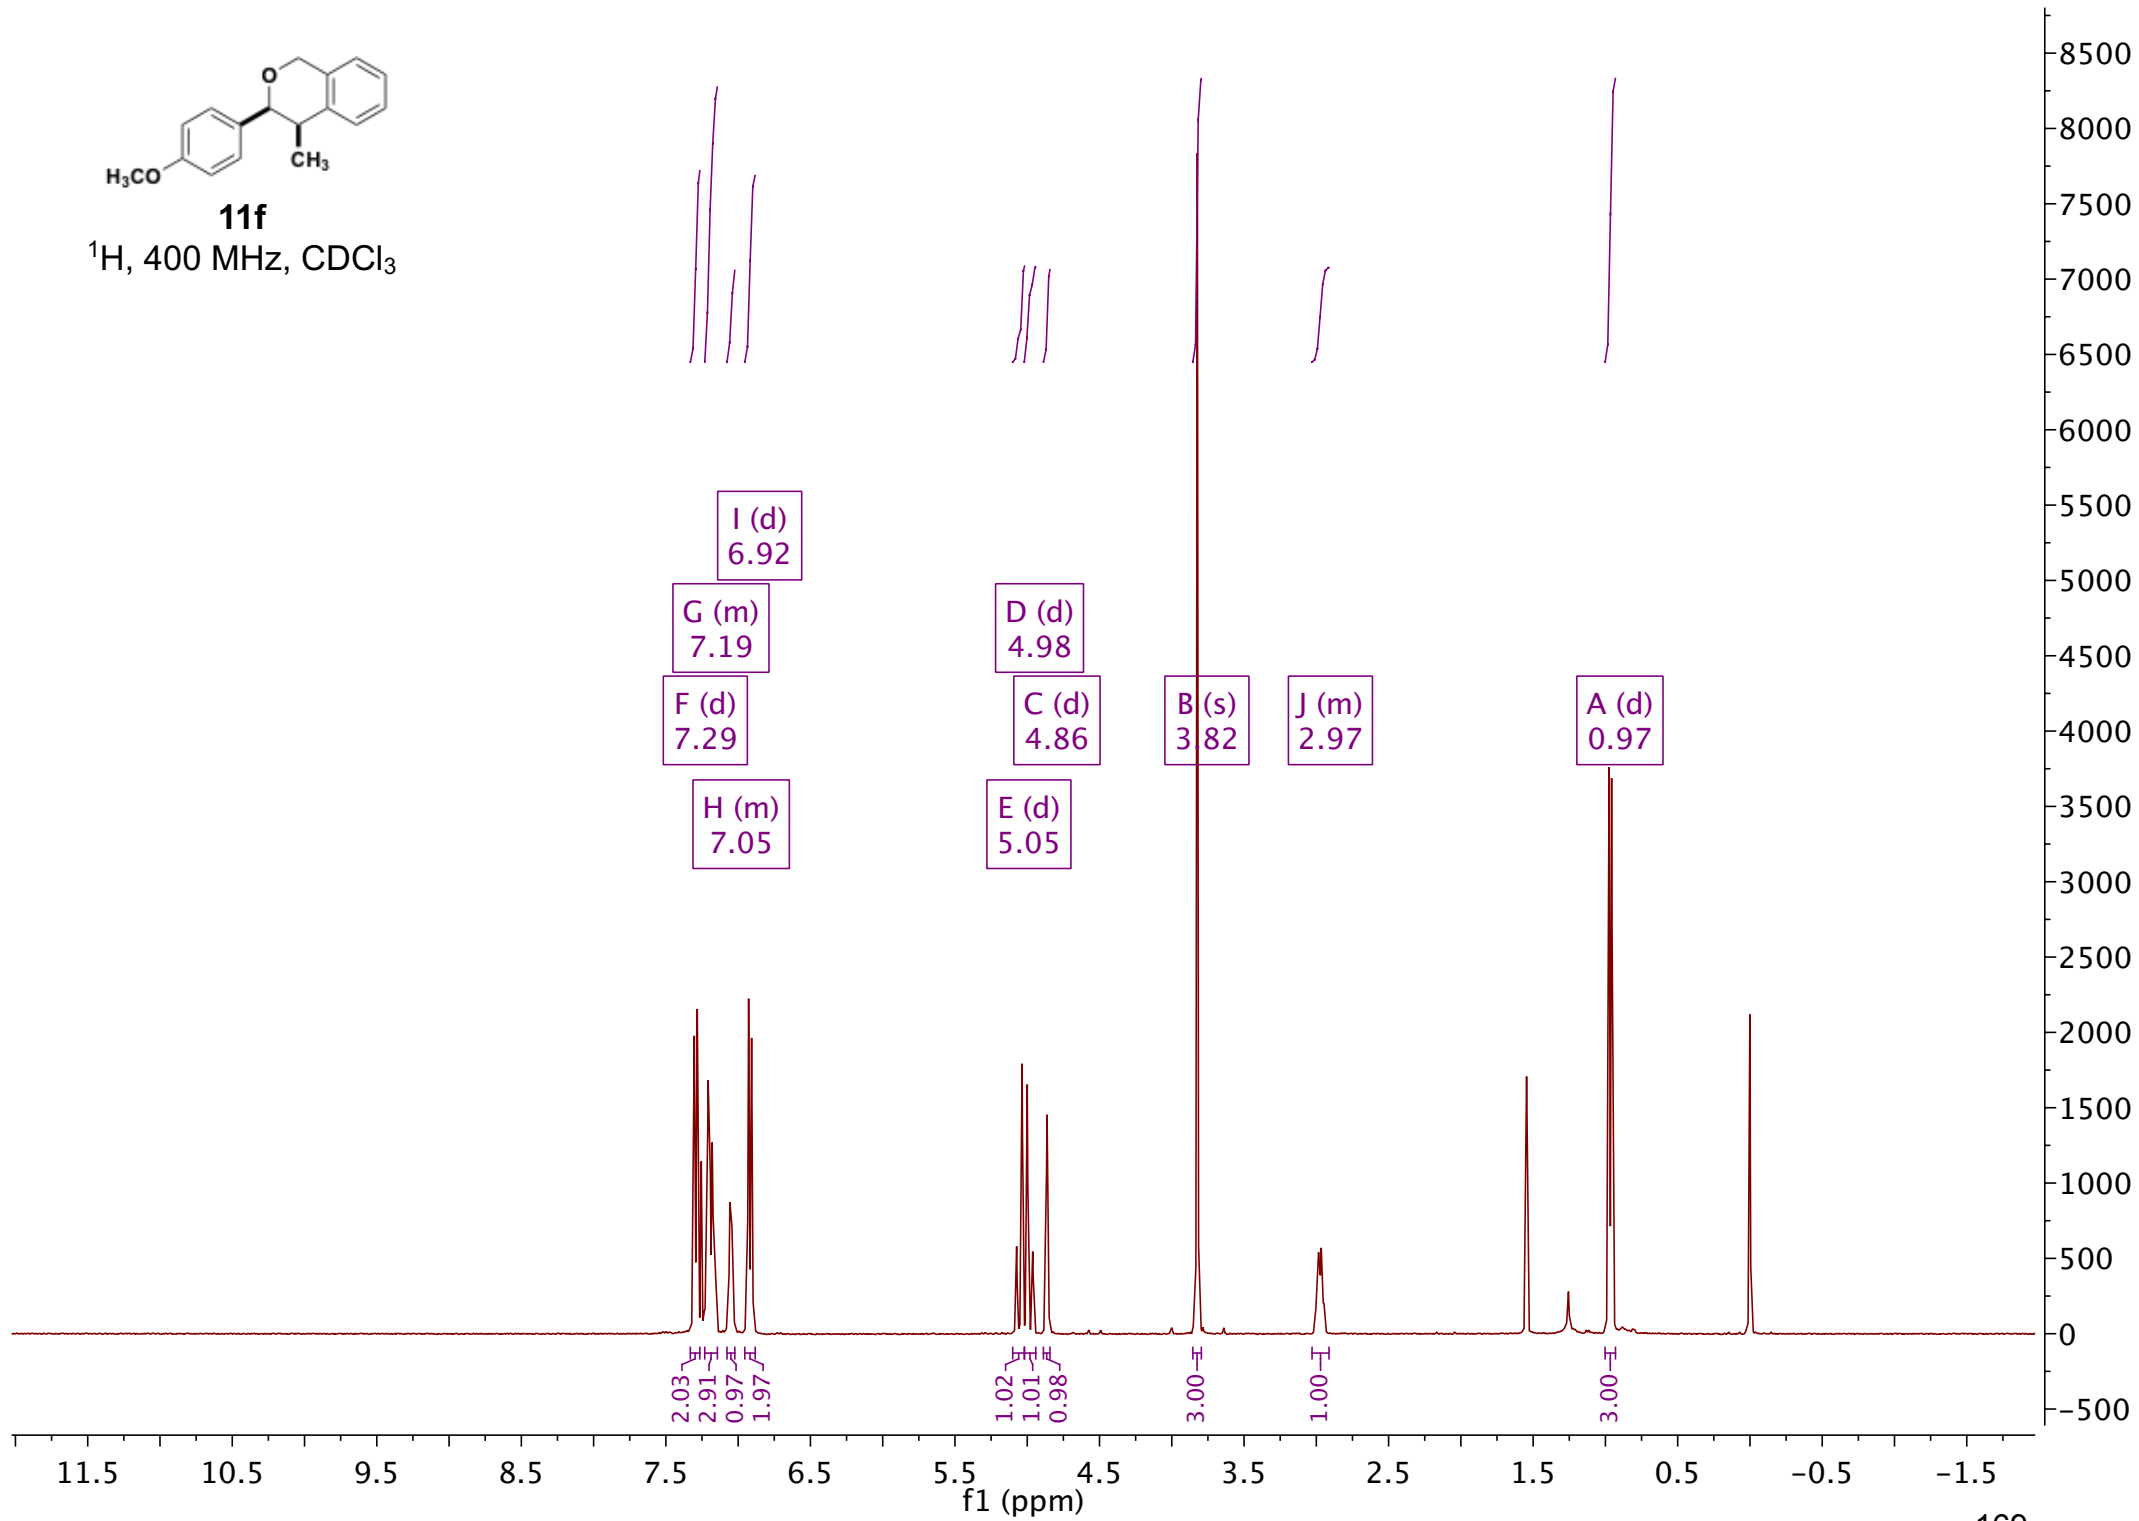

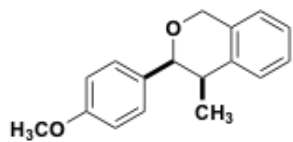

**11f**

$^{13}\text{C}$ , 100 MHz,  $\text{CDCl}_3$

158.64  
140.48  
134.05  
133.26  
129.03  
126.86  
126.59  
126.28  
124.21  
— 113.66

78.36  
— 69.03  
— 55.42  
— 38.14  
— 17.18

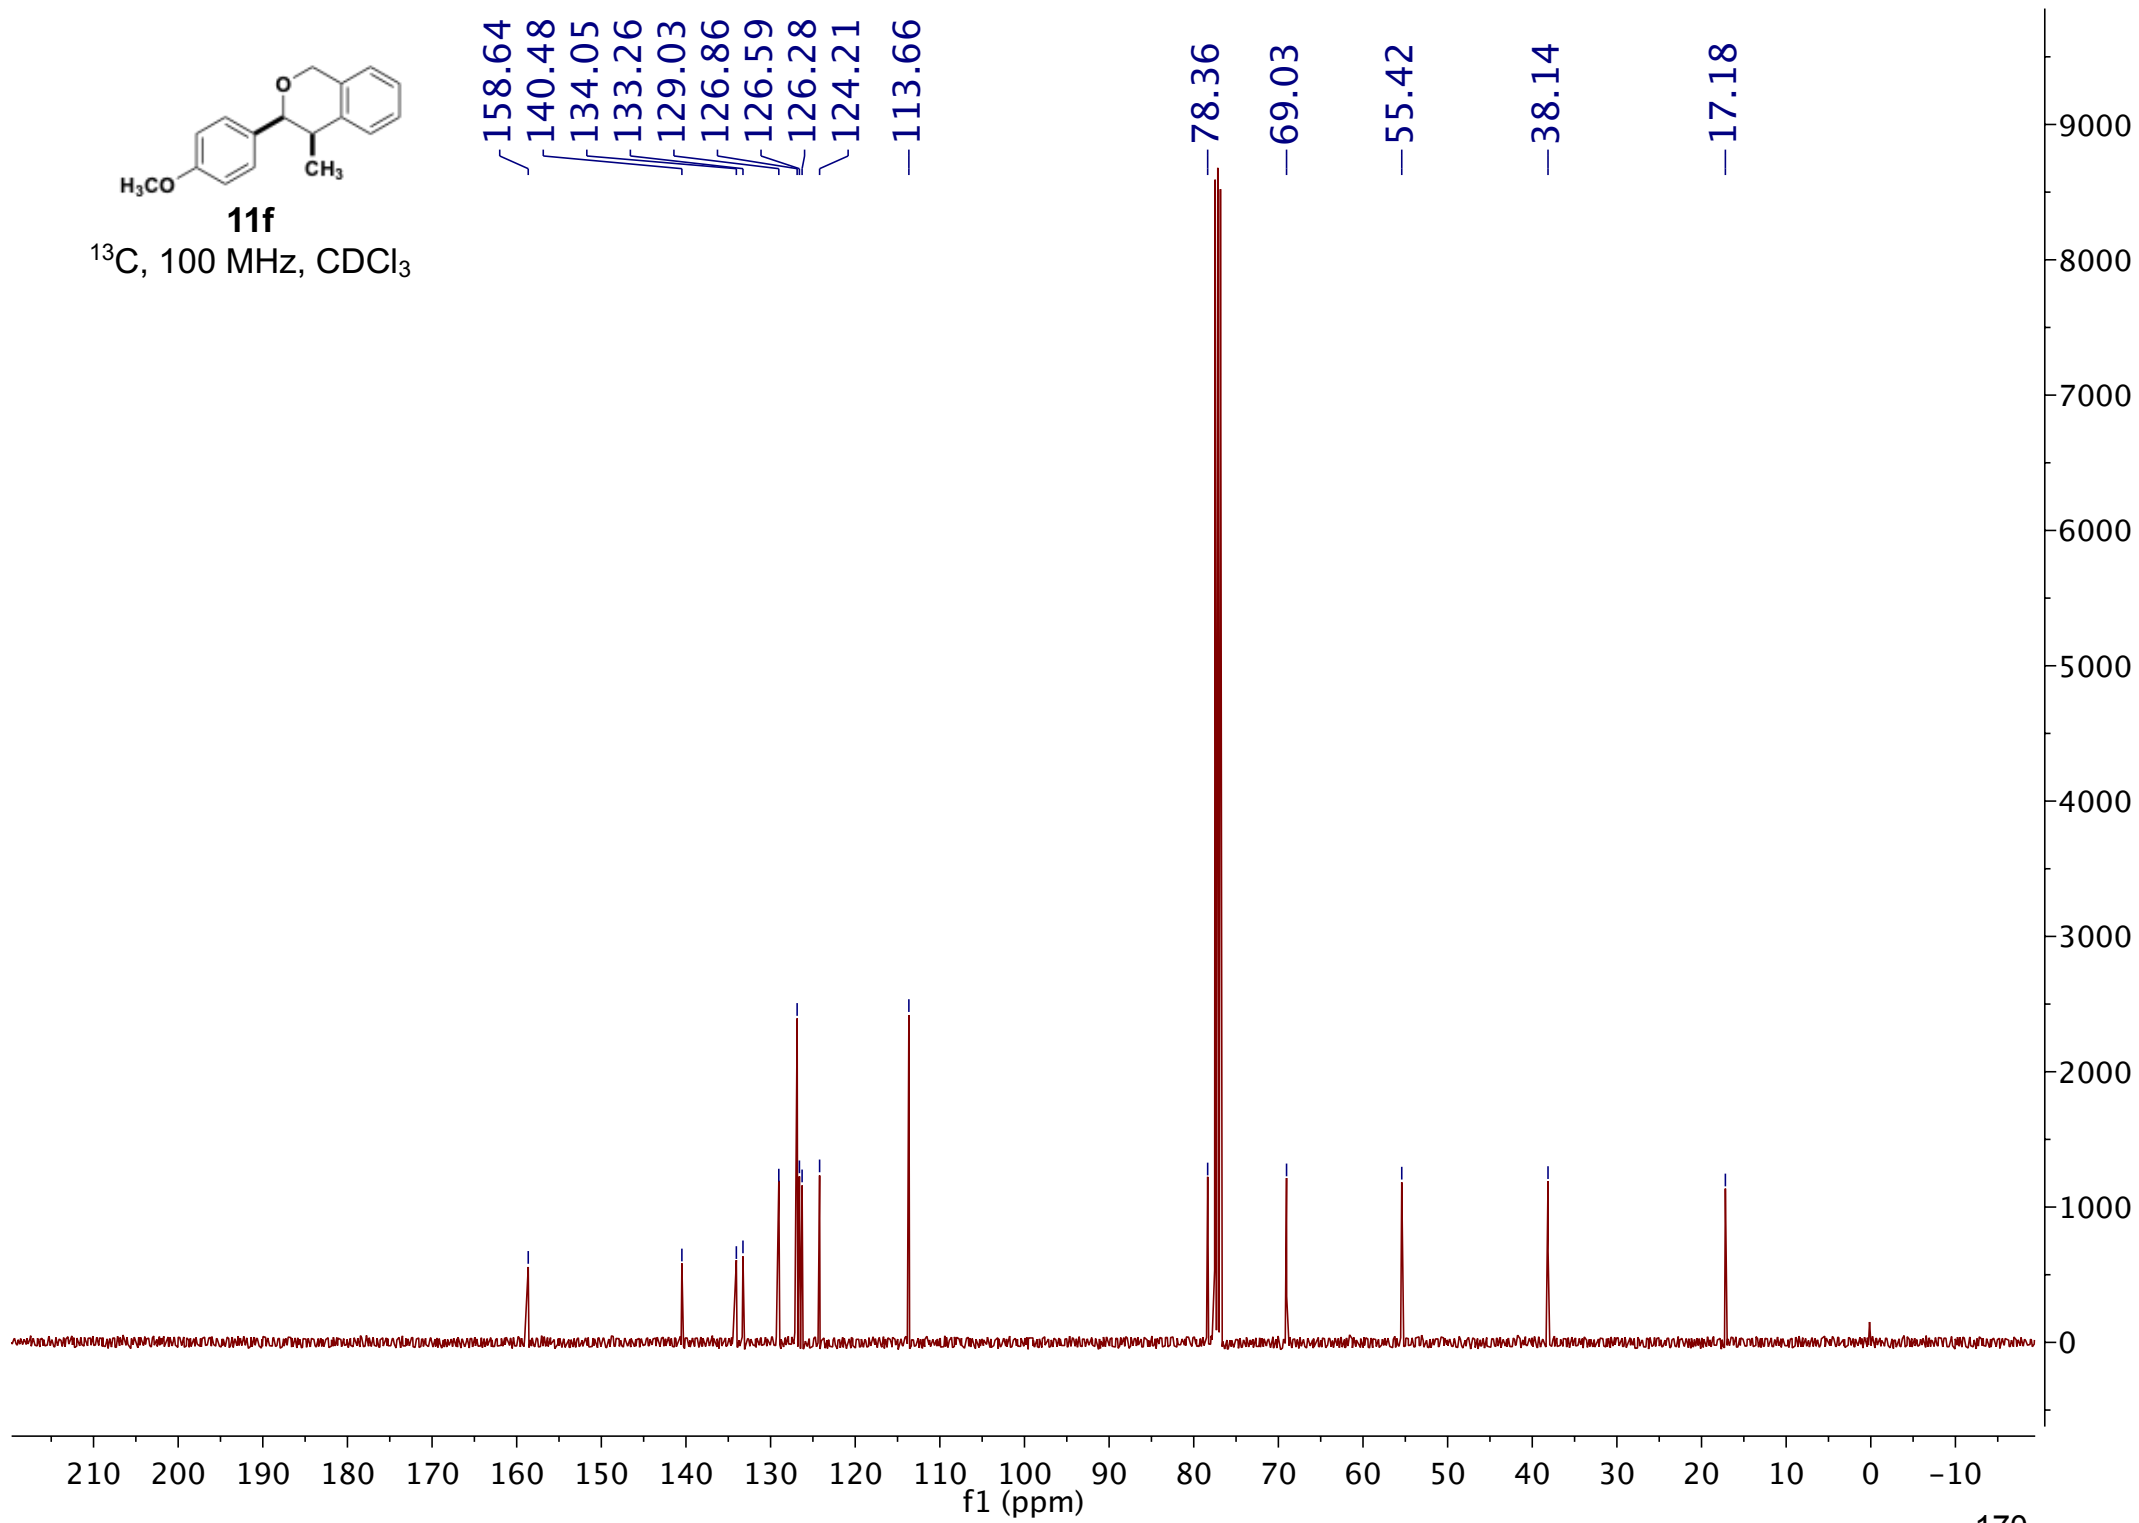



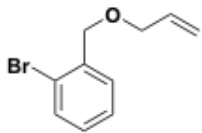

**46**

$^1\text{H}$ , 600 MHz,  $\text{CDCl}_3$

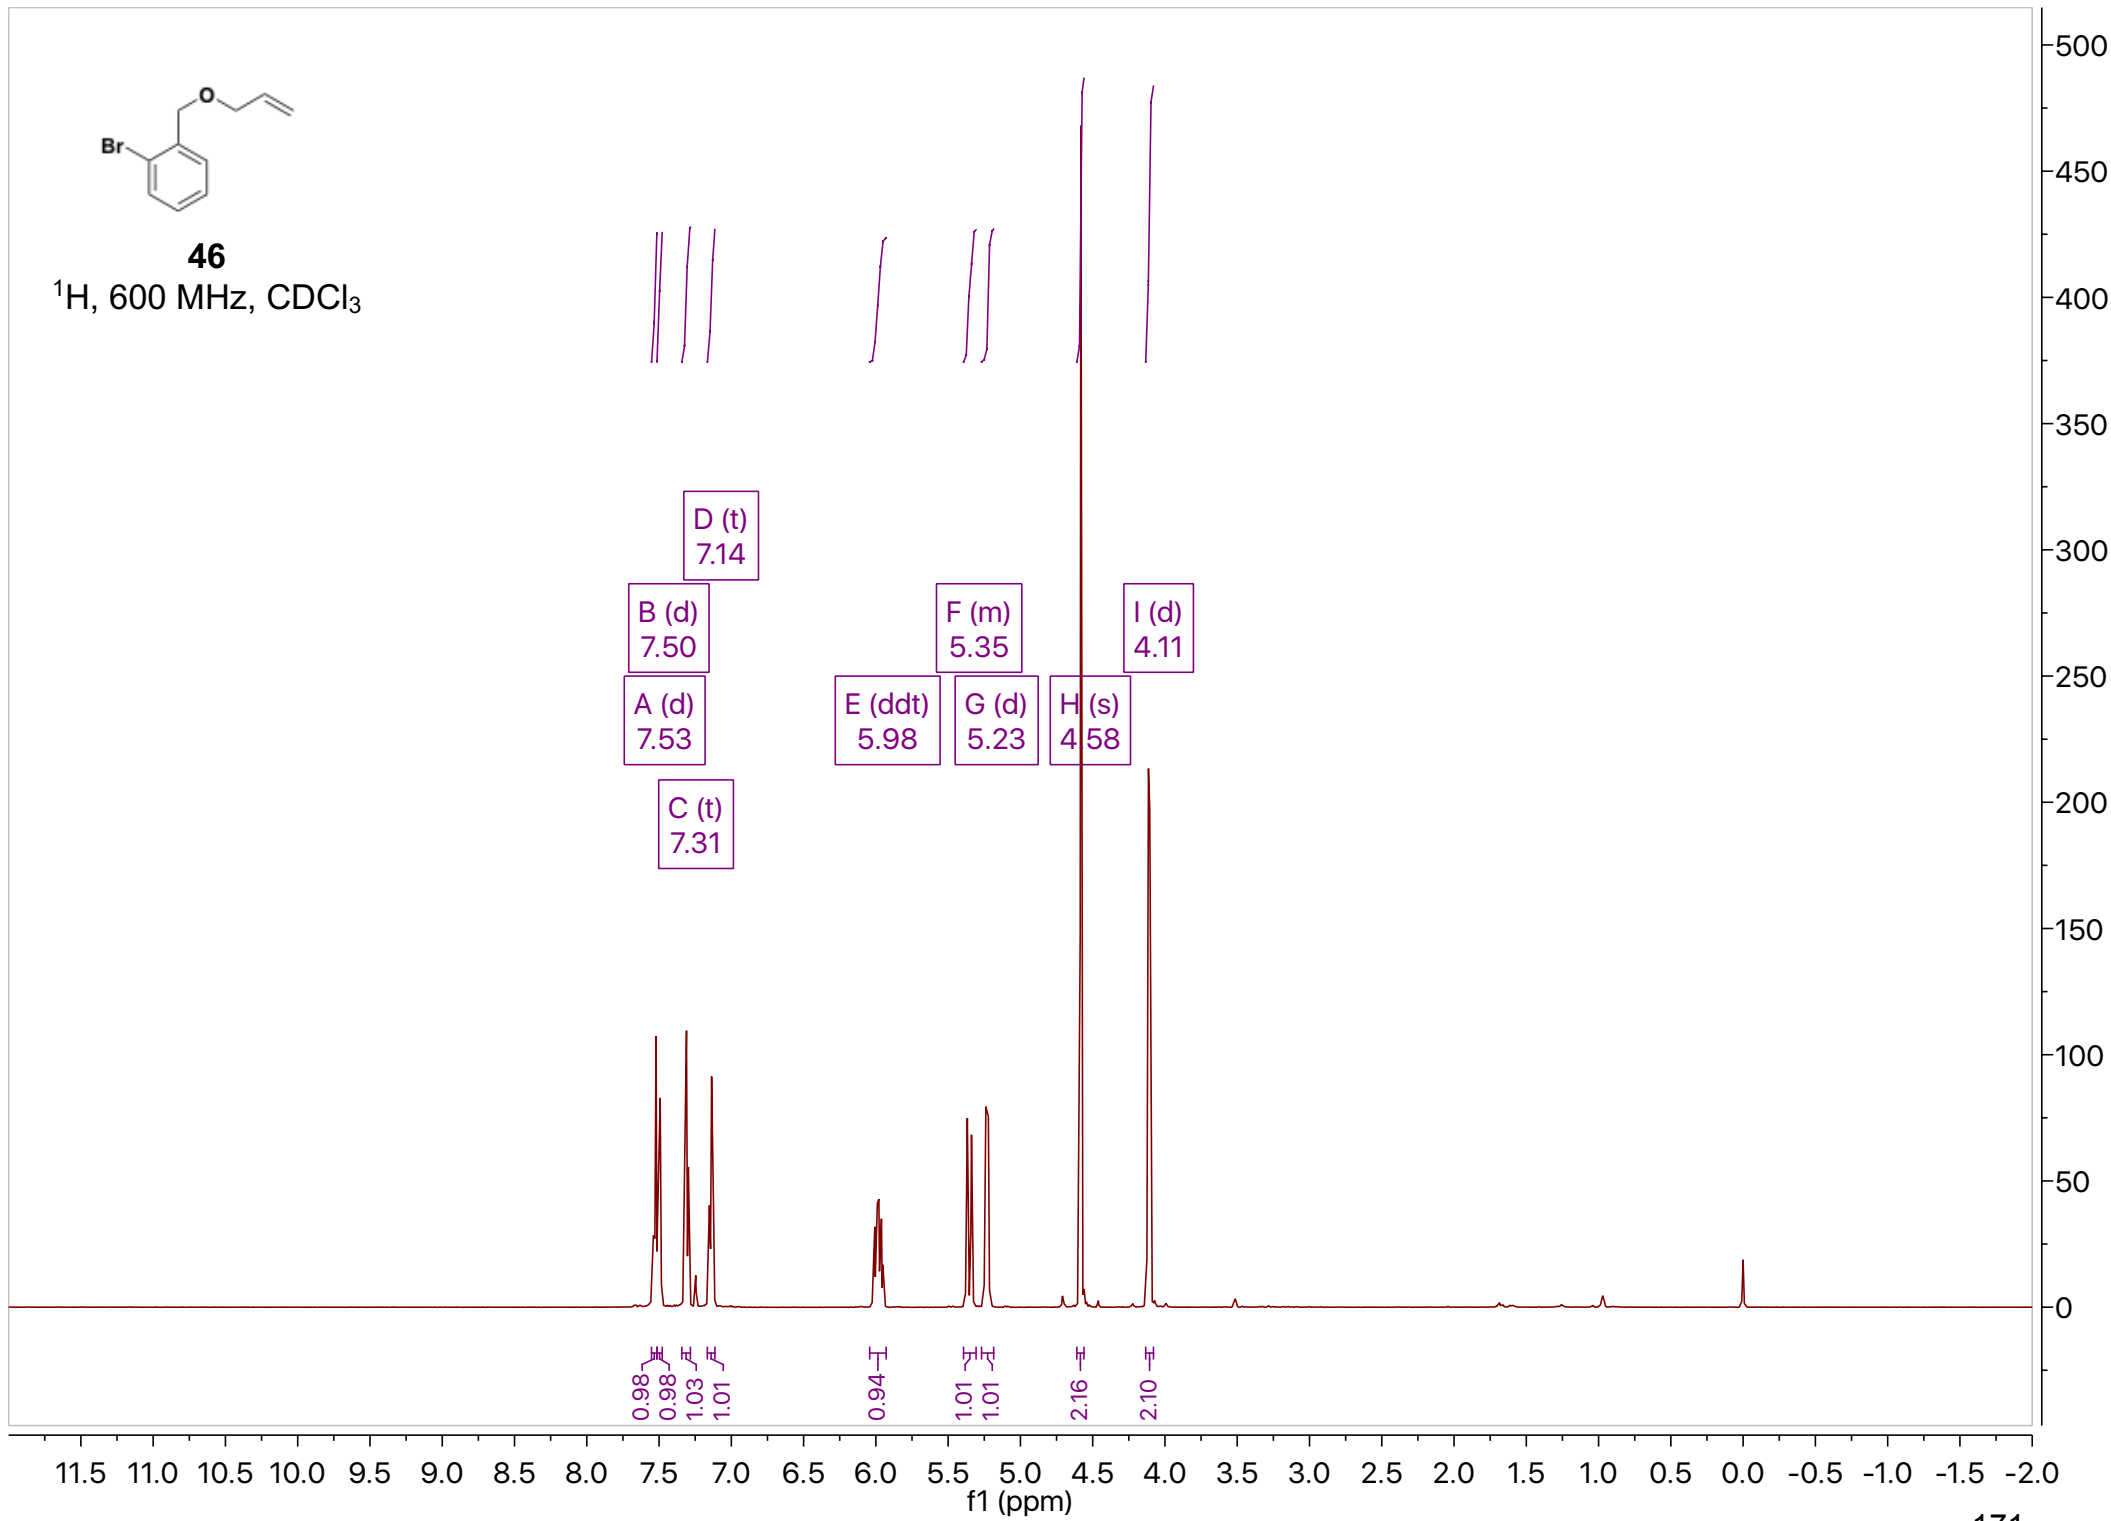



**46**

$^{13}\text{C}$ , 150 MHz,  $\text{CDCl}_3$

137.79  
134.60  
132.55  
129.04  
128.93  
127.48  
122.69  
117.40

71.78  
71.47

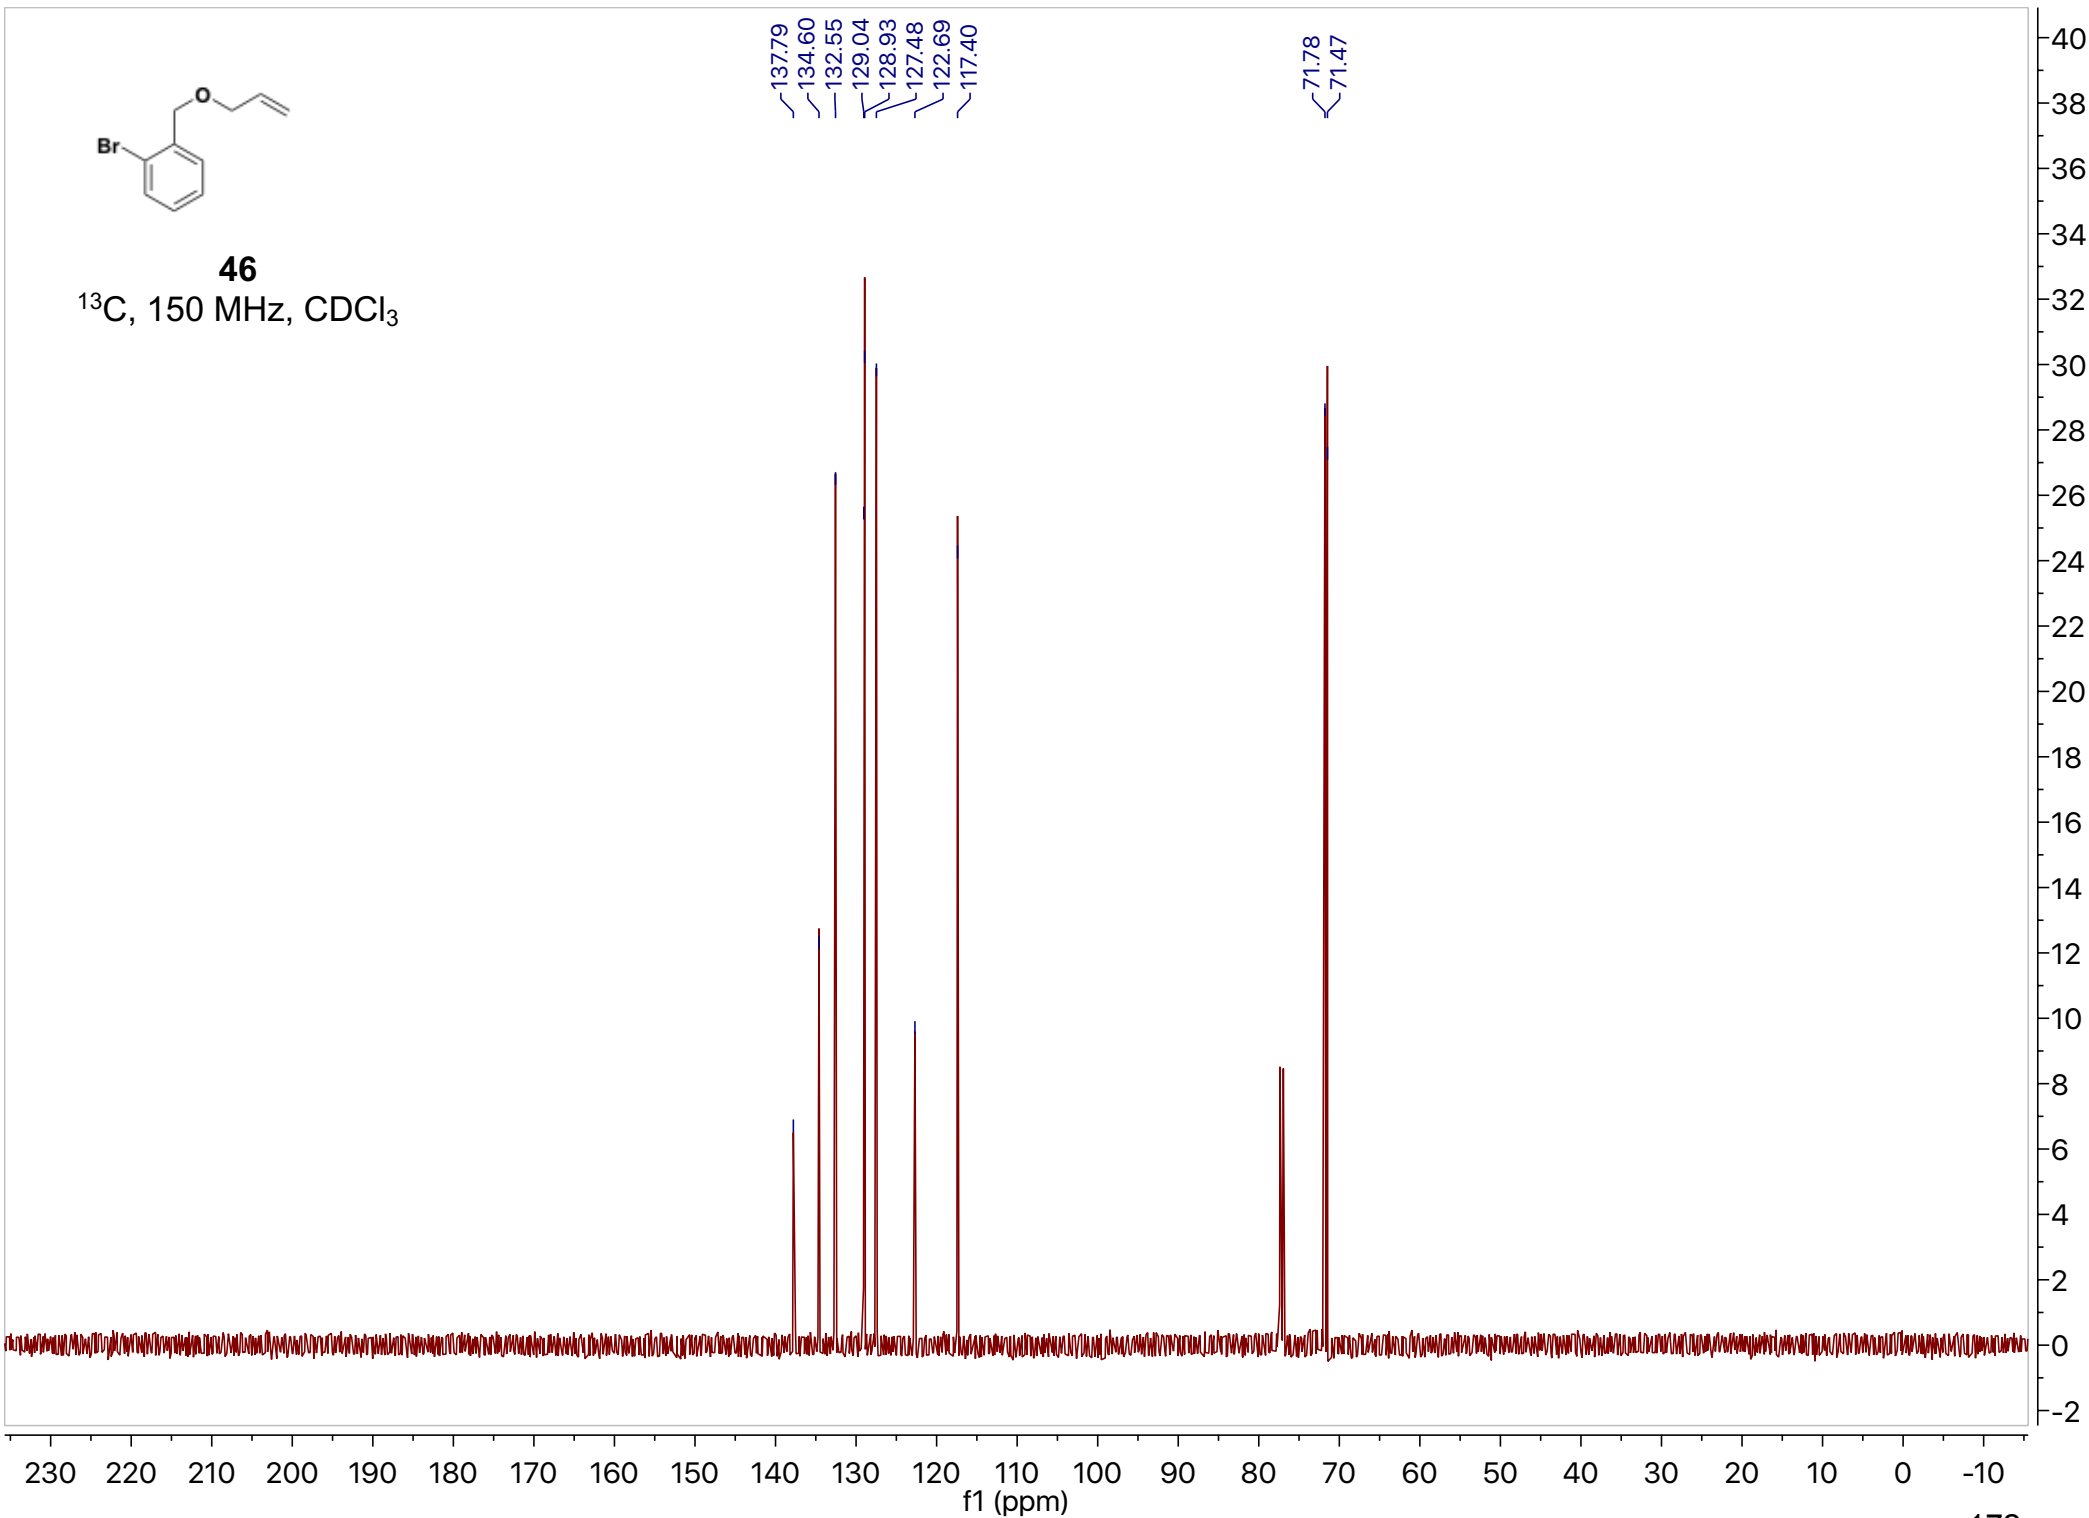

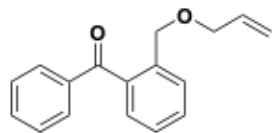

**47**

$^1\text{H}$ , 600 MHz,  $\text{CDCl}_3$

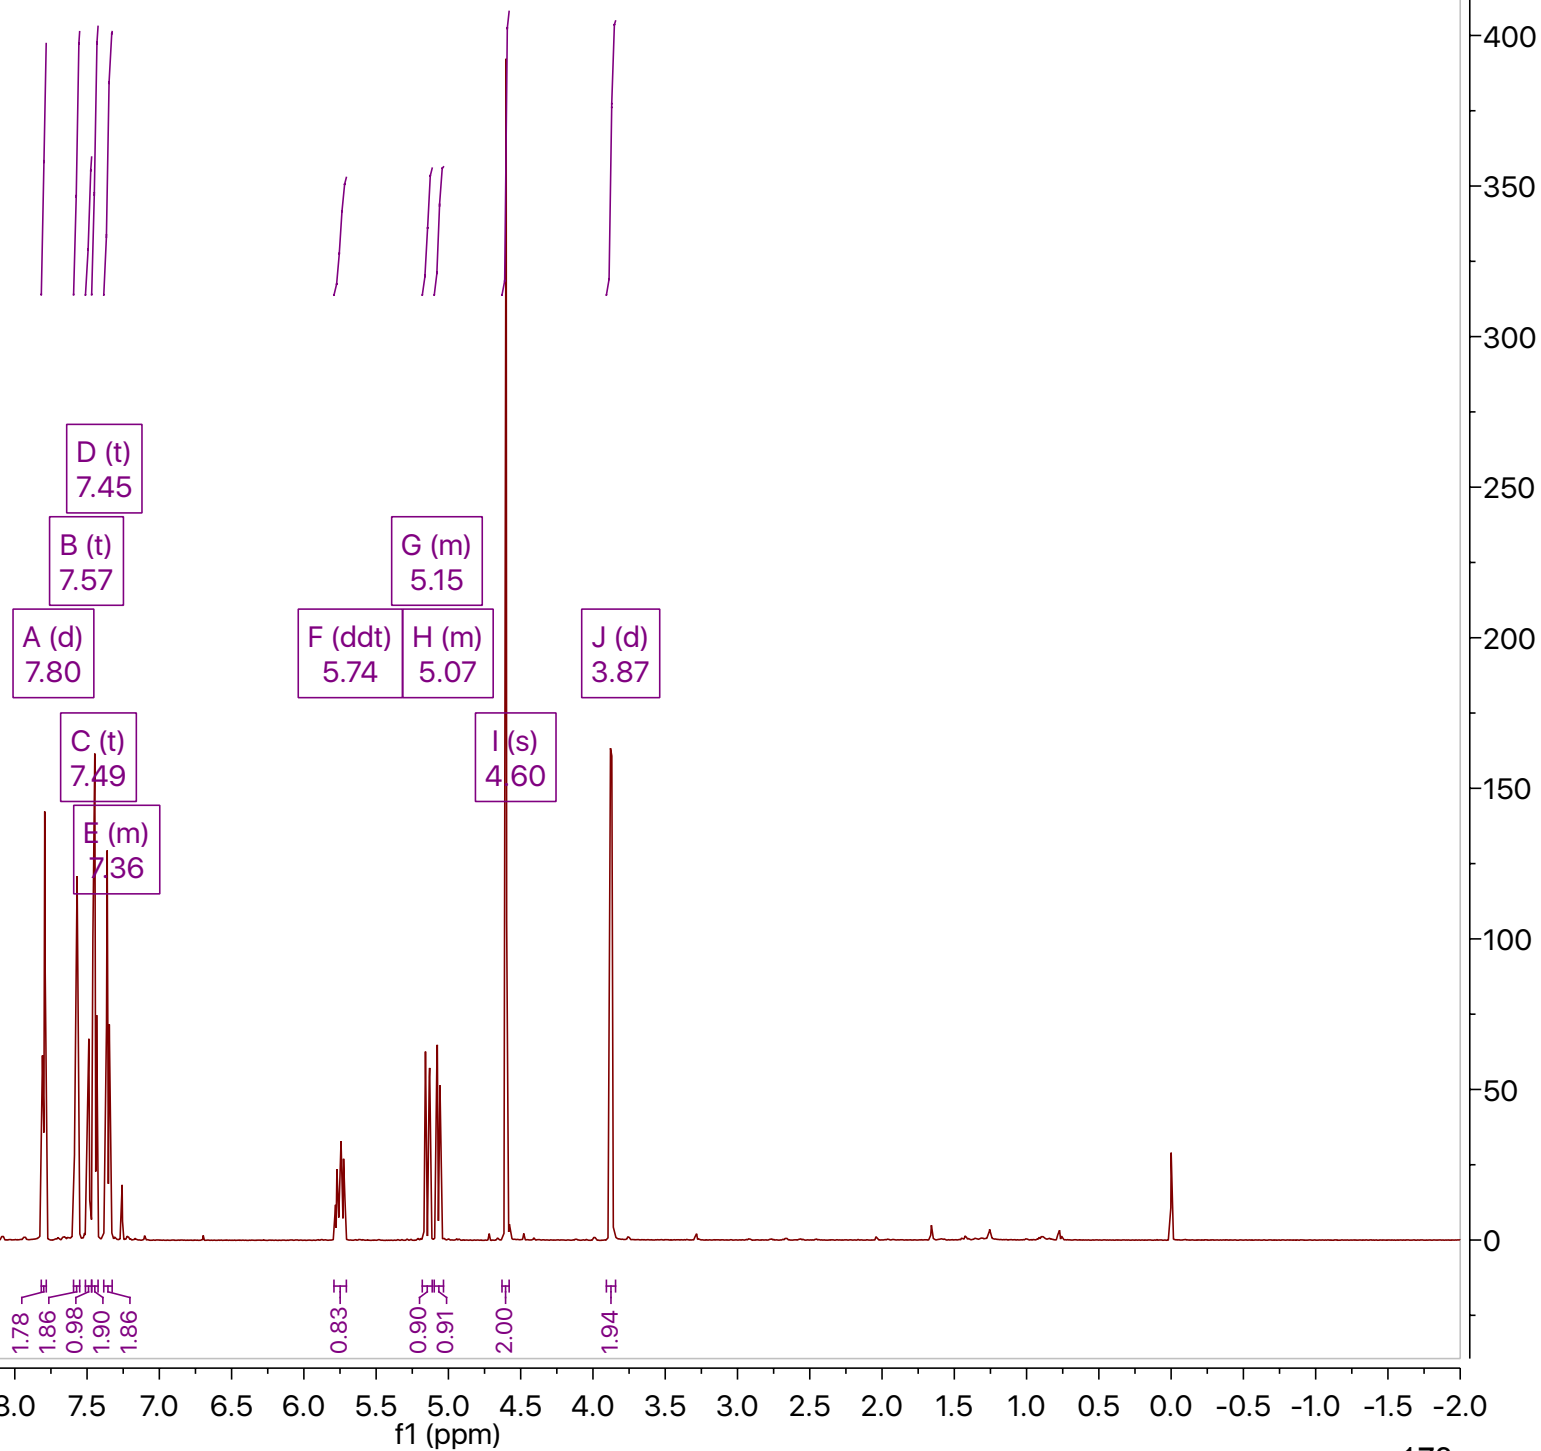

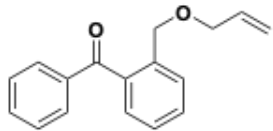

**47**

$^{13}\text{C}$ , 150 MHz,  $\text{CDCl}_3$

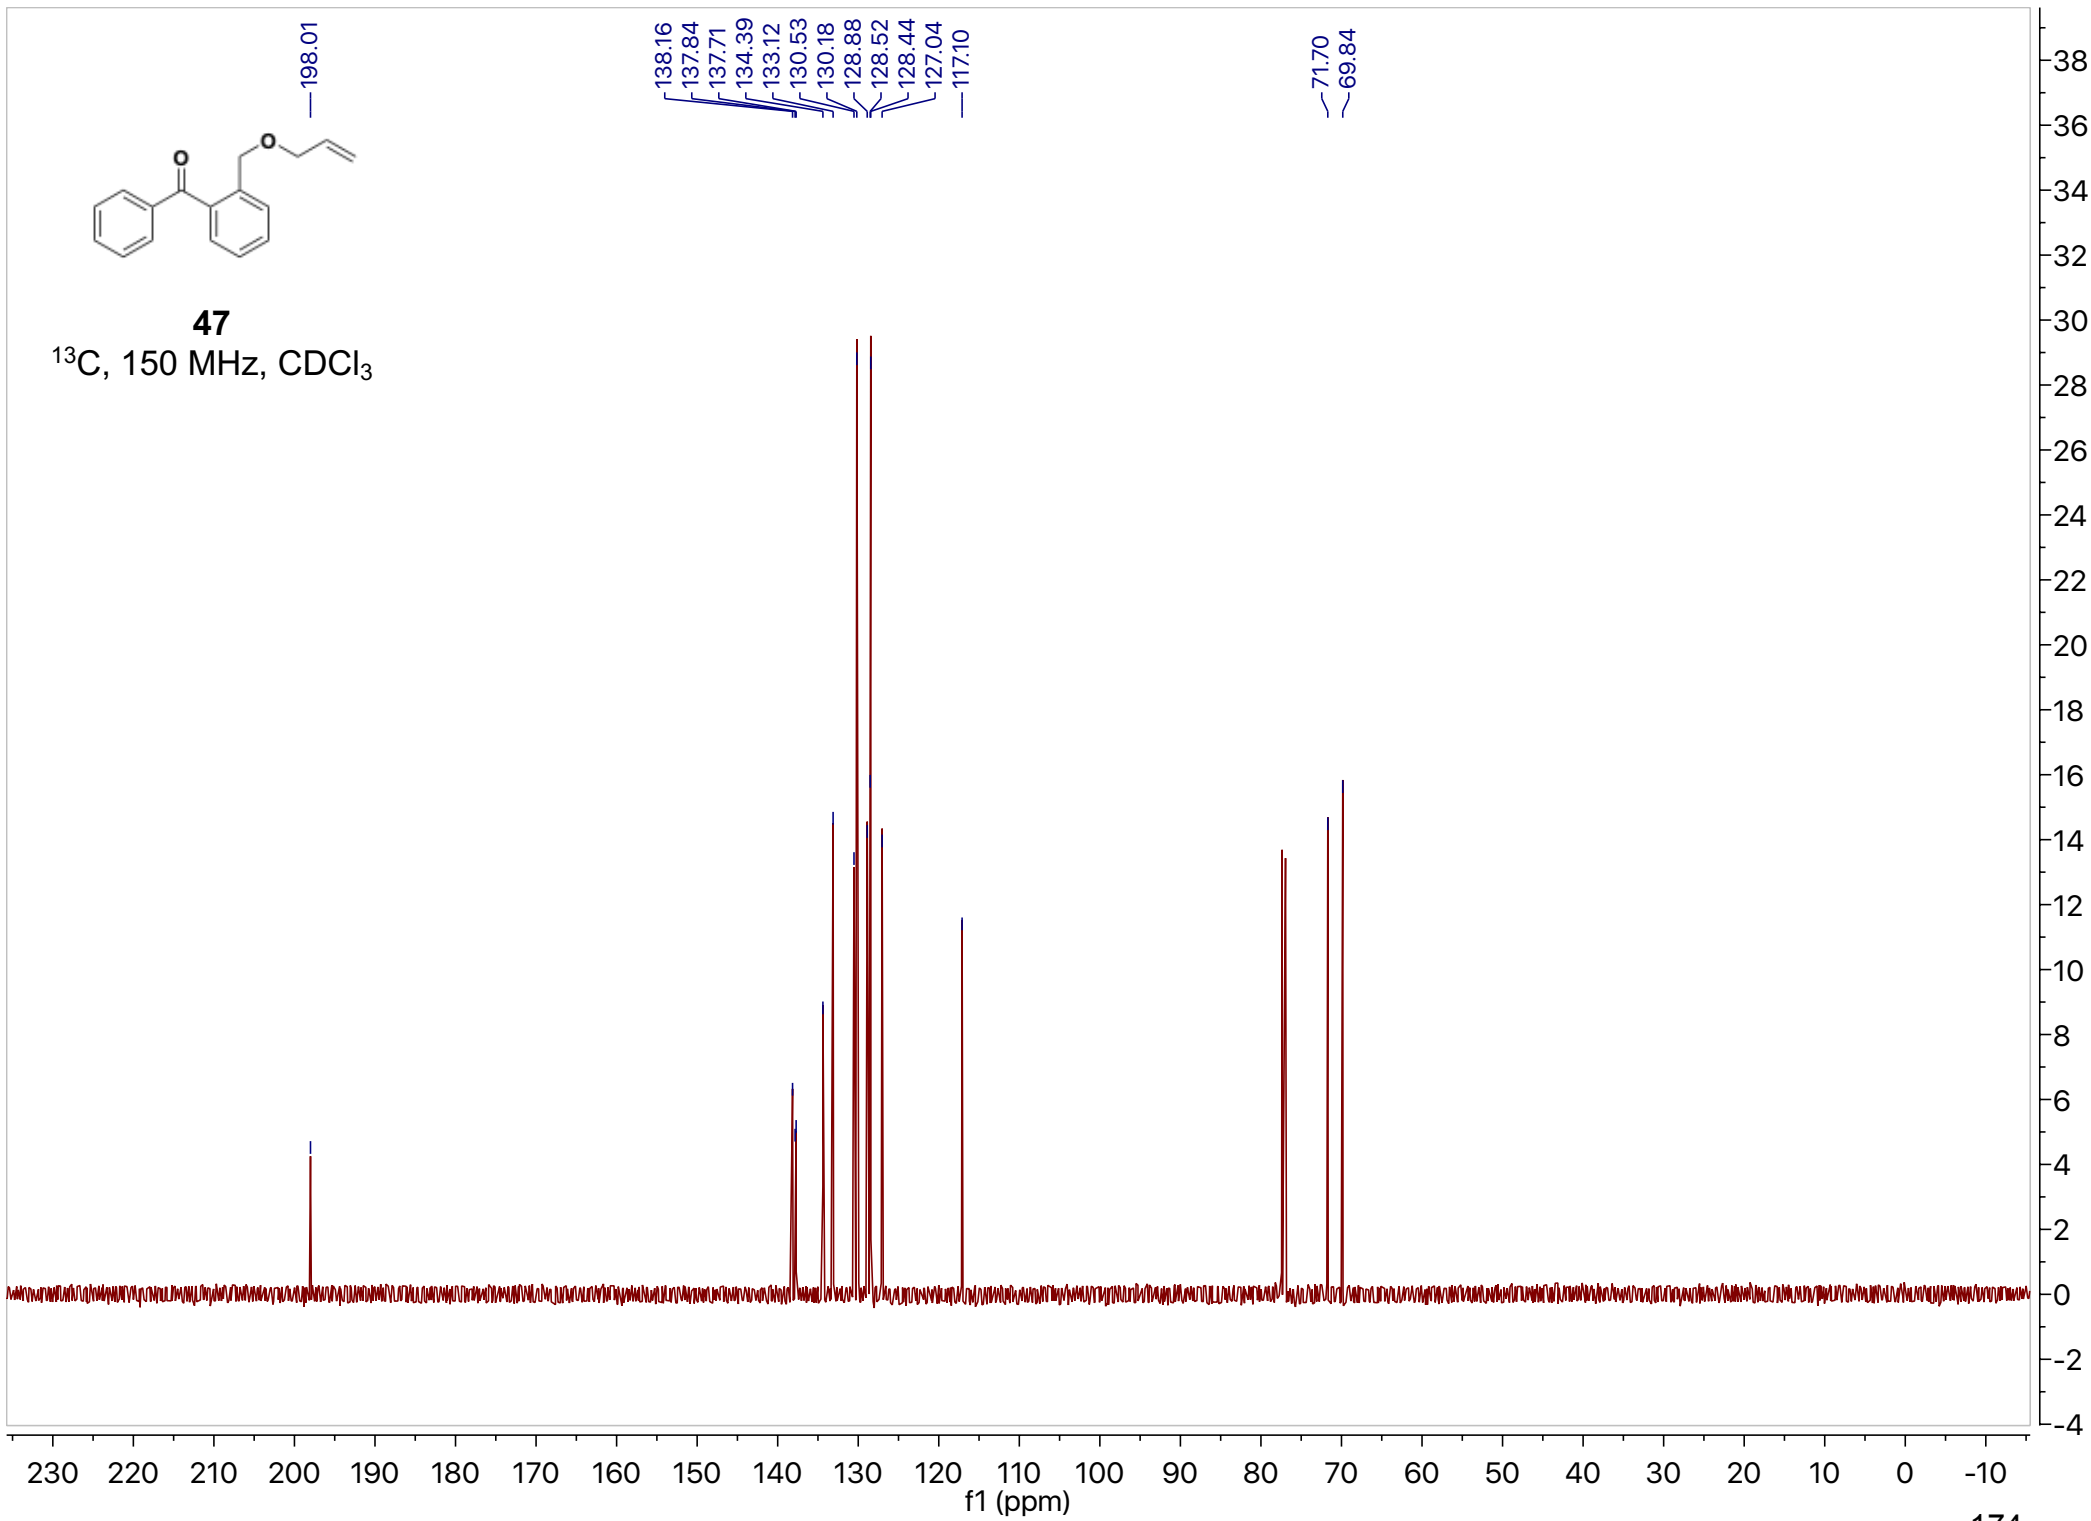

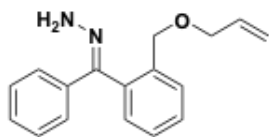

**12a**

$^1\text{H}$ , 400 MHz,  $\text{CDCl}_3$

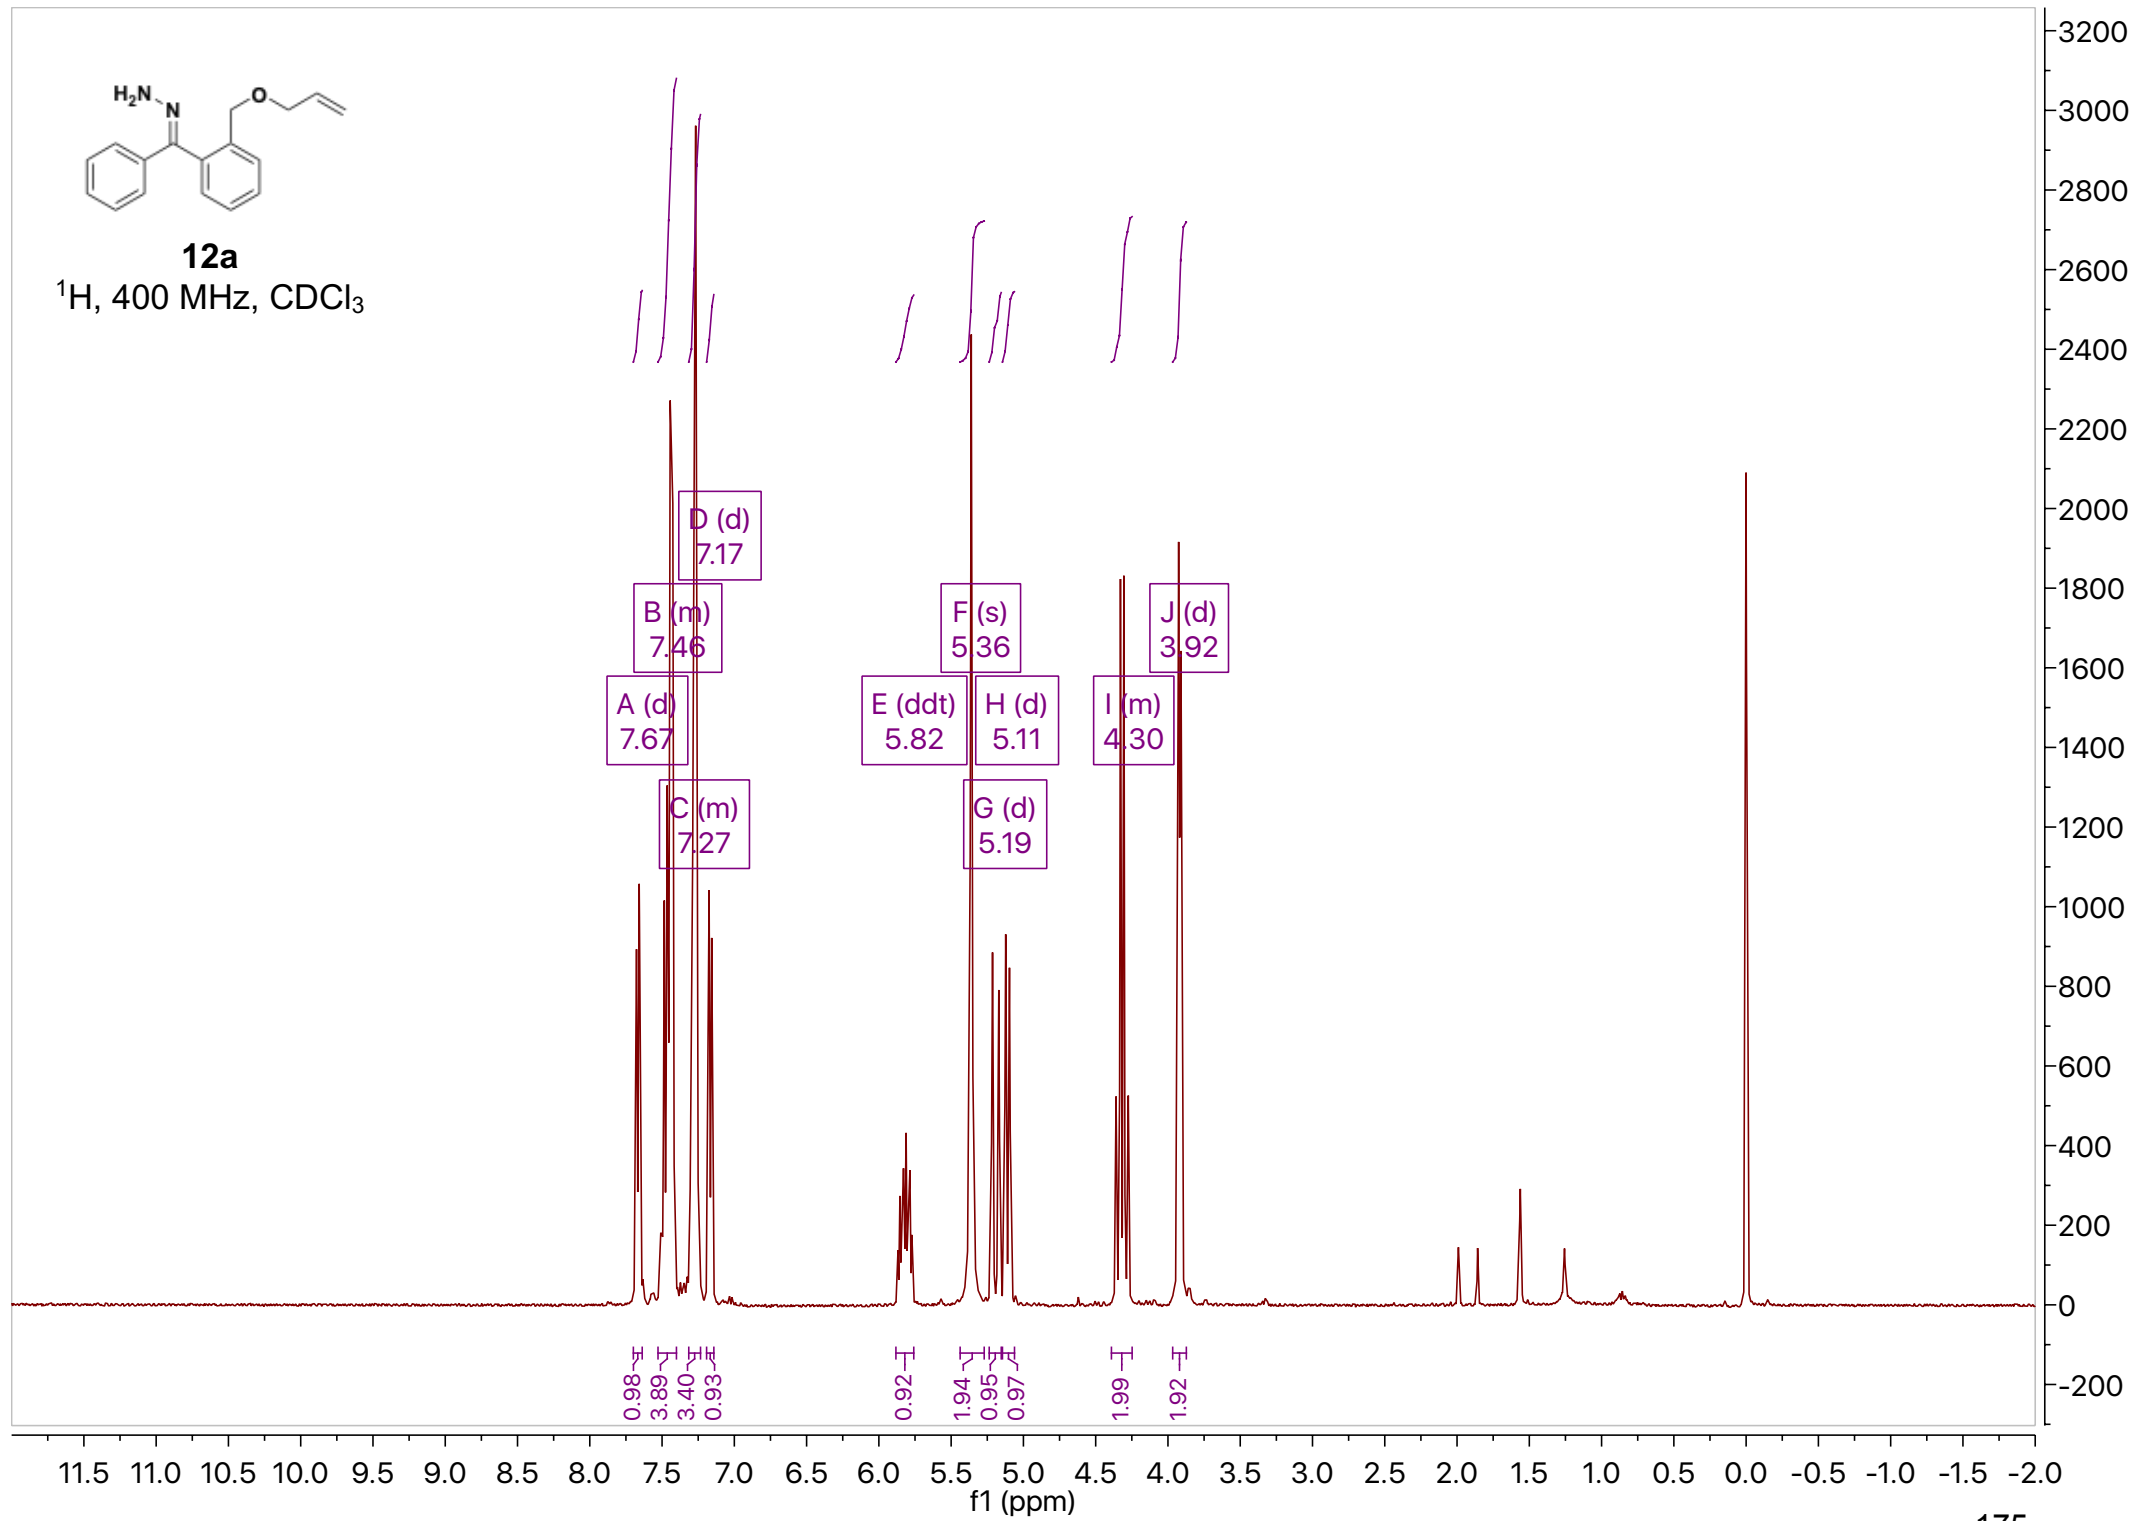

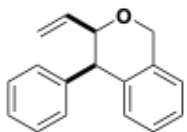

**13a**

<sup>1</sup>H, 400 MHz, CDCl<sub>3</sub>

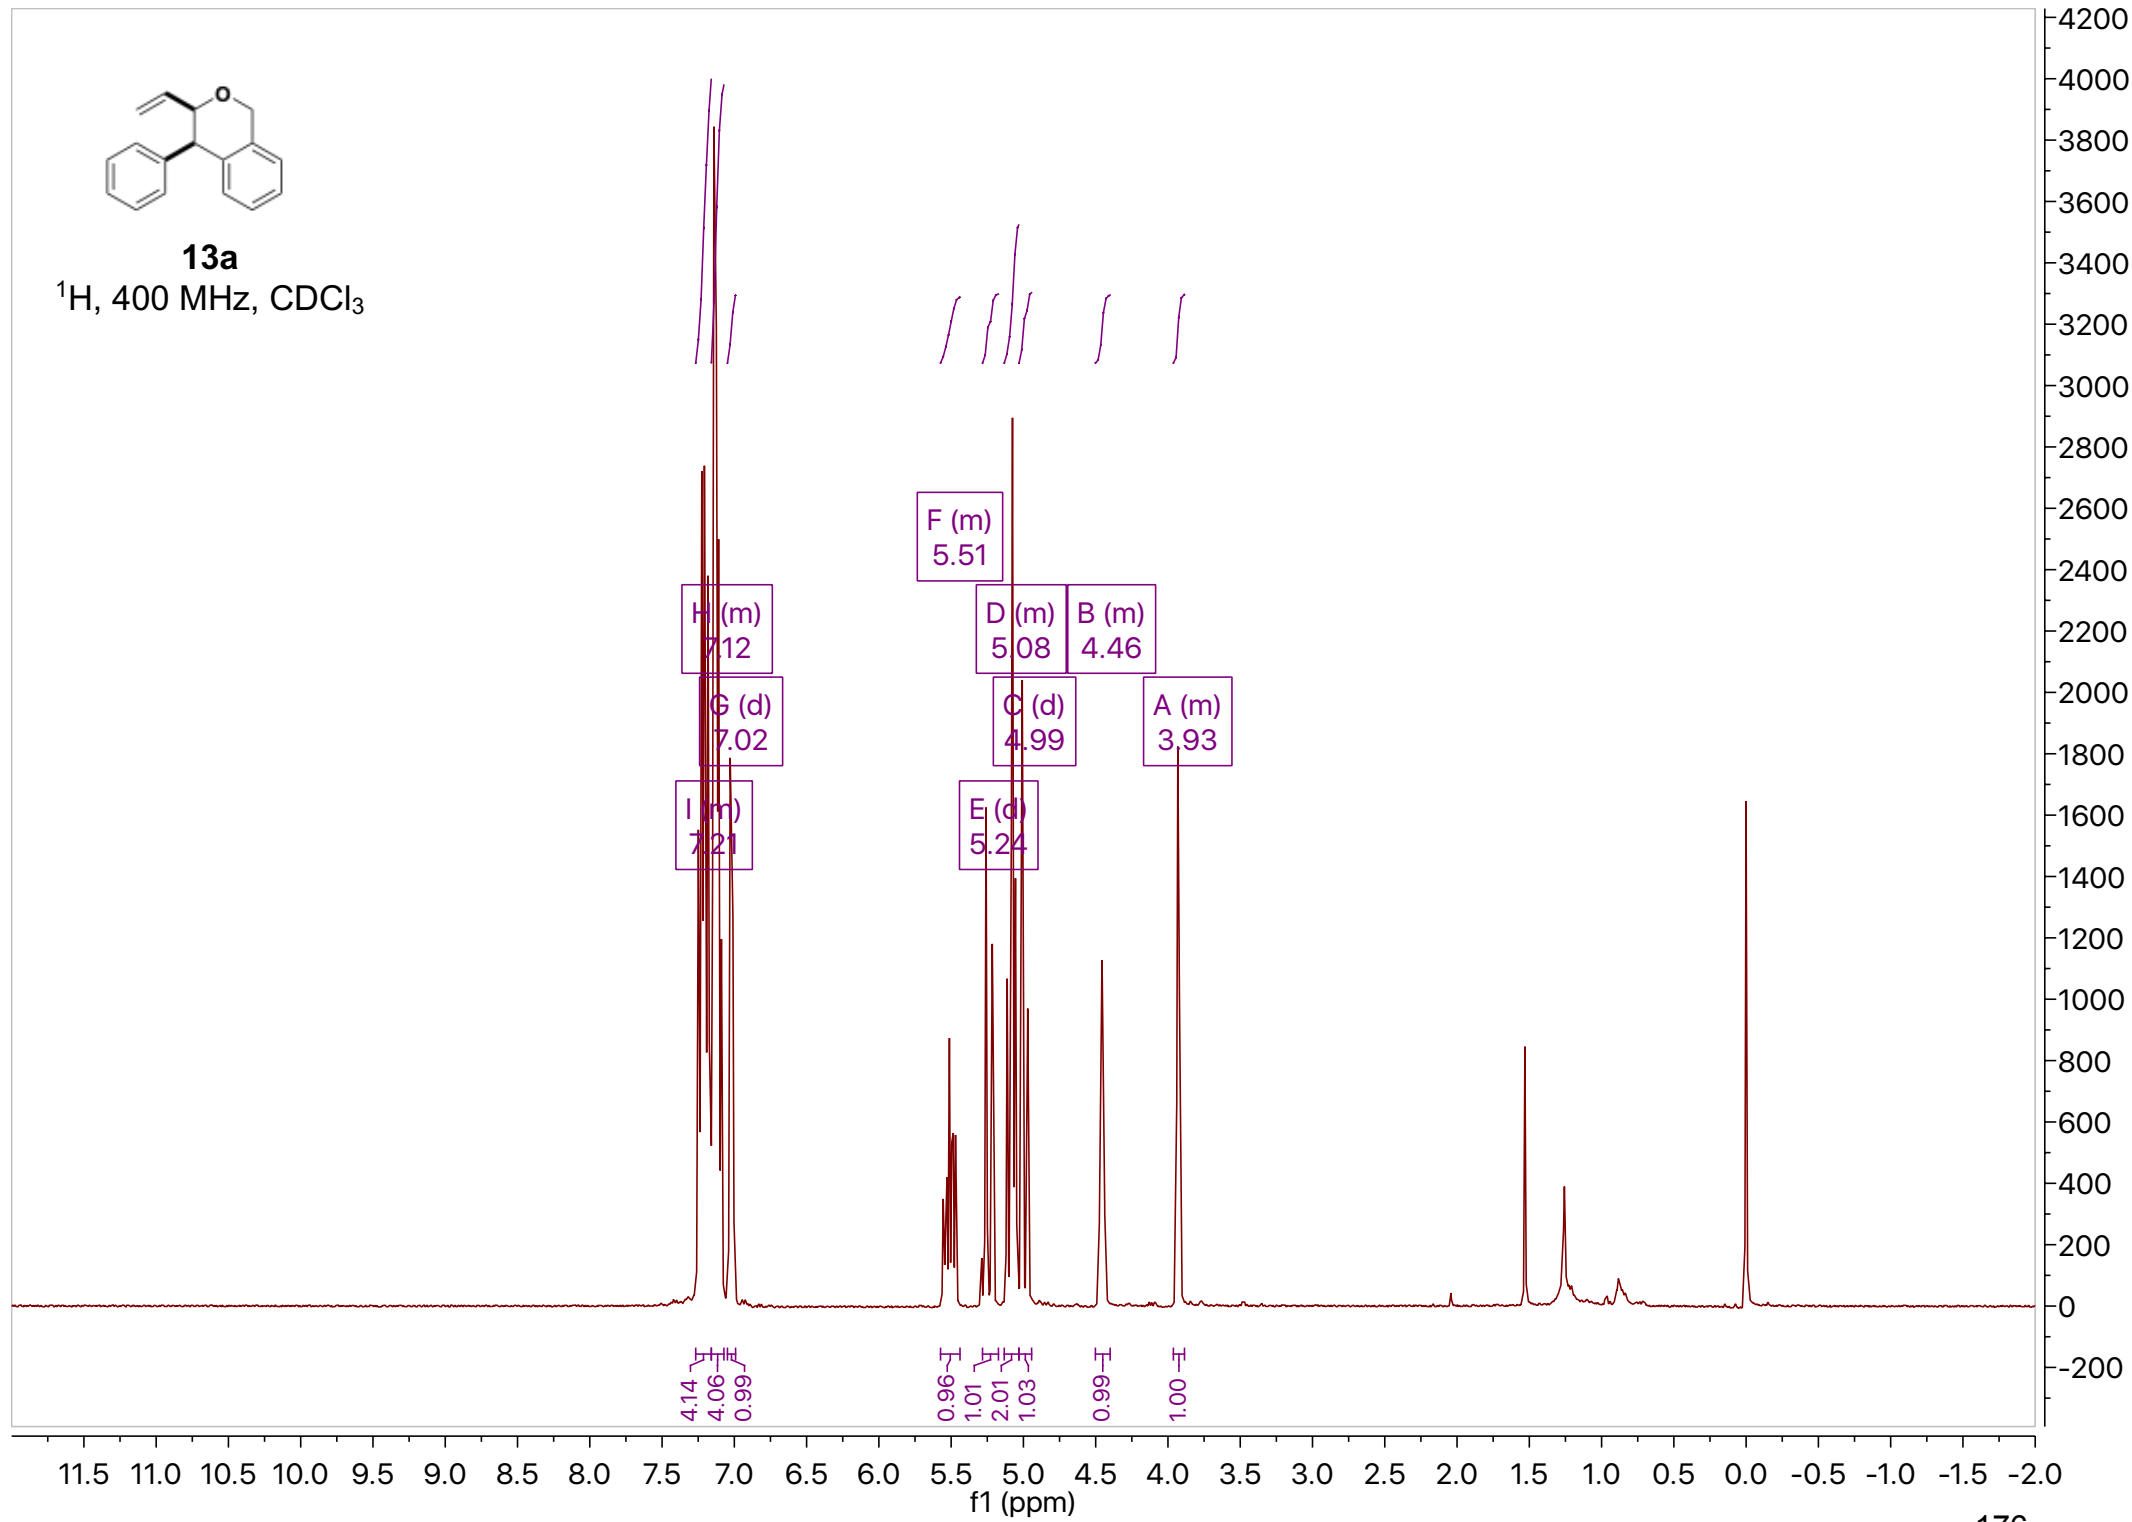

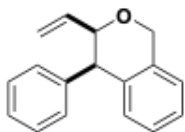

**13a**

$^{13}\text{C}$ , 100 MHz,  $\text{CDCl}_3$

141.71  
137.06  
137.03  
134.11  
130.29  
130.12  
127.96  
126.96  
126.63  
126.54  
124.18  
116.43

79.29

68.52

48.74

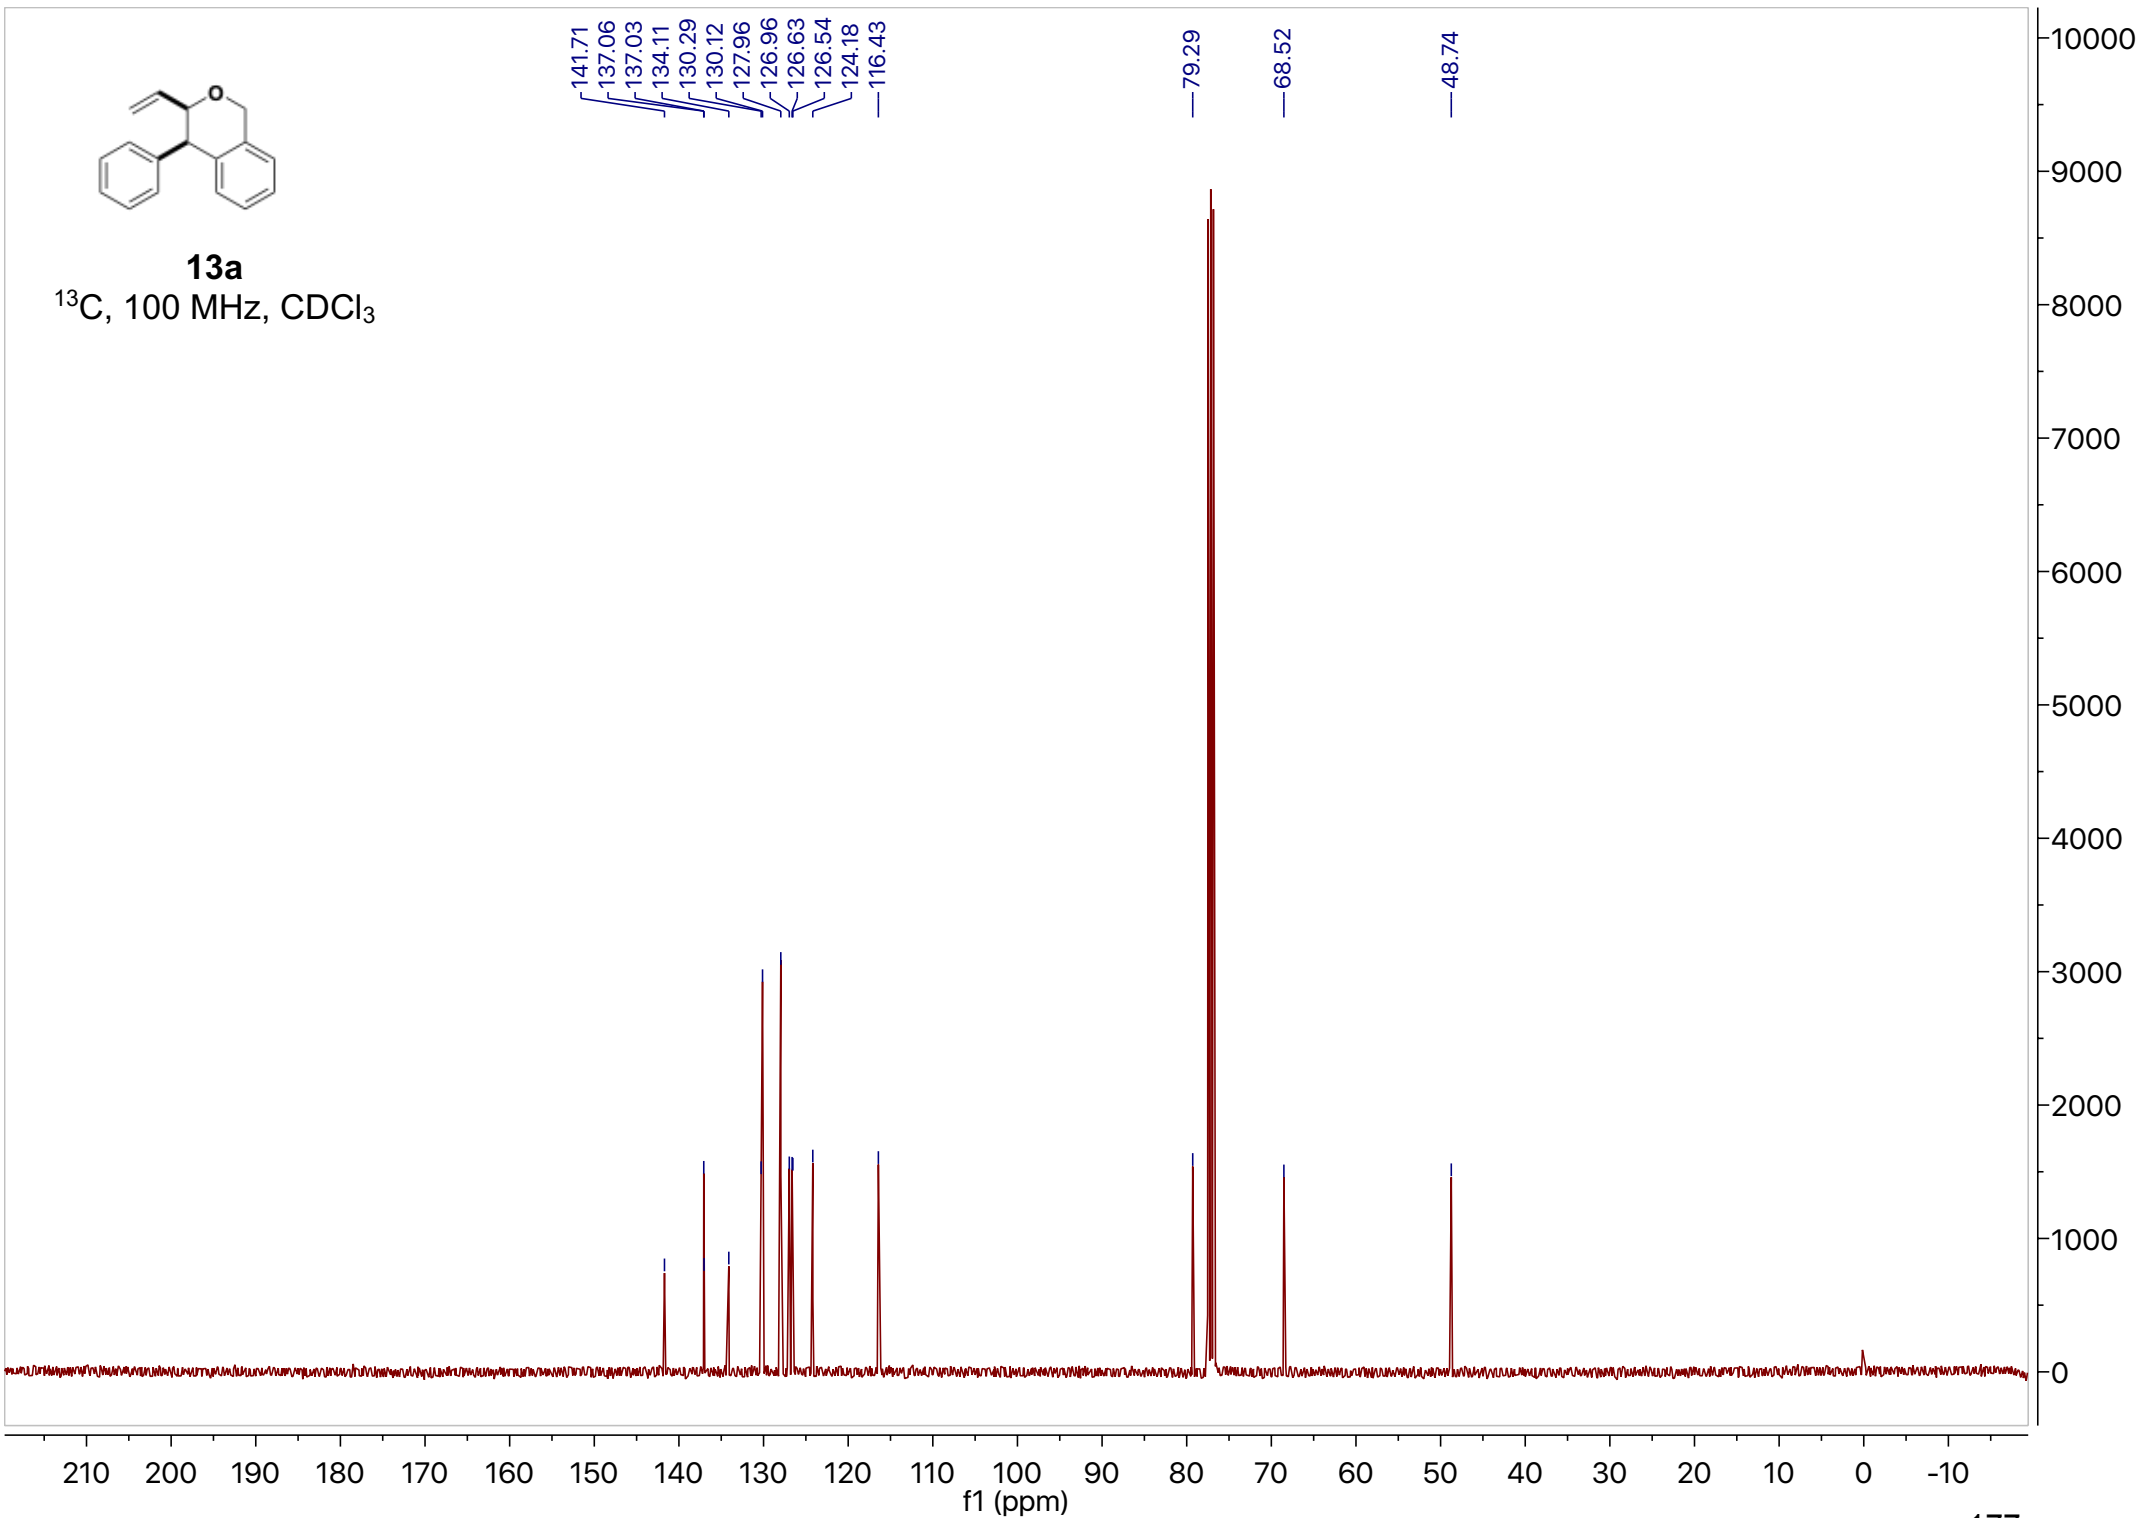

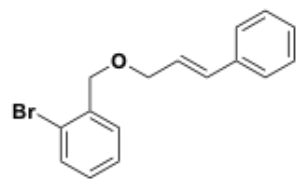

**48**

$^1\text{H}$ , 600 MHz,  $\text{CDCl}_3$

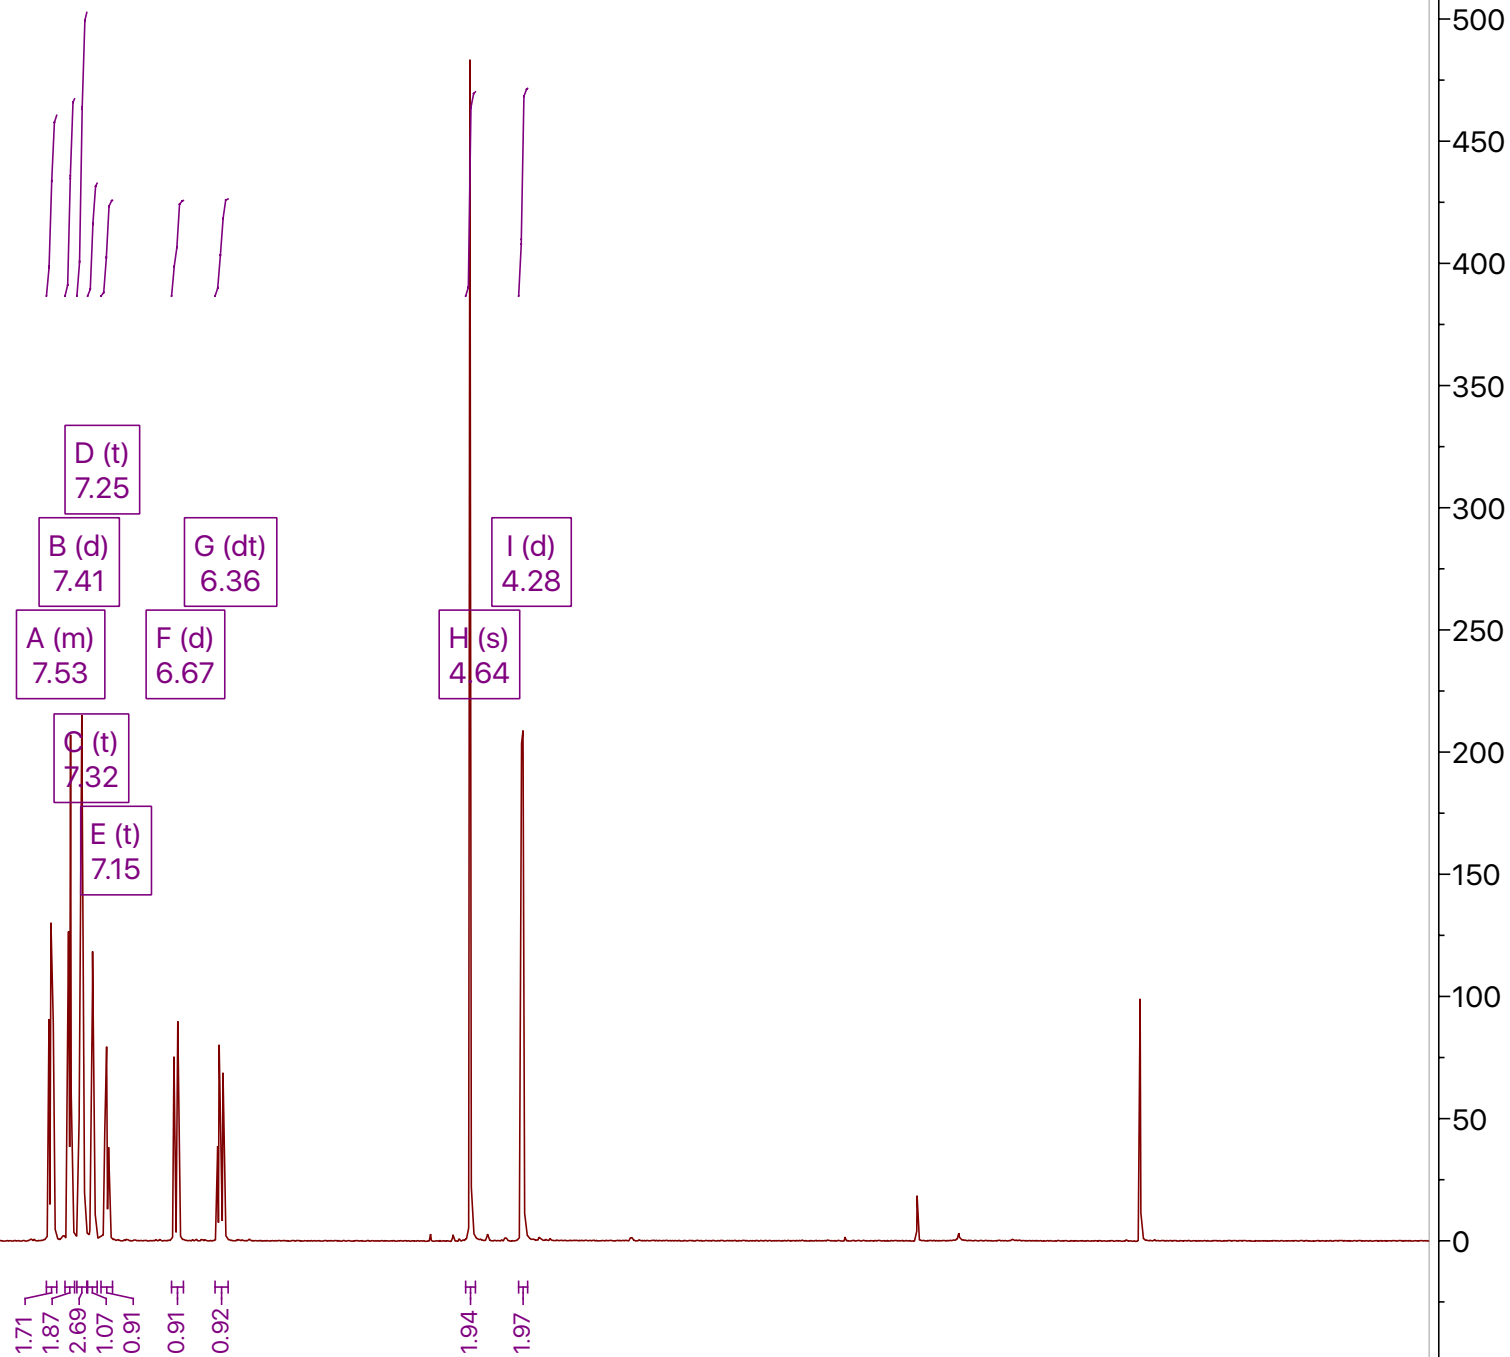



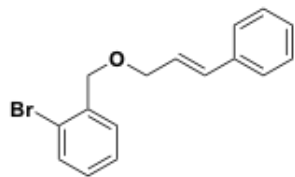

**48**

$^{13}\text{C}$ , 100 MHz,  $\text{CDCl}_3$

137.83  
136.81  
132.80  
132.67  
129.27  
129.06  
128.70  
127.86  
127.56  
126.67  
125.97  
122.91

71.59  
71.47

210 200 190 180 170 160 150 140 130 120 110 100 90 80 70 60 50 40 30 20 10 0 -10

f1 (ppm)

179

10000  
9000  
8000  
7000  
6000  
5000  
4000  
3000  
2000  
1000  
0

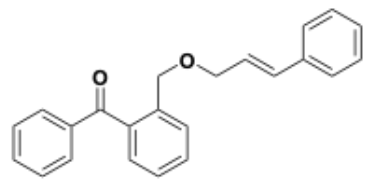

**49**

<sup>1</sup>H, 400 MHz, CDCl<sub>3</sub>

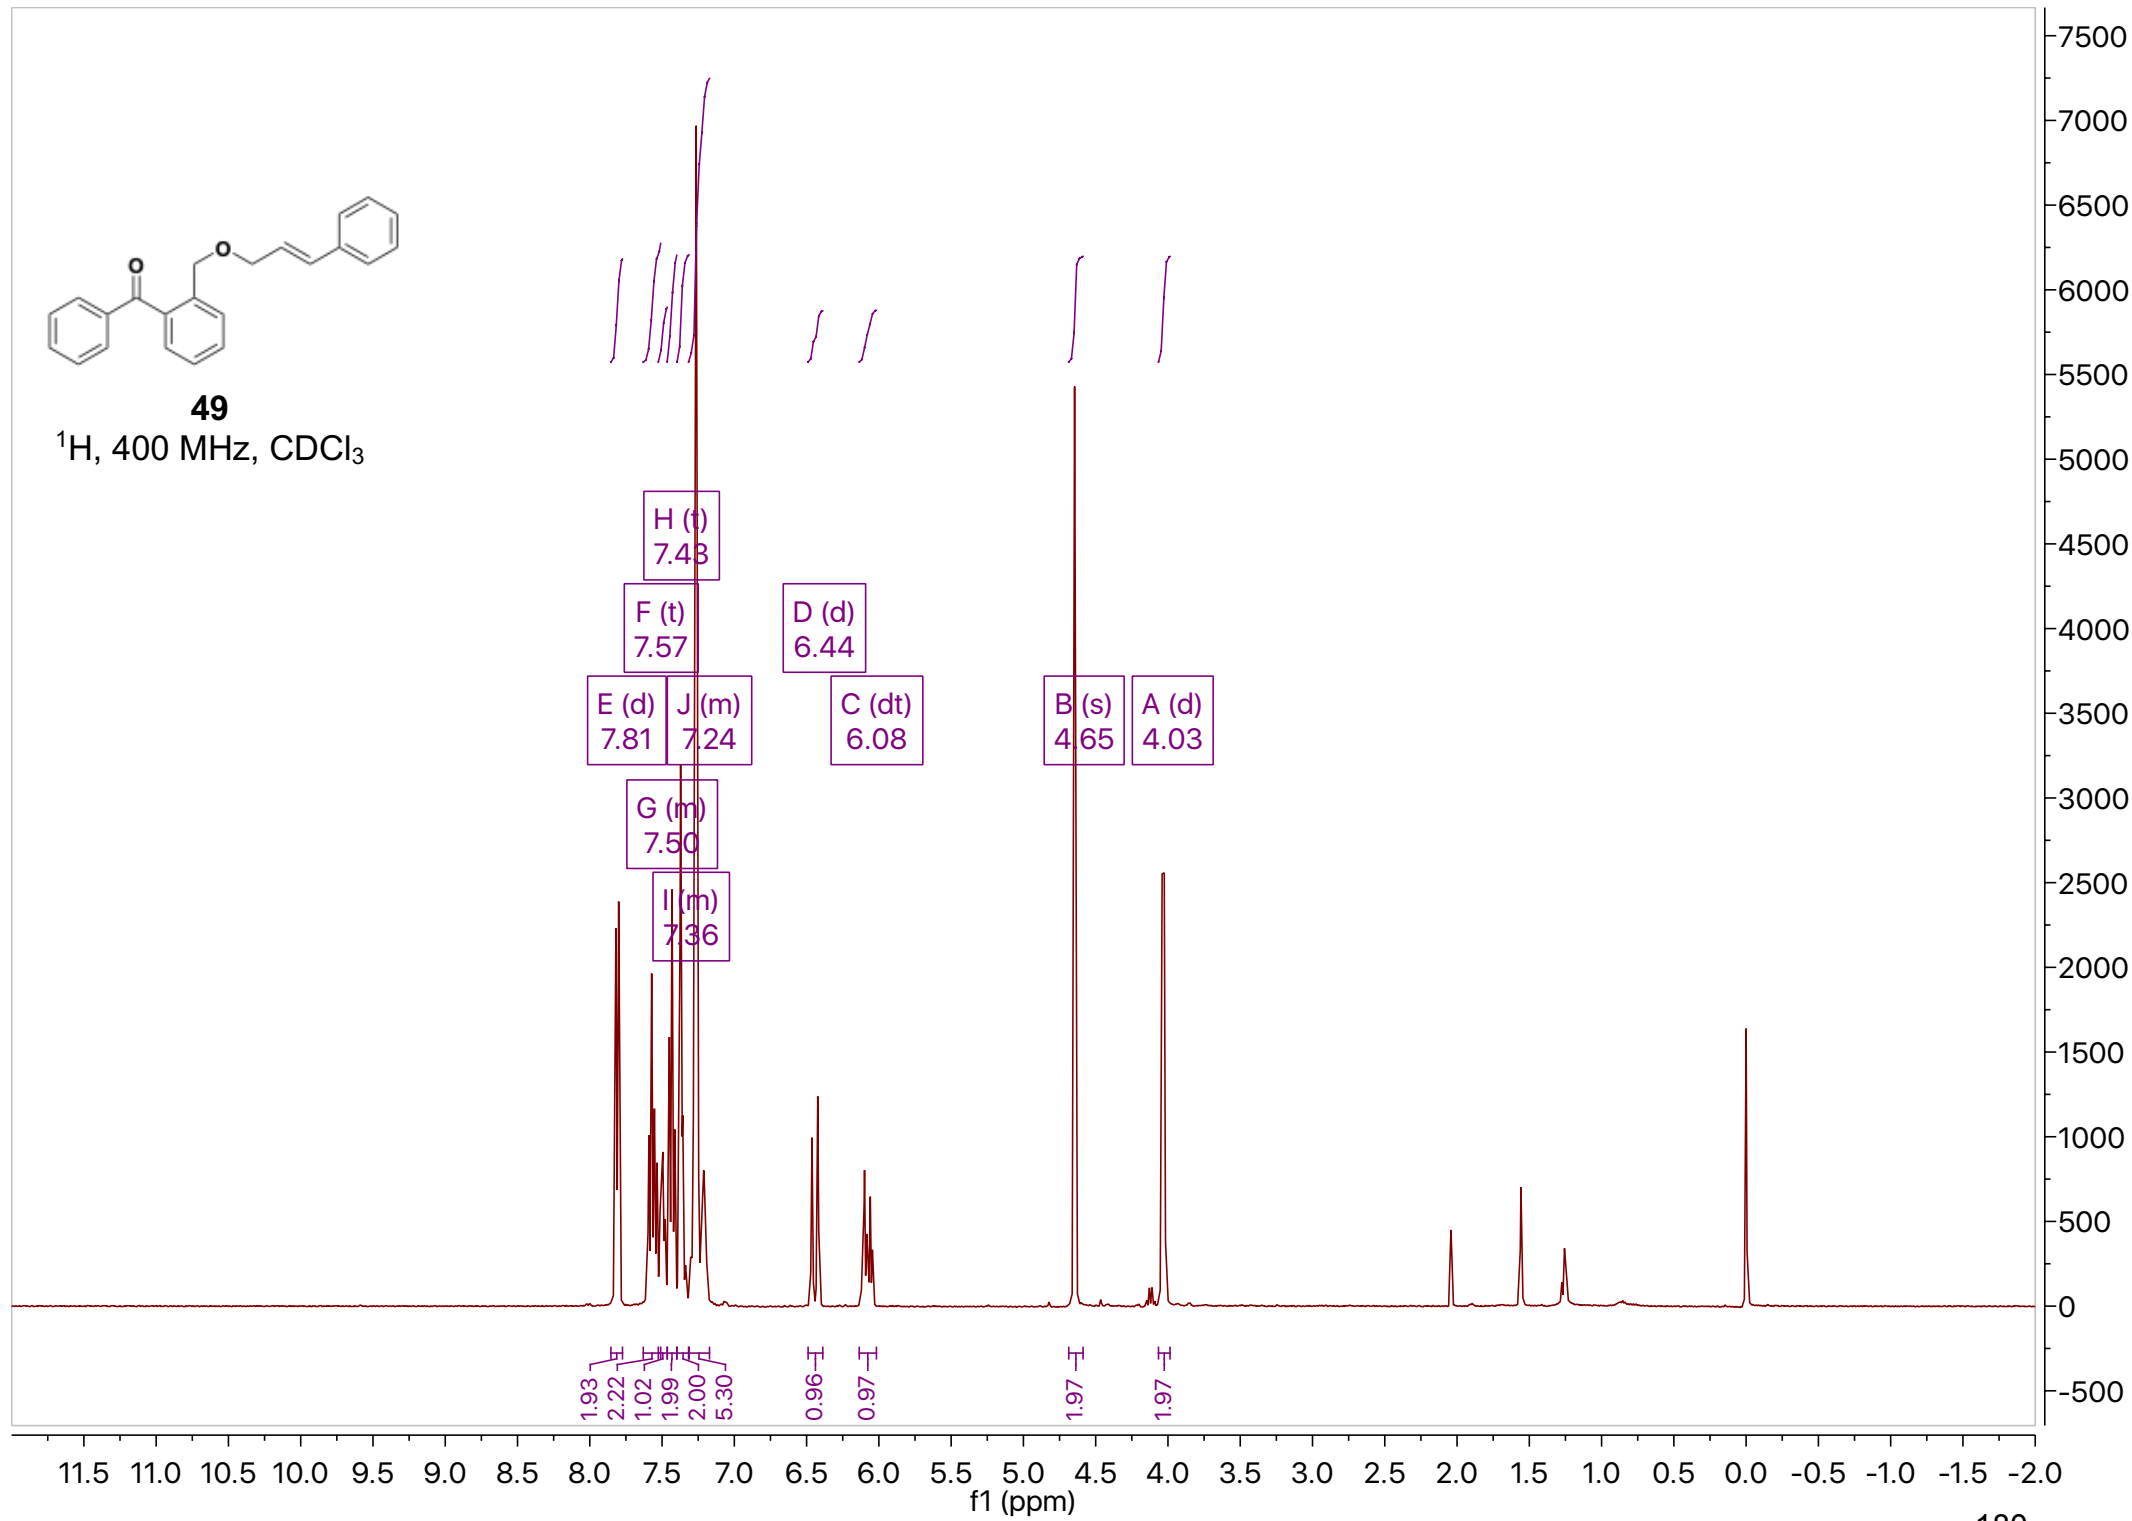

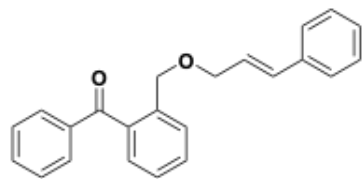

**49**

$^{13}\text{C}$ , 150 MHz,  $\text{CDCl}_3$

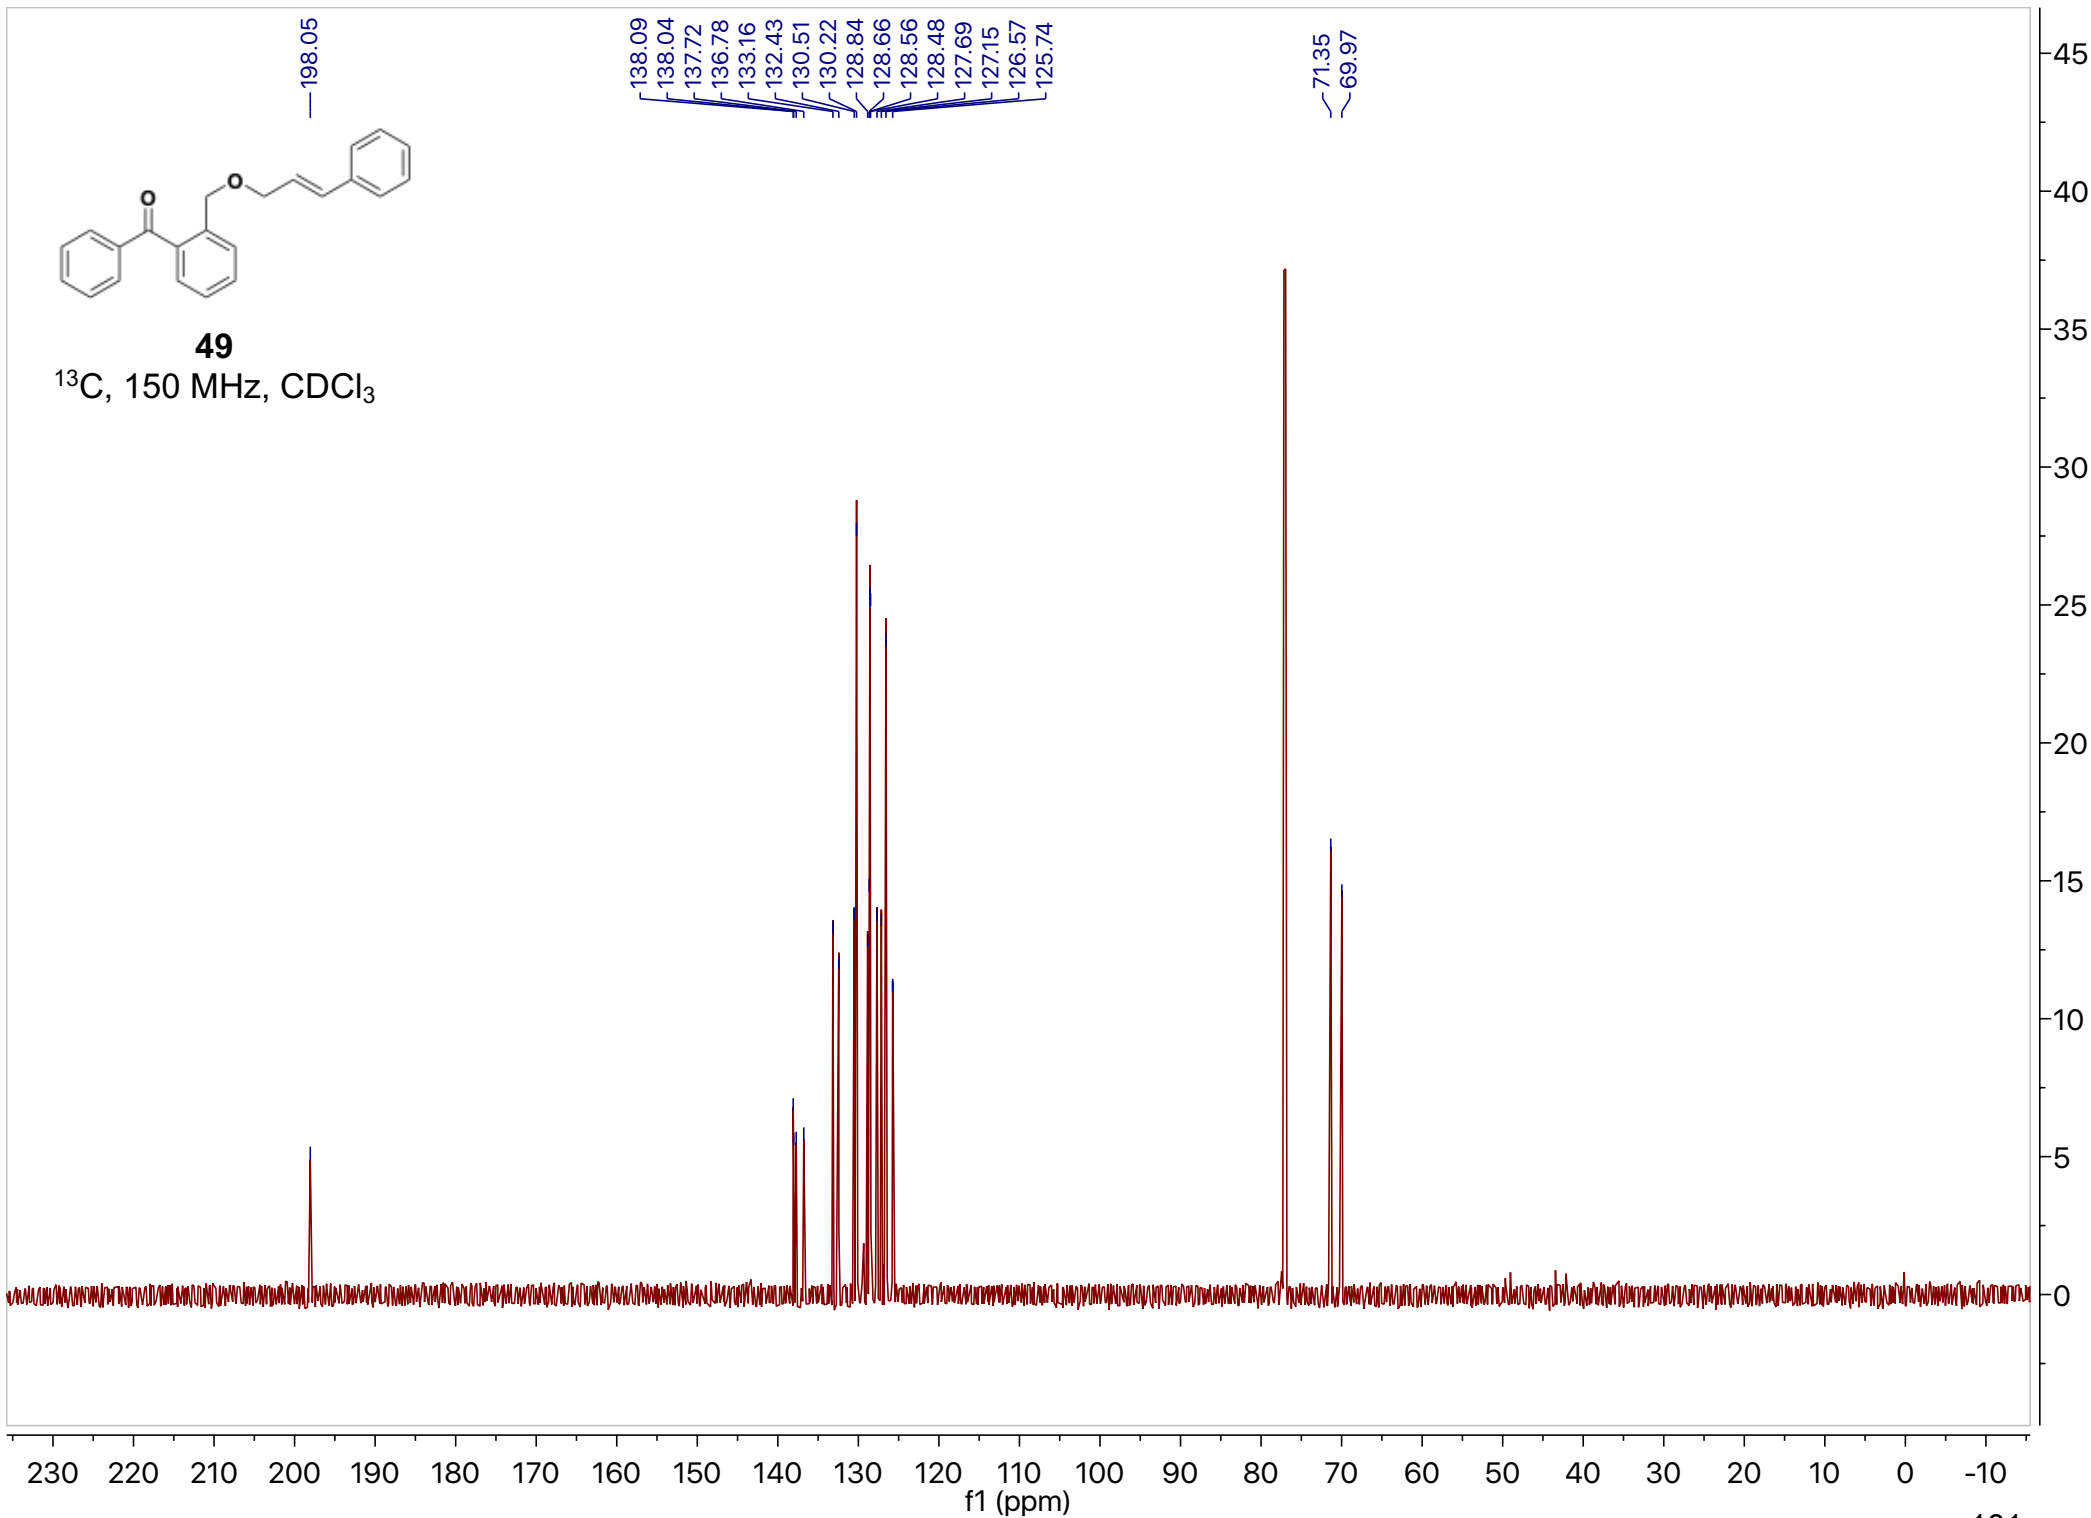

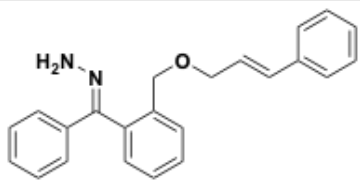

**12b**  
 $^1\text{H}$ , 400 MHz,  $\text{CDCl}_3$

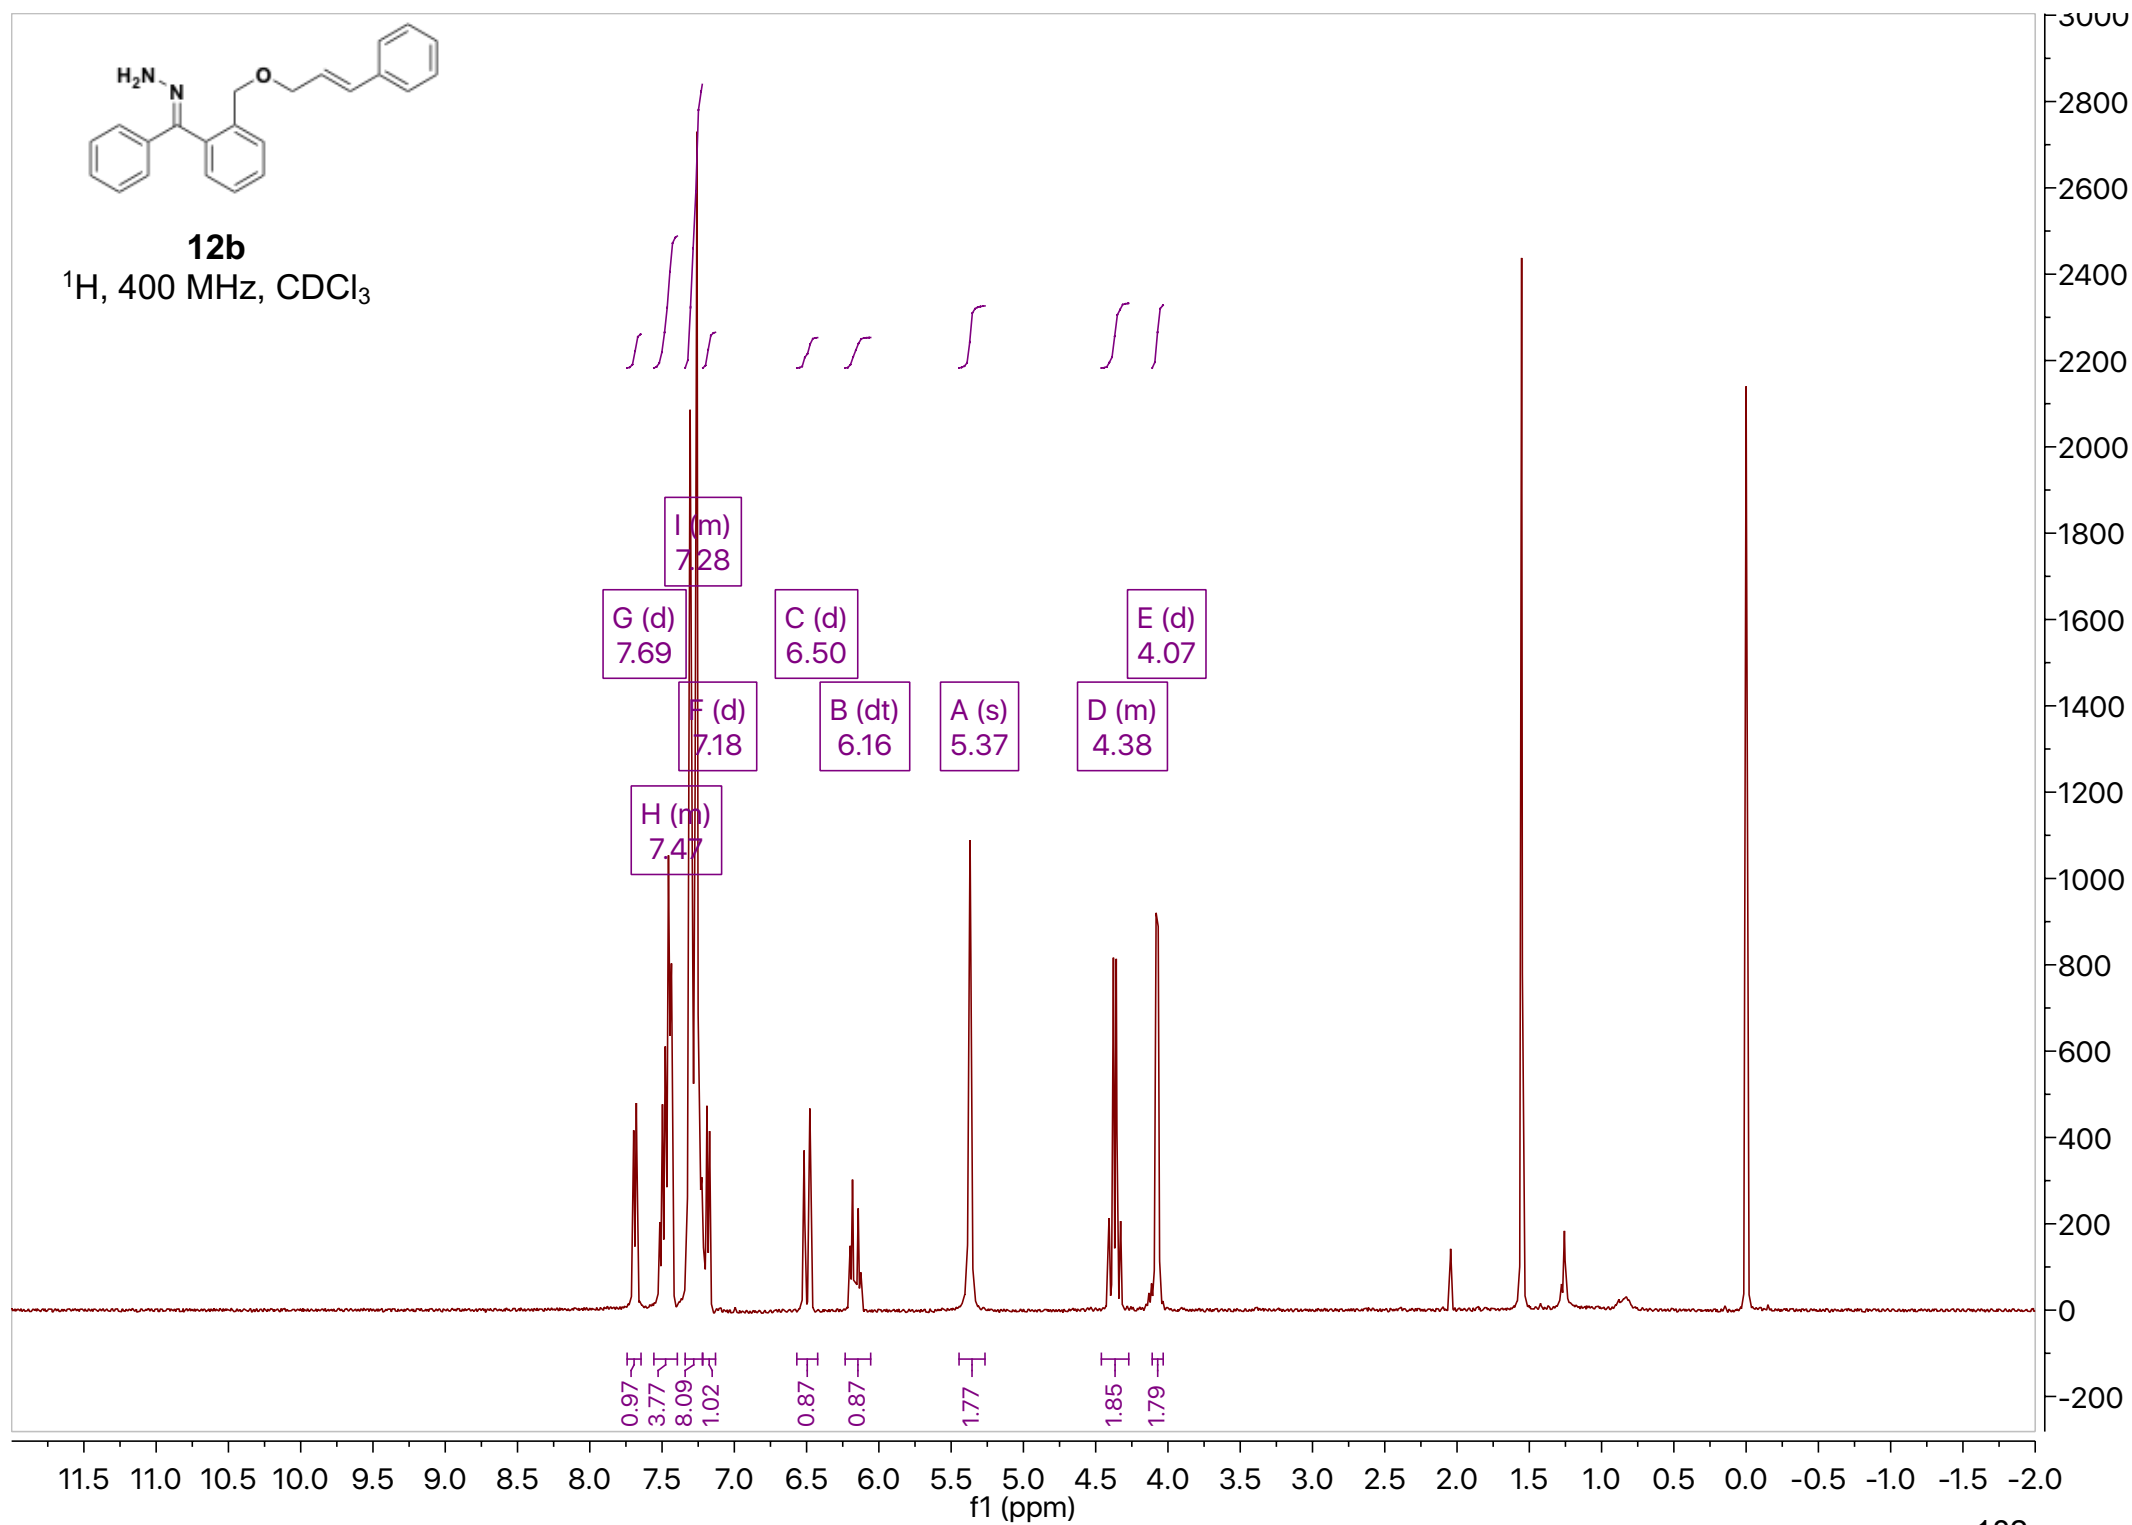

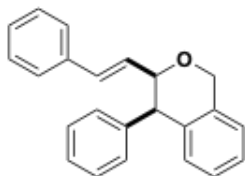

**13b**

$^1\text{H}$ , 400 MHz,  $\text{CDCl}_3$

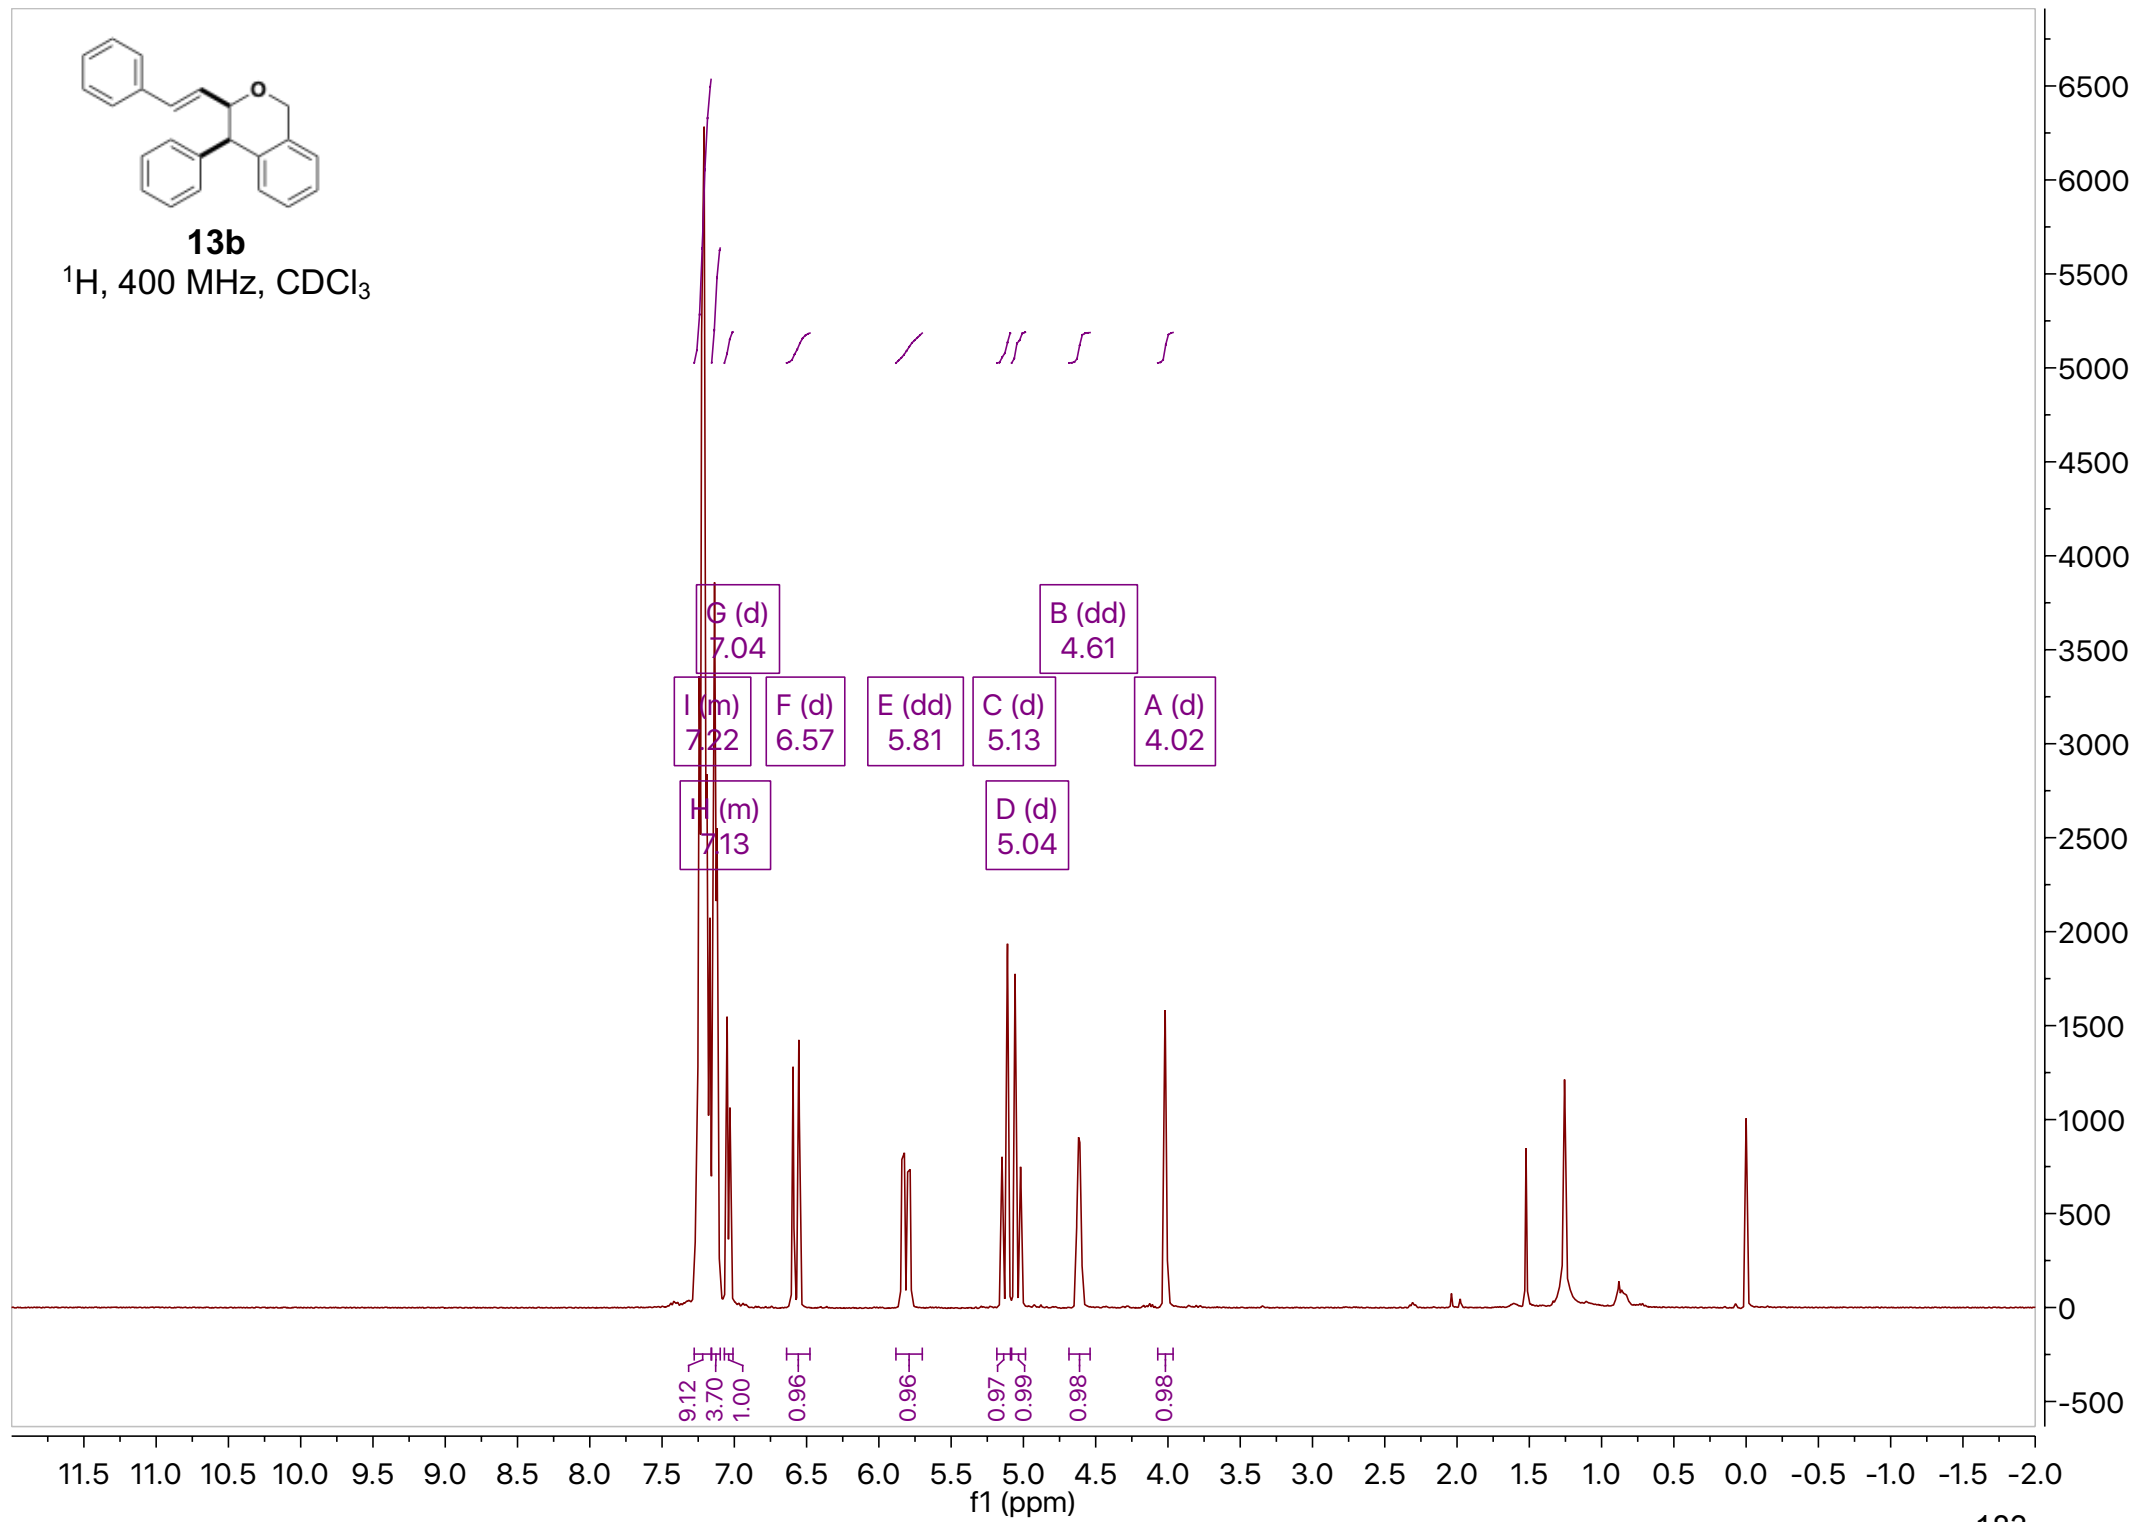

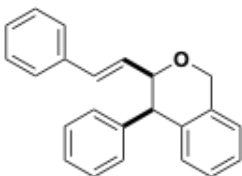

**13b**

$^{13}\text{C}$ , 100 MHz,  $\text{CDCl}_3$

141.59  
136.98  
136.97  
134.18  
131.59  
130.28  
130.12  
128.61  
128.58  
128.01  
127.70  
127.01  
126.71  
126.65  
126.64  
124.19

79.12

68.61

49.18

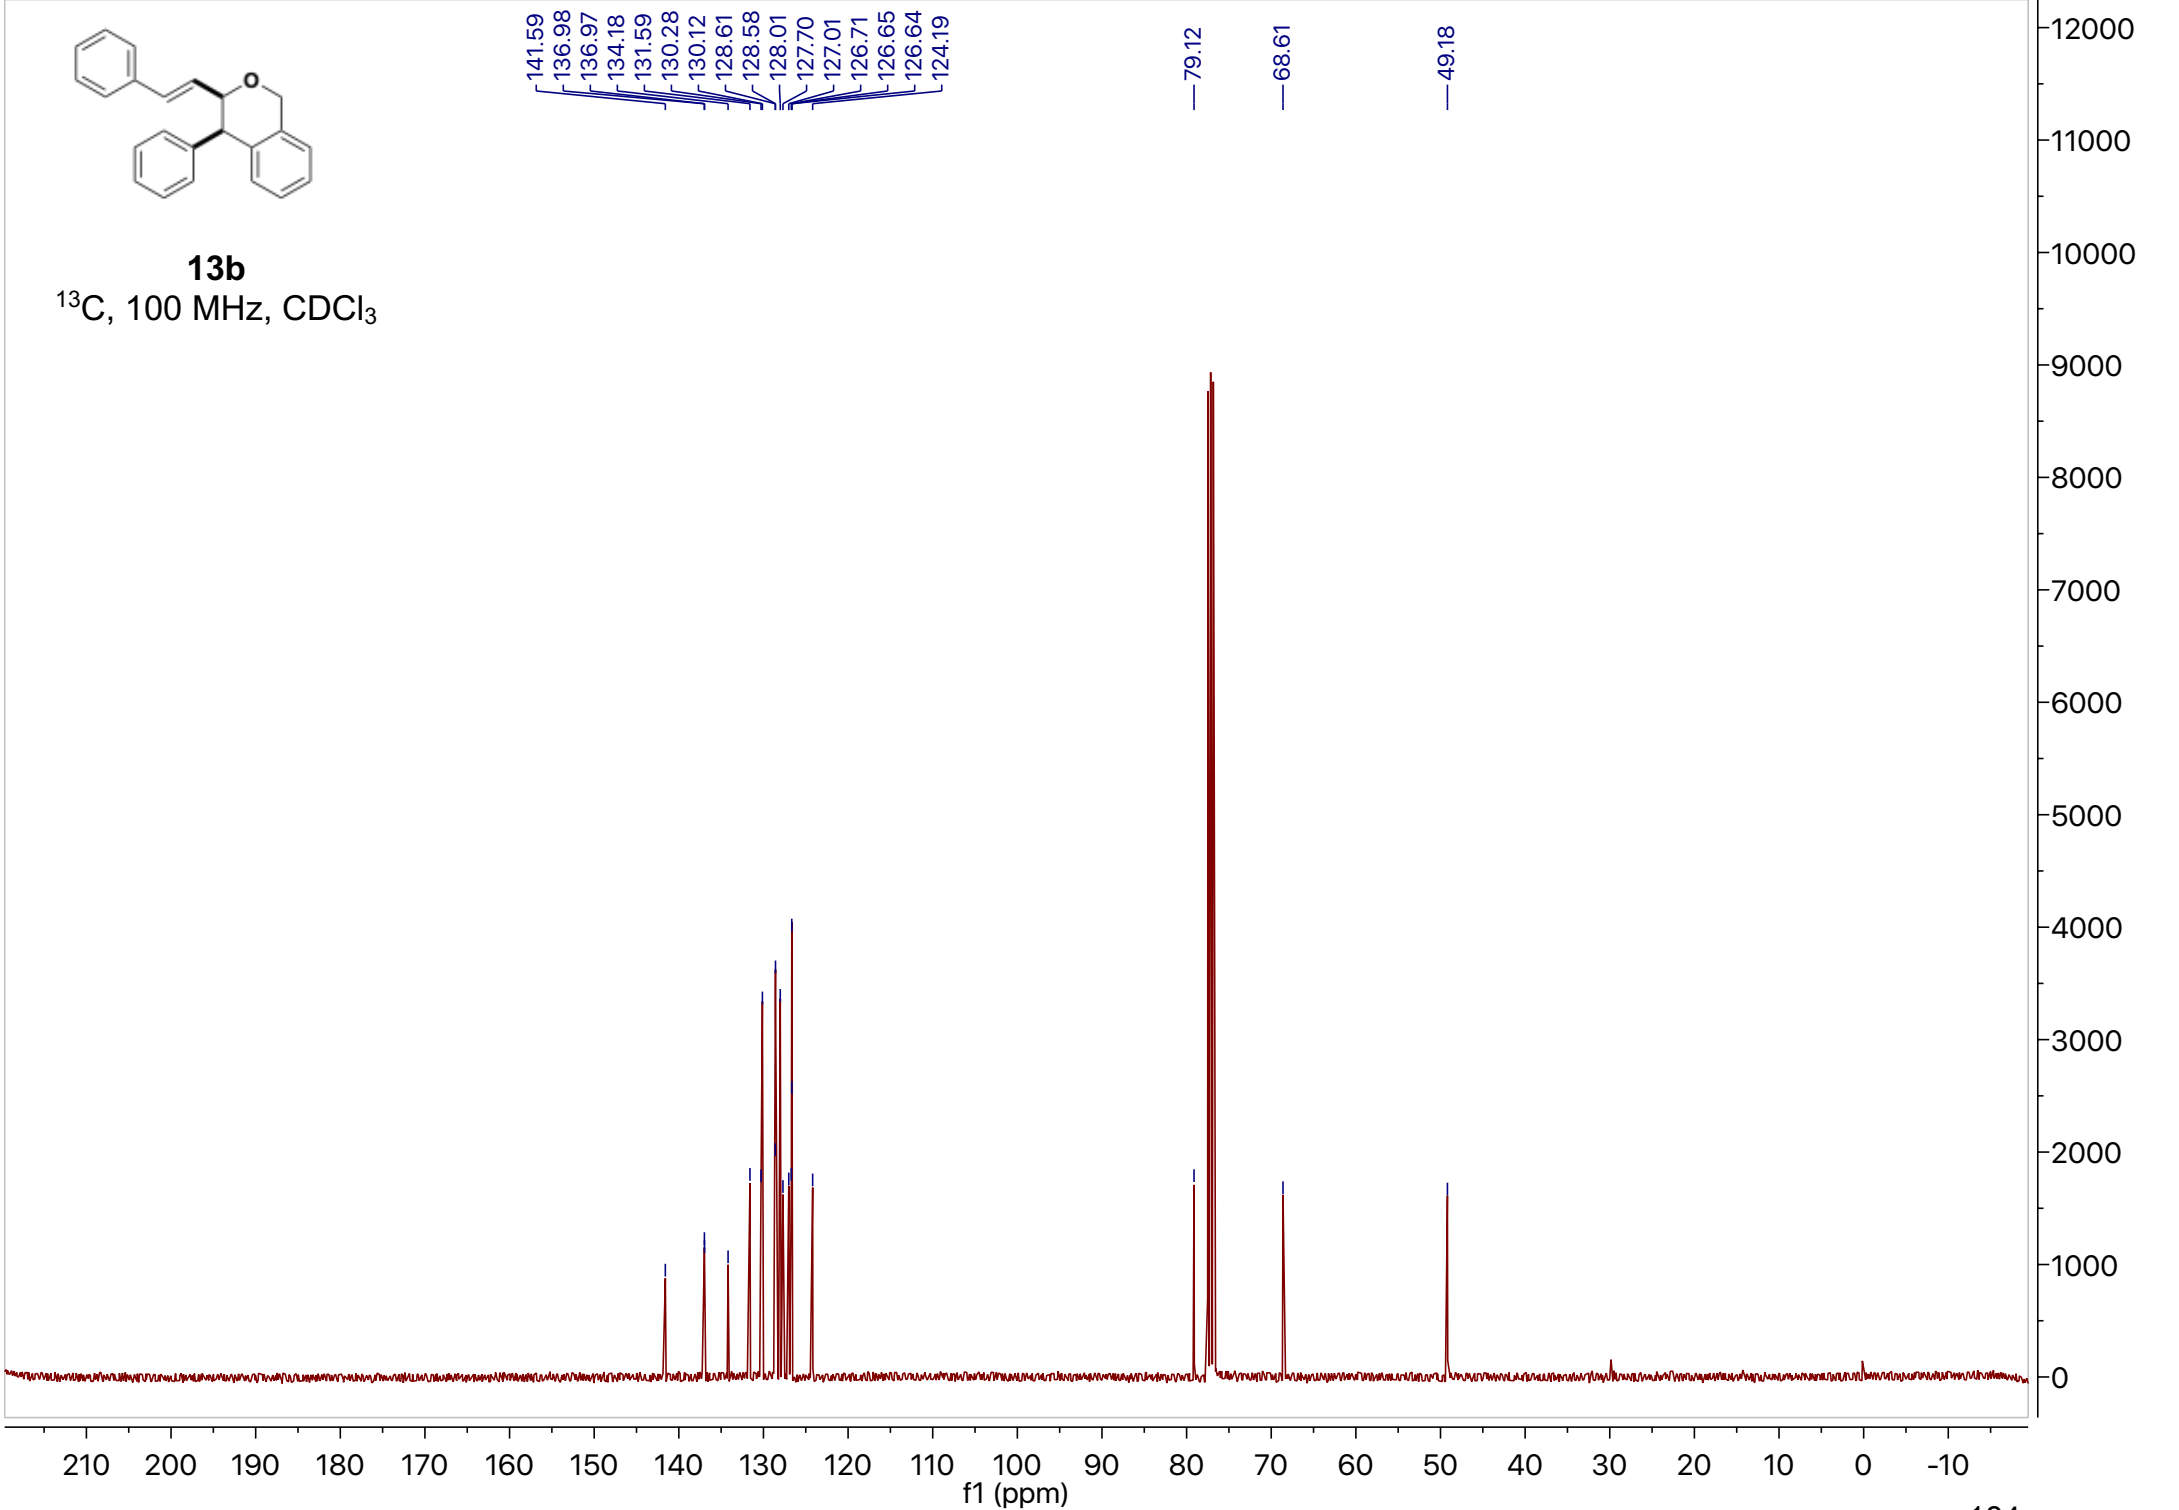

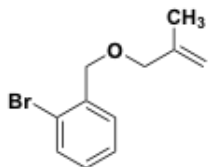

**50**

$^1\text{H}$ , 600 MHz,  $\text{CDCl}_3$

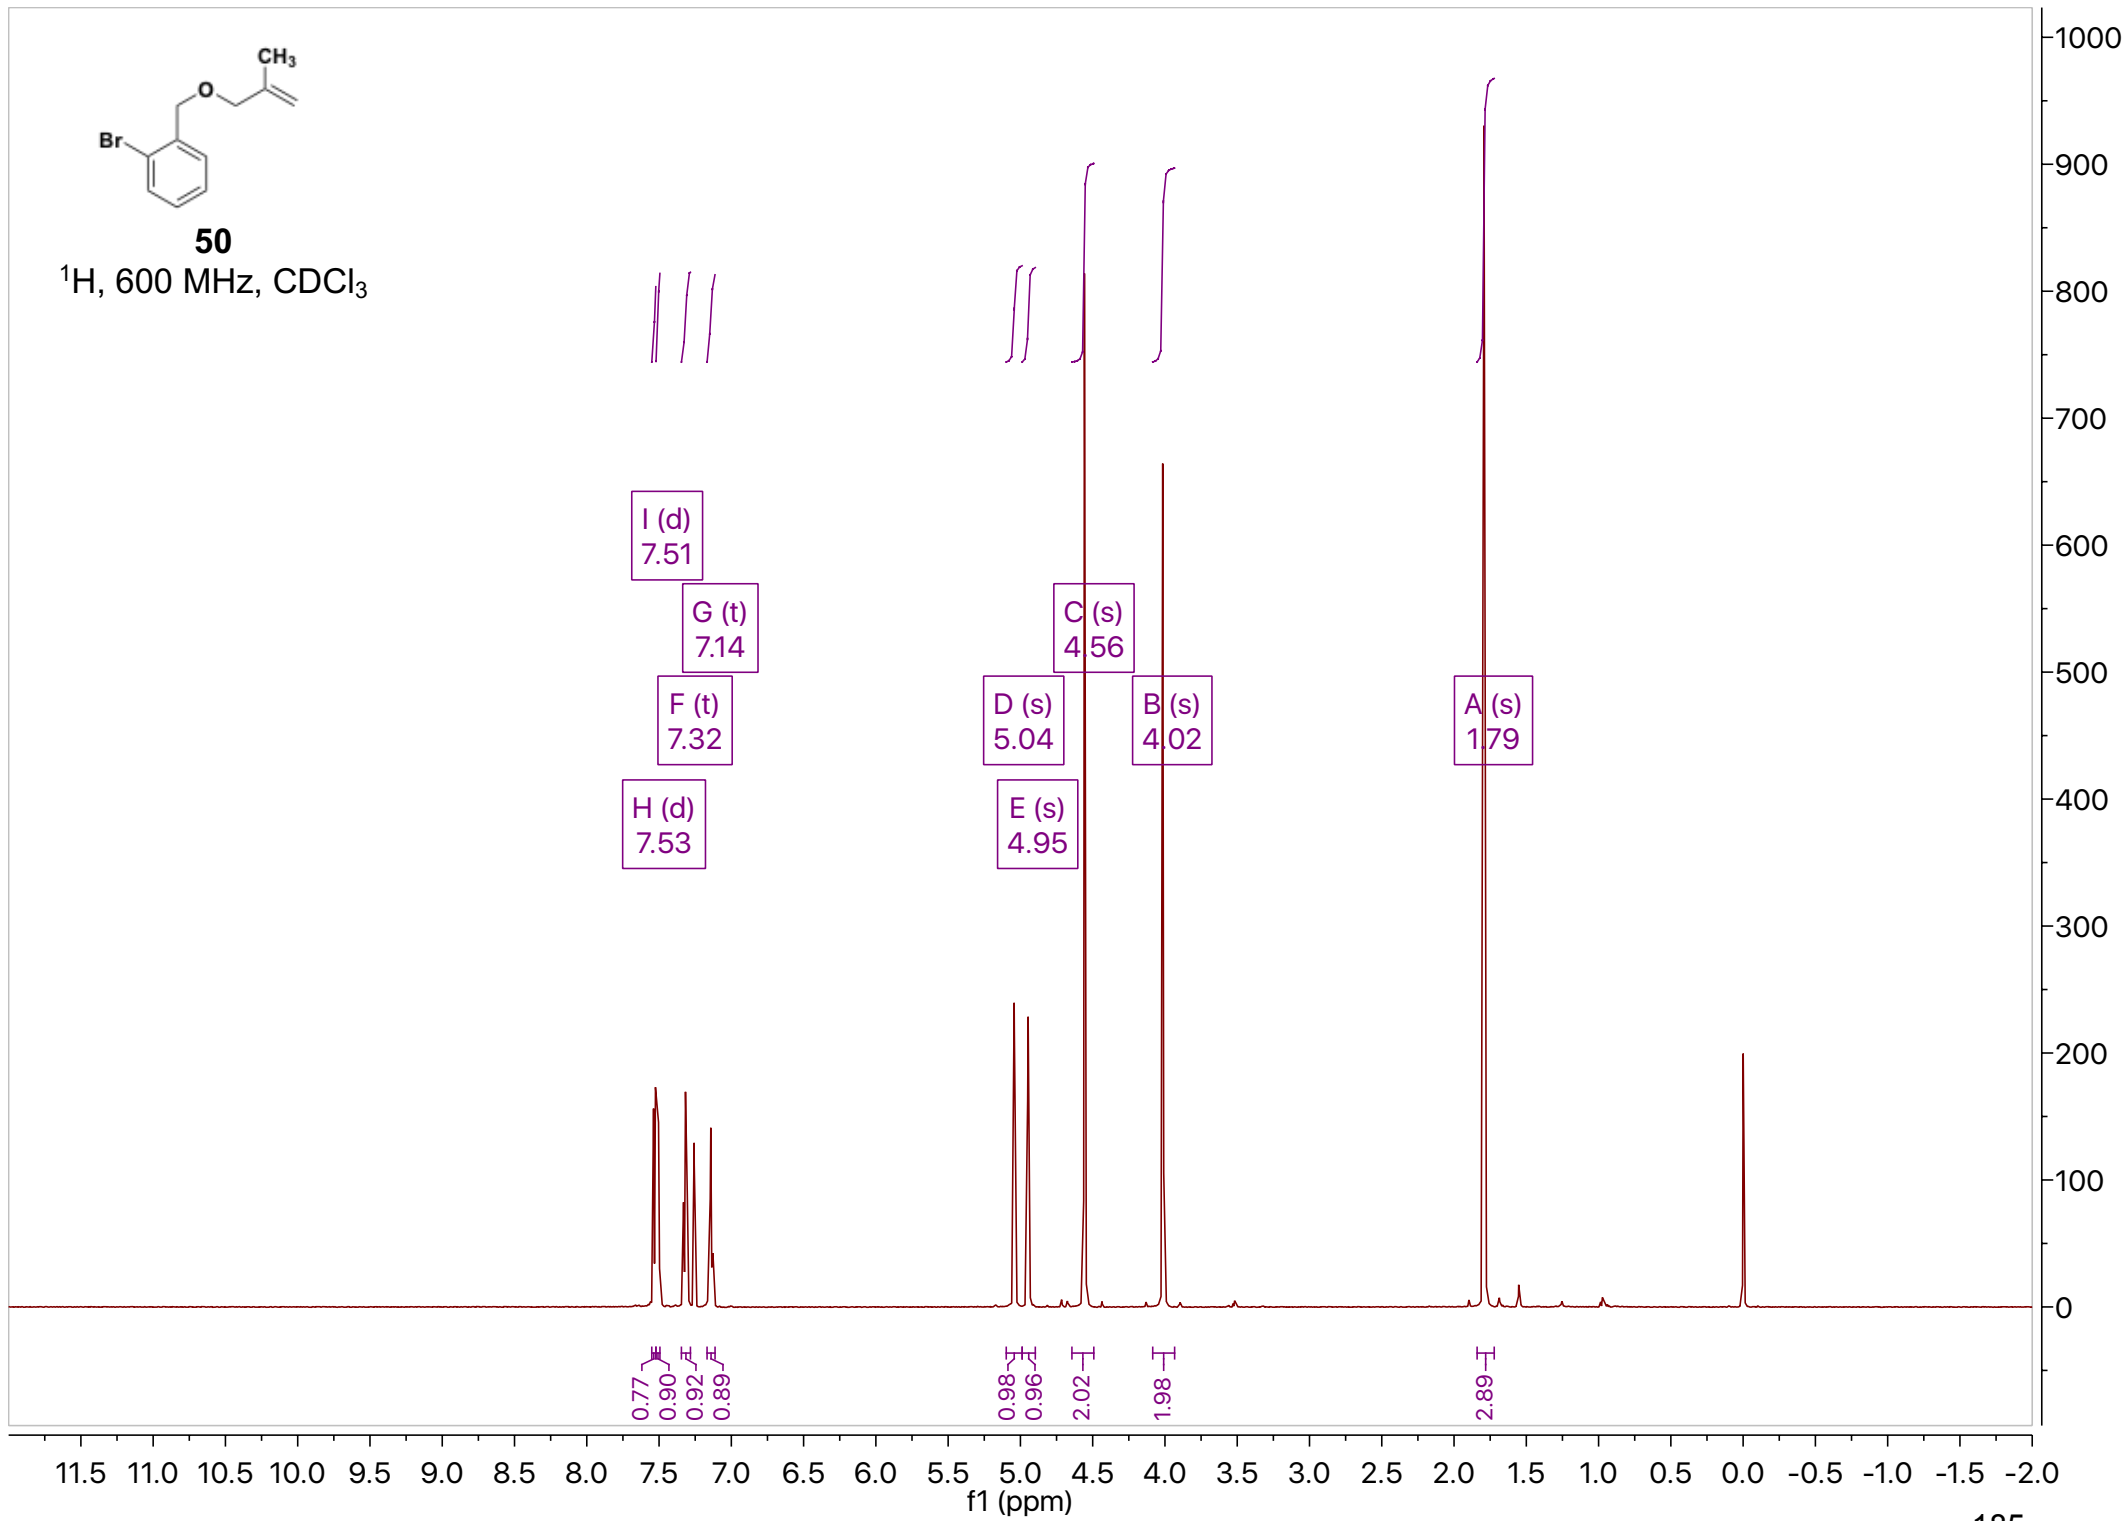

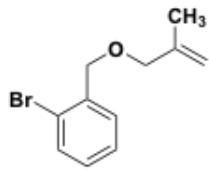

**50**

$^{13}\text{C}$ , 150 MHz,  $\text{CDCl}_3$

142.16  
137.95  
132.58  
129.06  
128.93  
127.51  
122.71

112.60

74.82  
71.34

19.72

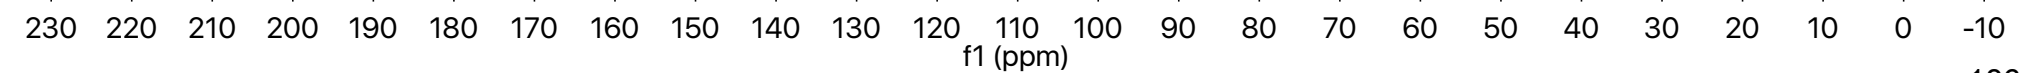



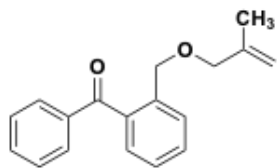

**51**

$^1\text{H}$ , 600 MHz,  $\text{CDCl}_3$

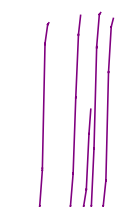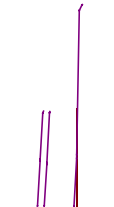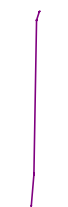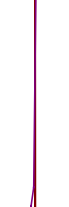

D (t)  
7.45

B (m)  
7.58

A (d)  
7.80

C (t)  
7.49

E (m)  
7.36

I (s)  
4.84

F (s)  
4.59

G (s)  
3.79

J (s)  
4.80

H (s)  
1.61

1.94  
2.02  
1.02  
2.05  
1.98

1.00  
1.00  
2.13

2.06

3.00

11.5 11.0 10.5 10.0 9.5 9.0 8.5 8.0 7.5 7.0 6.5 6.0 5.5 5.0 4.5 4.0 3.5 3.0 2.5 2.0 1.5 1.0 0.5 0.0 -0.5 -1.0 -1.5 -2.0  
f1 (ppm)

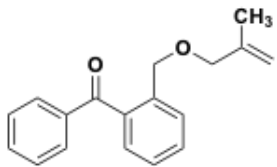

**51**

$^{13}\text{C}$ , 150 MHz,  $\text{CDCl}_3$

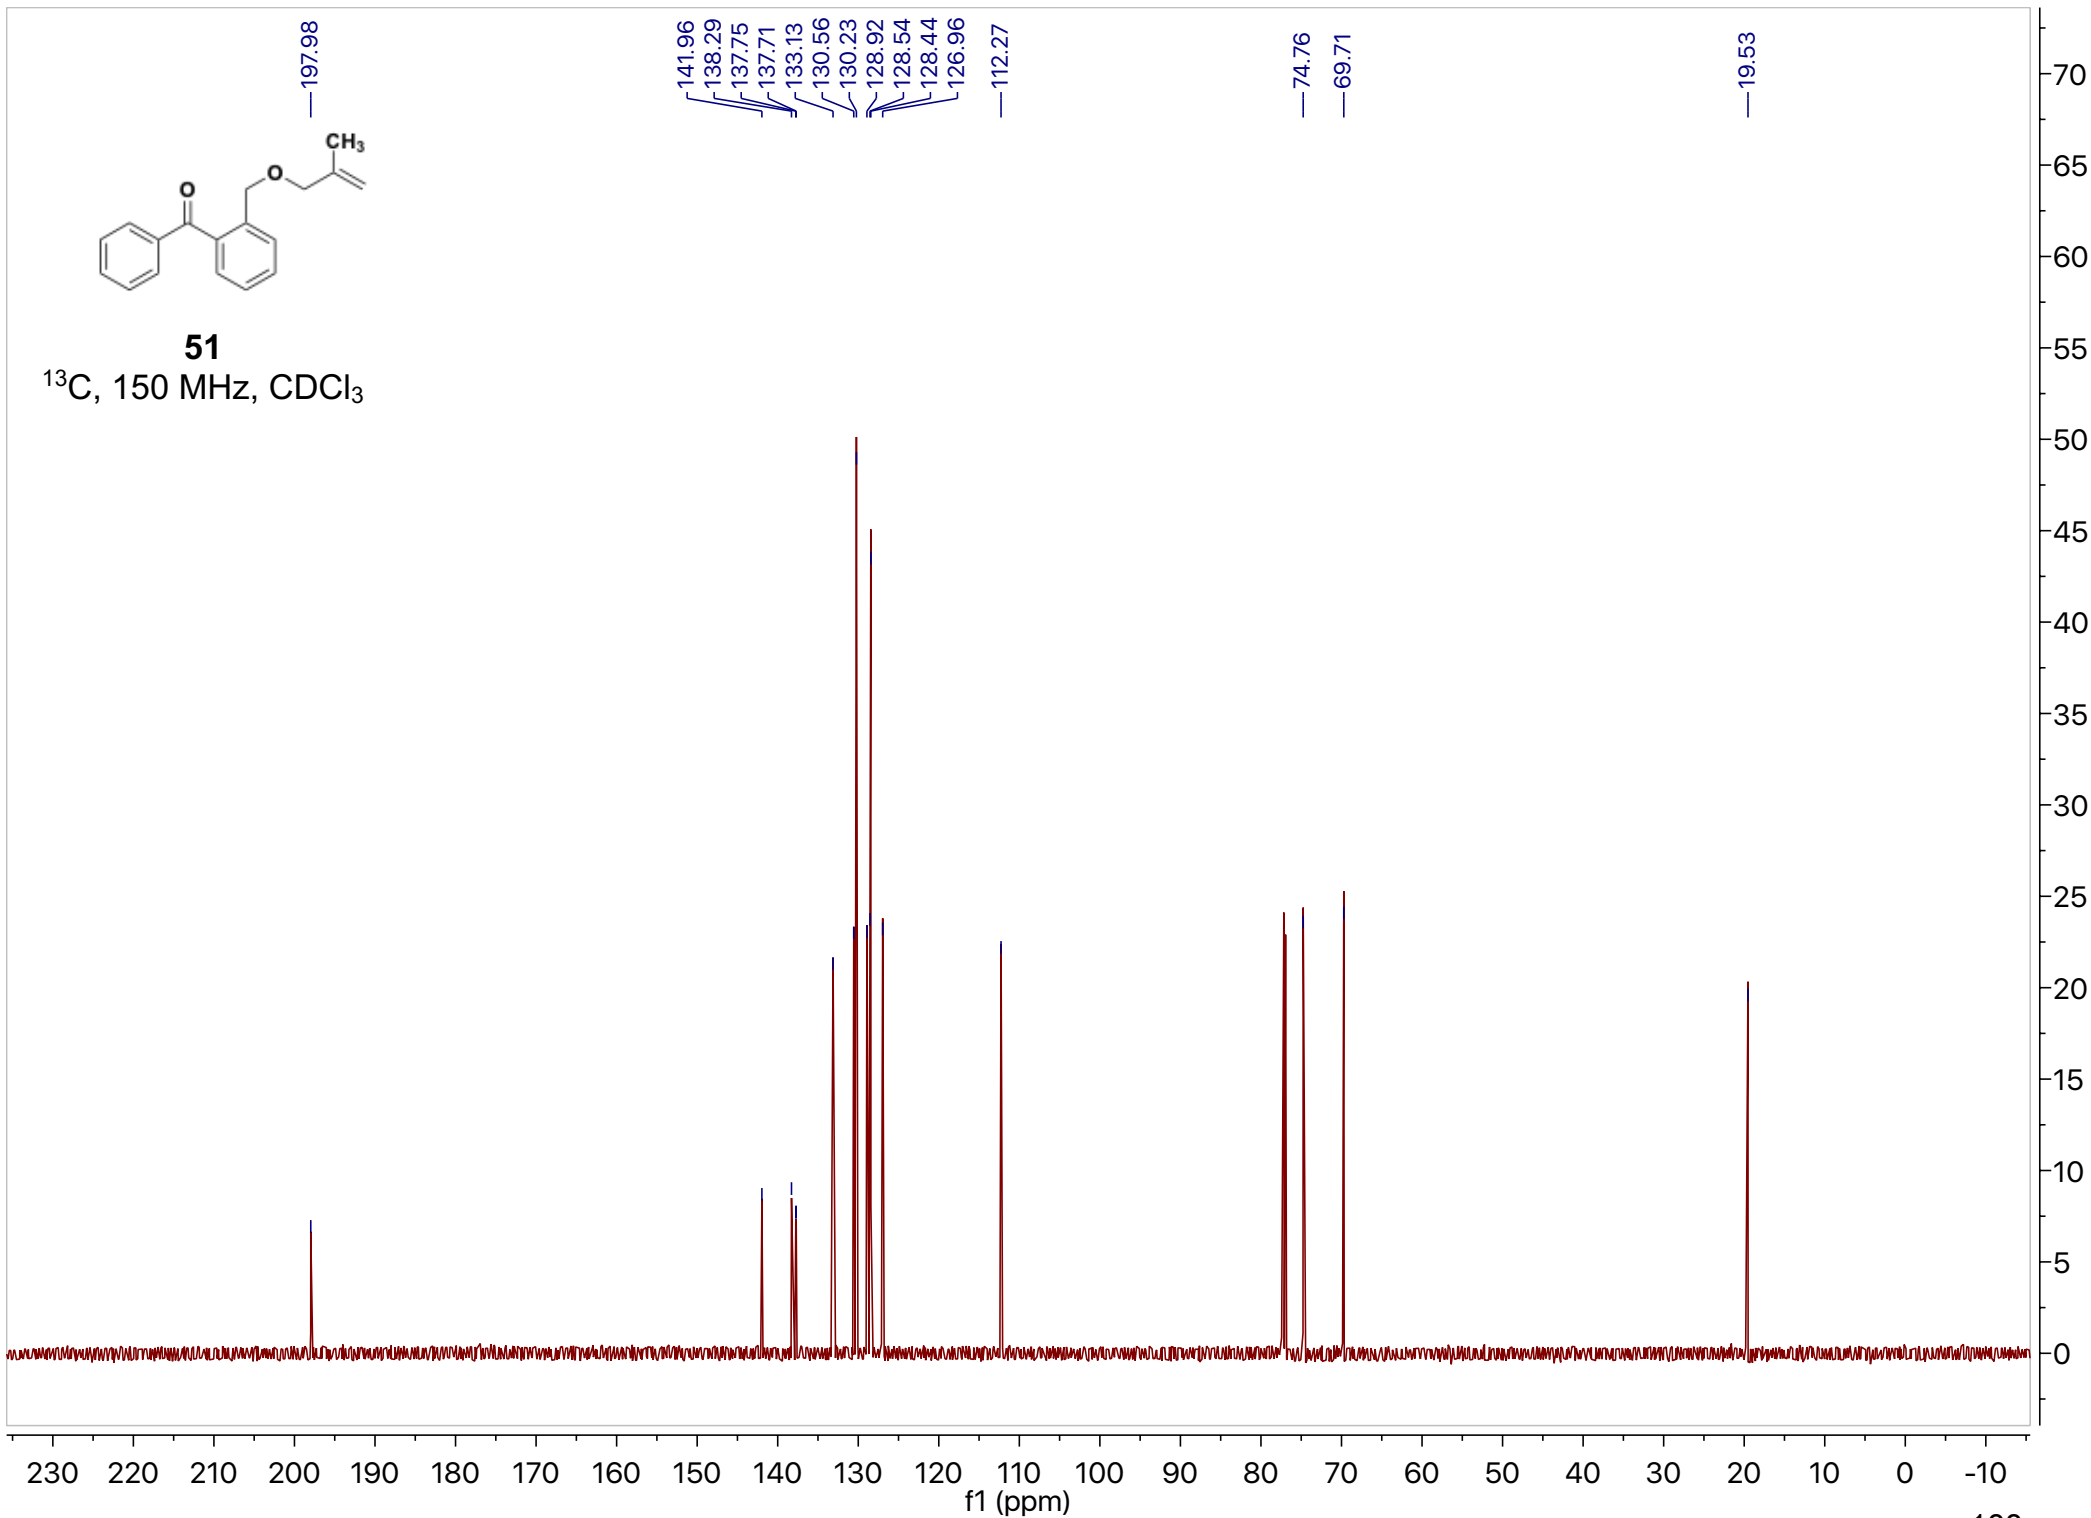

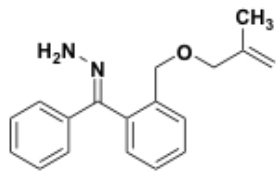

**12c**

$^1\text{H}$ , 400 MHz,  $\text{CDCl}_3$

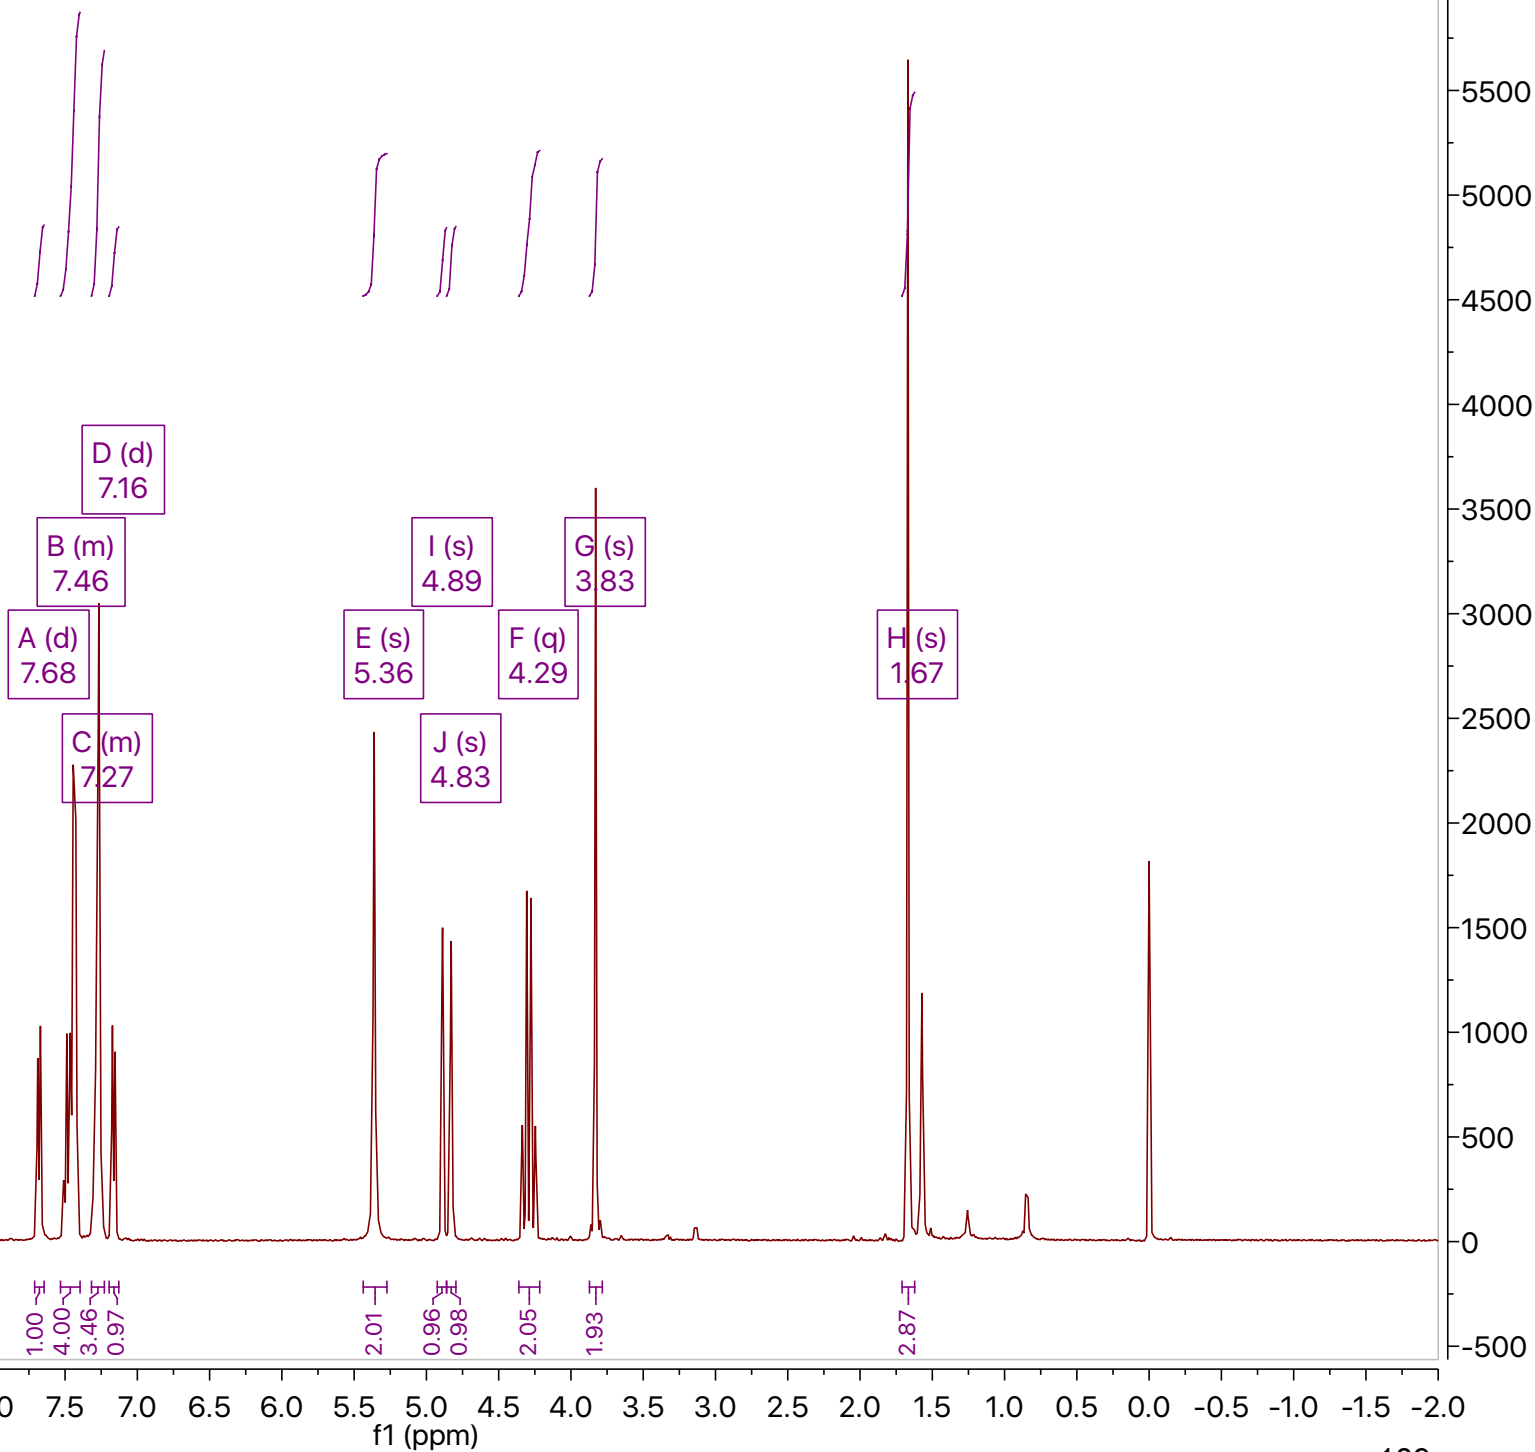

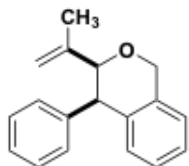

**13c**

$^1\text{H}$ , 400 MHz,  $\text{CDCl}_3$

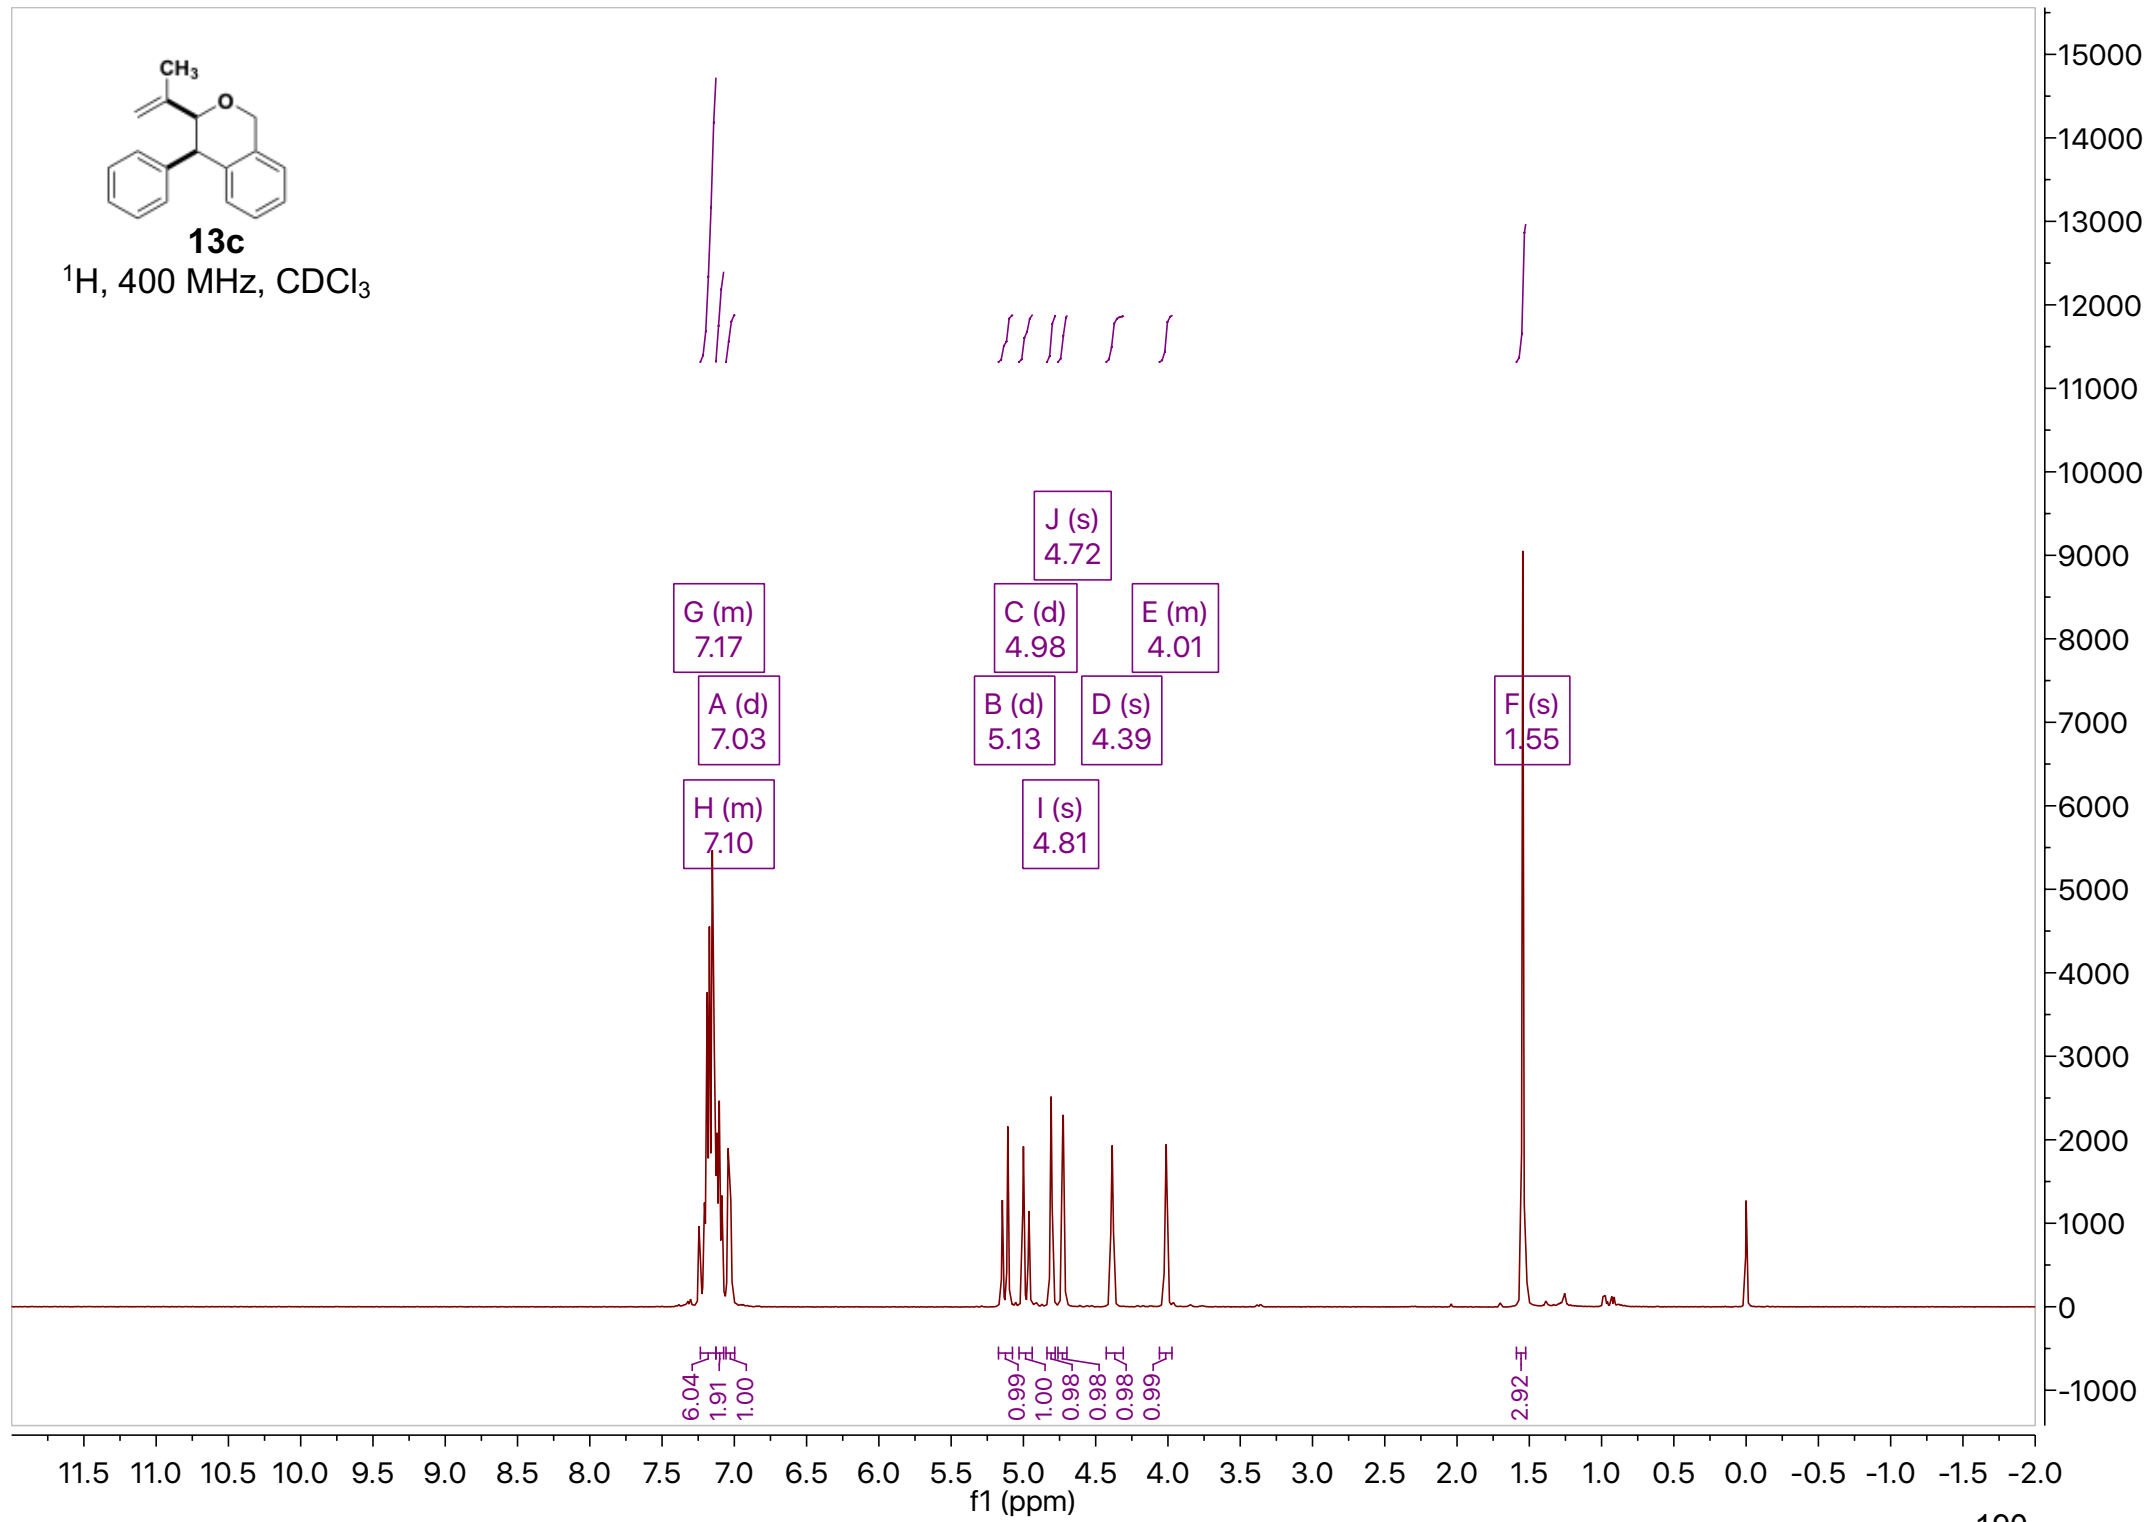

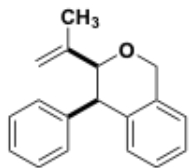

**13c**

$^{13}\text{C}$ , 100 MHz,  $\text{CDCl}_3$

143.25  
141.86  
137.43  
134.08  
130.41  
129.80  
127.79  
126.90  
126.57  
126.45  
124.16

111.43

80.80

68.90

47.52

19.72

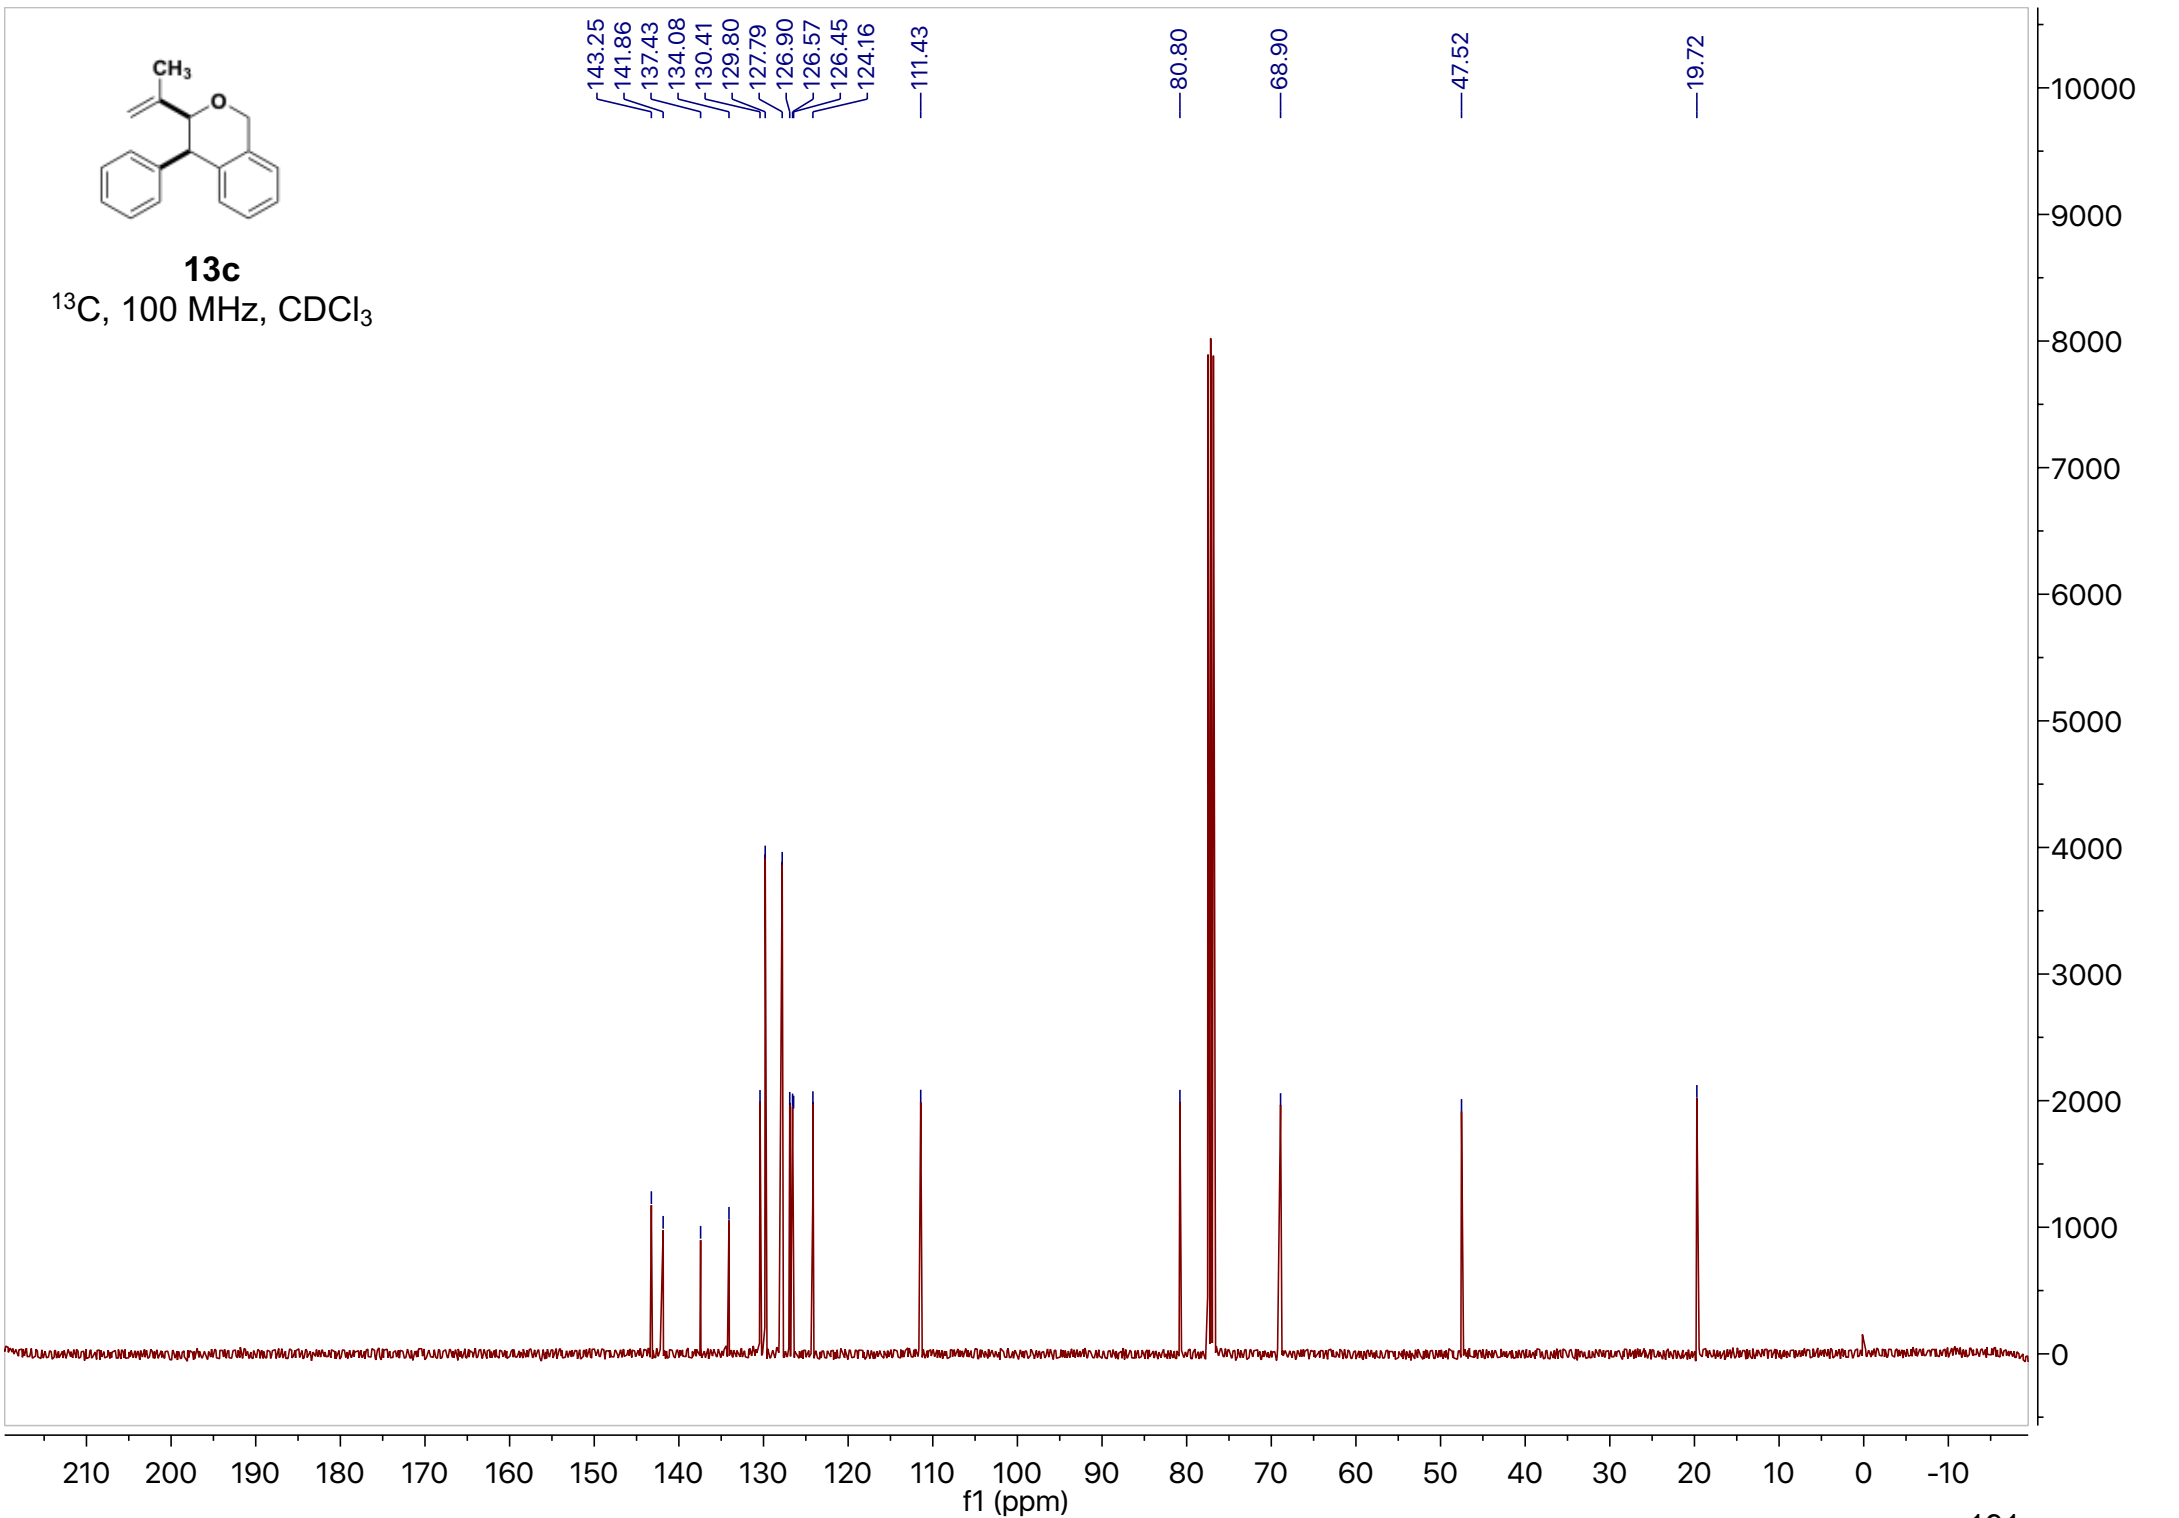

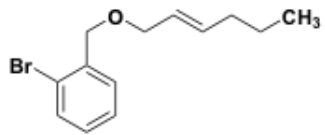

**52**

$^1\text{H}$ , 600 MHz,  $\text{CDCl}_3$

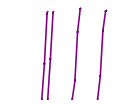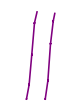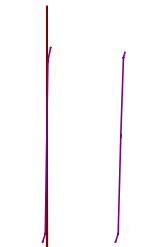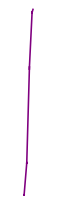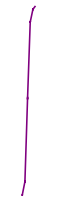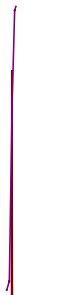

D (t)  
7.14

B (d)  
7.49

A (d)  
7.53

C (t)  
7.31

F (m)  
5.63

E (dt)  
5.75

G (s)  
4.56

H (d)  
4.05

I (q)  
2.05

J (h)  
1.43

K (t)  
0.92

0.97  
0.97  
1.01  
0.98

0.97  
0.95

2.16

2.11

2.06

2.09

3.15

11.5 11.0 10.5 10.0 9.5 9.0 8.5 8.0 7.5 7.0 6.5 6.0 5.5 5.0 4.5 4.0 3.5 3.0 2.5 2.0 1.5 1.0 0.5 0.0 -0.5 -1.0 -1.5 -2.0

f1 (ppm)

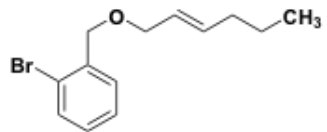

**52**

$^{13}\text{C}$ , 150 MHz,  $\text{CDCl}_3$

138.02  
135.23  
132.58  
129.20  
128.91  
127.49  
126.25  
122.82

71.68  
71.19

34.56

22.37

13.87

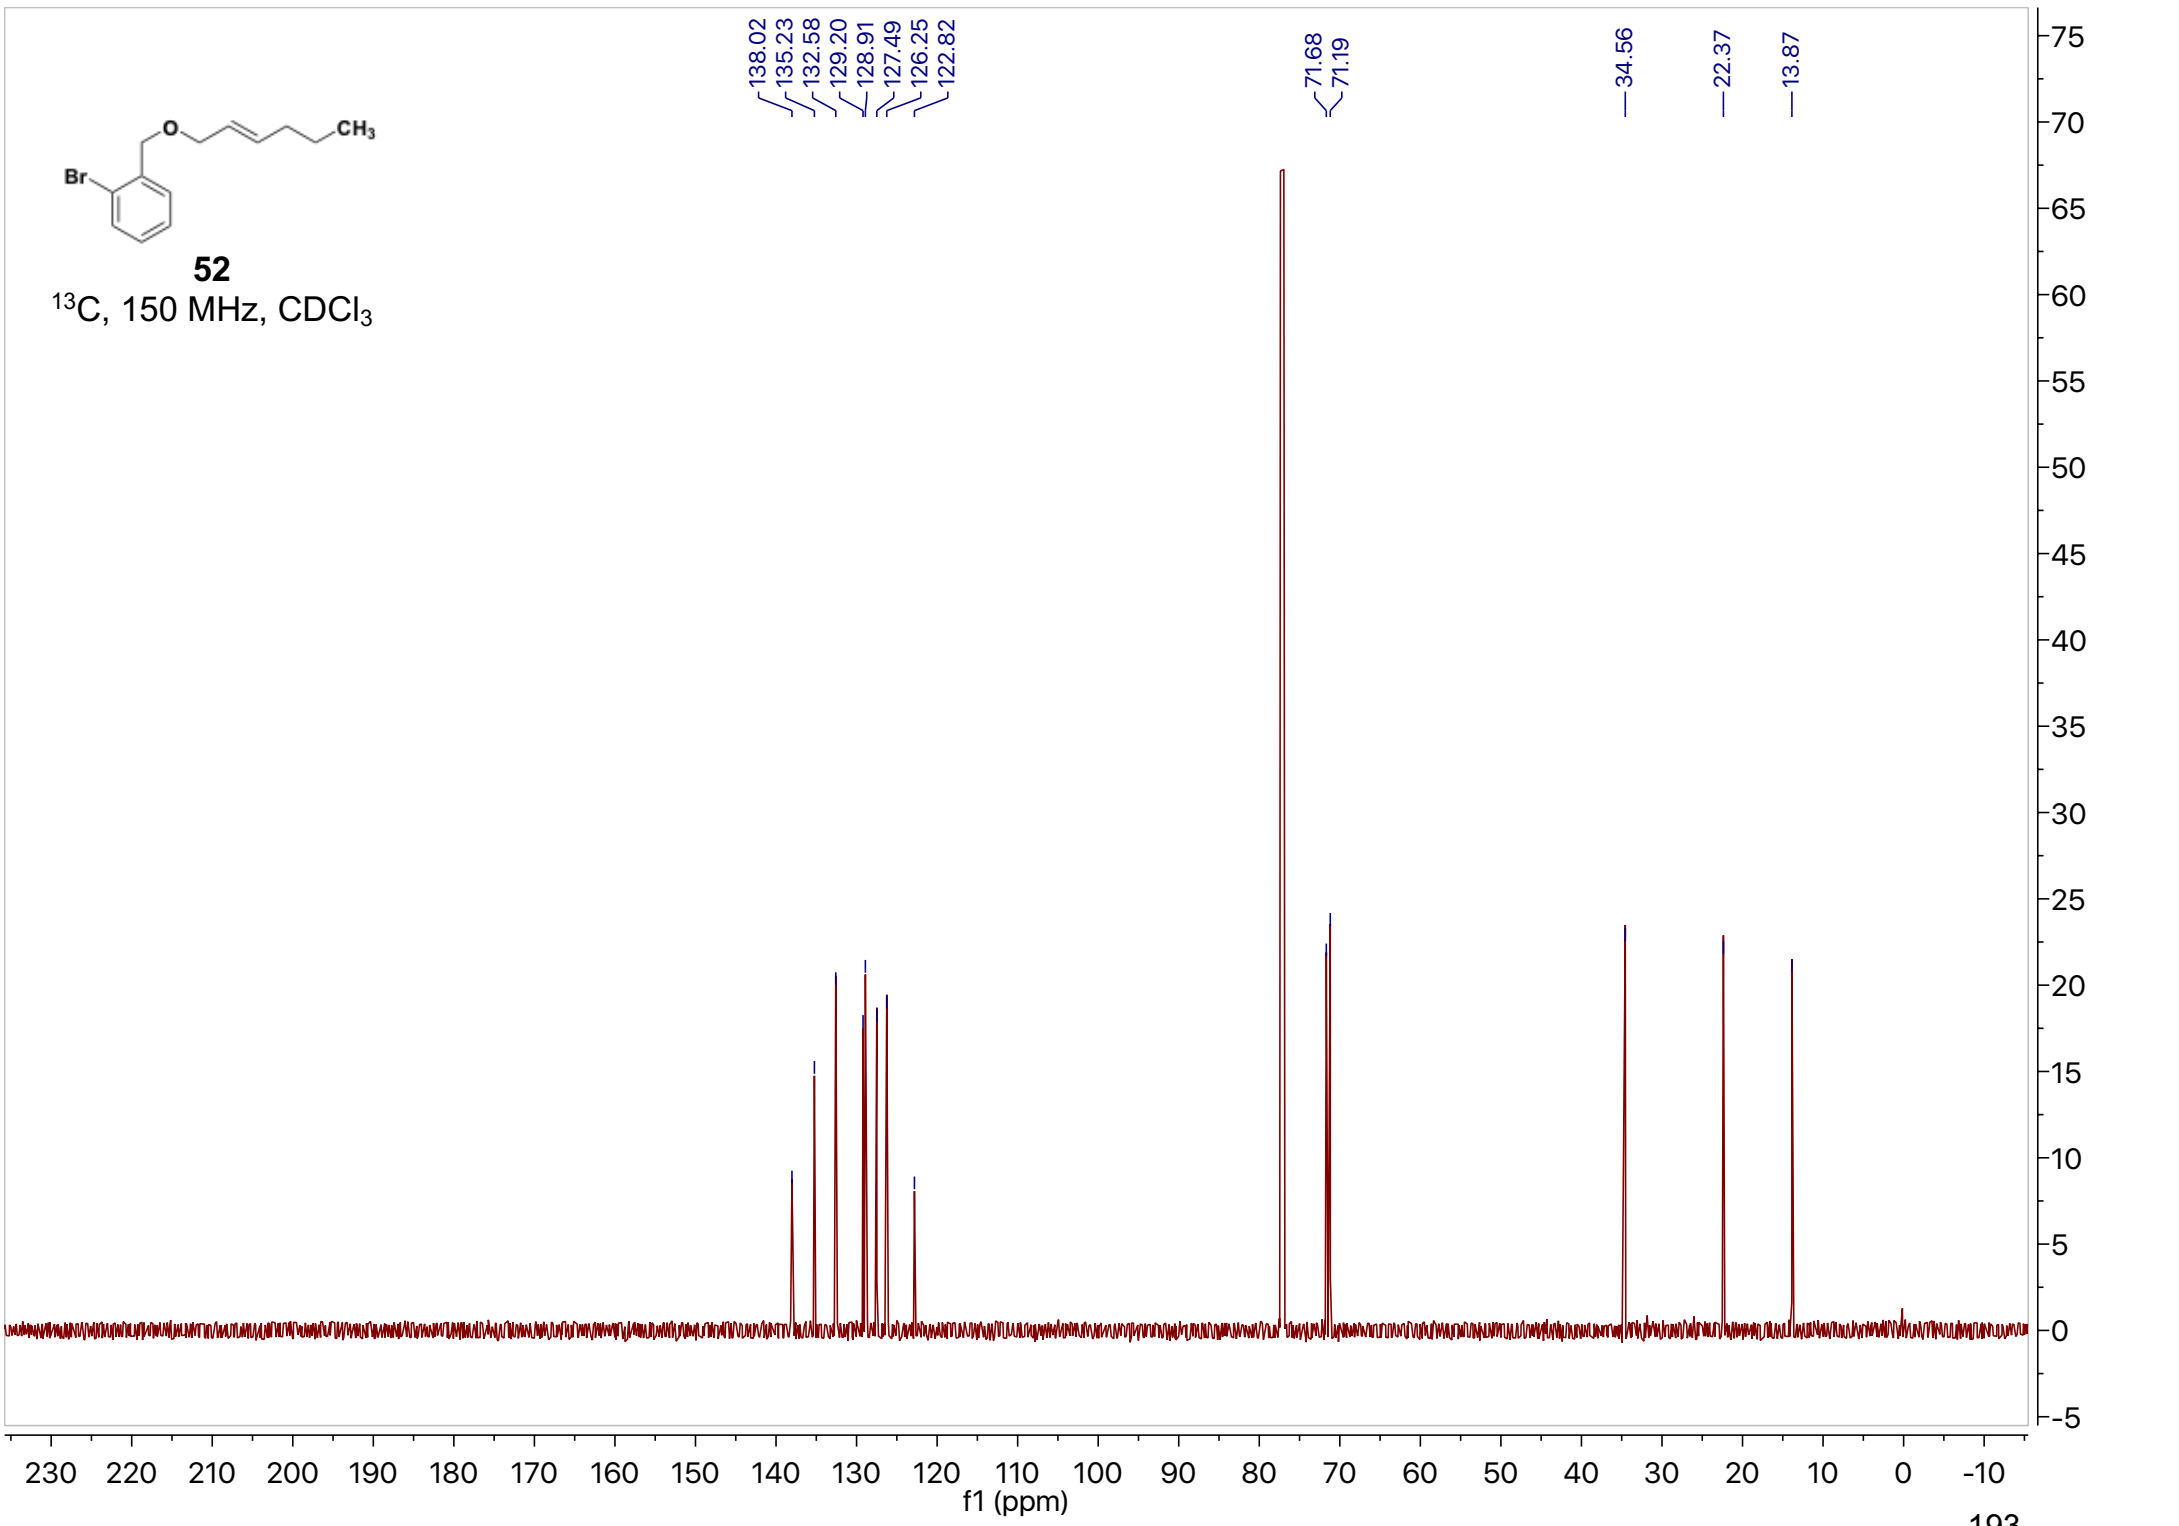

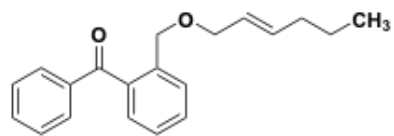

**53**

$^1\text{H}$ , 600 MHz,  $\text{CDCl}_3$

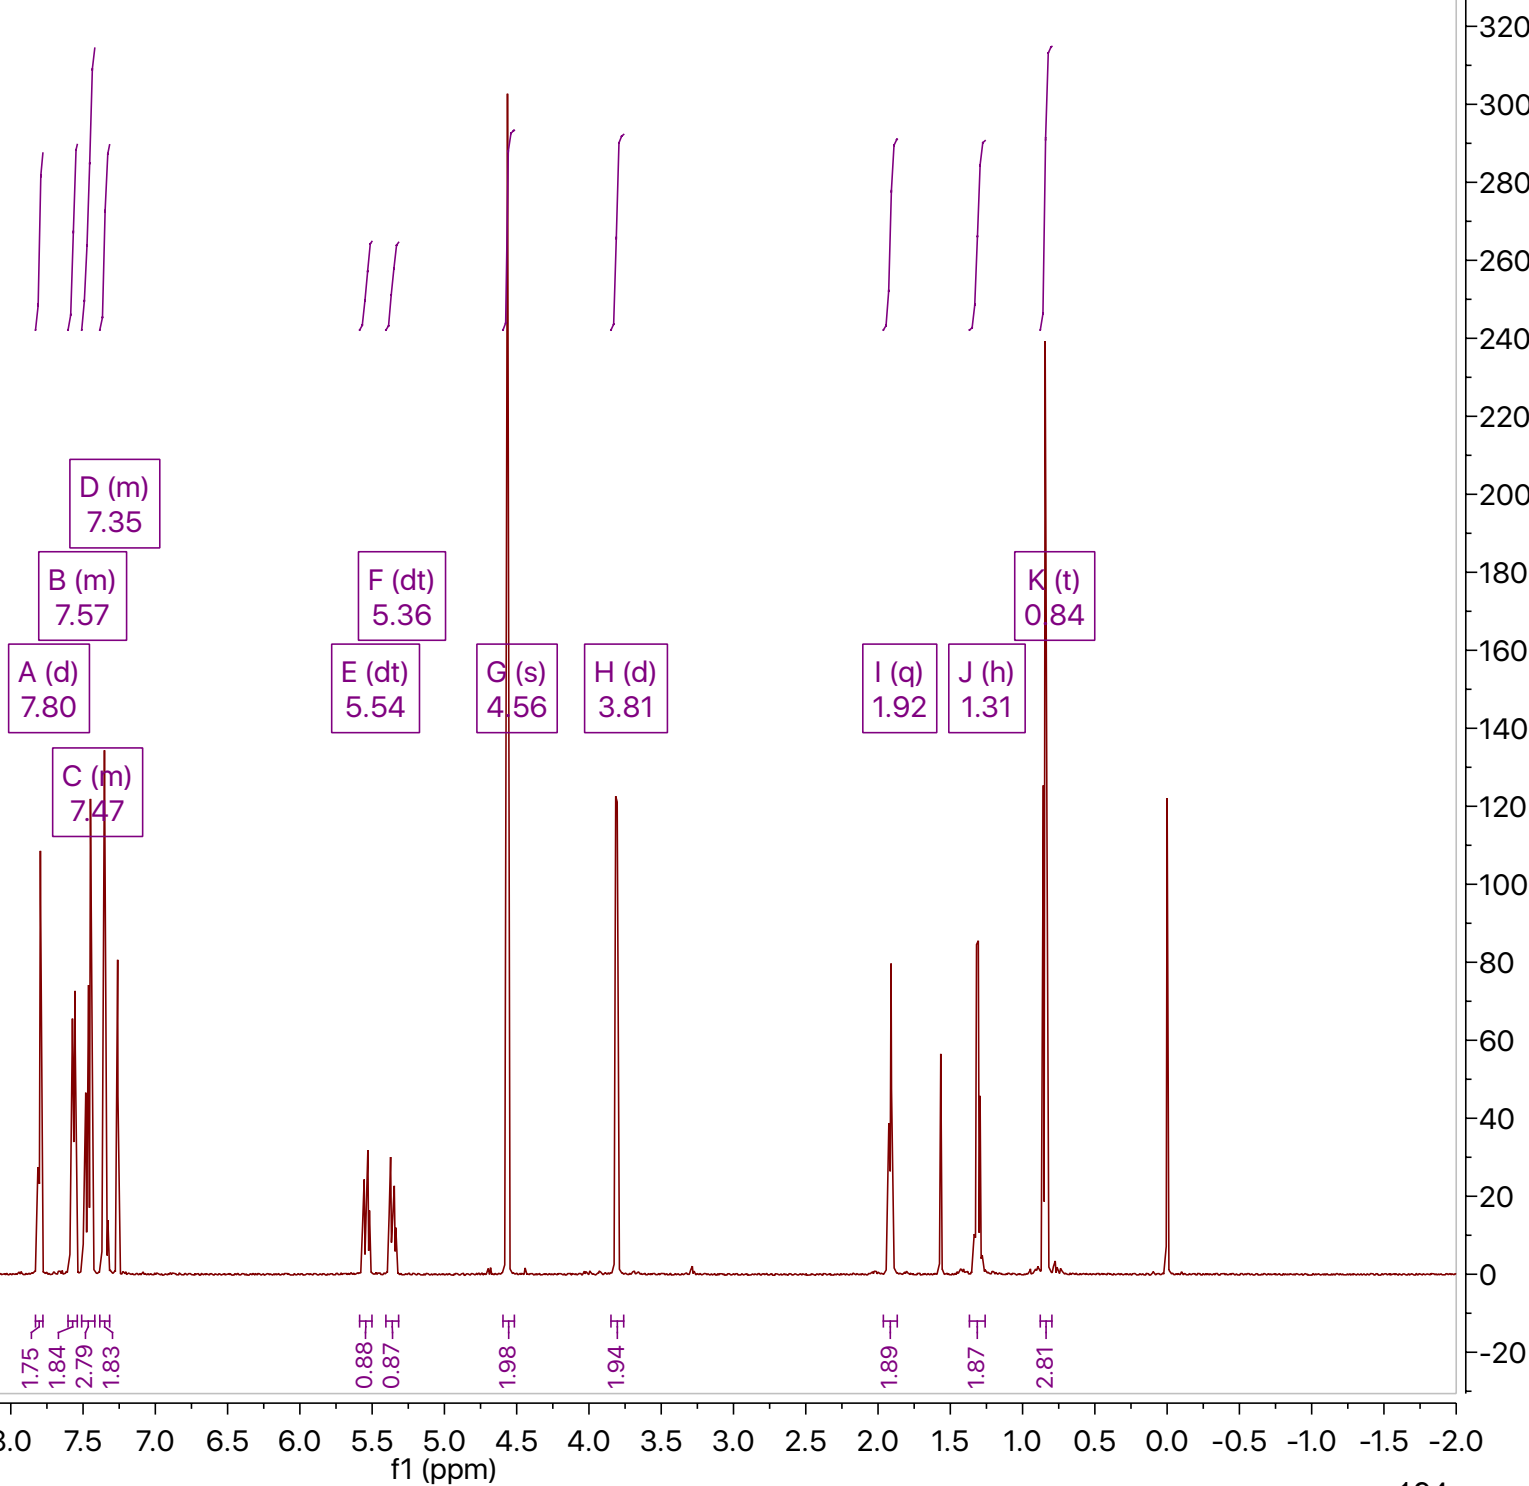



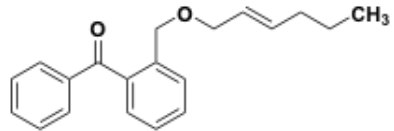

**53**

$^{13}\text{C}$ , 150 MHz,  $\text{CDCl}_3$

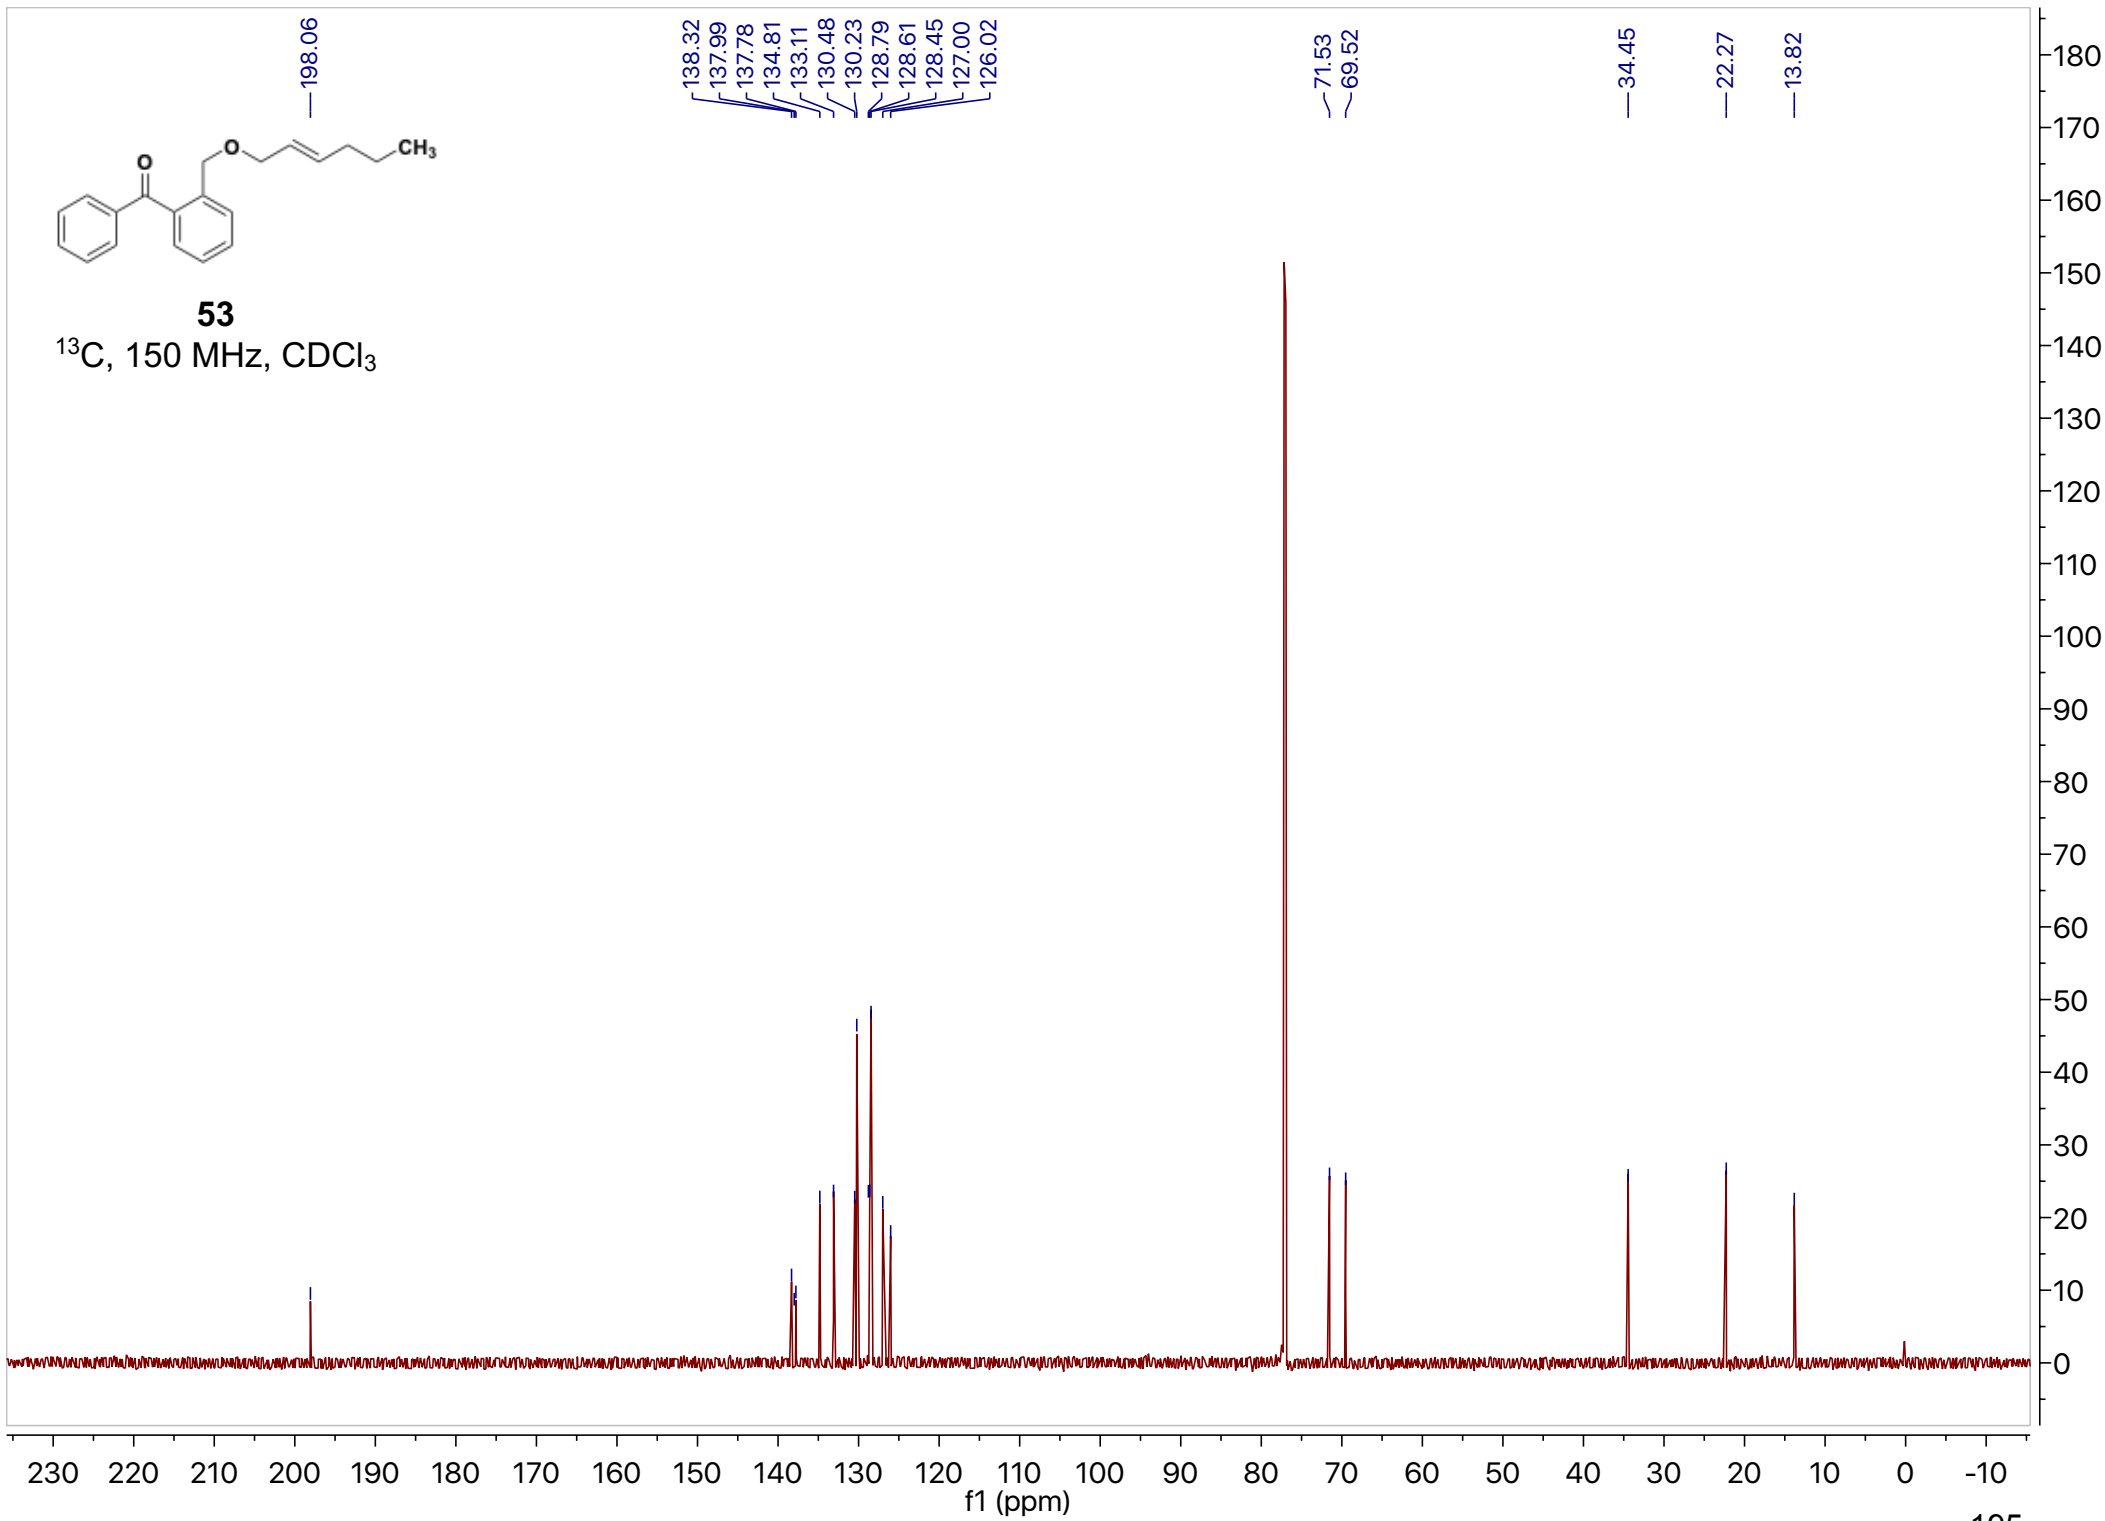

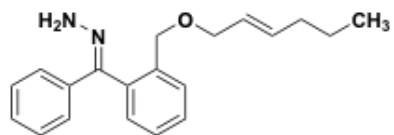

**12d**  
 $^1\text{H}$ , 400 MHz,  $\text{CDCl}_3$

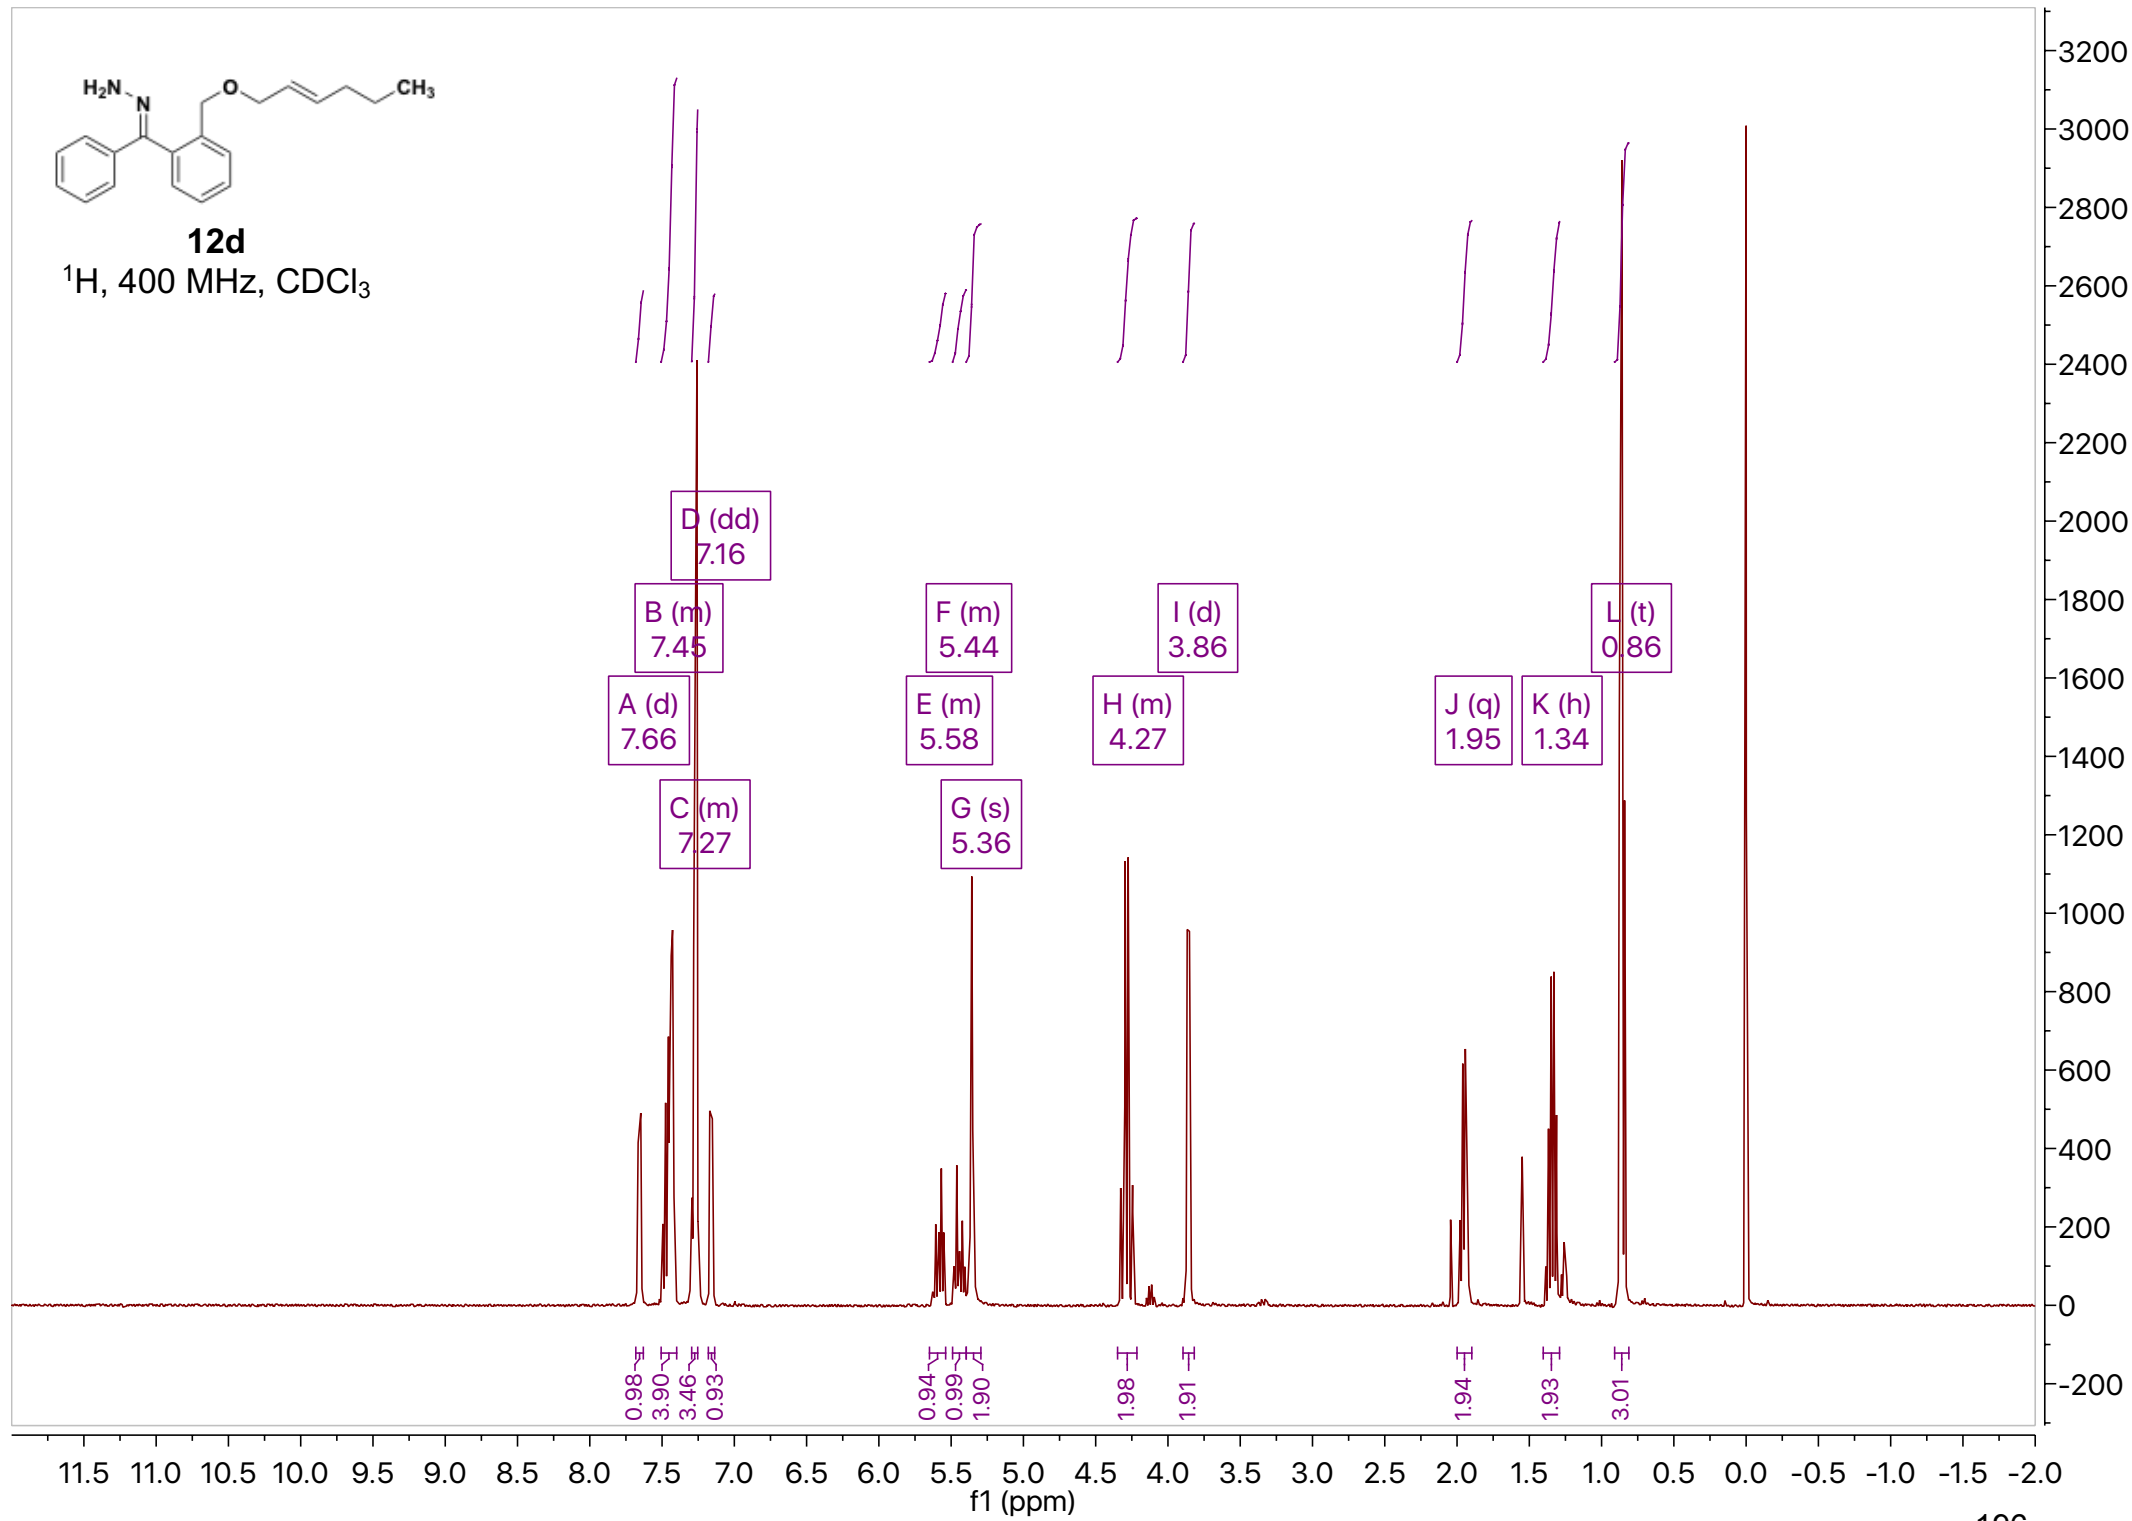

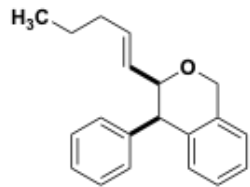

**13d**

$^1\text{H}$ , 600 MHz,  $\text{CDCl}_3$

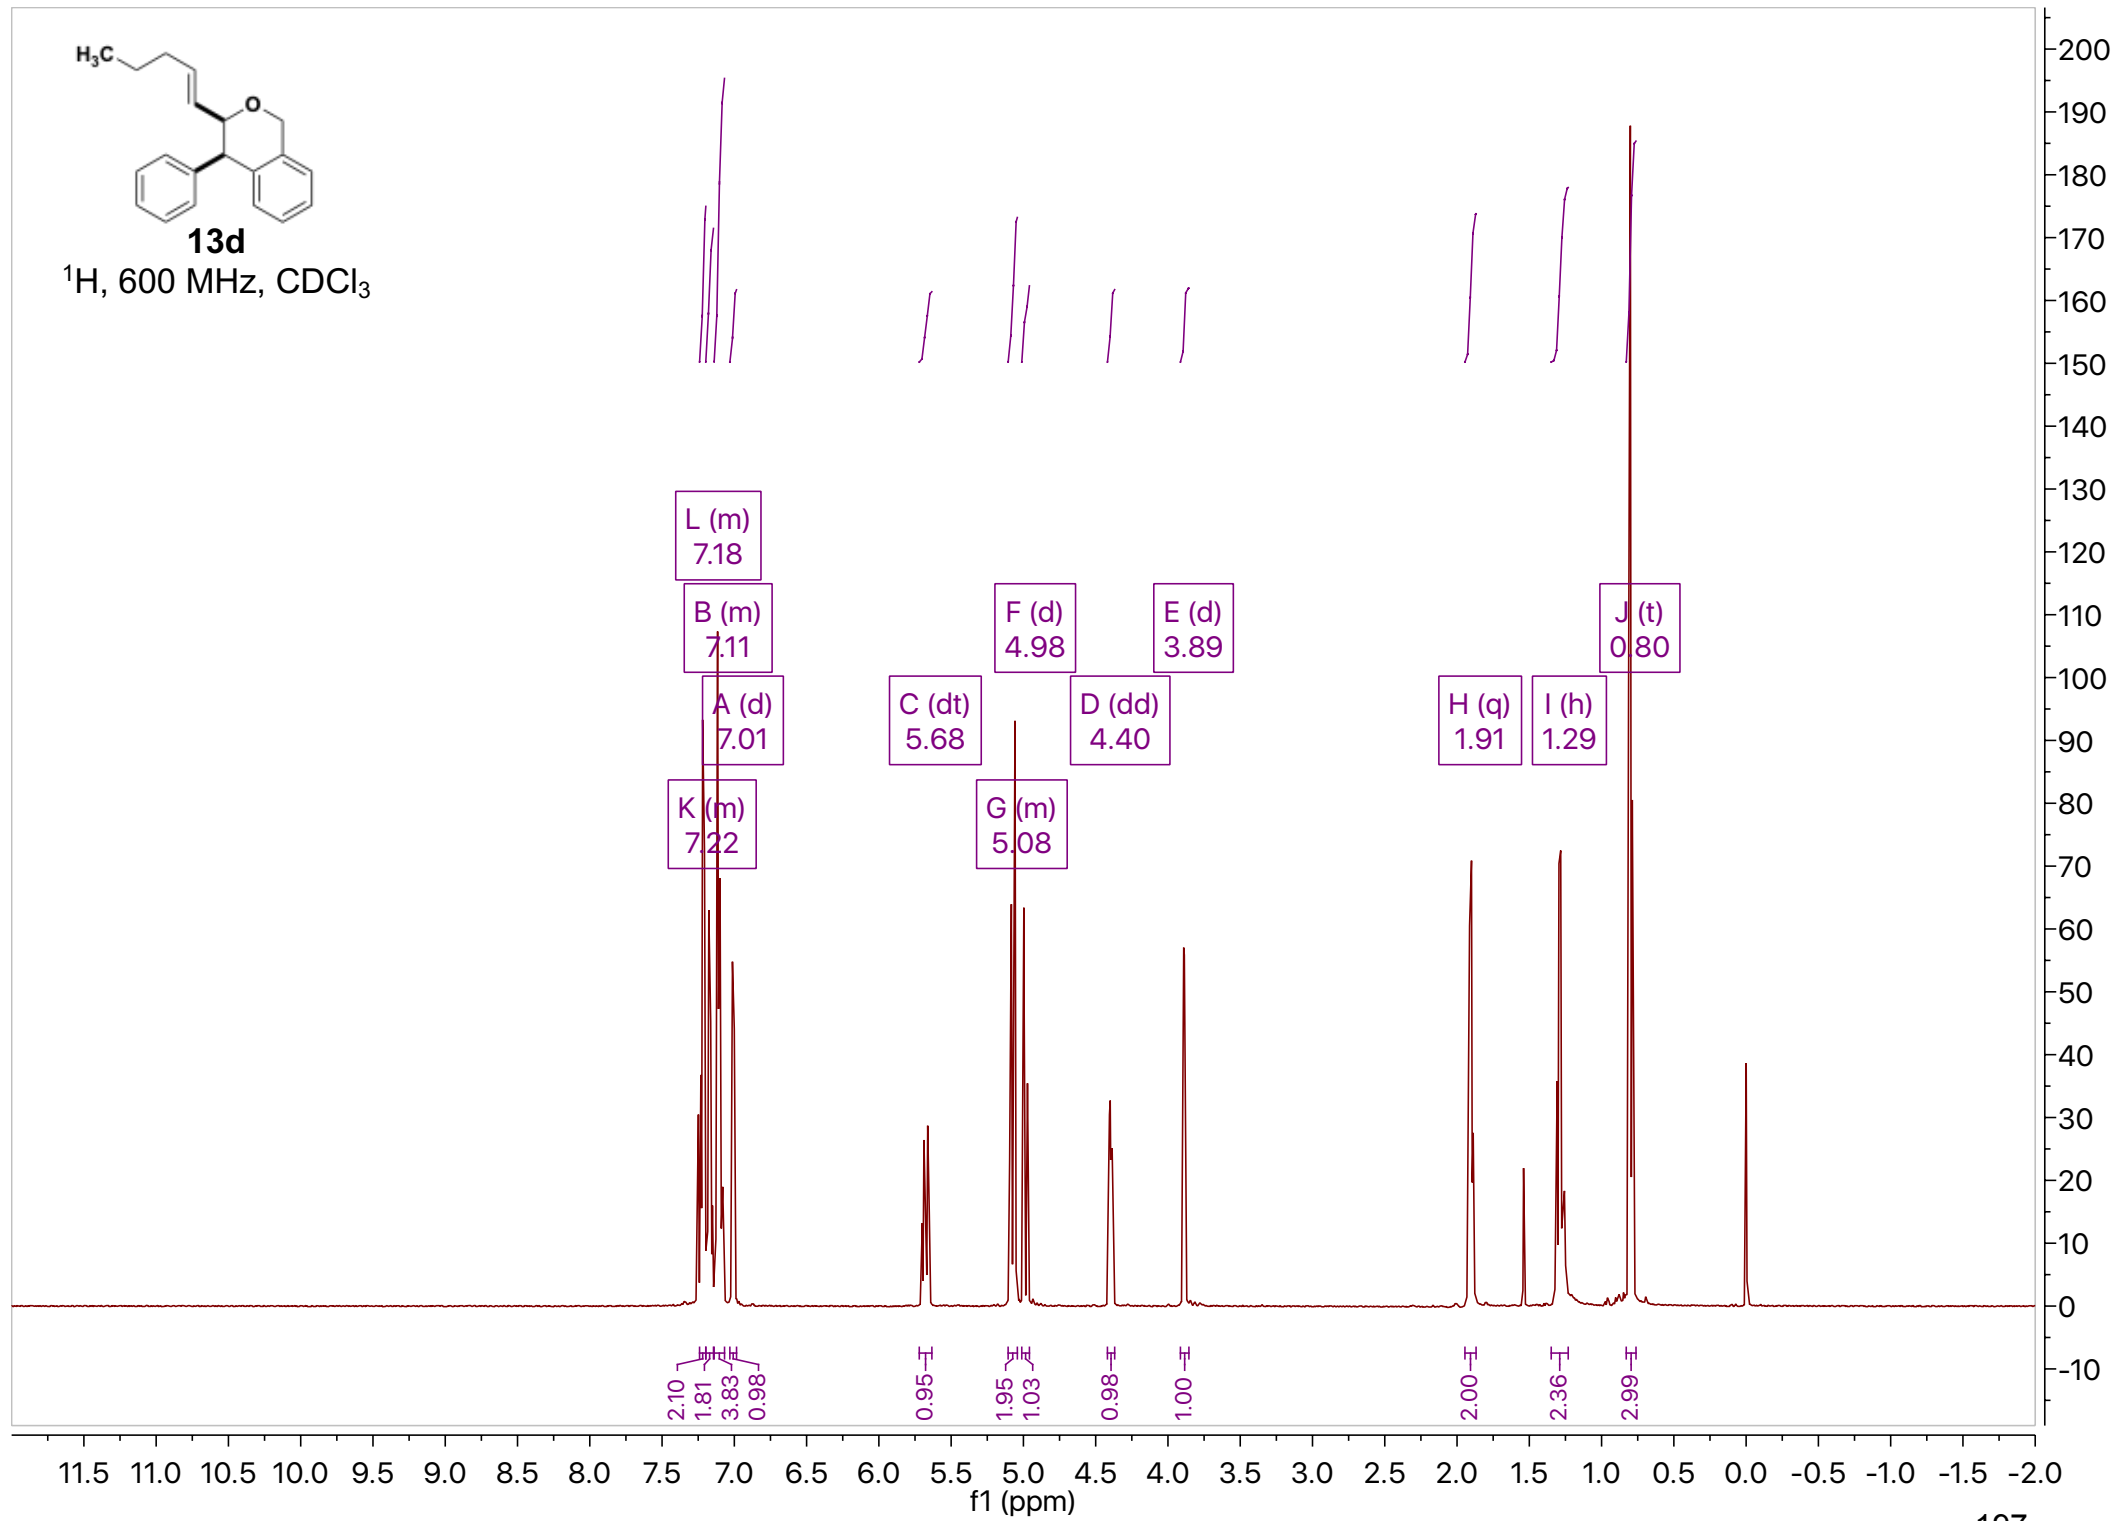

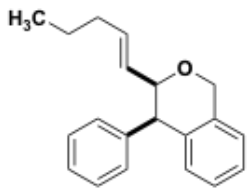

**13d**

$^{13}\text{C}$ , 150 MHz,  $\text{CDCl}_3$

141.89  
137.25  
134.22  
133.57  
130.27  
130.18  
128.92  
127.89  
126.88  
126.54  
126.41  
124.14

79.17

68.53

49.11

34.46

22.27

13.77

55  
50  
45  
40  
35  
30  
25  
20  
15  
10  
5  
0

230 220 210 200 190 180 170 160 150 140 130 120 110 100 90 80 70 60 50 40 30 20 10 0 -10

f1 (ppm)

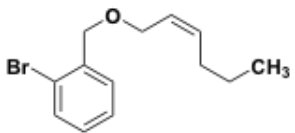

**54**

$^1\text{H}$ , 600 MHz,  $\text{CDCl}_3$

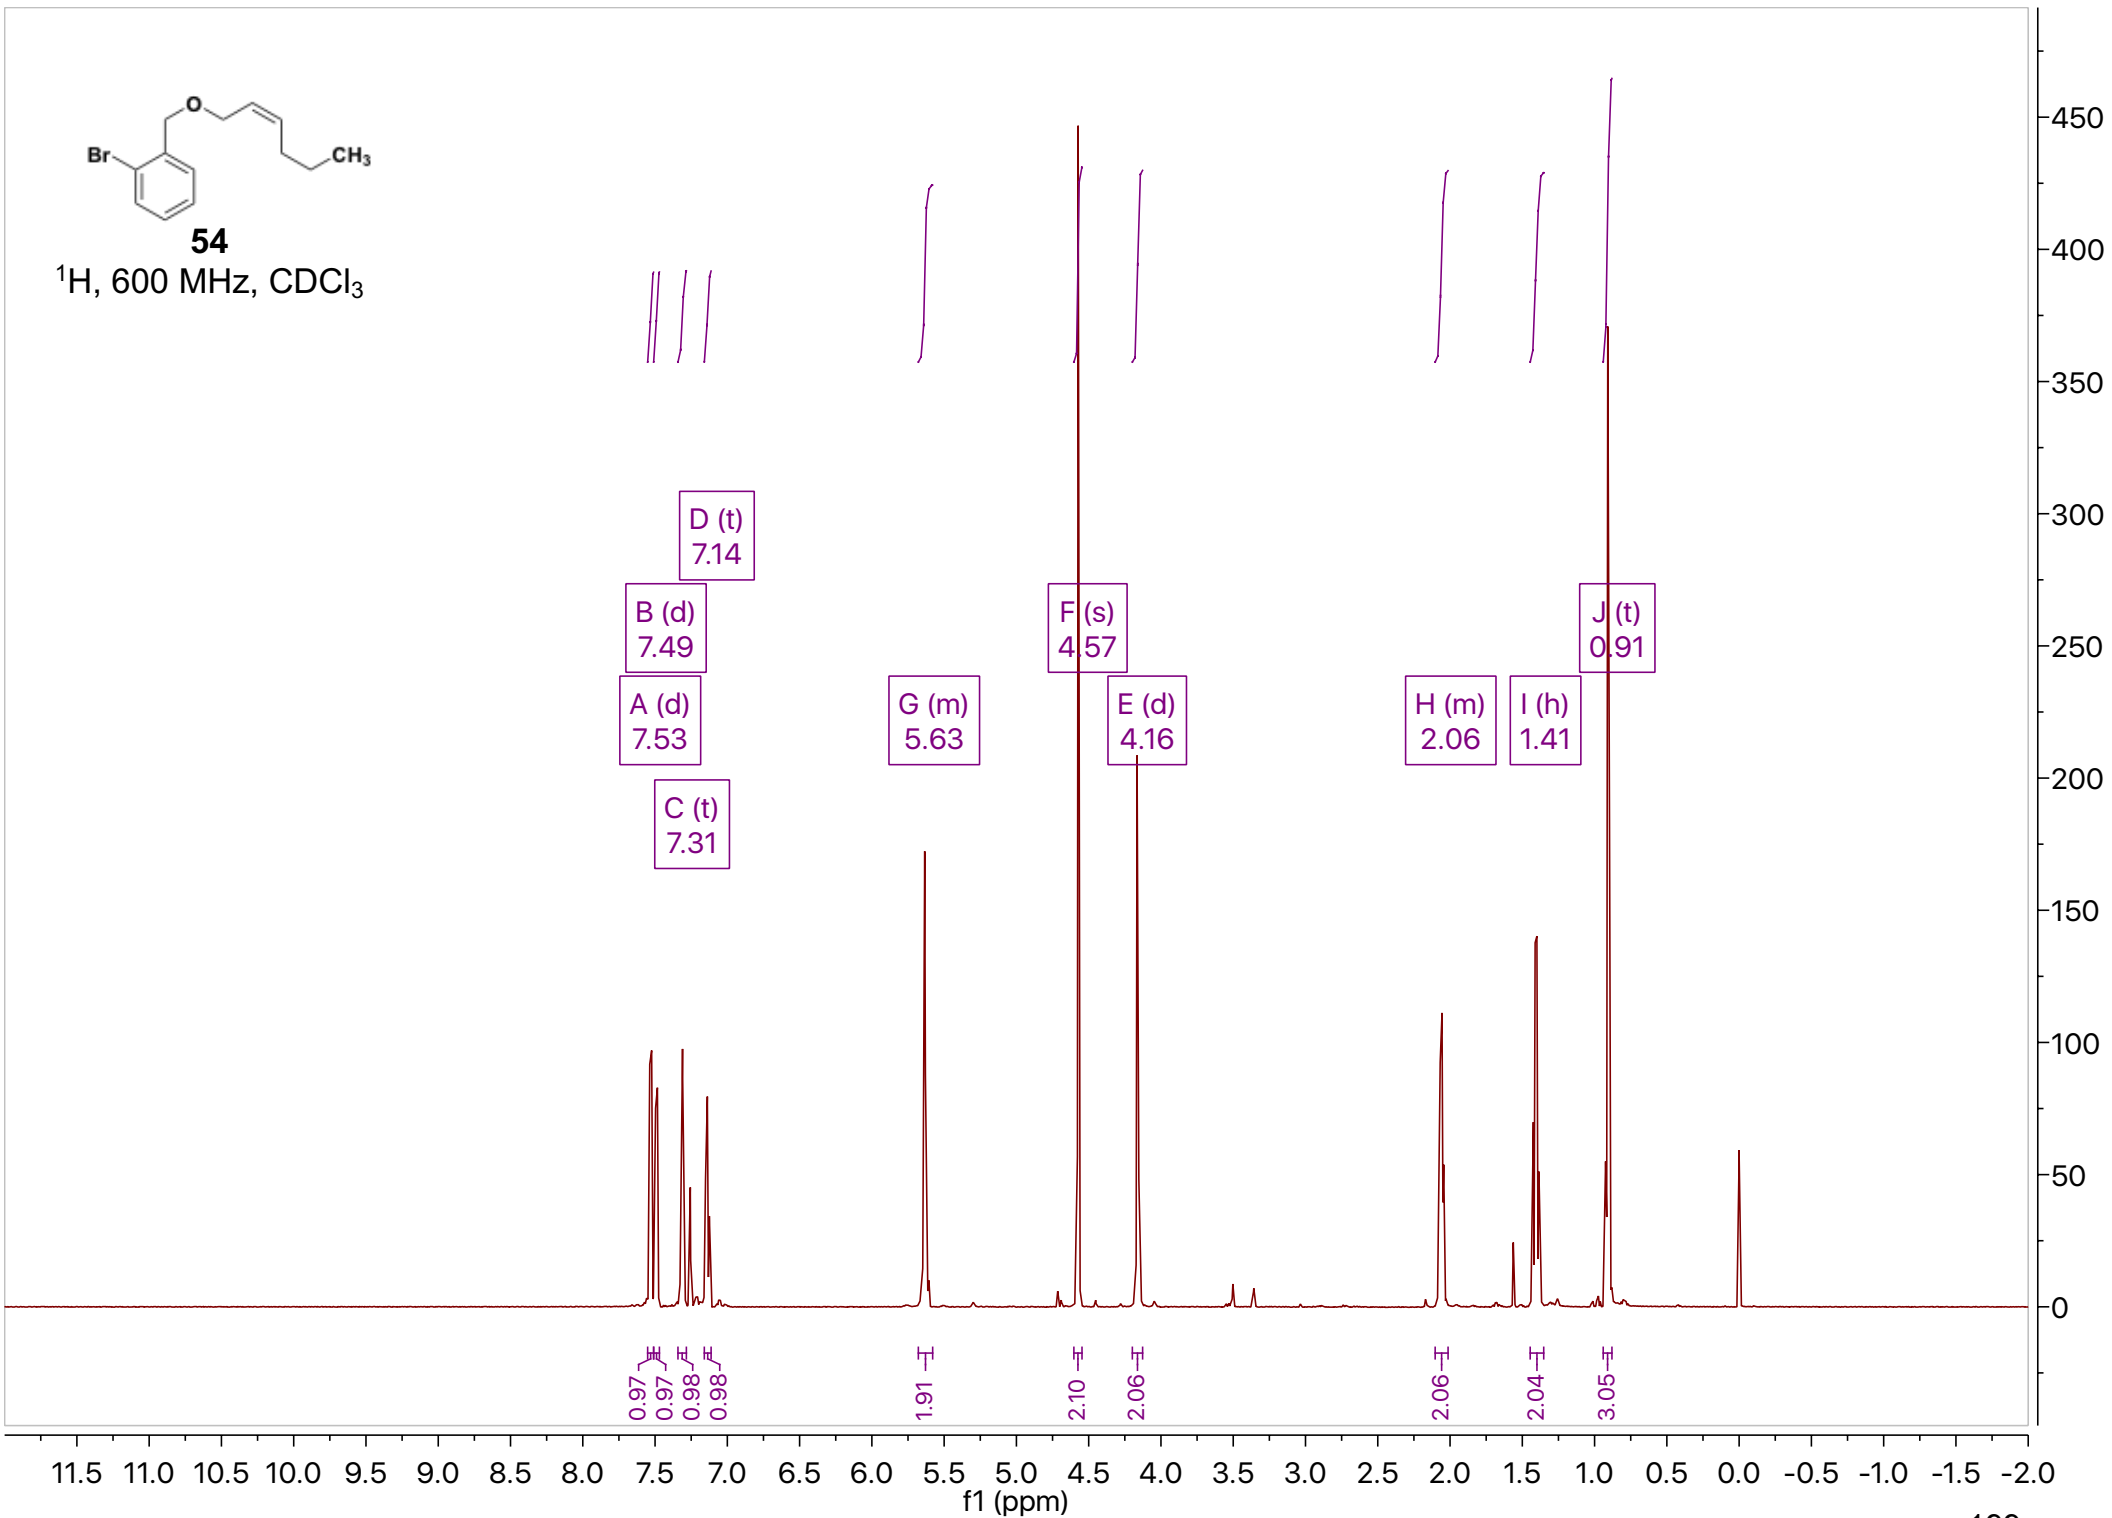

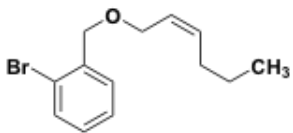

**54**

$^{13}\text{C}$ , 150 MHz,  $\text{CDCl}_3$

137.97  
134.14  
132.59  
129.15  
128.93  
127.49  
126.01  
122.82

71.47

66.47

29.79

22.84

13.88

45

40

35

30

25

20

15

10

5

0

230 220 210 200 190 180 170 160 150 140 130 120 110 100 90 80 70 60 50 40 30 20 10 0 -10

f1 (ppm)

200

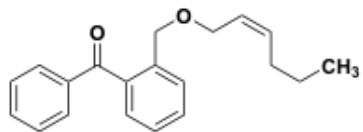

**55**

$^1\text{H}$ , 600 MHz,  $\text{CDCl}_3$

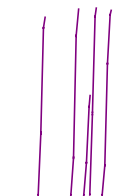

D (t)  
7.45

B (m)  
7.57

A (d)  
7.80

C (t)  
7.48

E (m)  
7.35

G (m)  
5.37

F (m)  
5.48

H (s)  
4.58

I (d)  
3.93

J (q)  
1.93

K (h)  
1.31

L (t)  
0.85

1.82  
1.90  
1.02  
1.91  
1.89

0.92  
0.91

2.05

2.00

1.92

1.91

2.90

11.5 11.0 10.5 10.0 9.5 9.0 8.5 8.0 7.5 7.0 6.5 6.0 5.5 5.0 4.5 4.0 3.5 3.0 2.5 2.0 1.5 1.0 0.5 0.0 -0.5 -1.0 -1.5 -2.0  
f1 (ppm)

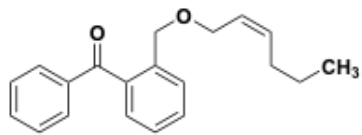

**55**

$^{13}\text{C}$ , 150 MHz,  $\text{CDCl}_3$

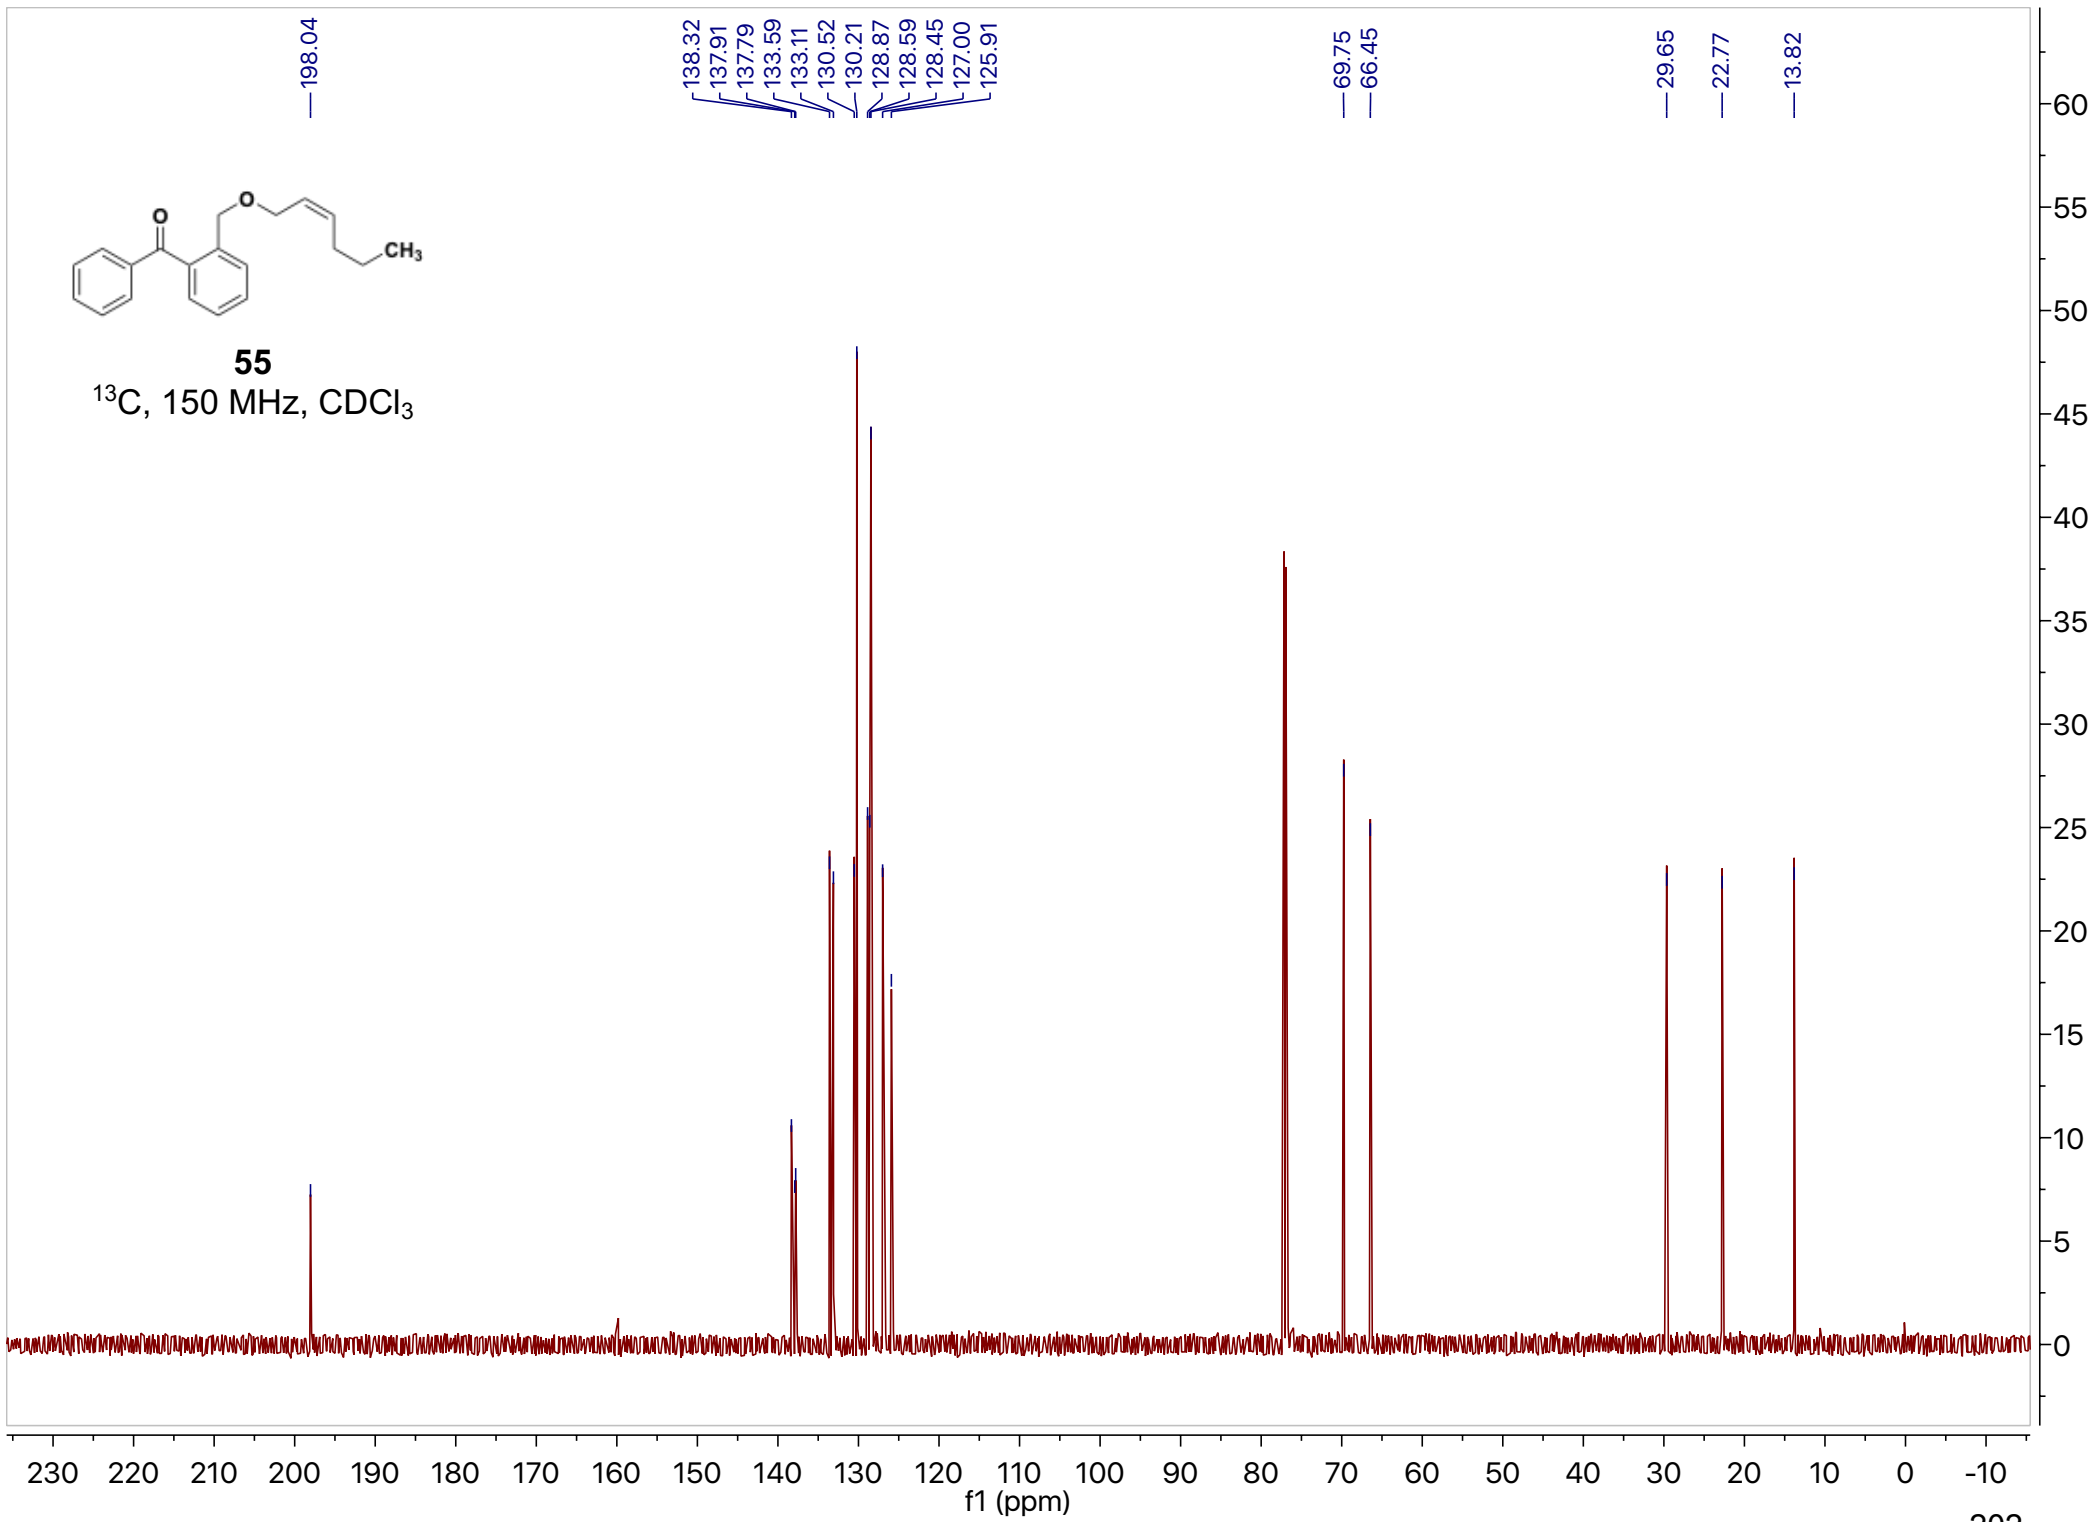



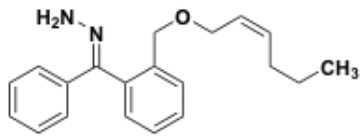

**12e**

$^1\text{H}$ , 600 MHz,  $\text{CDCl}_3$

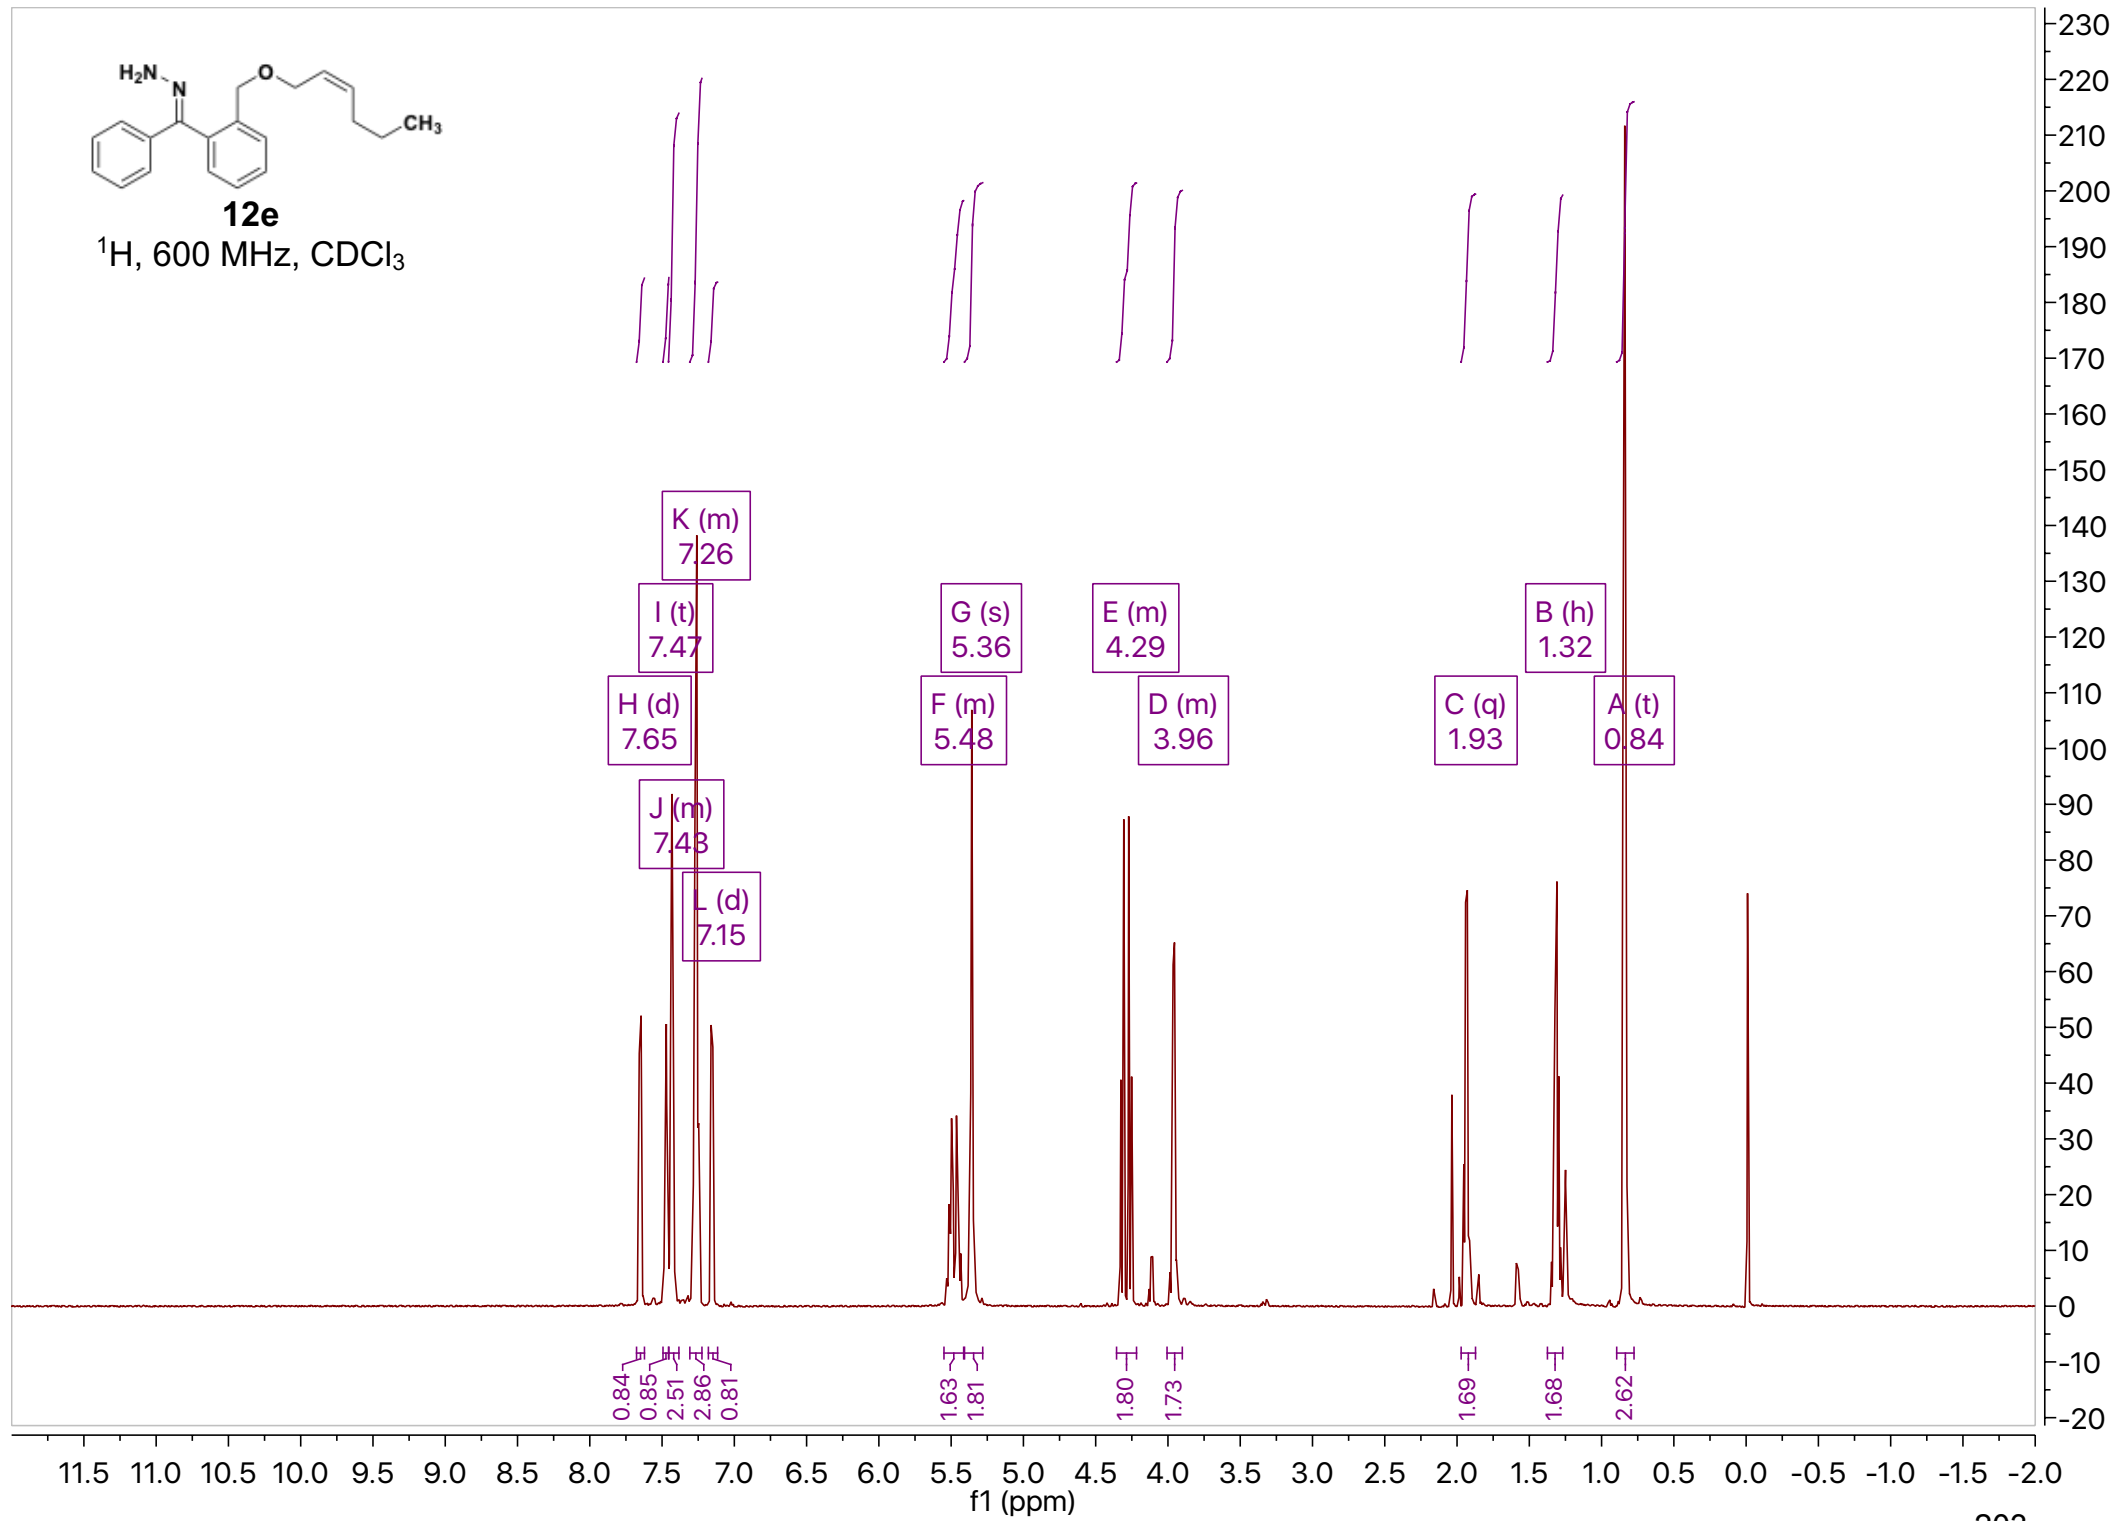

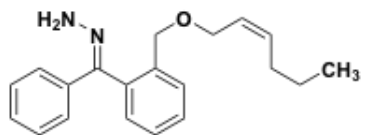

**12e**

$^{13}\text{C}$ , 150 MHz,  $\text{CDCl}_3$

148.34  
137.89  
137.40  
133.53  
131.89  
129.27  
128.95  
128.74  
128.60  
128.20  
128.09  
125.91  
125.87

69.69  
66.51

29.54  
22.60

13.67

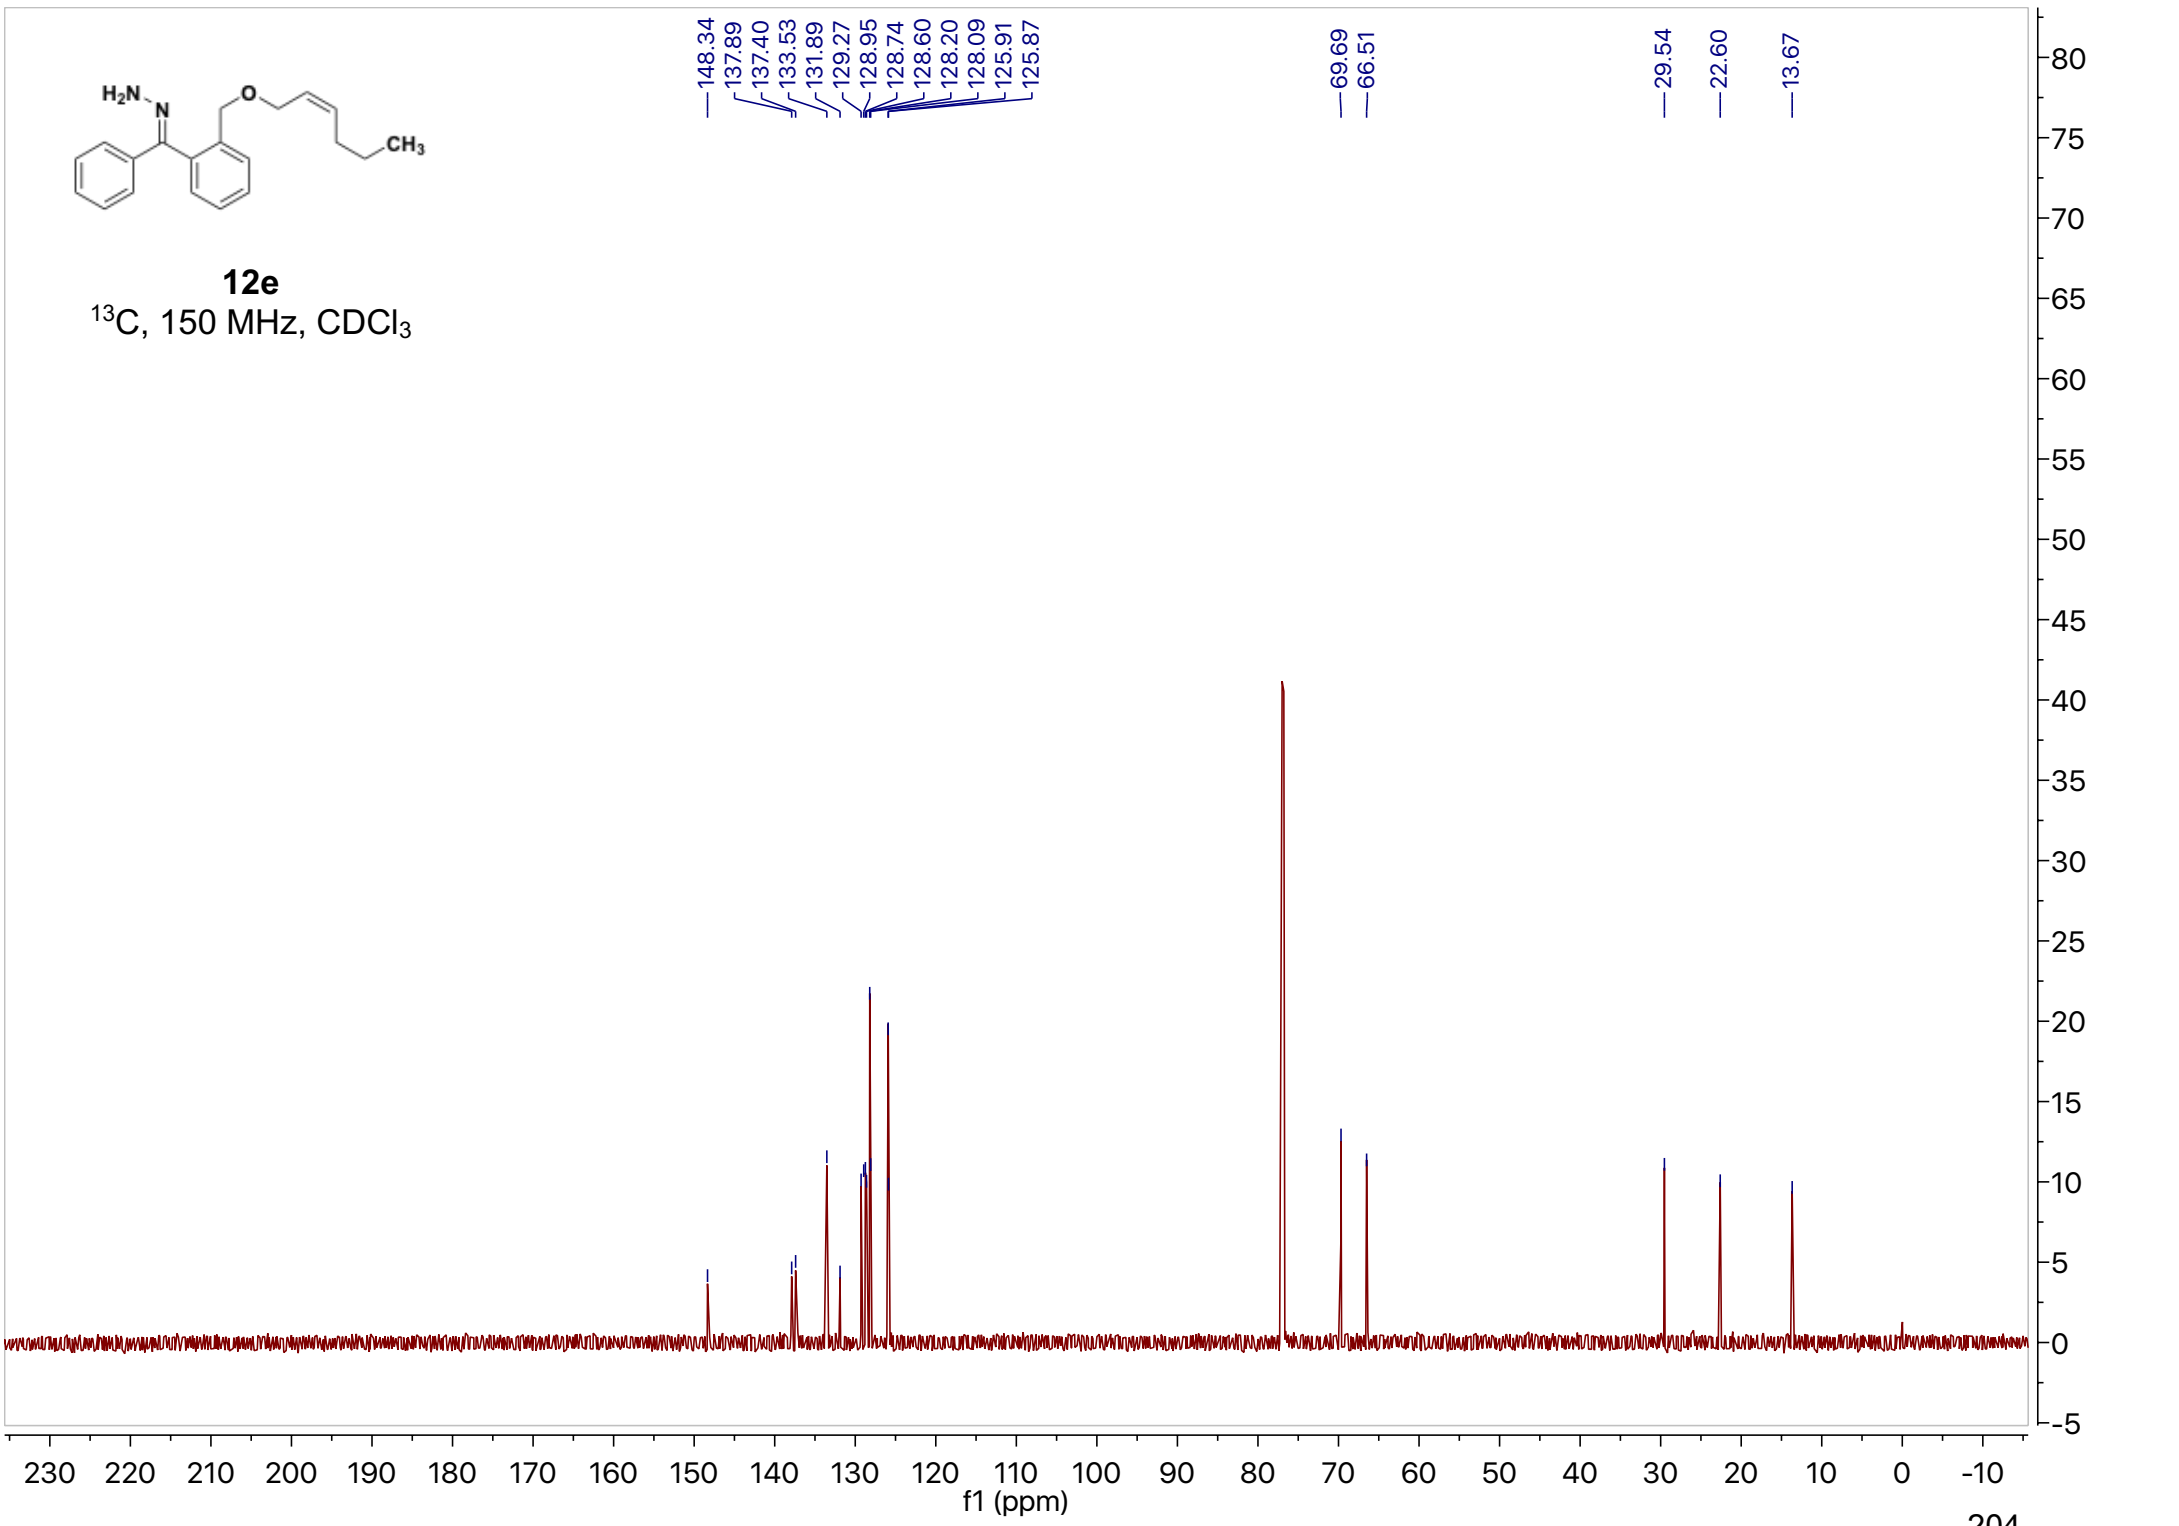

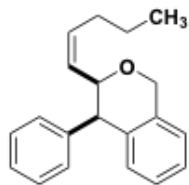

**13e**

<sup>1</sup>H, 600 MHz, CDCl<sub>3</sub>

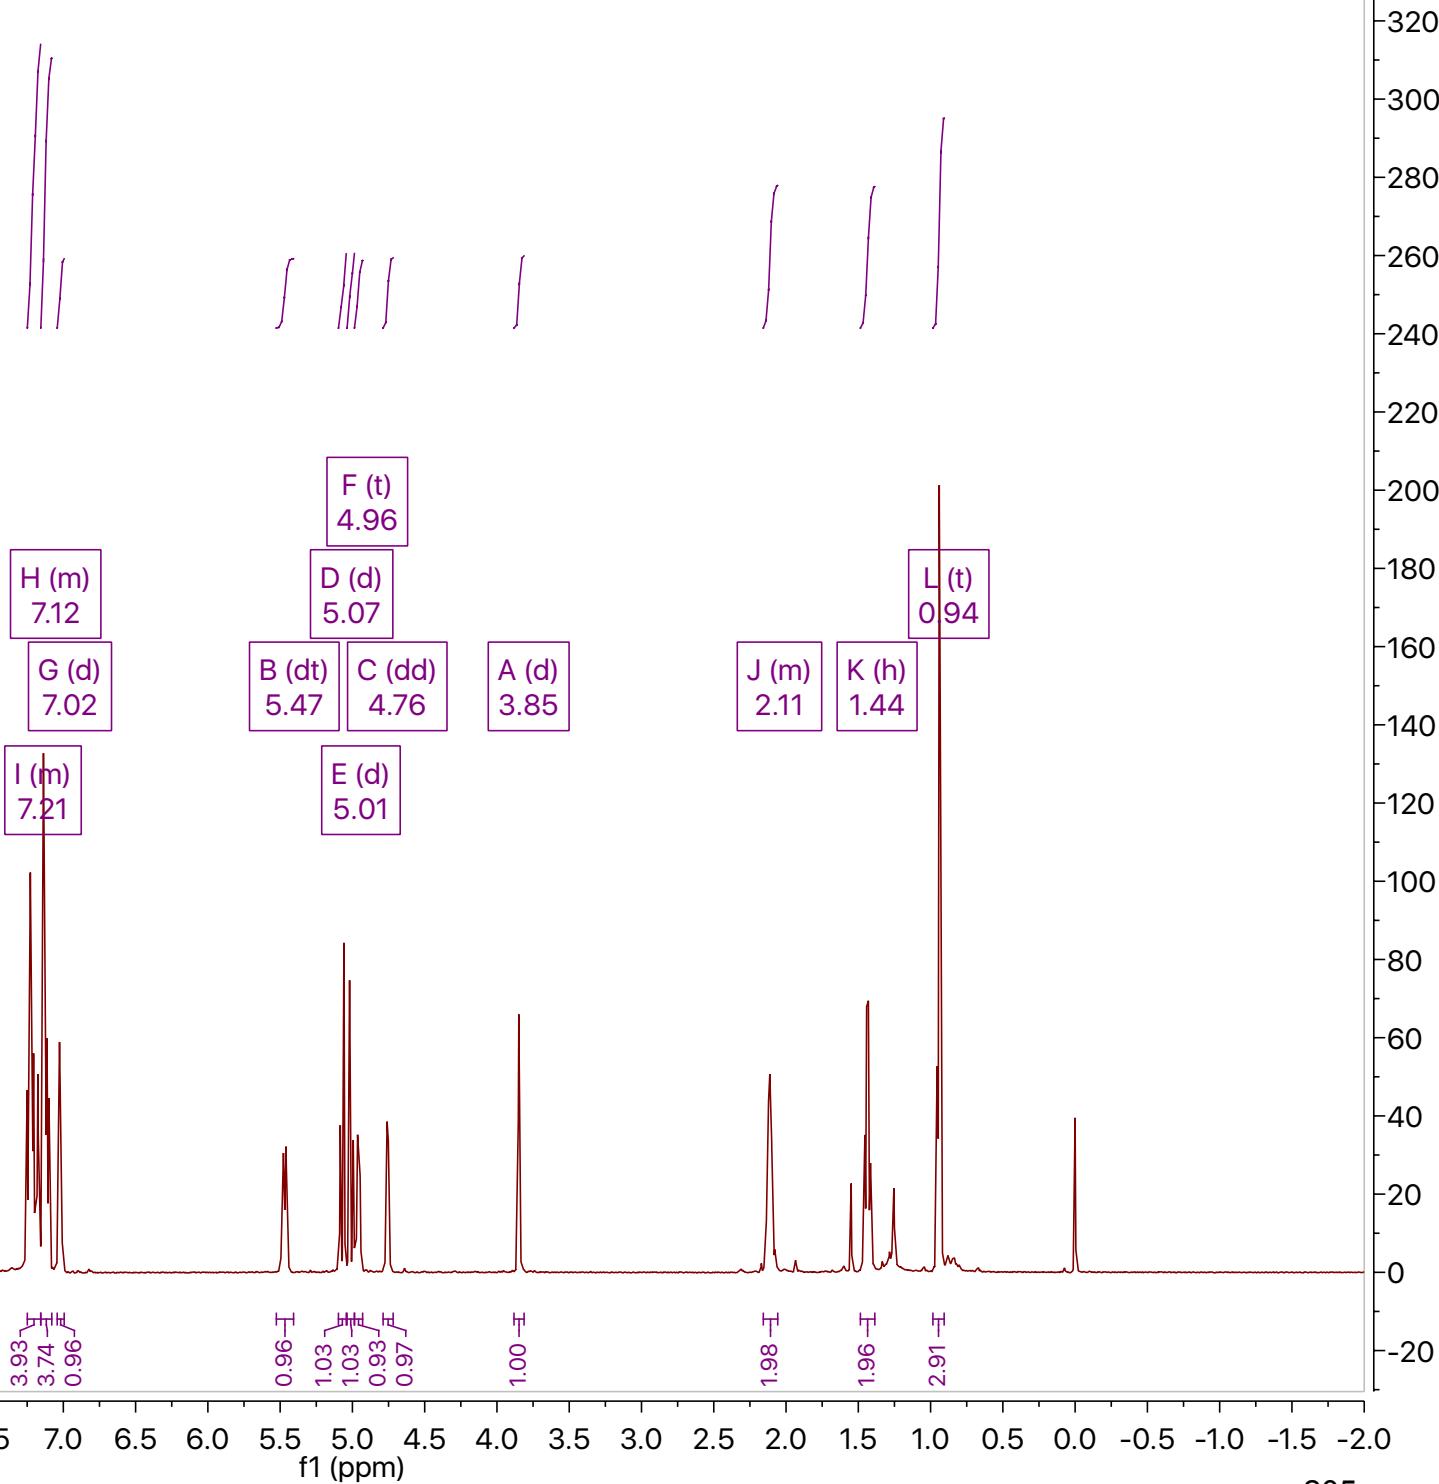



**13e**

$^{13}\text{C}$ , 150 MHz,  $\text{CDCl}_3$

141.81  
137.26  
134.24  
132.38  
130.30  
130.22  
128.66  
127.92  
126.88  
126.61  
126.47  
124.22

74.34

68.43

48.39

30.37

22.88

14.03

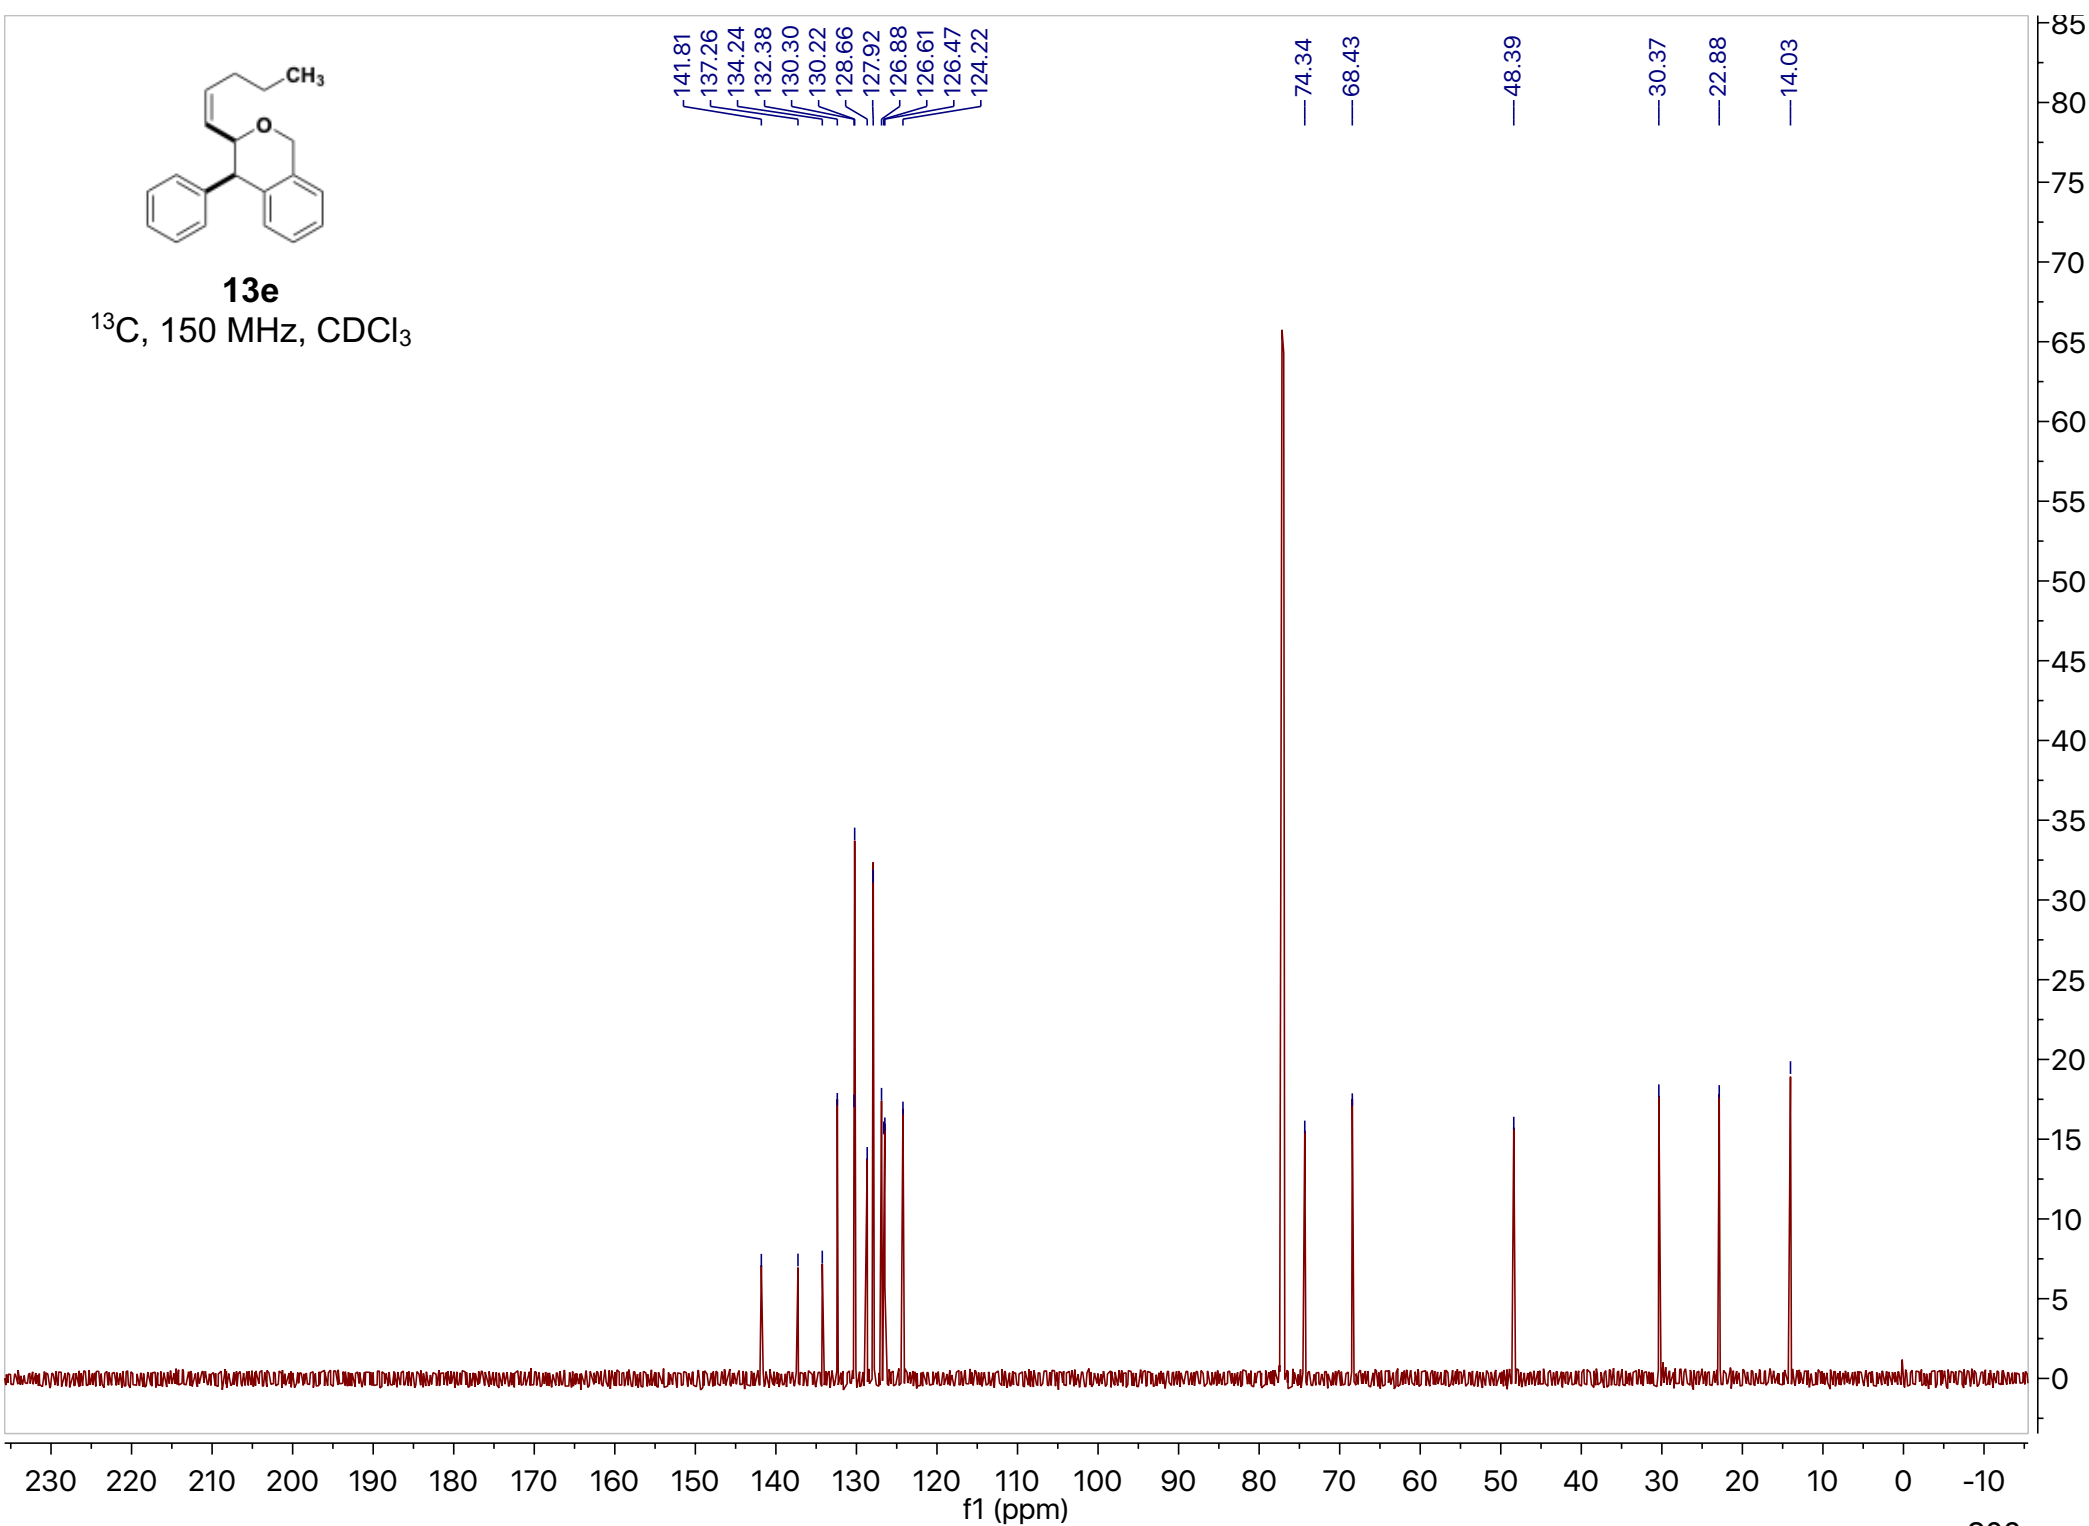

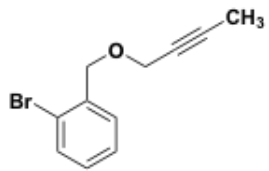

**56**

<sup>1</sup>H, 600 MHz, CDCl<sub>3</sub>

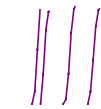

D (t)  
7.14

B (d)  
7.49

A (d)  
7.54

C (t)  
7.31

E (s)  
4.65

F (s)  
4.22

G (s)  
1.88

1.00  
0.98  
1.03  
1.01

1.99

2.02

3.01

11.5 11.0 10.5 10.0 9.5 9.0 8.5 8.0 7.5 7.0 6.5 6.0 5.5 5.0 4.5 4.0 3.5 3.0 2.5 2.0 1.5 1.0 0.5 0.0 -0.5 -1.0 -1.5 -2.0

f1 (ppm)

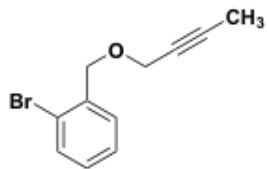

**56**

$^{13}\text{C}$ , 150 MHz,  $\text{CDCl}_3$

137.28  
132.64  
129.39  
129.13  
127.51  
122.99

83.11

75.00

71.00

58.58

3.84

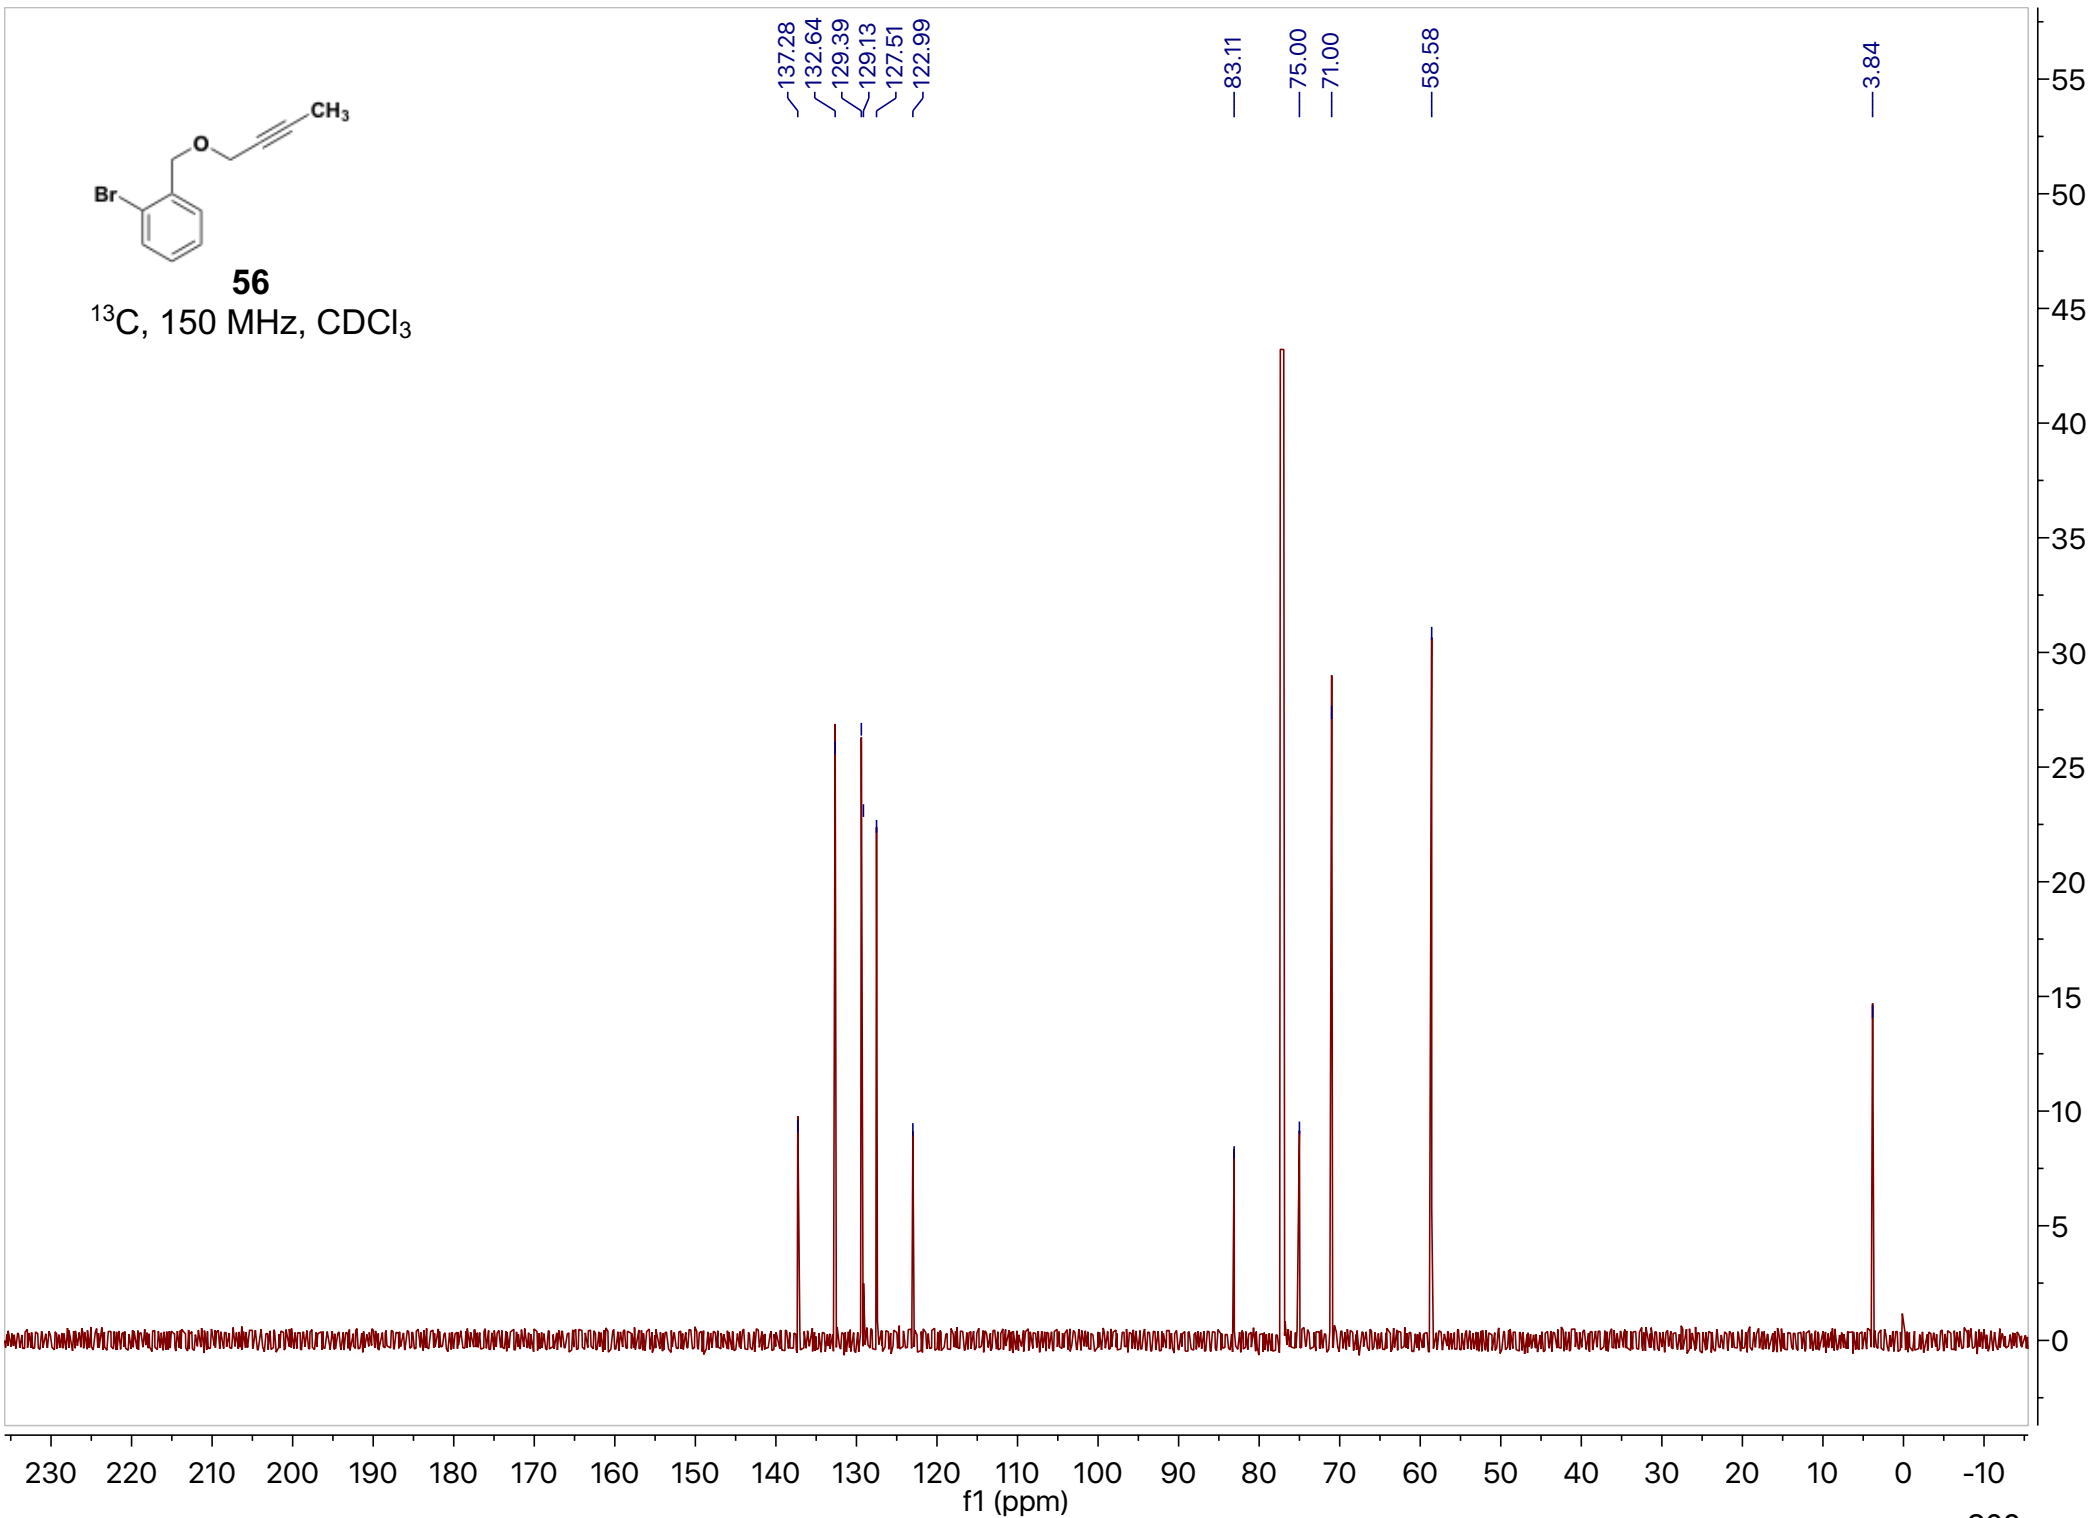

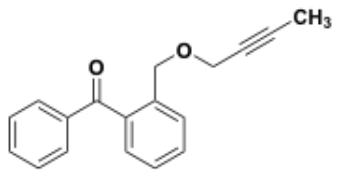

**57**

$^1\text{H}$ , 400 MHz,  $\text{CDCl}_3$

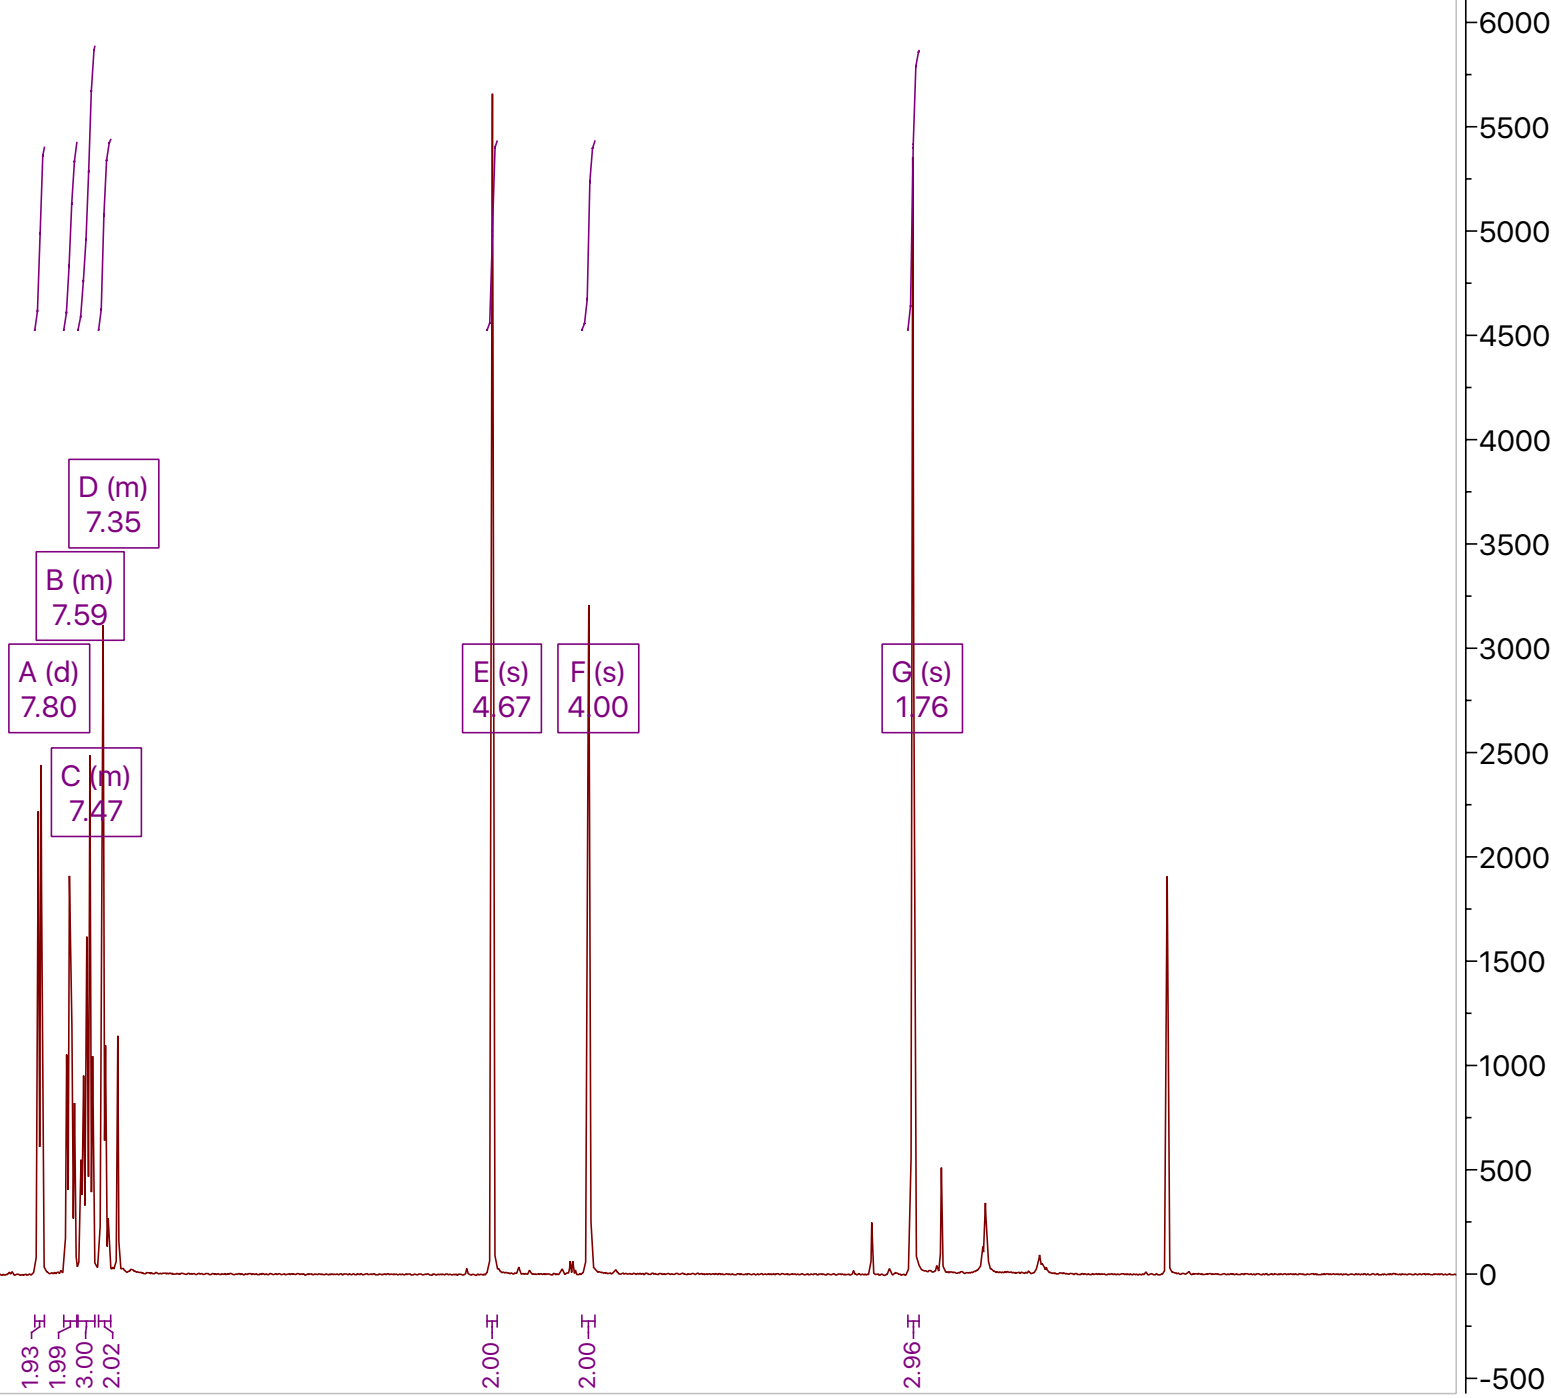

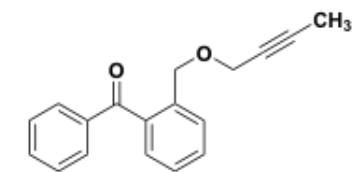

**57**

$^{13}\text{C}$ , 100 MHz,  $\text{CDCl}_3$

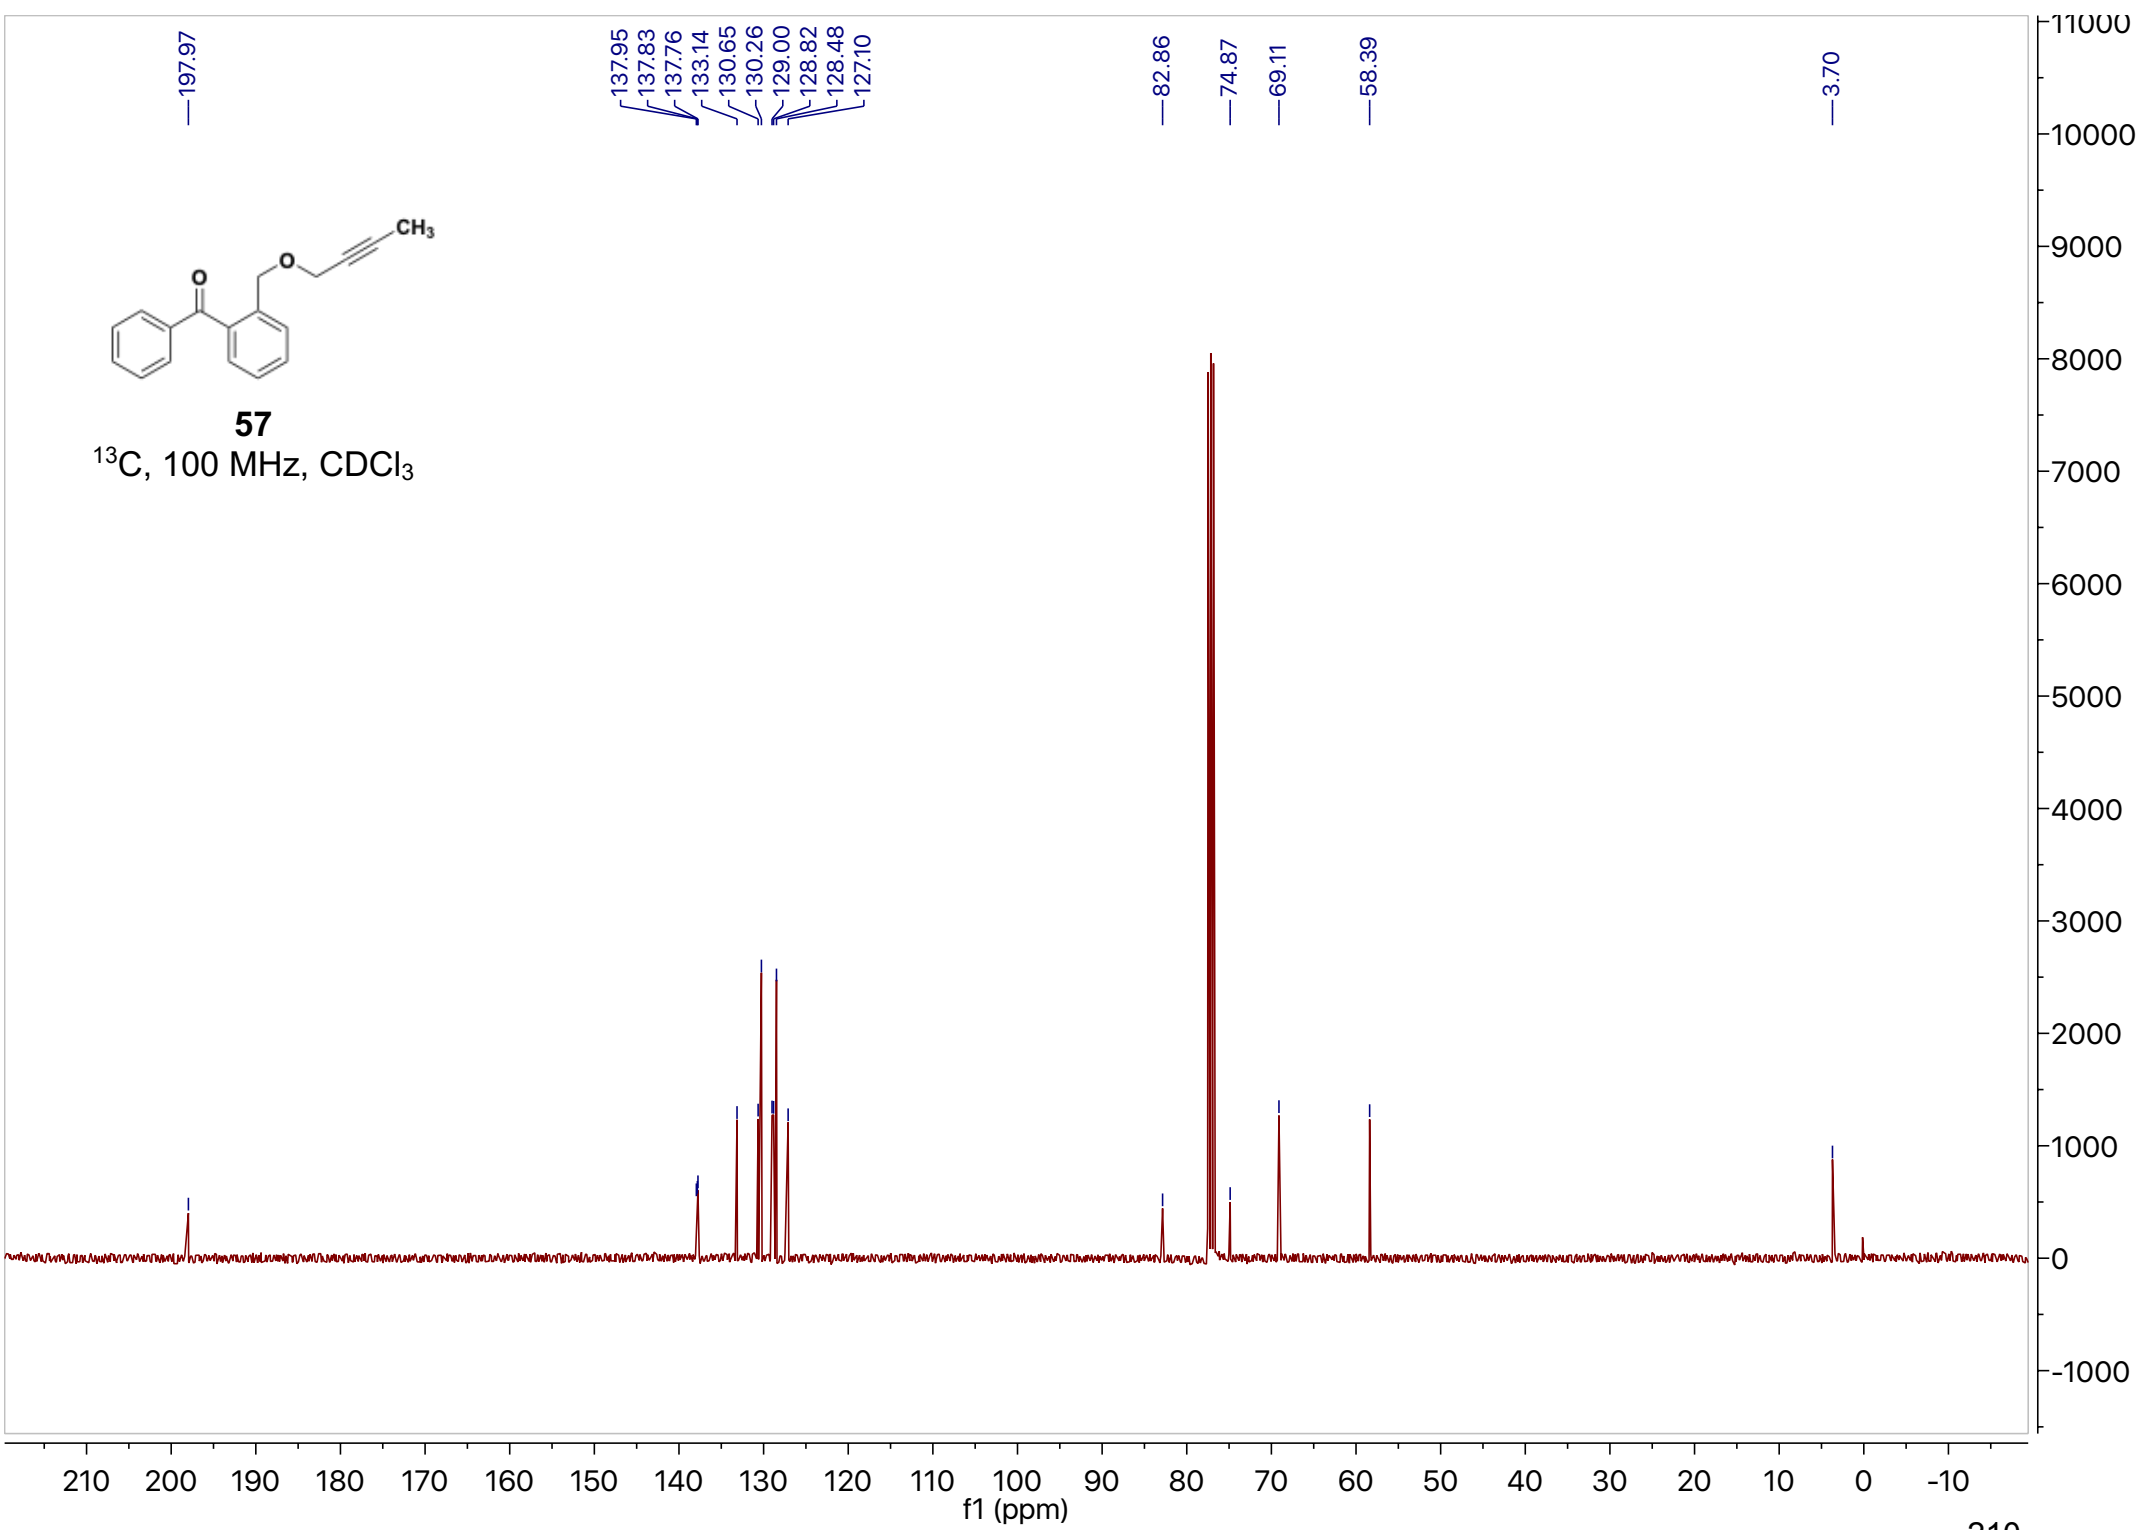



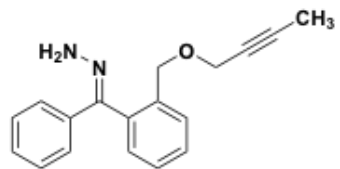

**12f**  
 $^1\text{H}$ , 400 MHz,  $\text{CDCl}_3$

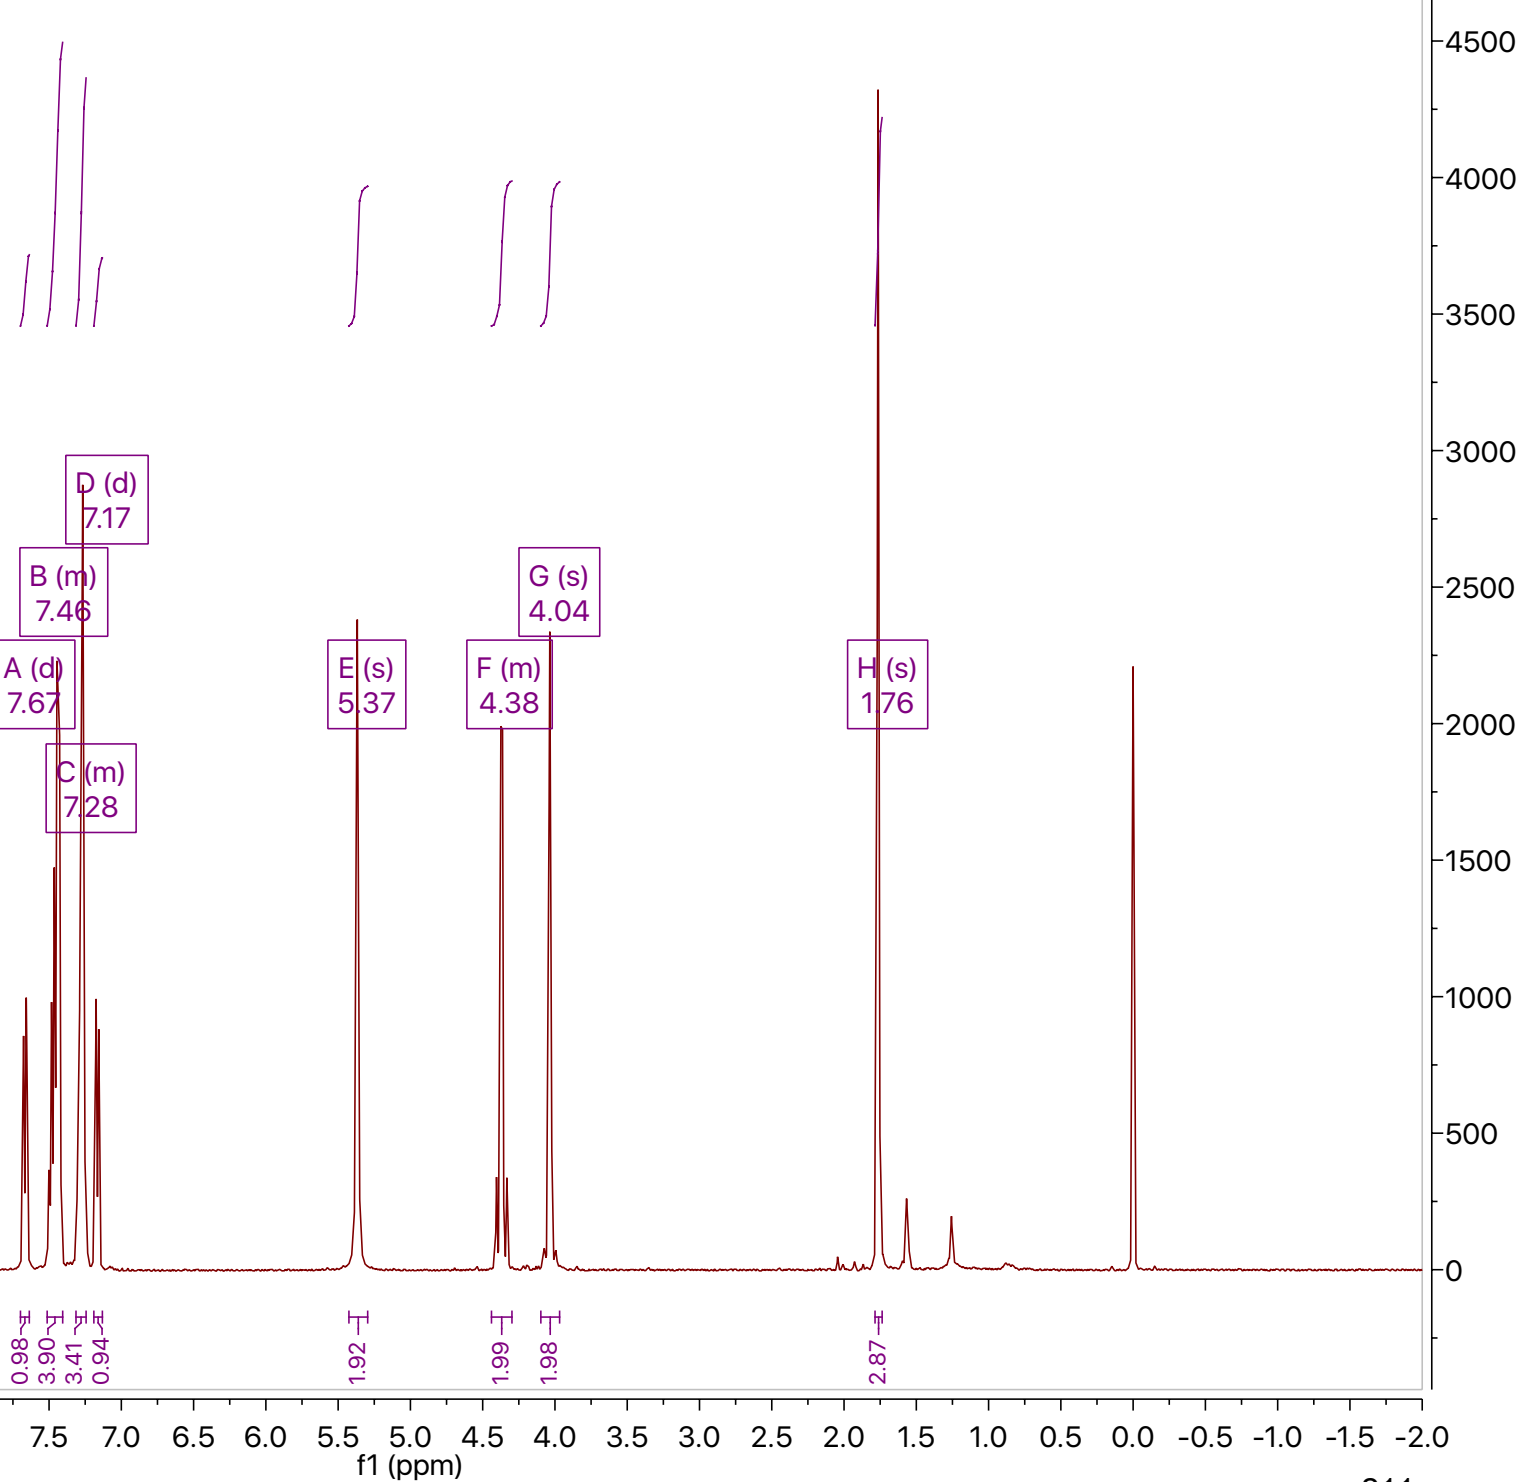

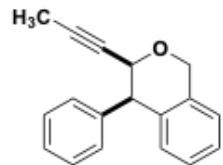

**13f**

$^1\text{H}$ , 600 MHz,  $\text{CDCl}_3$

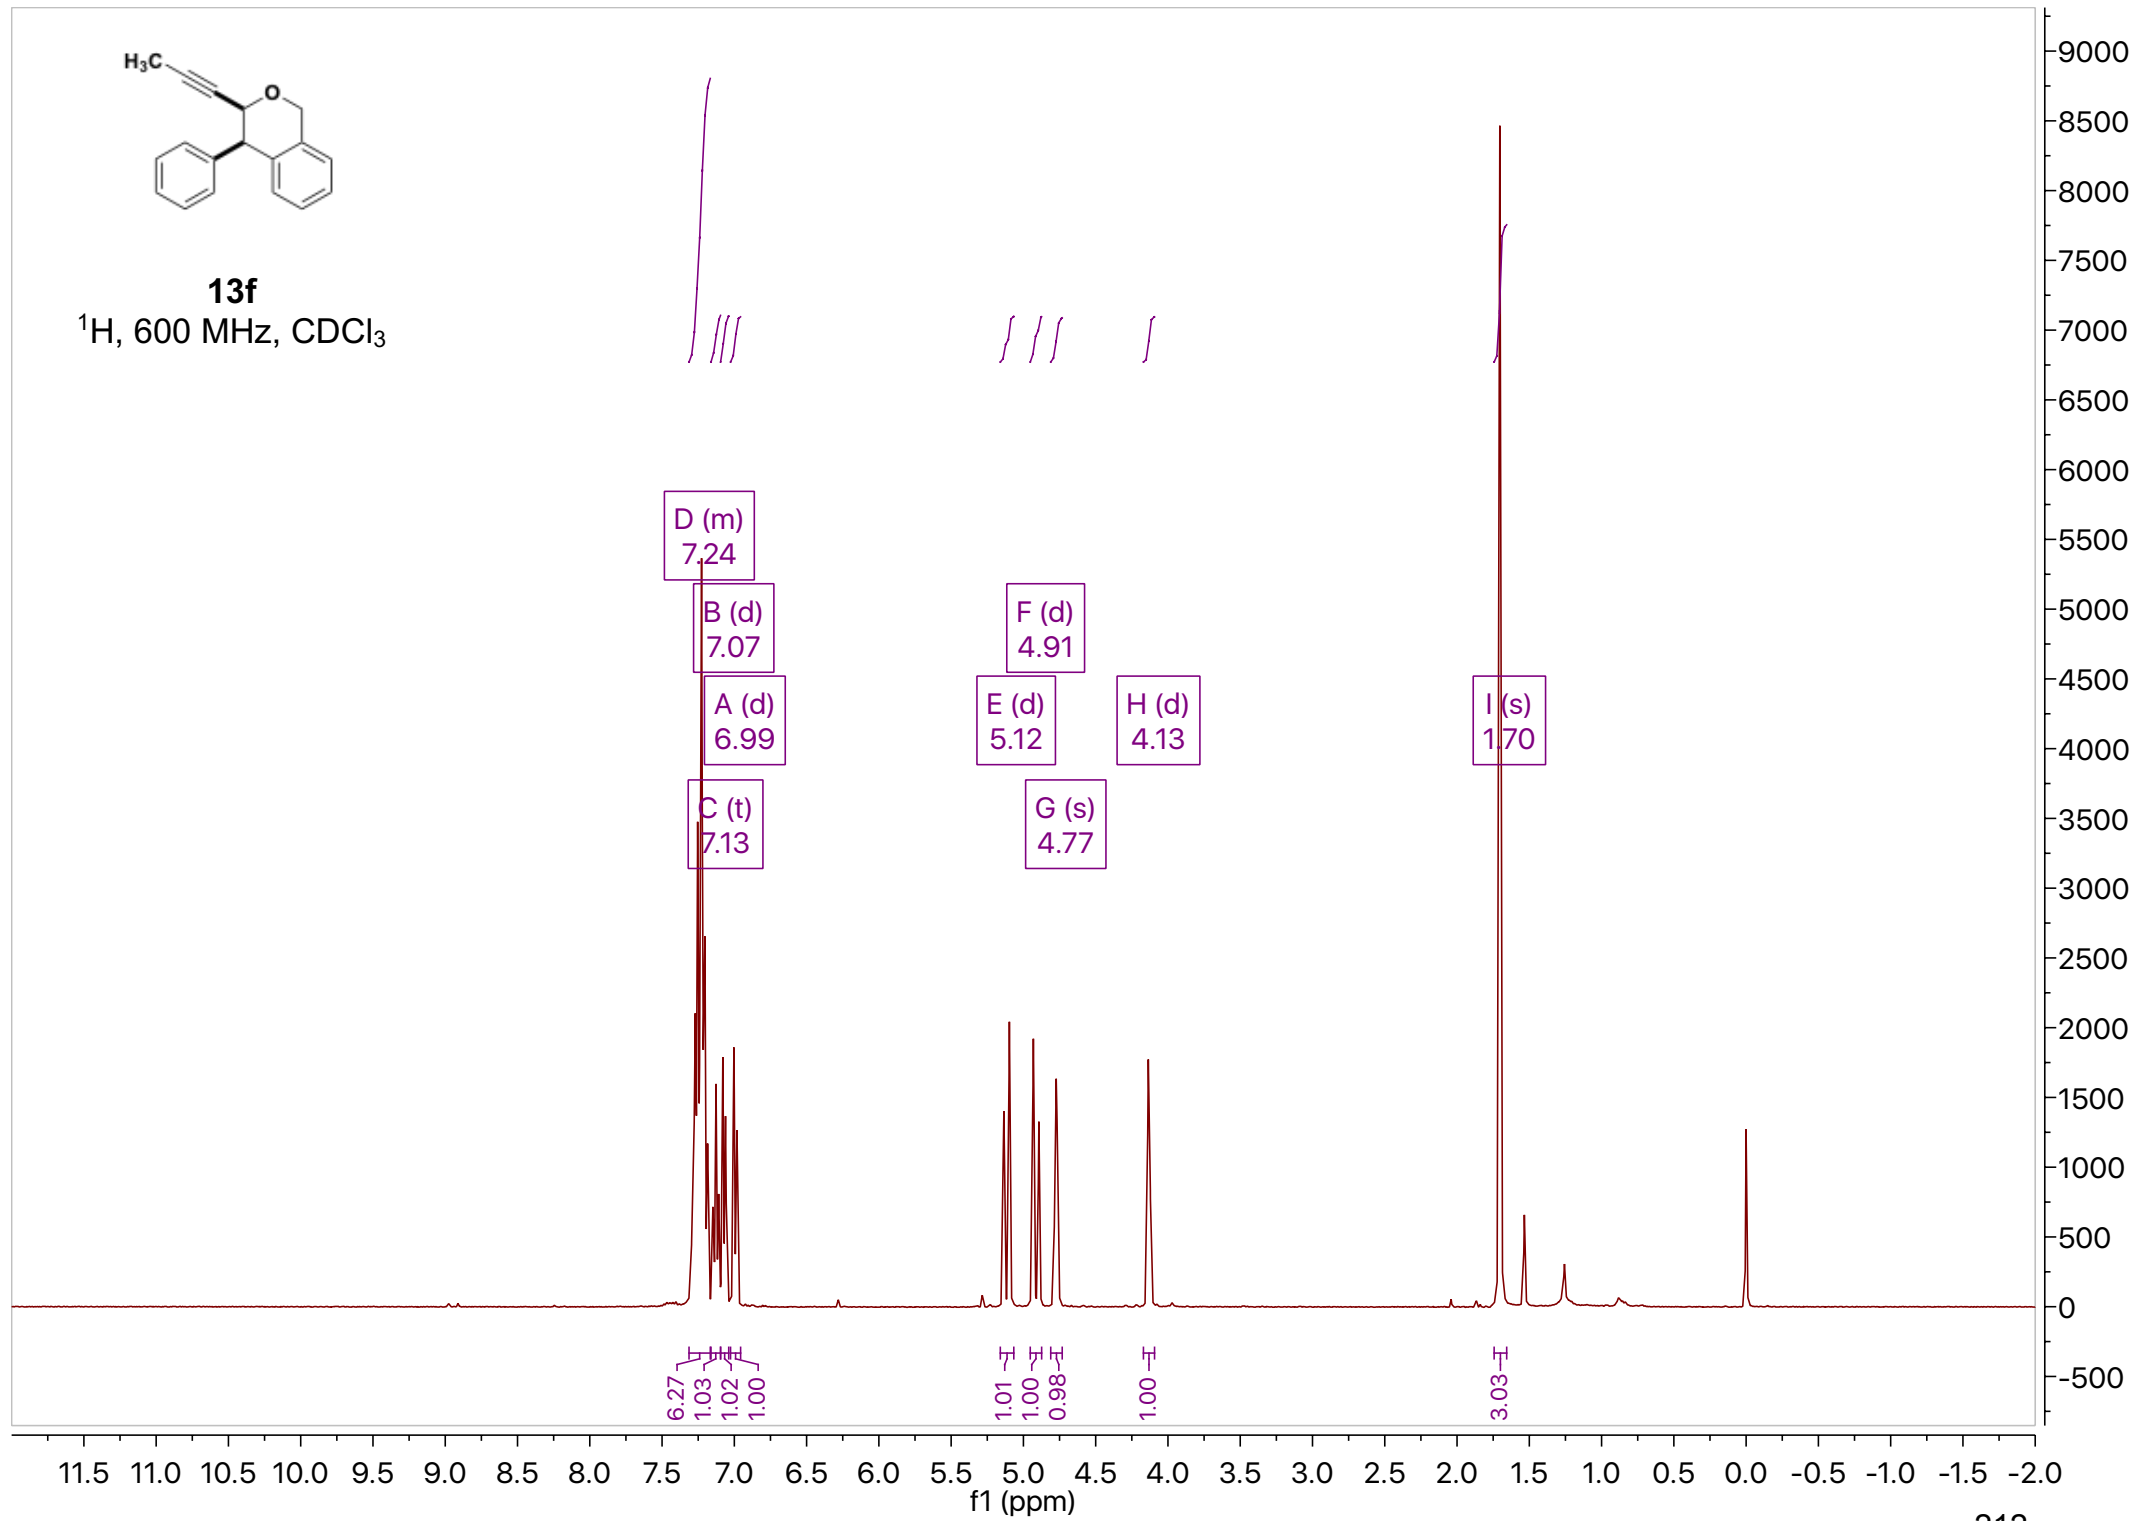

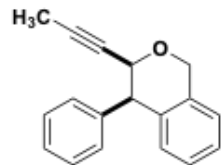

**13f**

$^{13}\text{C}$ , 150 MHz,  $\text{CDCl}_3$

140.91  
135.84  
133.95  
130.36  
129.93  
127.82  
126.90  
126.87  
126.73  
124.07

85.15

75.93

69.84

67.36

48.57

3.66

210 200 190 180 170 160 150 140 130 120 110 100 90 80 70 60 50 40 30 20 10 0 -10  
f1 (ppm)

213

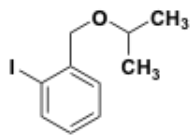

59

$^1\text{H}$ , 400 MHz,  $\text{CDCl}_3$

||| |

| |

|

B (d)  
7.46  
A (d)  
7.80  
D (t)  
6.96  
C (t)  
7.34

E (s)  
4.47  
F (hept)  
3.75

G (d)  
1.26

0.99  
1.00  
1.02  
1.01

2.05  
0.99

6.22

11.5 11.0 10.5 10.0 9.5 9.0 8.5 8.0 7.5 7.0 6.5 6.0 5.5 5.0 4.5 4.0 3.5 3.0 2.5 2.0 1.5 1.0 0.5 0.0 -0.5 -1.0 -1.5 -2.0  
f1 (ppm)

35000  
30000  
25000  
20000  
15000  
10000  
5000  
0

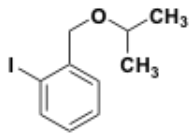

**59**

$^{13}\text{C}$ , 100 MHz,  $\text{CDCl}_3$

141.28  
139.10

129.01  
128.80  
128.25

97.82

74.15  
71.84

22.27

210 200 190 180 170 160 150 140 130 120 110 100 90 80 70 60 50 40 30 20 10 0 -10

215

45000  
40000  
35000  
30000  
25000  
20000  
15000  
10000  
5000  
0

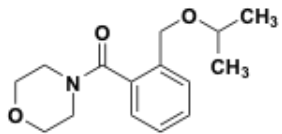

**60**

$^1\text{H}$ , 400 MHz,  $\text{CDCl}_3$

||||

ss | | | |

D (d)  
7.18

B (t)  
7.36

A (d)  
7.45

C (t)  
7.30

G (s)  
4.42

F (s)  
4.61

I (s)  
3.59

H (s)  
3.26

J (m)  
3.71

E (d)  
1.21

1.00  
1.03  
1.03  
0.98

1.01  
0.99

5.12  
2.12  
2.03

5.86

11.5 11.0 10.5 10.0 9.5 9.0 8.5 8.0 7.5 7.0 6.5 6.0 5.5 5.0 4.5 4.0 3.5 3.0 2.5 2.0 1.5 1.0 0.5 0.0 -0.5 -1.0 -1.5 -2.0  
f1 (ppm)

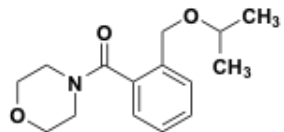

**60**

$^{13}\text{C}$ , 100 MHz,  $\text{CDCl}_3$

169.92

136.15  
135.14  
129.35  
129.18  
127.66  
126.02

71.88  
67.88  
66.81

47.71  
42.01

22.18

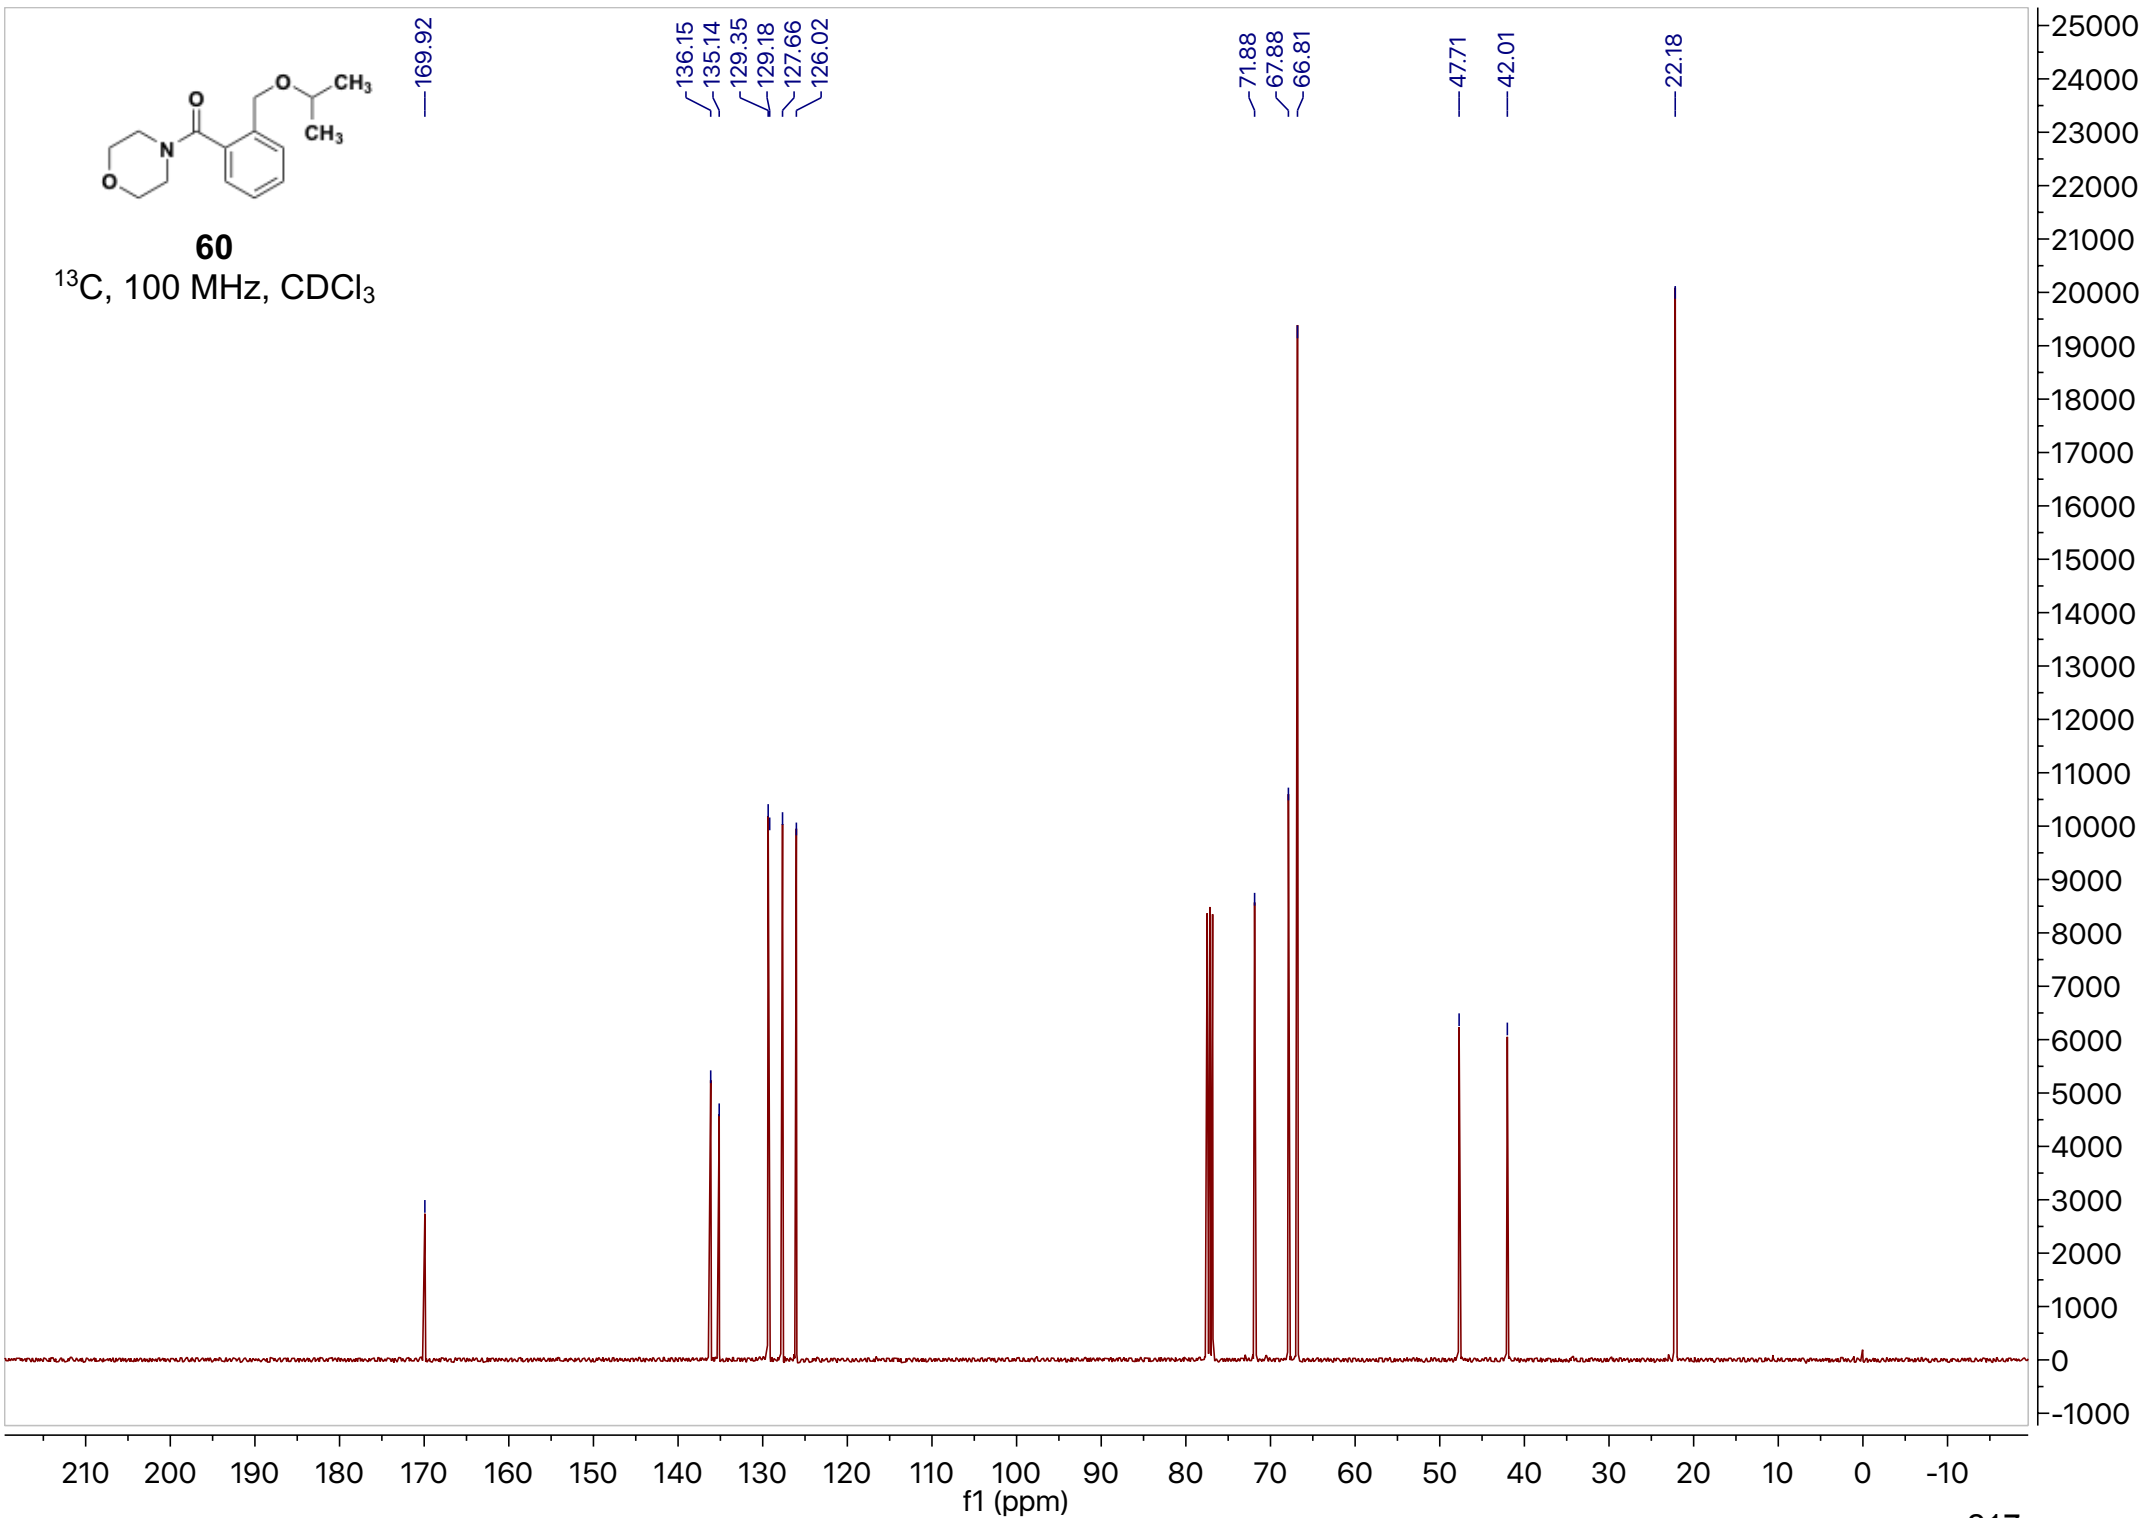

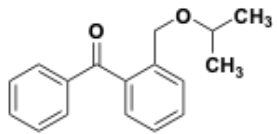

**61**

<sup>1</sup>H, 600 MHz, CDCl<sub>3</sub>

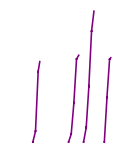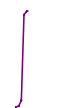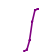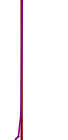

F (d)  
7.33

D (m)  
7.57

C (d)  
7.82

E (m)  
7.46

B (s)  
4.58

A (hept)  
3.50

G (d)  
1.00

1.68  
1.81  
2.73  
1.76

2.00

0.88

5.91

11.5 11.0 10.5 10.0 9.5 9.0 8.5 8.0 7.5 7.0 6.5 6.0 5.5 5.0 4.5 4.0 3.5 3.0 2.5 2.0 1.5 1.0 0.5 0.0 -0.5 -1.0 -1.5 -2.0  
f1 (ppm)



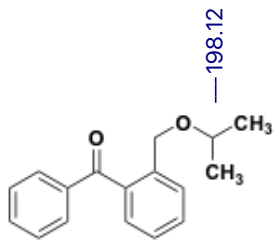

**61**

$^{13}\text{C}$ , 150 MHz,  $\text{CDCl}_3$

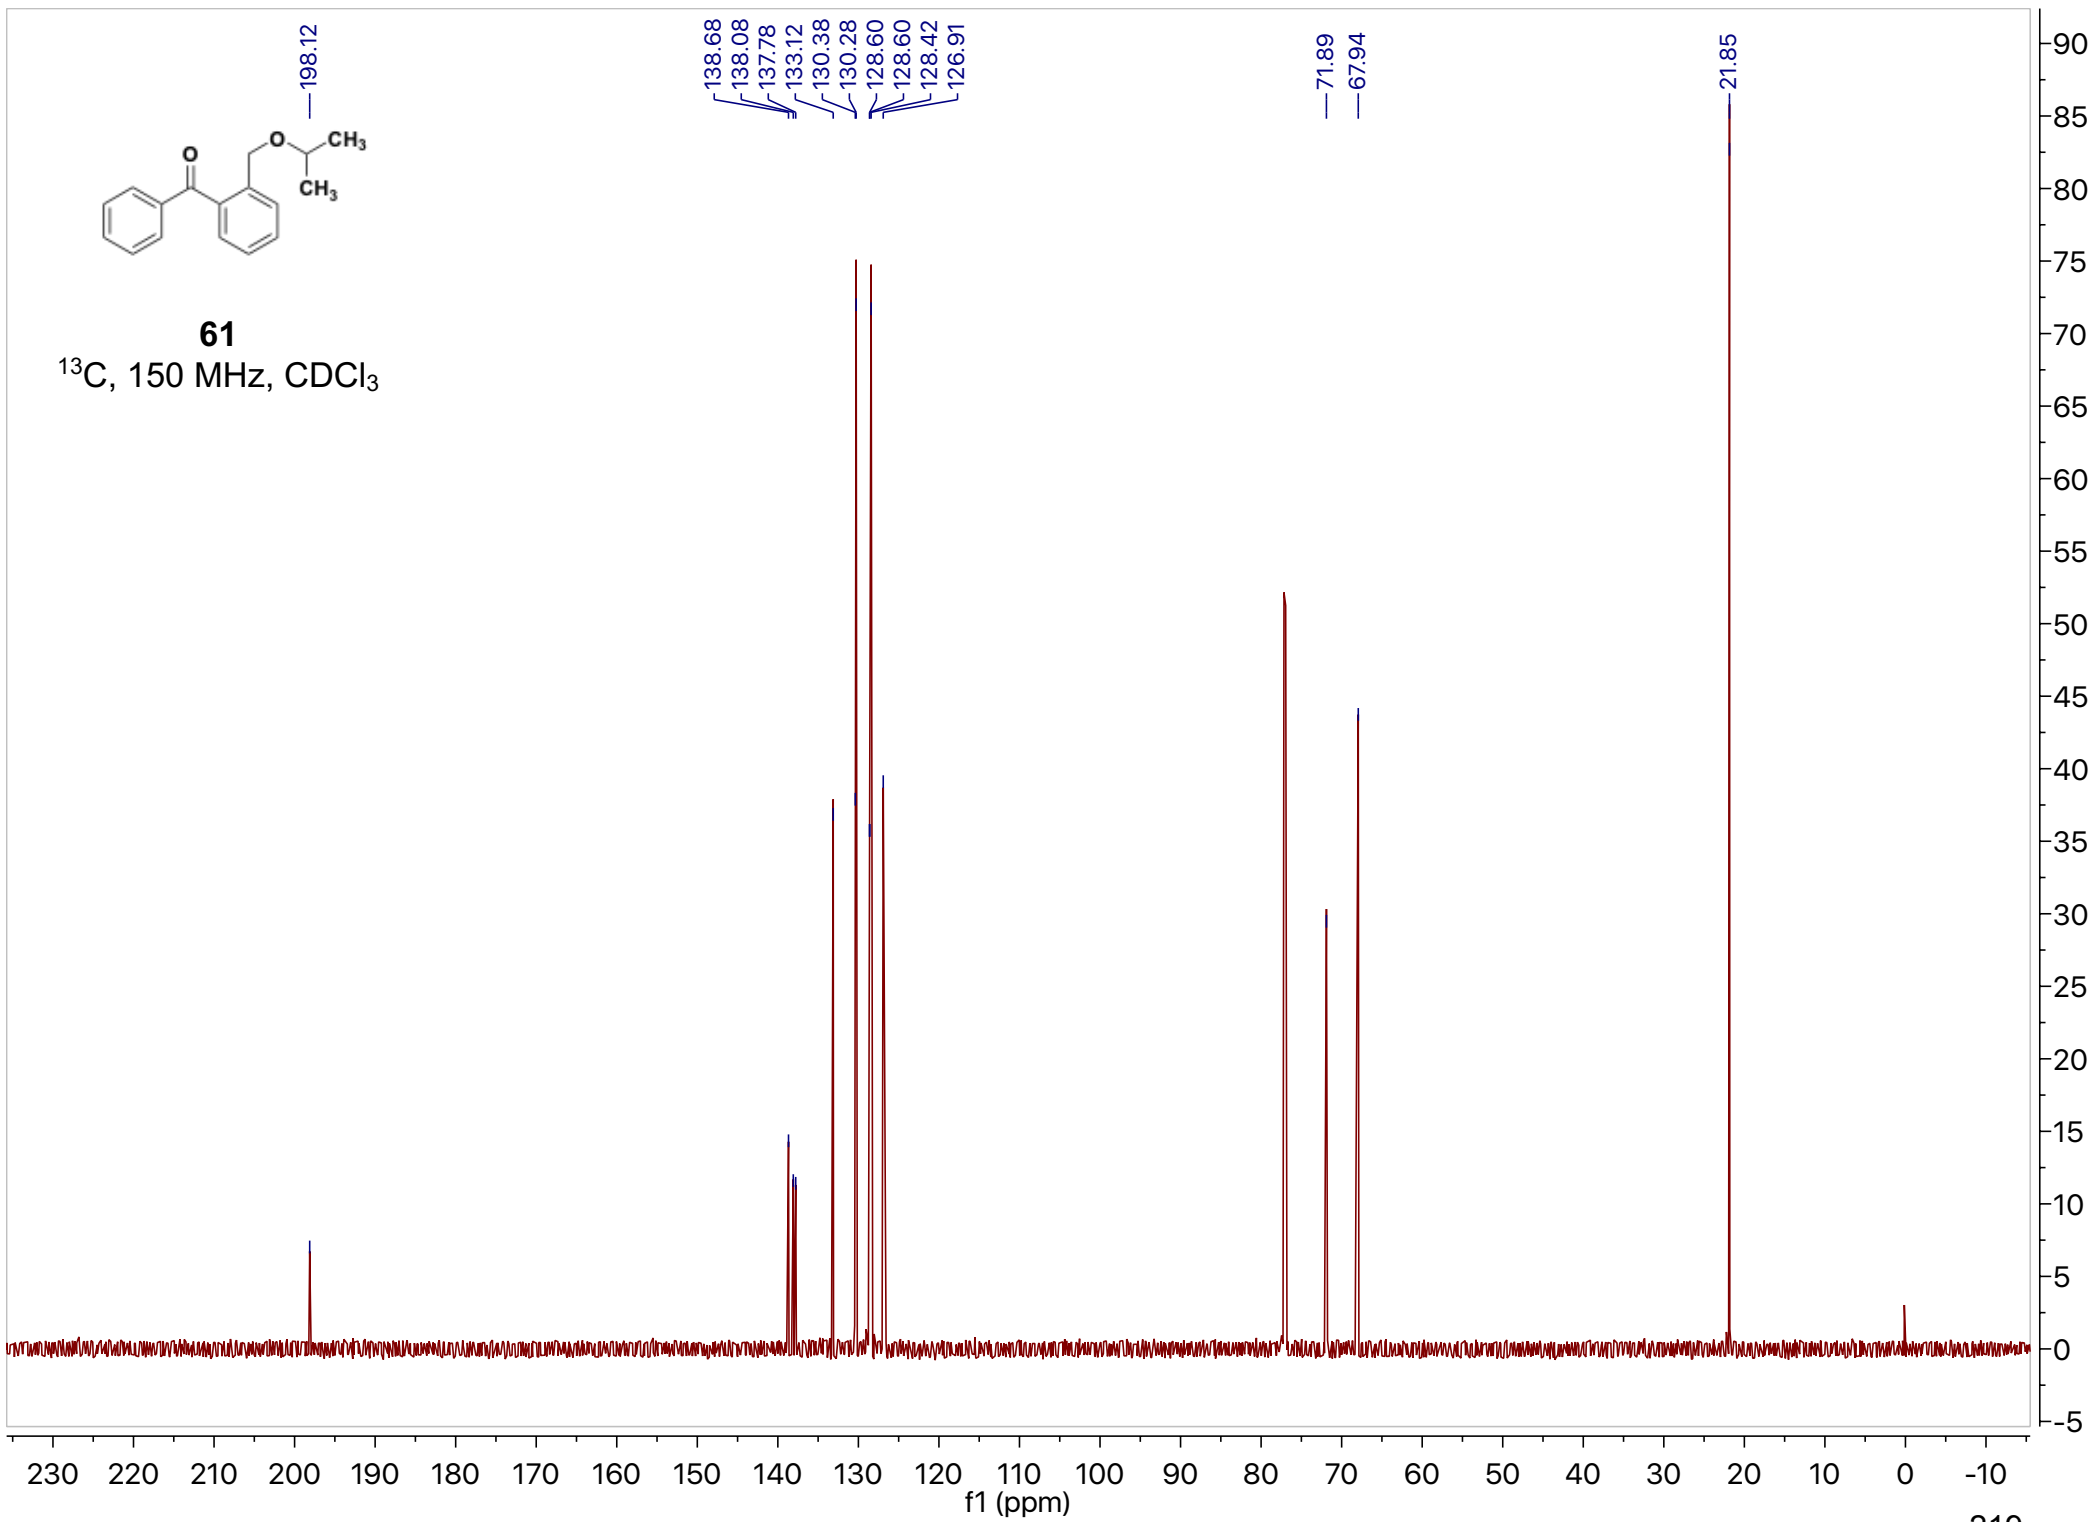

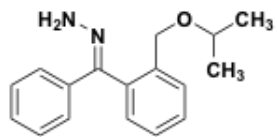

**14a**

<sup>1</sup>H, 400 MHz, CDCl<sub>3</sub>

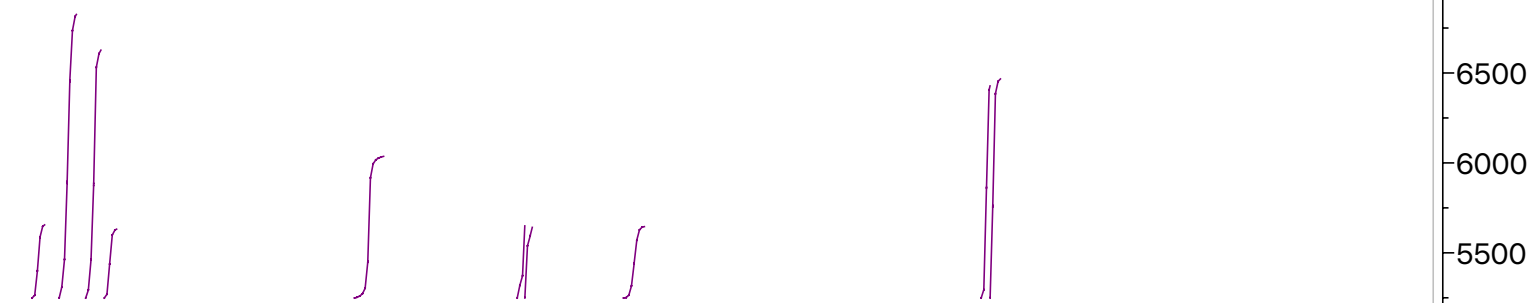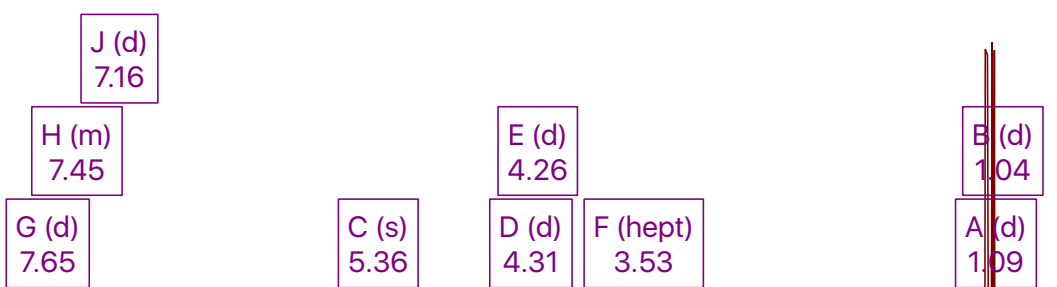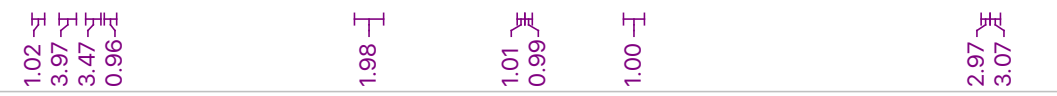

11.5 11.0 10.5 10.0 9.5 9.0 8.5 8.0 7.5 7.0 6.5 6.0 5.5 5.0 4.5 4.0 3.5 3.0 2.5 2.0 1.5 1.0 0.5 0.0 -0.5 -1.0 -1.5 -2.0  
f1 (ppm)

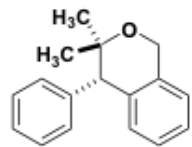

**15a**

$^1\text{H}$ , 600 MHz,  $\text{CD}_2\text{Cl}_2$

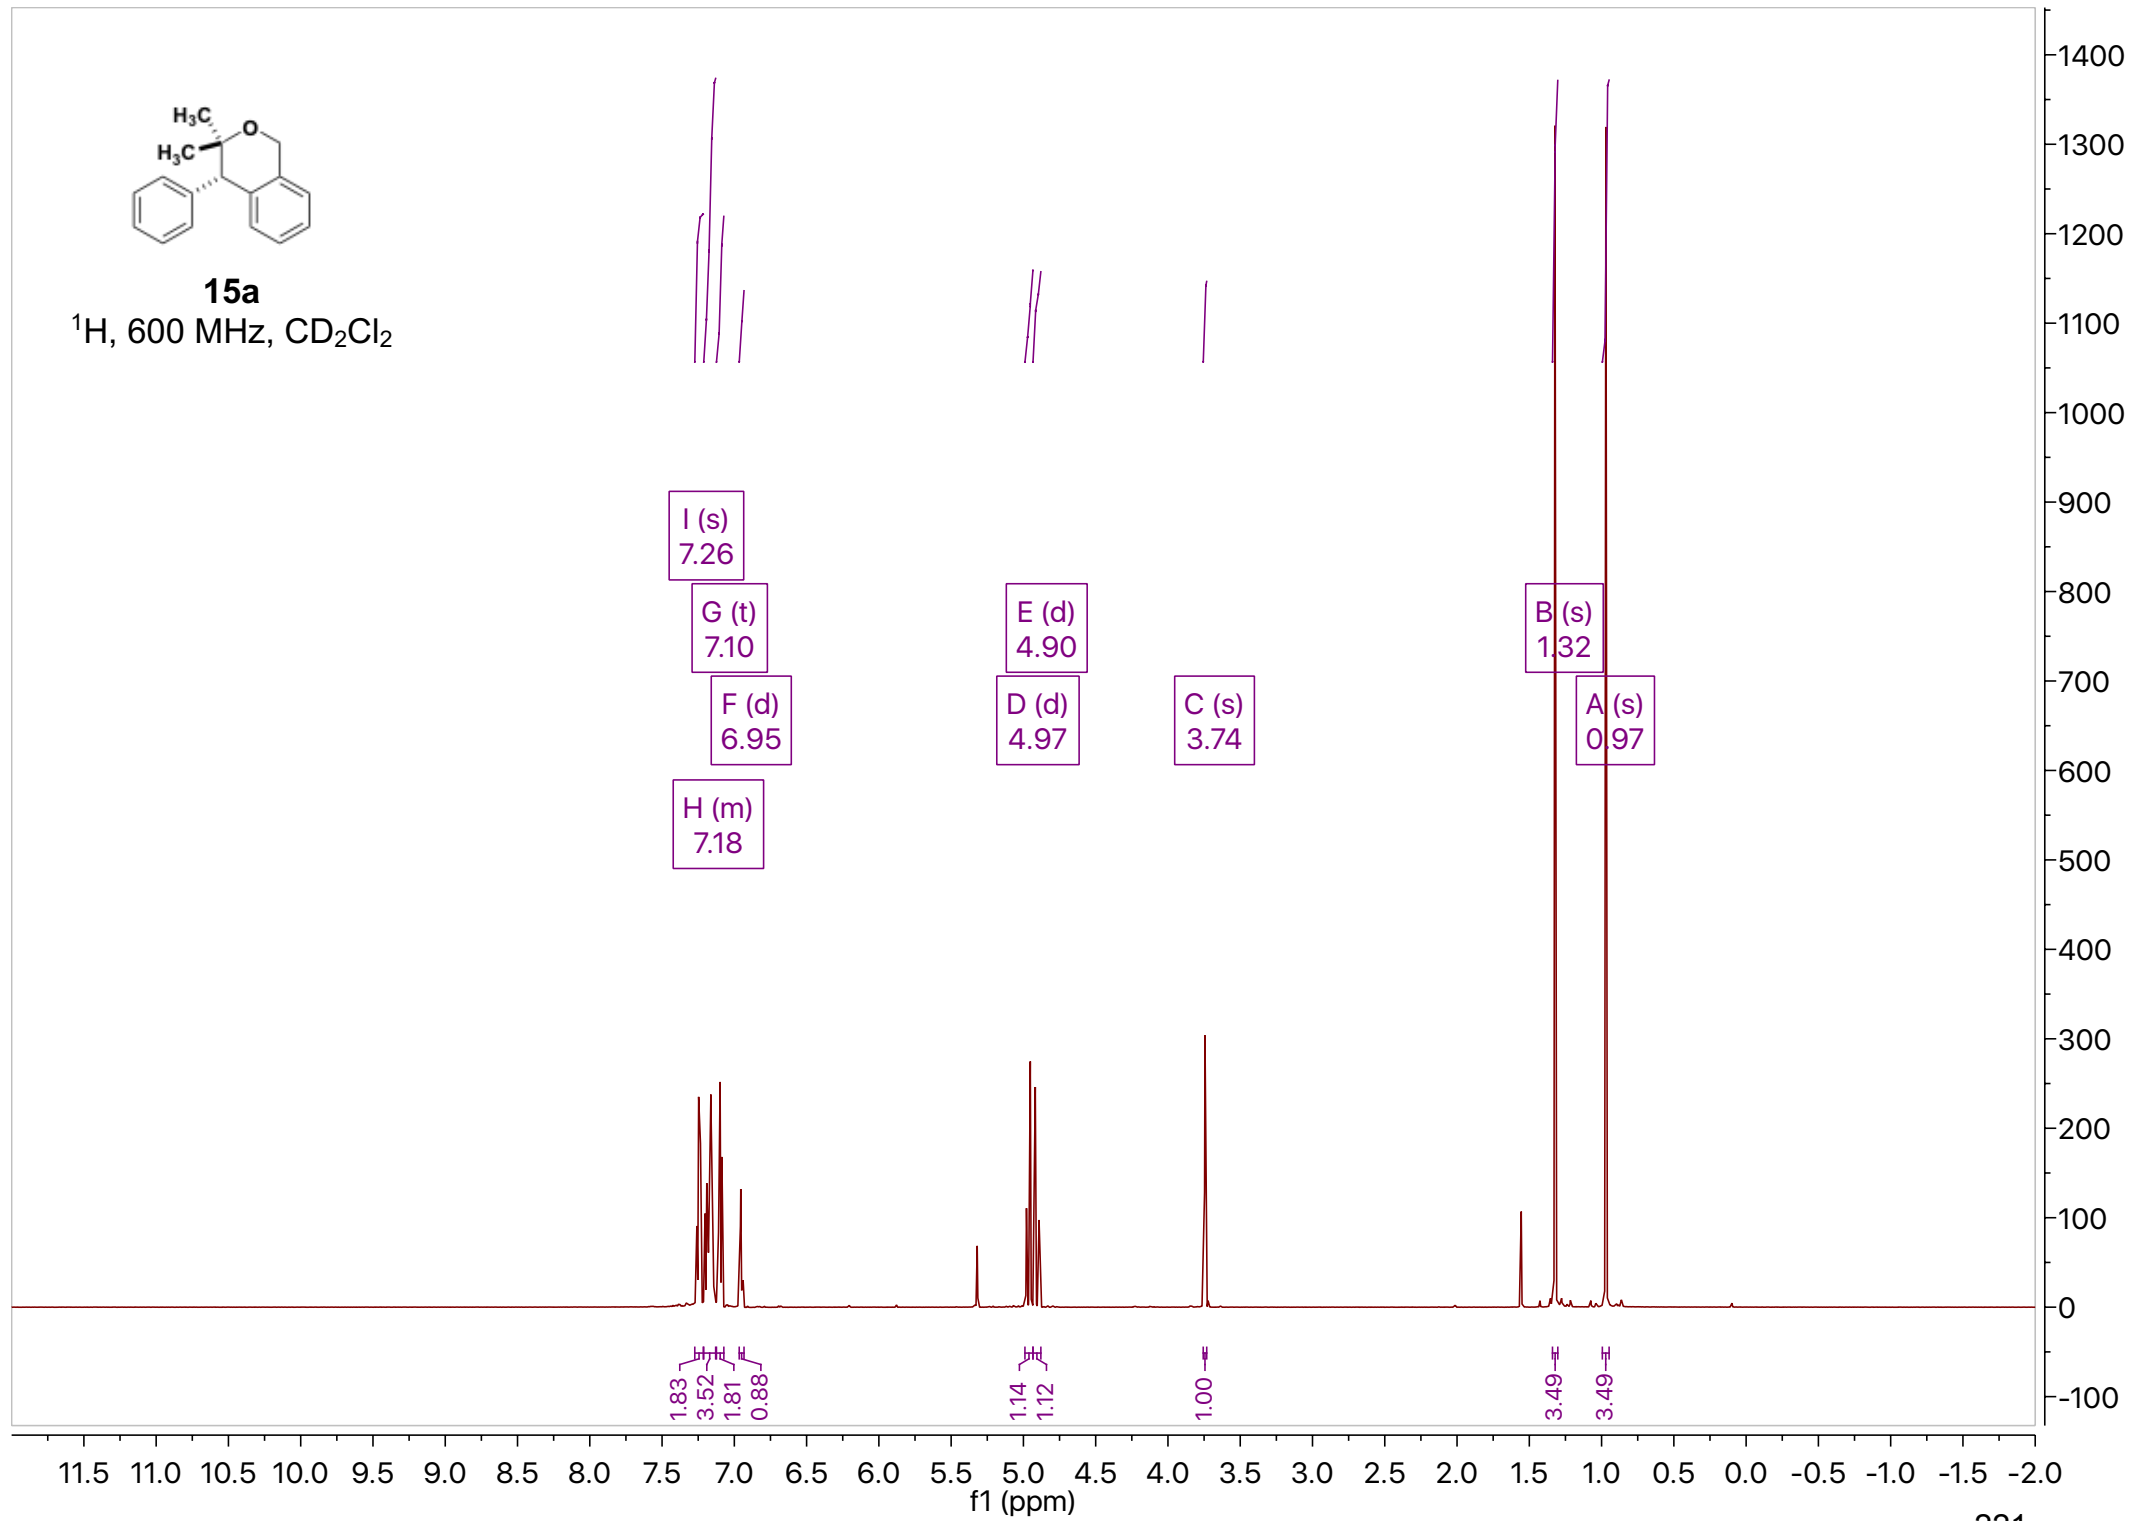

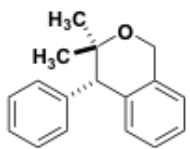

**15a**

$^{13}\text{C}$ , 100 MHz,  $\text{CD}_3\text{CN}$

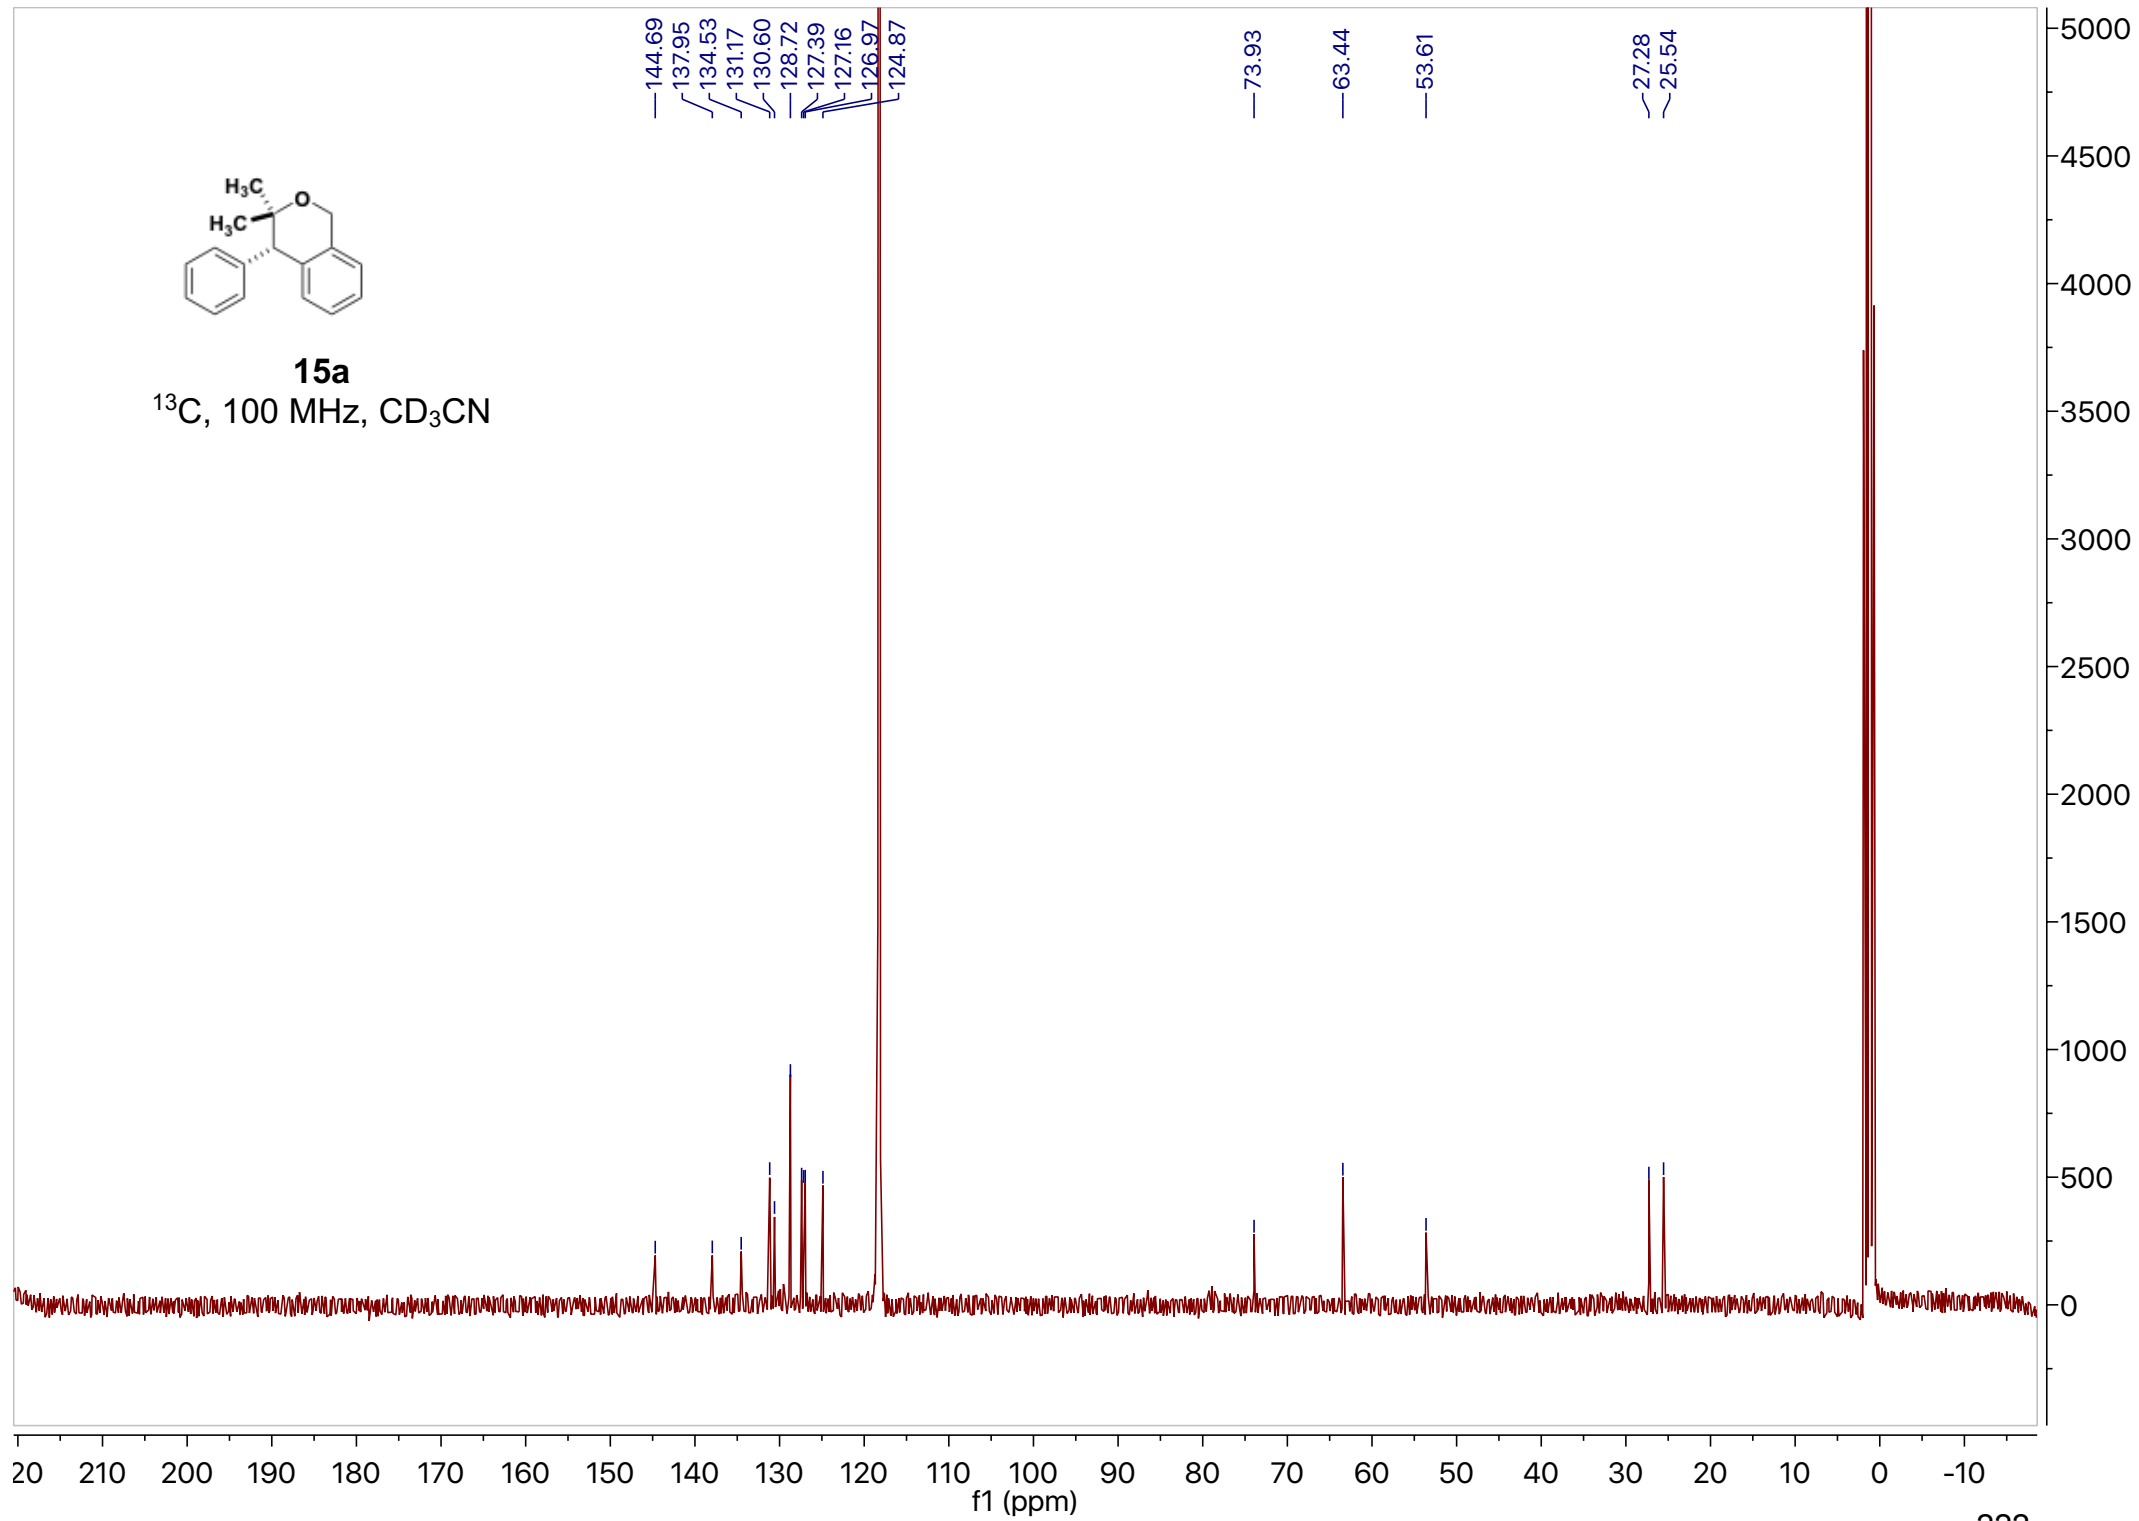

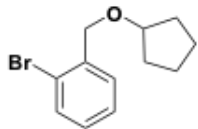

**62**

$^1\text{H}$ , 600 MHz,  $\text{CDCl}_3$

|||

H (d)  
7.49

B (t)  
7.12

A (t)  
7.30

G (d)  
7.51

C (s)  
4.52

D (m)  
4.05

F (m)  
1.55

E (m)  
1.76

0.91  
0.93  
0.95  
0.93

2.00  
0.93

5.67  
1.93

11.5 11.0 10.5 10.0 9.5 9.0 8.5 8.0 7.5 7.0 6.5 6.0 5.5 5.0 4.5 4.0 3.5 3.0 2.5 2.0 1.5 1.0 0.5 0.0 -0.5 -1.0 -1.5 -2.0  
f1 (ppm)

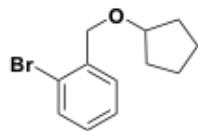

**62**

$^{13}\text{C}$ , 150 MHz,  $\text{CDCl}_3$

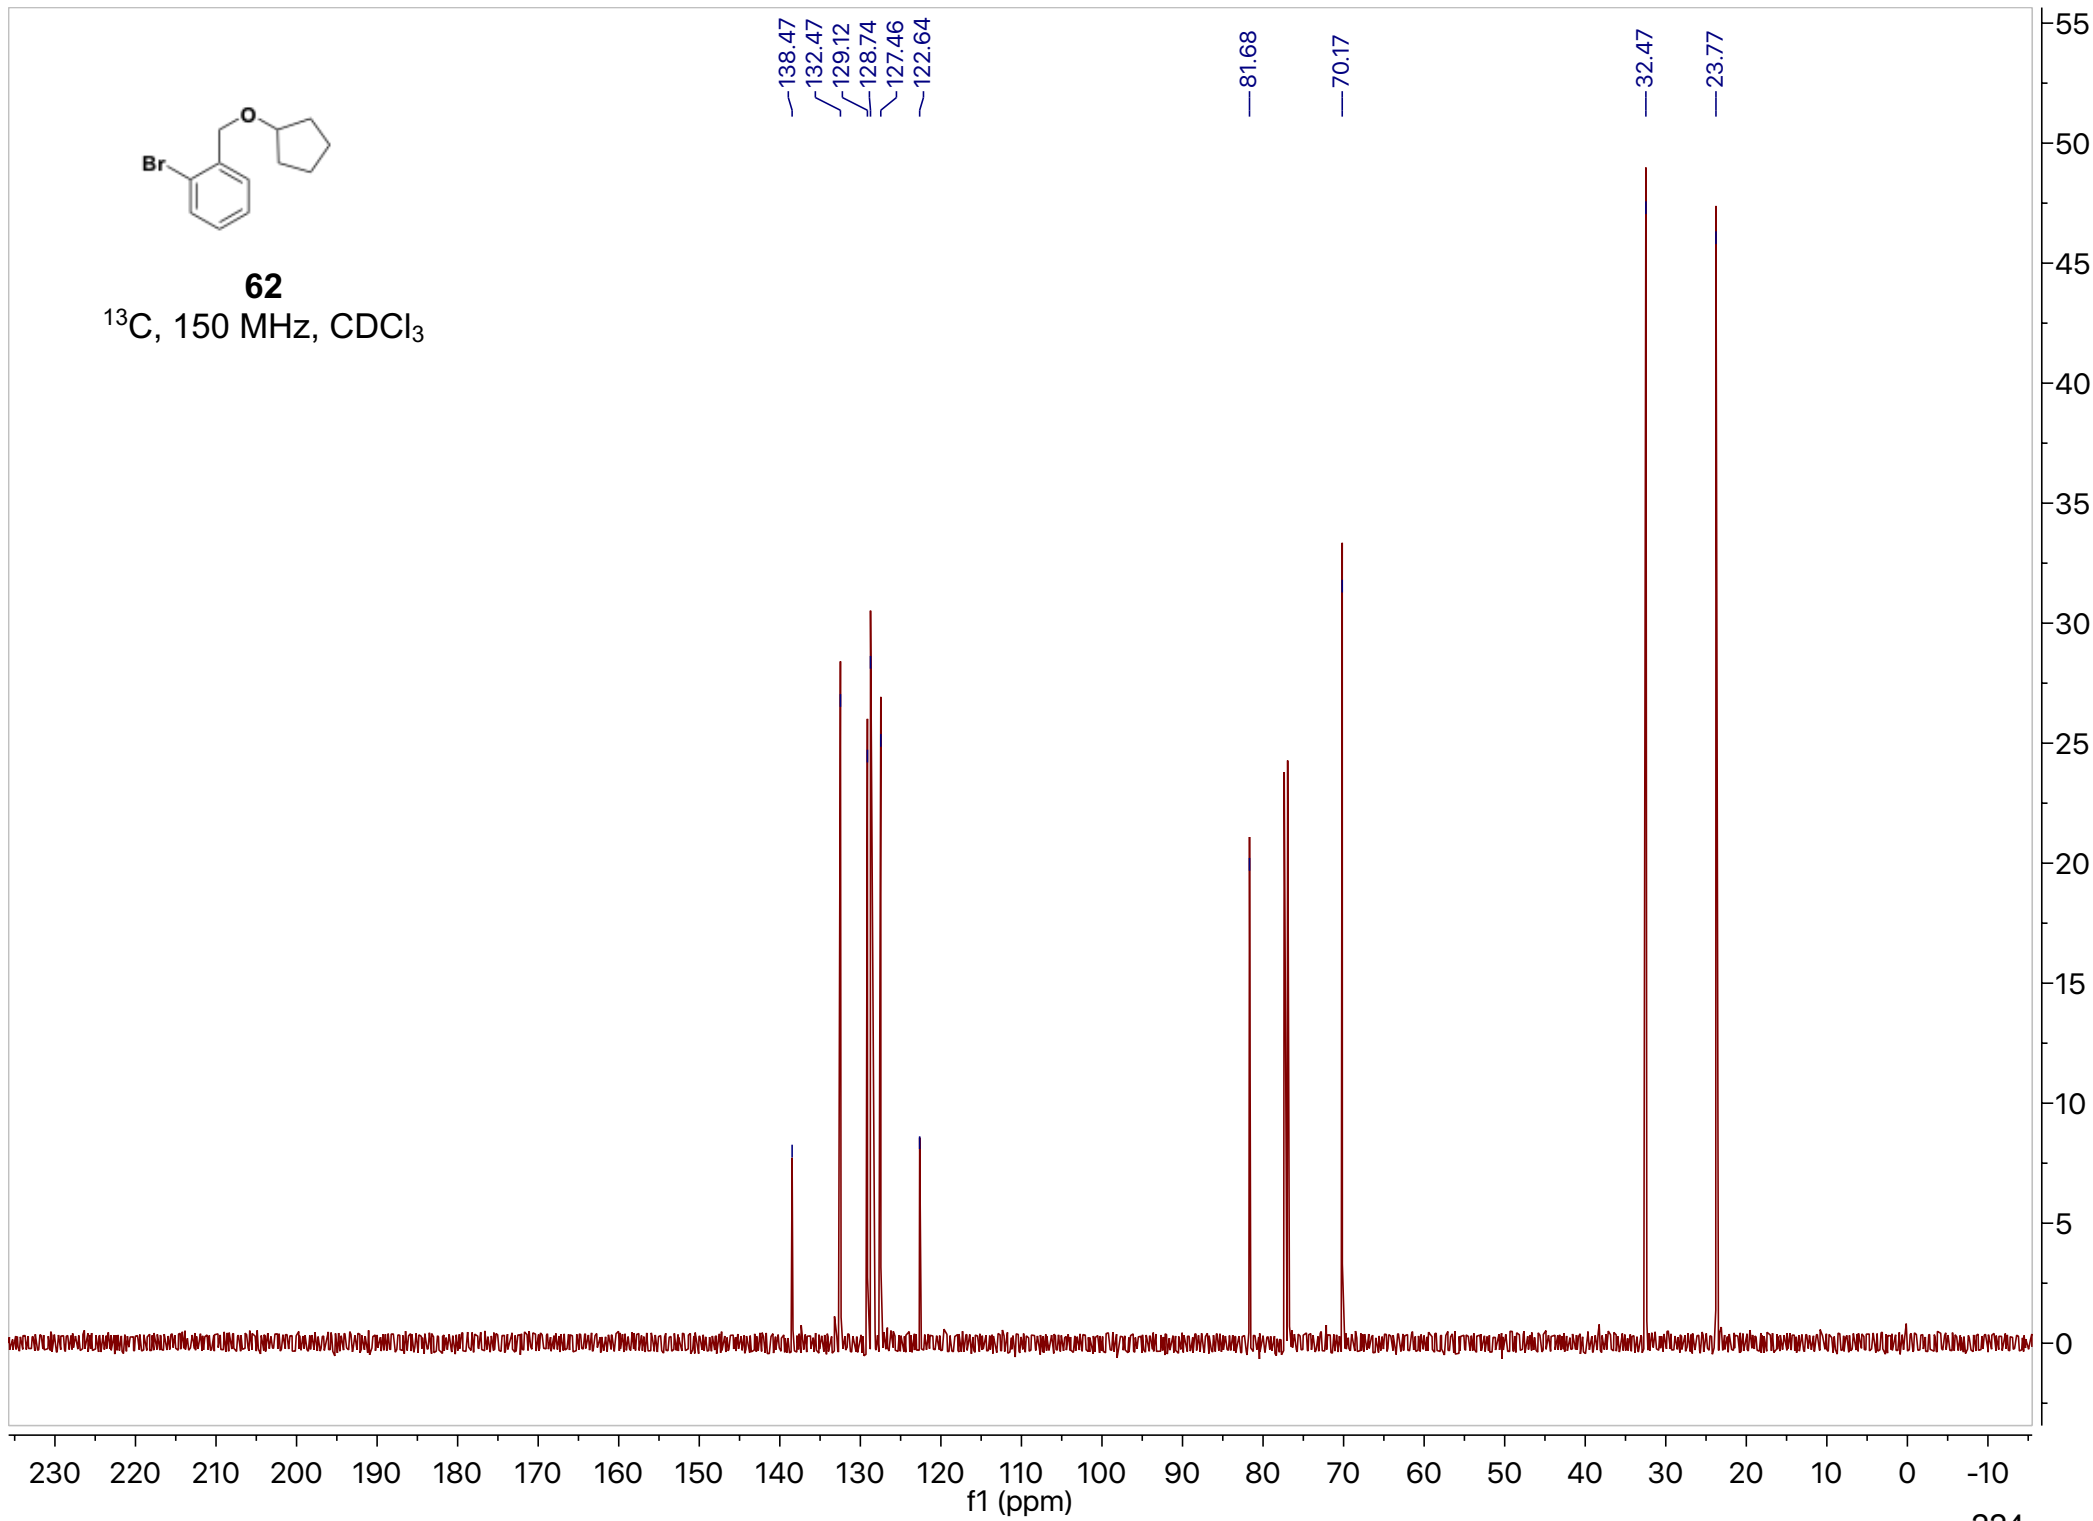

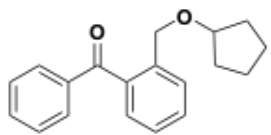

**63**

<sup>1</sup>H, 400 MHz, CDCl<sub>3</sub>

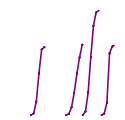

D (d)  
7.33

B (m)  
7.55

A (d)  
7.81

C (m)  
7.45

F (s)  
4.53

E (m)  
3.80

G (m)  
1.48

1.96  
2.03  
3.01  
2.00

2.03

0.66

8.18

11.5 11.0 10.5 10.0 9.5 9.0 8.5 8.0 7.5 7.0 6.5 6.0 5.5 5.0 4.5 4.0 3.5 3.0 2.5 2.0 1.5 1.0 0.5 0.0 -0.5 -1.0 -1.5 -2.0  
f1 (ppm)

8500  
8000  
7500  
7000  
6500  
6000  
5500  
5000  
4500  
4000  
3500  
3000  
2500  
2000  
1500  
1000  
500  
0  
-500

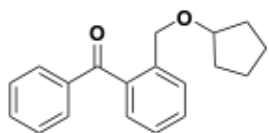

**63**

$^{13}\text{C}$ , 150 MHz,  $\text{CDCl}_3$

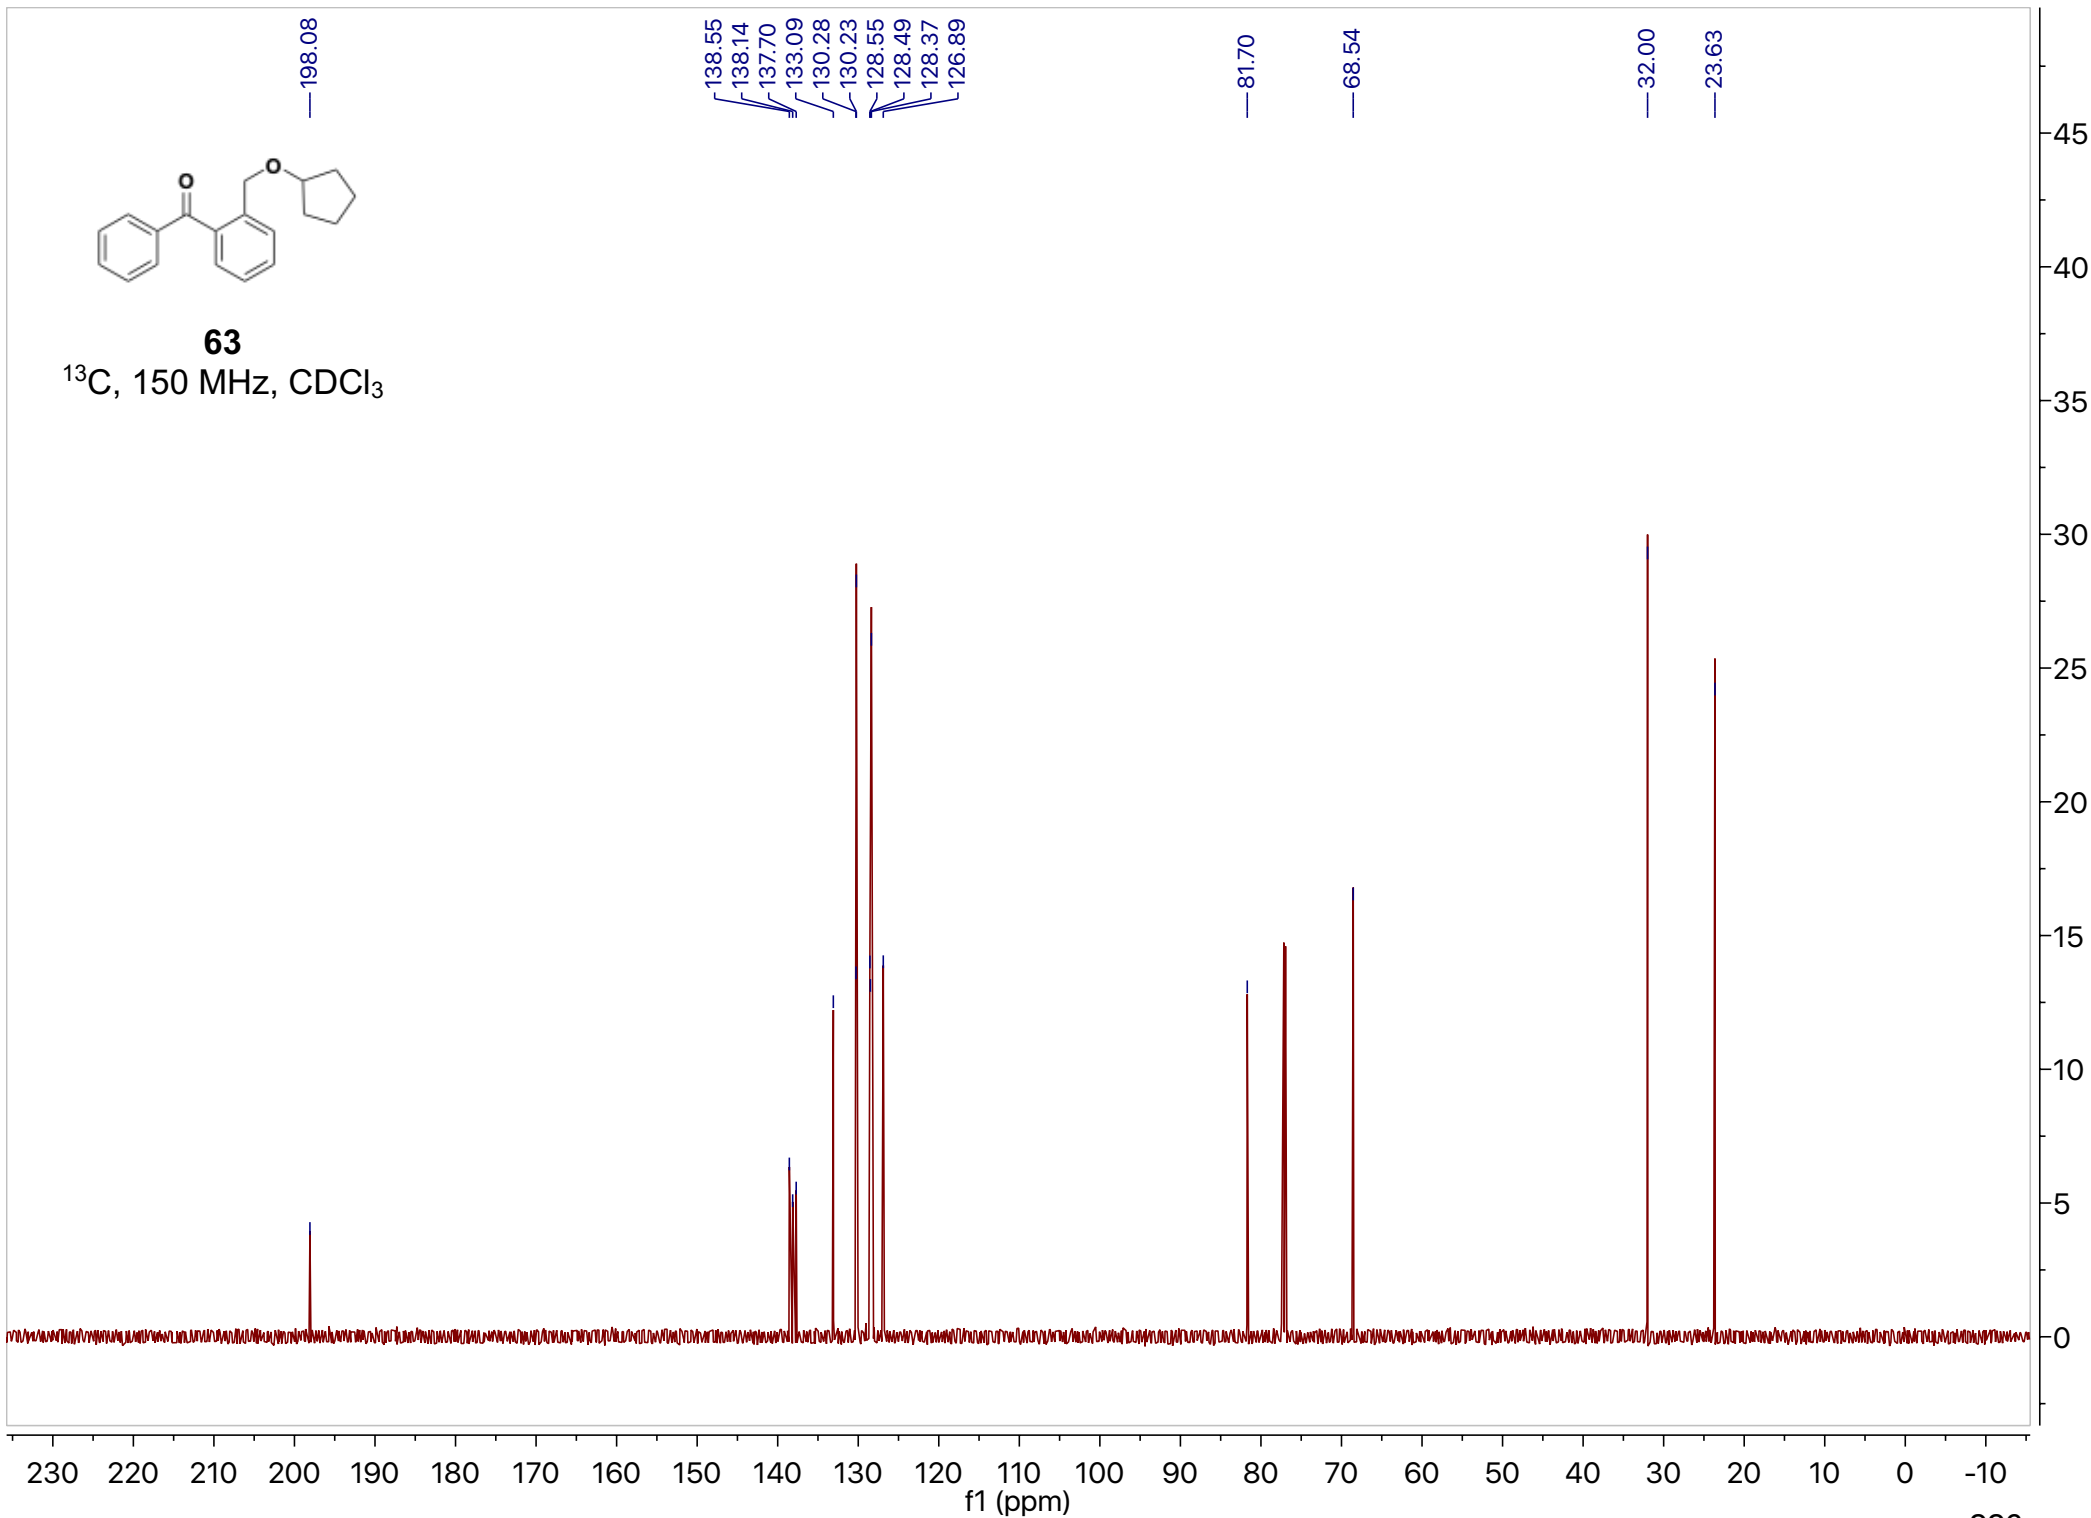



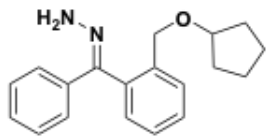

**14b**

<sup>1</sup>H, 600 MHz, CDCl<sub>3</sub>

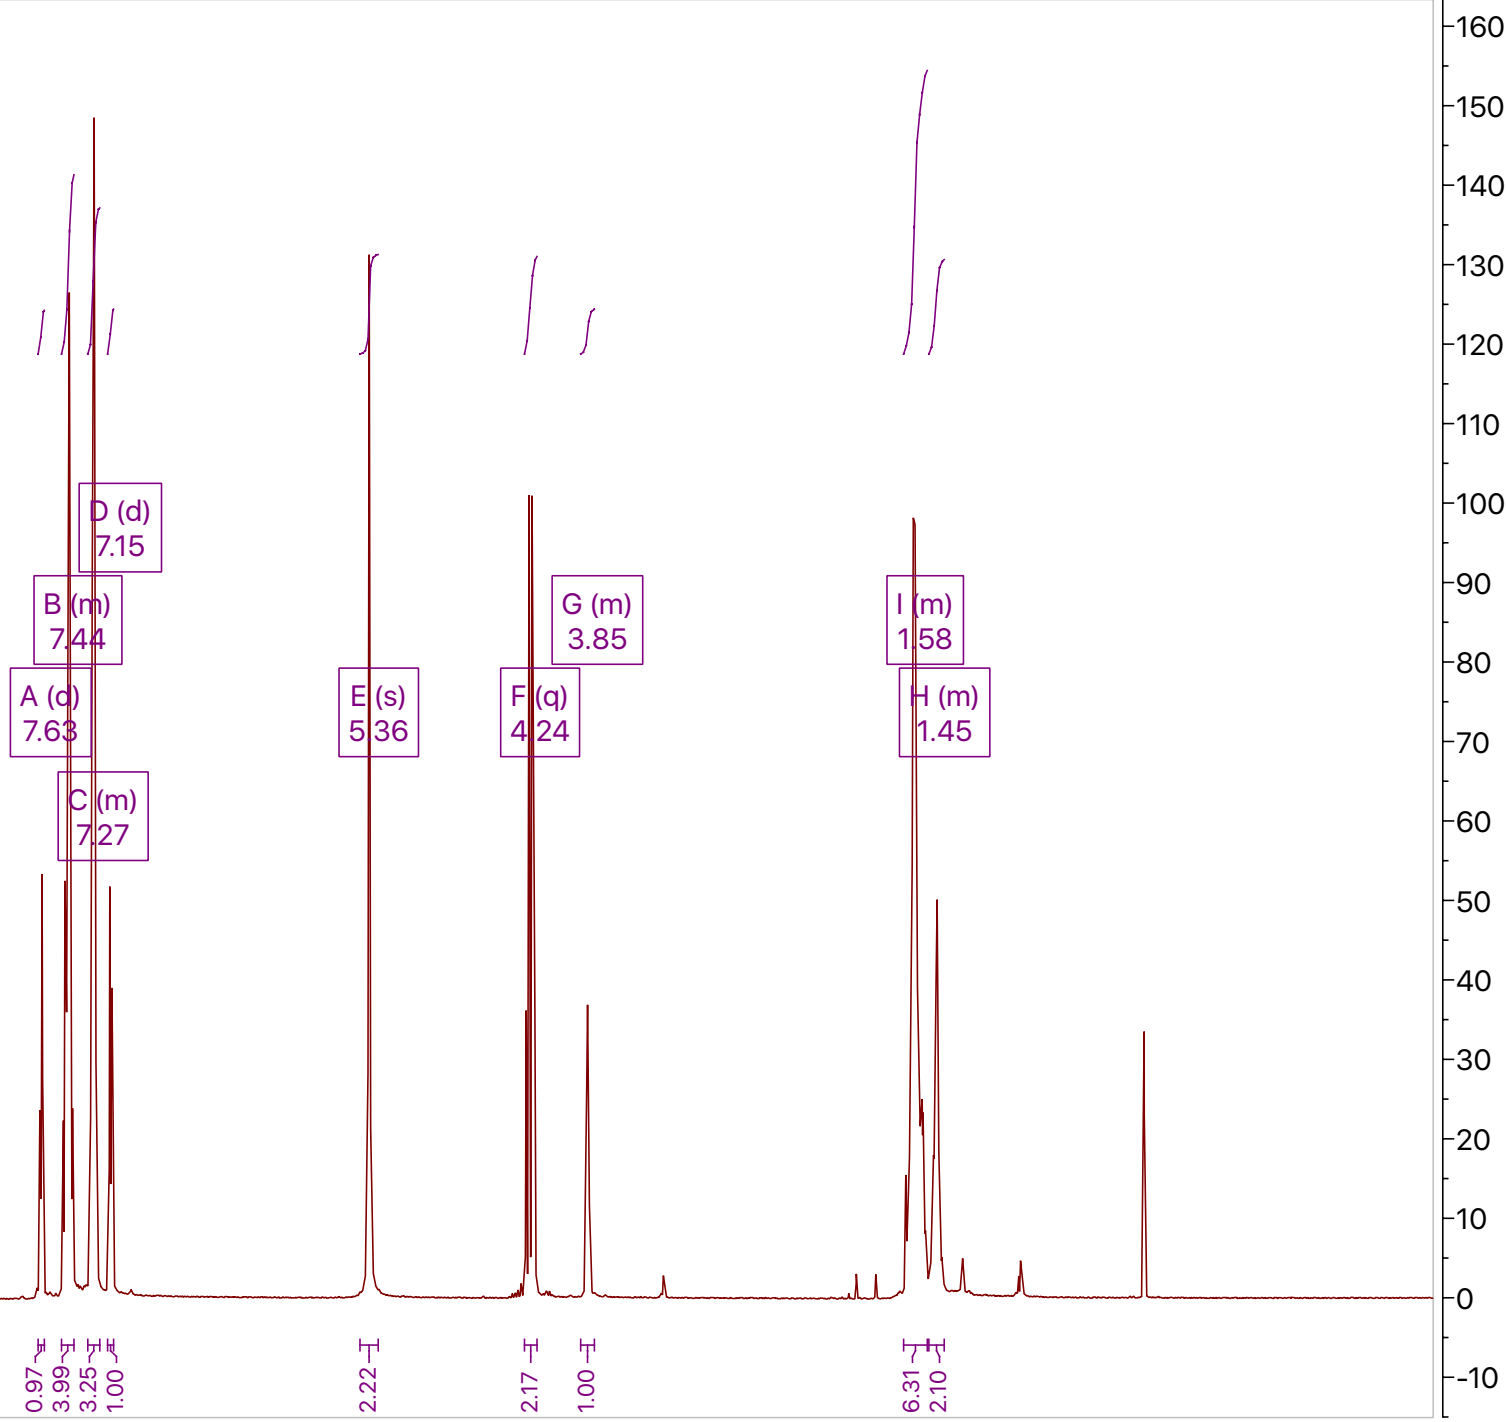

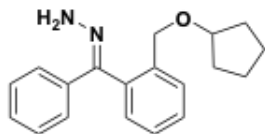

**14b**

$^{13}\text{C}$ , 150 MHz,  $\text{CDCl}_3$

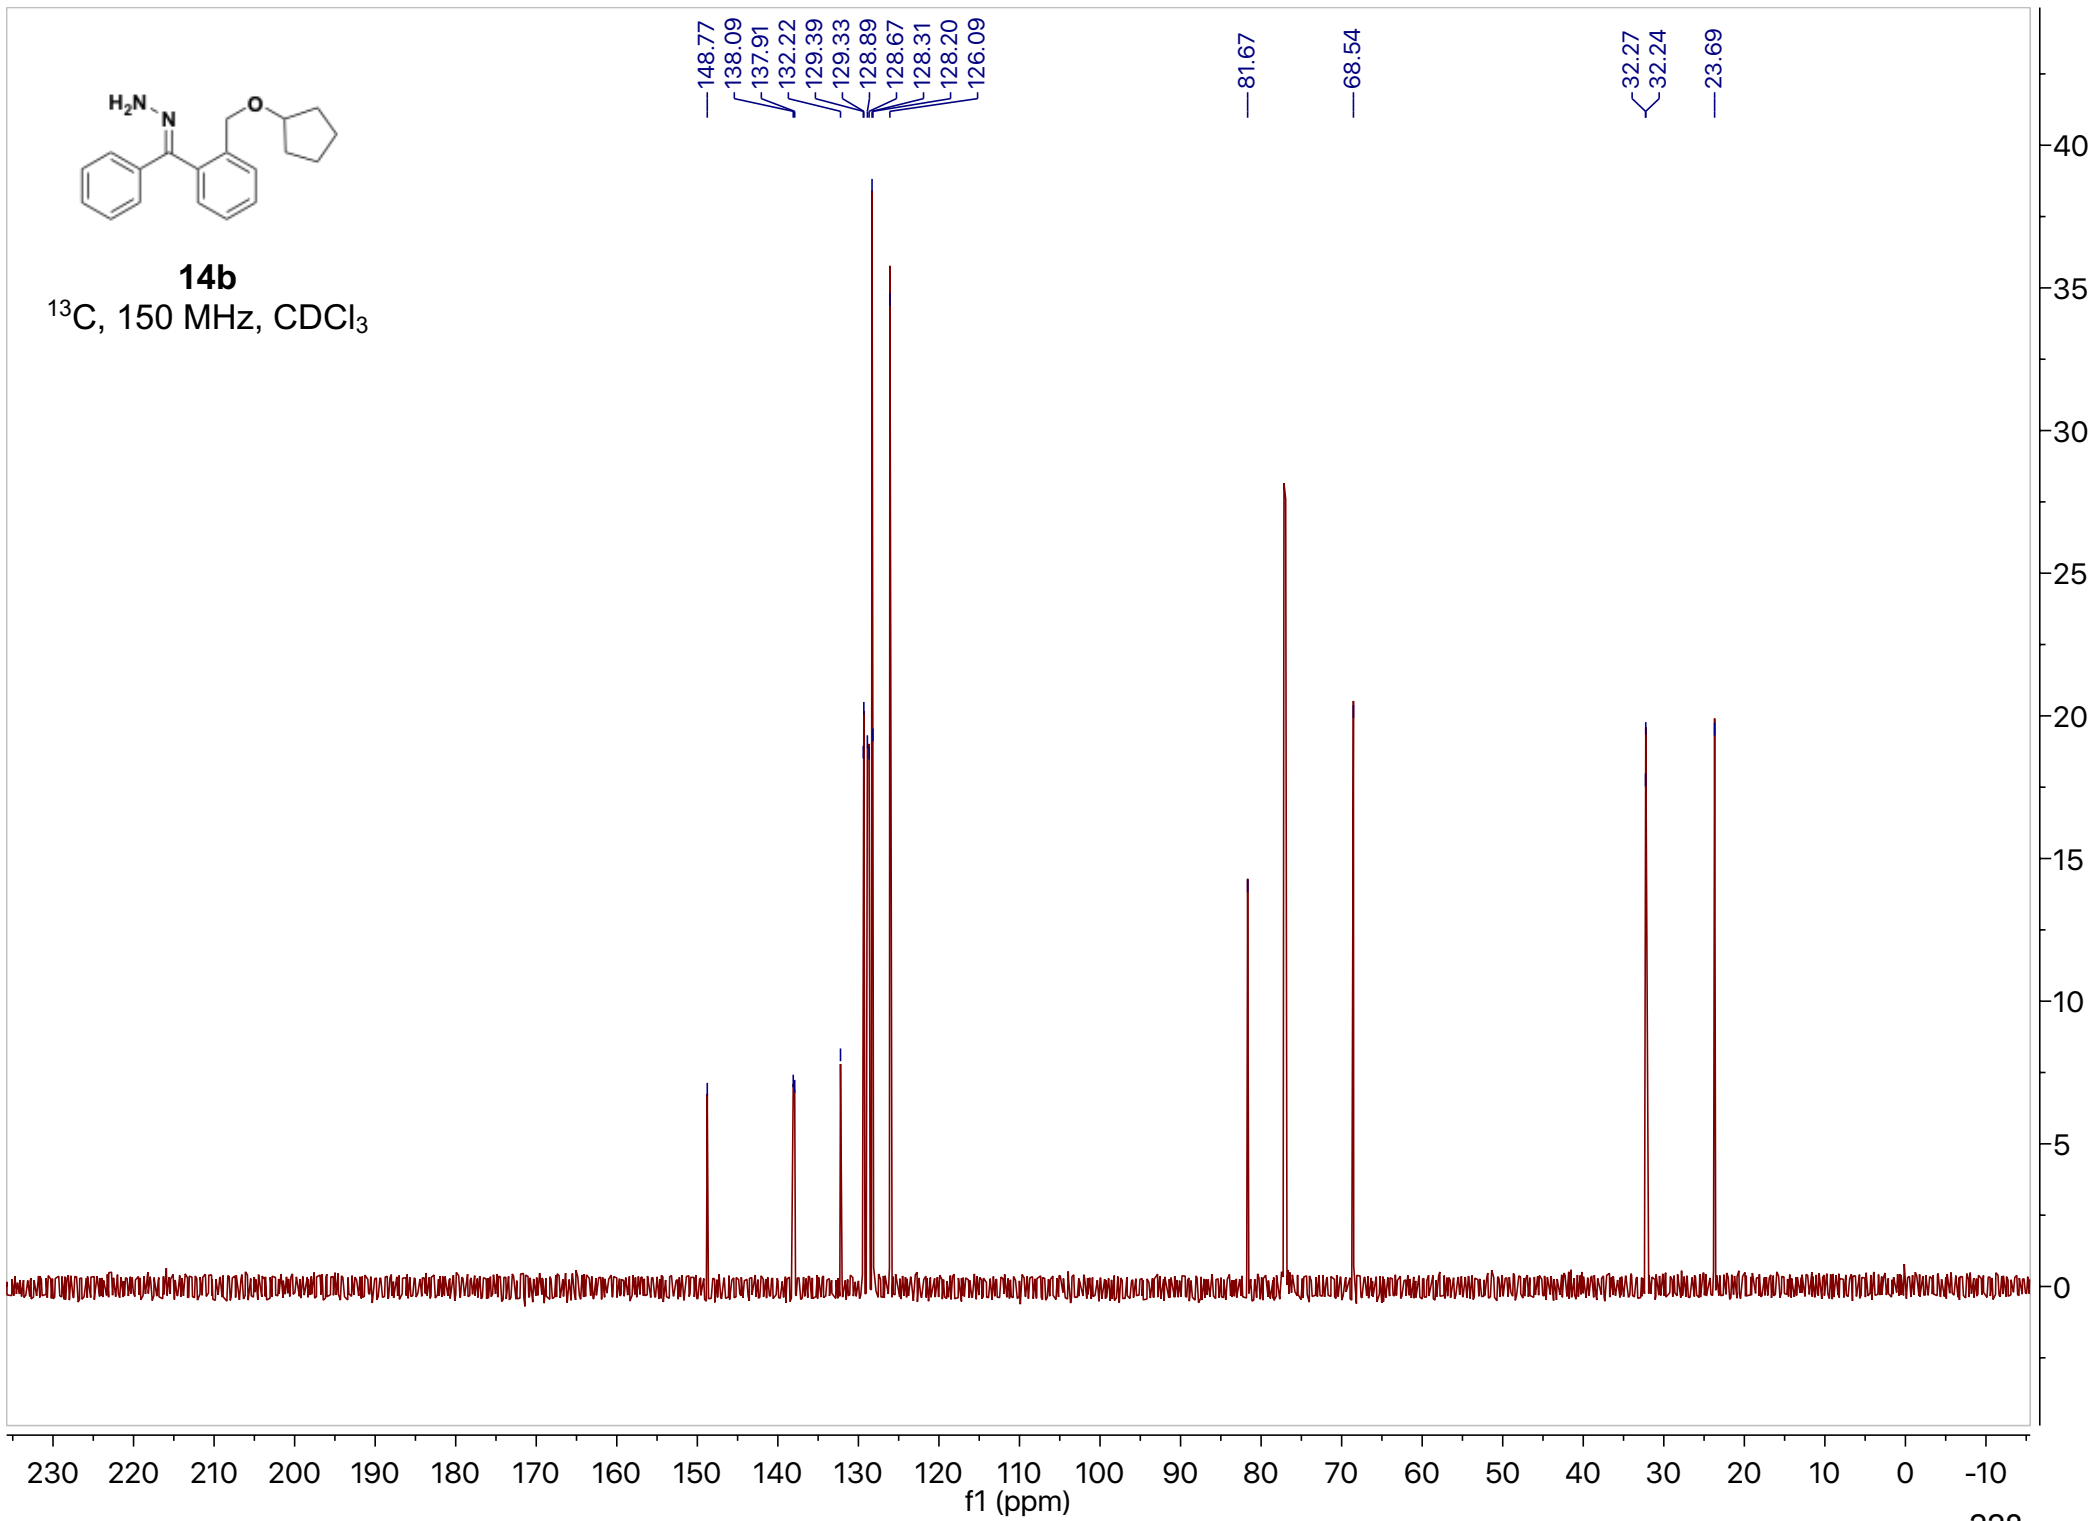

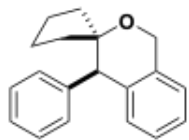

**15b**

$^1\text{H}$ , 400 MHz,  $\text{CDCl}_3$

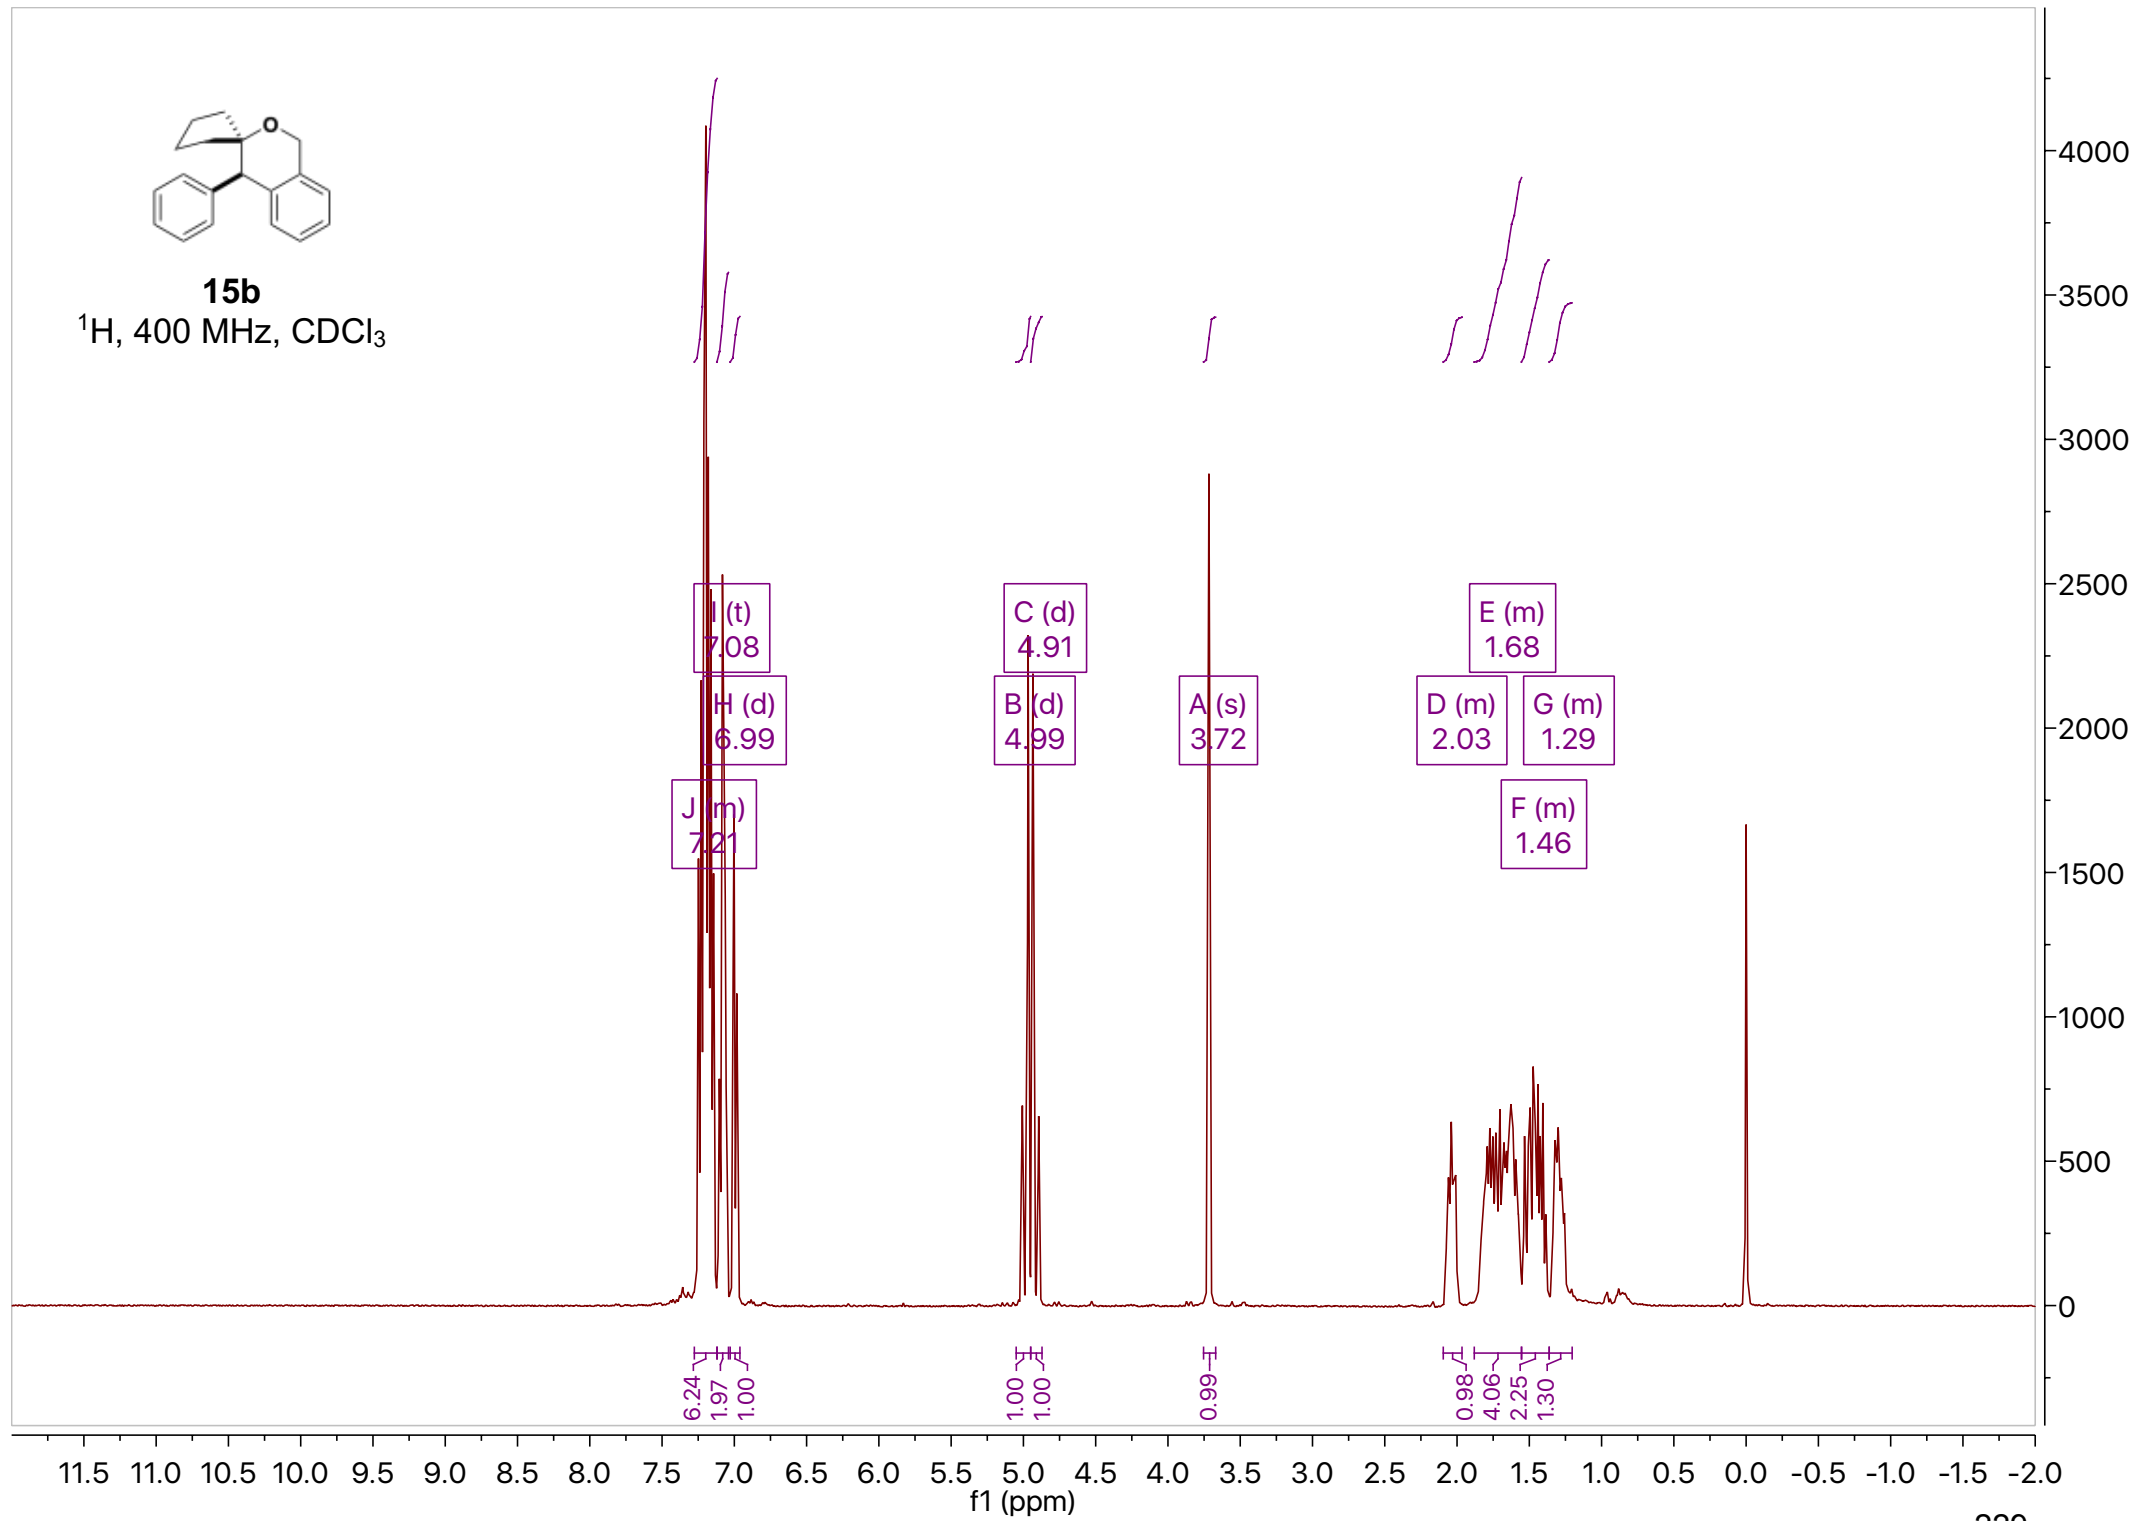



**15b**

$^{13}\text{C}$ , 100 MHz,  $\text{CDCl}_3$

143.86  
137.24  
133.63  
130.34  
129.46  
128.05  
126.60  
126.37  
126.26  
124.03

85.43

63.13

52.20

37.27

34.36

23.91

23.12

210 200 190 180 170 160 150 140 130 120 110 100 90 80 70 60 50 40 30 20 10 0 -10

f1 (ppm)

230

10000  
9000  
8000  
7000  
6000  
5000  
4000  
3000  
2000  
1000  
0  
-1000

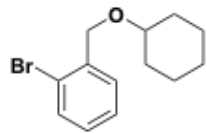

**64**

$^1\text{H}$ , 600 MHz,  $\text{CDCl}_3$

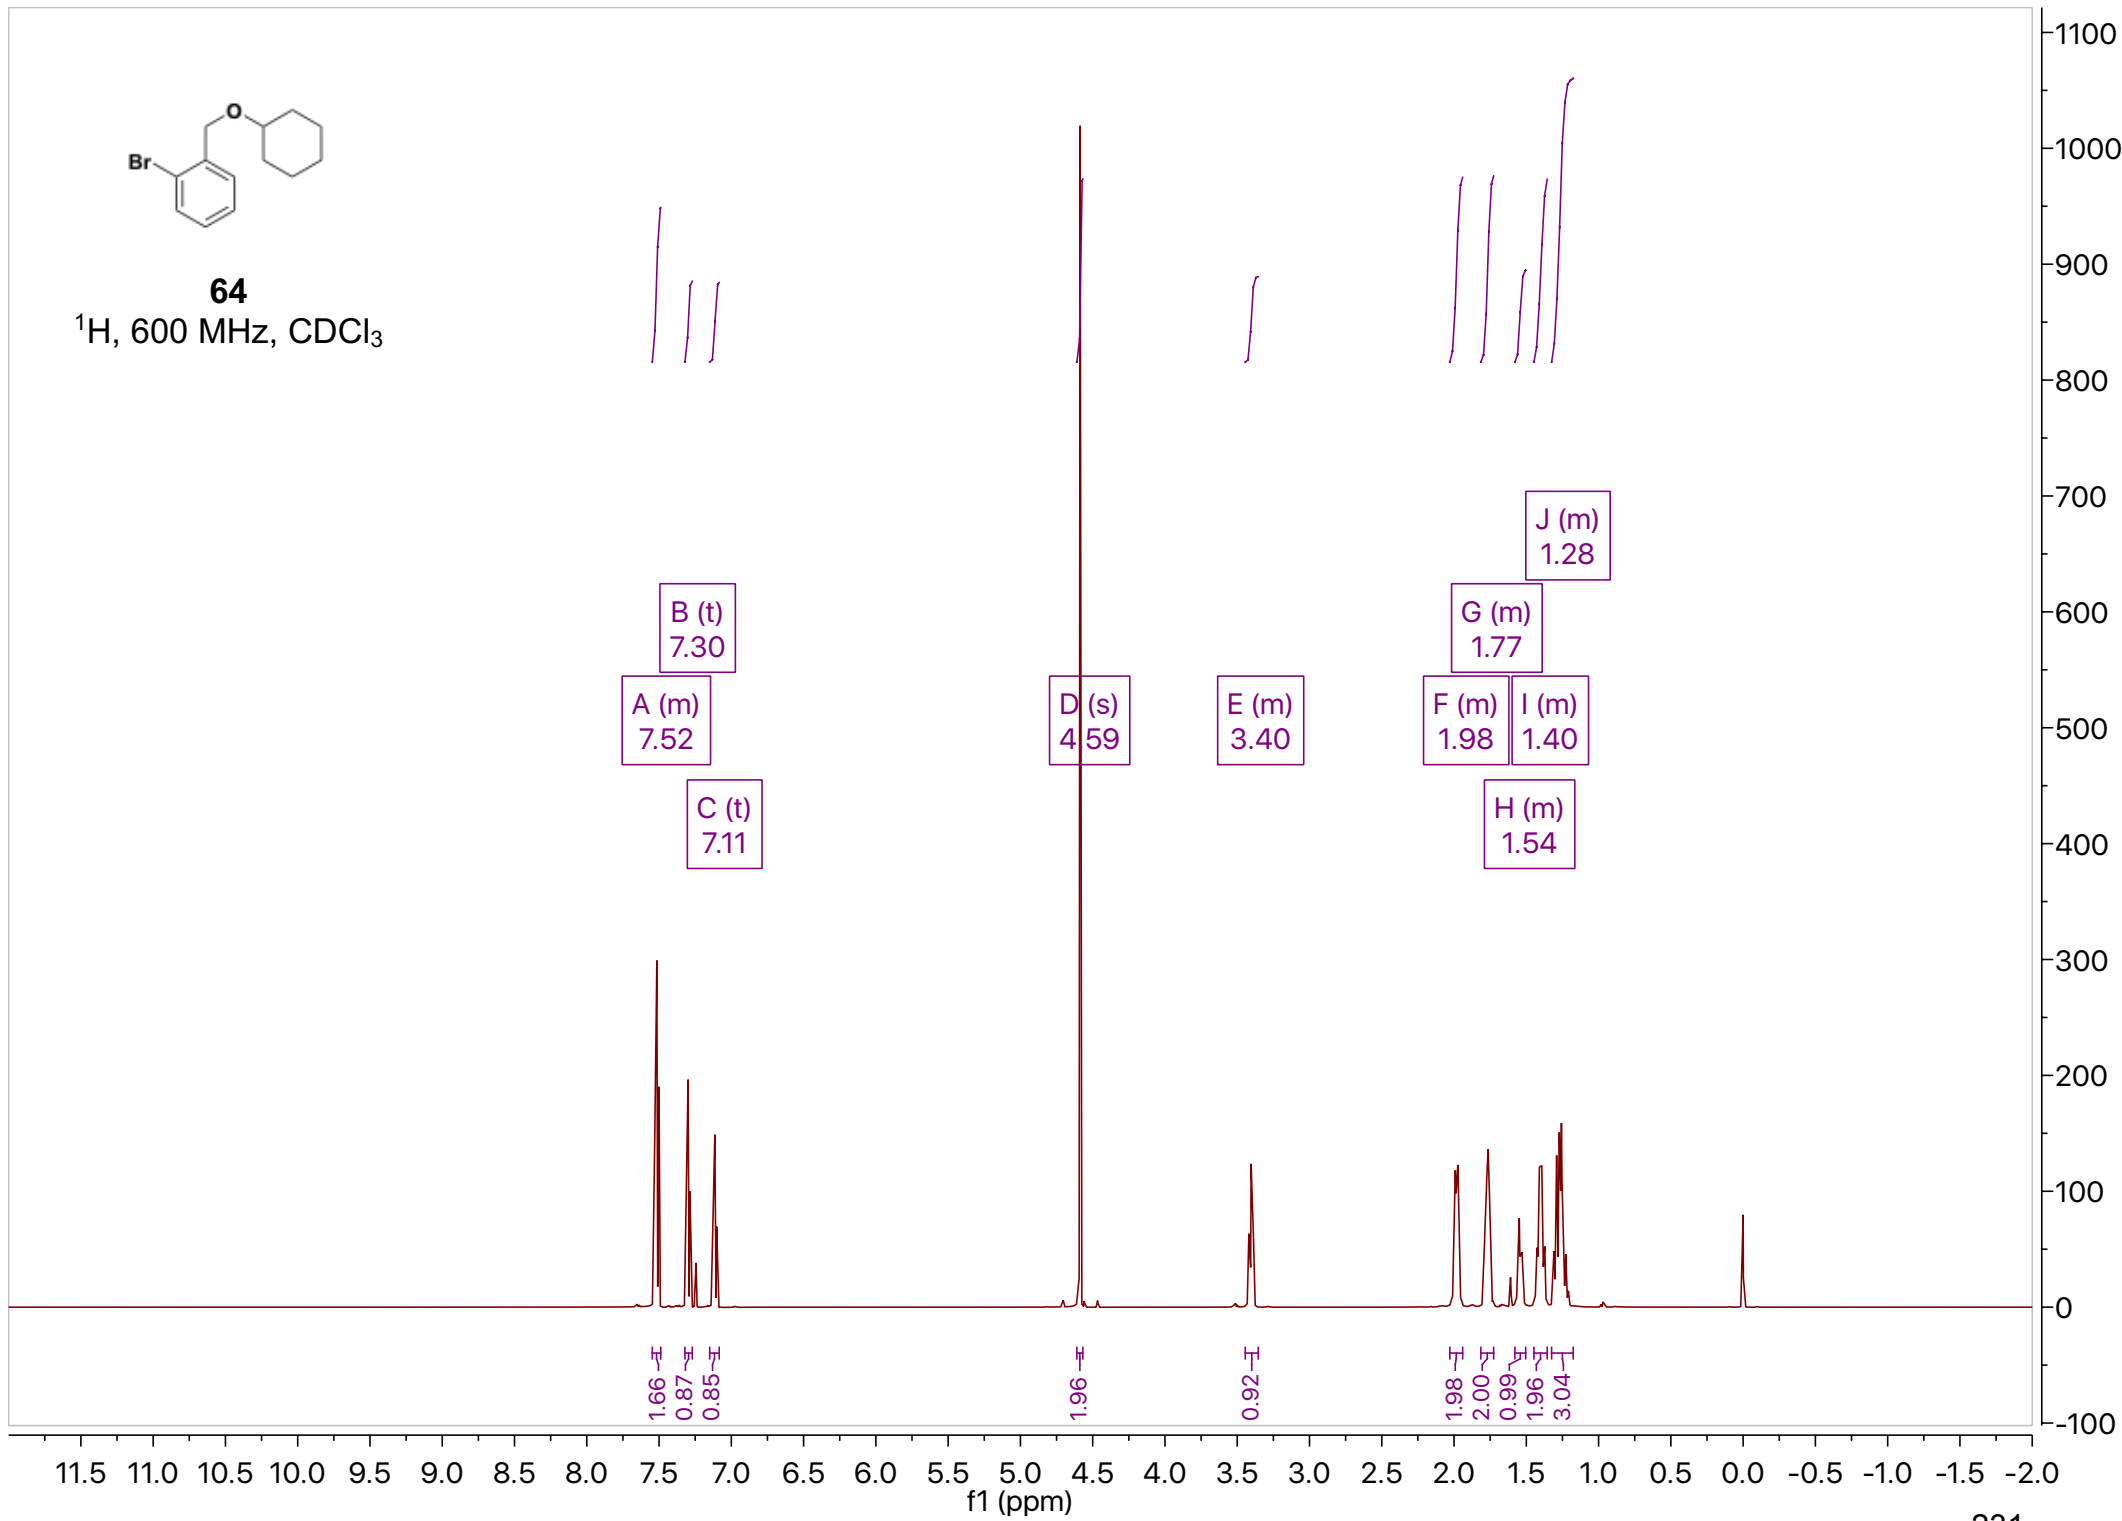

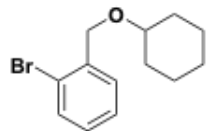

**64**

$^{13}\text{C}$ , 150 MHz,  $\text{CDCl}_3$

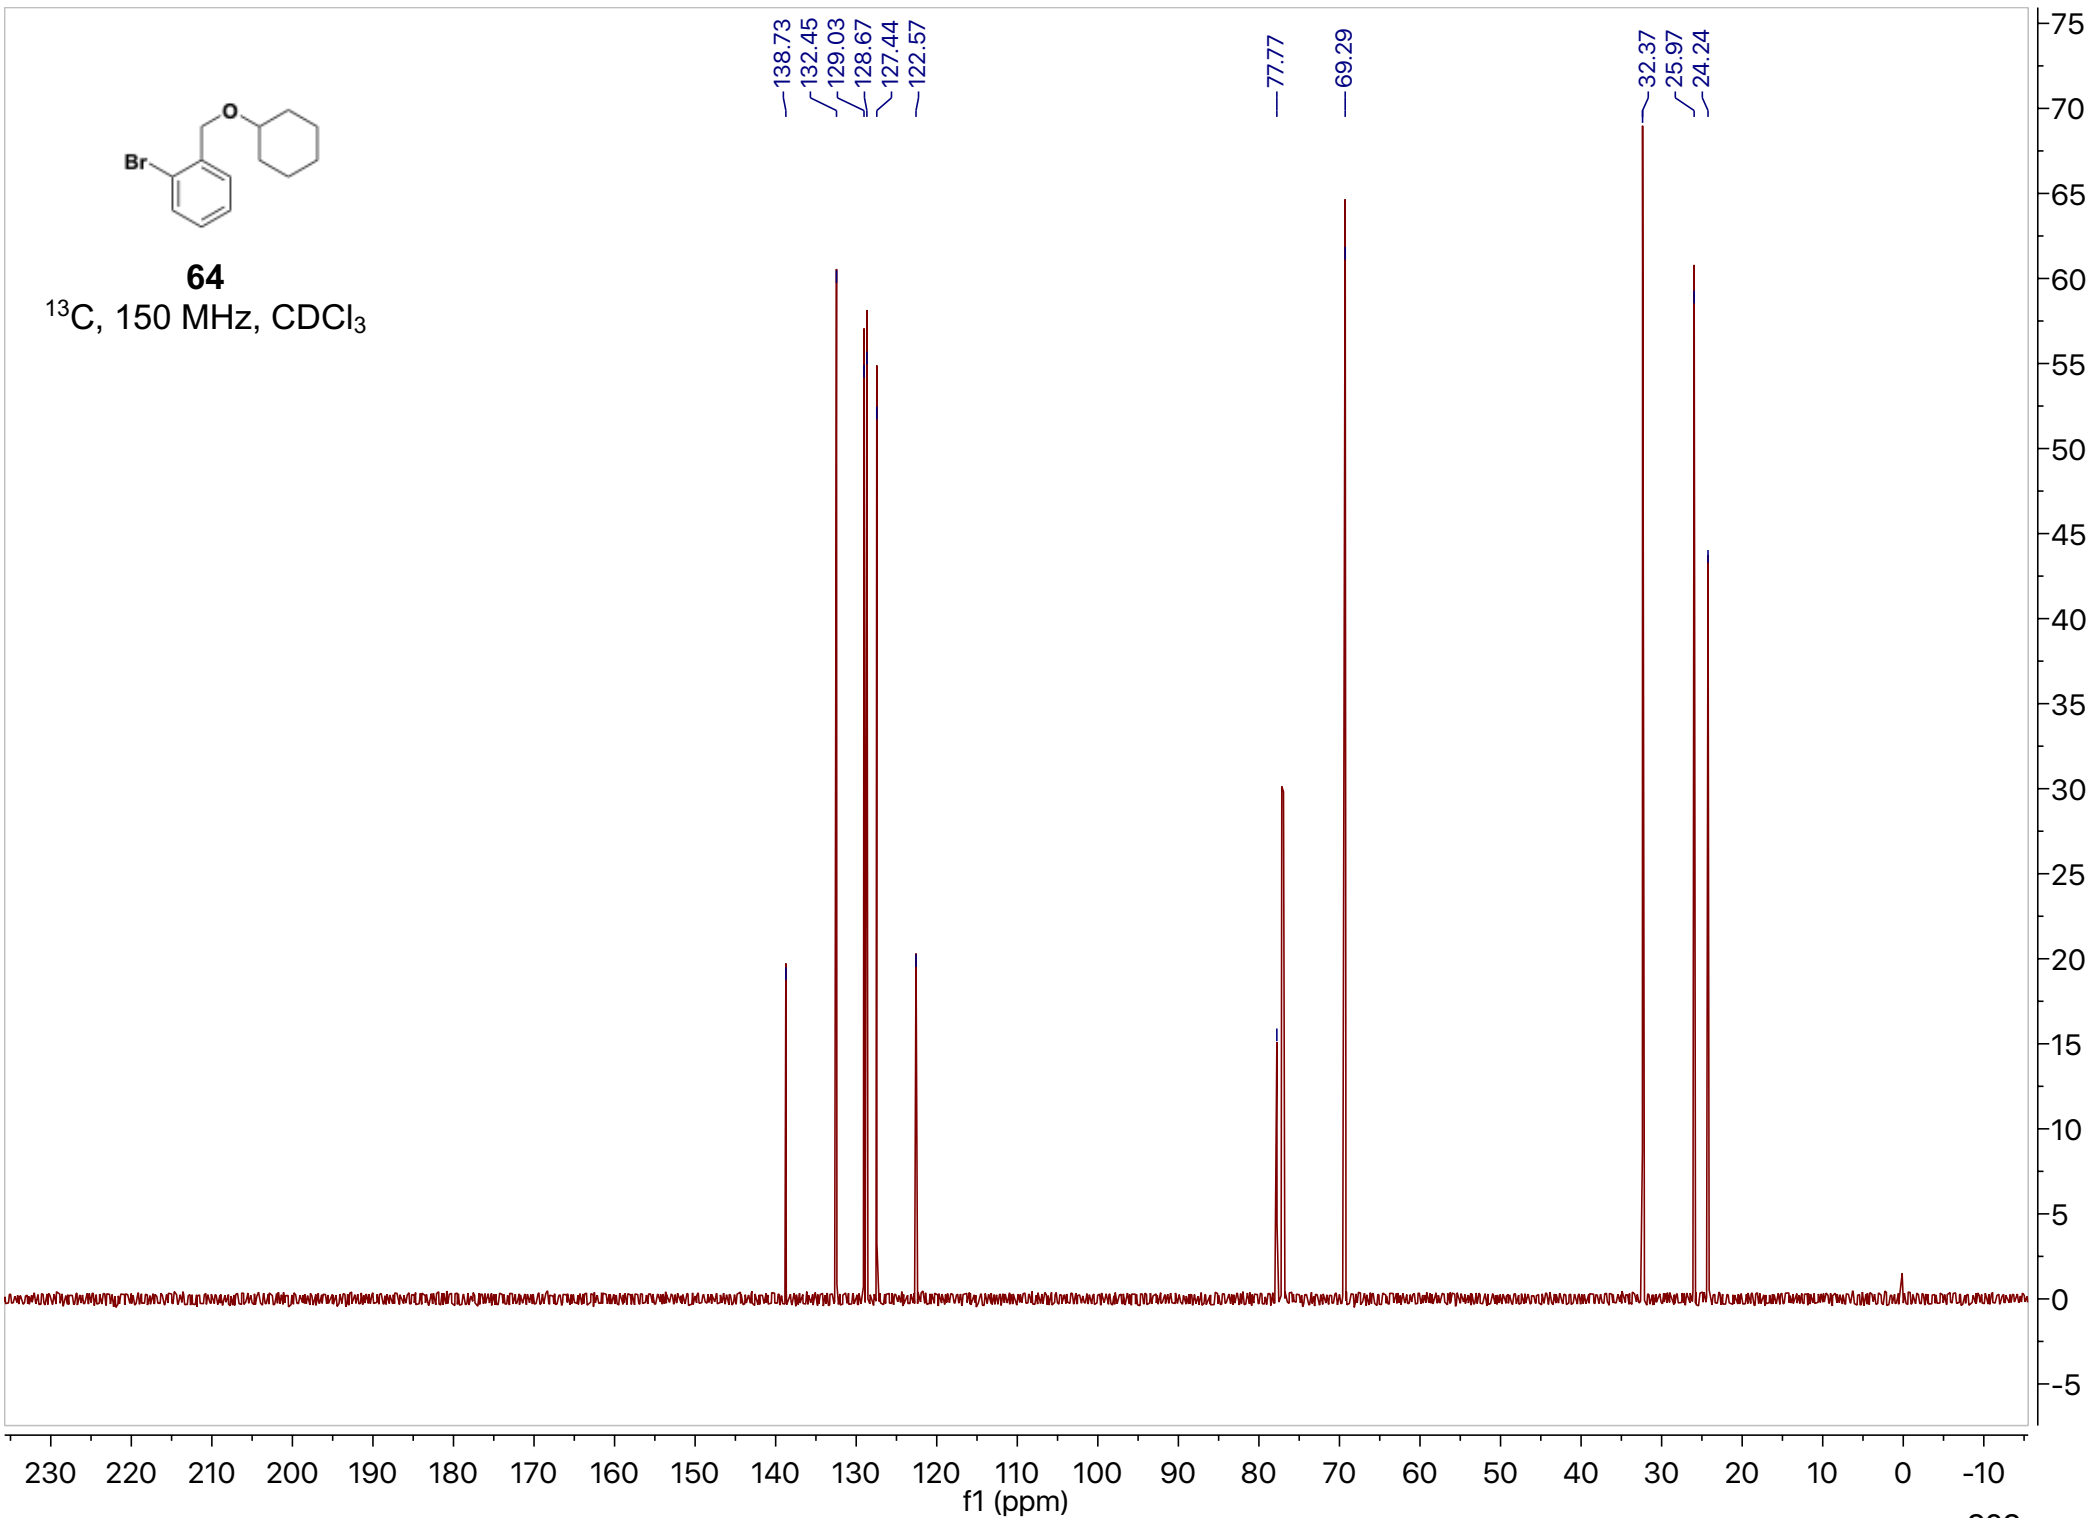

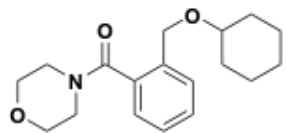

**65**

$^1\text{H}$ , 600 MHz,  $\text{CDCl}_3$

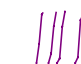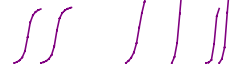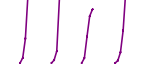

D (d)  
7.18

B (t)  
7.36

A (d)  
7.45

C (t)  
7.30

F (s)  
4.46

E (s)  
4.65

H (d)  
3.60

G (m)  
3.79

J (d)  
3.27

I (m)  
3.36

L (m)  
1.76

K (d)  
1.98

N (m)  
1.26

M (m)  
1.56

0.94  
0.95  
0.96  
0.91

1.01  
1.04

4.27  
2.17  
1.02  
2.08

2.02  
2.19  
1.01  
5.31

11.5 11.0 10.5 10.0 9.5 9.0 8.5 8.0 7.5 7.0 6.5 6.0 5.5 5.0 4.5 4.0 3.5 3.0 2.5 2.0 1.5 1.0 0.5 0.0 -0.5 -1.0 -1.5 -2.0  
f1 (ppm)

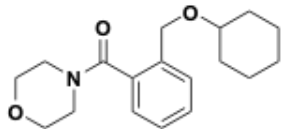

**65**

$^{13}\text{C}$ , 150 MHz,  $\text{CDCl}_3$

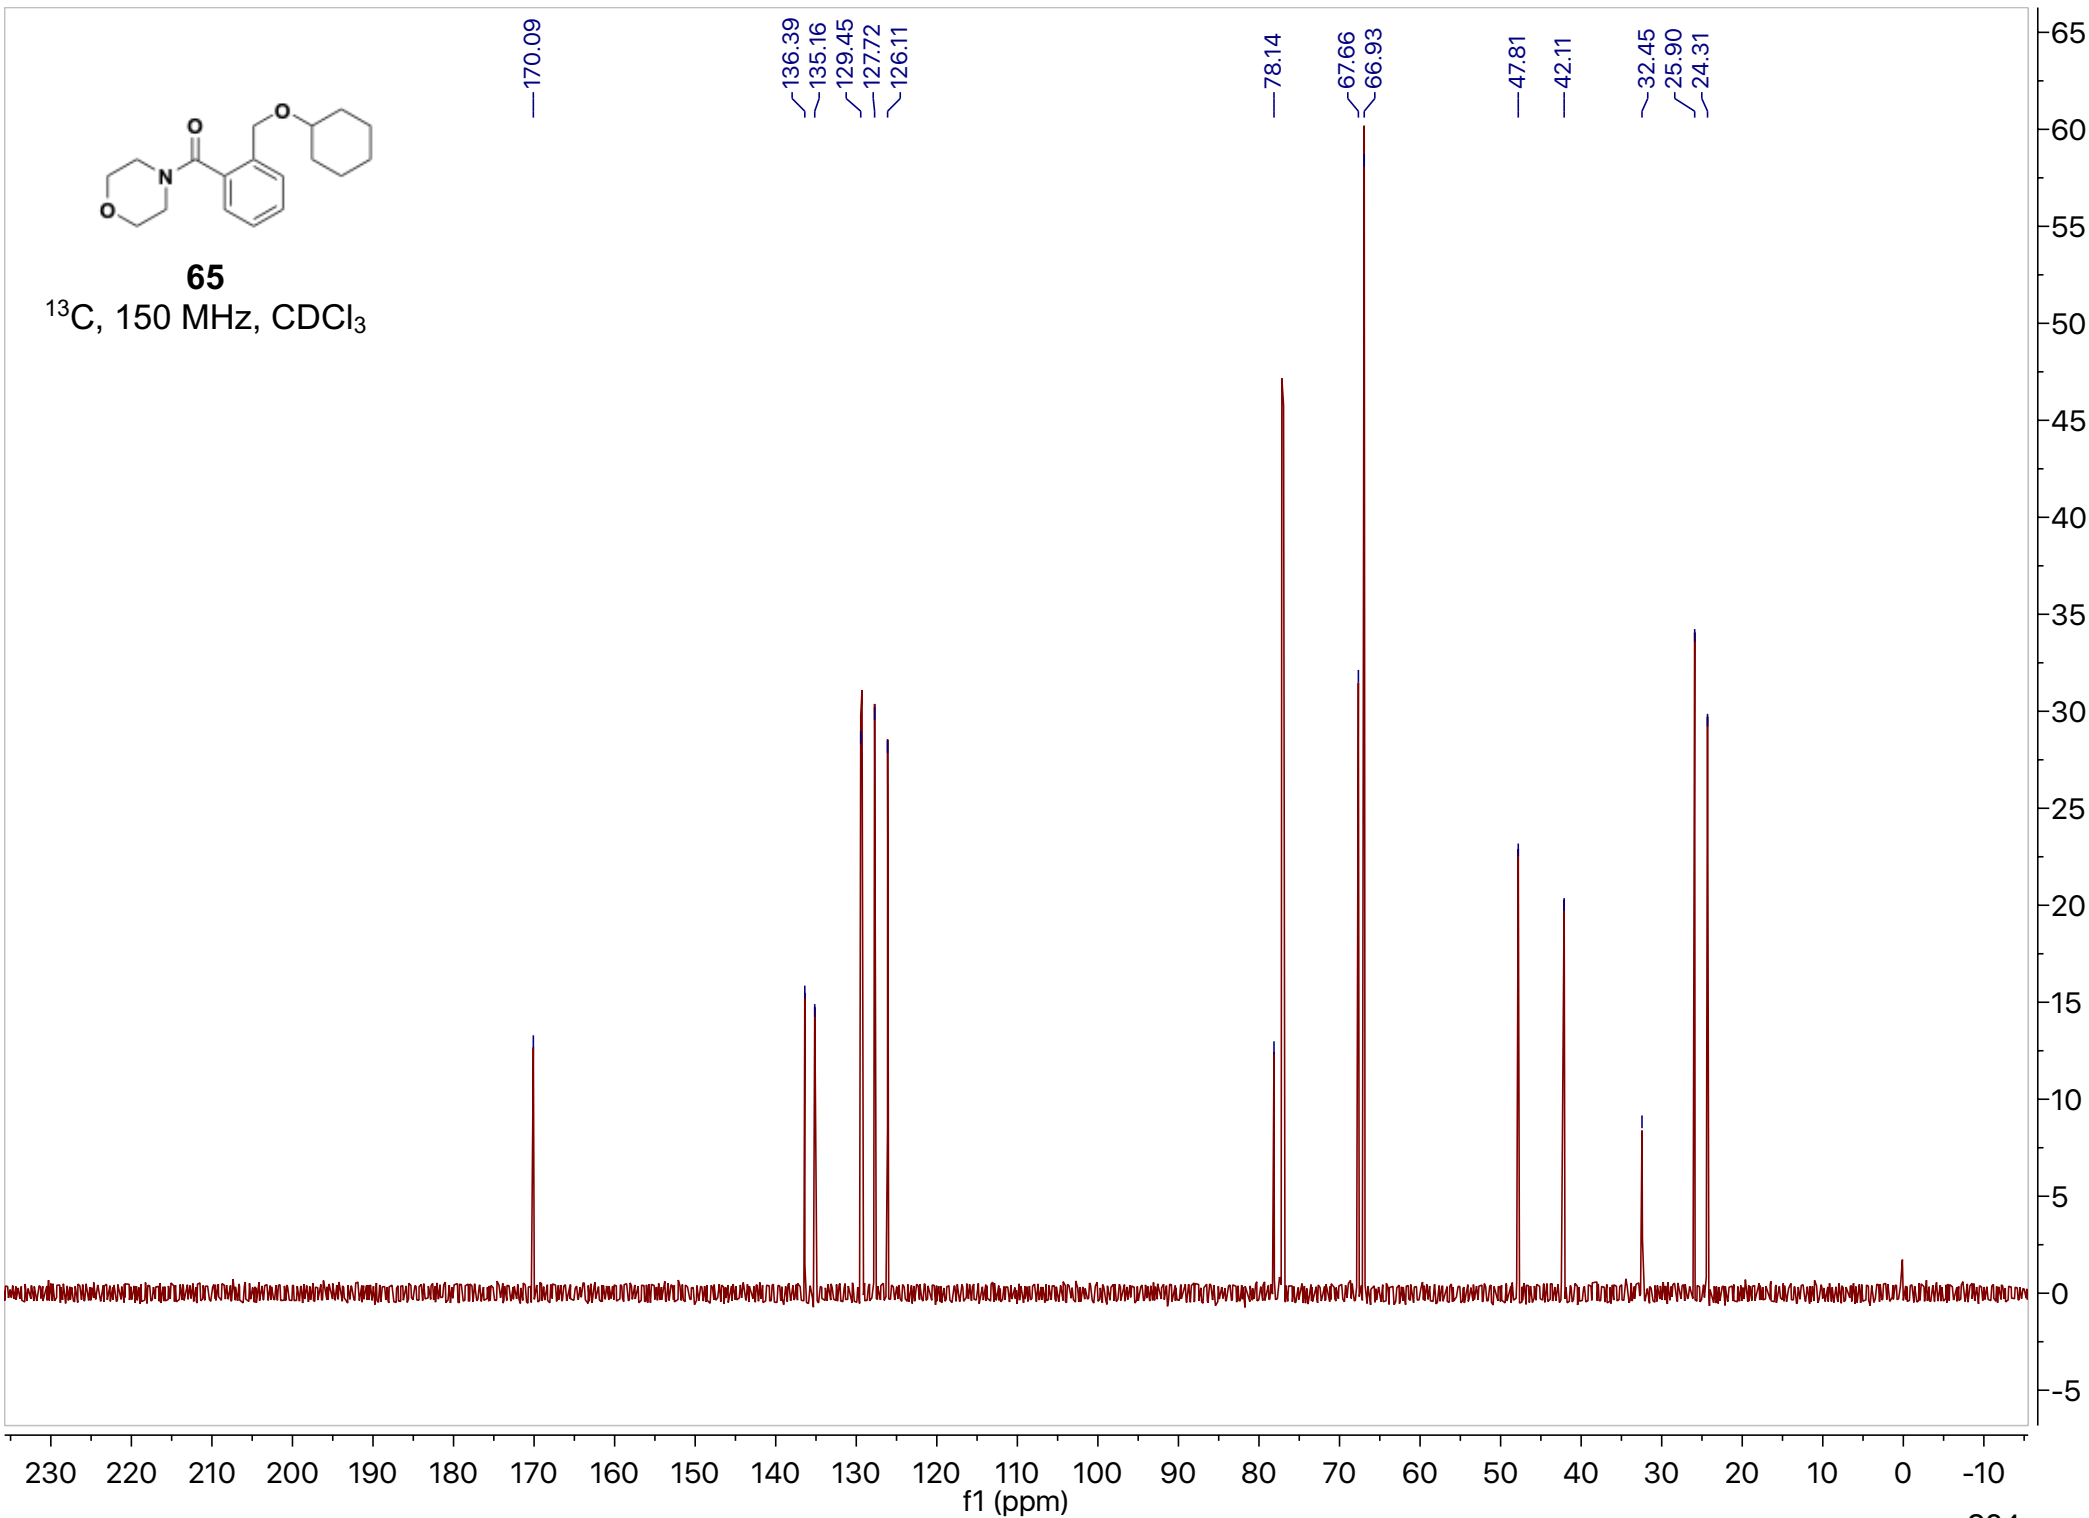

—170.09

—136.39

—135.16

—129.45

—127.72

—126.11

—78.14

—67.66

—66.93

—47.81

—42.11

—32.45

—25.90

—24.31

f1 (ppm)

234



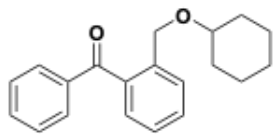

**66**

<sup>1</sup>H, 600 MHz, CDCl<sub>3</sub>

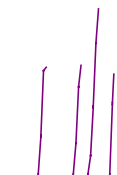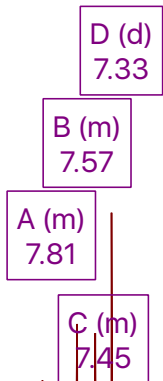

1.97  
2.00  
3.05  
1.84

A (m)  
7.81

B (m)  
7.57

D (d)  
7.33

C (m)  
7.45

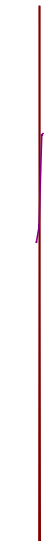

E (s)  
4.61

2.00

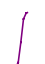

F (m)  
3.18

1.00

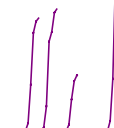

G (m)  
1.73

2.08  
2.25  
1.03

I (m)  
1.45

H (m)  
1.59

J (m)  
1.15

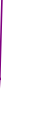

I (m)  
1.45

5.23

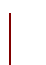

11.5 11.0 10.5 10.0 9.5 9.0 8.5 8.0 7.5 7.0 6.5 6.0 5.5 5.0 4.5 4.0 3.5 3.0 2.5 2.0 1.5 1.0 0.5 0.0 -0.5 -1.0 -1.5 -2.0  
f1 (ppm)

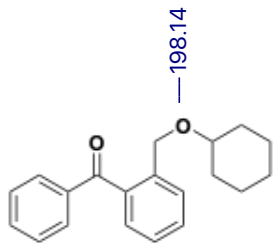

**66**

$^{13}\text{C}$ , 150 MHz,  $\text{CDCl}_3$

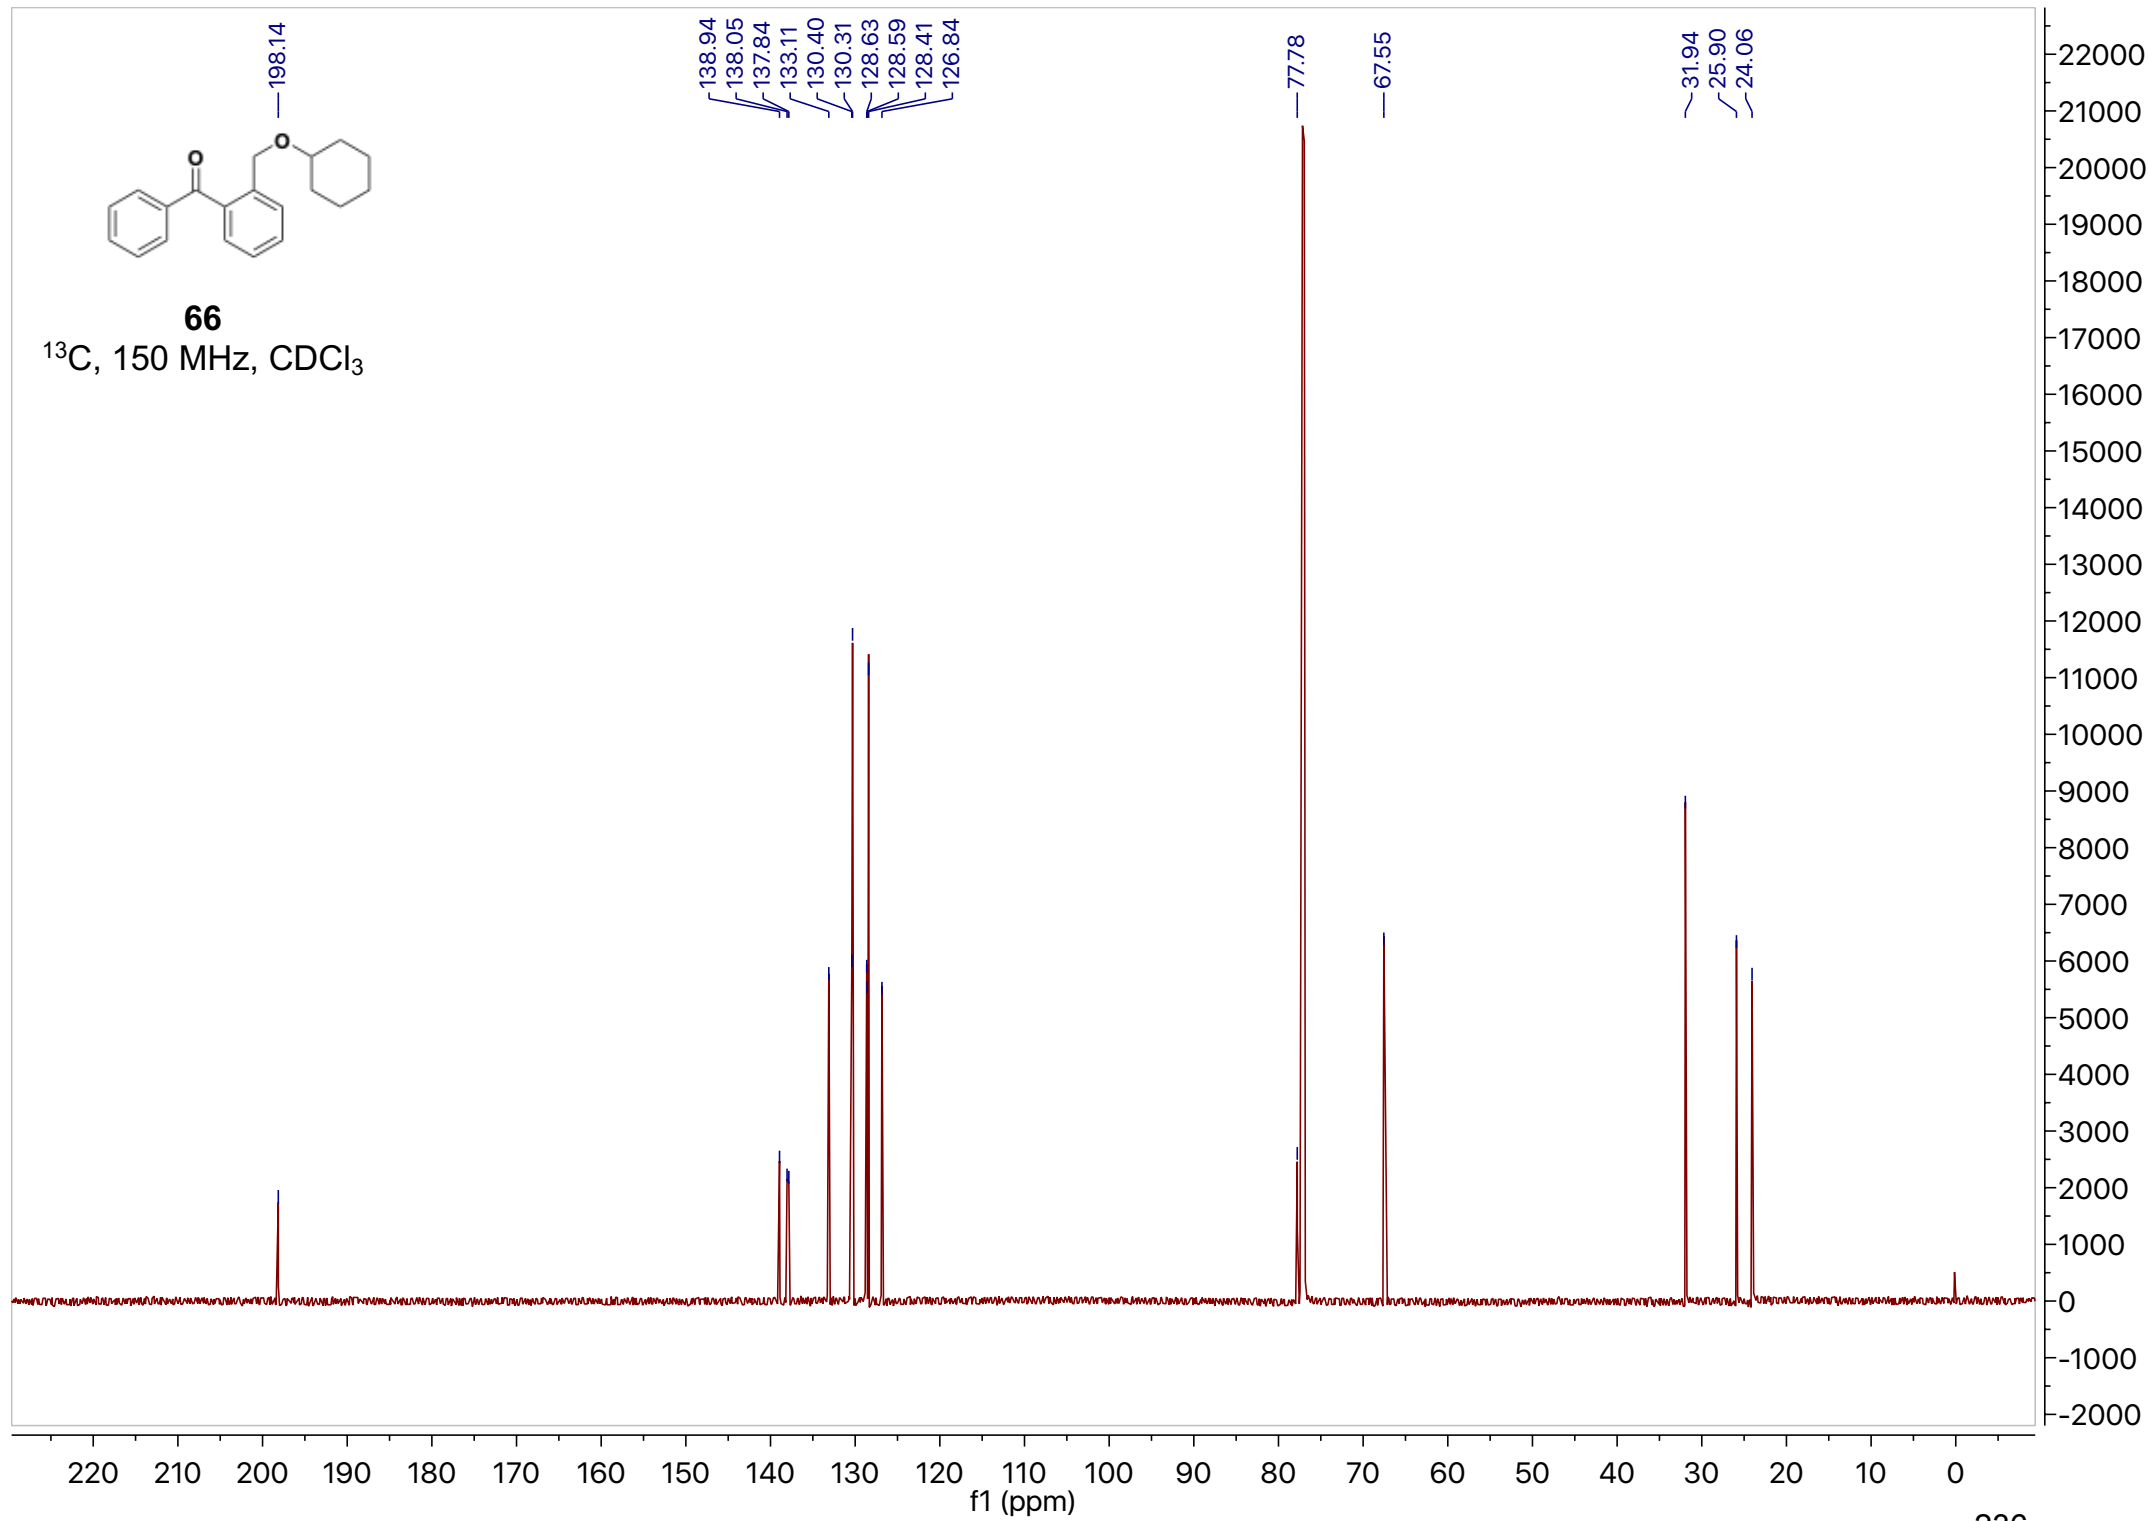

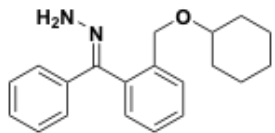

**14c**

$^1\text{H}$ , 600 MHz,  $\text{CDCl}_3$

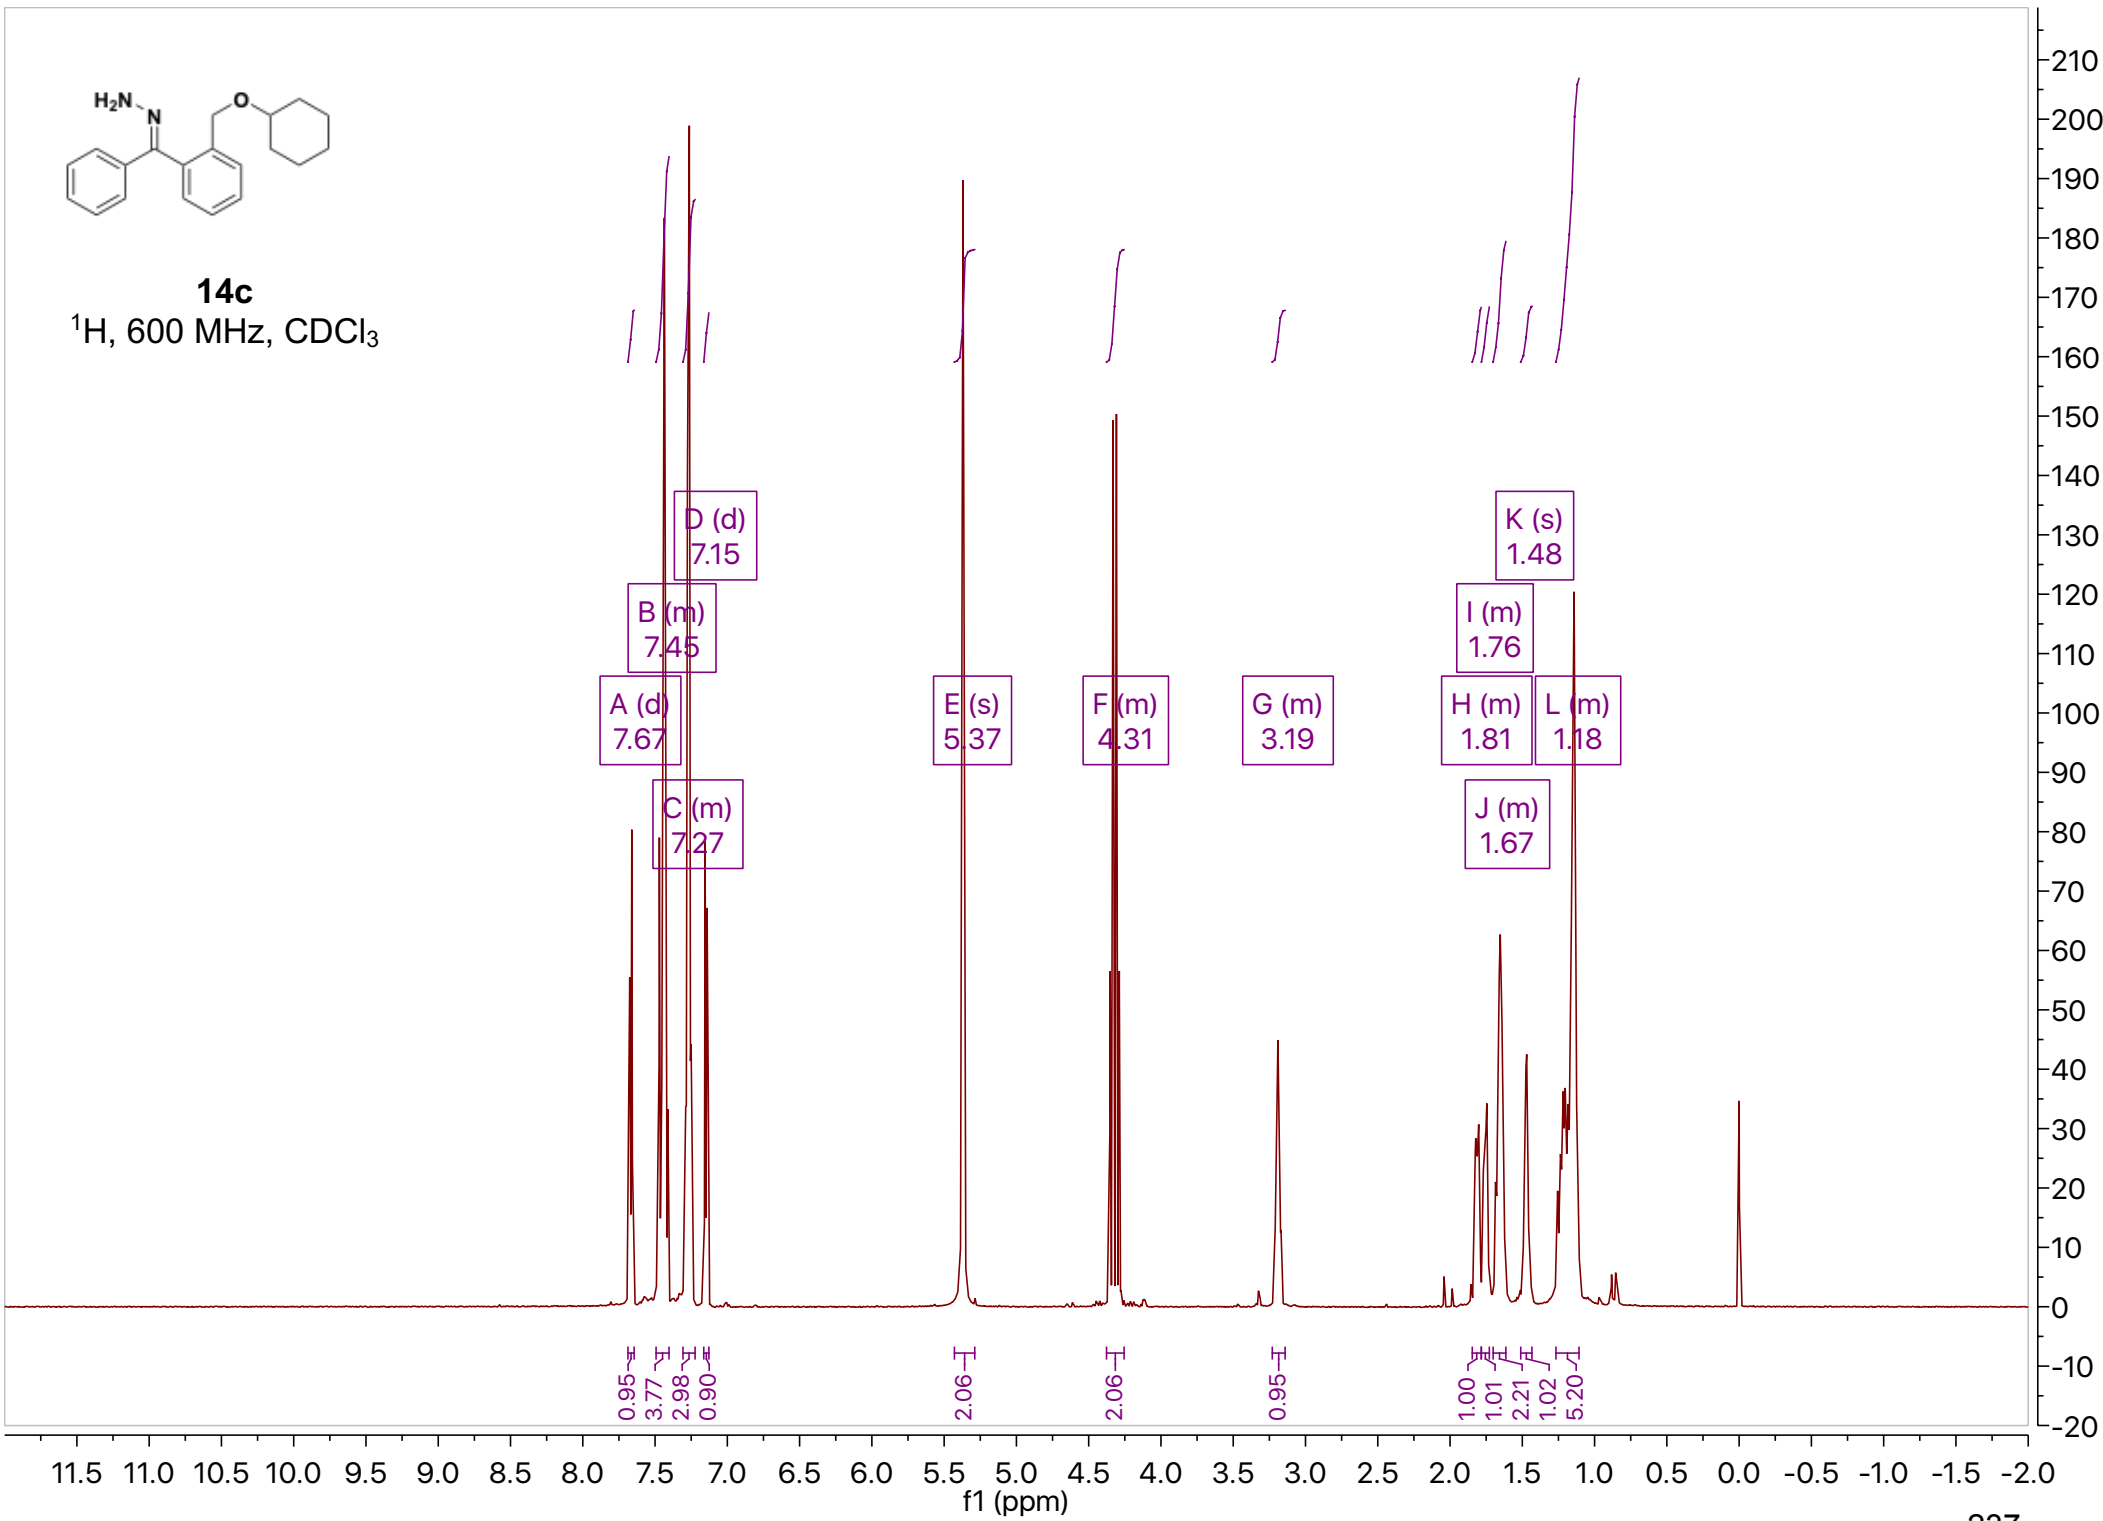

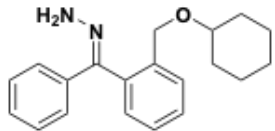

**14c**

$^{13}\text{C}$ , 150 MHz,  $\text{CDCl}_3$

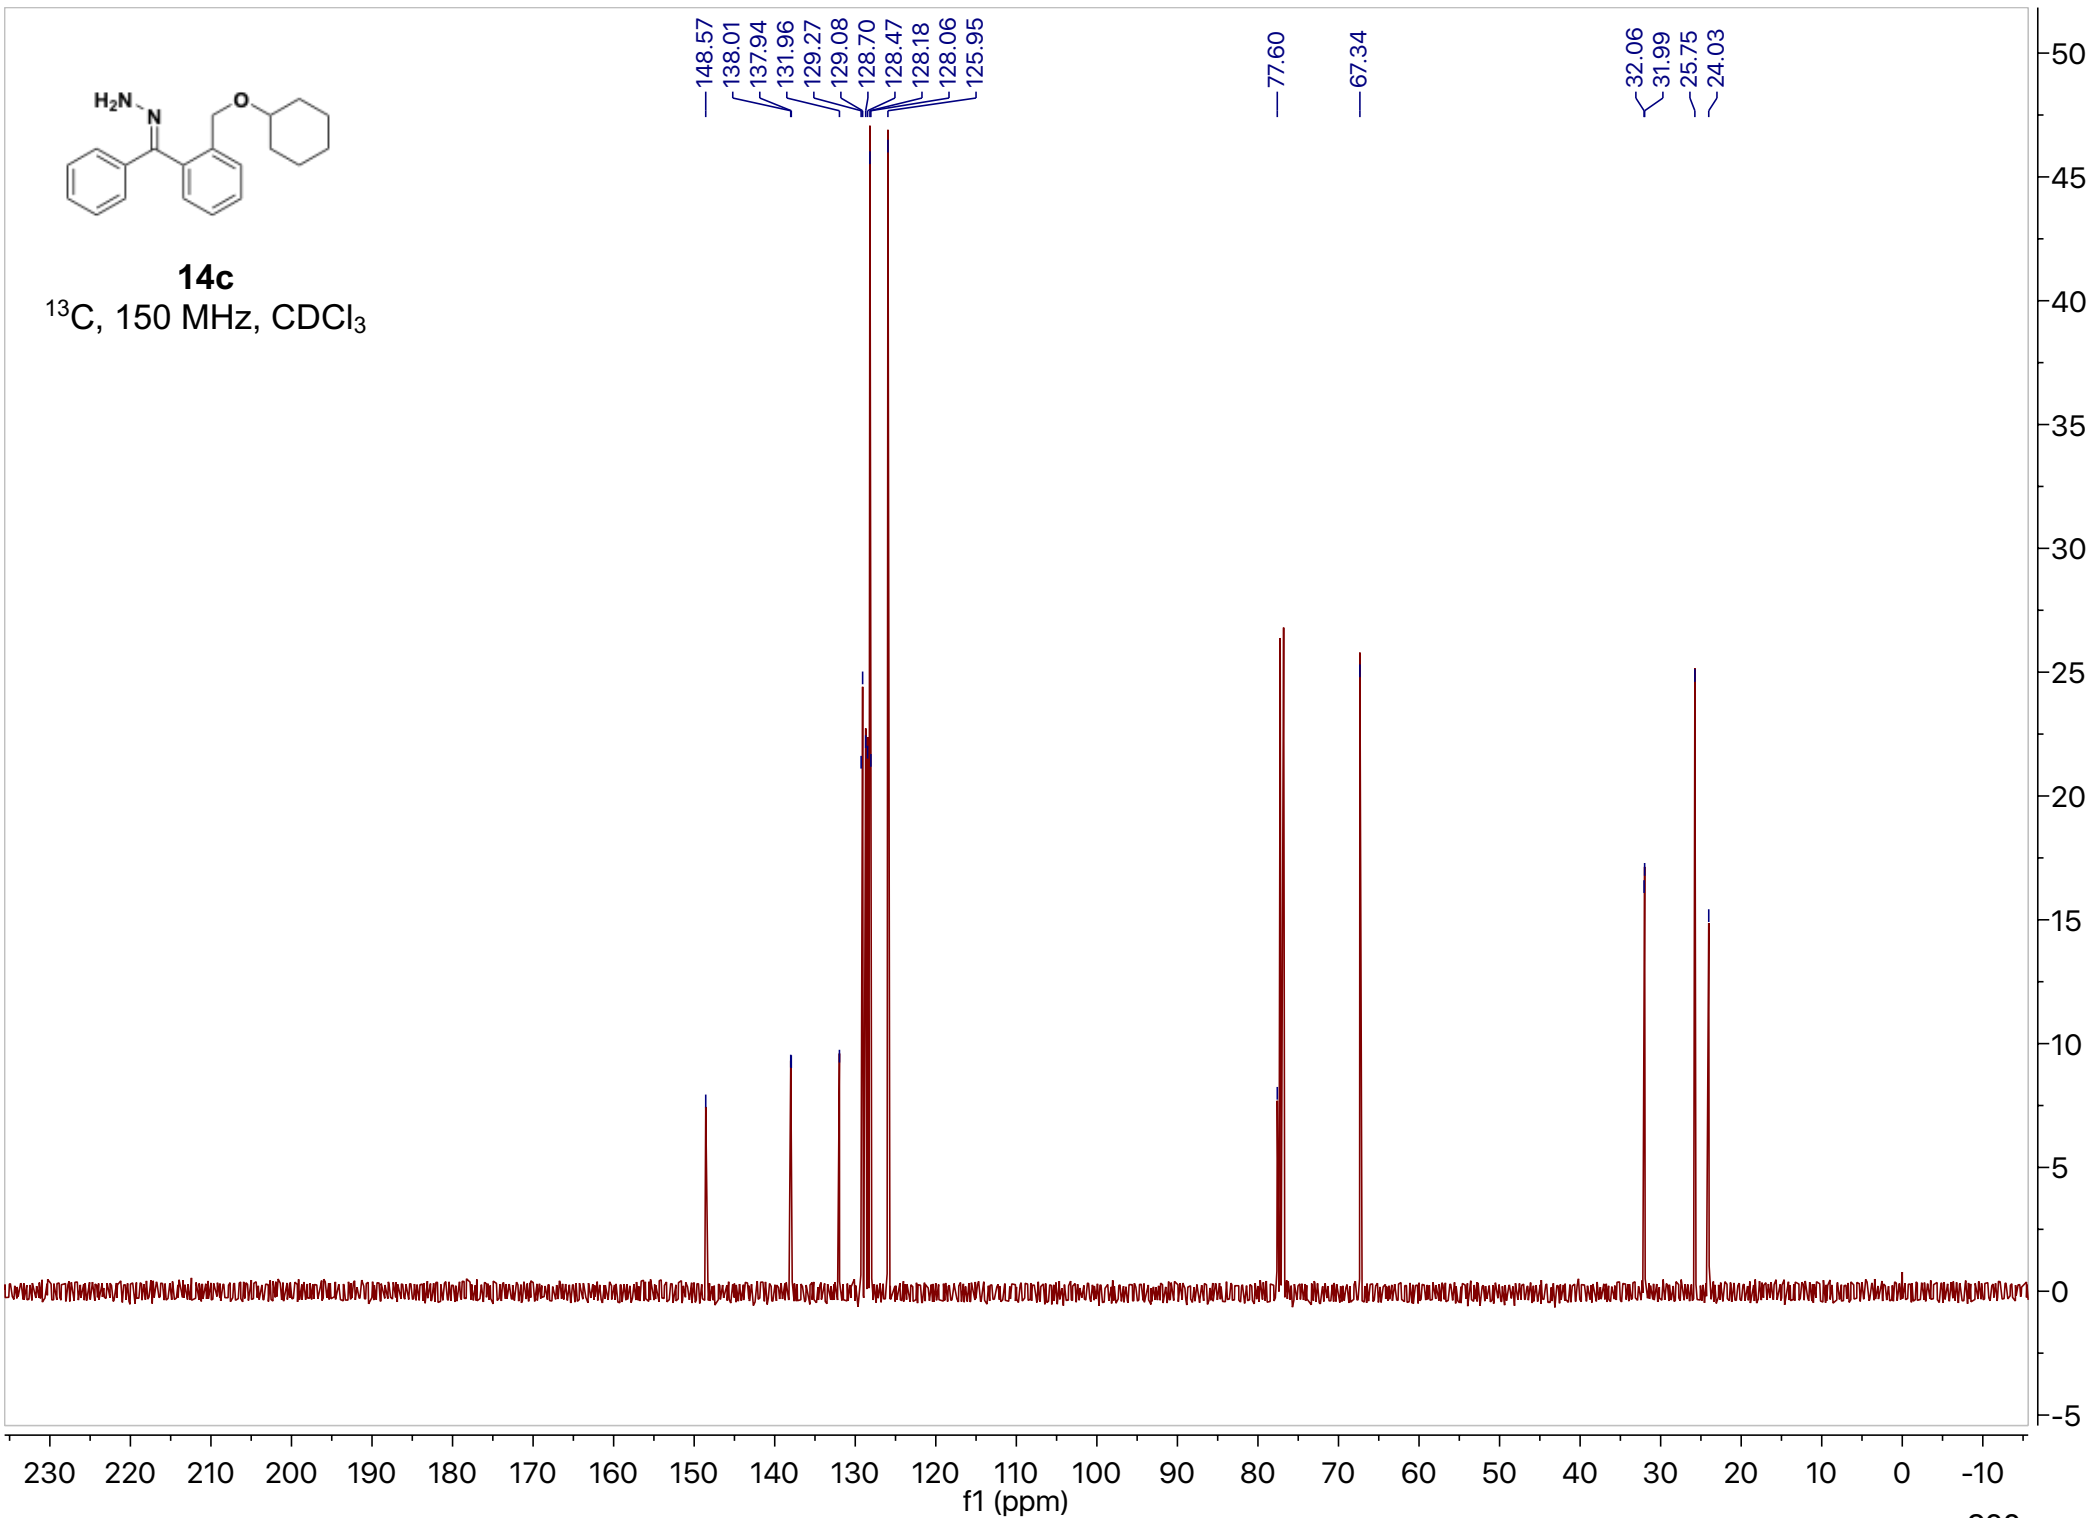

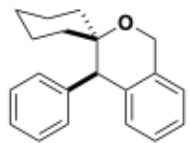

**15c**

<sup>1</sup>H, 400 MHz, CDCl<sub>3</sub>

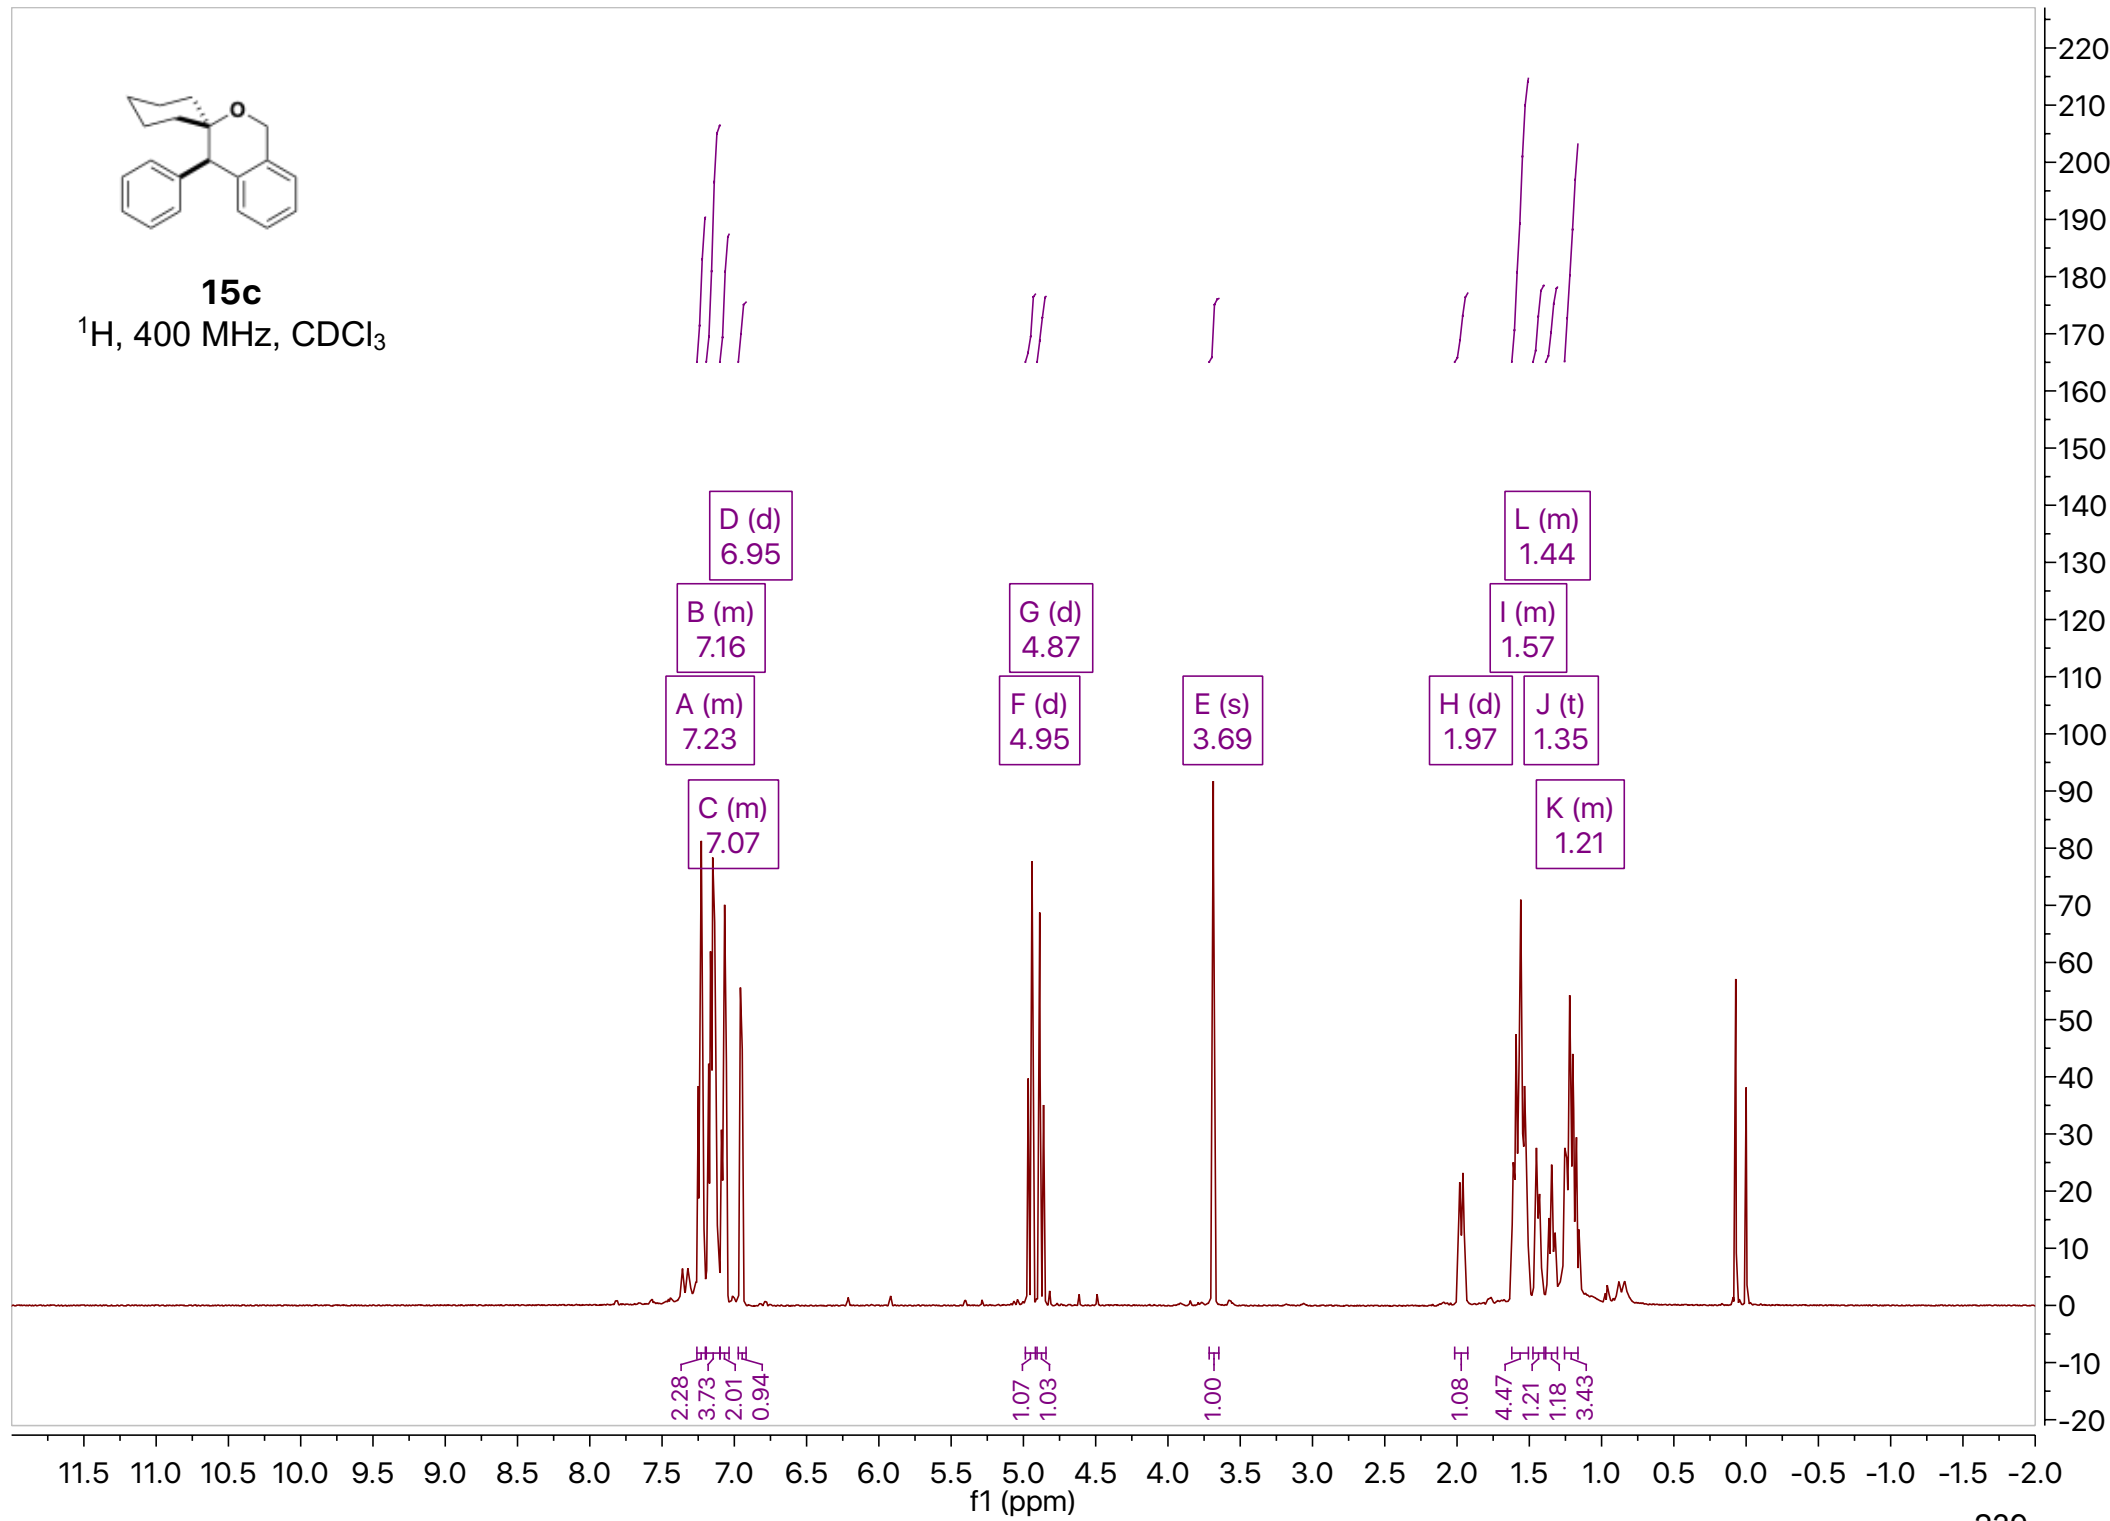

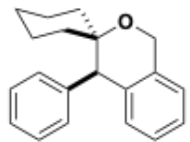

**15c**

$^{13}\text{C}$ , 100 MHz,  $\text{CD}_2\text{Cl}_2$

143.10  
136.77  
133.71  
130.46  
129.76  
127.76  
126.42  
126.12  
125.89  
123.79

73.73

62.01

53.01

34.96

33.07

25.83

22.29

21.57

210 200 190 180 170 160 150 140 130 120 110 100 90 80 70 60 50 40 30 20 10 0 -10

f1 (ppm)

240

2400  
2200  
2000  
1800  
1600  
1400  
1200  
1000  
800  
600  
400  
200  
0  
-200

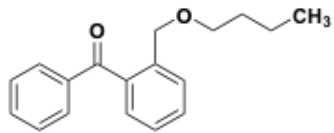

**68**

$^1\text{H}$ , 400 MHz,  $\text{CDCl}_3$

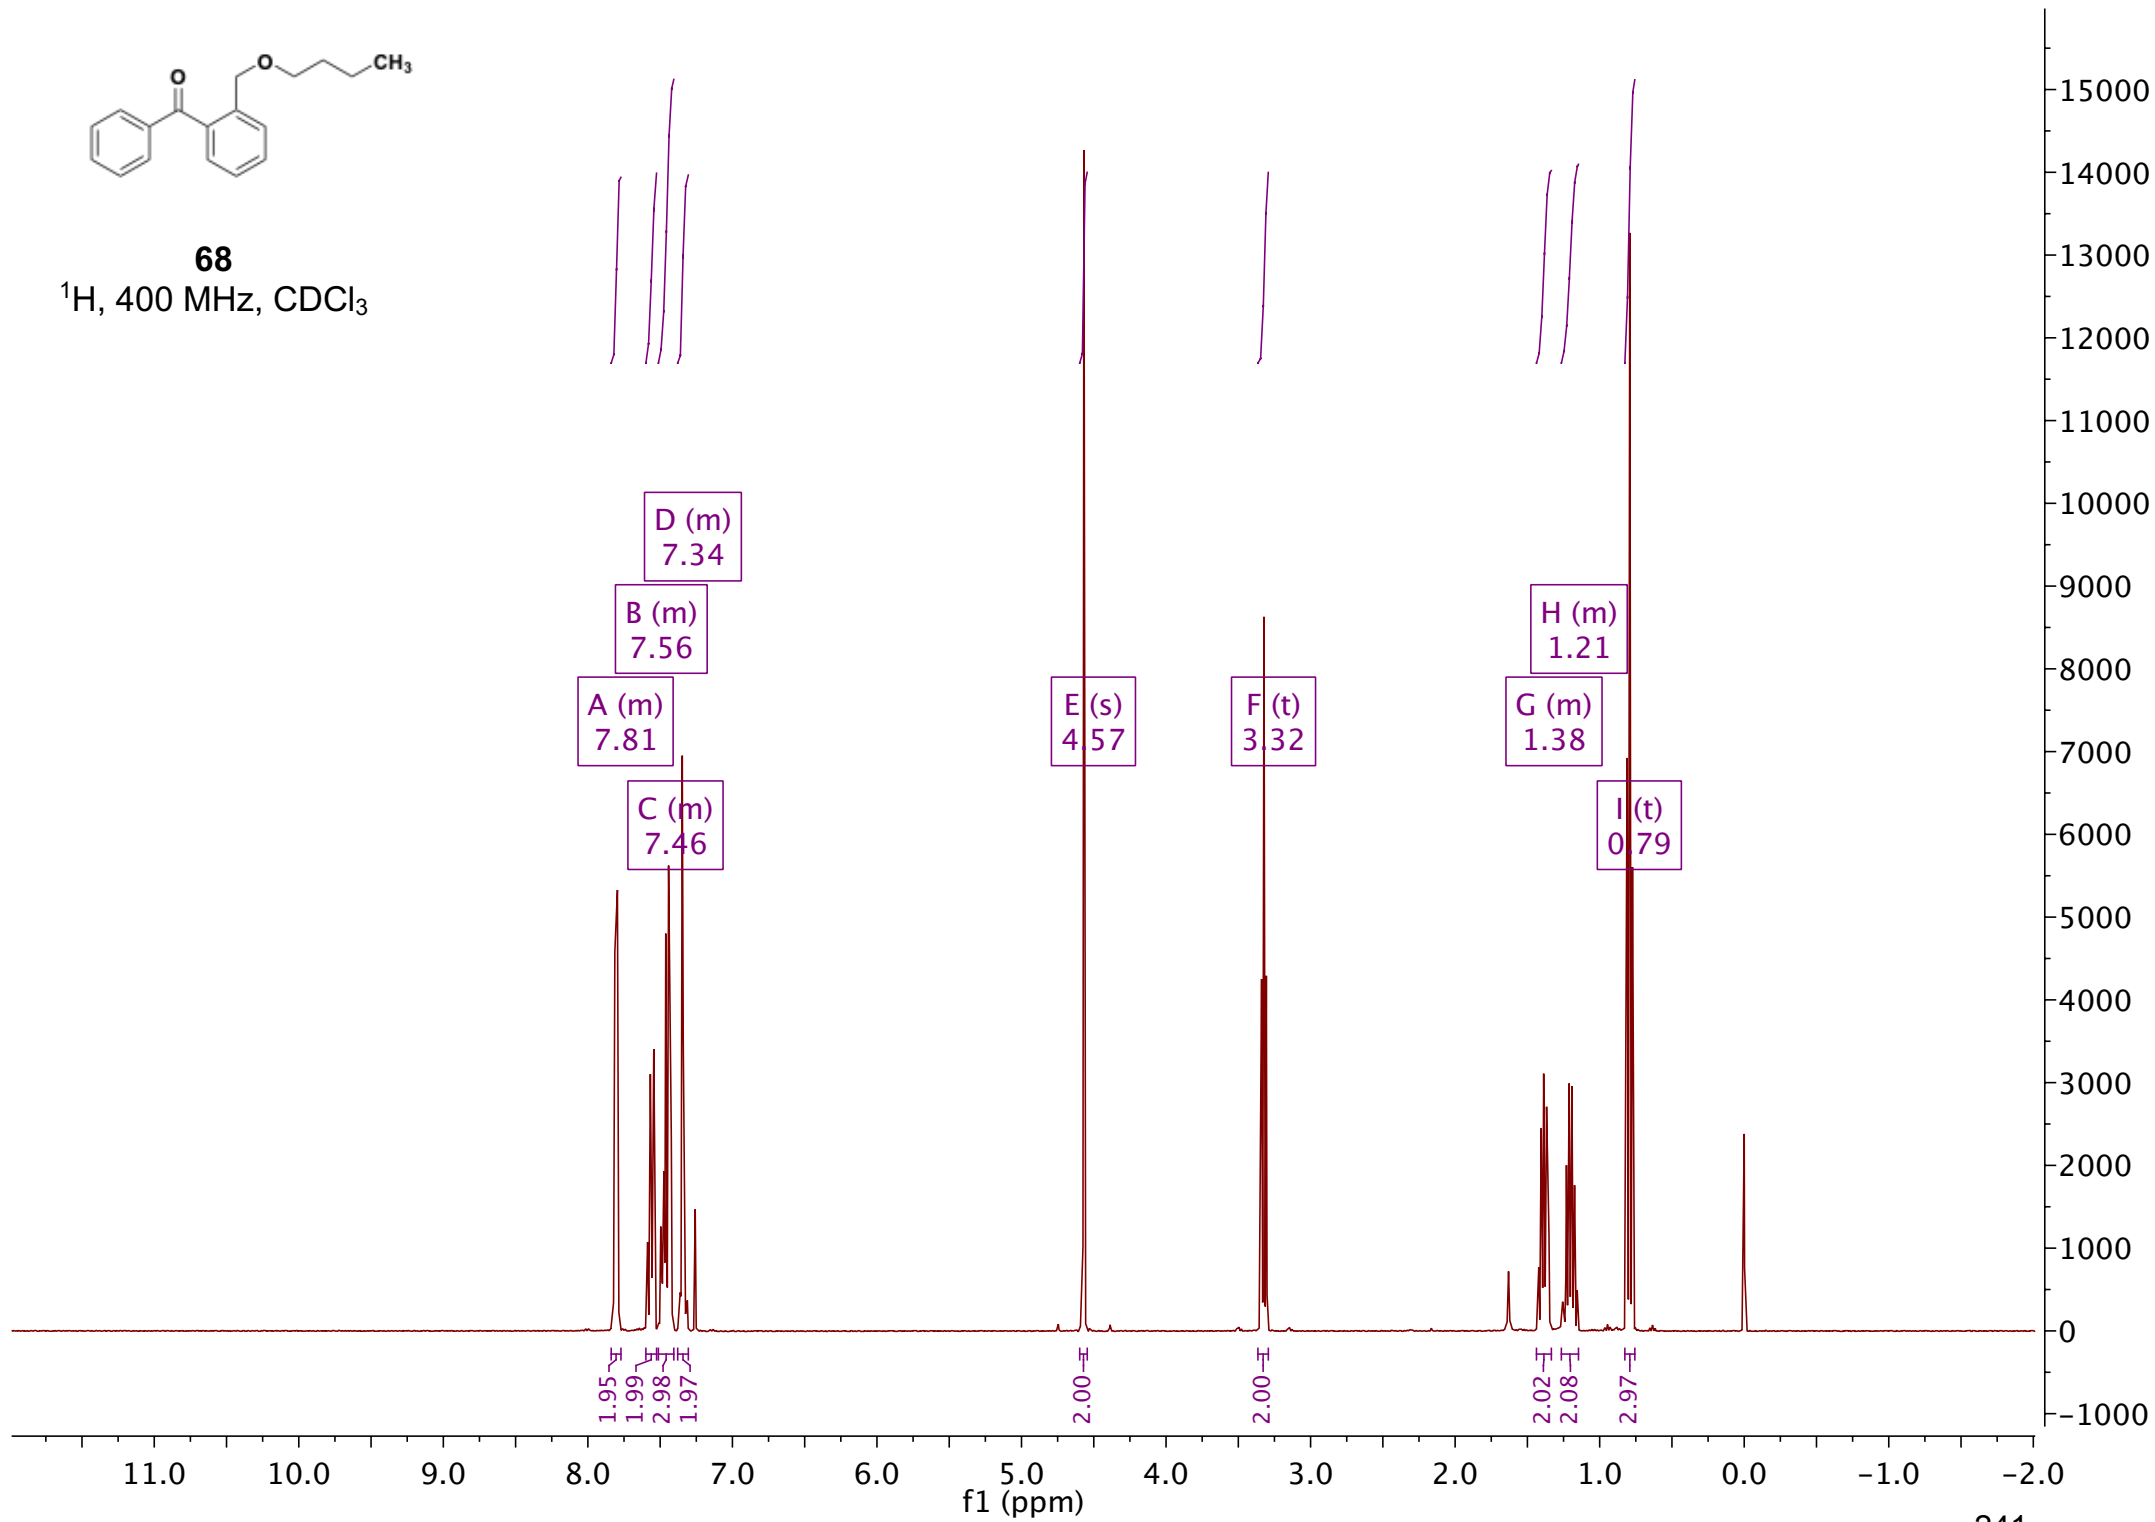

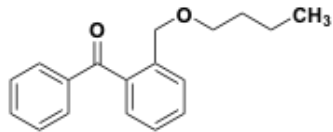

**68**

$^{13}\text{C}$ , 100 MHz,  $\text{CDCl}_3$

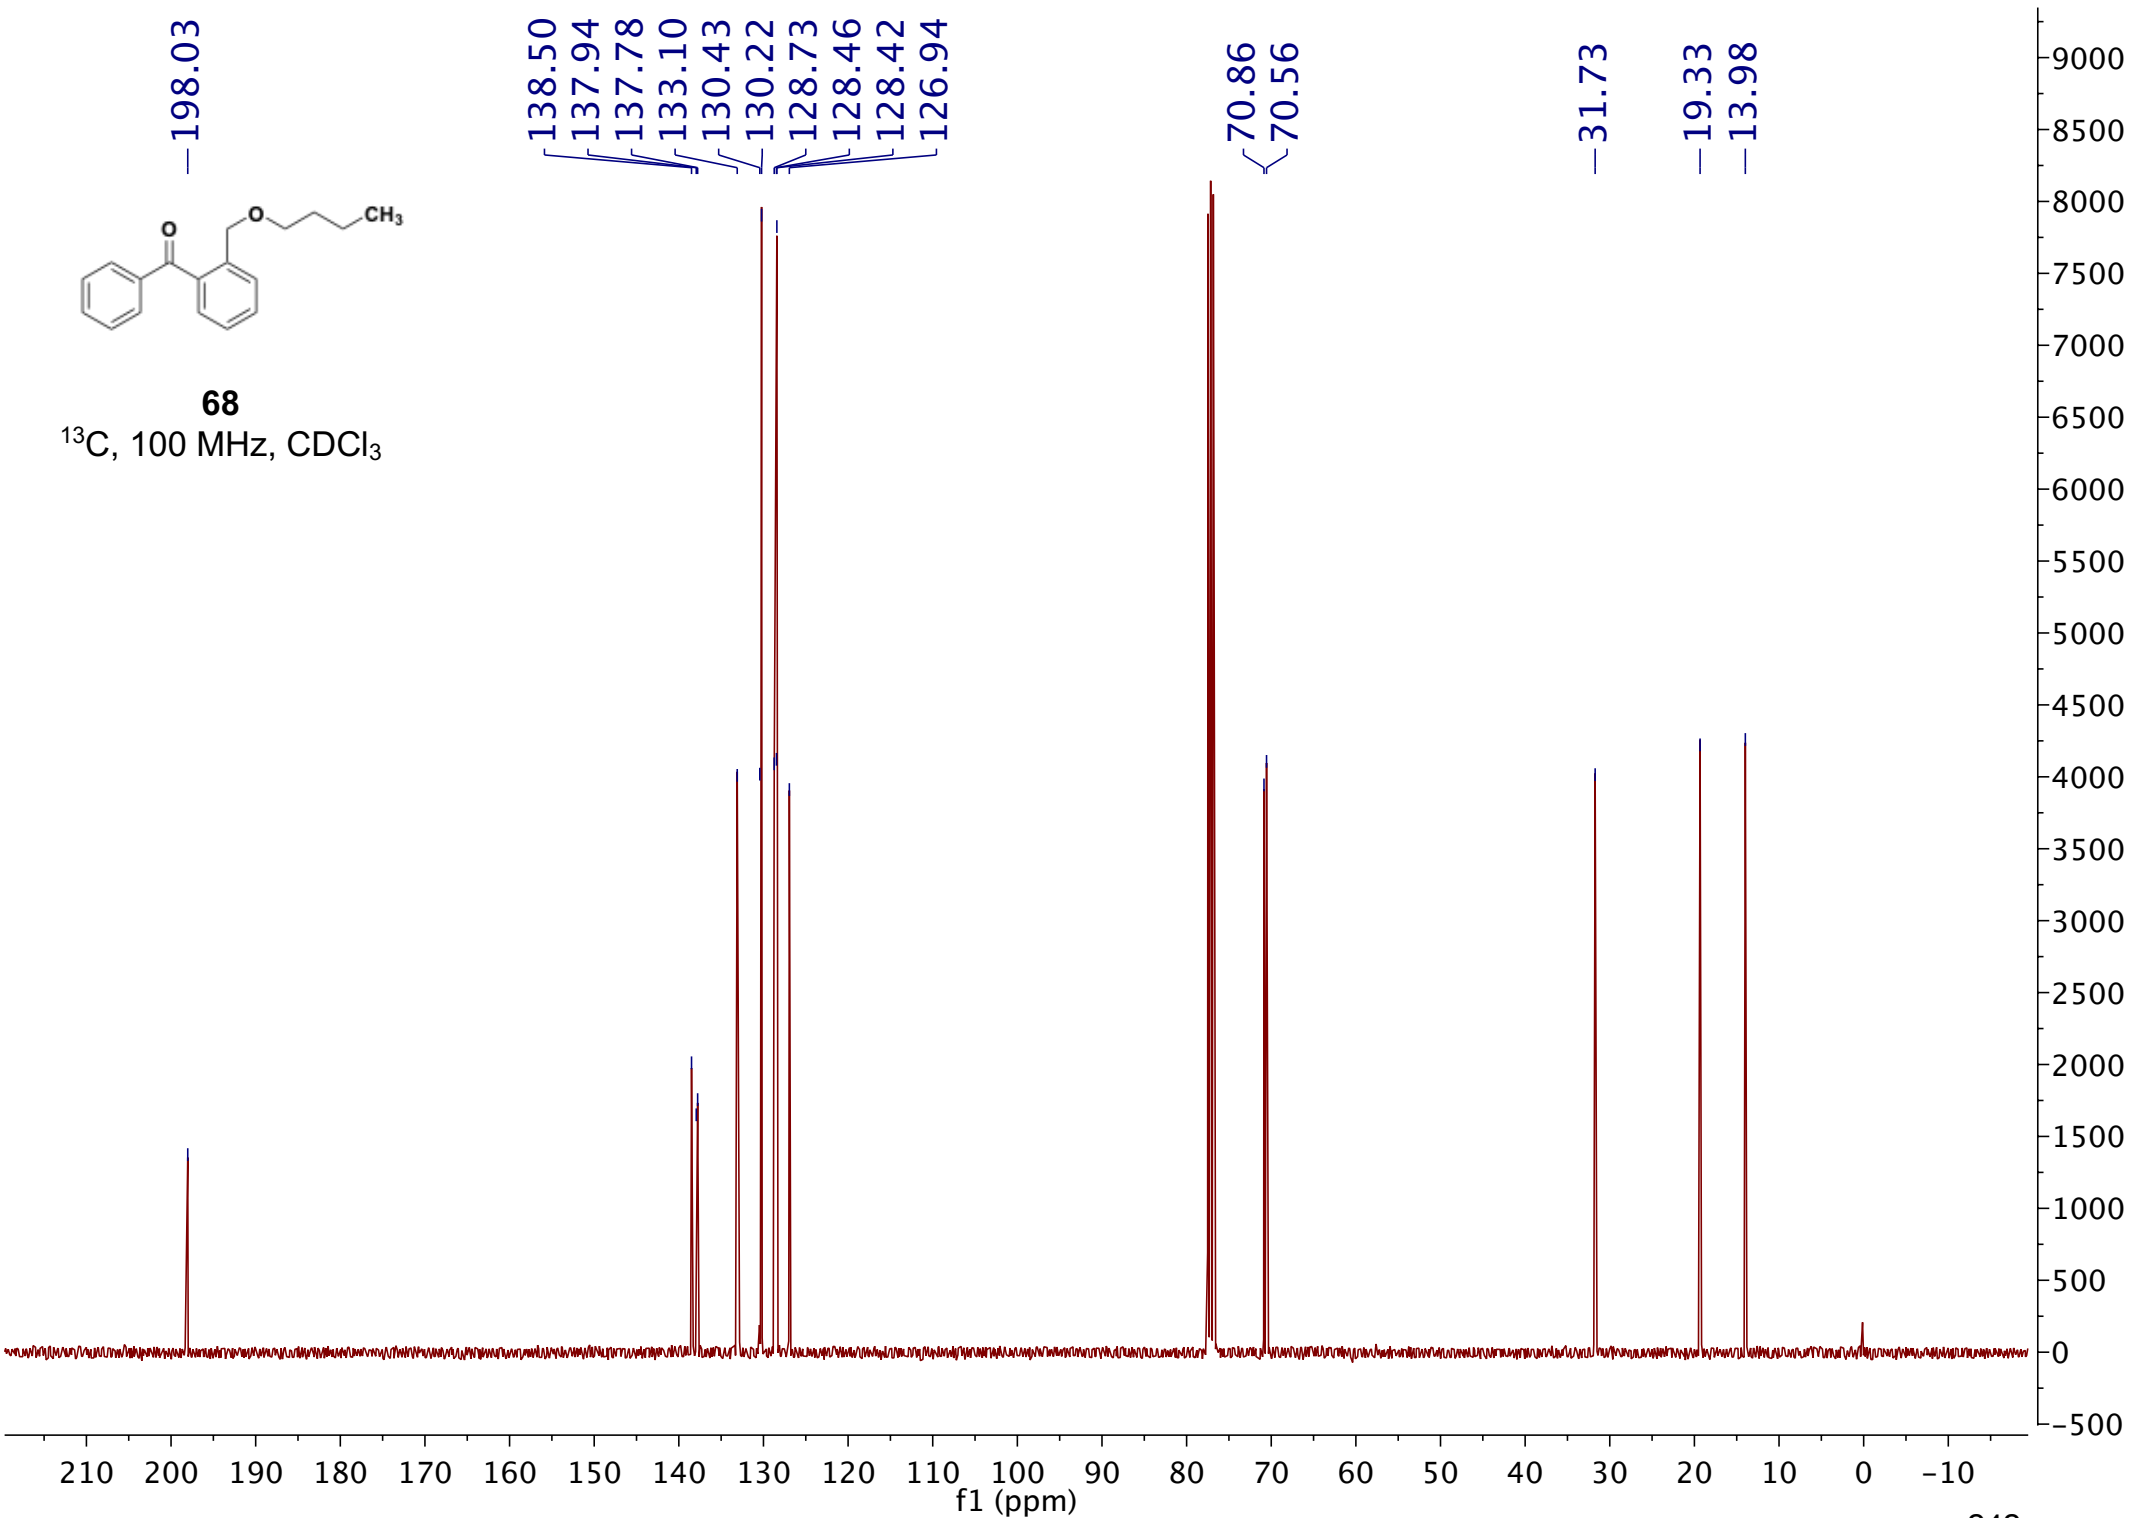



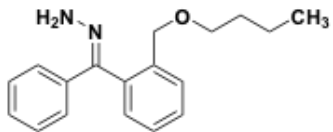

**14d**

$^1\text{H}$ , 400 MHz,  $\text{CDCl}_3$

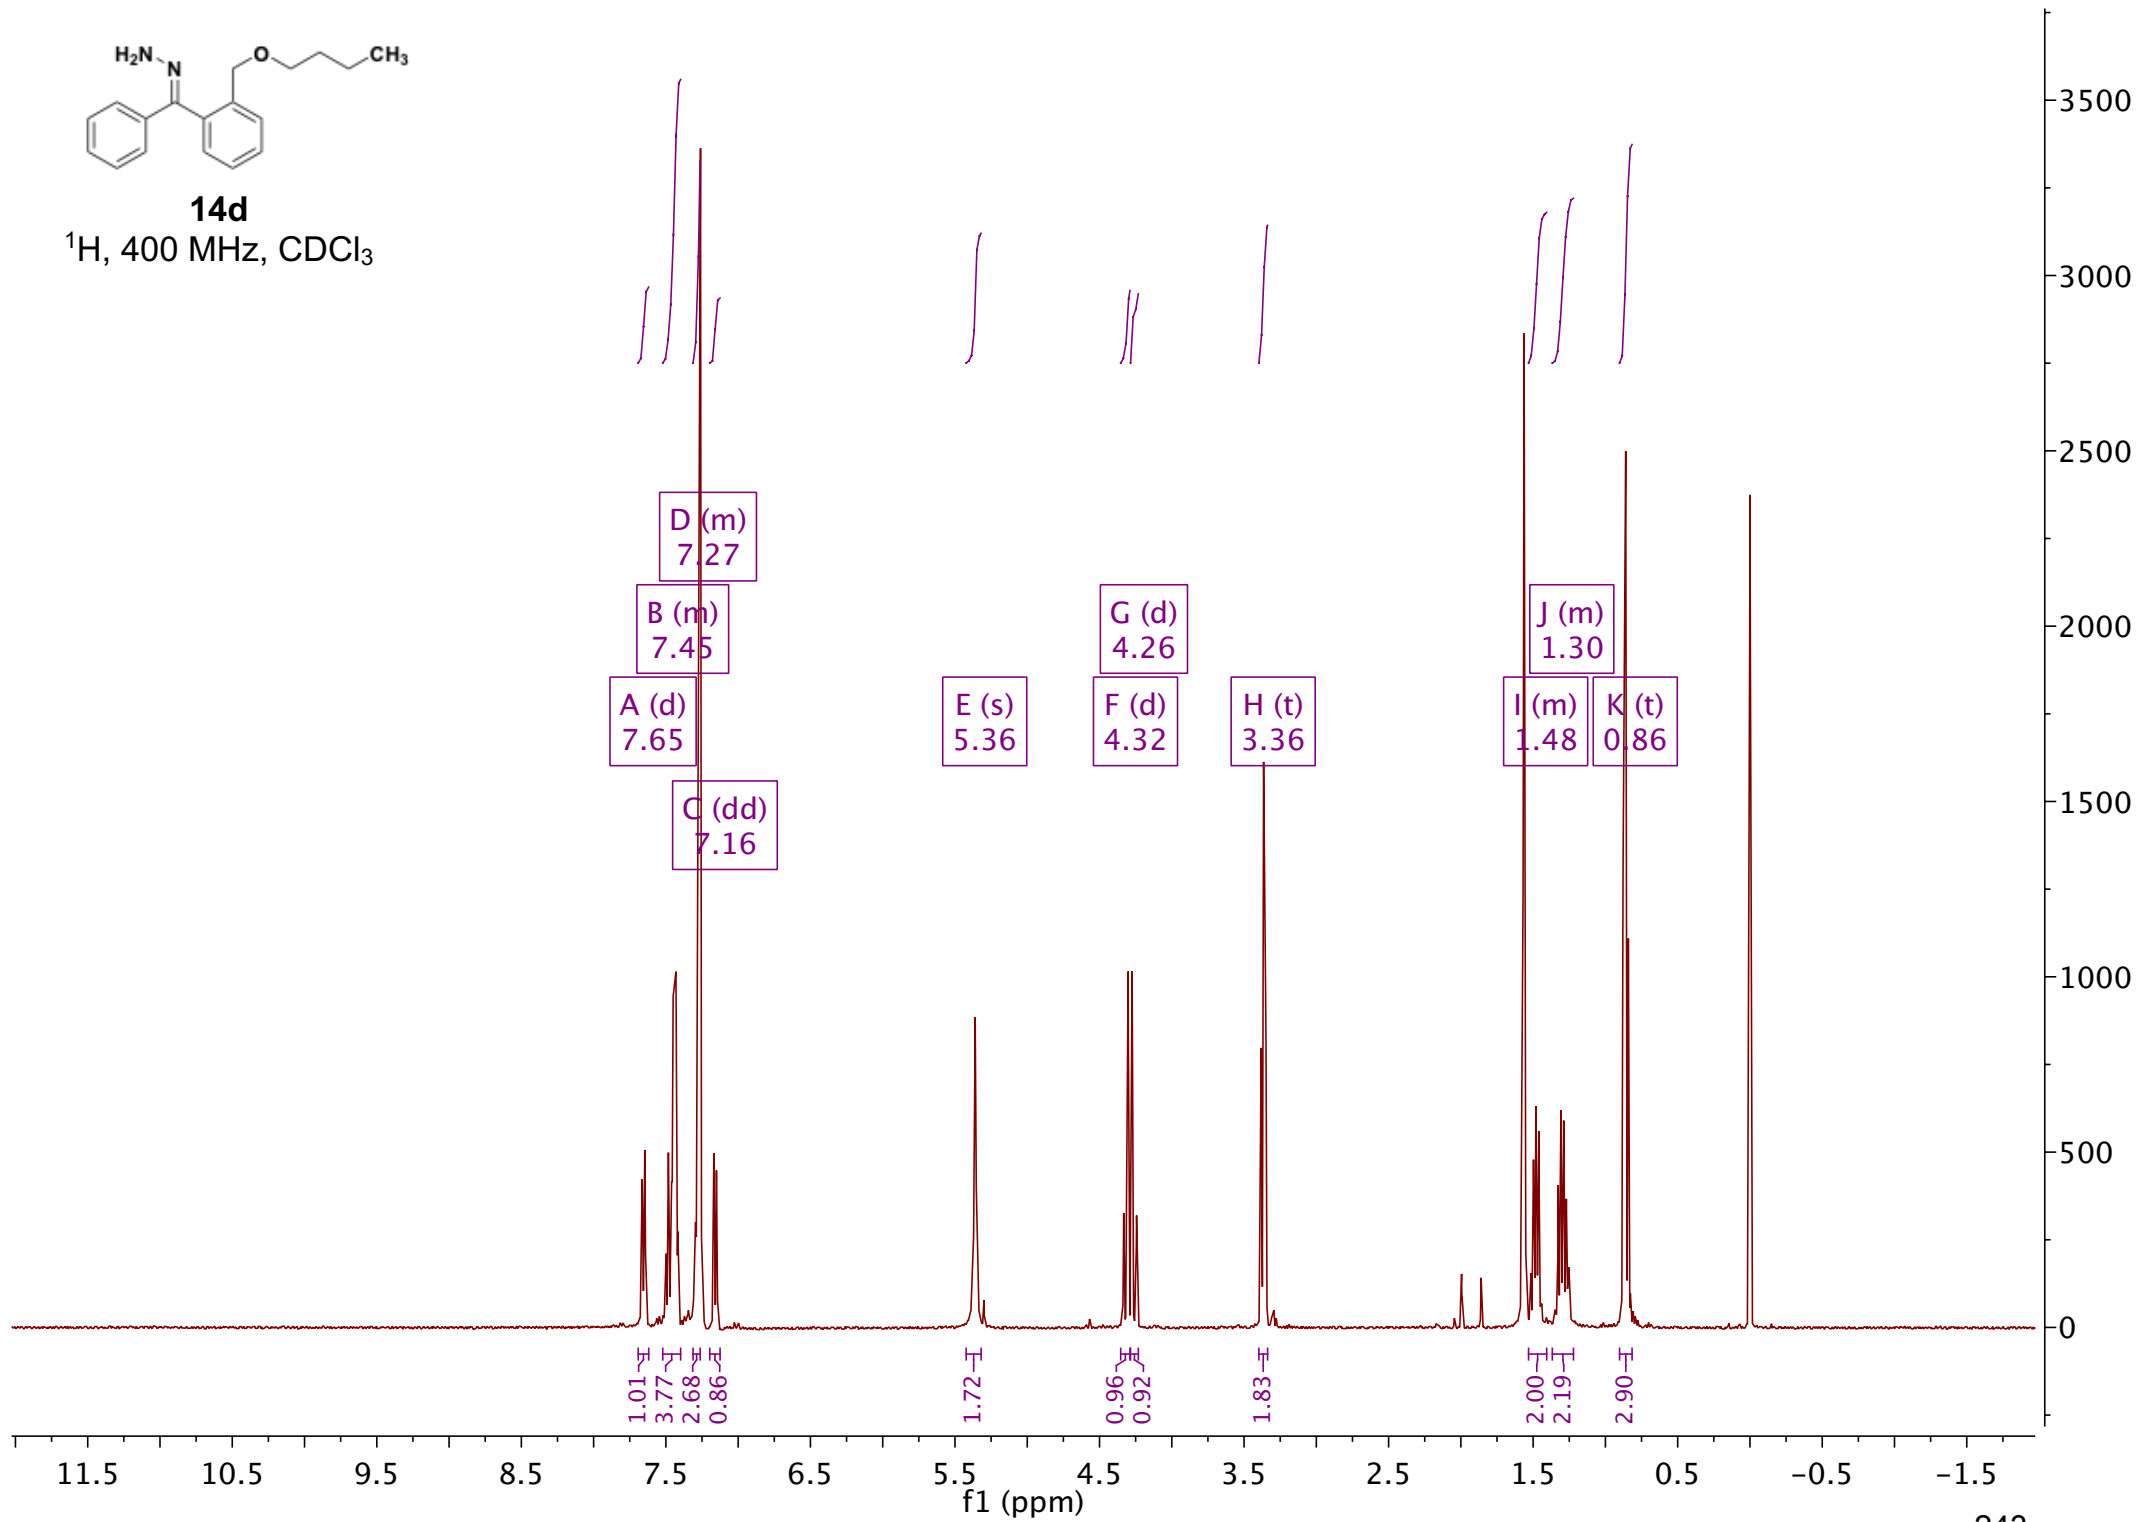

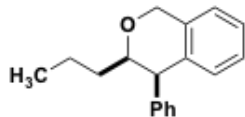

**15d**

<sup>1</sup>H, 400 MHz, CDCl<sub>3</sub>

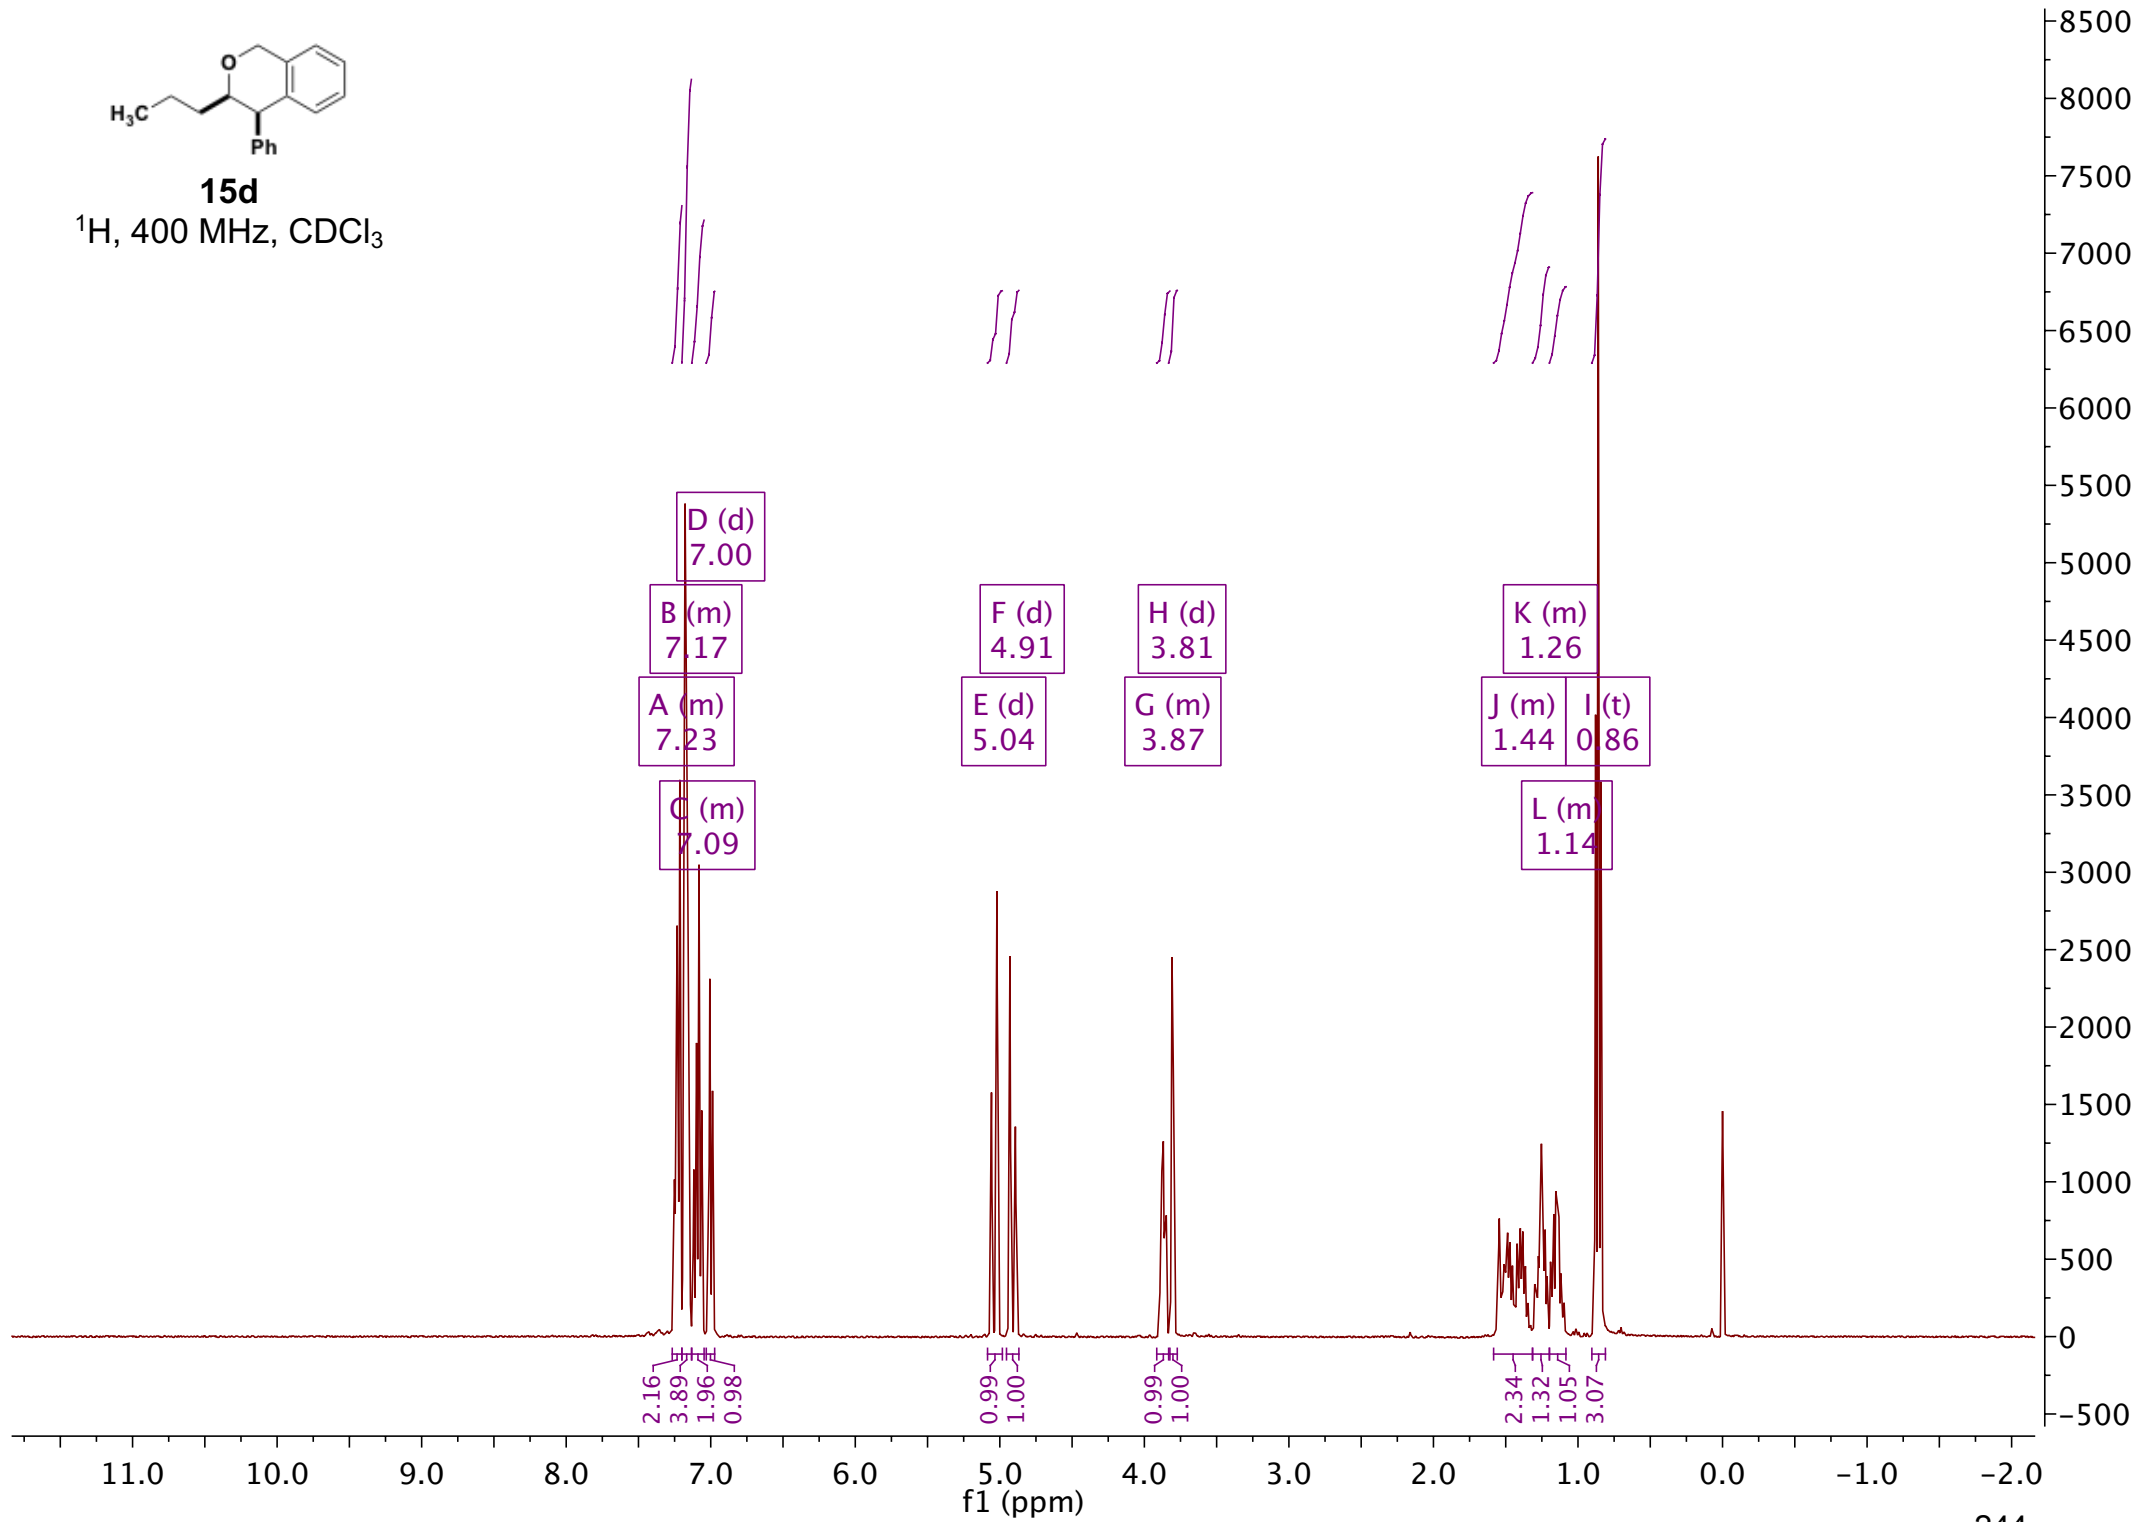

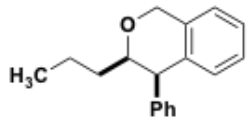

**15d**  
<sup>13</sup>C, 100 MHz, CDCl<sub>3</sub>

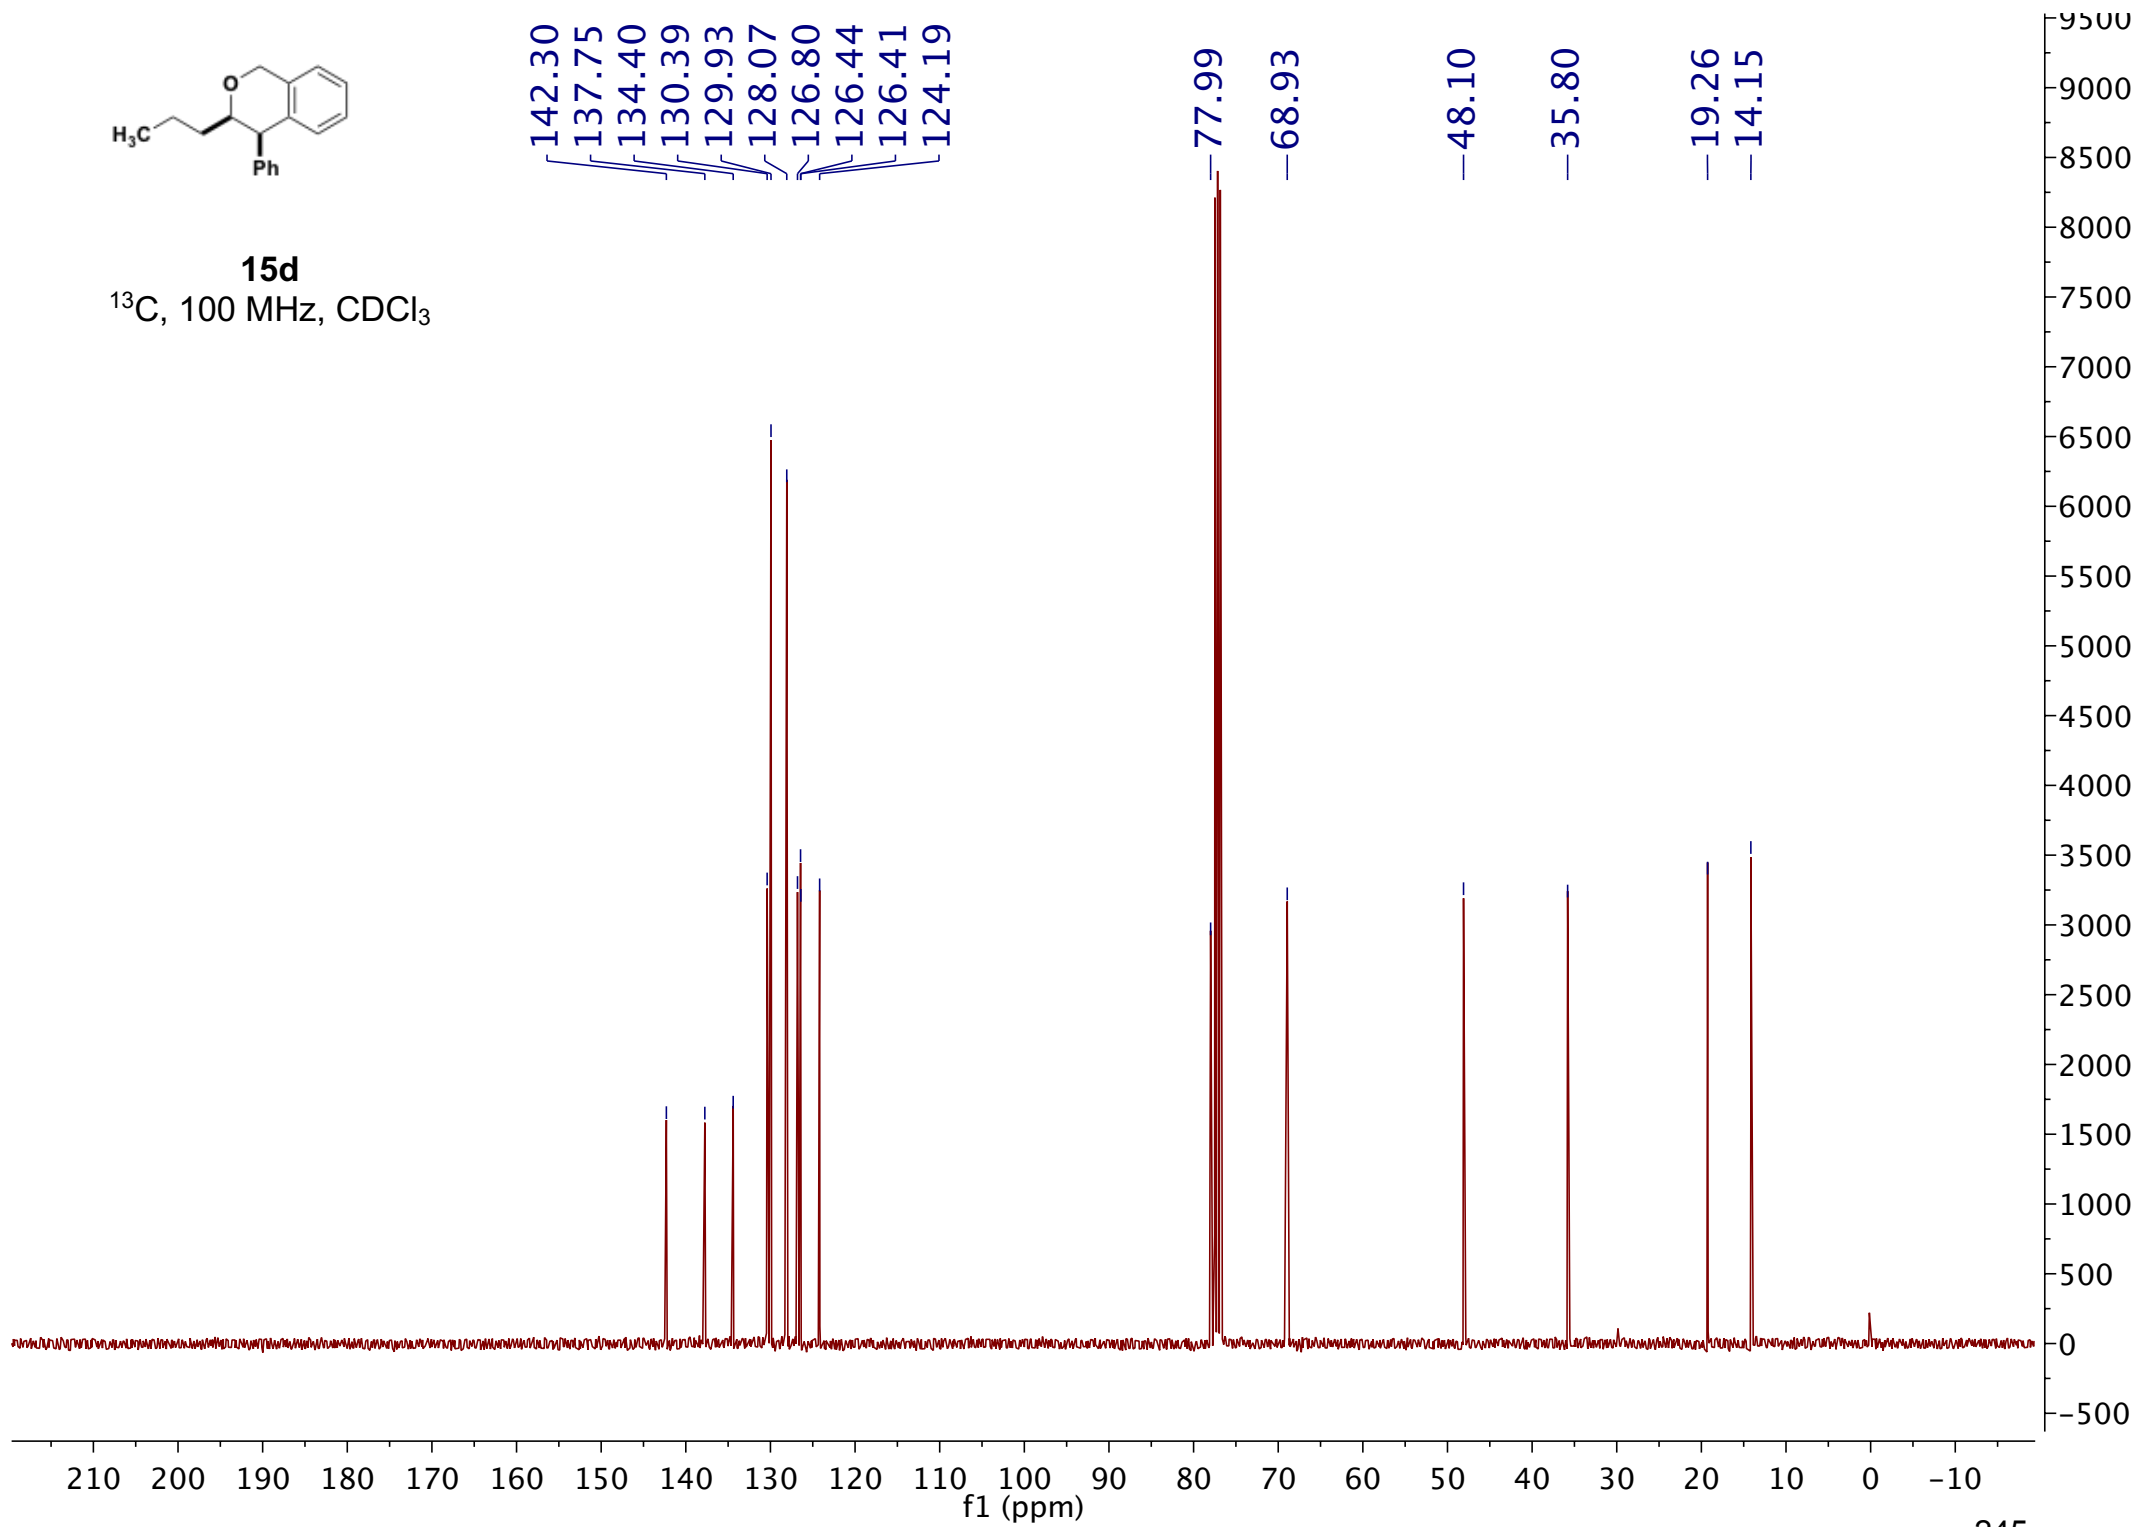

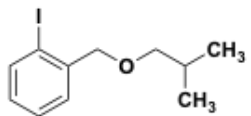

**69**

<sup>1</sup>H, 400 MHz, CDCl<sub>3</sub>

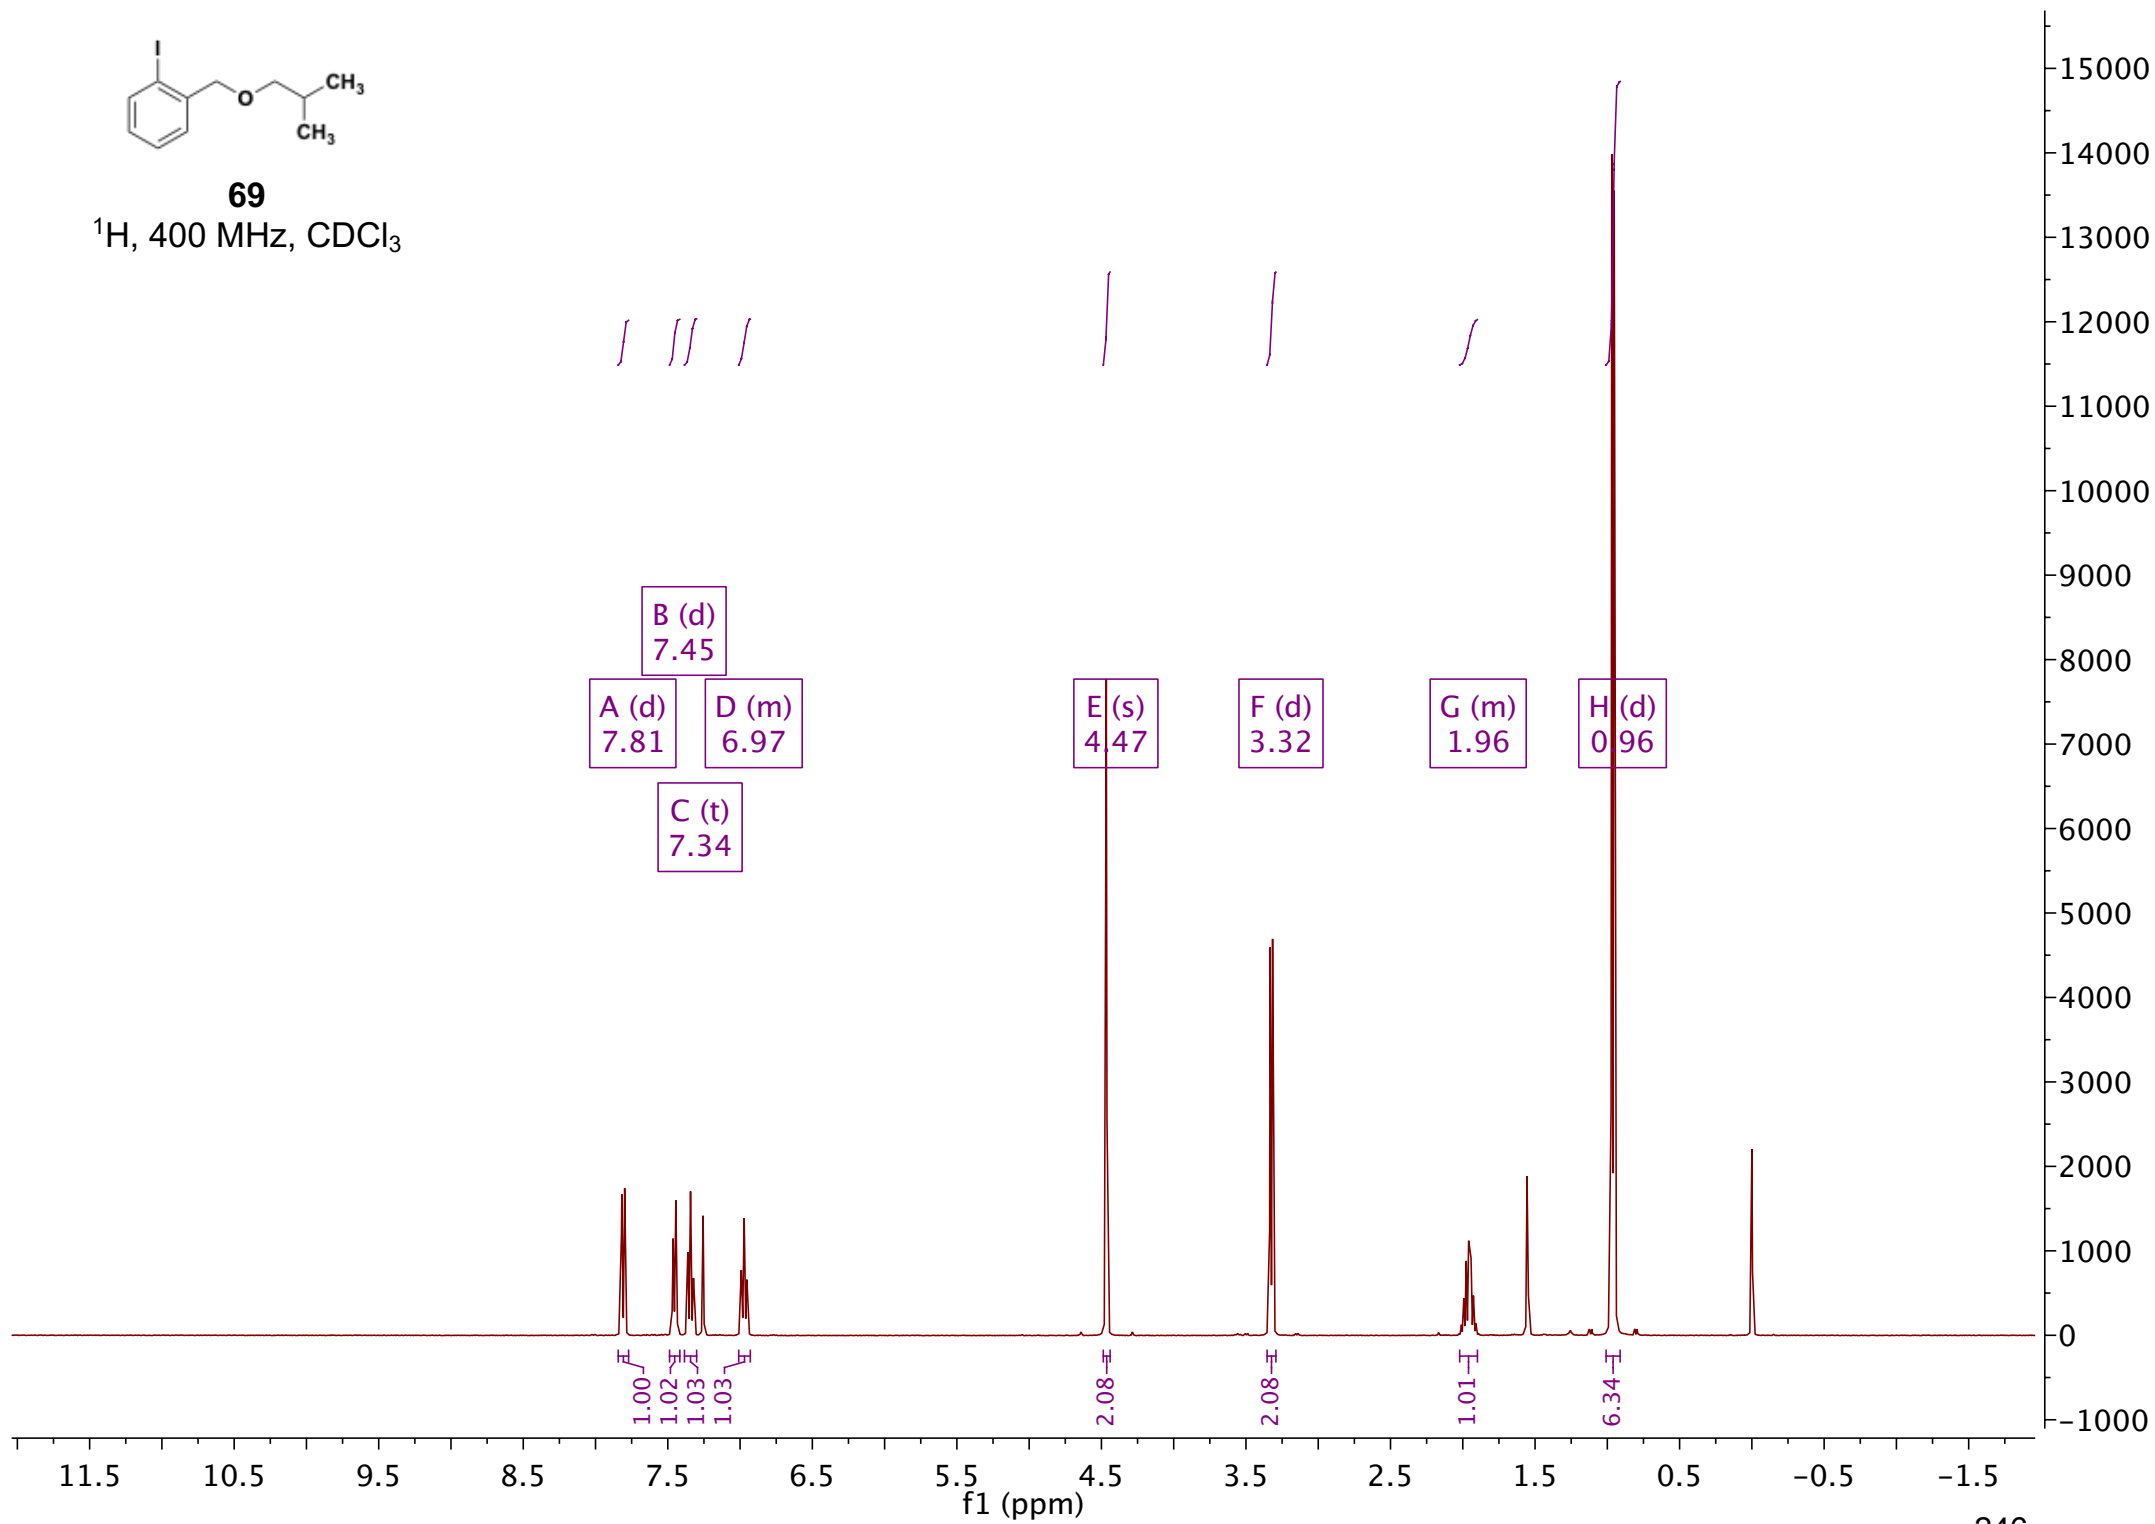

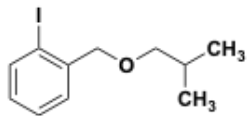

**69**

$^{13}\text{C}$ , 150 MHz,  $(\text{CD}_3)_2\text{CO}$

141.92  
139.85  
129.96  
129.49  
129.04

-97.93

78.12  
77.14

-29.31

19.72

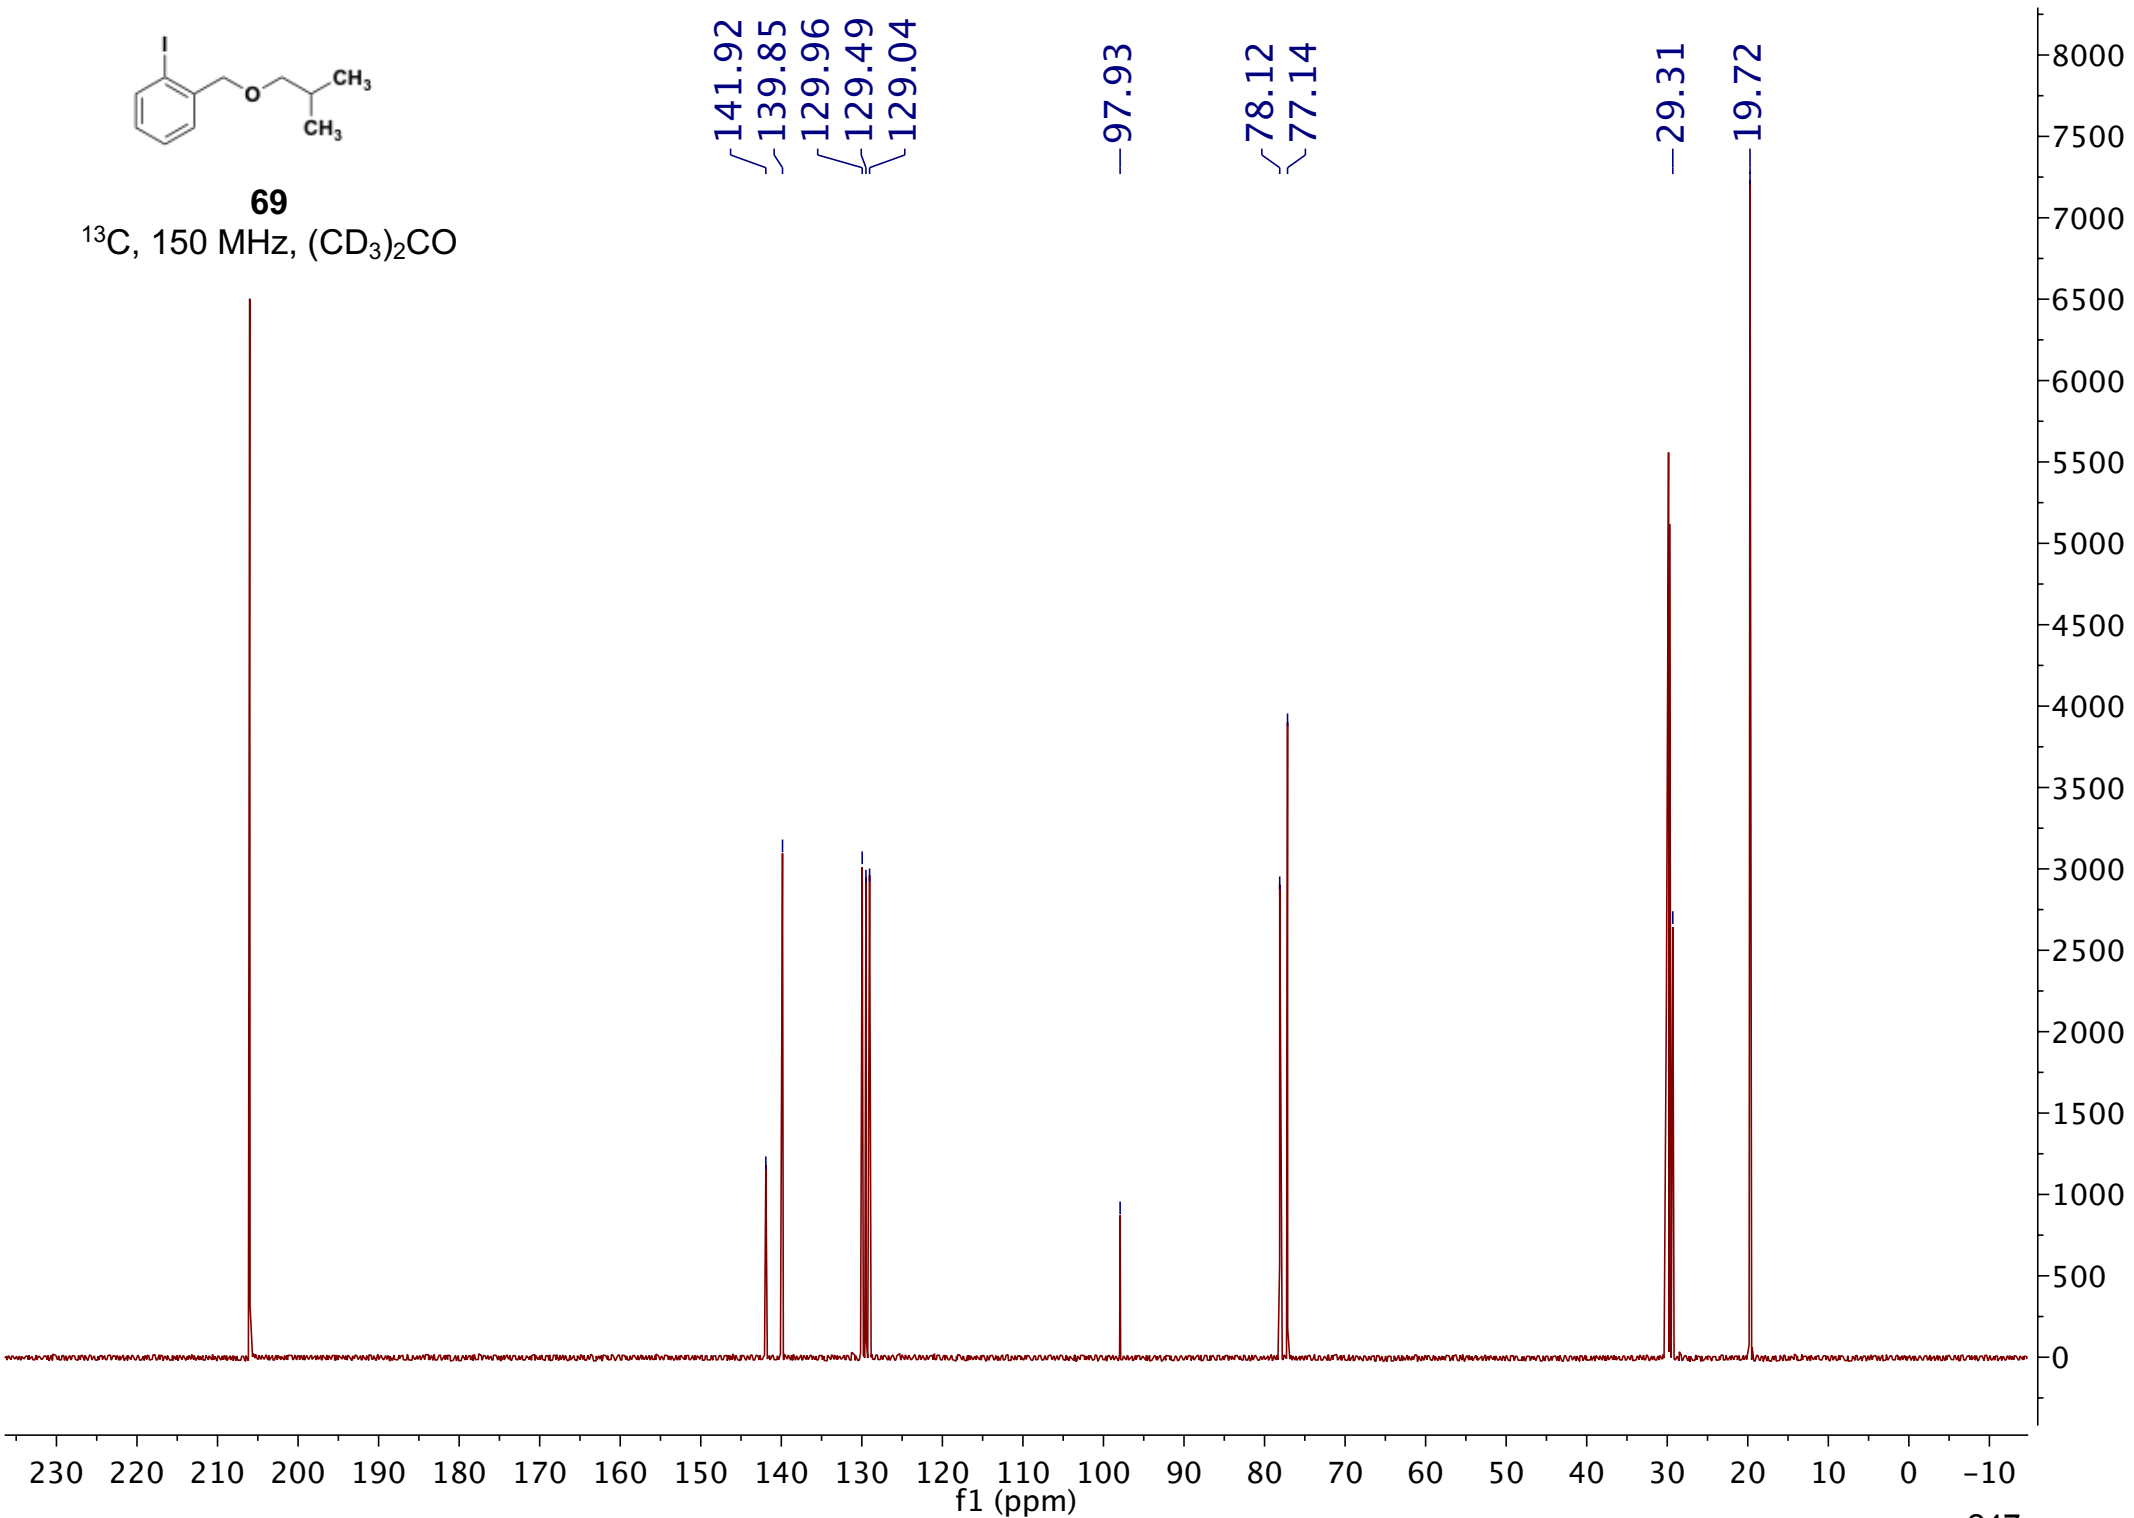

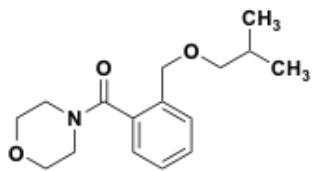

**70**

<sup>1</sup>H, 400 MHz, CDCl<sub>3</sub>

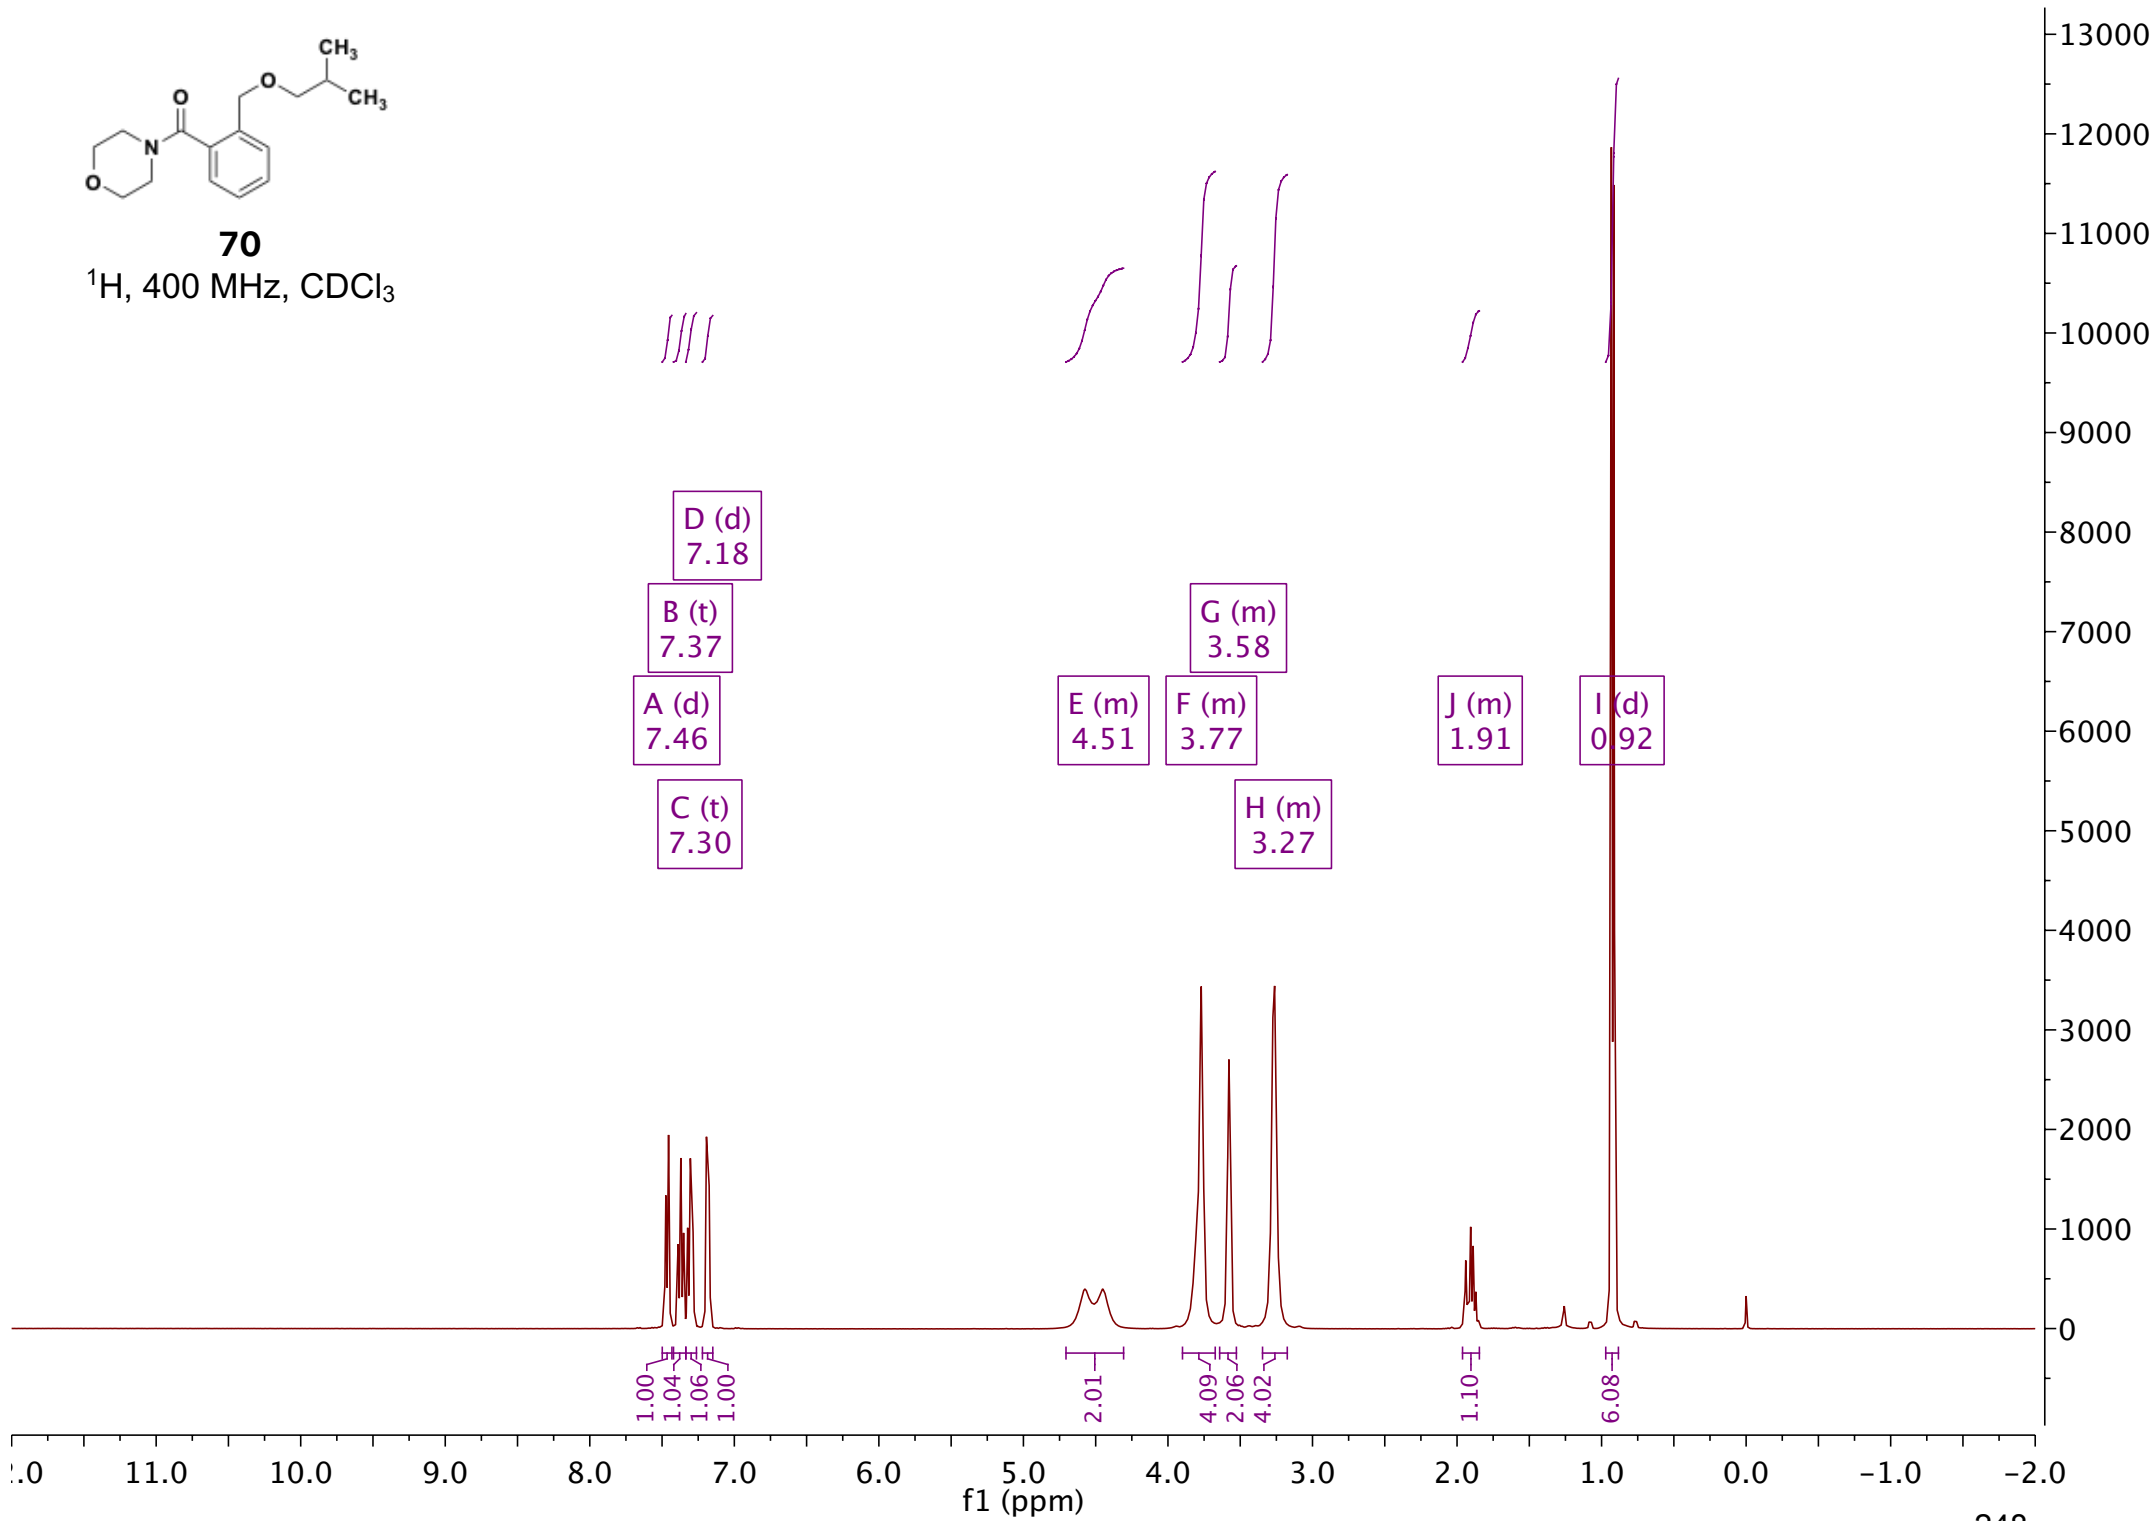

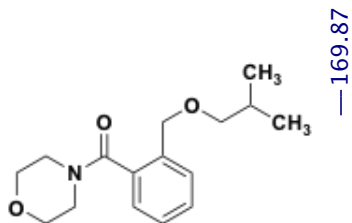

**70**  
 $^{13}\text{C}$ , 100 MHz,  $\text{CDCl}_3$

—169.87

—136.04  
—134.99  
—129.28  
—129.13  
—127.74  
—126.11

—78.33

—70.61

—66.97

—47.78

—42.13

—28.57

—19.56

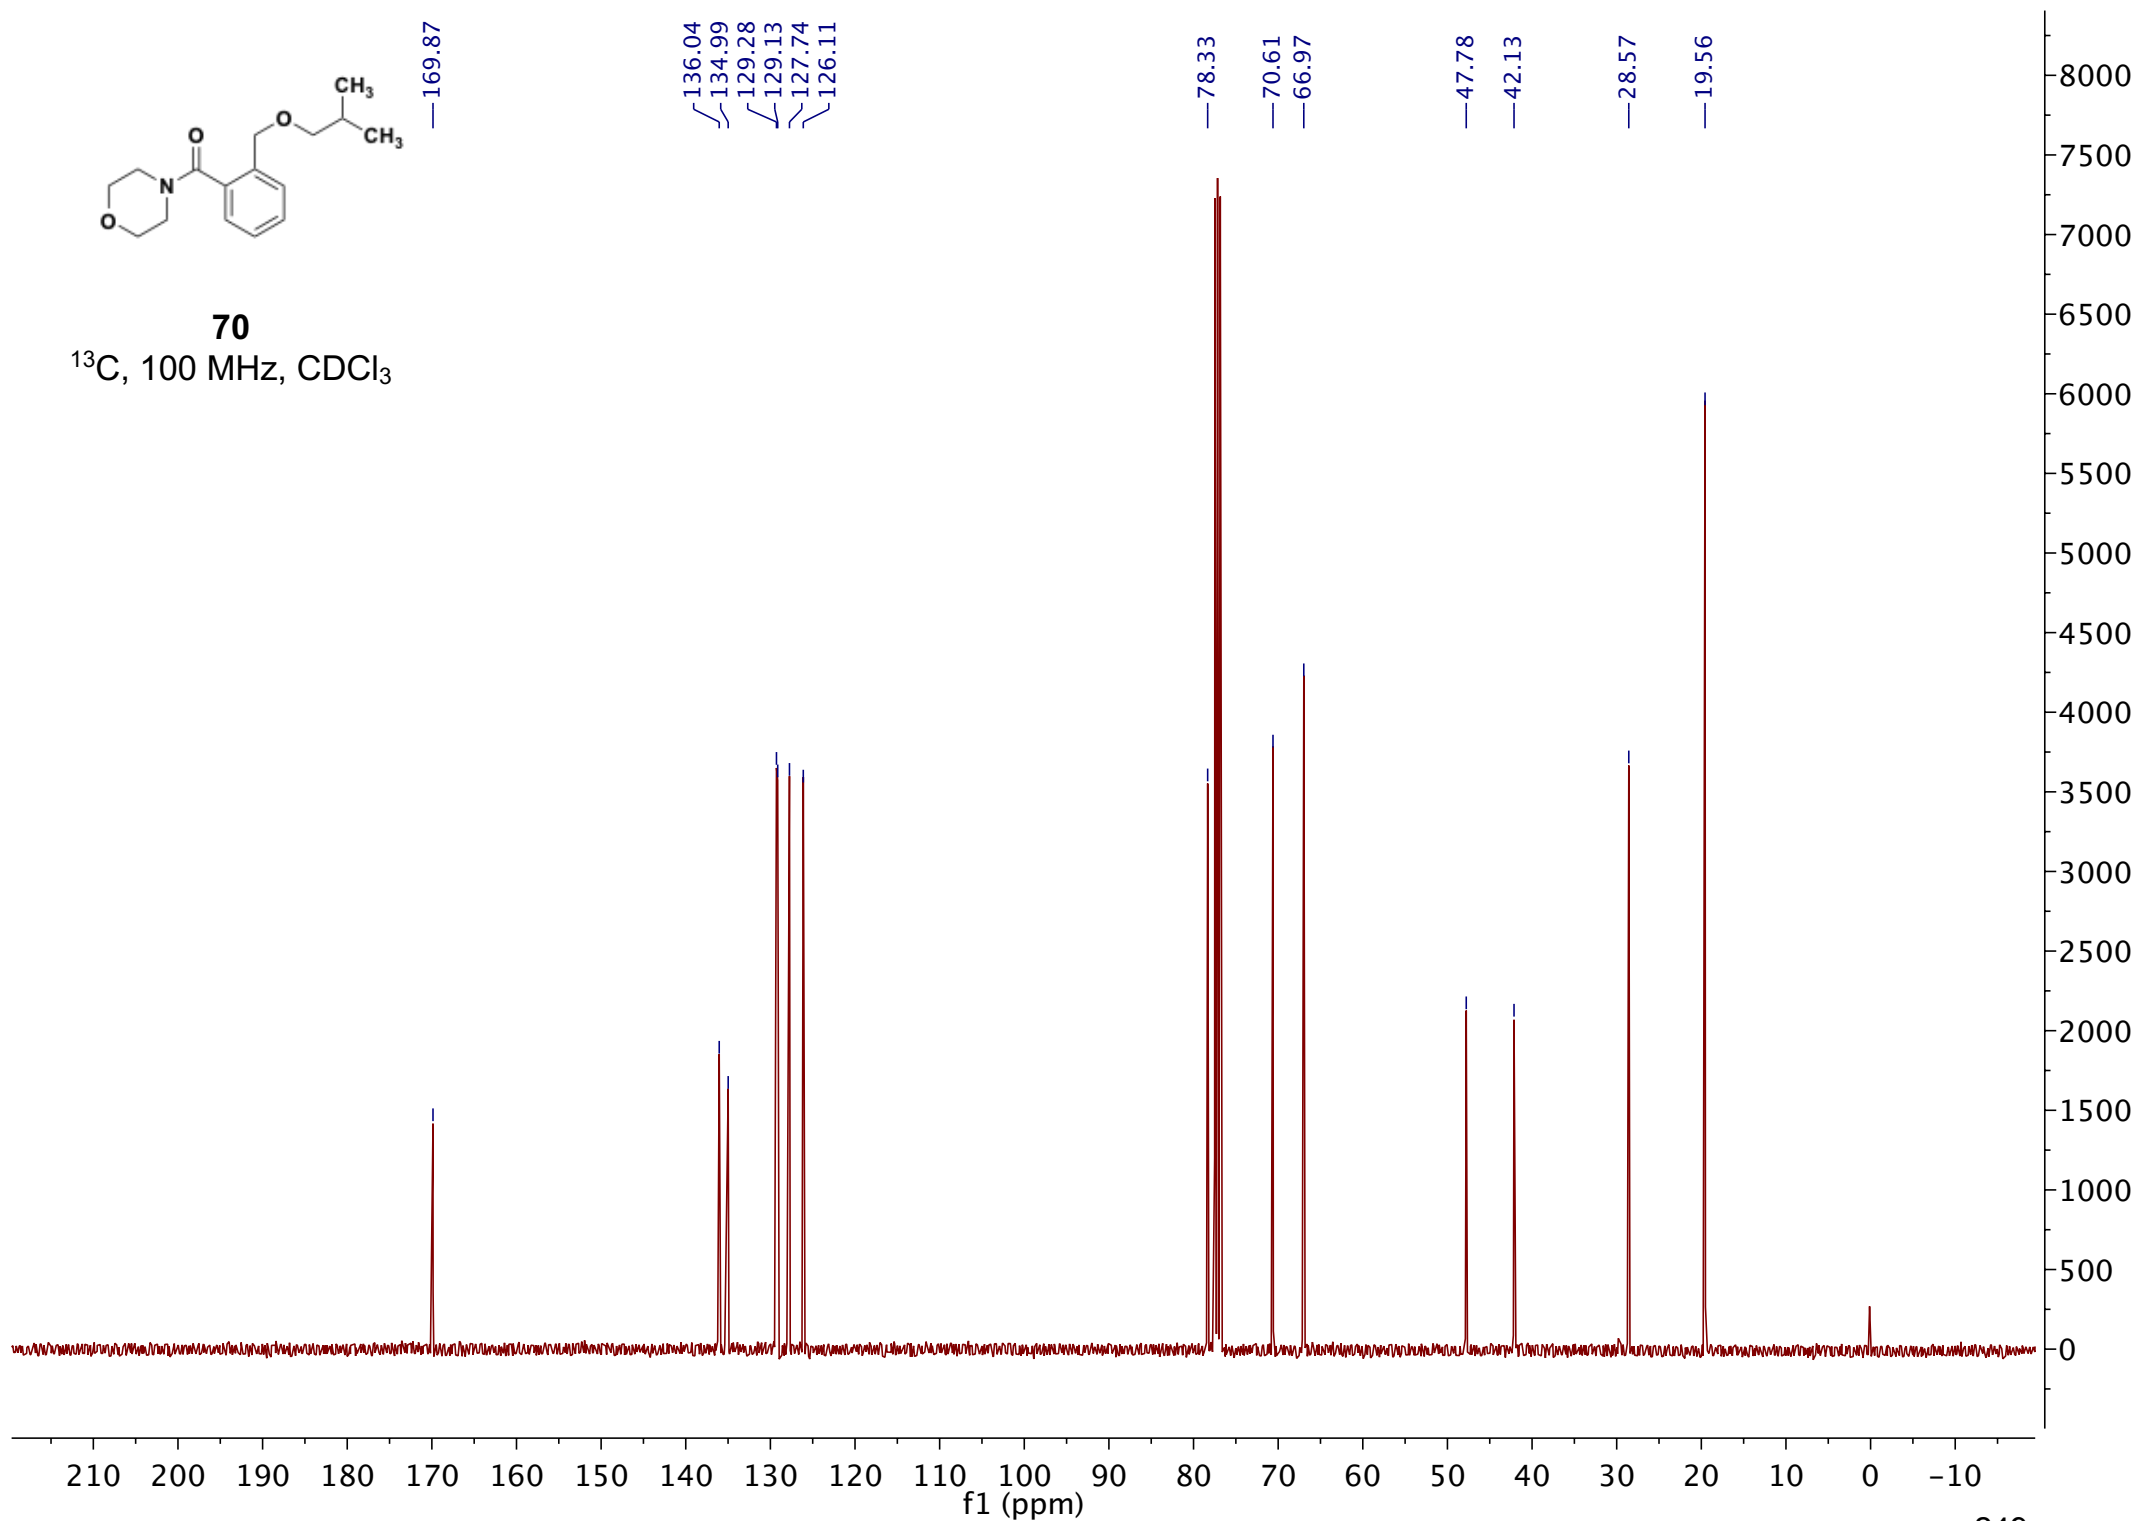

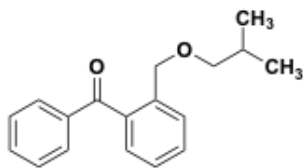

**71**

<sup>1</sup>H, 400 MHz, CDCl<sub>3</sub>

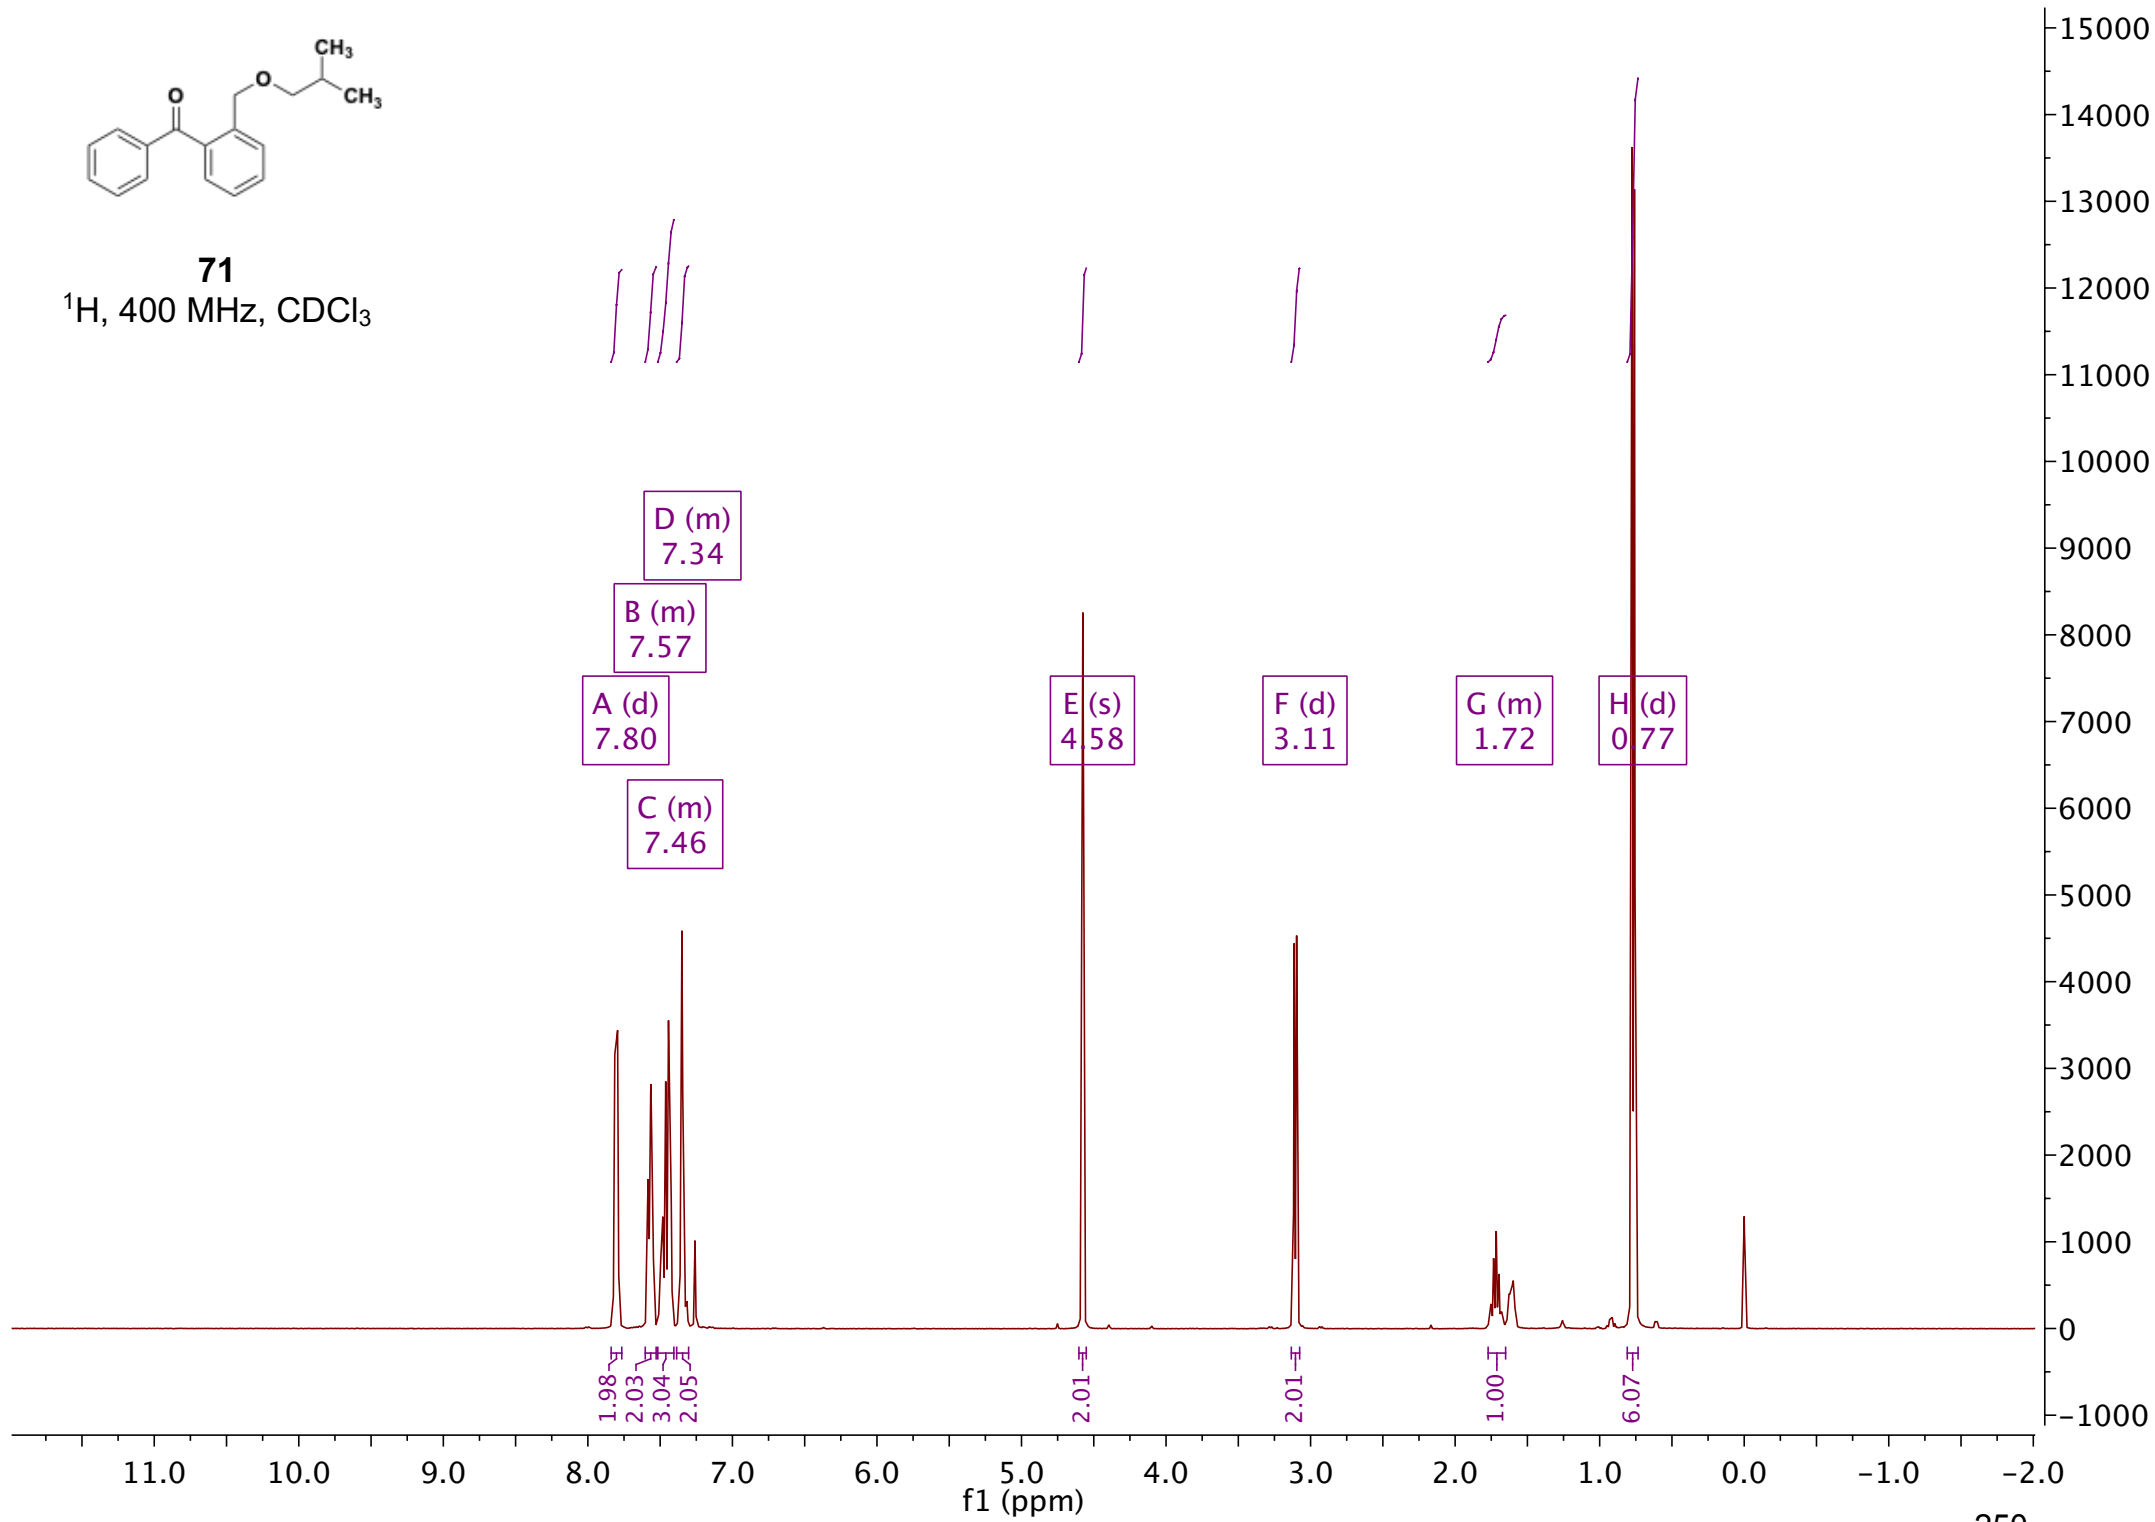



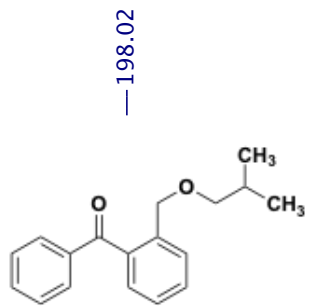

**71**

$^{13}\text{C}$ , 100 MHz,  $\text{CDCl}_3$

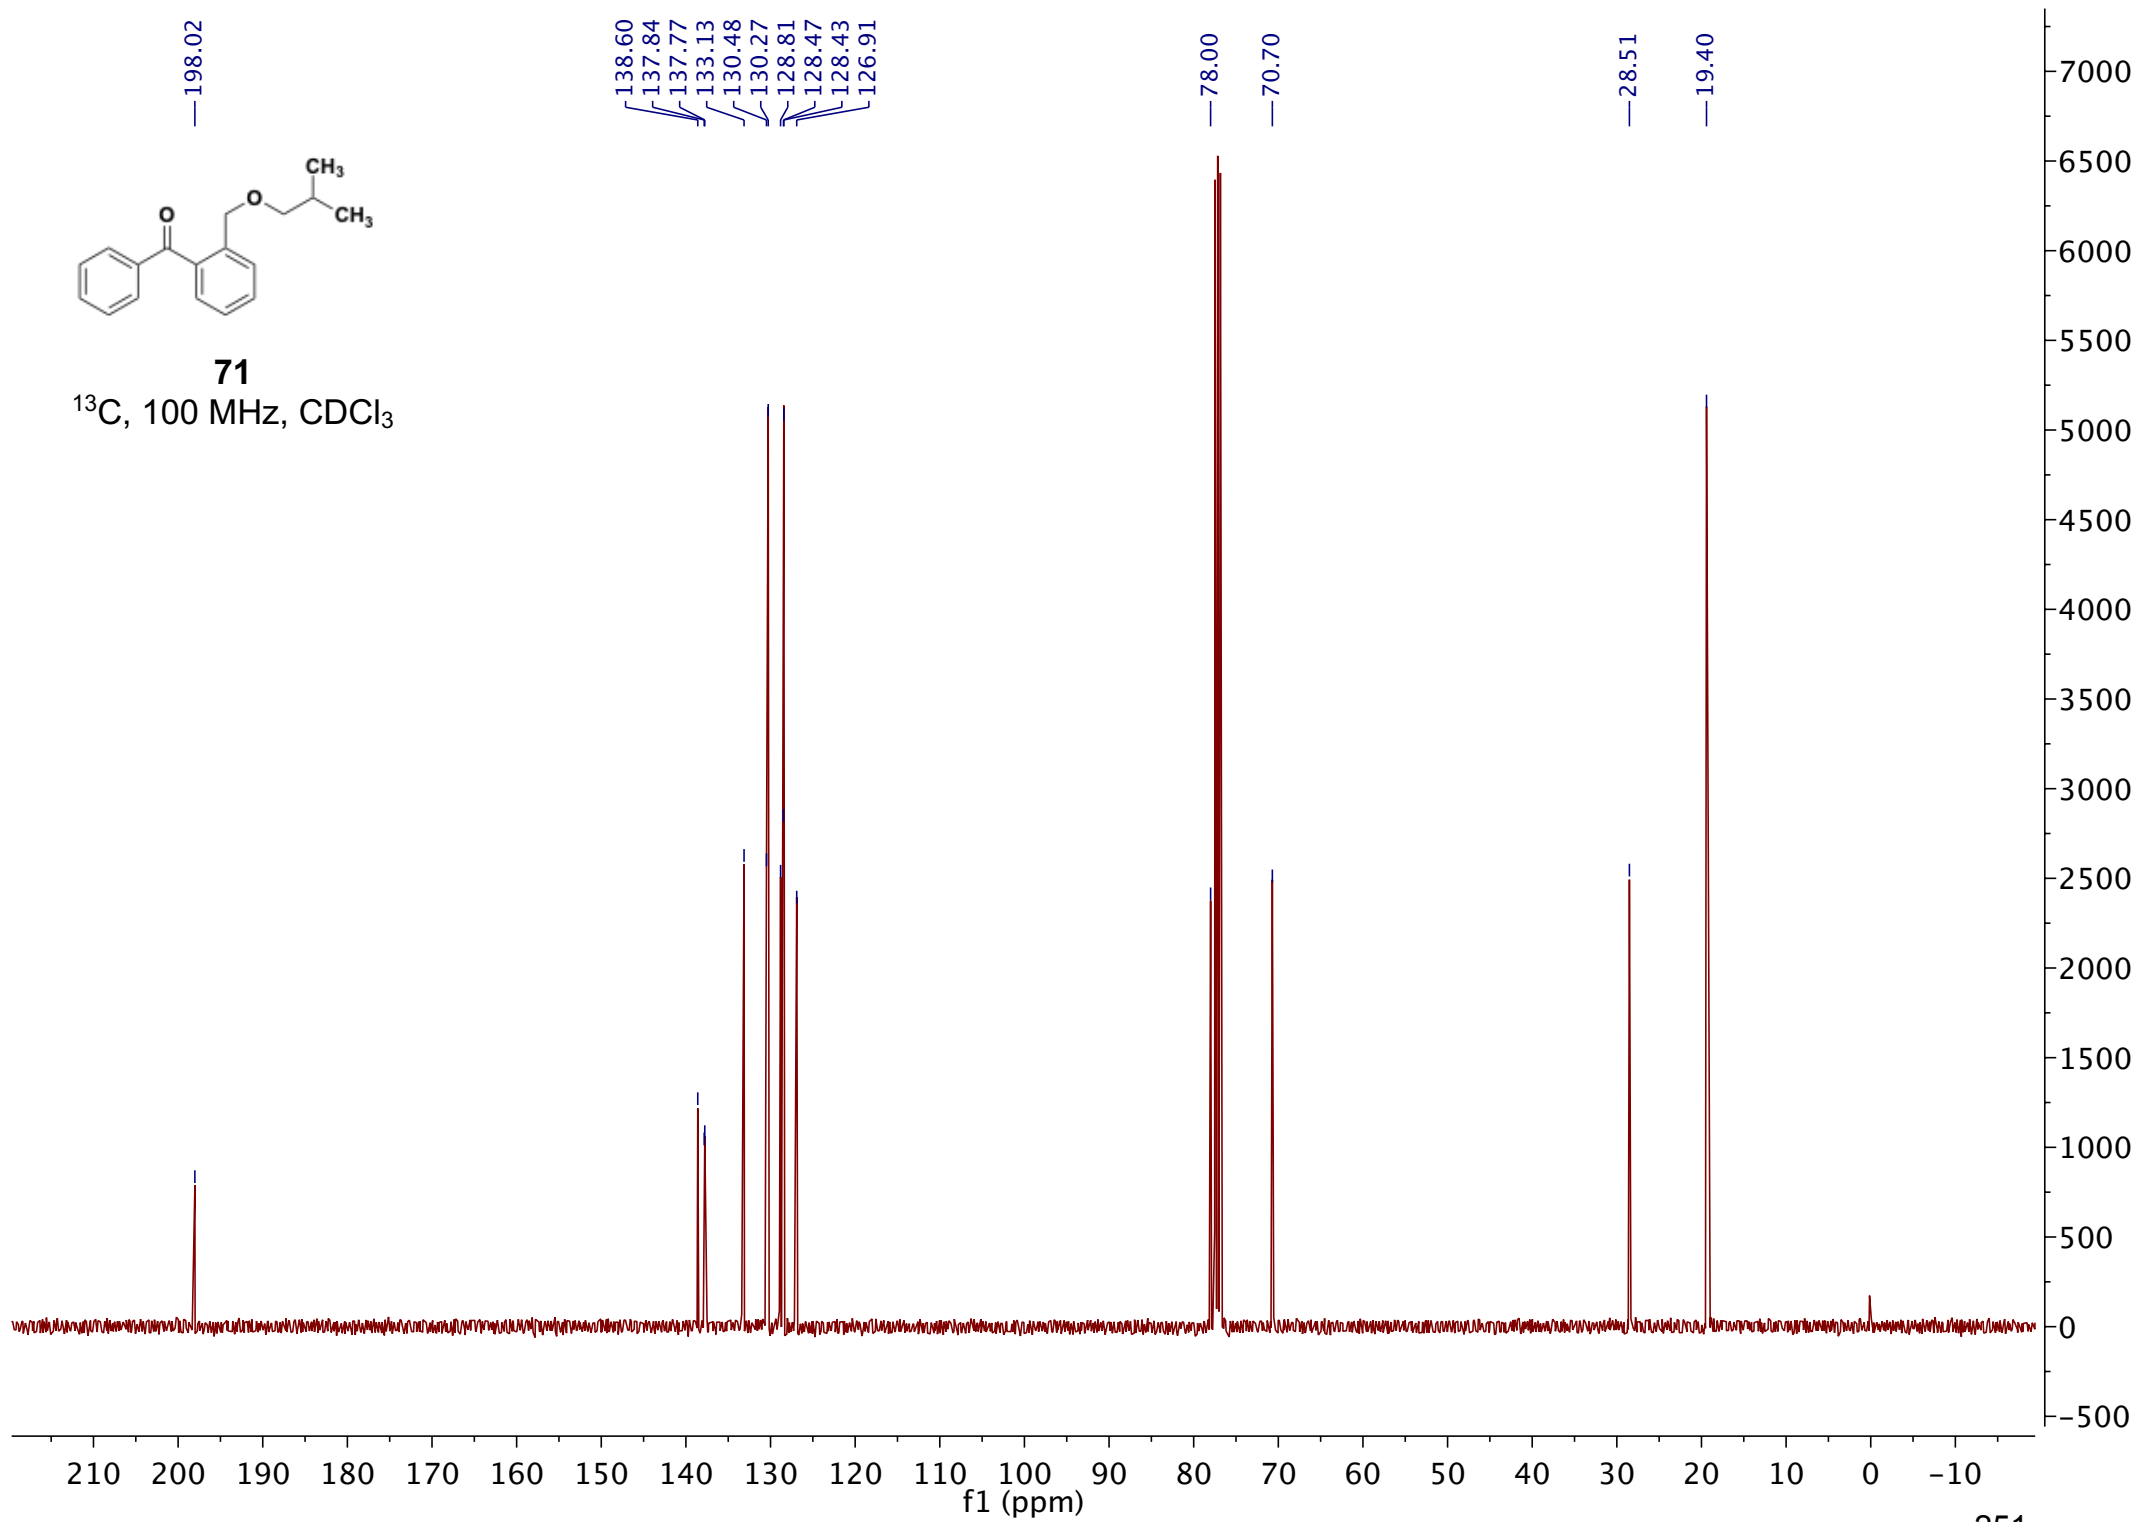

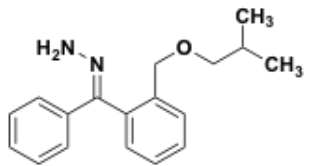

**14e**

<sup>1</sup>H, 400 MHz, CDCl<sub>3</sub>

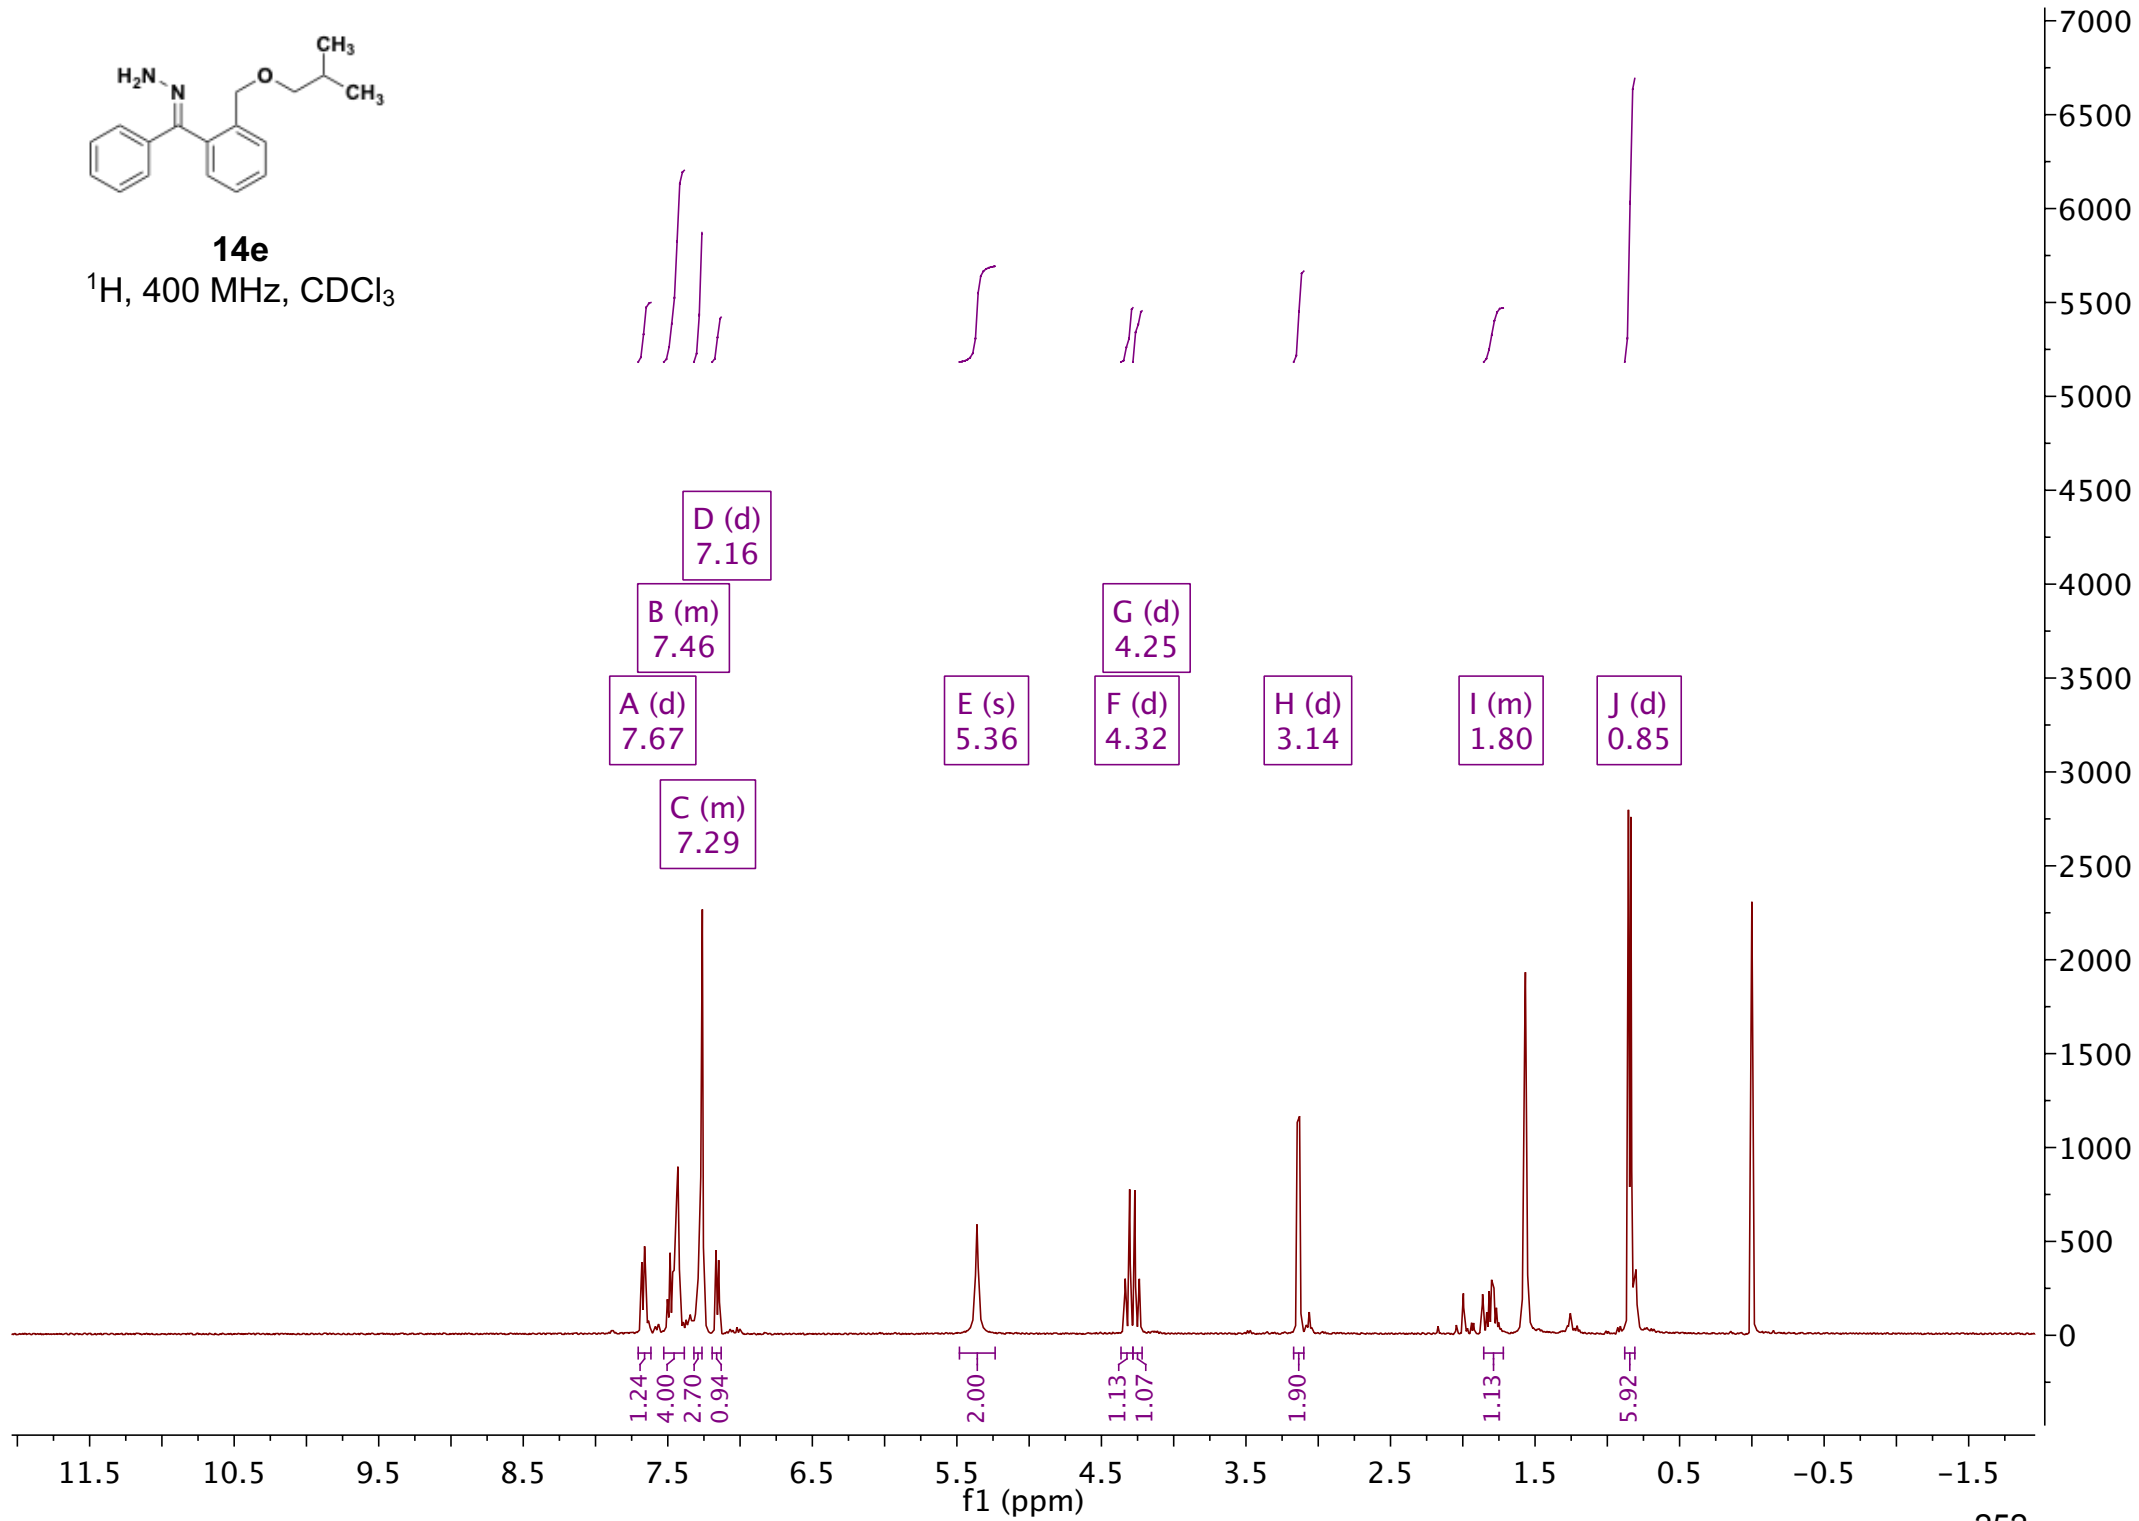

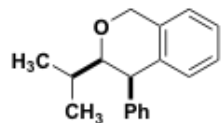

**15e**

<sup>1</sup>H, 400 MHz, CDCl<sub>3</sub>

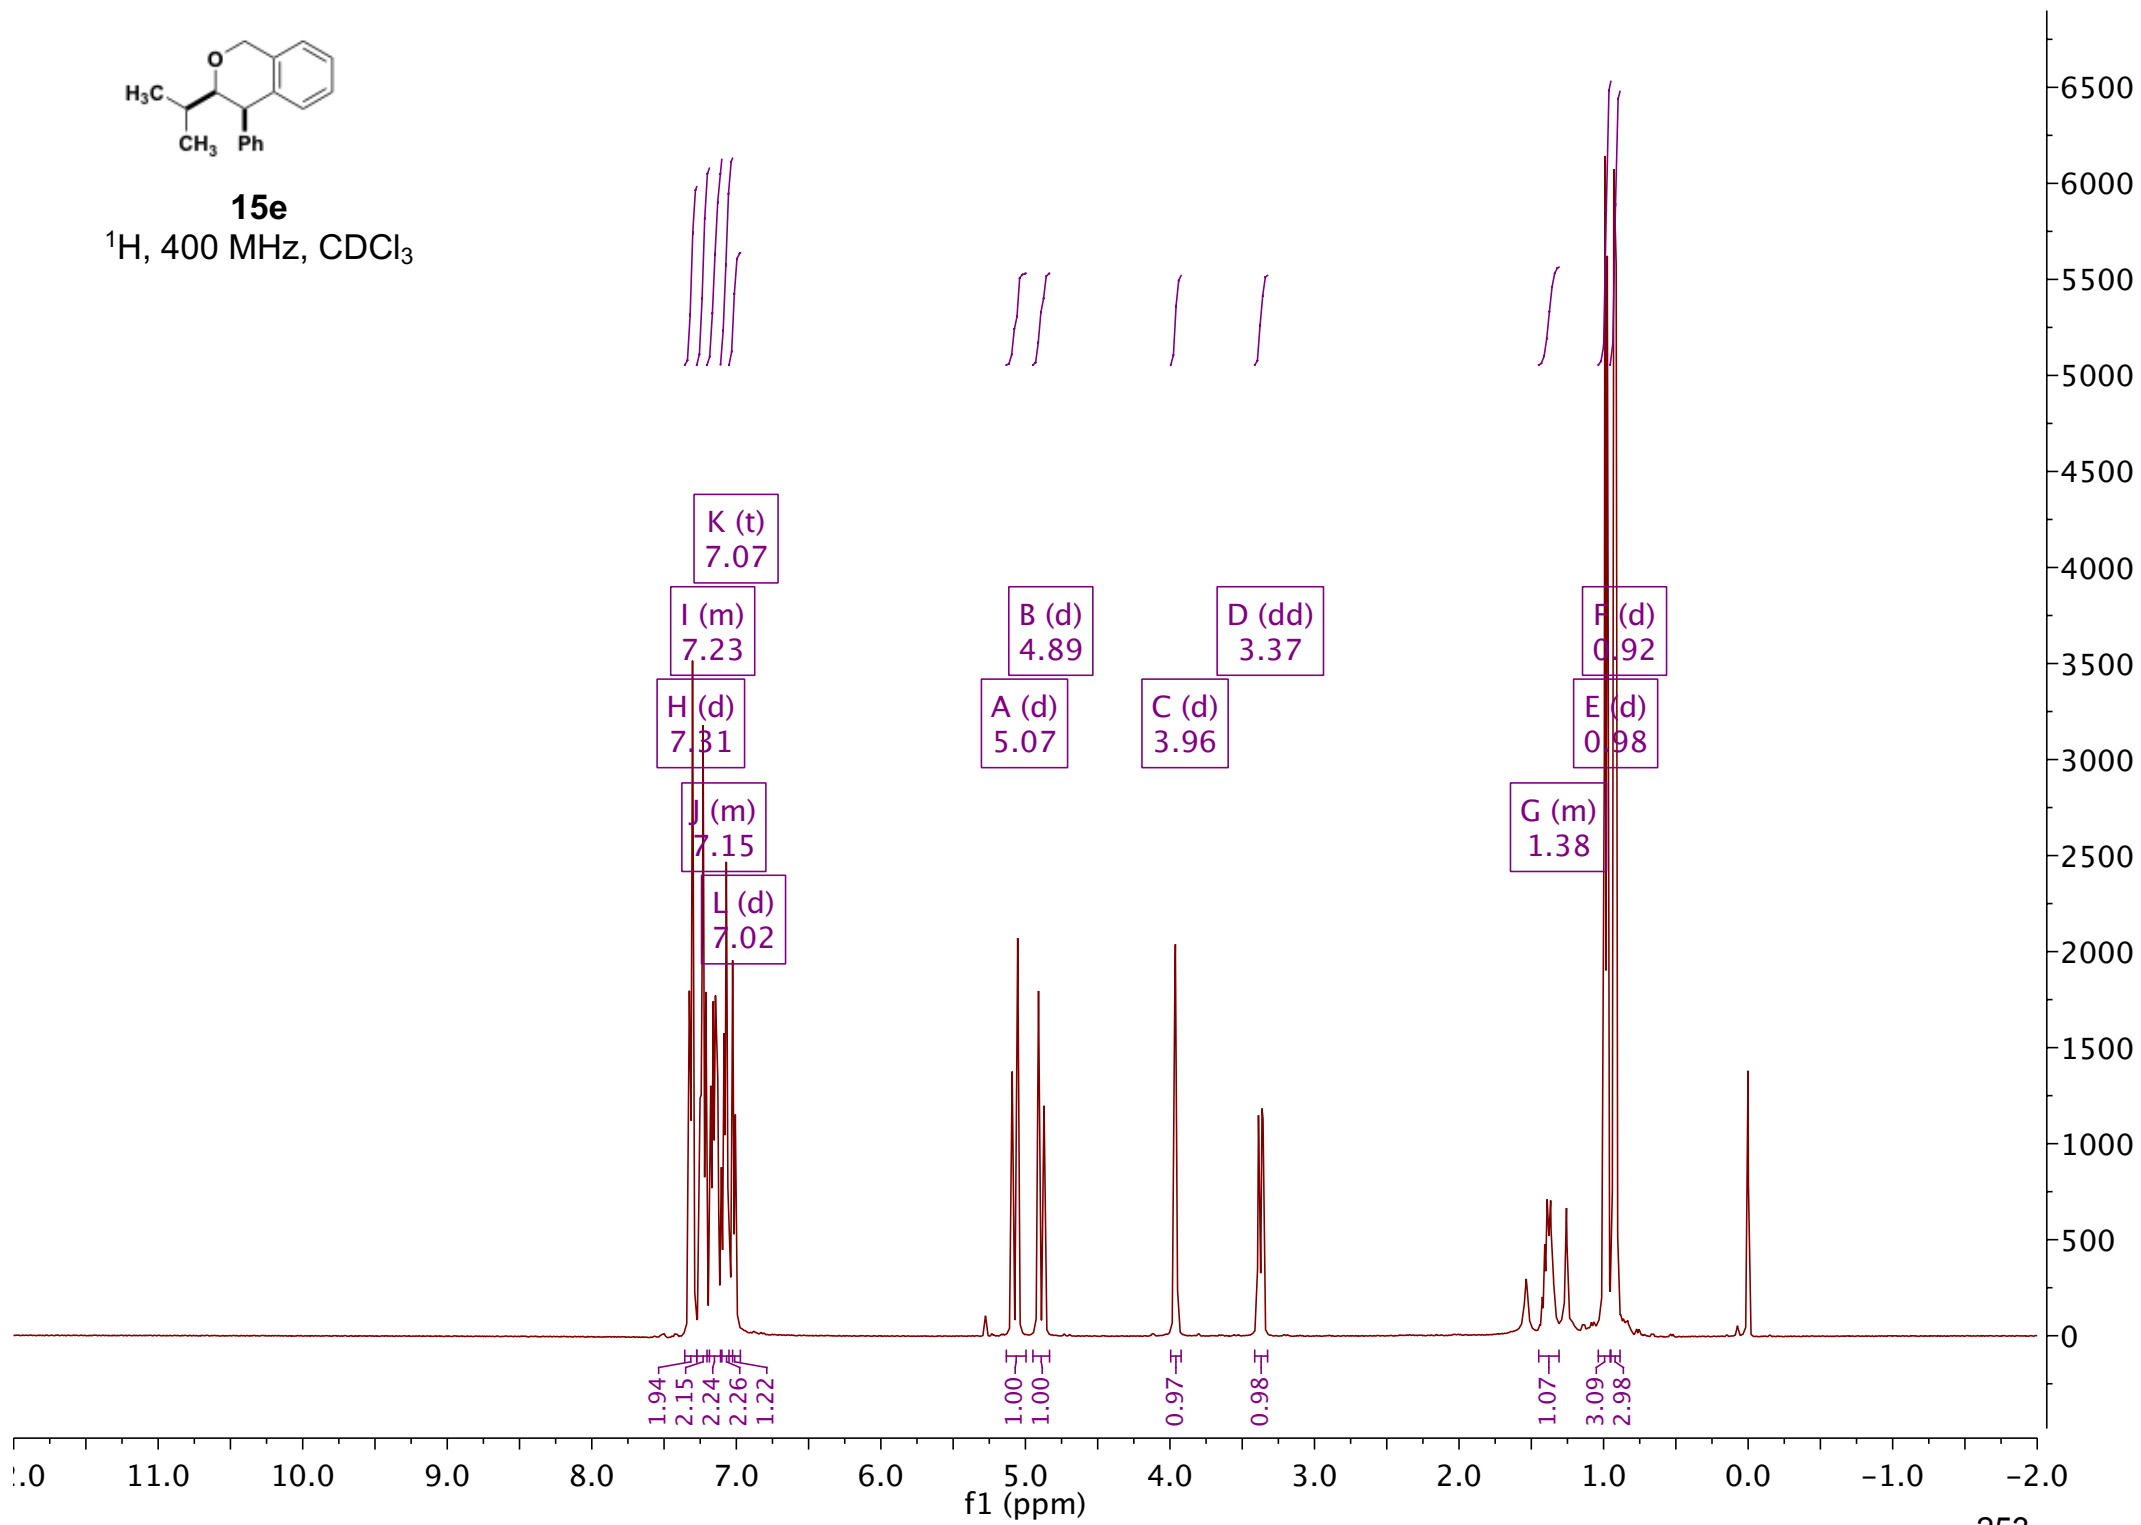

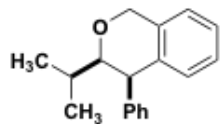

**15e**

$^{13}\text{C}$ , 100 MHz,  $\text{CDCl}_3$

142.53  
138.18  
134.15  
130.33  
129.92  
128.16  
126.75  
126.39  
126.31  
124.23

84.60

69.25

46.00

30.23

19.75

18.80

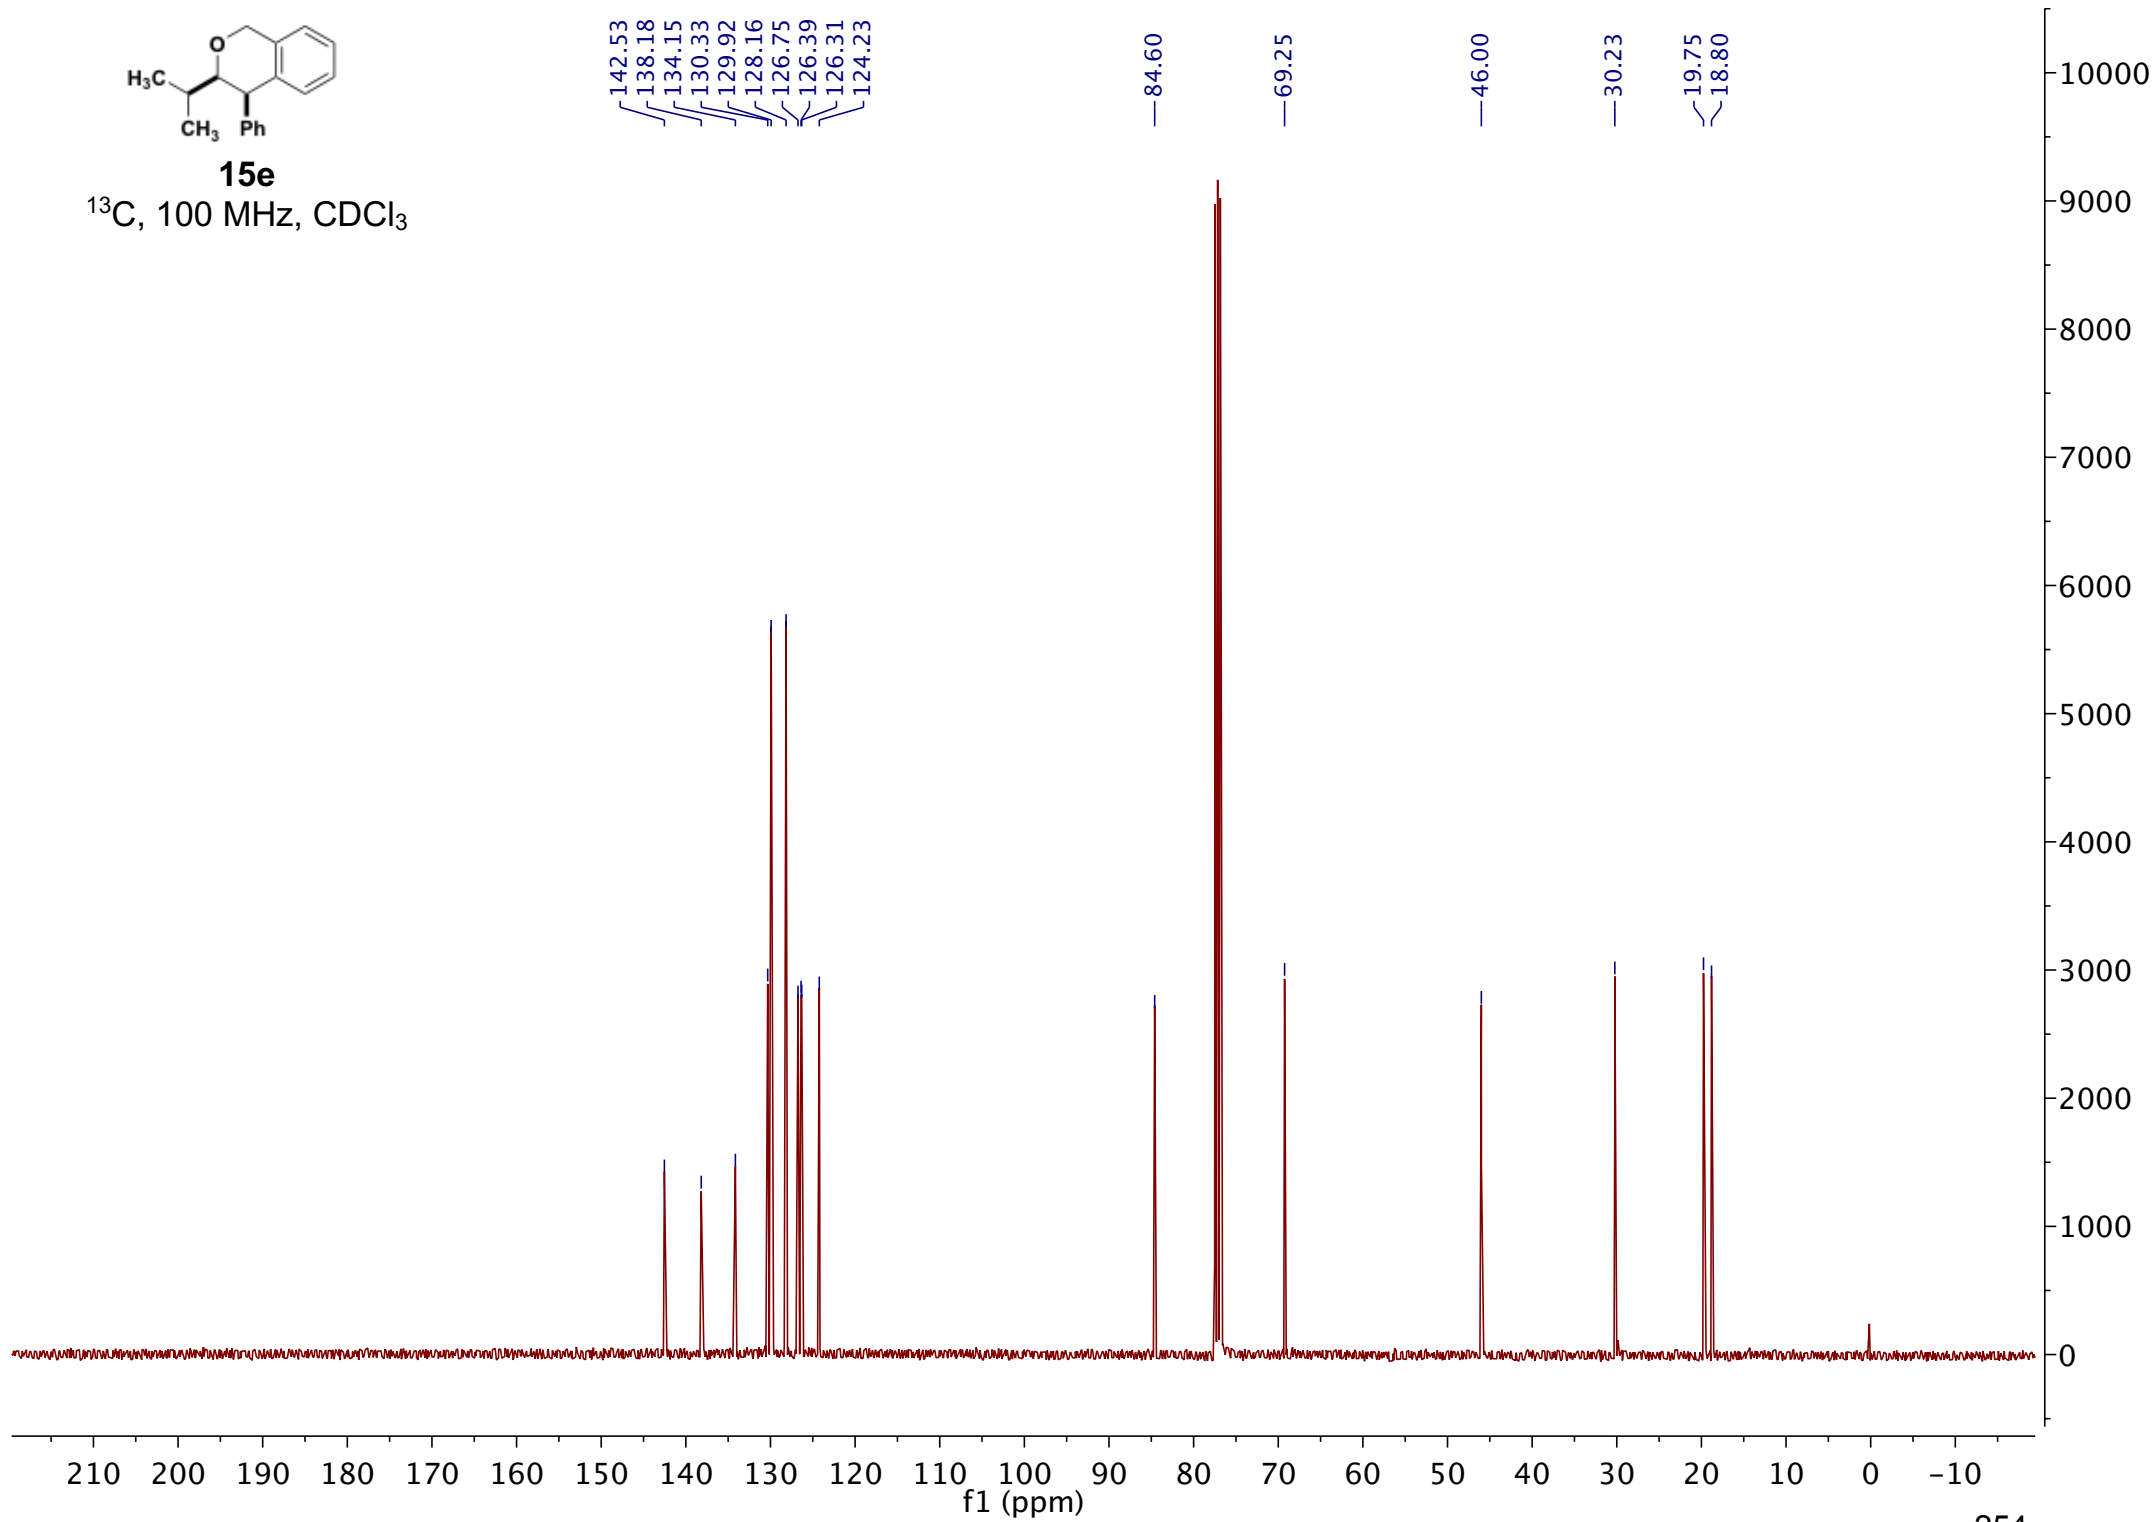

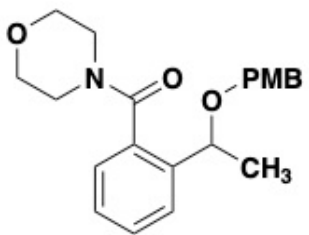

**74**

<sup>1</sup>H, 400 MHz, CDCl<sub>3</sub>

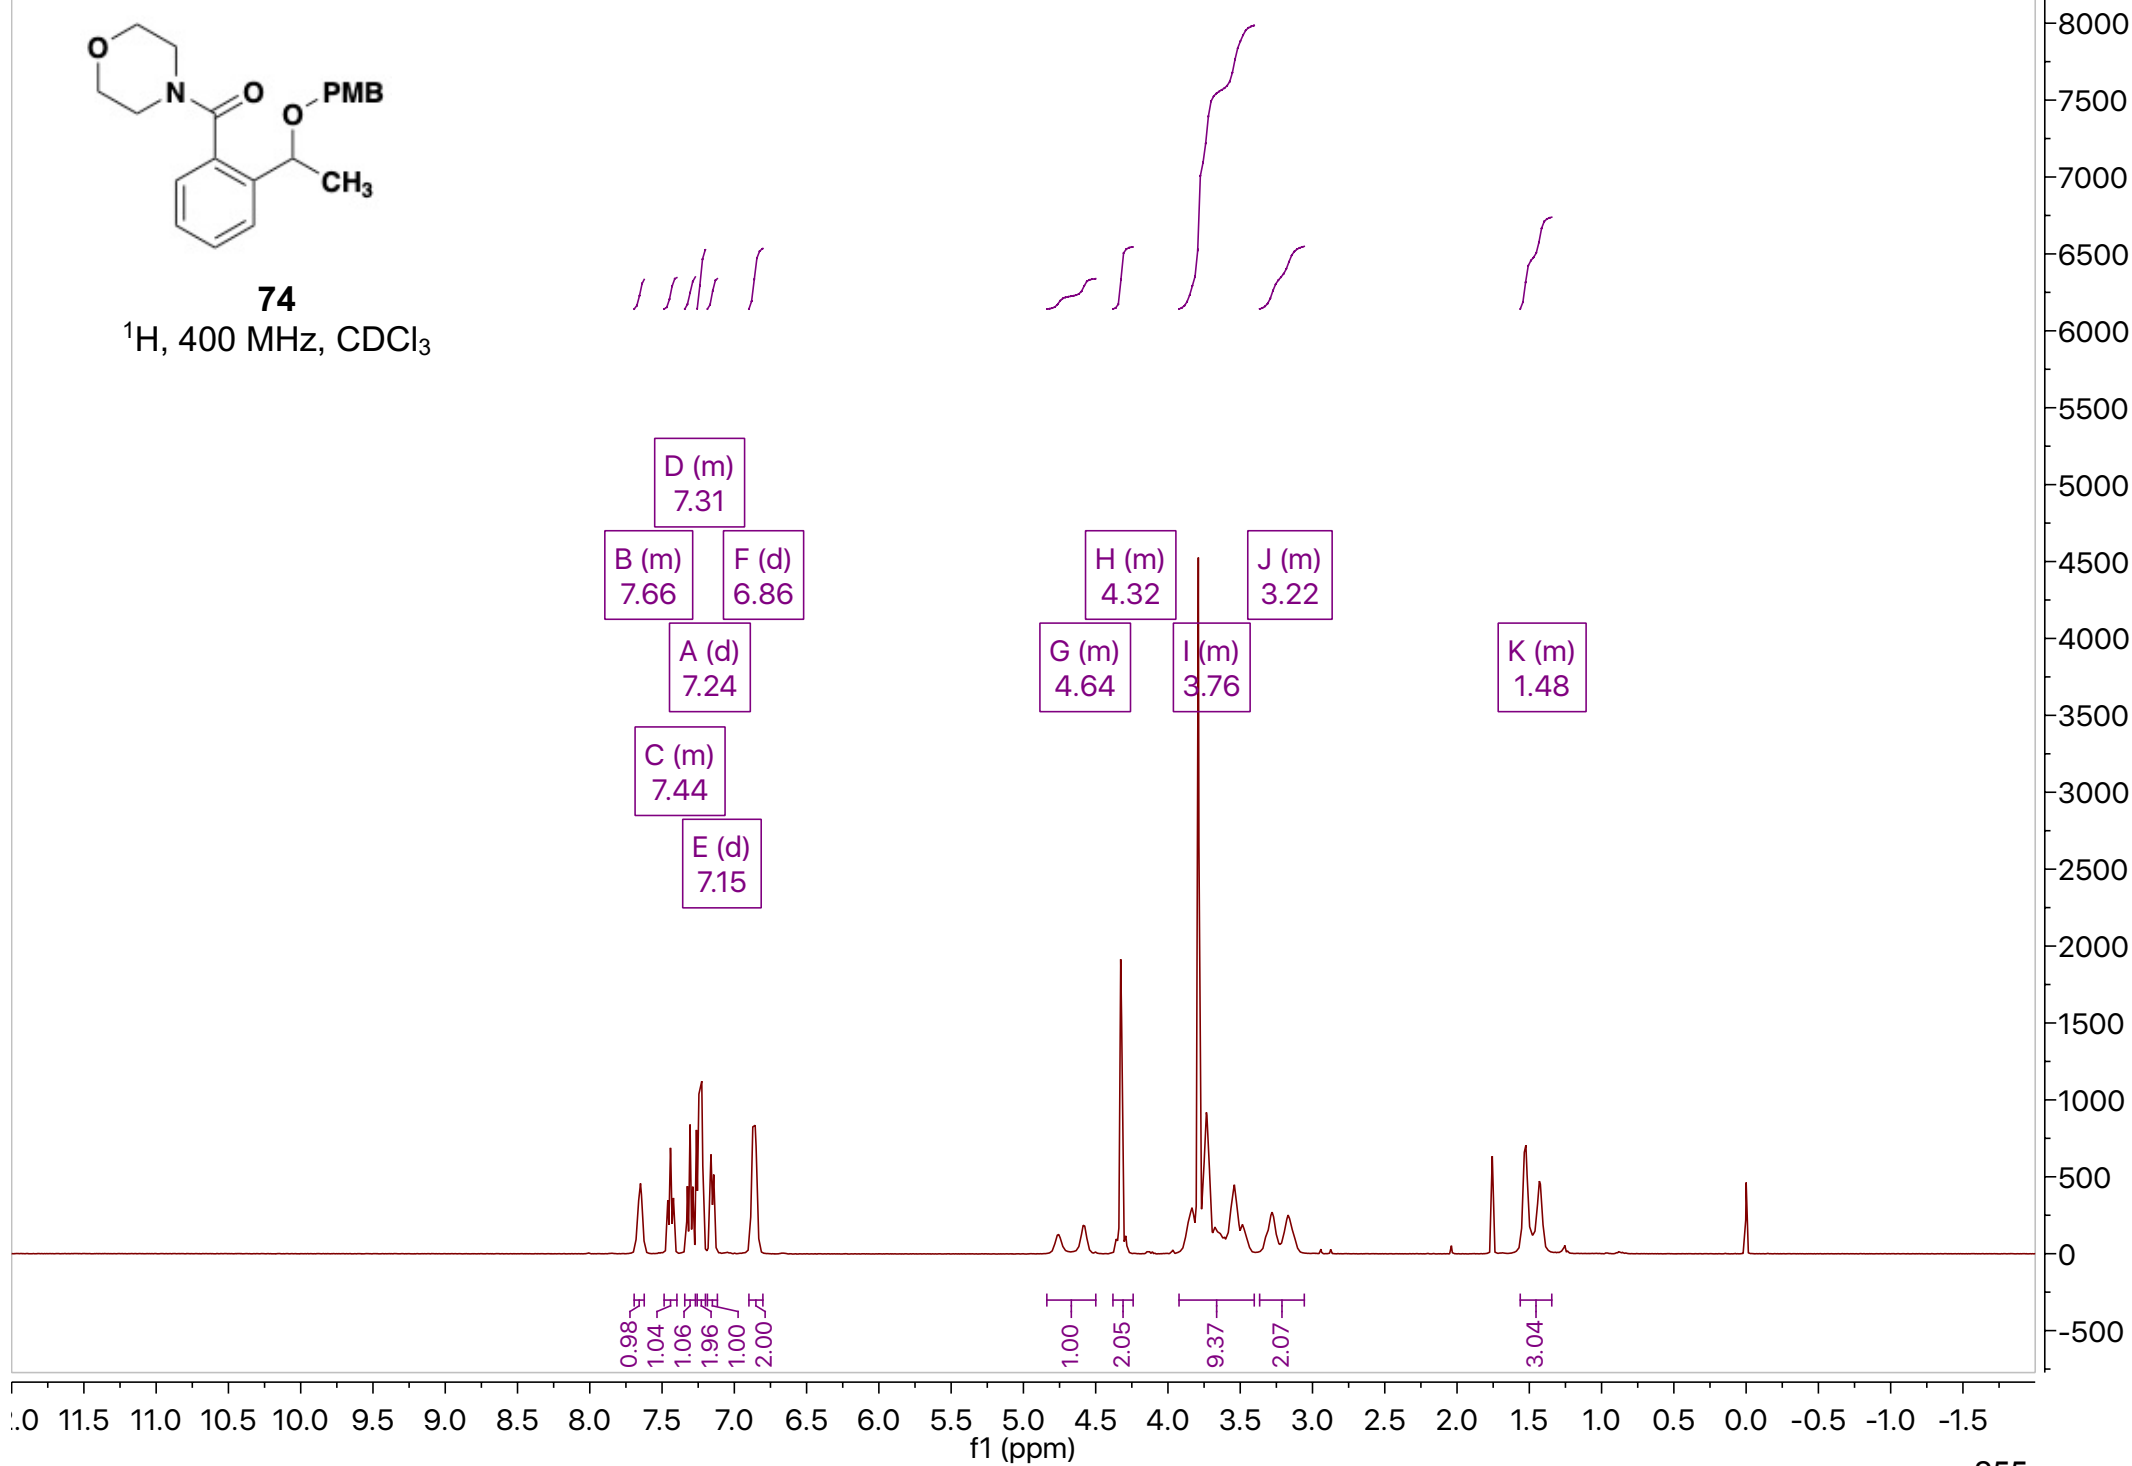

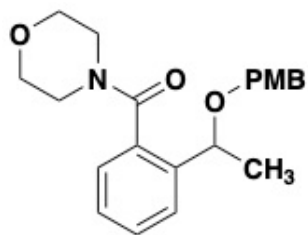

74

$^{13}\text{C}$ , 101 MHz,  $\text{CDCl}_3$

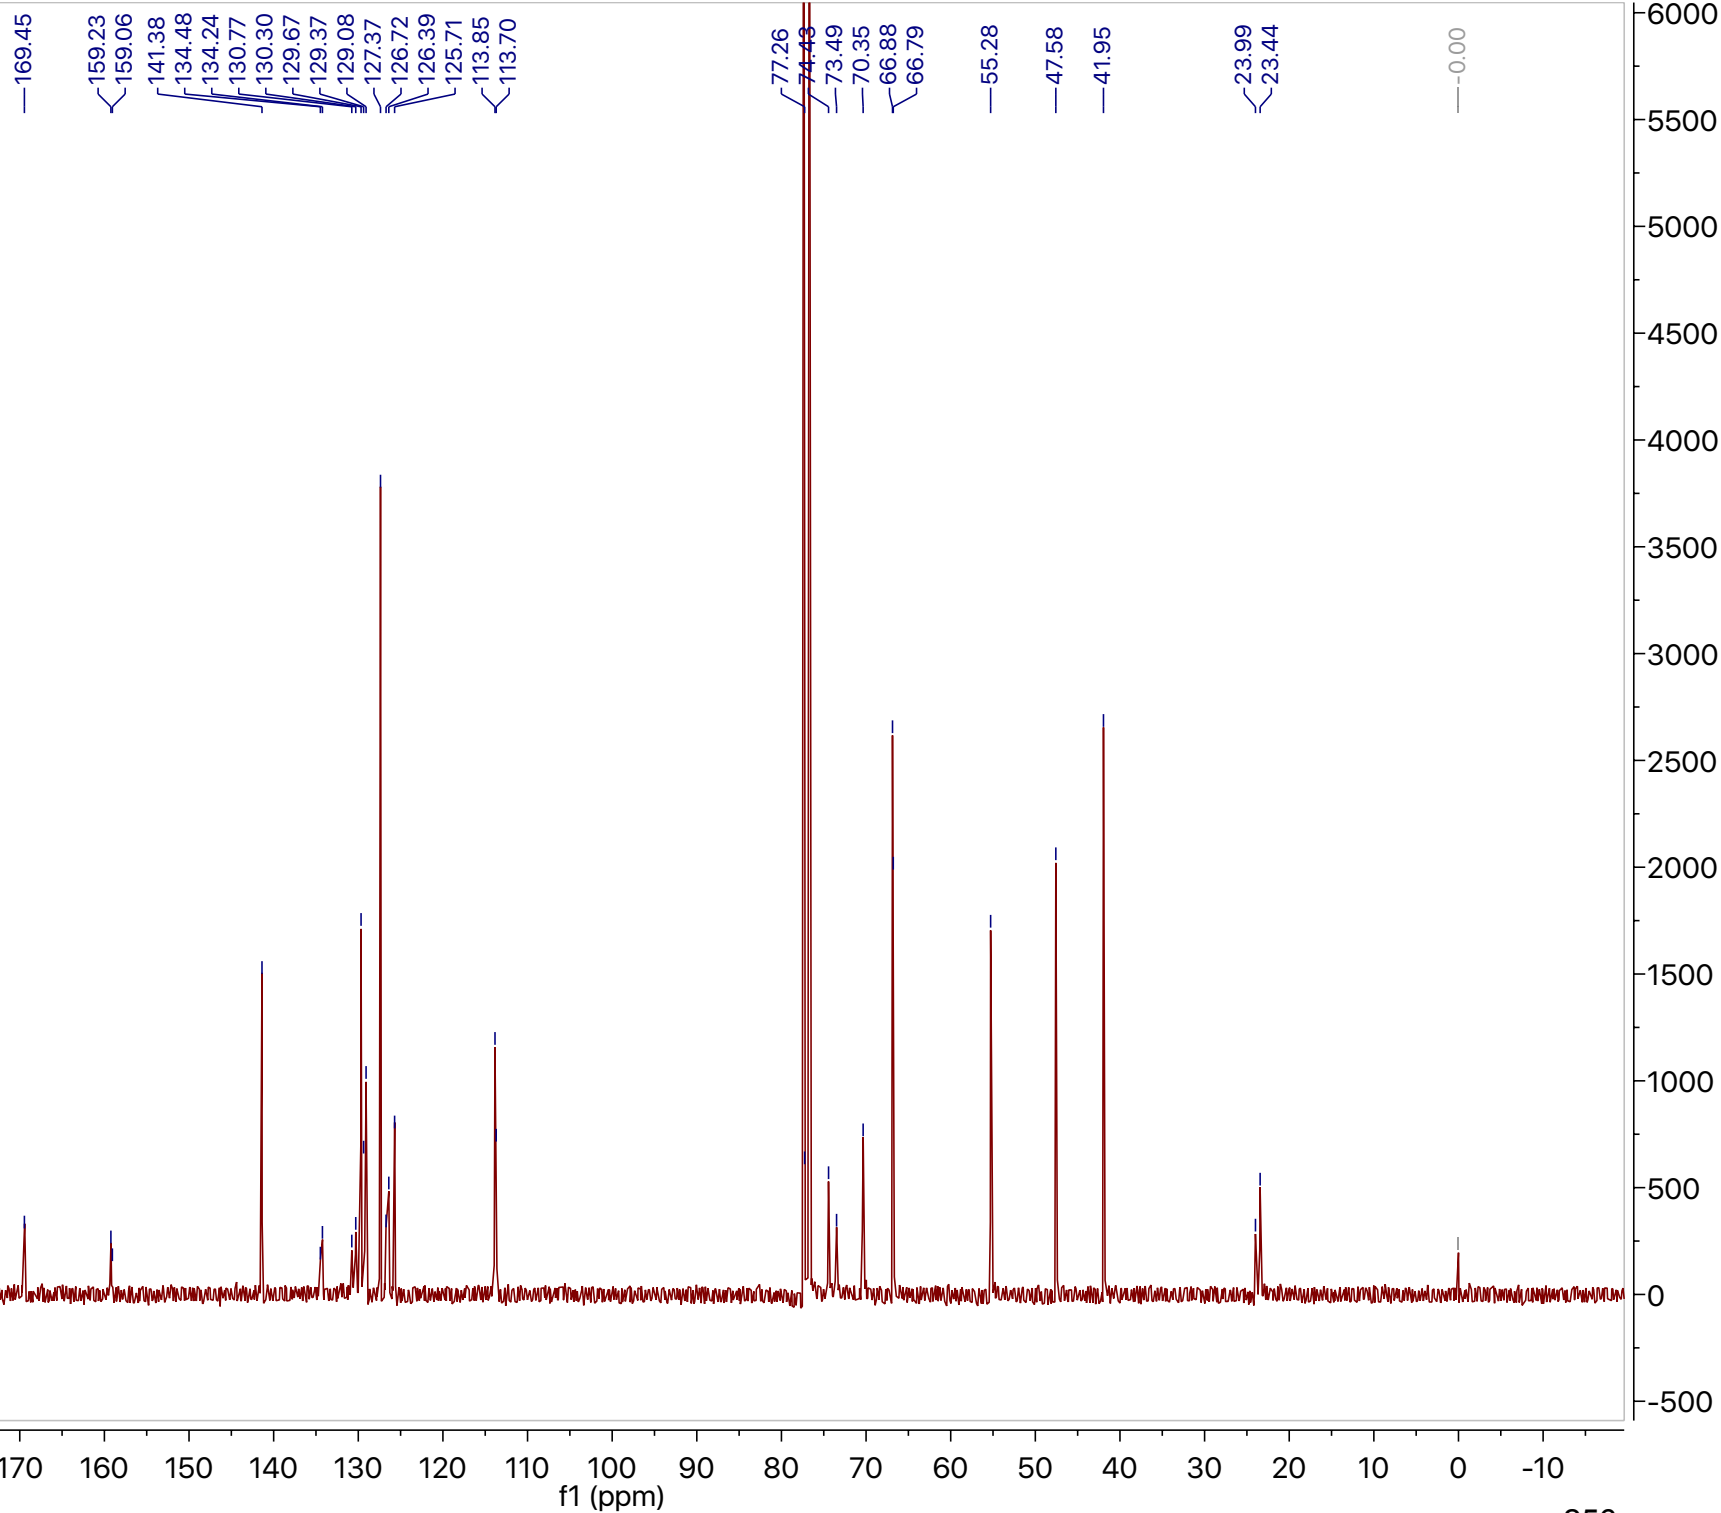

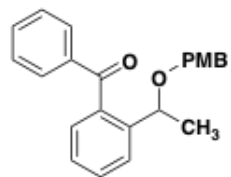

**75**

<sup>1</sup>H, 400 MHz, CDCl<sub>3</sub>

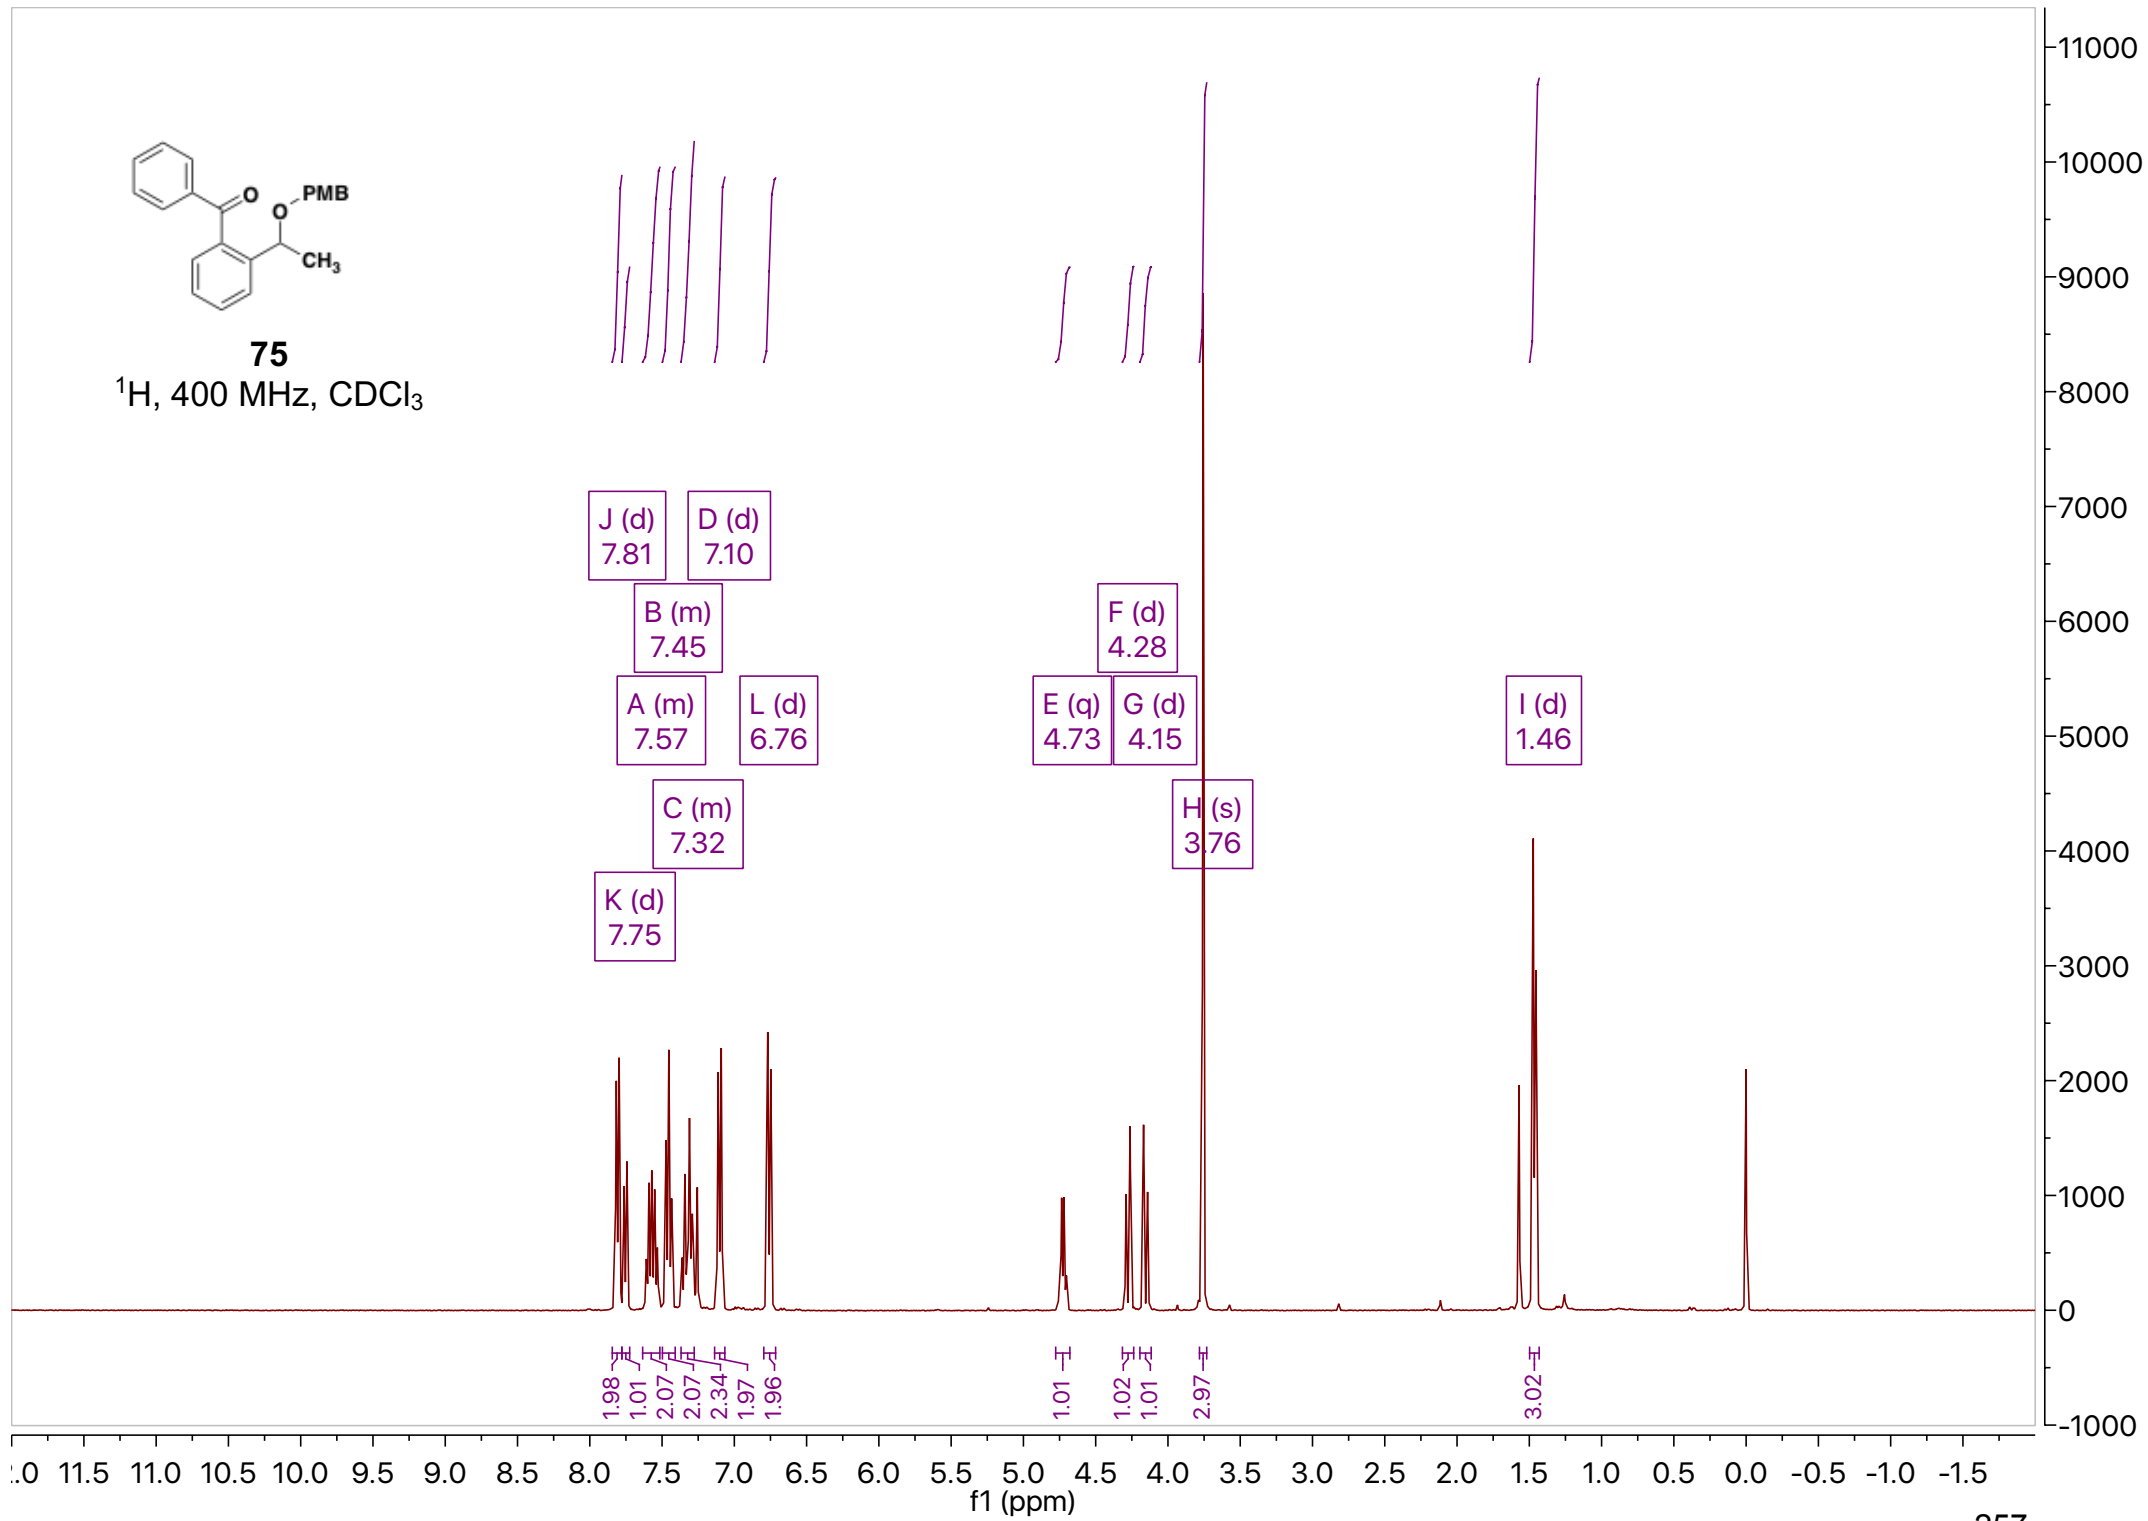

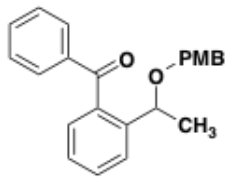

**75**  
 $^{13}\text{C}$ , 101 MHz,  $\text{CDCl}_3$

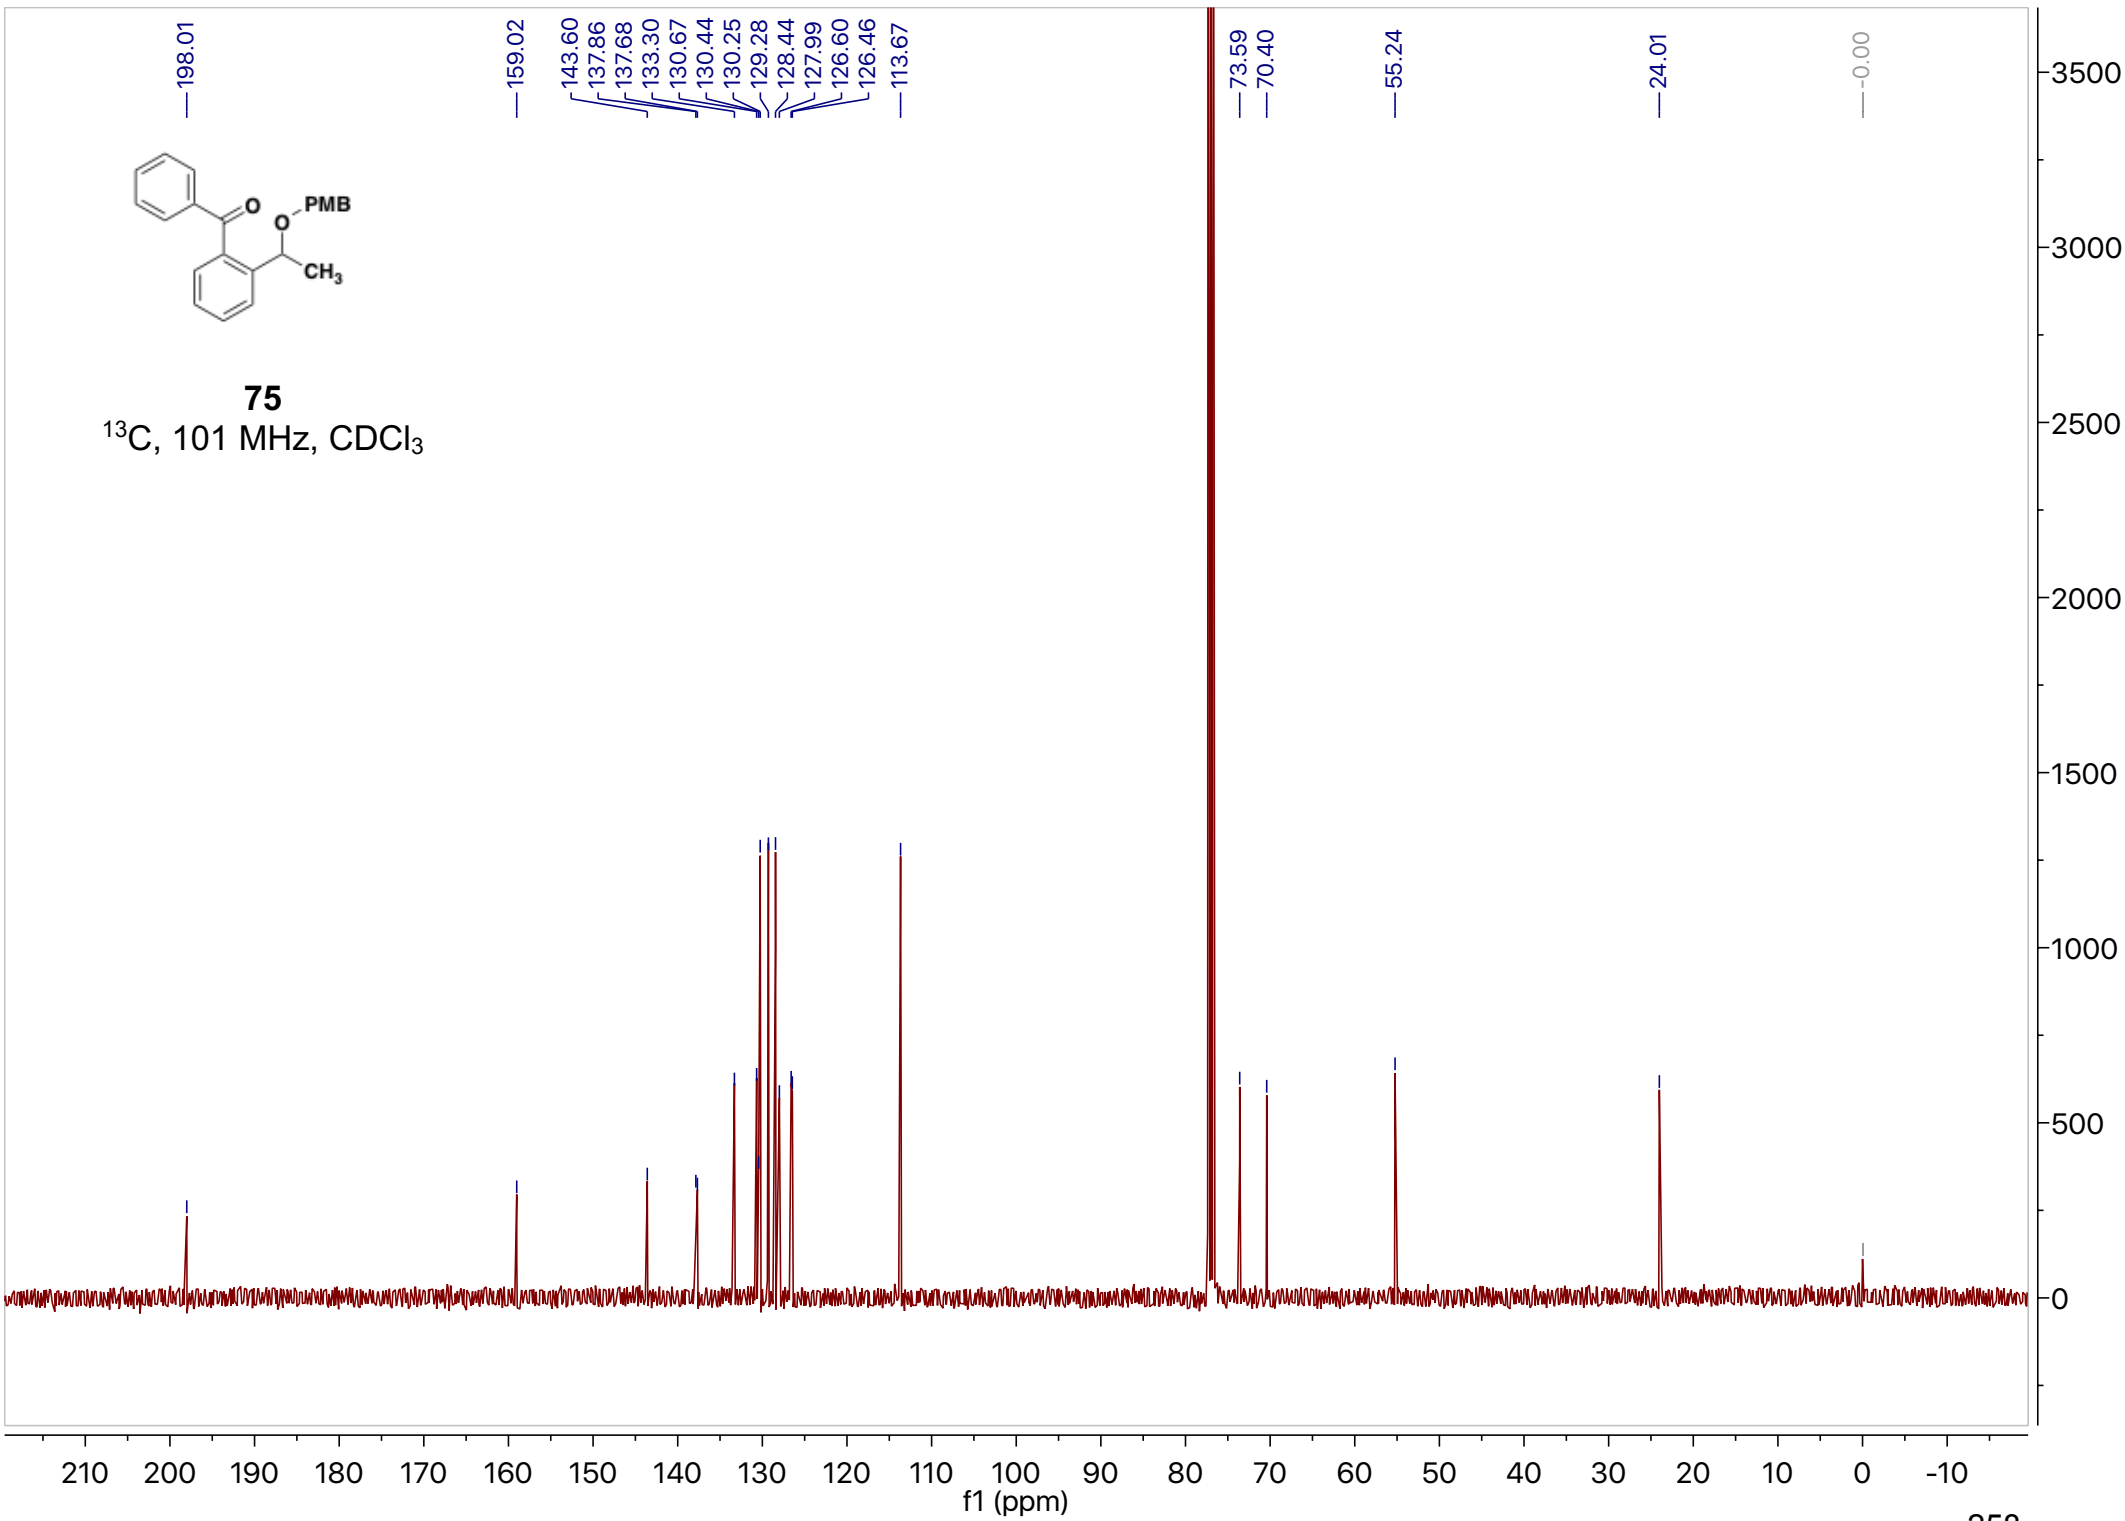



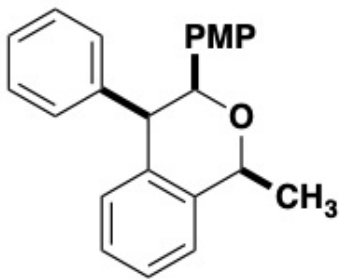

**17a**

$^1\text{H}$ , 600 MHz,  $\text{CDCl}_3$

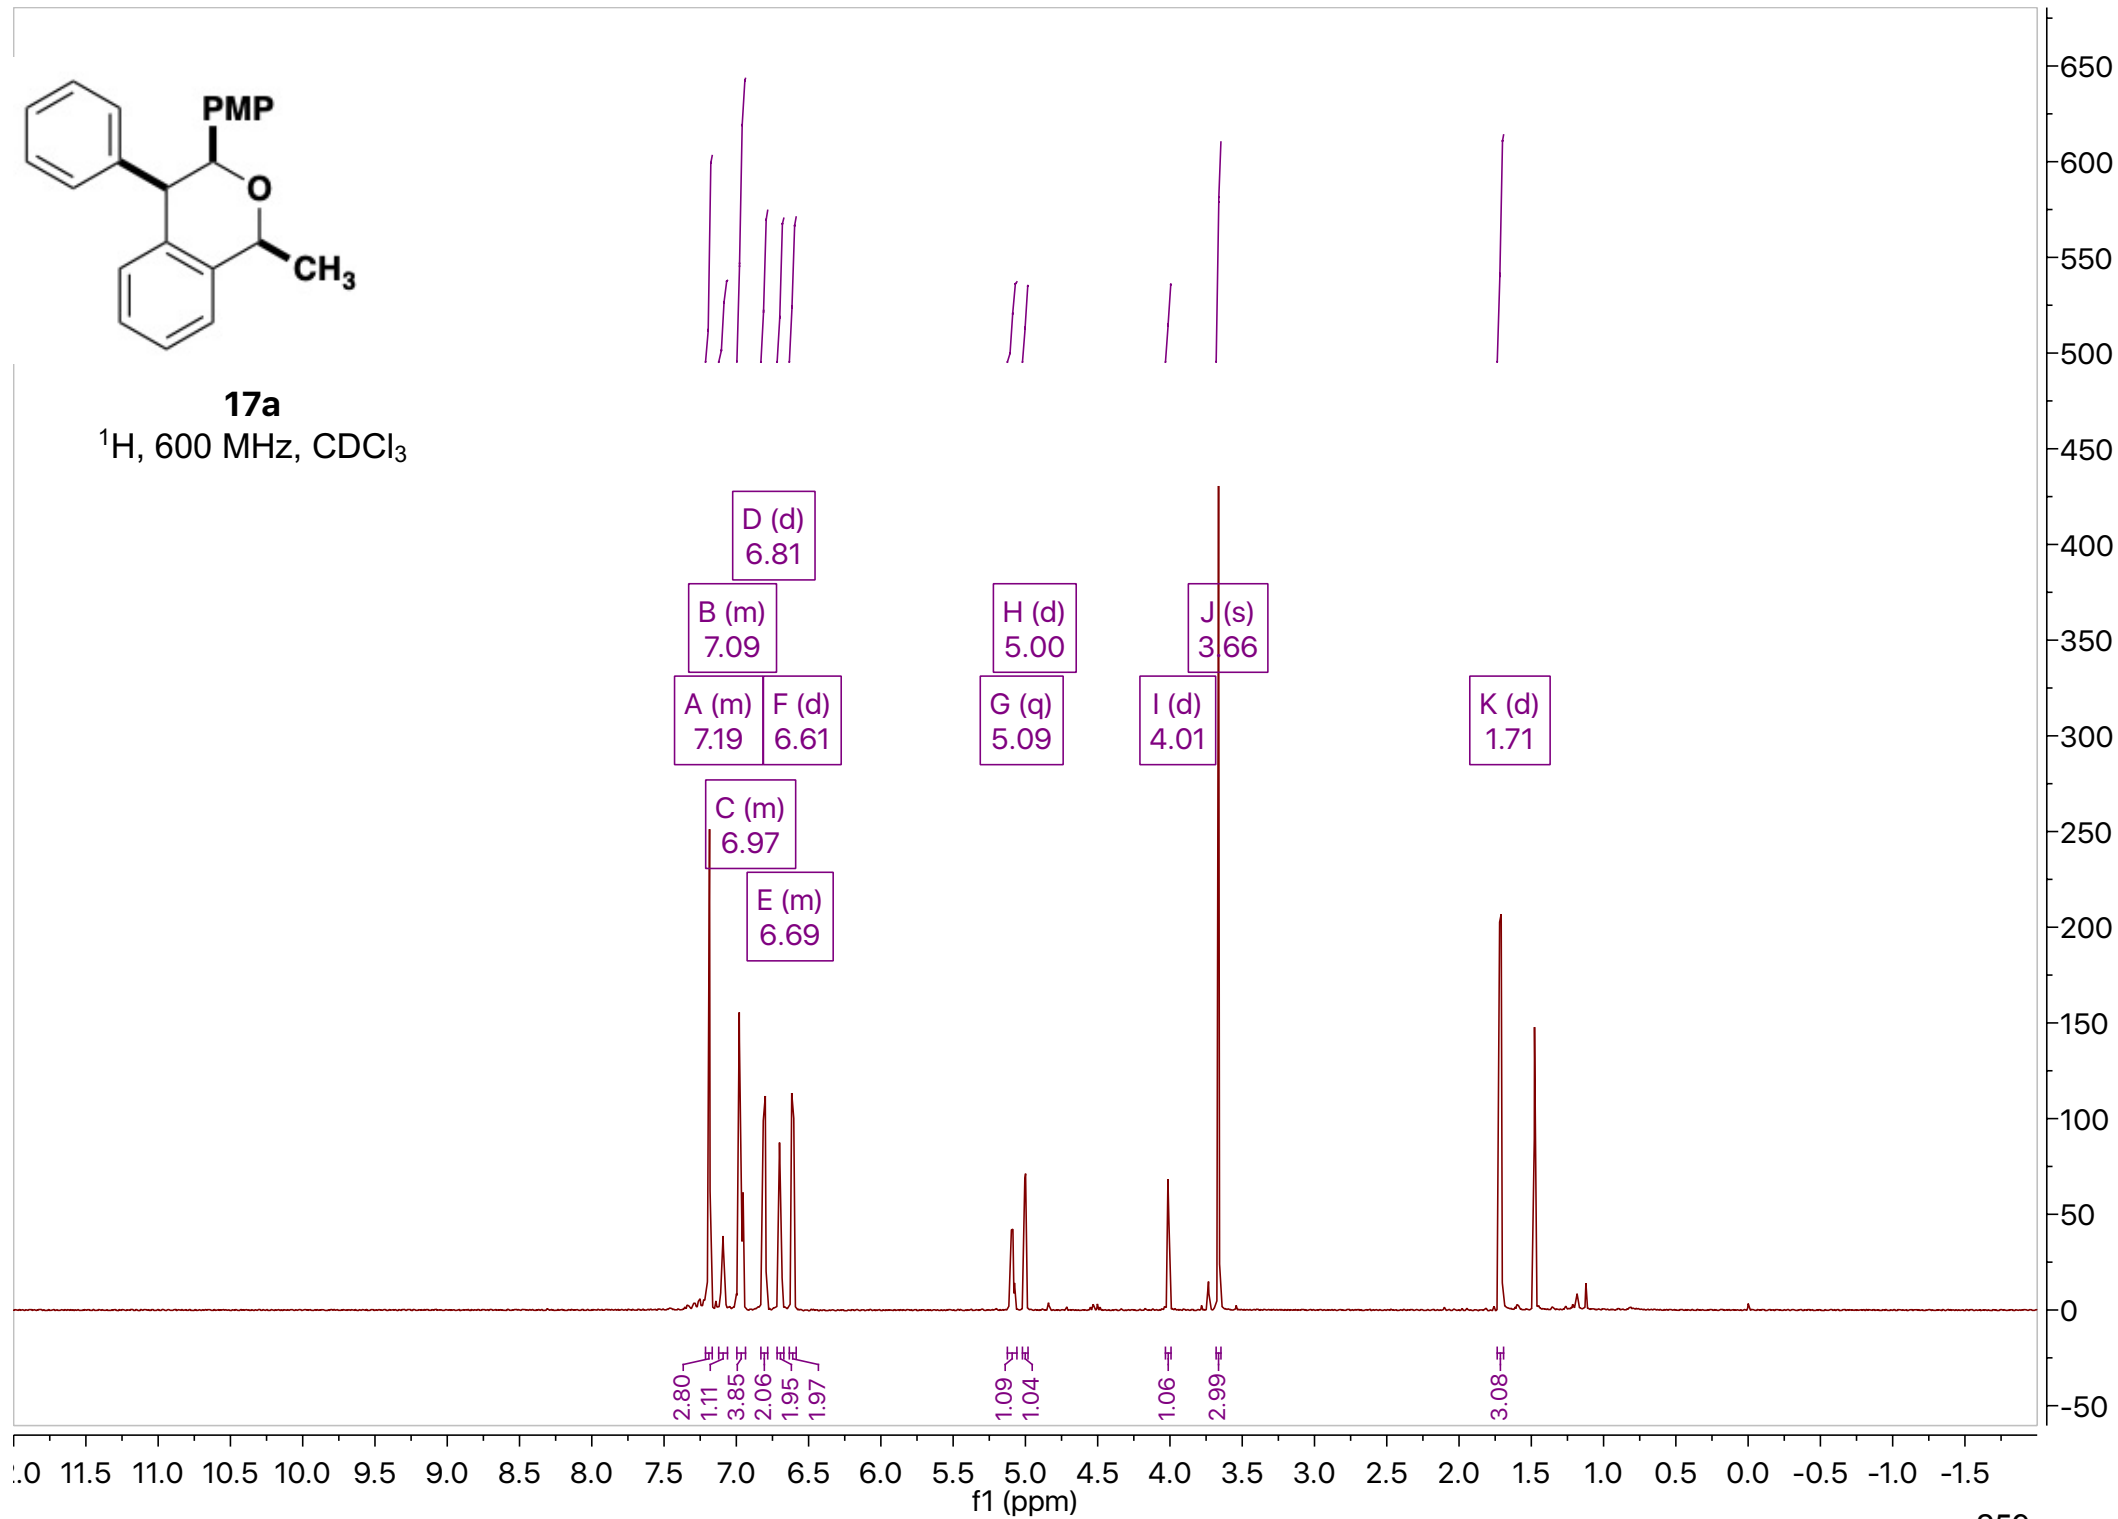

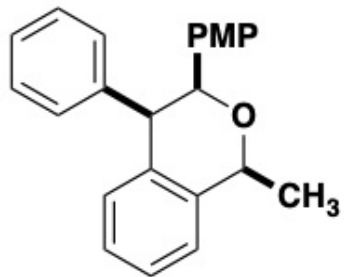

<sup>13</sup>C, 151 MHz, CDCl<sub>3</sub>

158.55  
140.88  
139.35  
137.39  
132.85  
130.52  
130.31  
127.37  
127.36  
126.90  
126.87  
126.11  
124.55  
113.13

79.17  
74.41

55.31  
51.23

22.38

130  
120  
110  
100  
90  
80  
70  
60  
50  
40  
30  
20  
10  
0  
-10

230 220 210 200 190 180 170 160 150 140 130 120 110 100 90 80 70 60 50 40 30 20 10 0 -10

f1 (ppm)

260

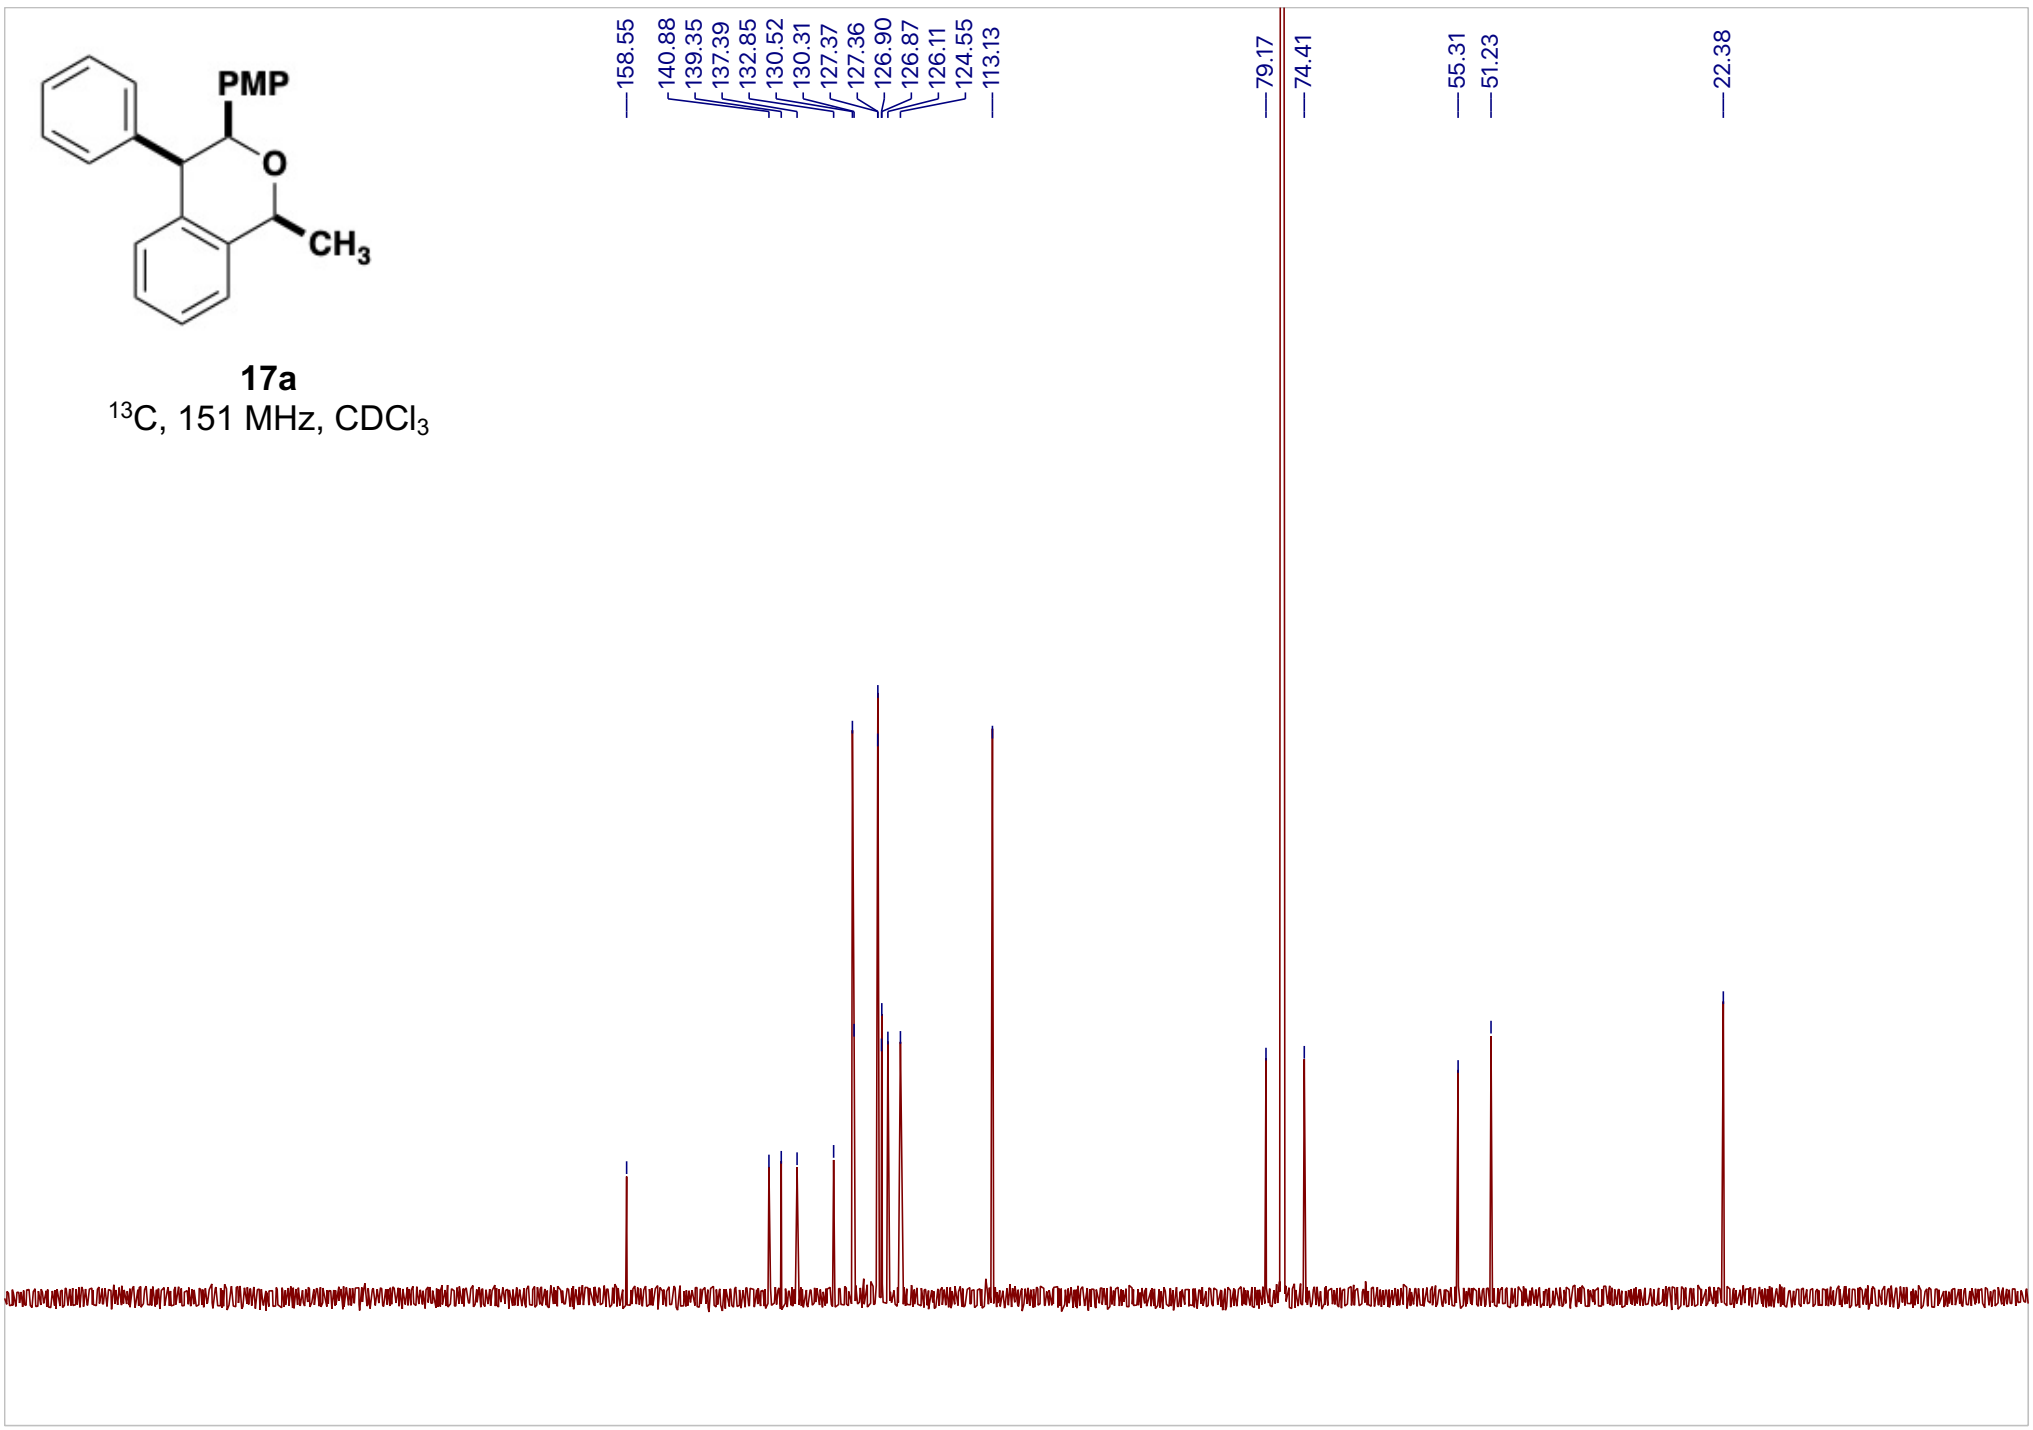

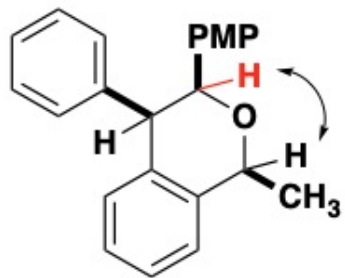

**17a**

NOE, 600 MHz, CDCl<sub>3</sub>

5.07  
5.07

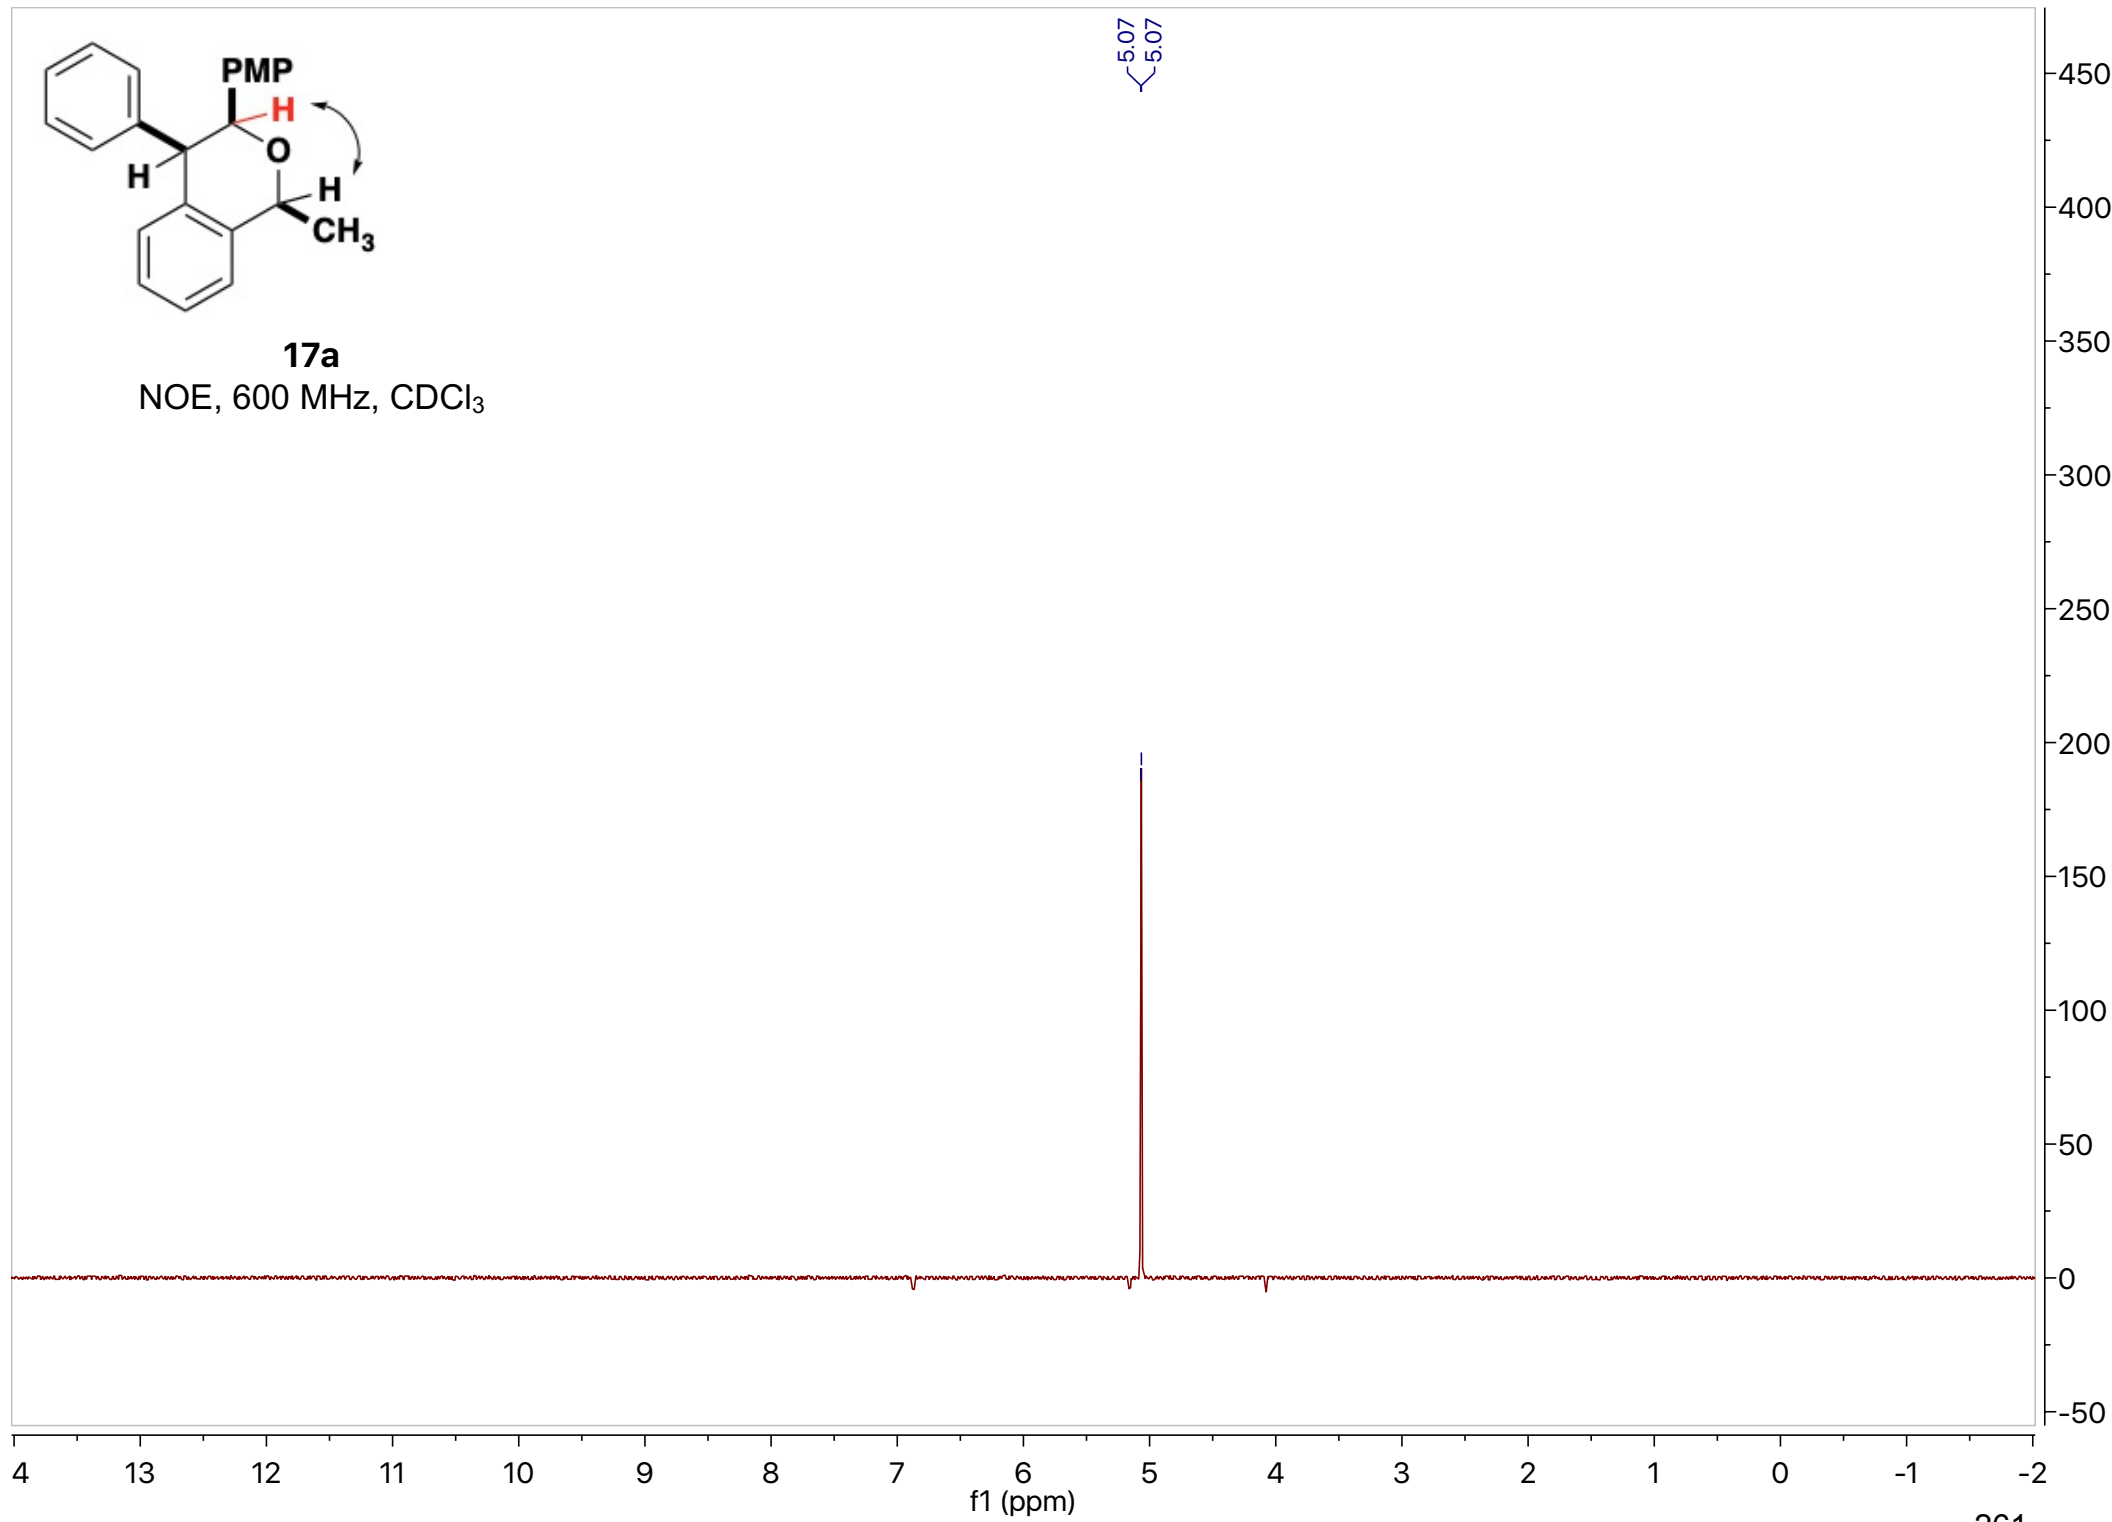

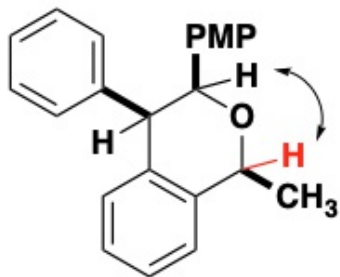

**17a**

NOE, 600 MHz, CDCl<sub>3</sub>

5.17  
5.16  
5.15  
5.14

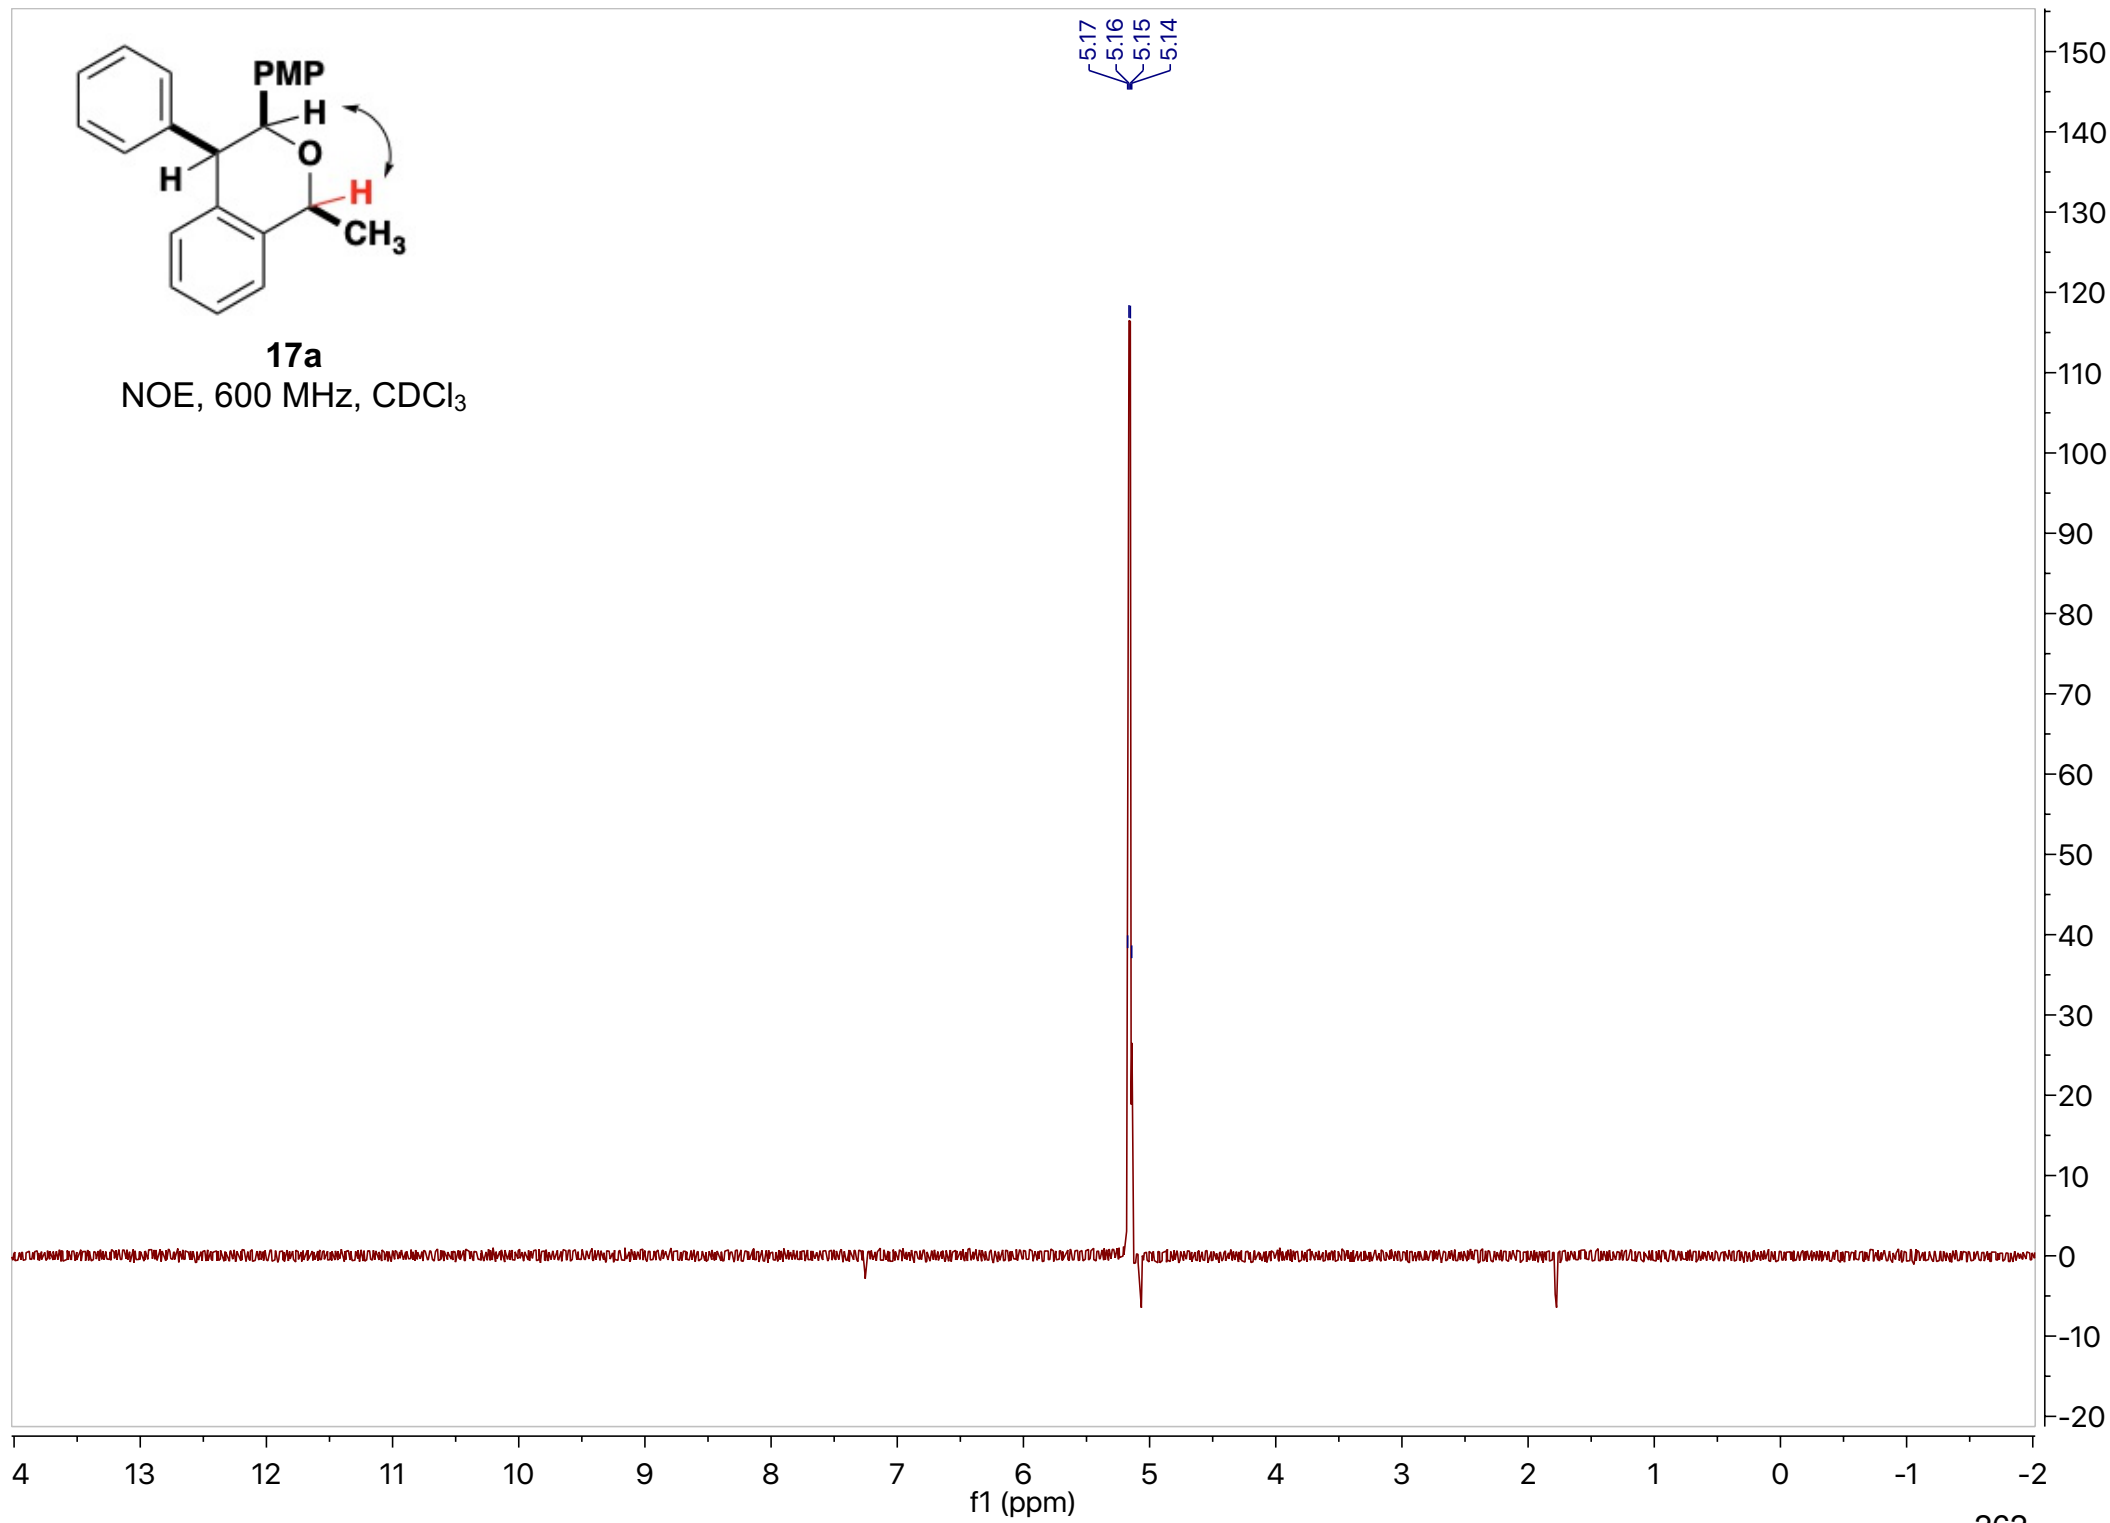

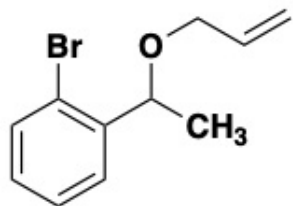

76

<sup>1</sup>H, 600 MHz, CDCl<sub>3</sub>

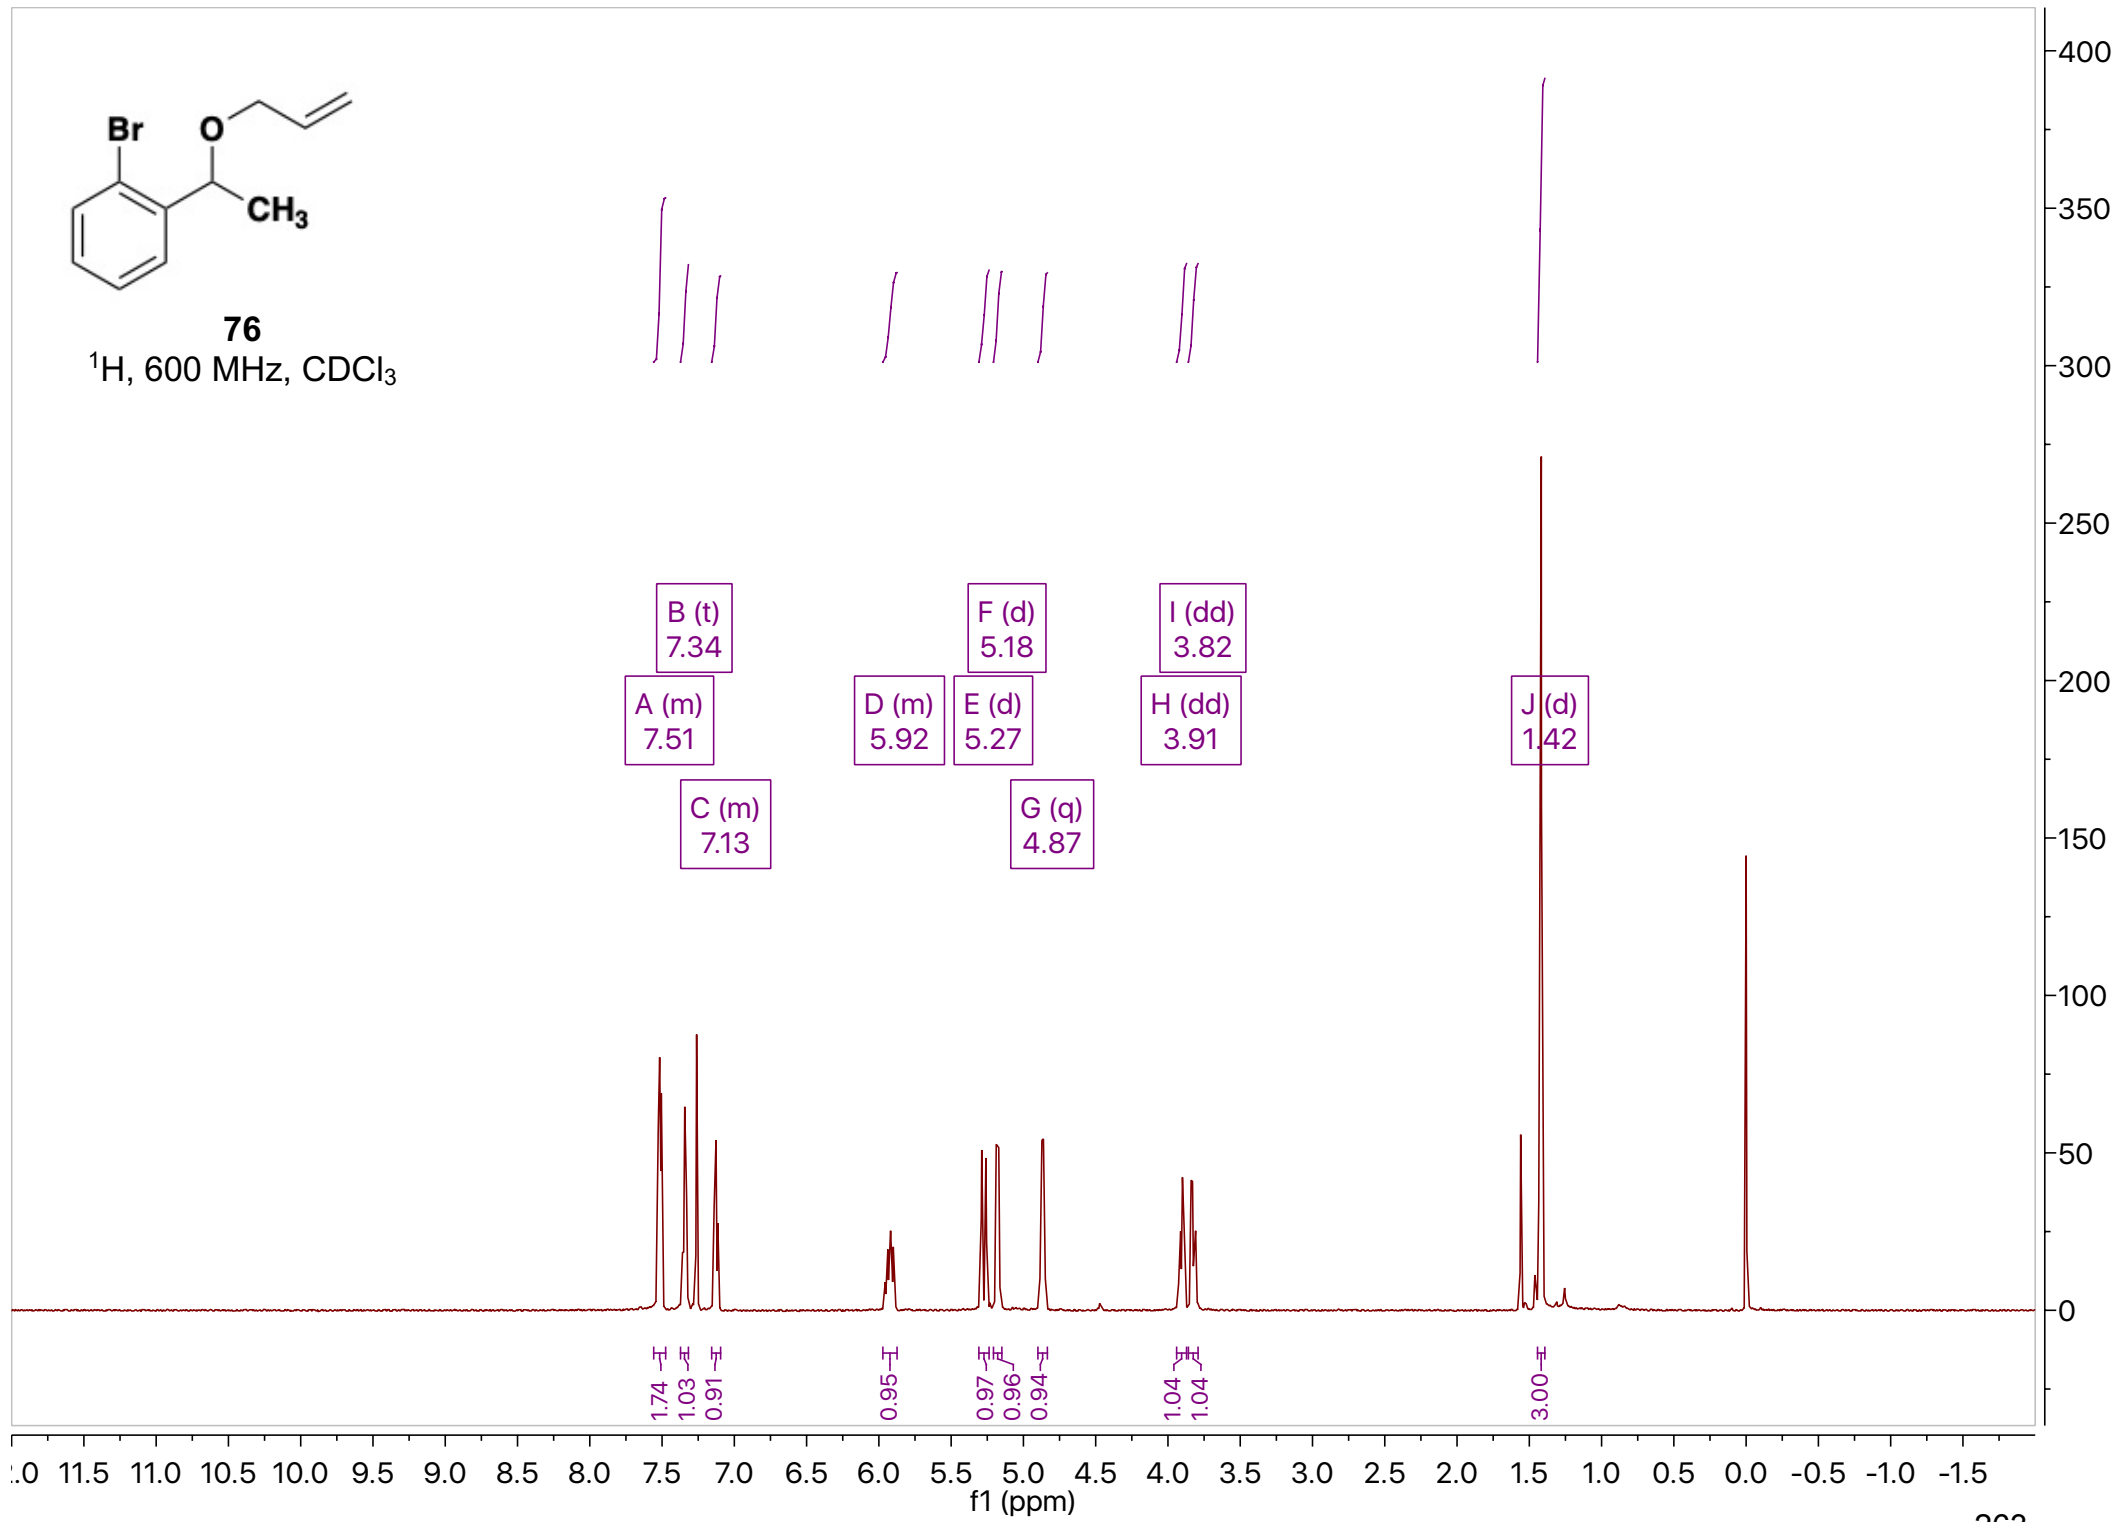

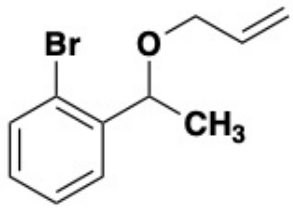

**76**

$^{13}\text{C}$ , 151 MHz,  $\text{CDCl}_3$

143.03  
134.79  
132.74  
128.80  
128.00  
127.25  
122.63  
117.10

77.16  $\text{CDCl}_3$   
76.04  
69.87

22.86

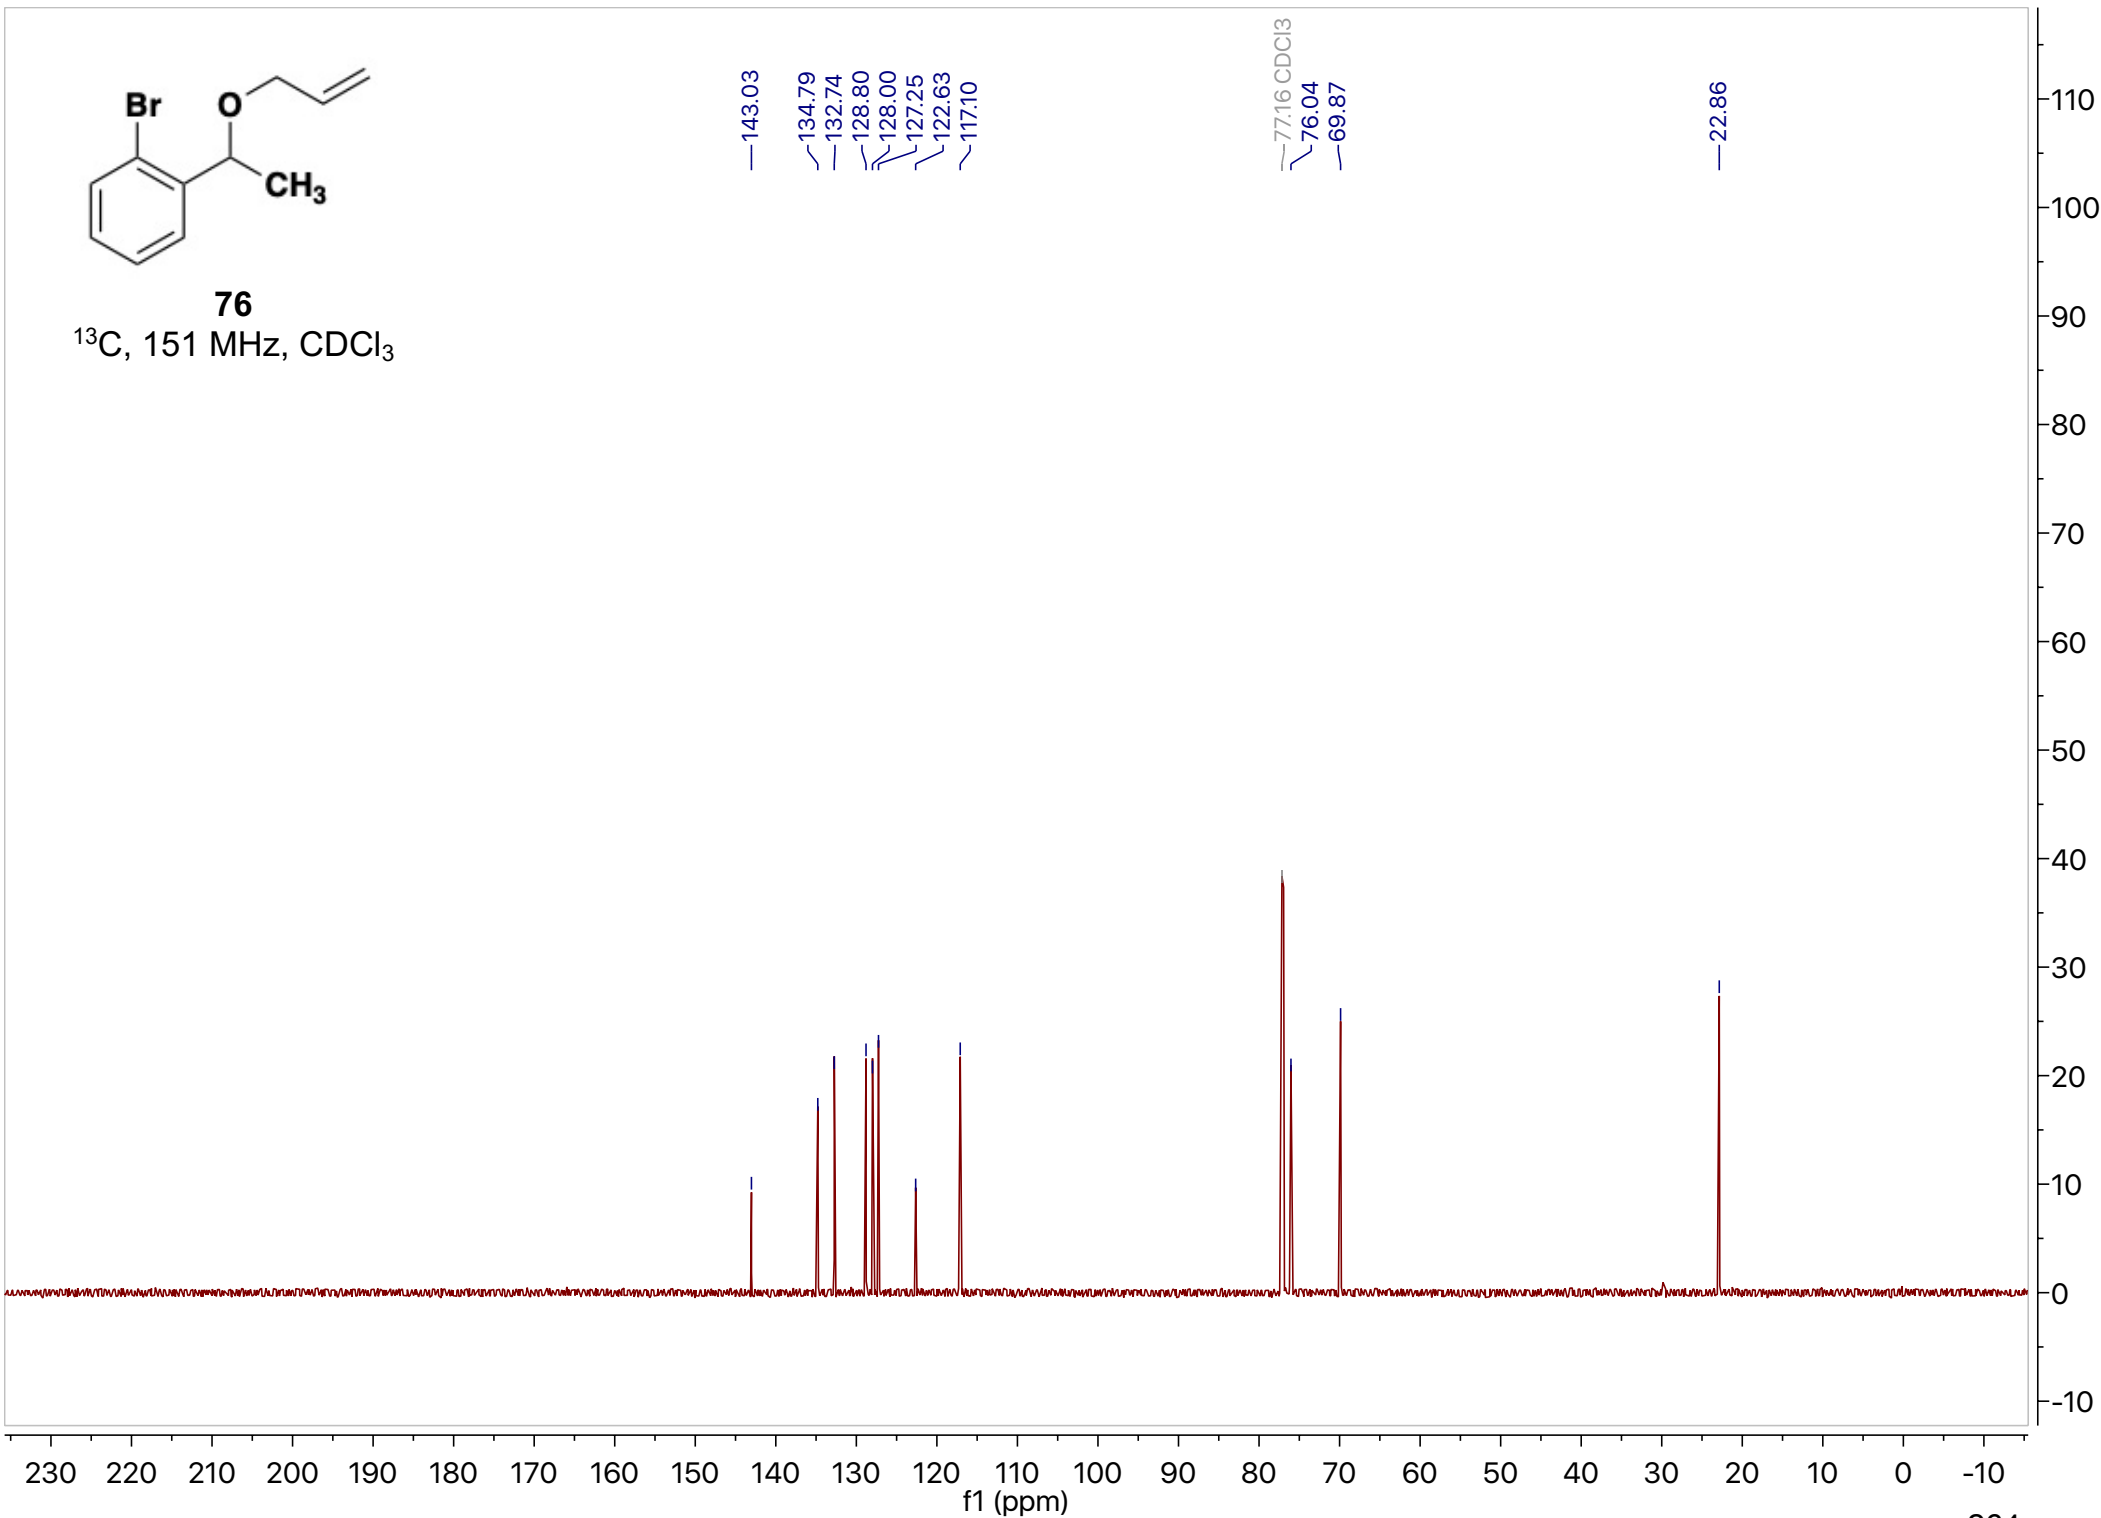

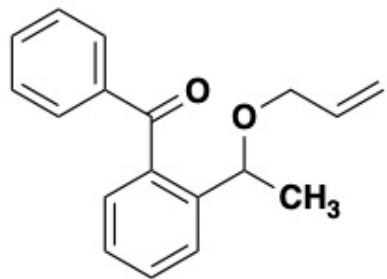

77

$^1\text{H}$ , 600 MHz,  $\text{CDCl}_3$

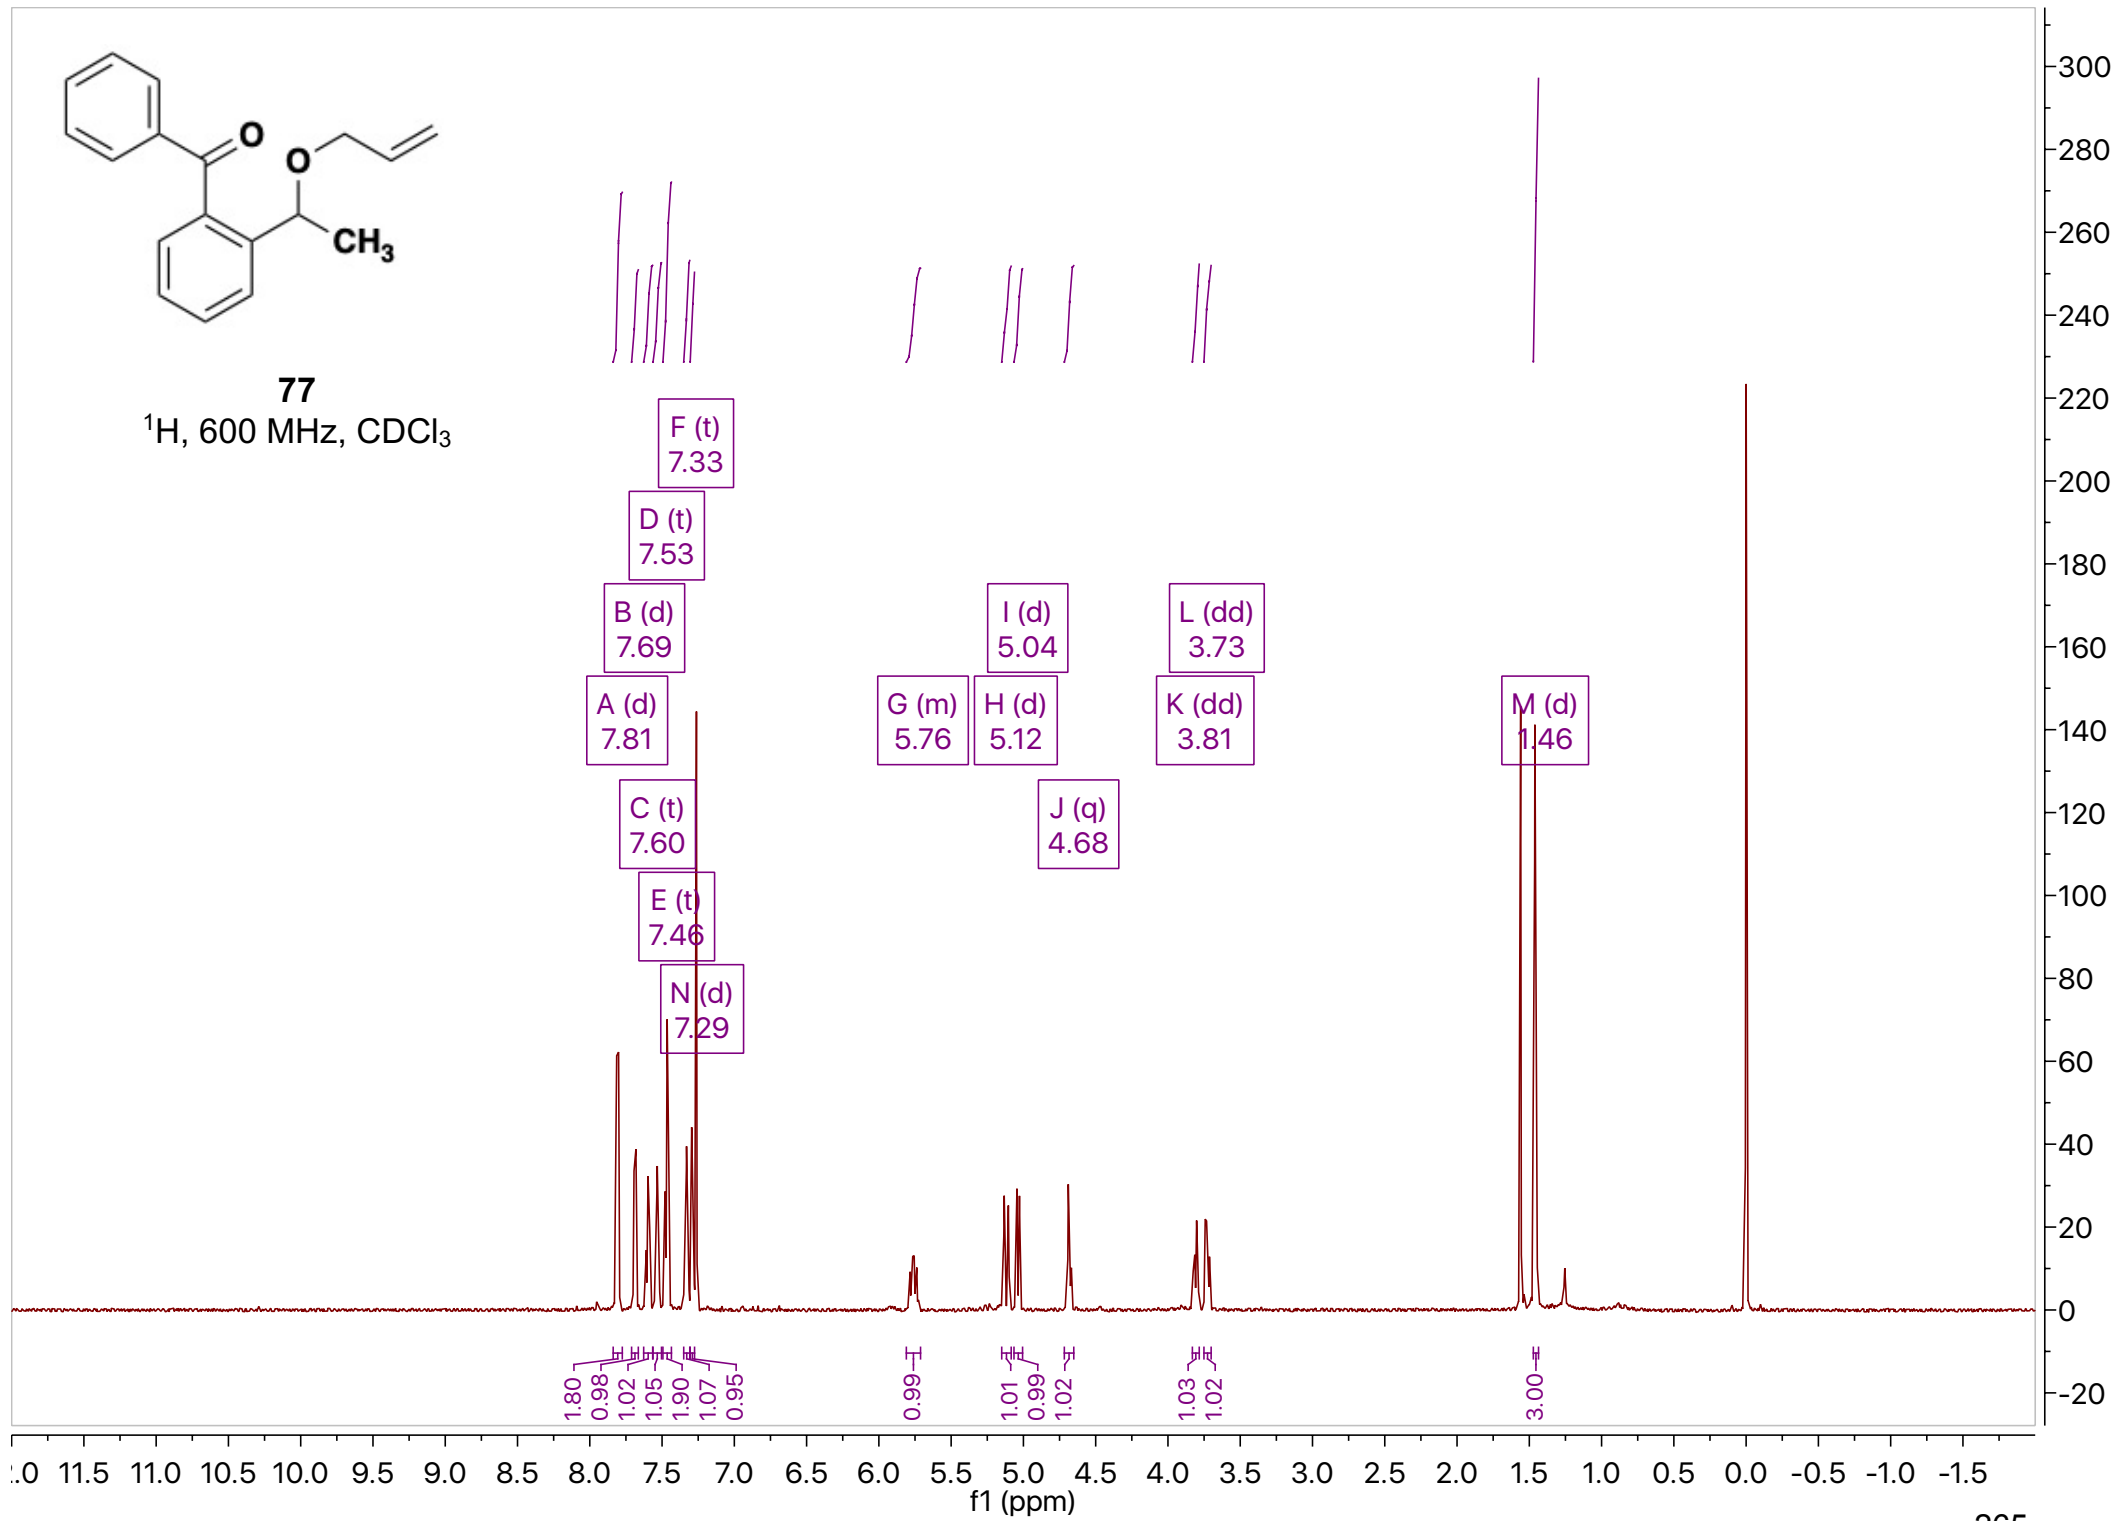

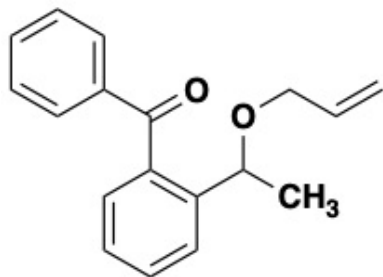

77

$^{13}\text{C}$ , 101 MHz,  $\text{CDCl}_3$

198.17  
143.66  
137.89  
137.85  
134.84  
133.44  
130.77  
130.36  
128.58  
128.14  
126.64  
126.59  
116.88

77.00  
73.83  
69.86

24.02

-0.15

210 200 190 180 170 160 150 140 130 120 110 100 90 80 70 60 50 40 30 20 10 0 -10

f1 (ppm)

266

10000  
9000  
8000  
7000  
6000  
5000  
4000  
3000  
2000  
1000  
0  
-1000



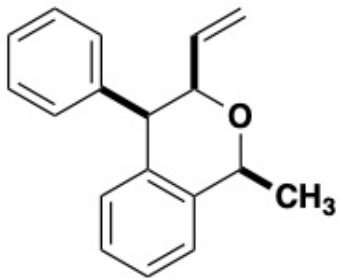

**17b**

<sup>1</sup>H, 400 MHz, CDCl<sub>3</sub>

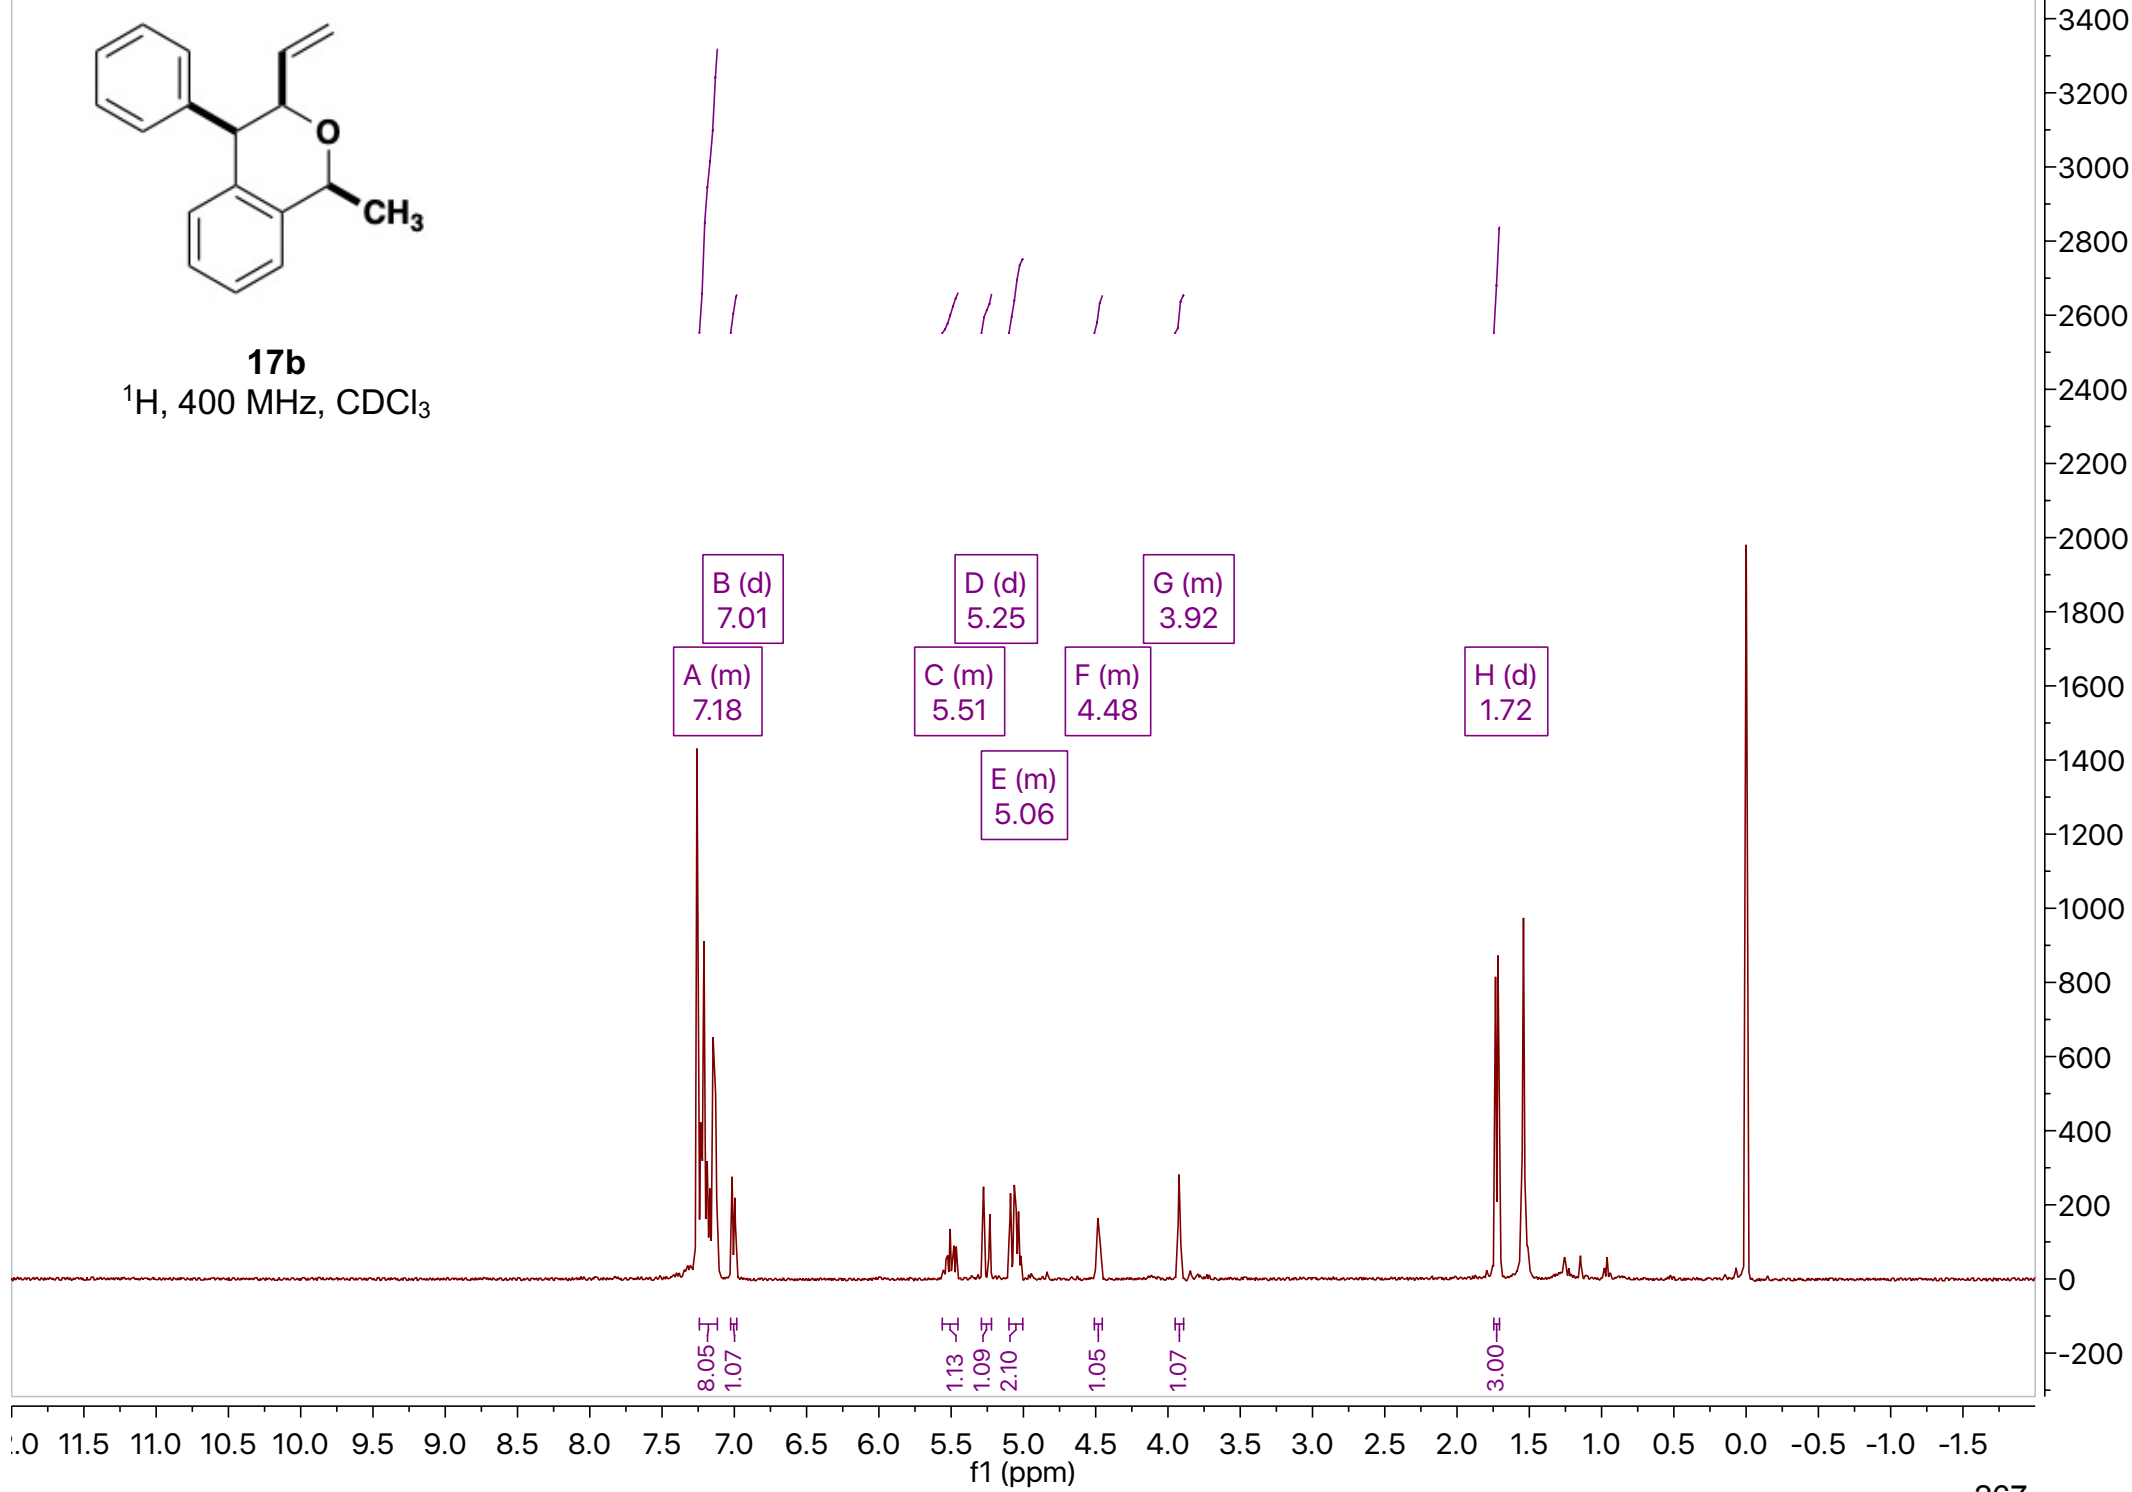

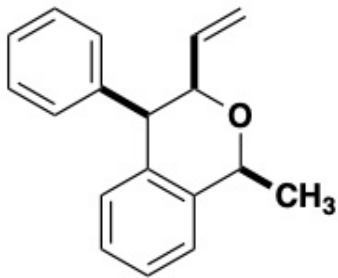

**17b**

$^{13}\text{C}$ , 151 MHz,  $\text{CDCl}_3$

141.56  
139.00  
137.32  
137.07  
130.27  
130.21  
127.94  
126.88  
126.81  
126.48  
124.46  
— 116.45

~ 78.83

~ 77.16  $\text{CDCl}_3$

~ 73.56

— 49.48

— 22.20

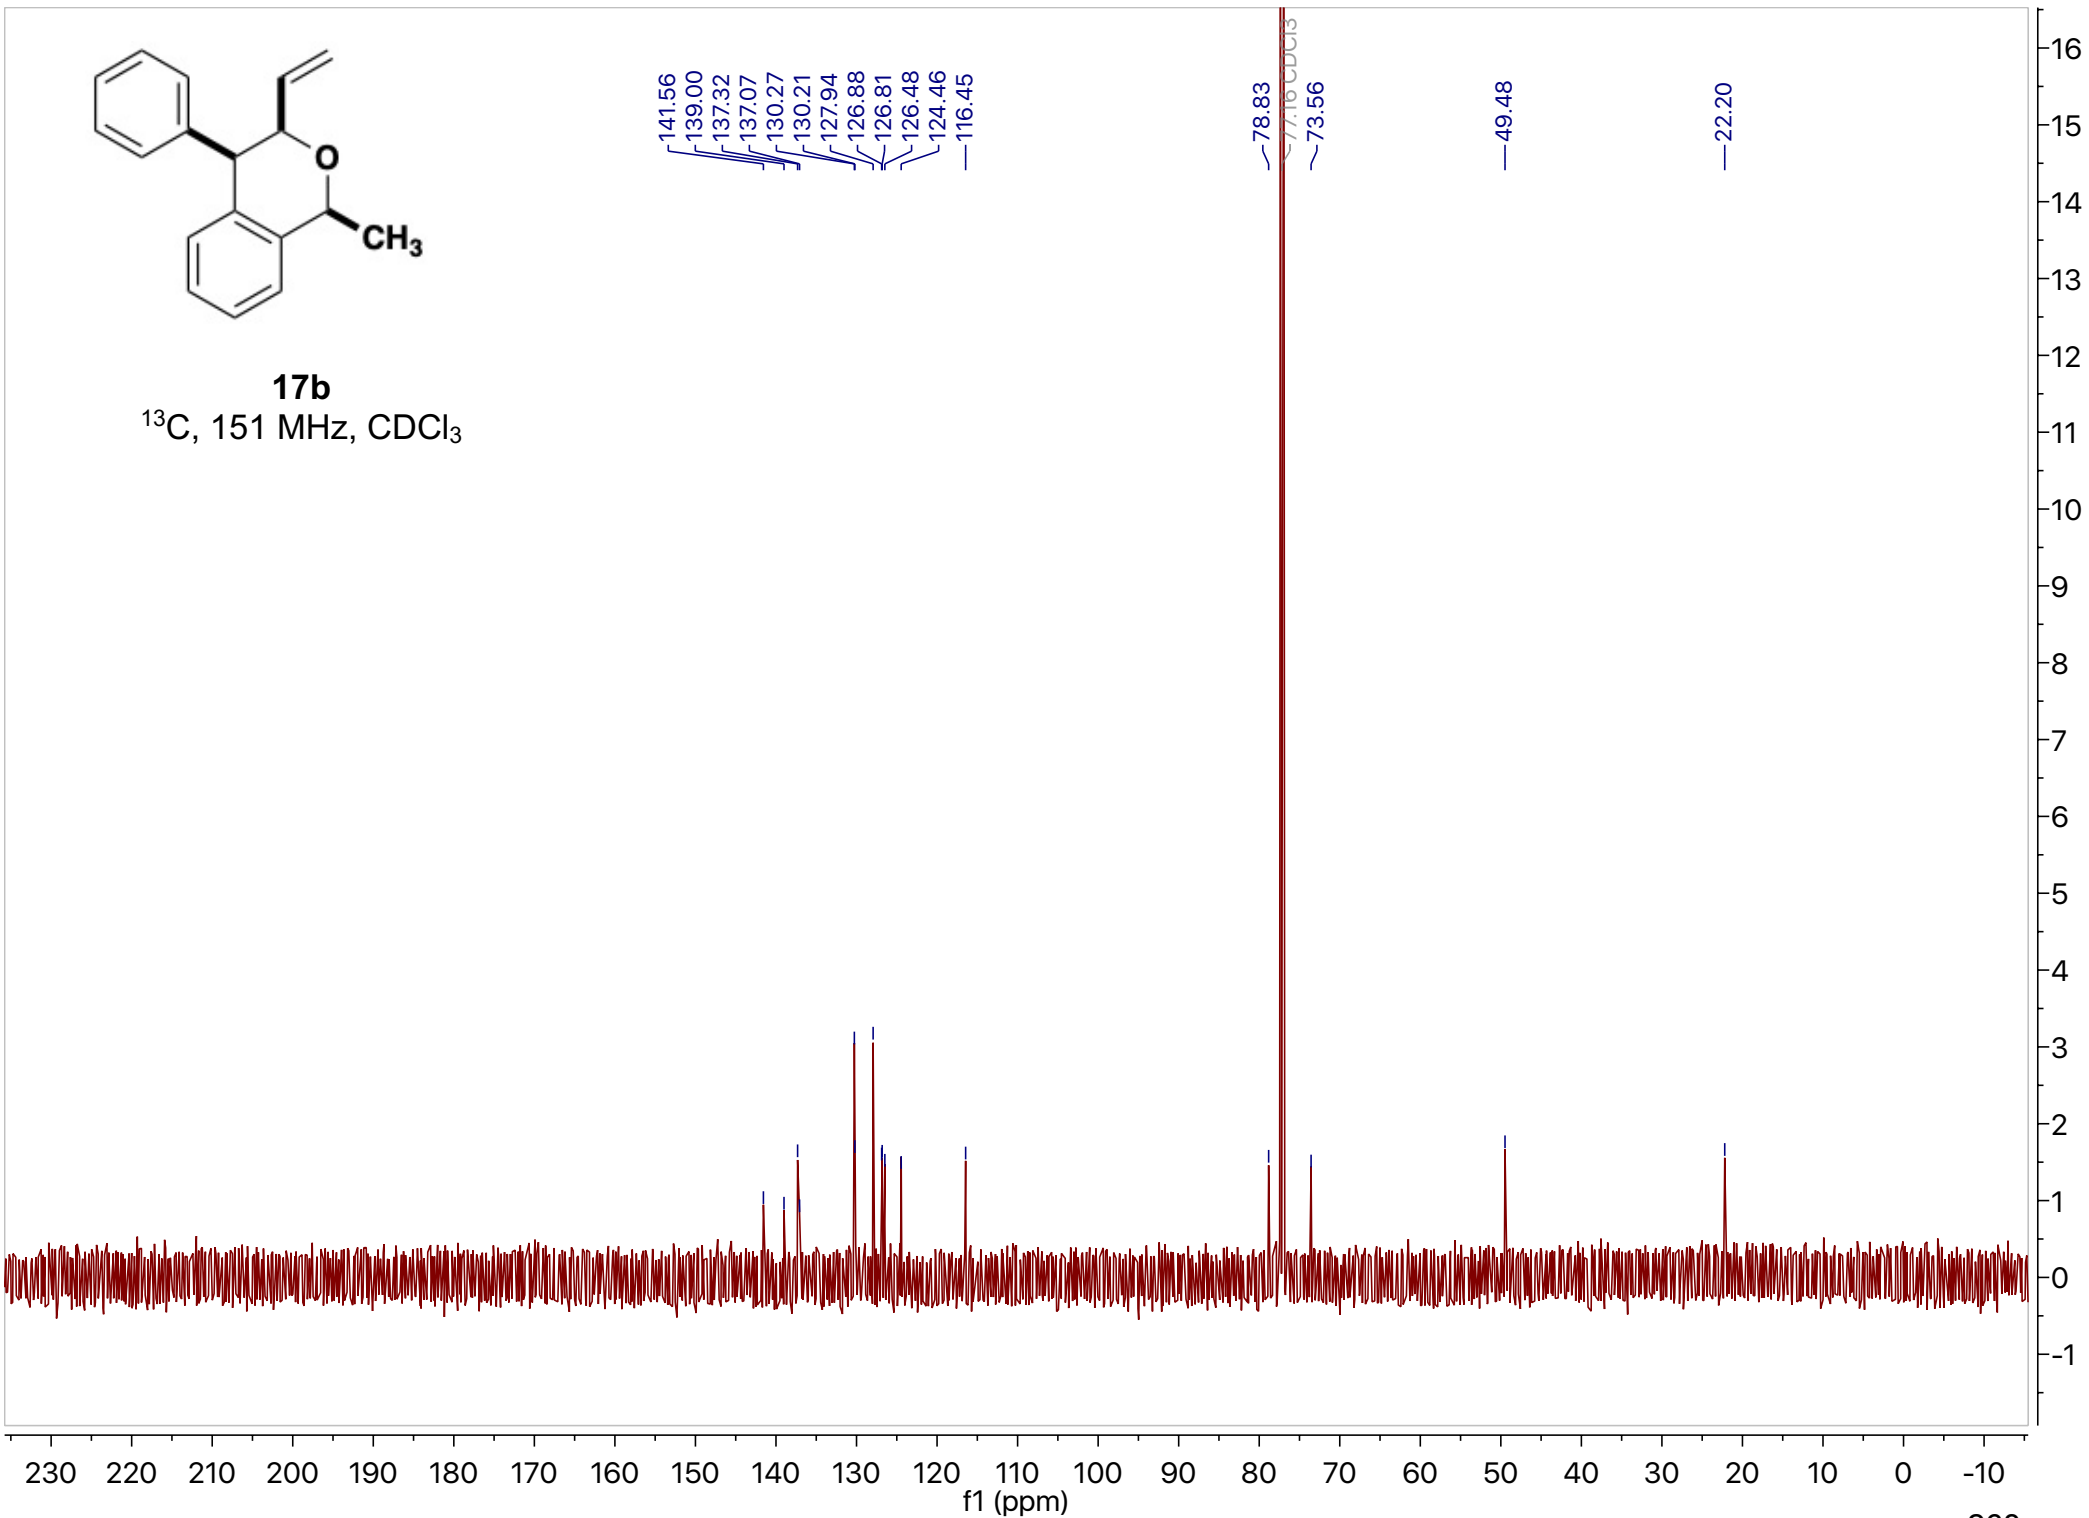

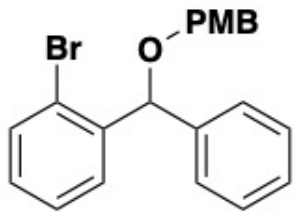

**79**

$^1\text{H}$ , 400 MHz,  $\text{CDCl}_3$

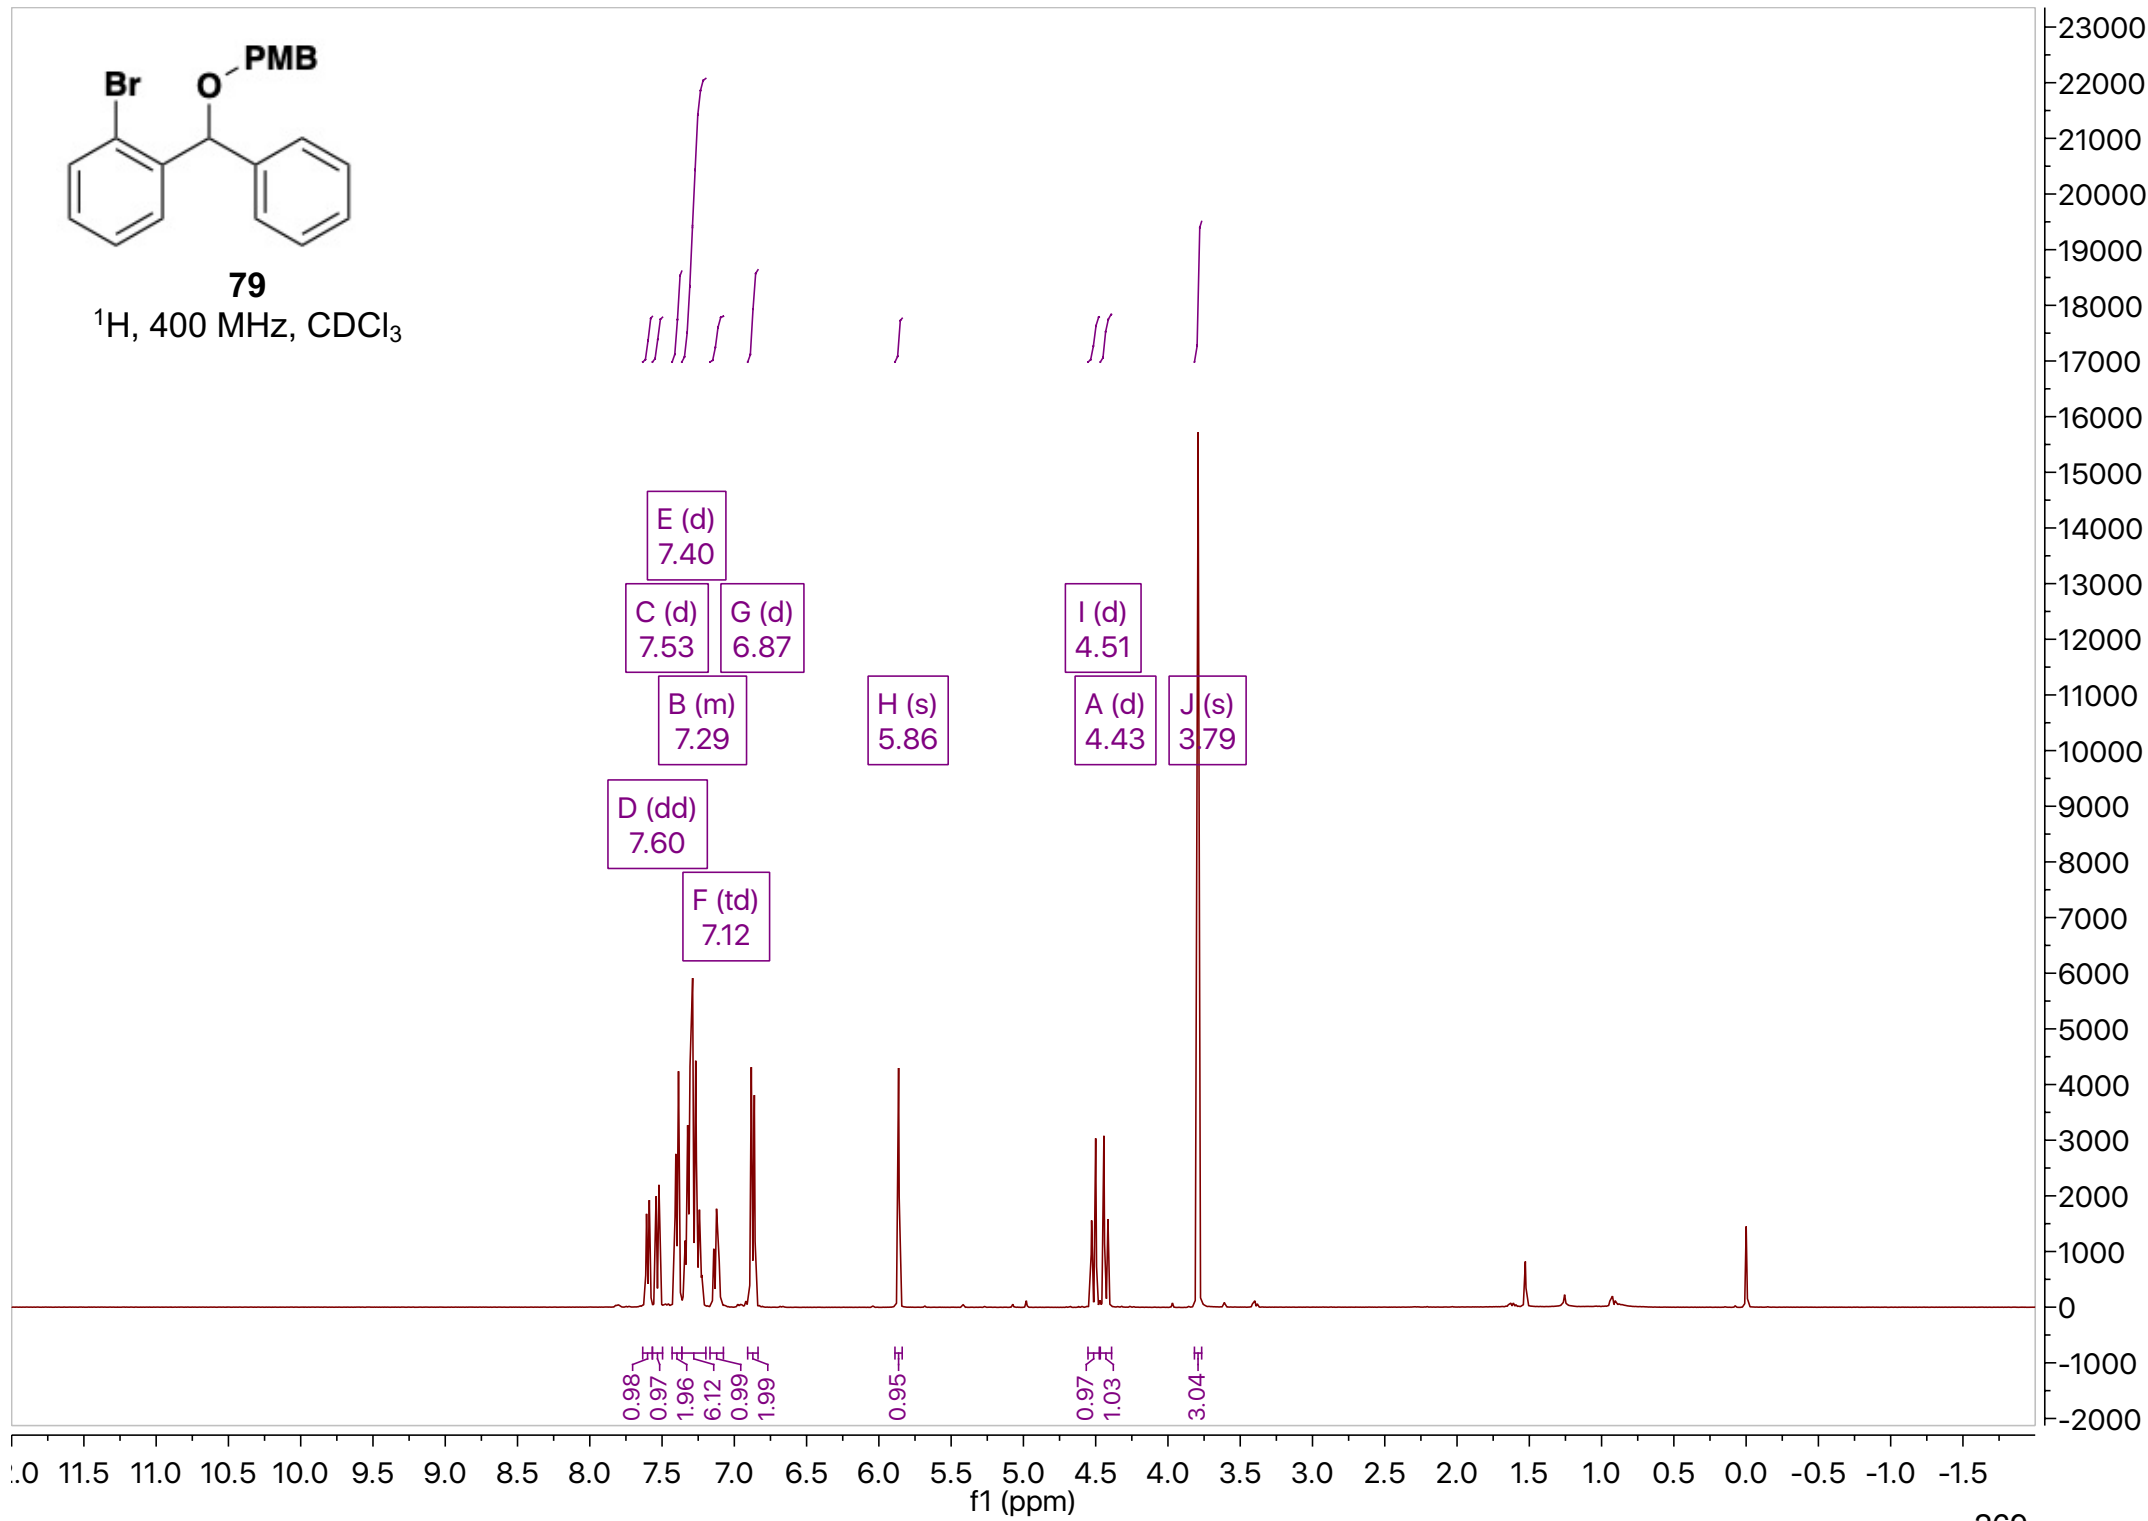

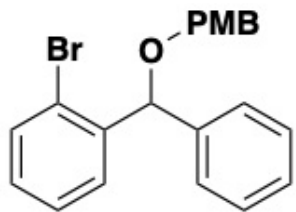

**79**

$^{13}\text{C}$ , 101 MHz,  $\text{CDCl}_3$

159.36  
141.29  
140.88  
132.88  
130.31  
129.67  
129.14  
129.09  
128.44  
127.88  
127.72  
127.59  
123.80  
113.90

80.78

70.75

55.41

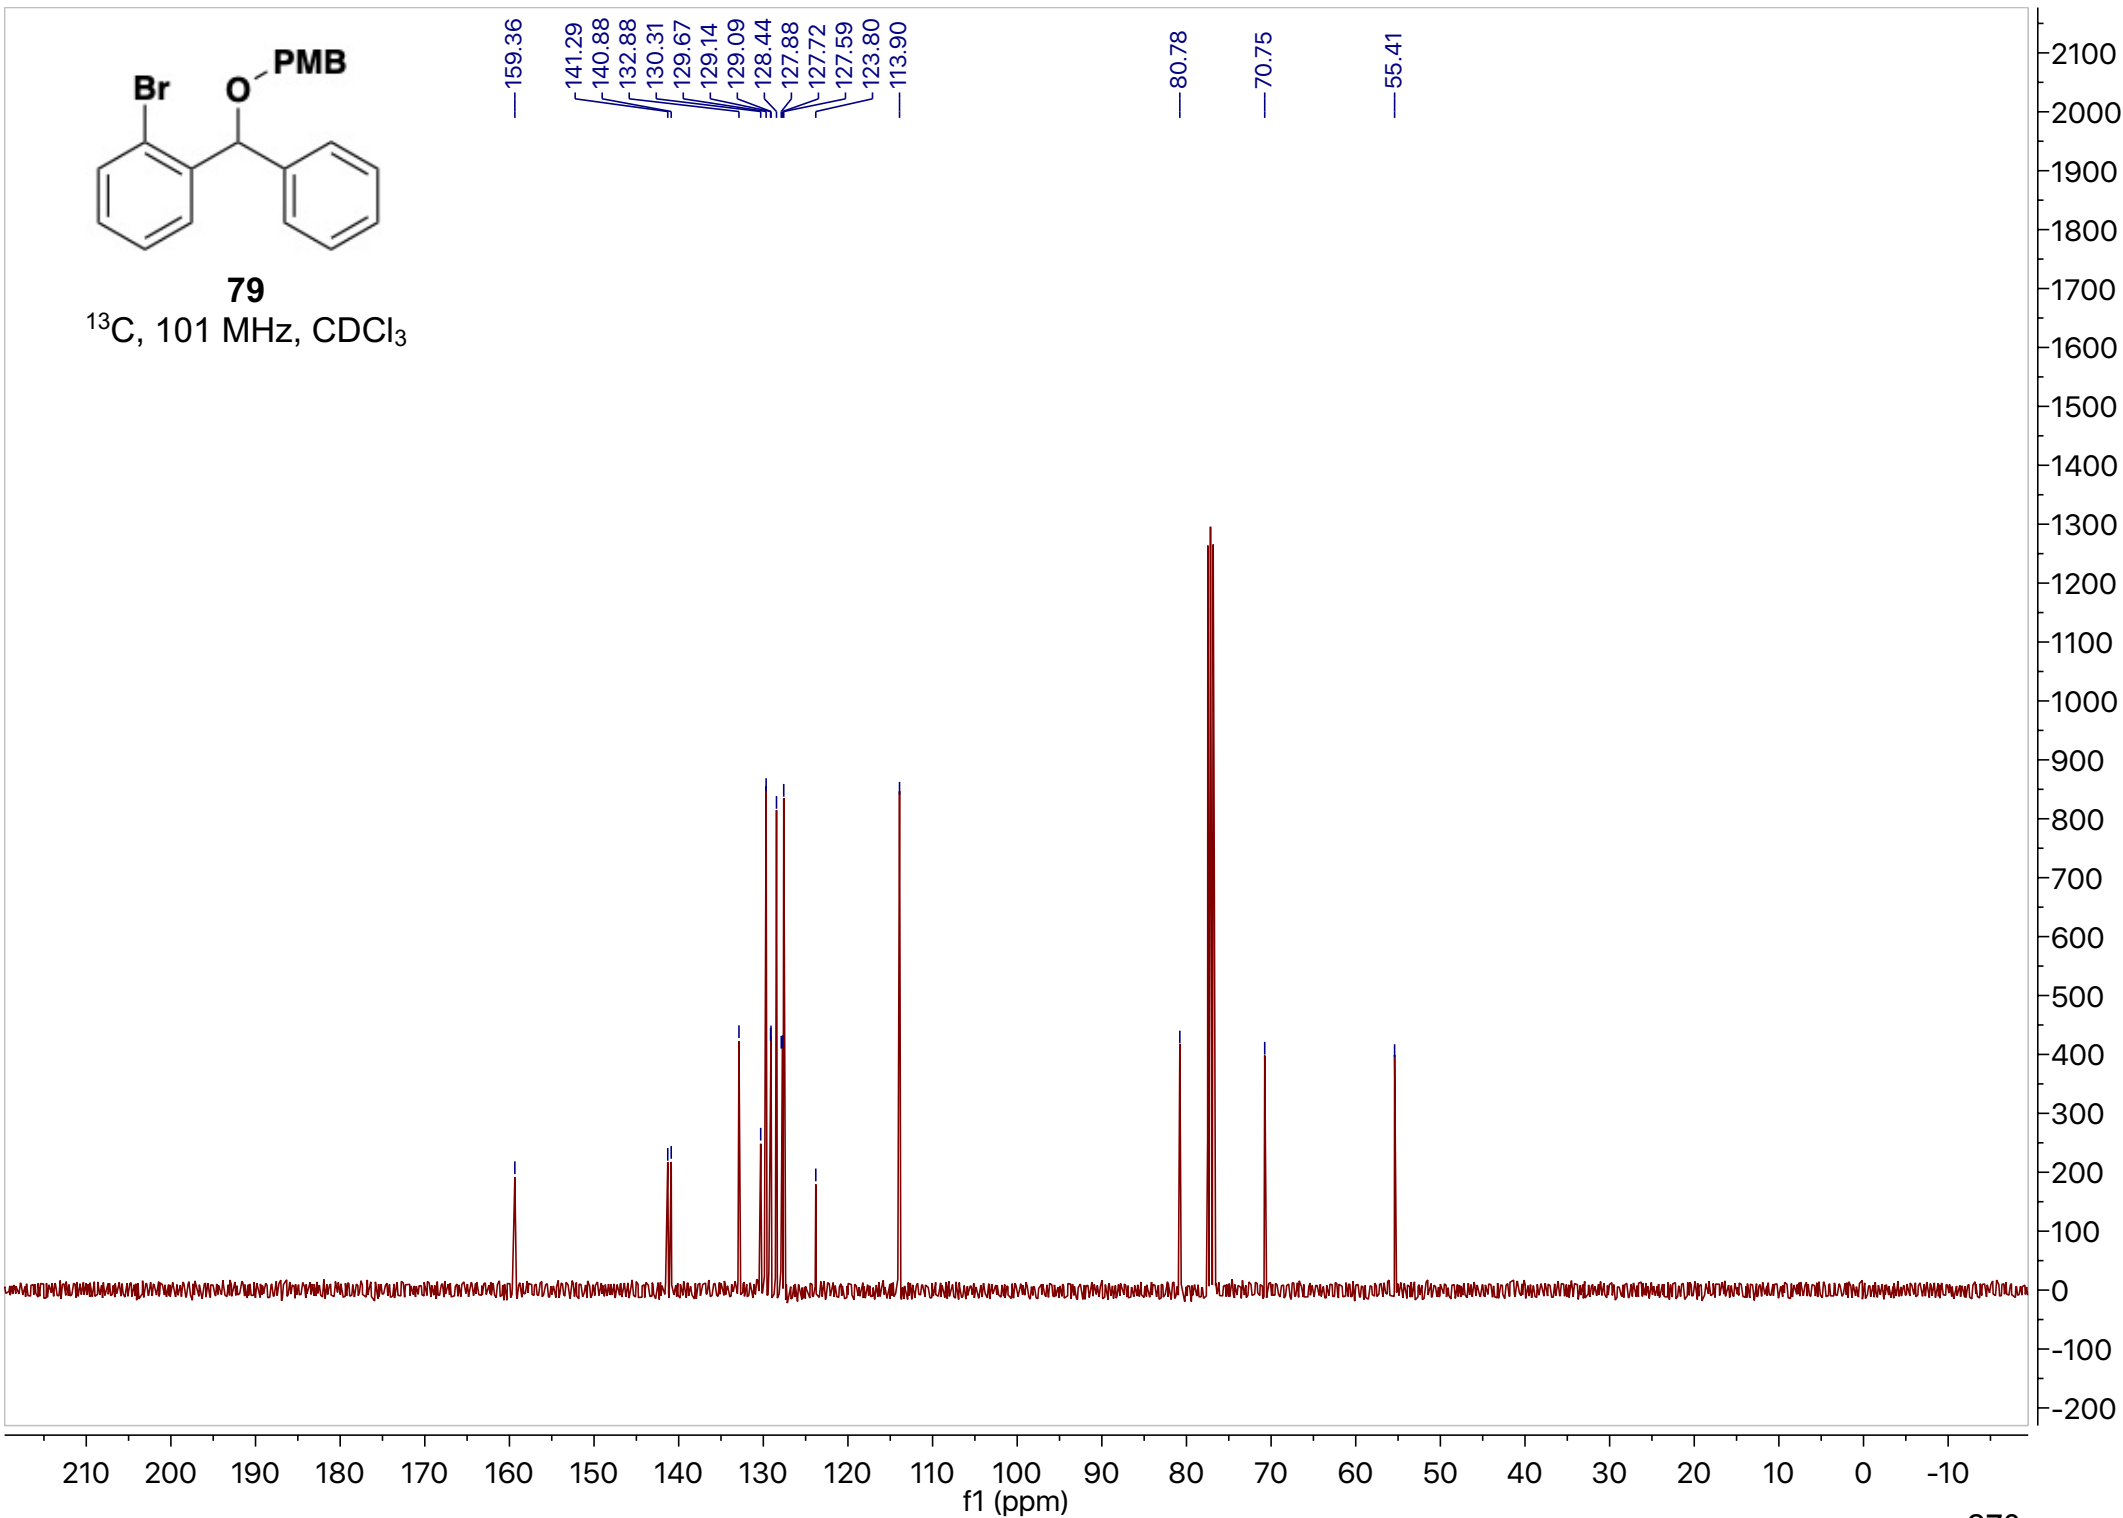

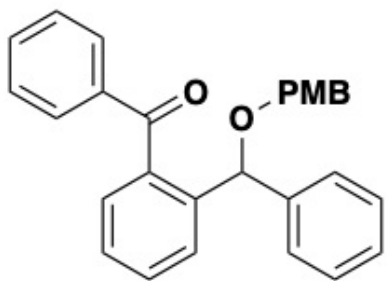

**80**

$^1\text{H}$ , 400 MHz,  $\text{CDCl}_3$

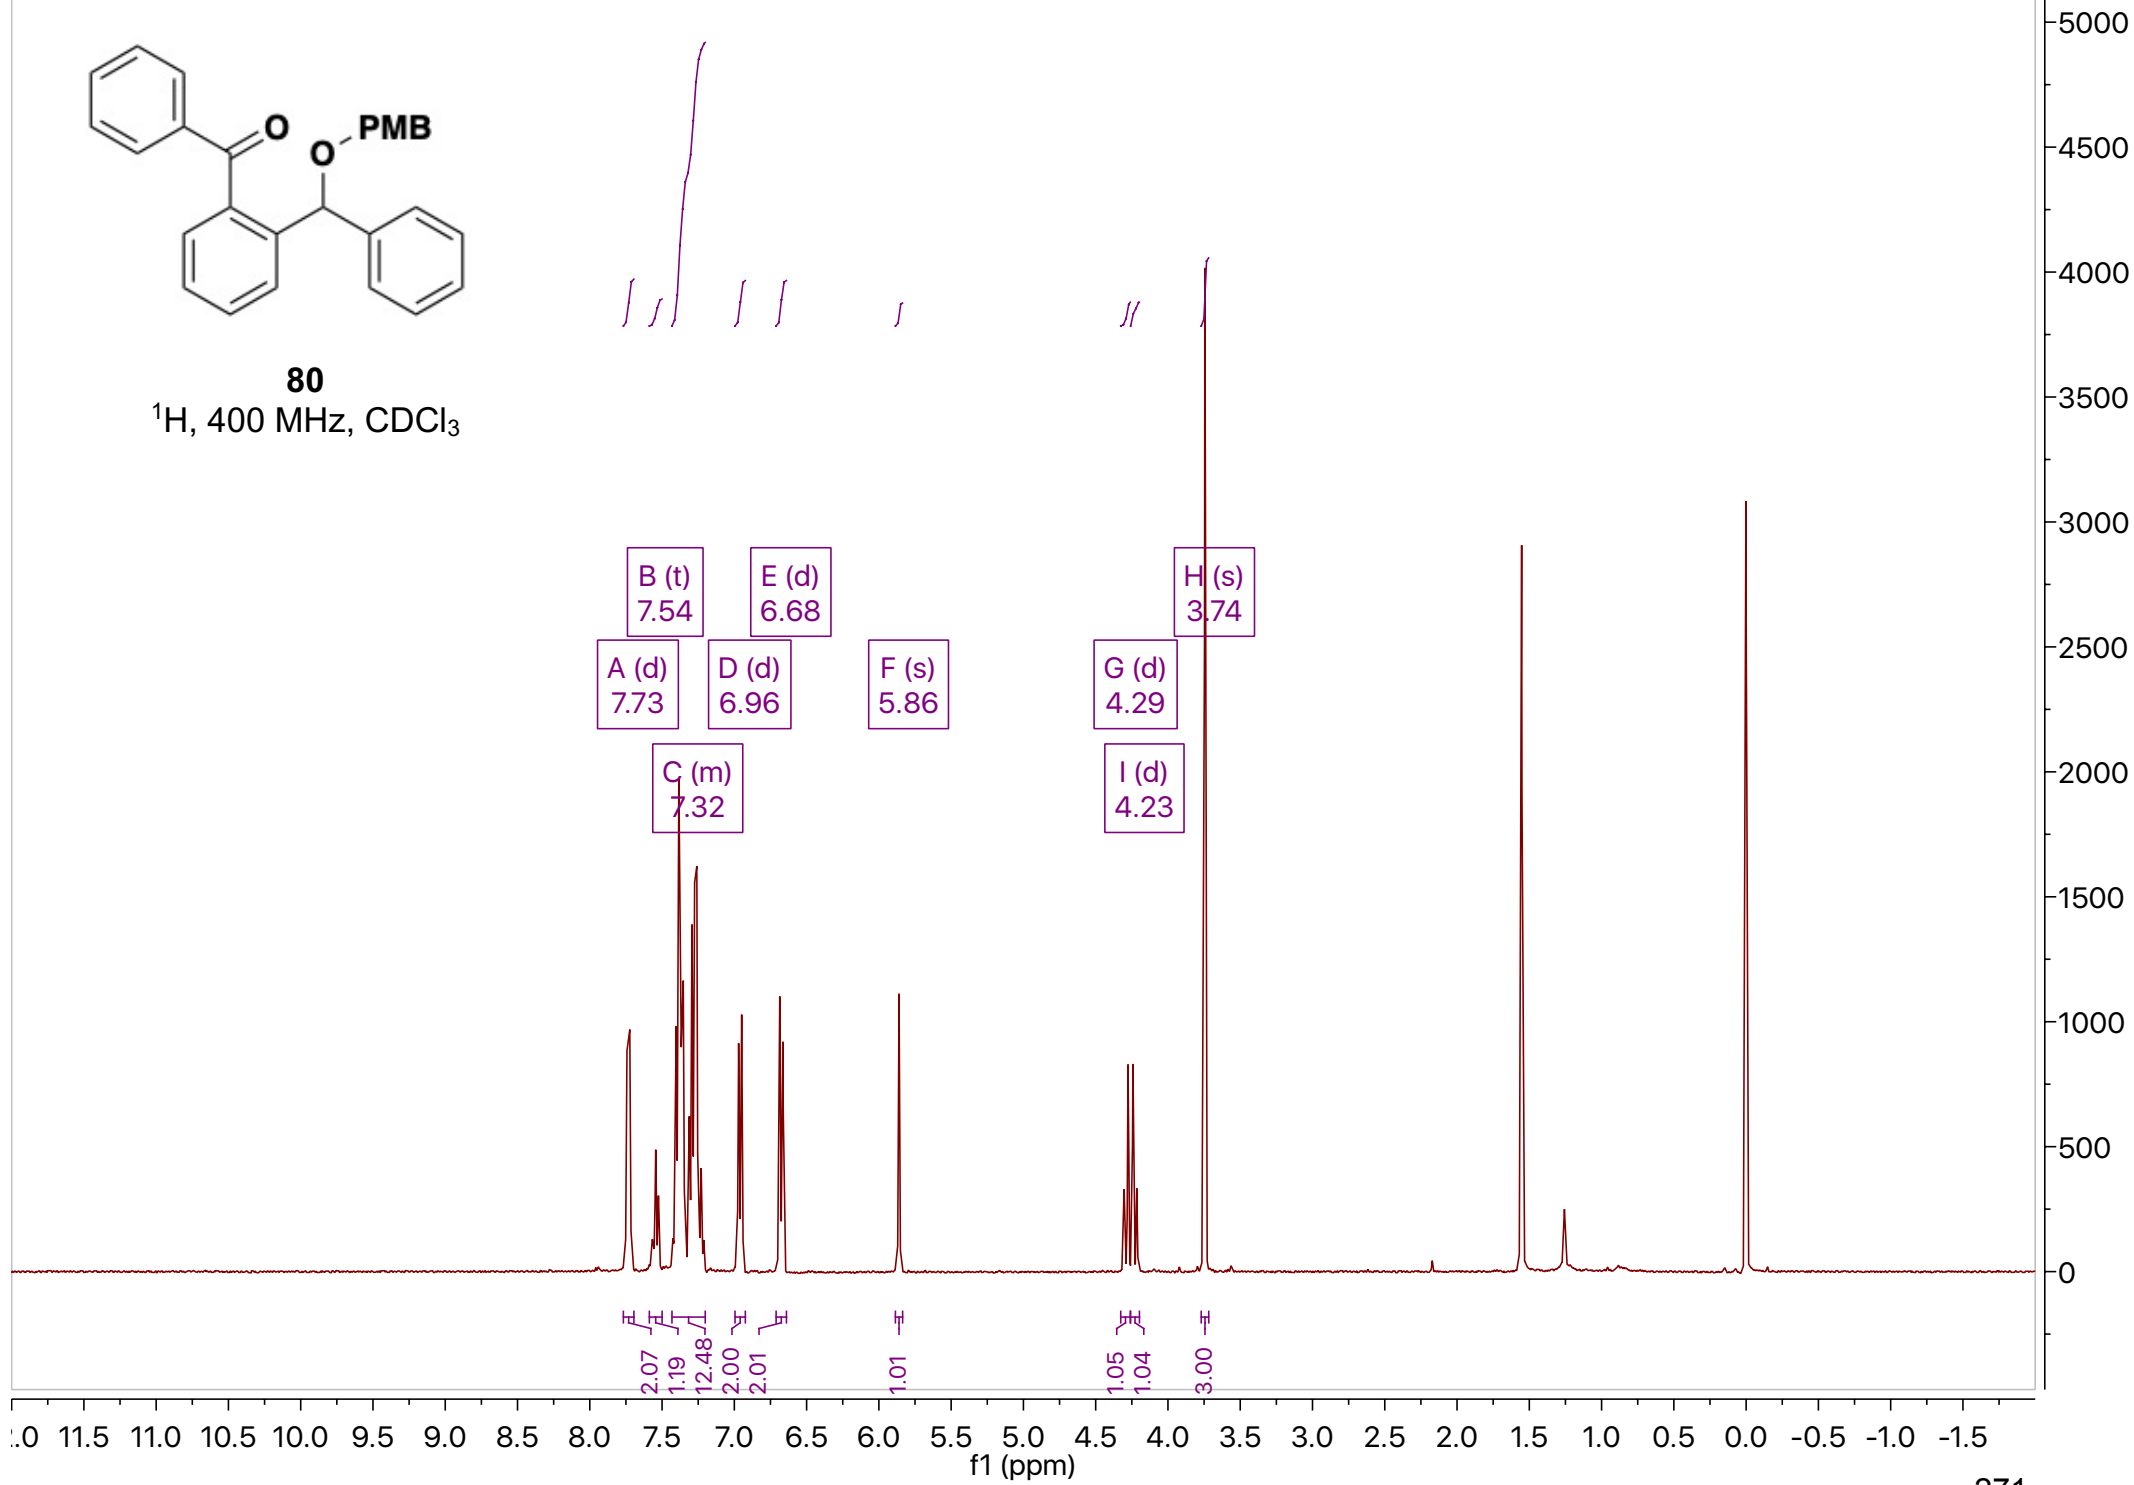

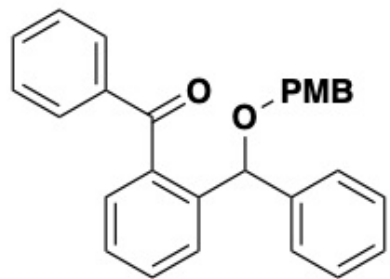

**80**

$^{13}\text{C}$ , 101 MHz,  $\text{CDCl}_3$

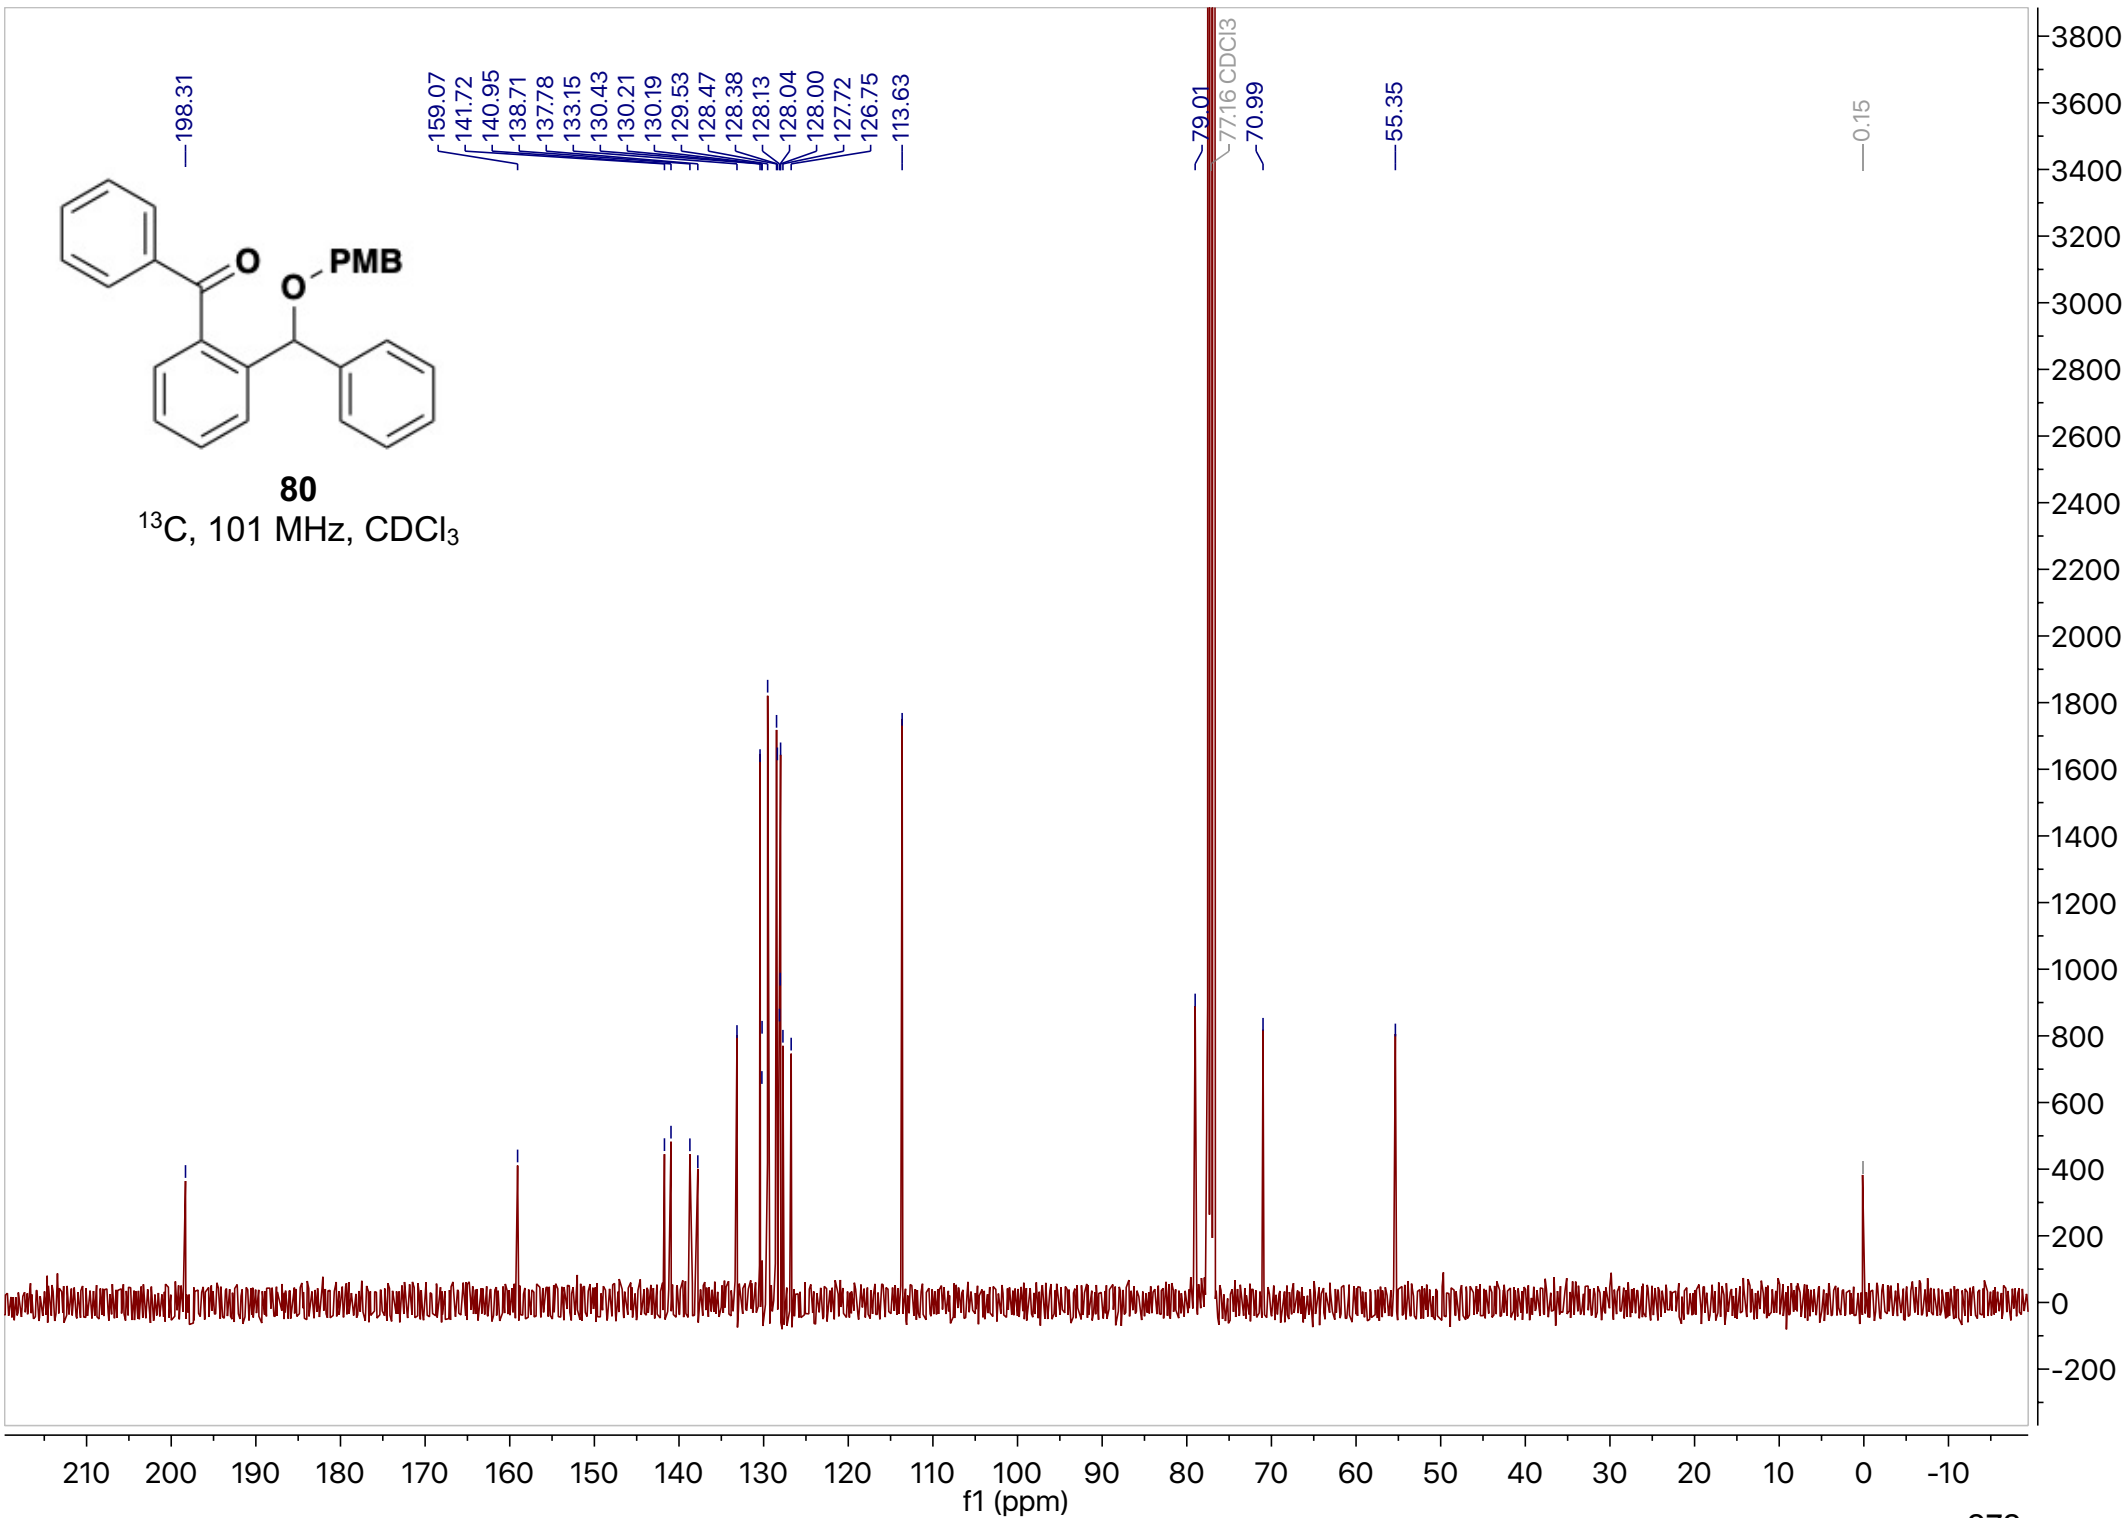

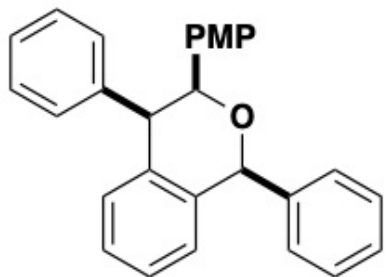

<sup>1</sup>H, 600 MHz, CDCl<sub>3</sub>

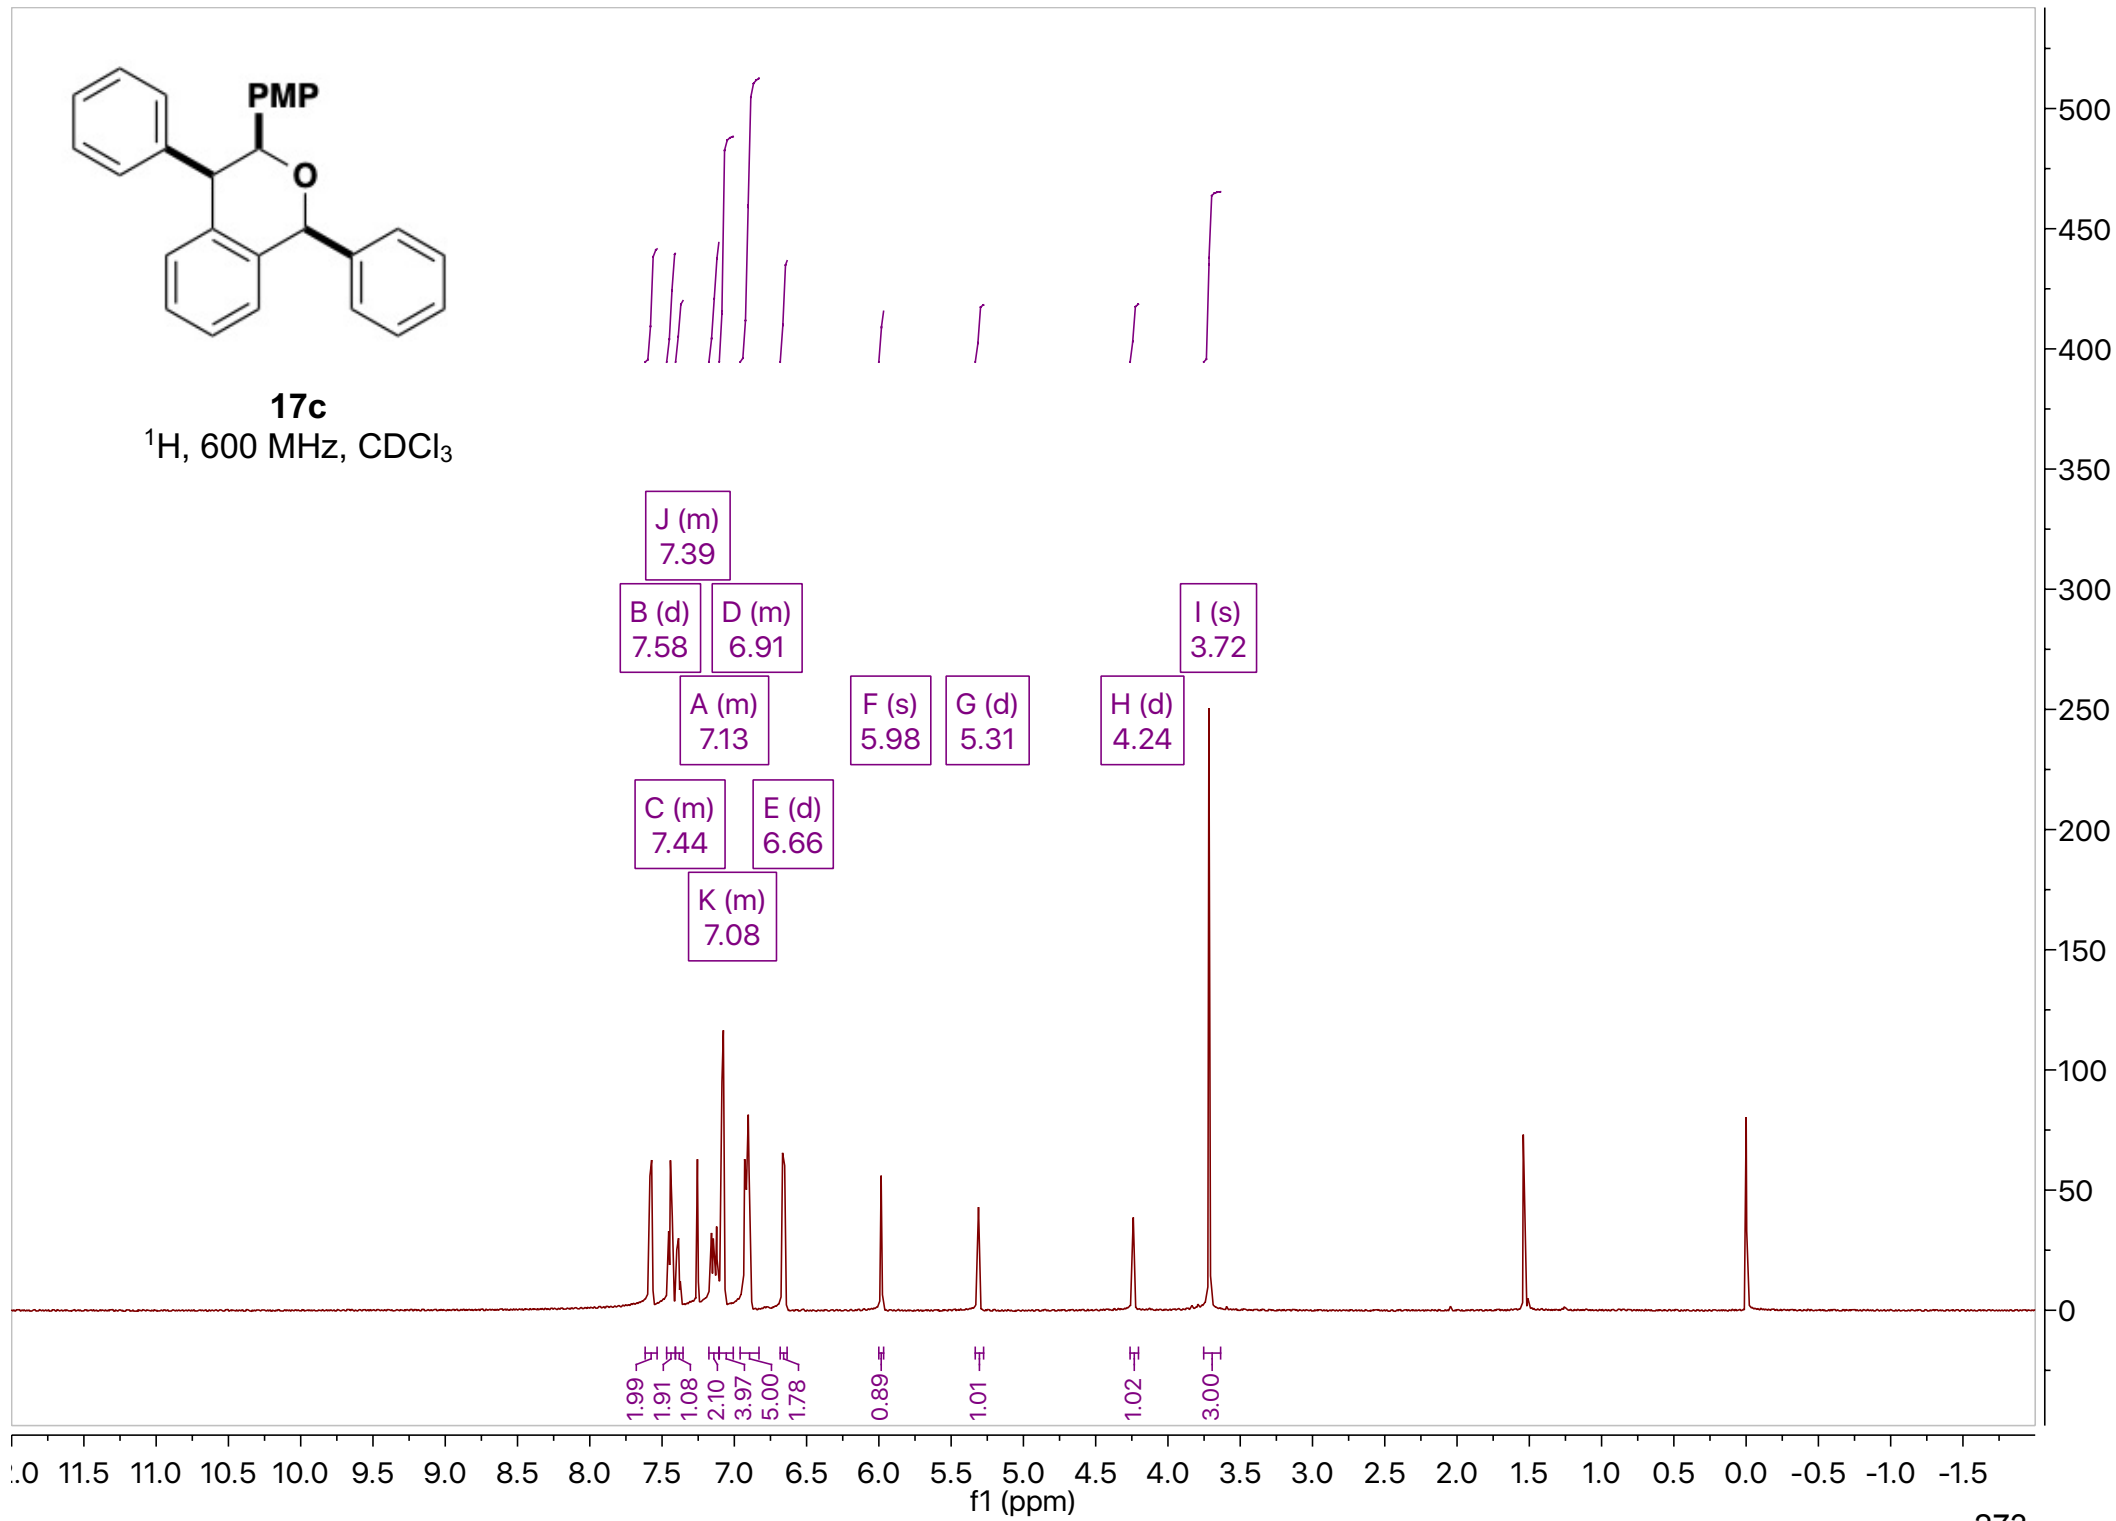

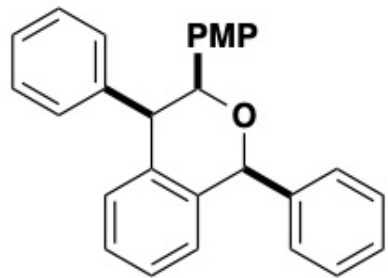

**PMP**

**17c**

$^{13}\text{C}$ , 200 MHz,  $\text{CDCl}_3$

158.55  
141.84  
141.32  
137.79  
137.54  
132.67  
130.54  
130.48  
129.08  
128.68  
128.40  
127.47  
127.42  
127.22  
126.66  
126.47  
126.22  
113.12

82.44  
80.32  
77.16  
55.30  
50.75

0.15

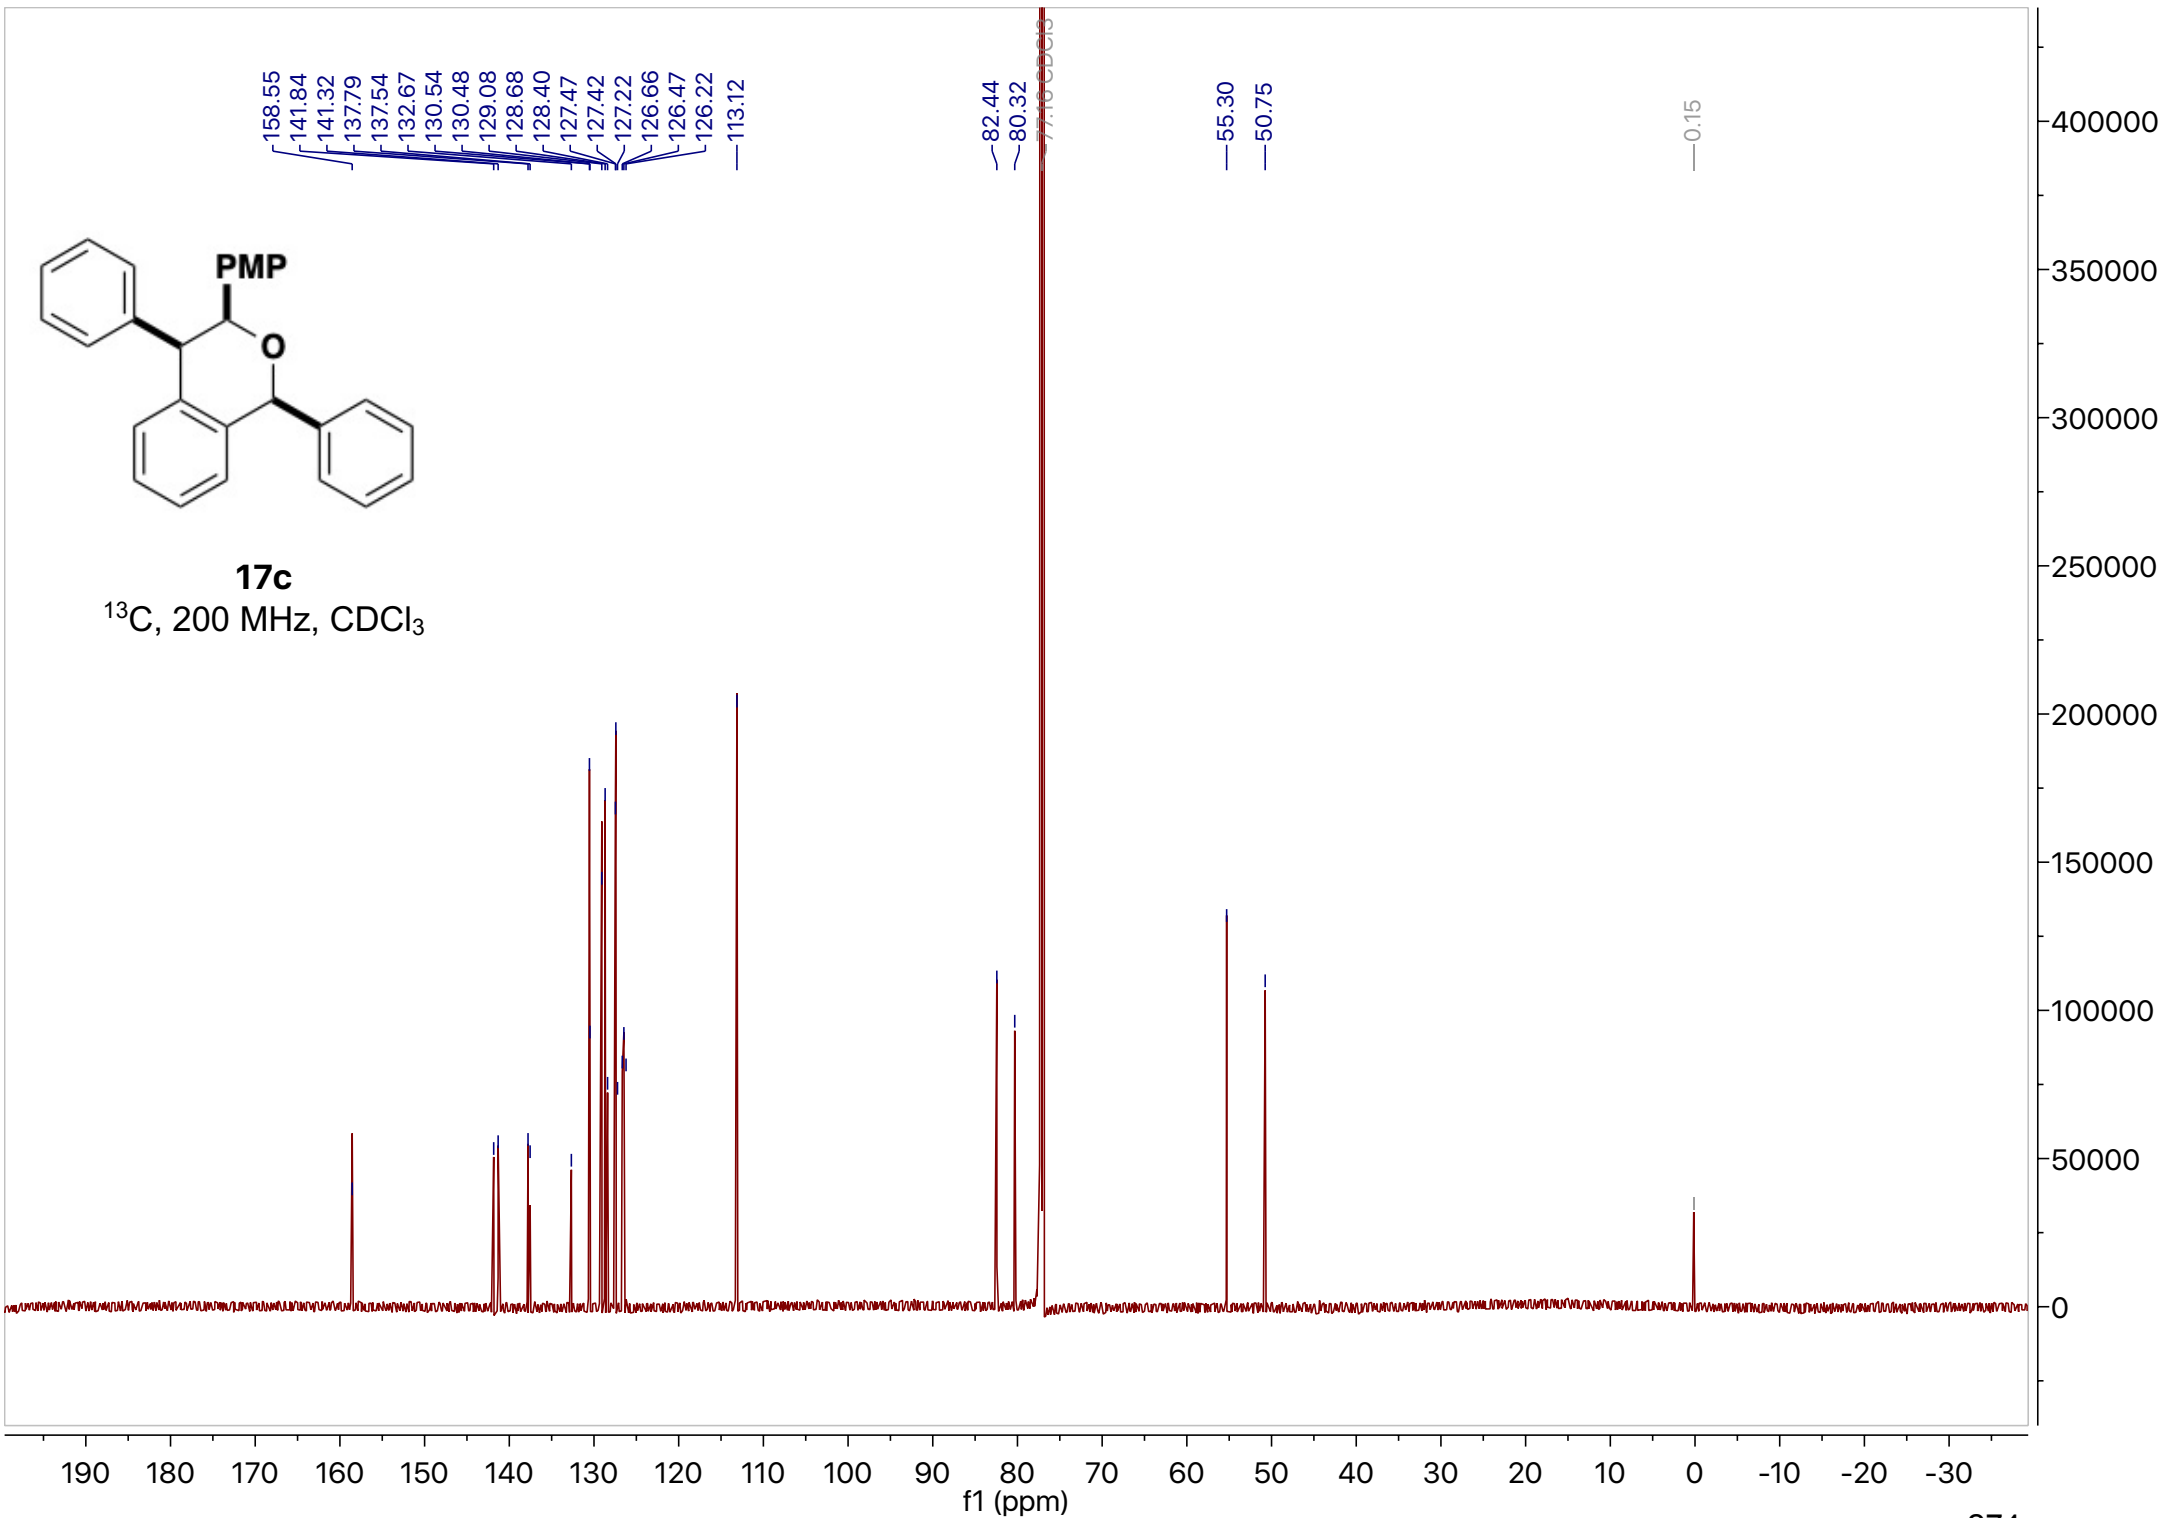



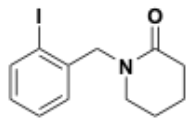

**81**

<sup>1</sup>H, 600 MHz, CDCl<sub>3</sub>

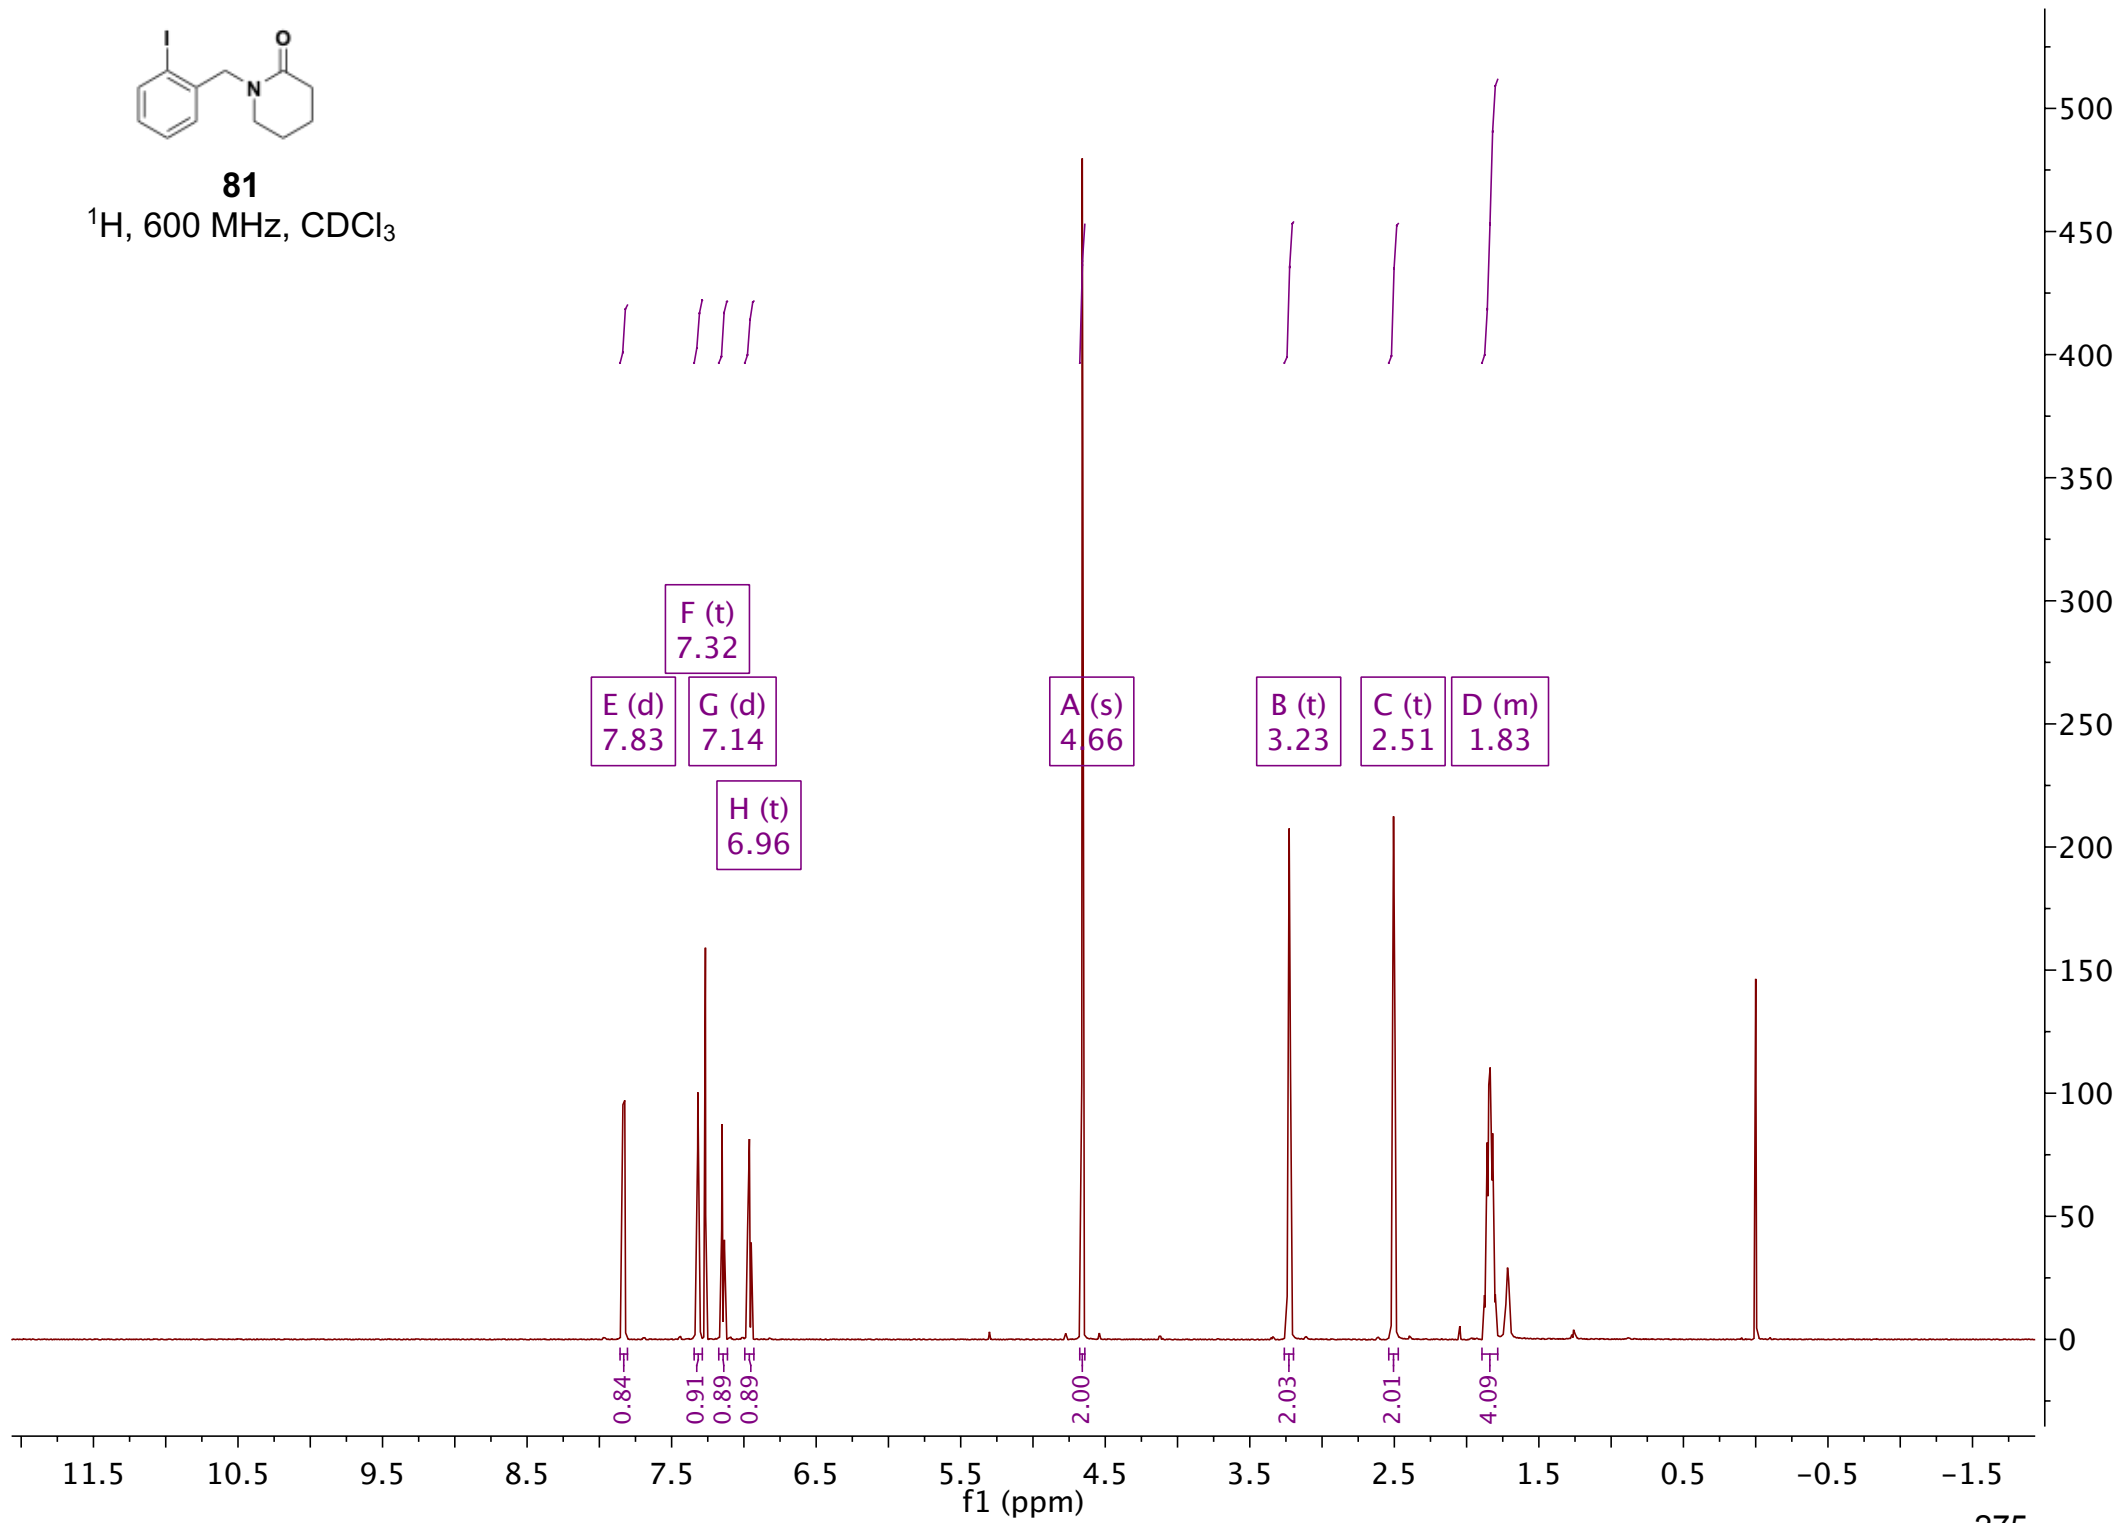

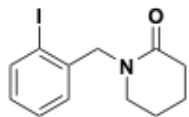

**81**

$^{13}\text{C}$ , 150 MHz,  $\text{CDCl}_3$

—170.21

139.64

139.05

129.07

128.72

128.03

—99.13

—54.90

—47.90

—32.57

23.38

—21.52

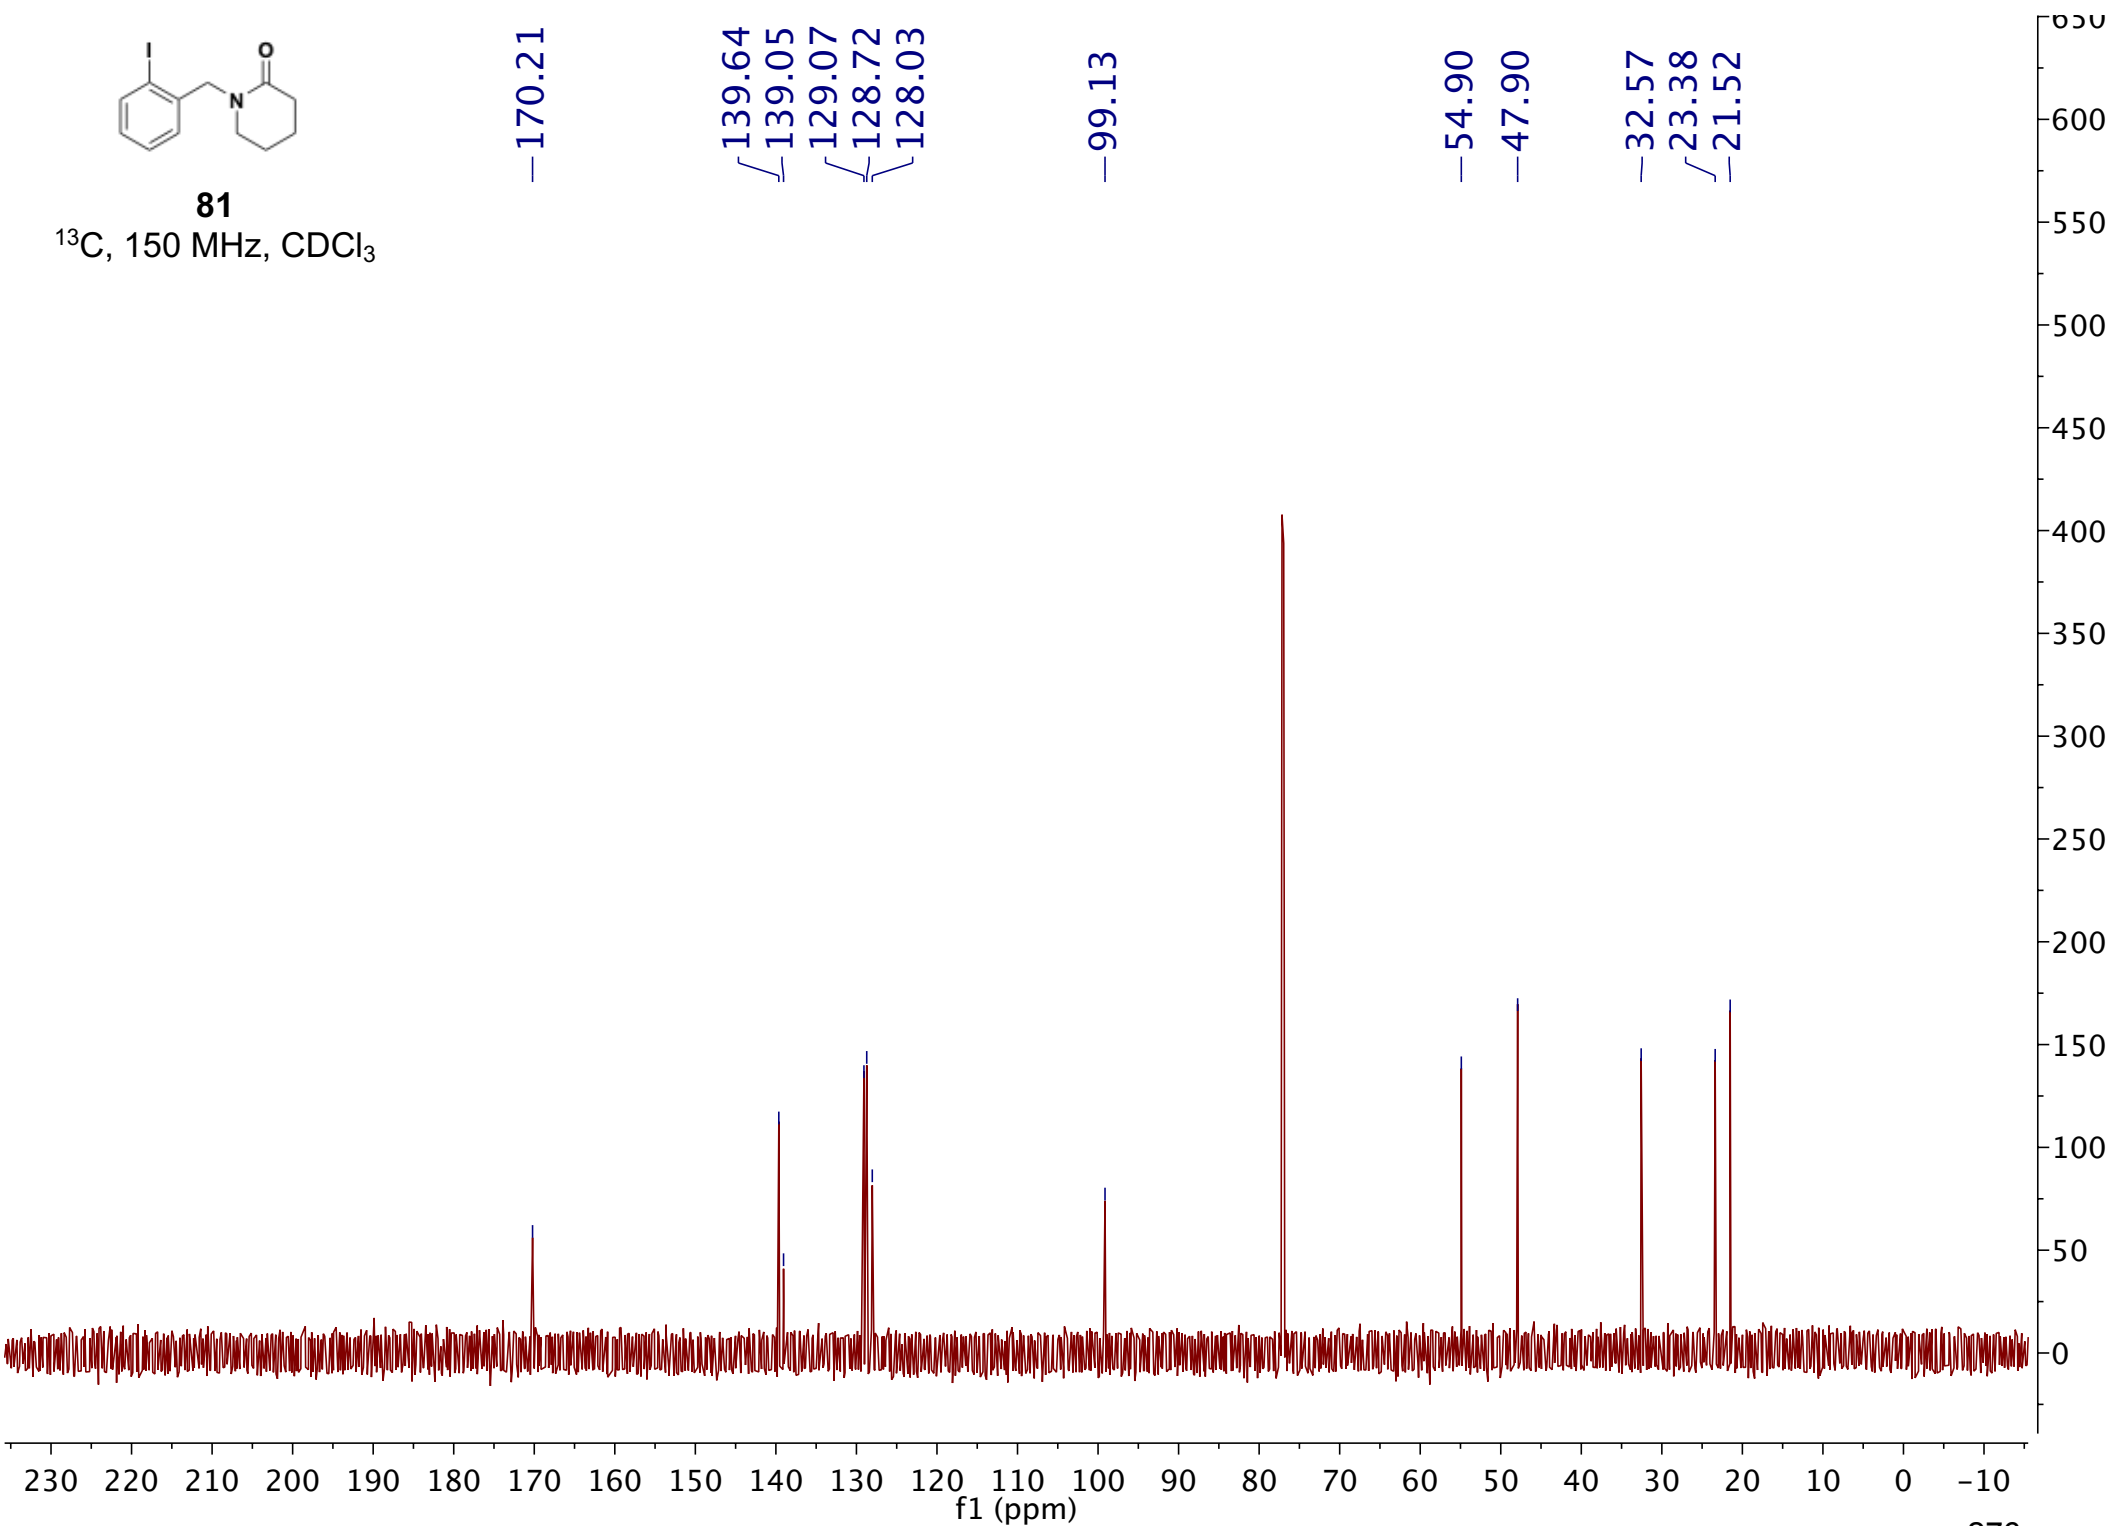

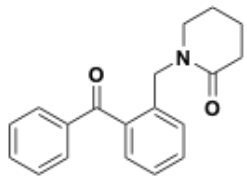

**82**

$^1\text{H}$ , 600 MHz,  $\text{CDCl}_3$

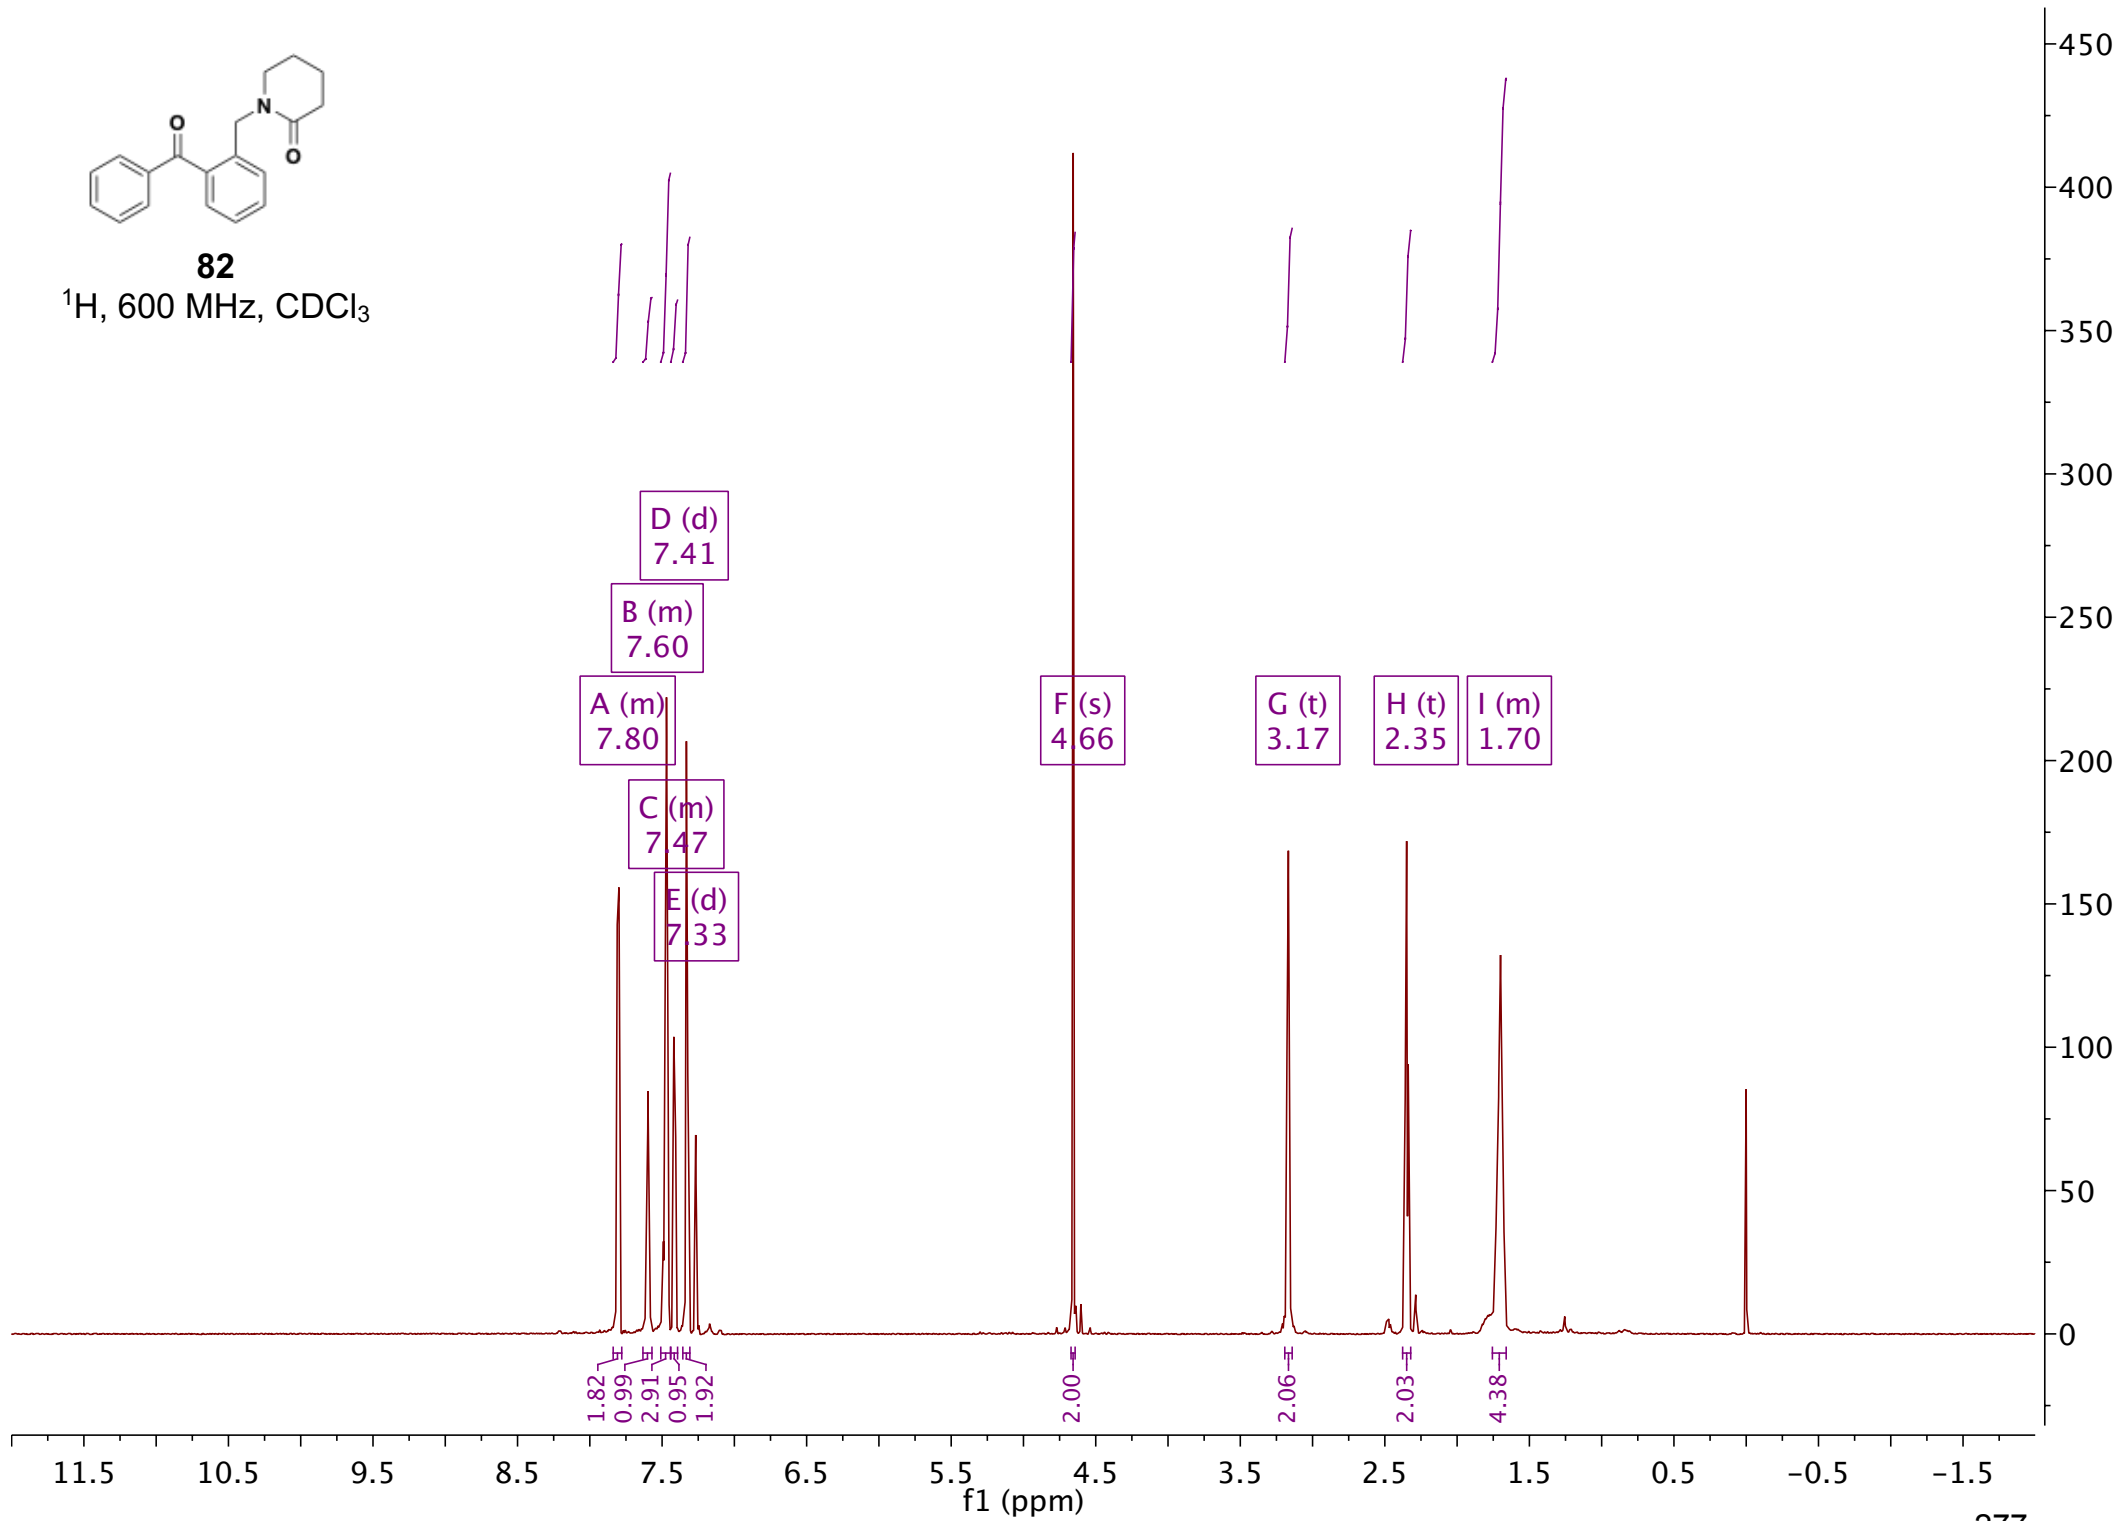

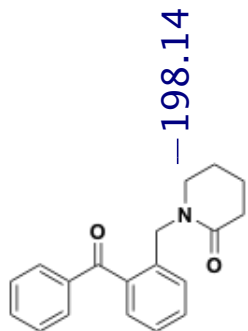

**82**

$^{13}\text{C}$ , 150 MHz,  $\text{CDCl}_3$

198.14

170.32

138.46

137.58

136.83

133.58

130.83

130.32

128.73

128.70

128.68

126.67

48.02

47.71

32.50

23.24

21.43

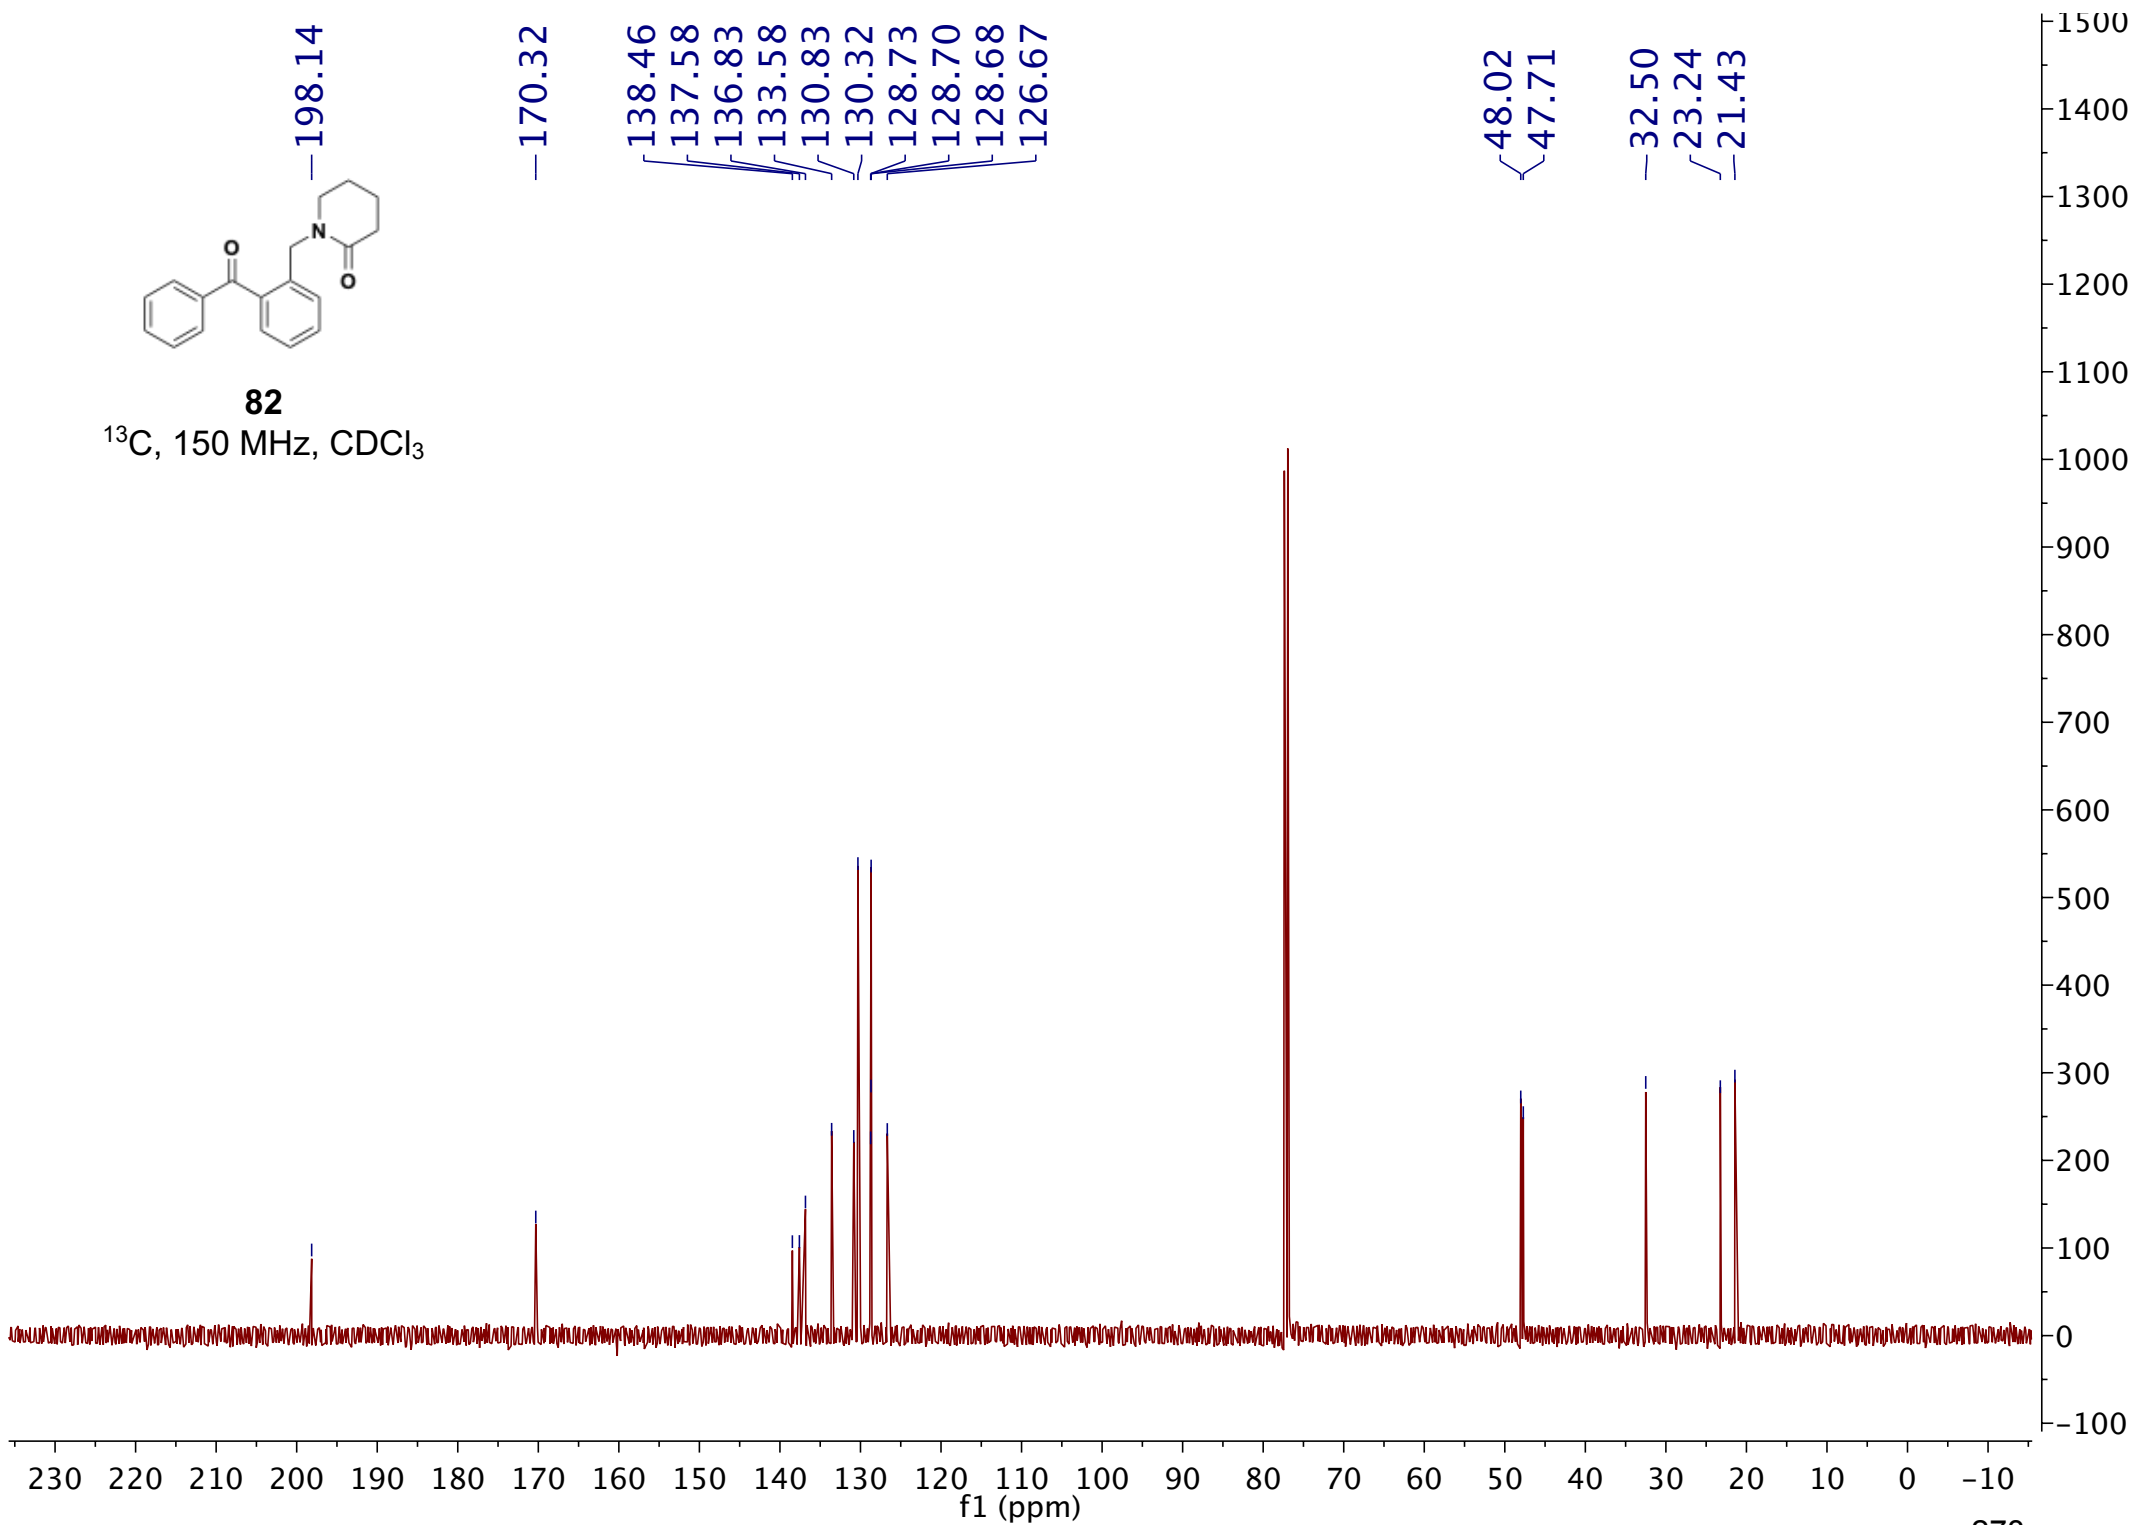

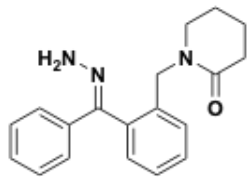

**22a**

$^1\text{H}$ , 600 MHz,  $\text{CDCl}_3$

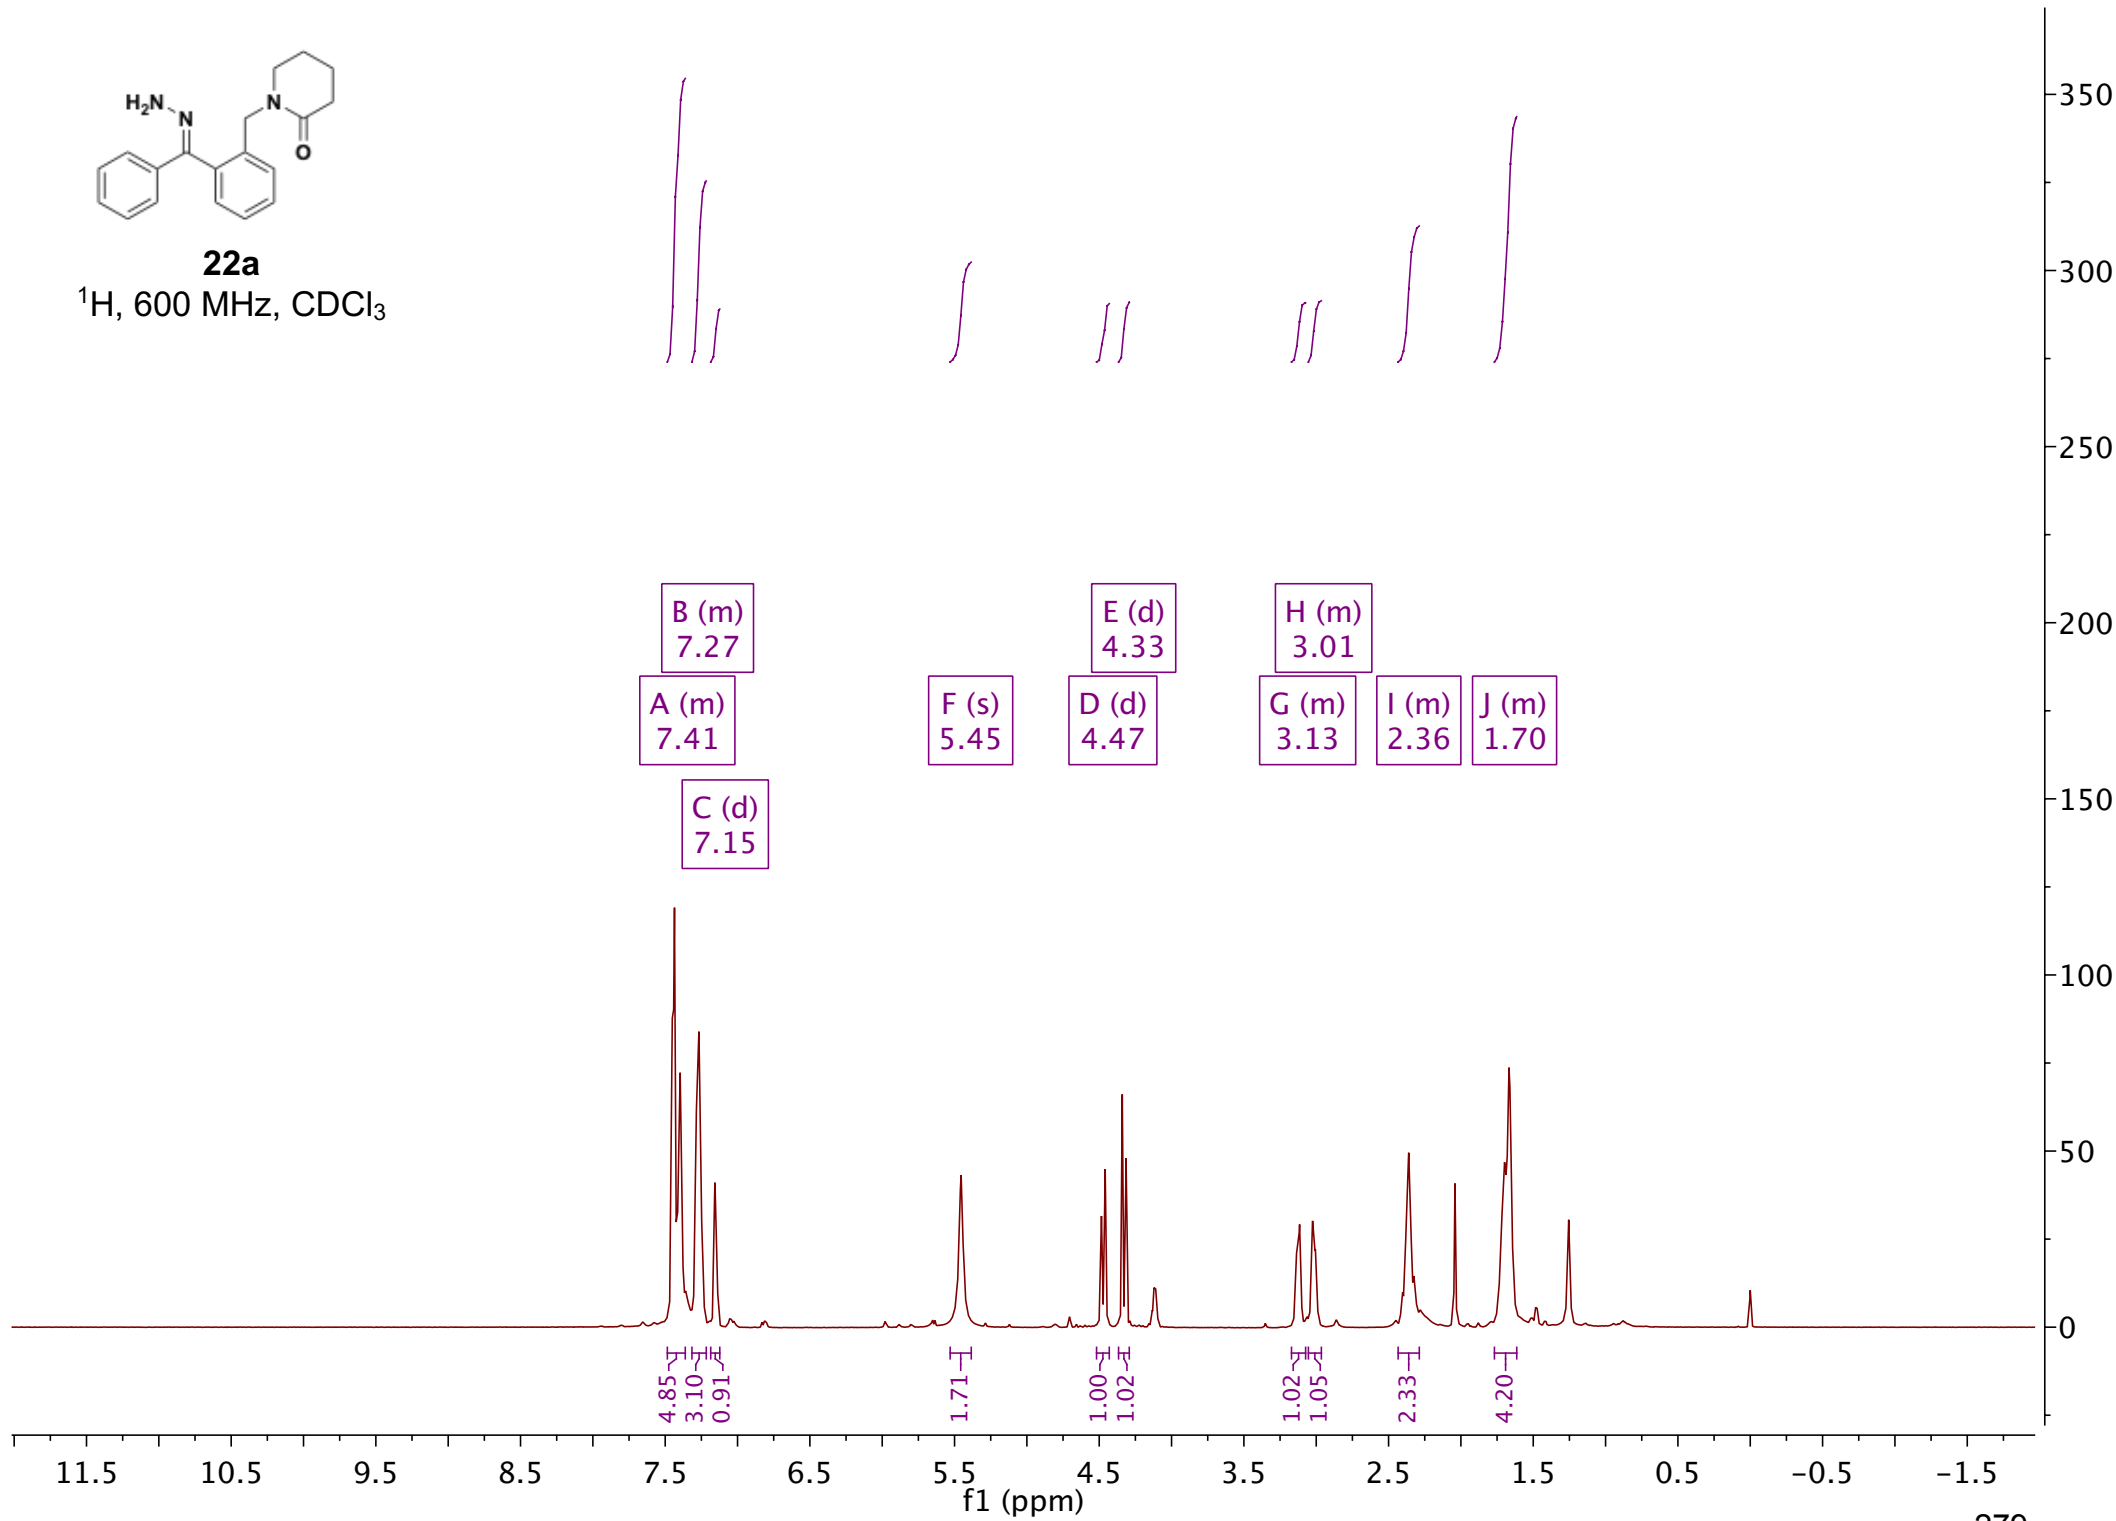

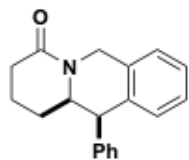

**23a**

$^1\text{H}$ , 400 MHz,  $\text{CDCl}_3$

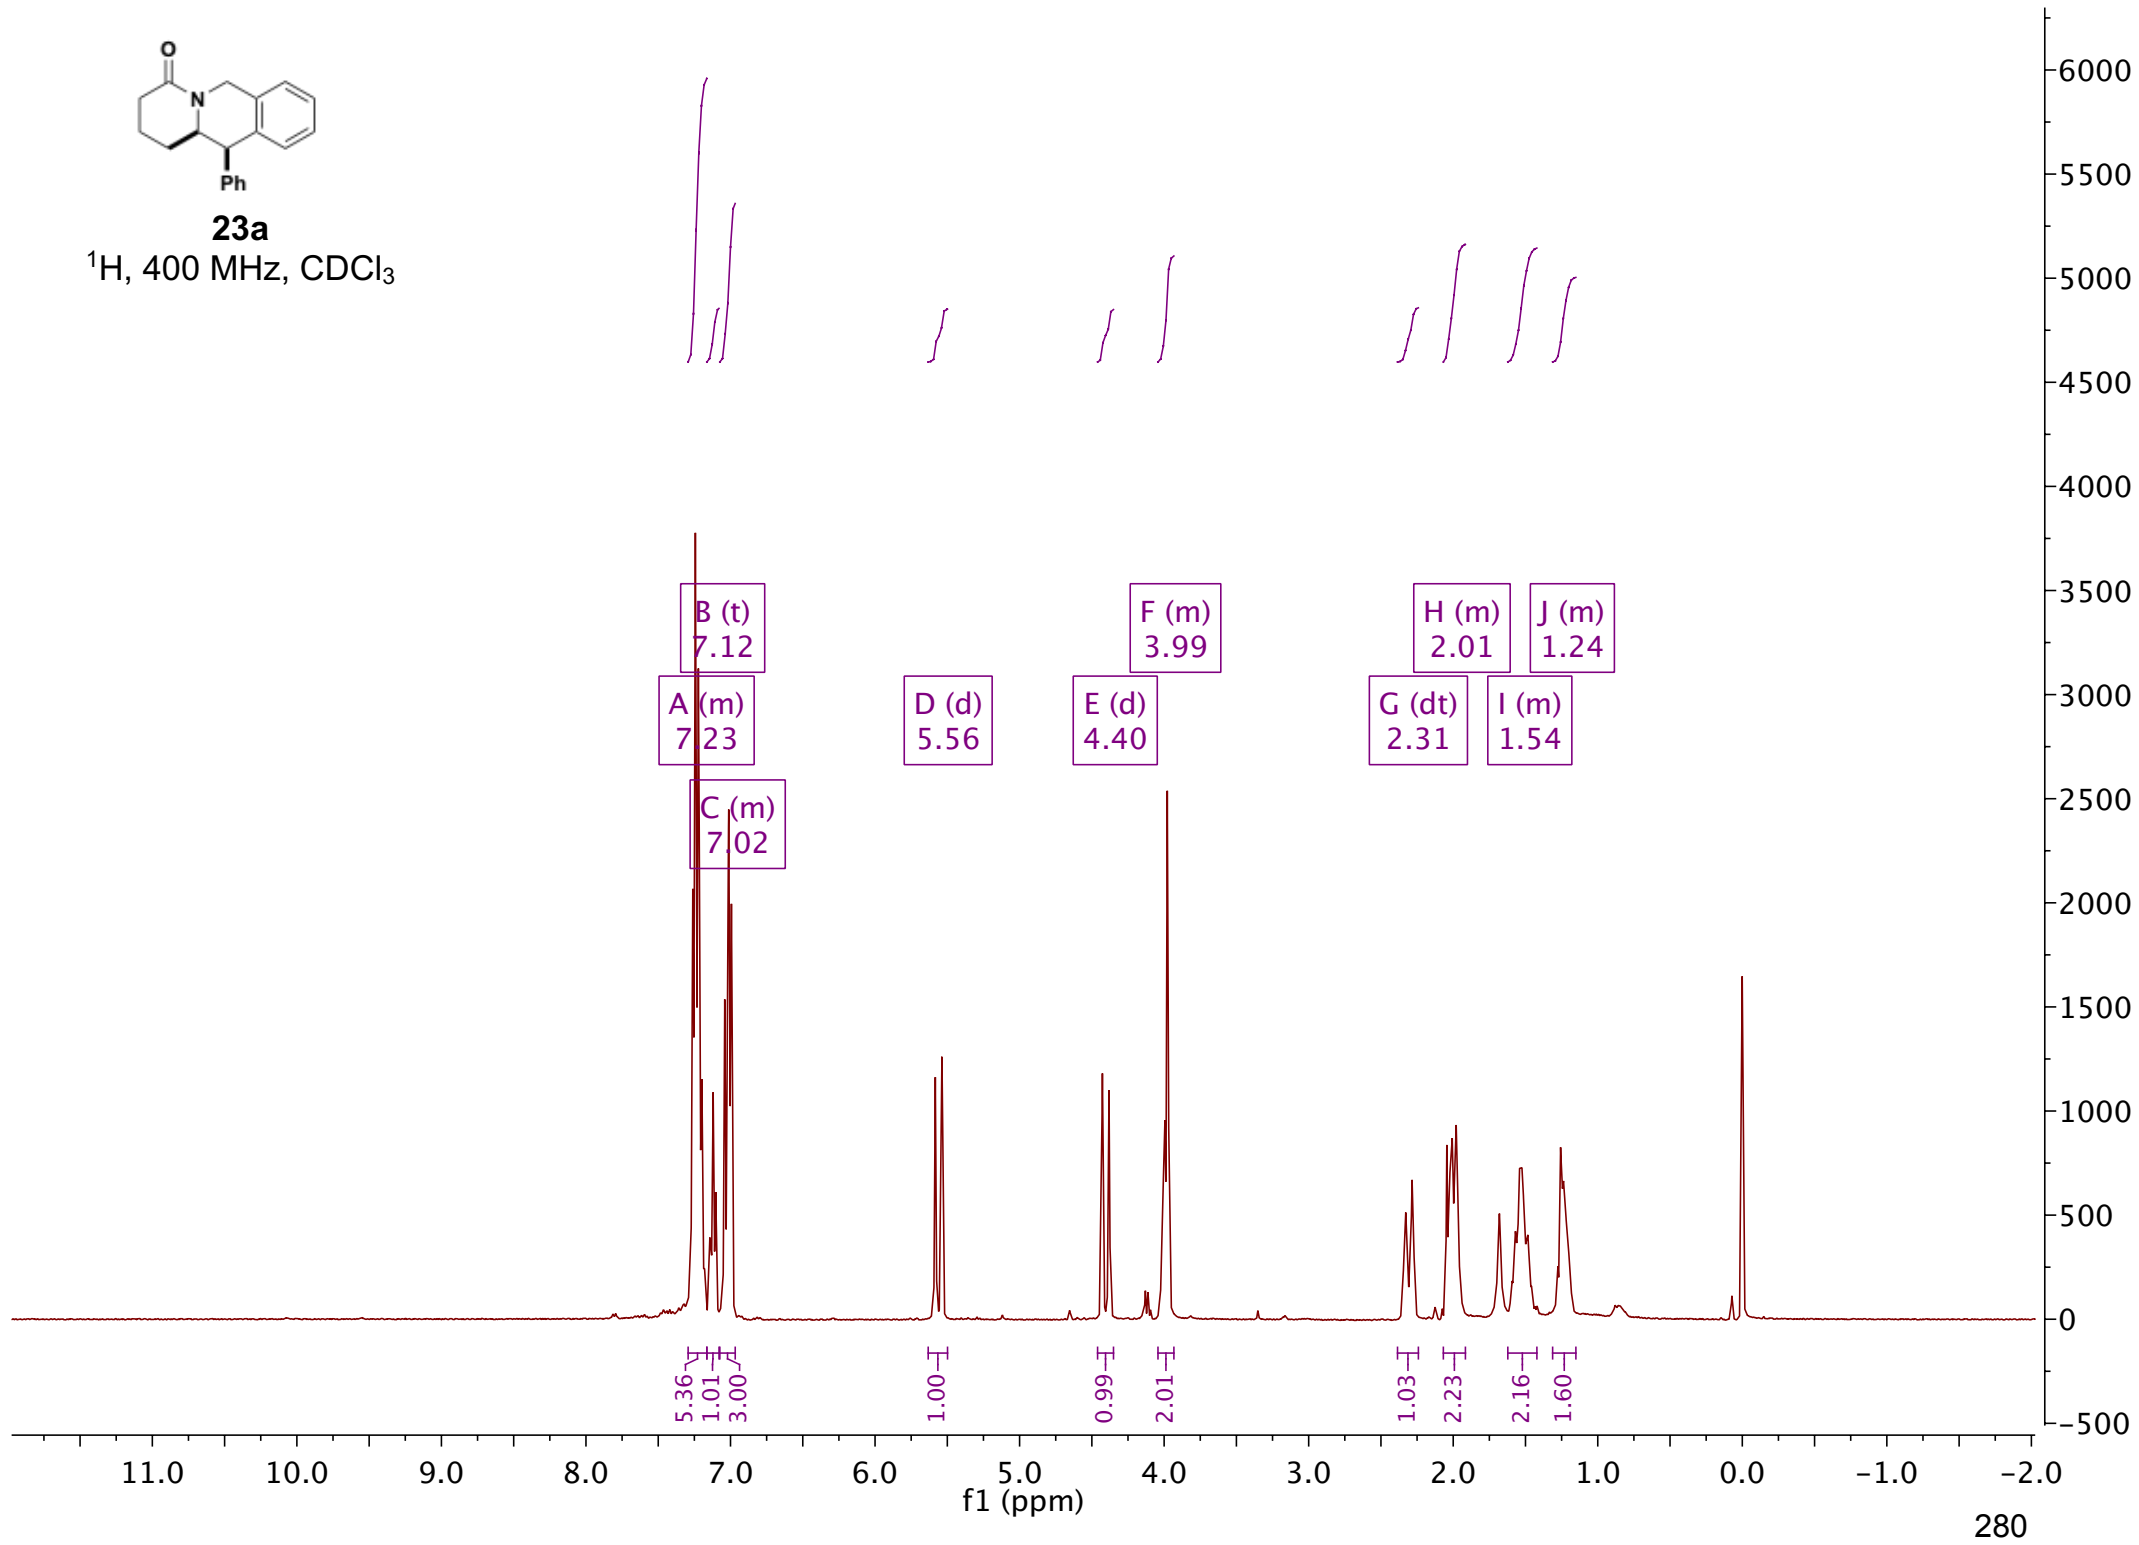

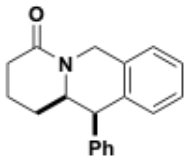

**23a**

$^{13}\text{C}$ , 150 MHz,  $(\text{CD}_3)_2\text{CO}$

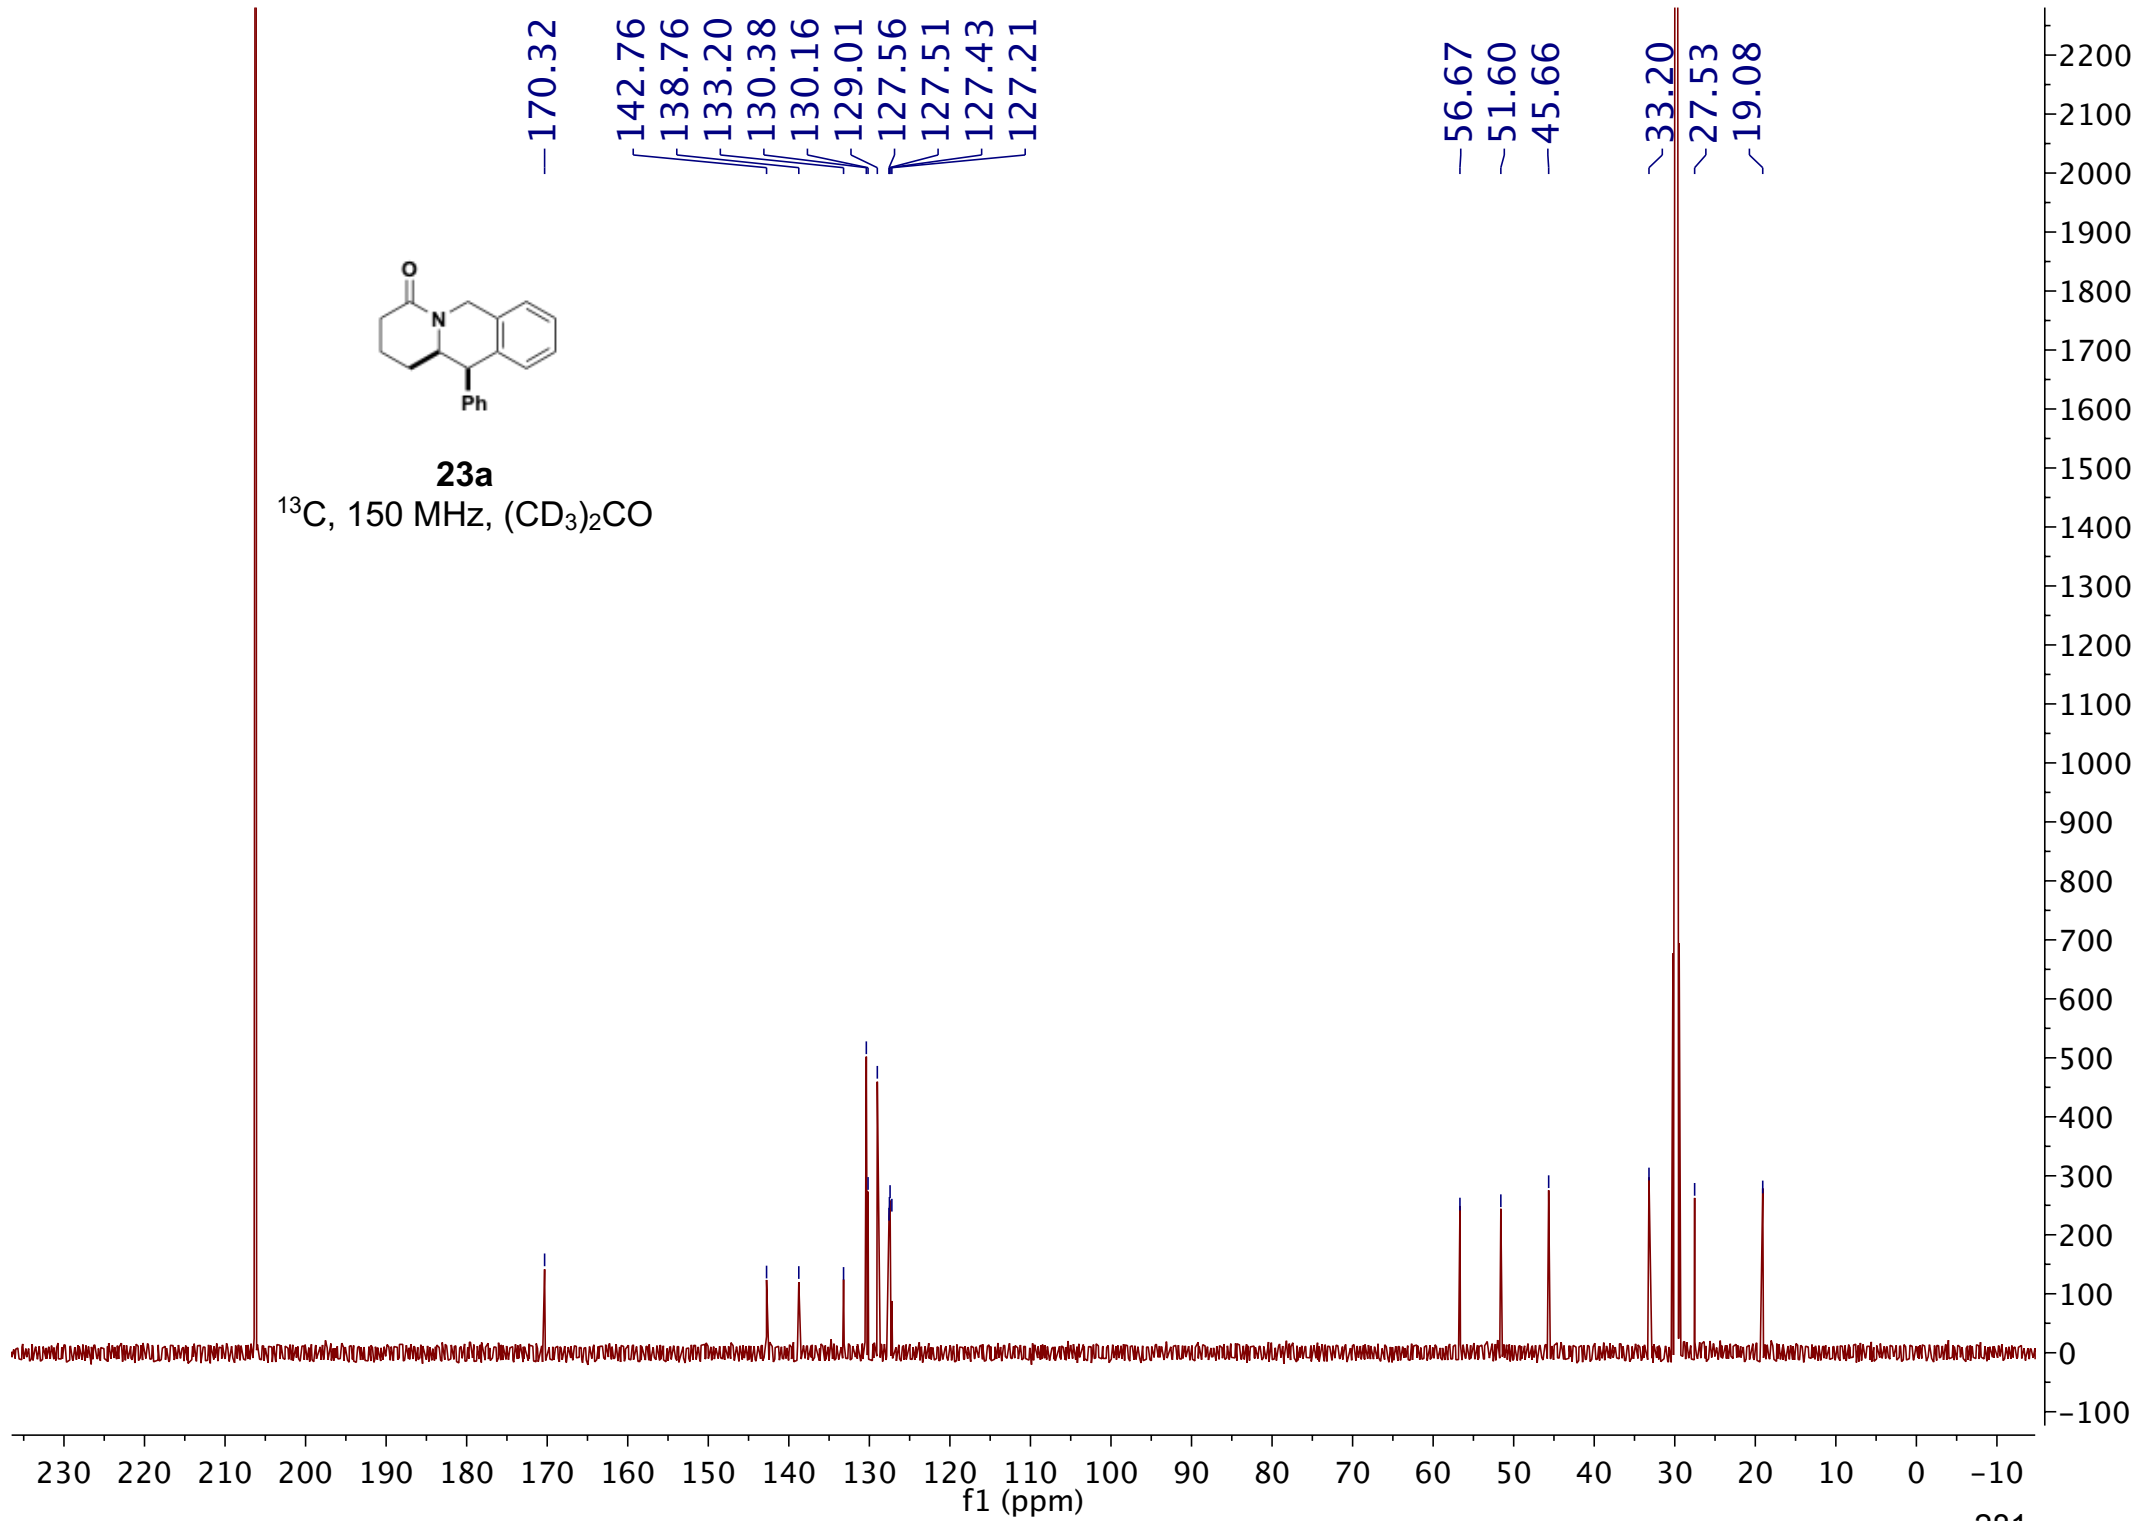

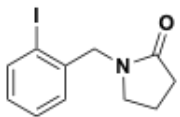

**83**

<sup>1</sup>H, 600 MHz, CDCl<sub>3</sub>

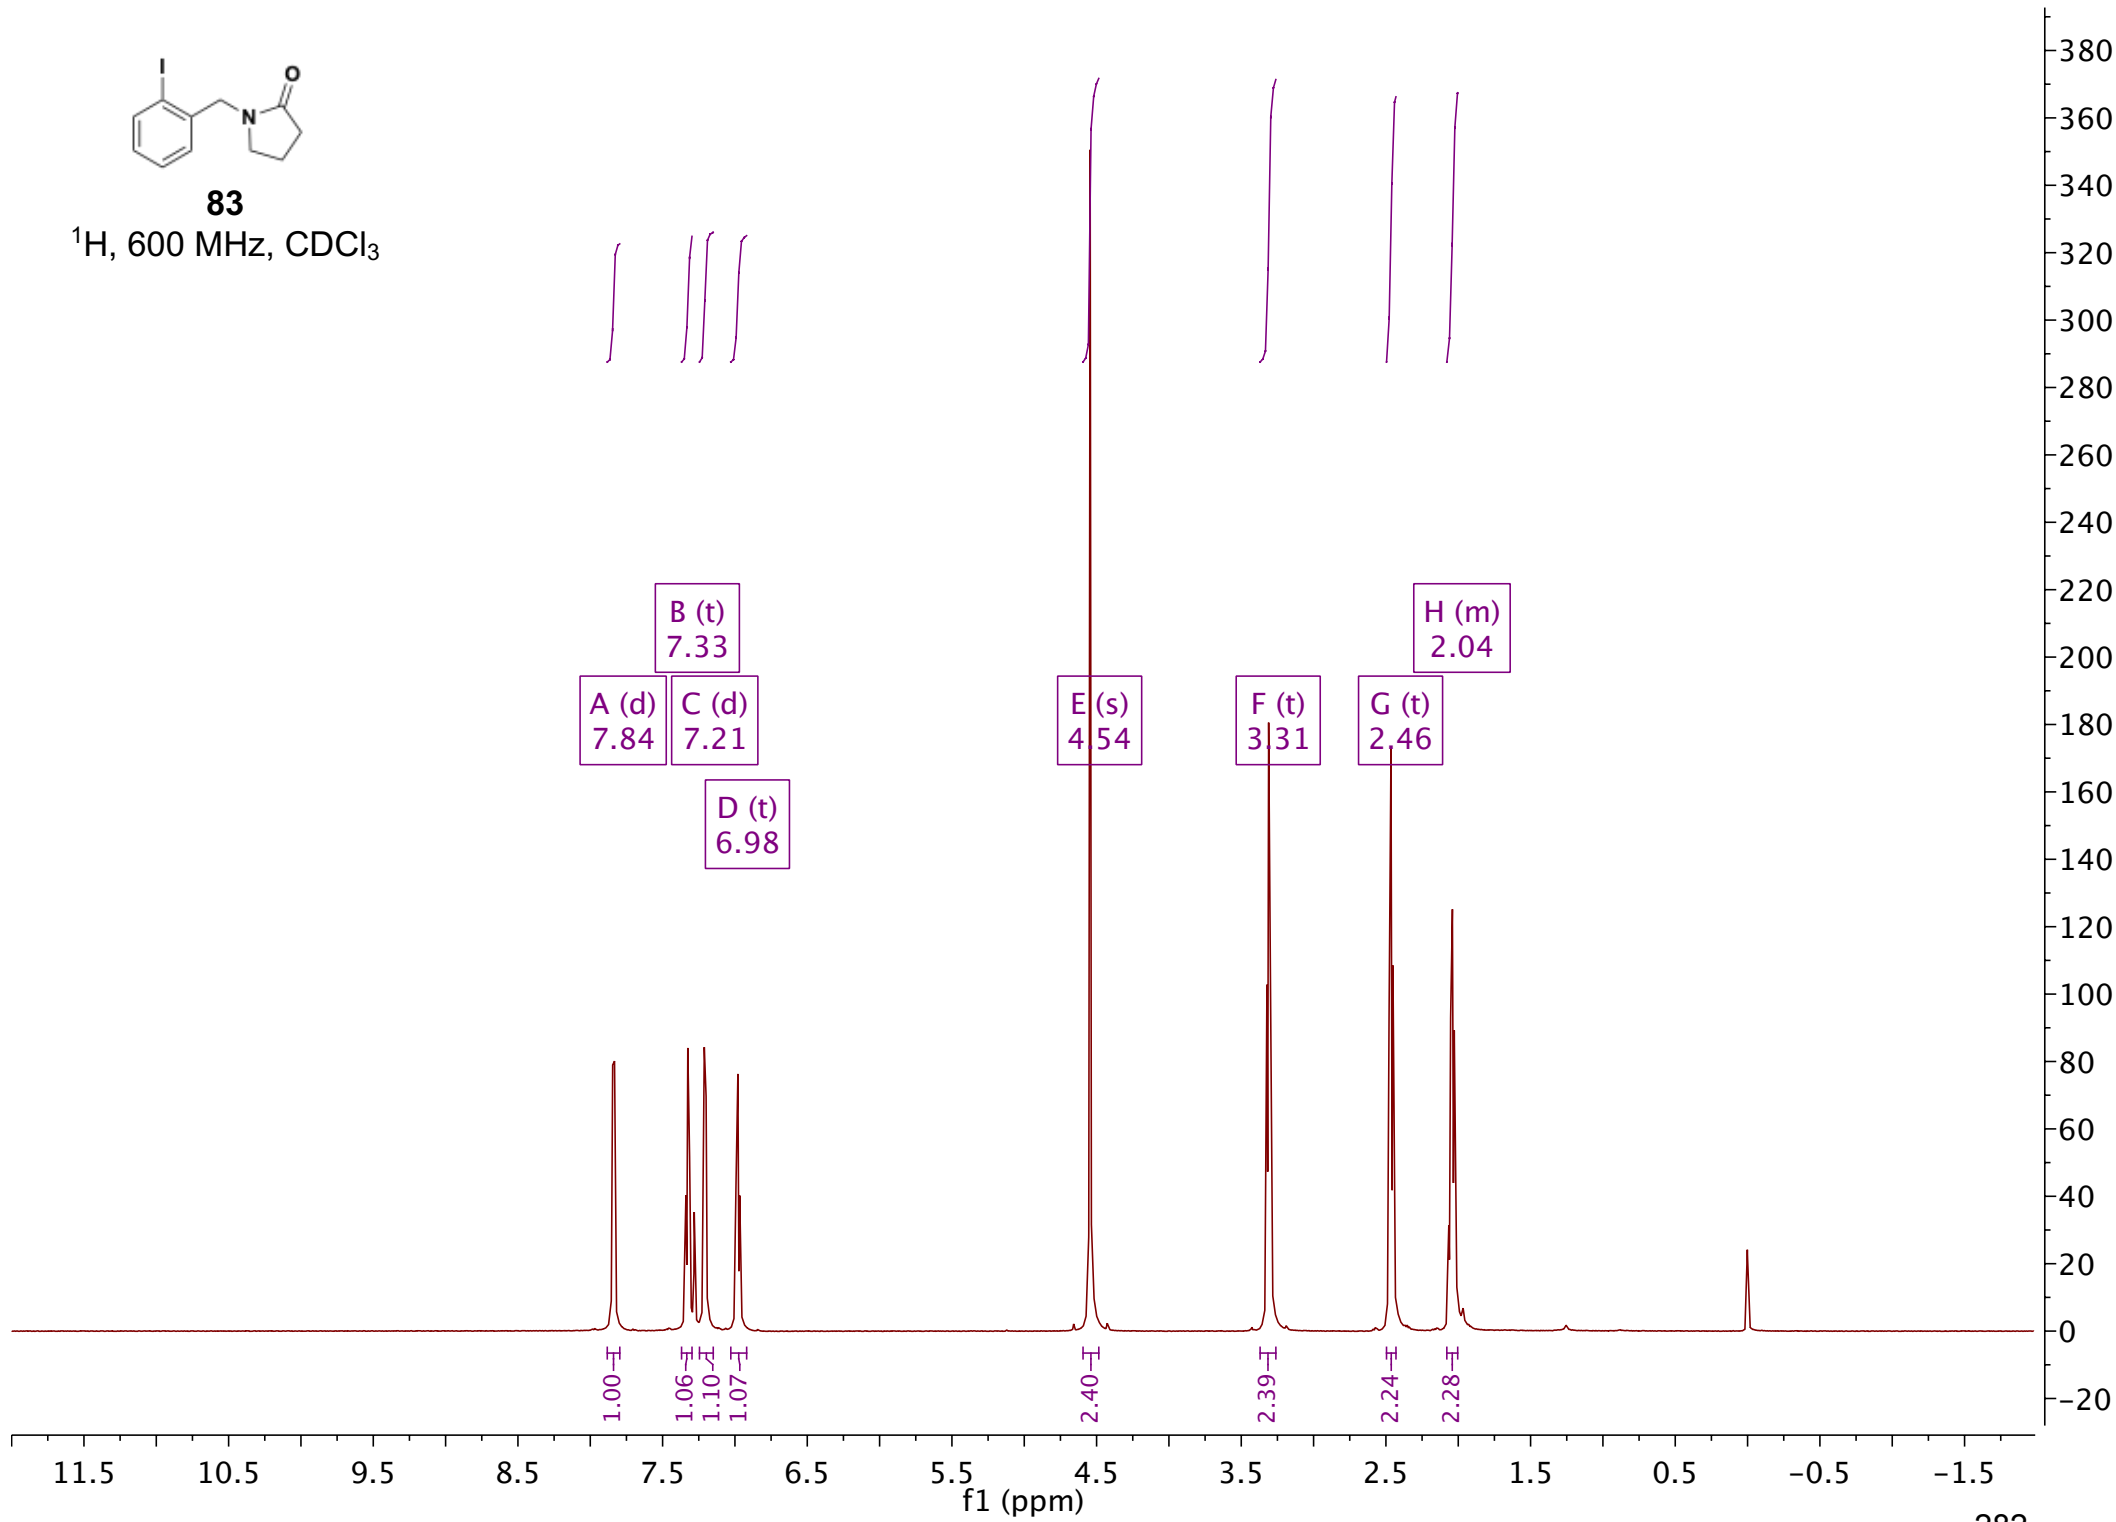



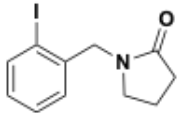

**83**

$^{13}\text{C}$ , 150 MHz,  $\text{CDCl}_3$

—175.27

139.67

138.70

129.35

128.91

128.75

—99.03

~51.23

~47.02

—30.84

—18.01

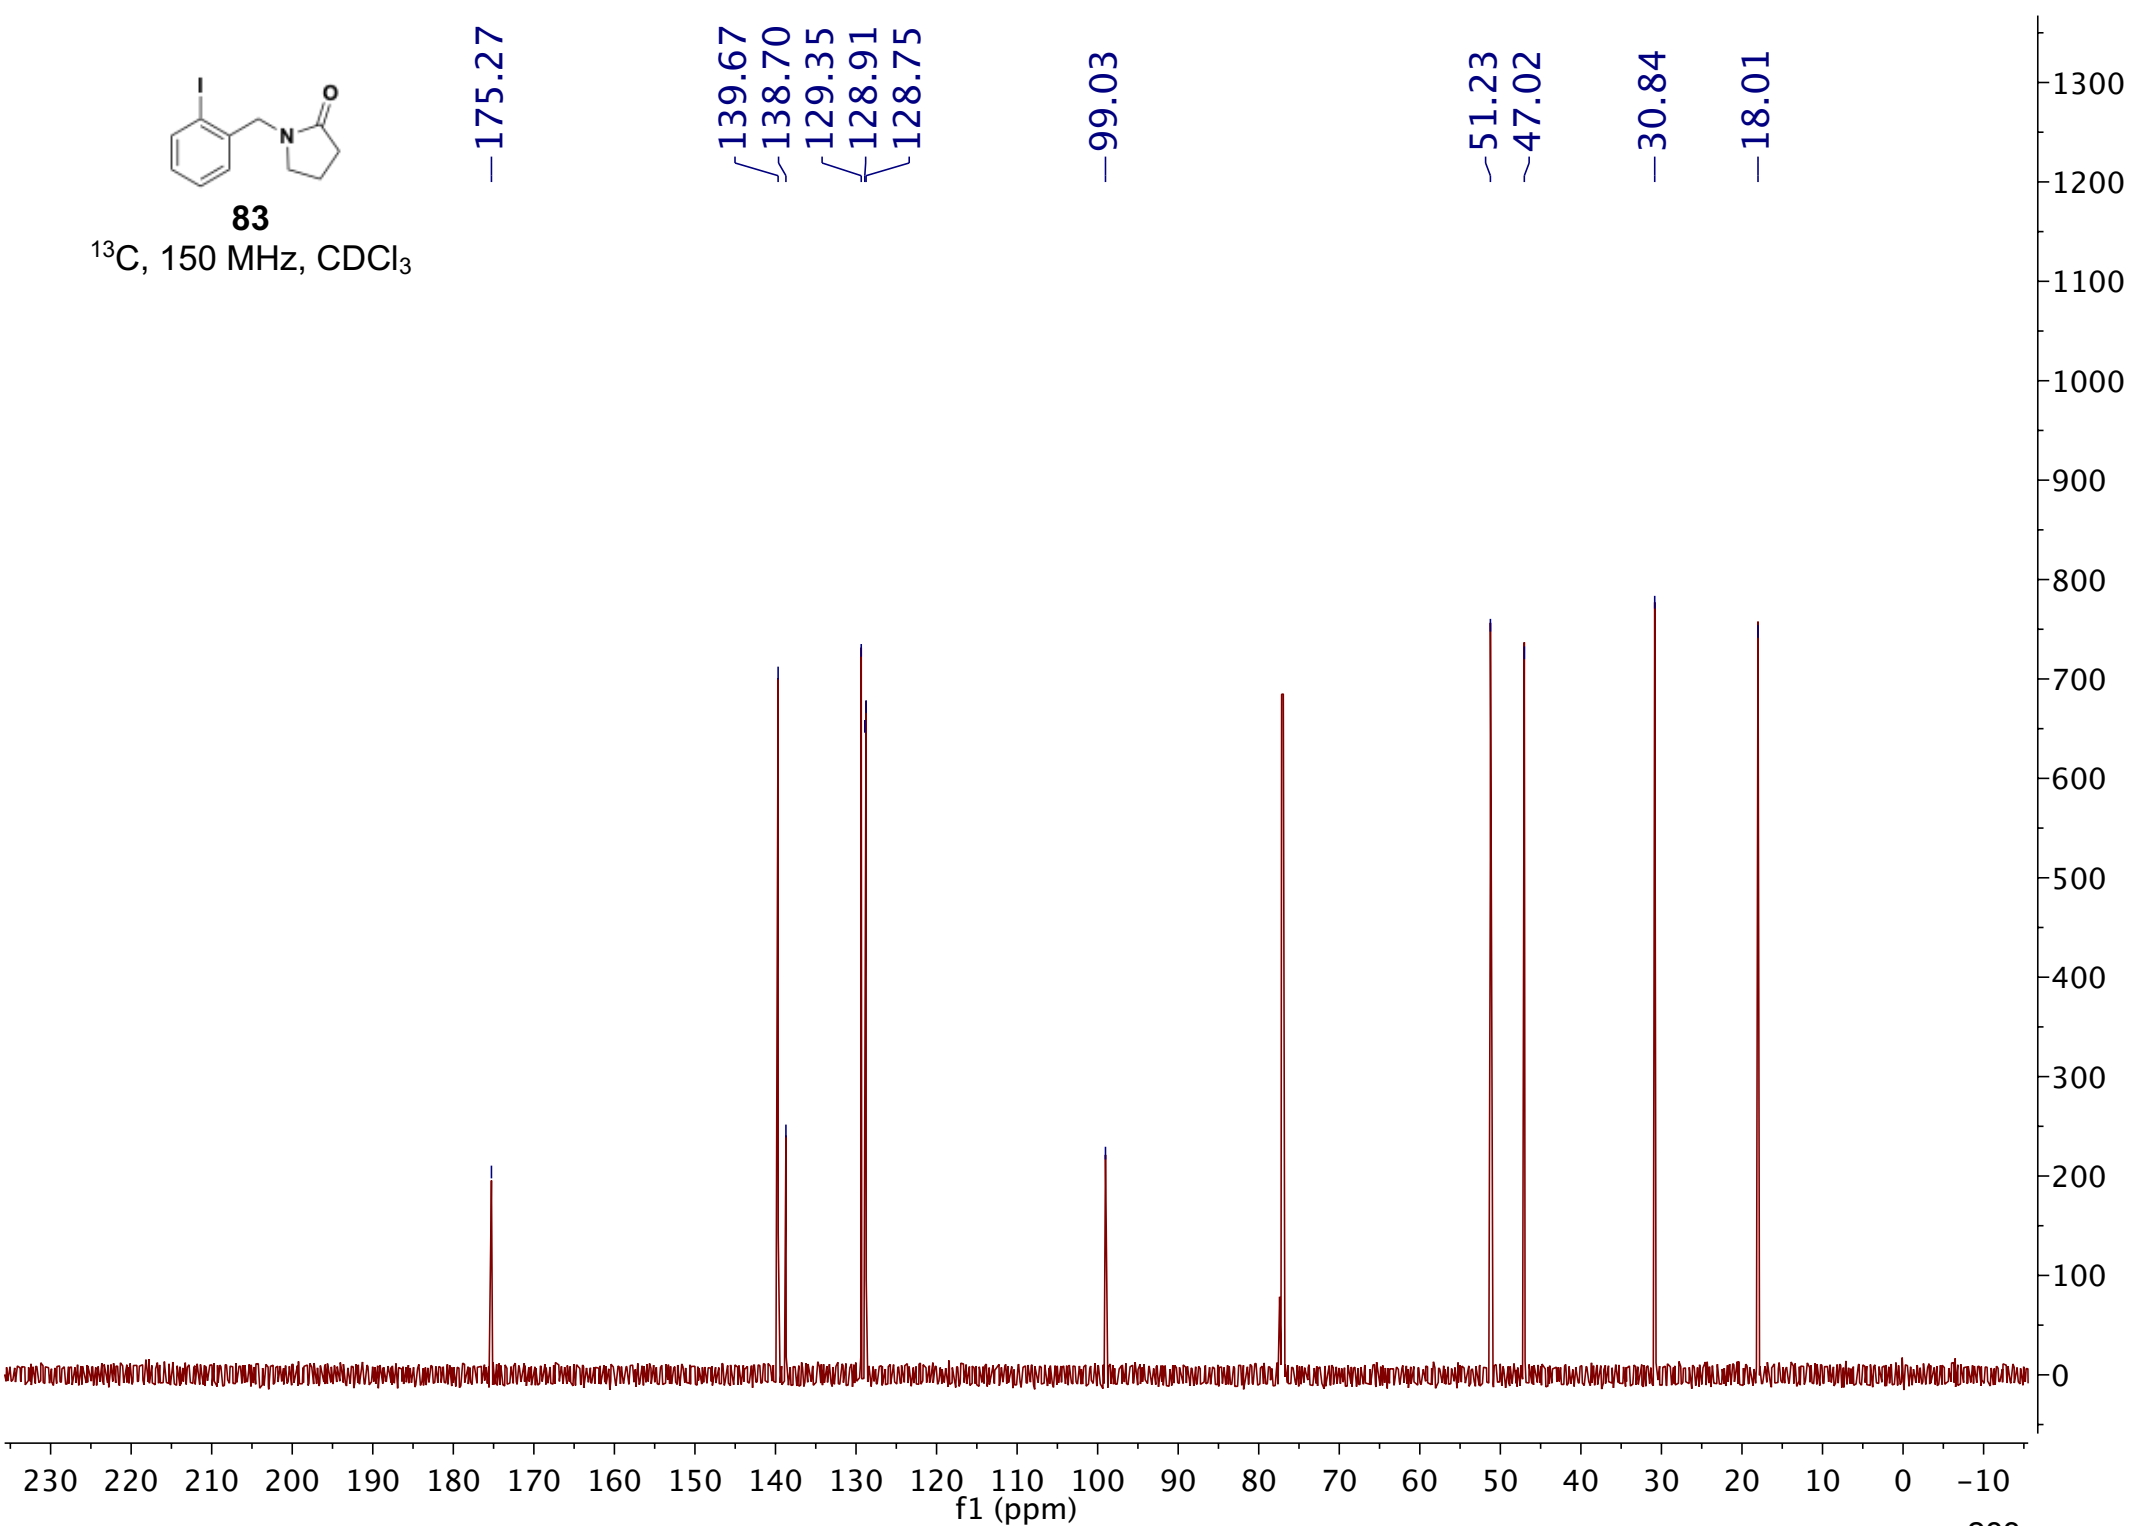

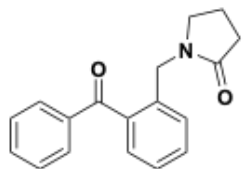

**84**

<sup>1</sup>H, 600 MHz, CDCl<sub>3</sub>

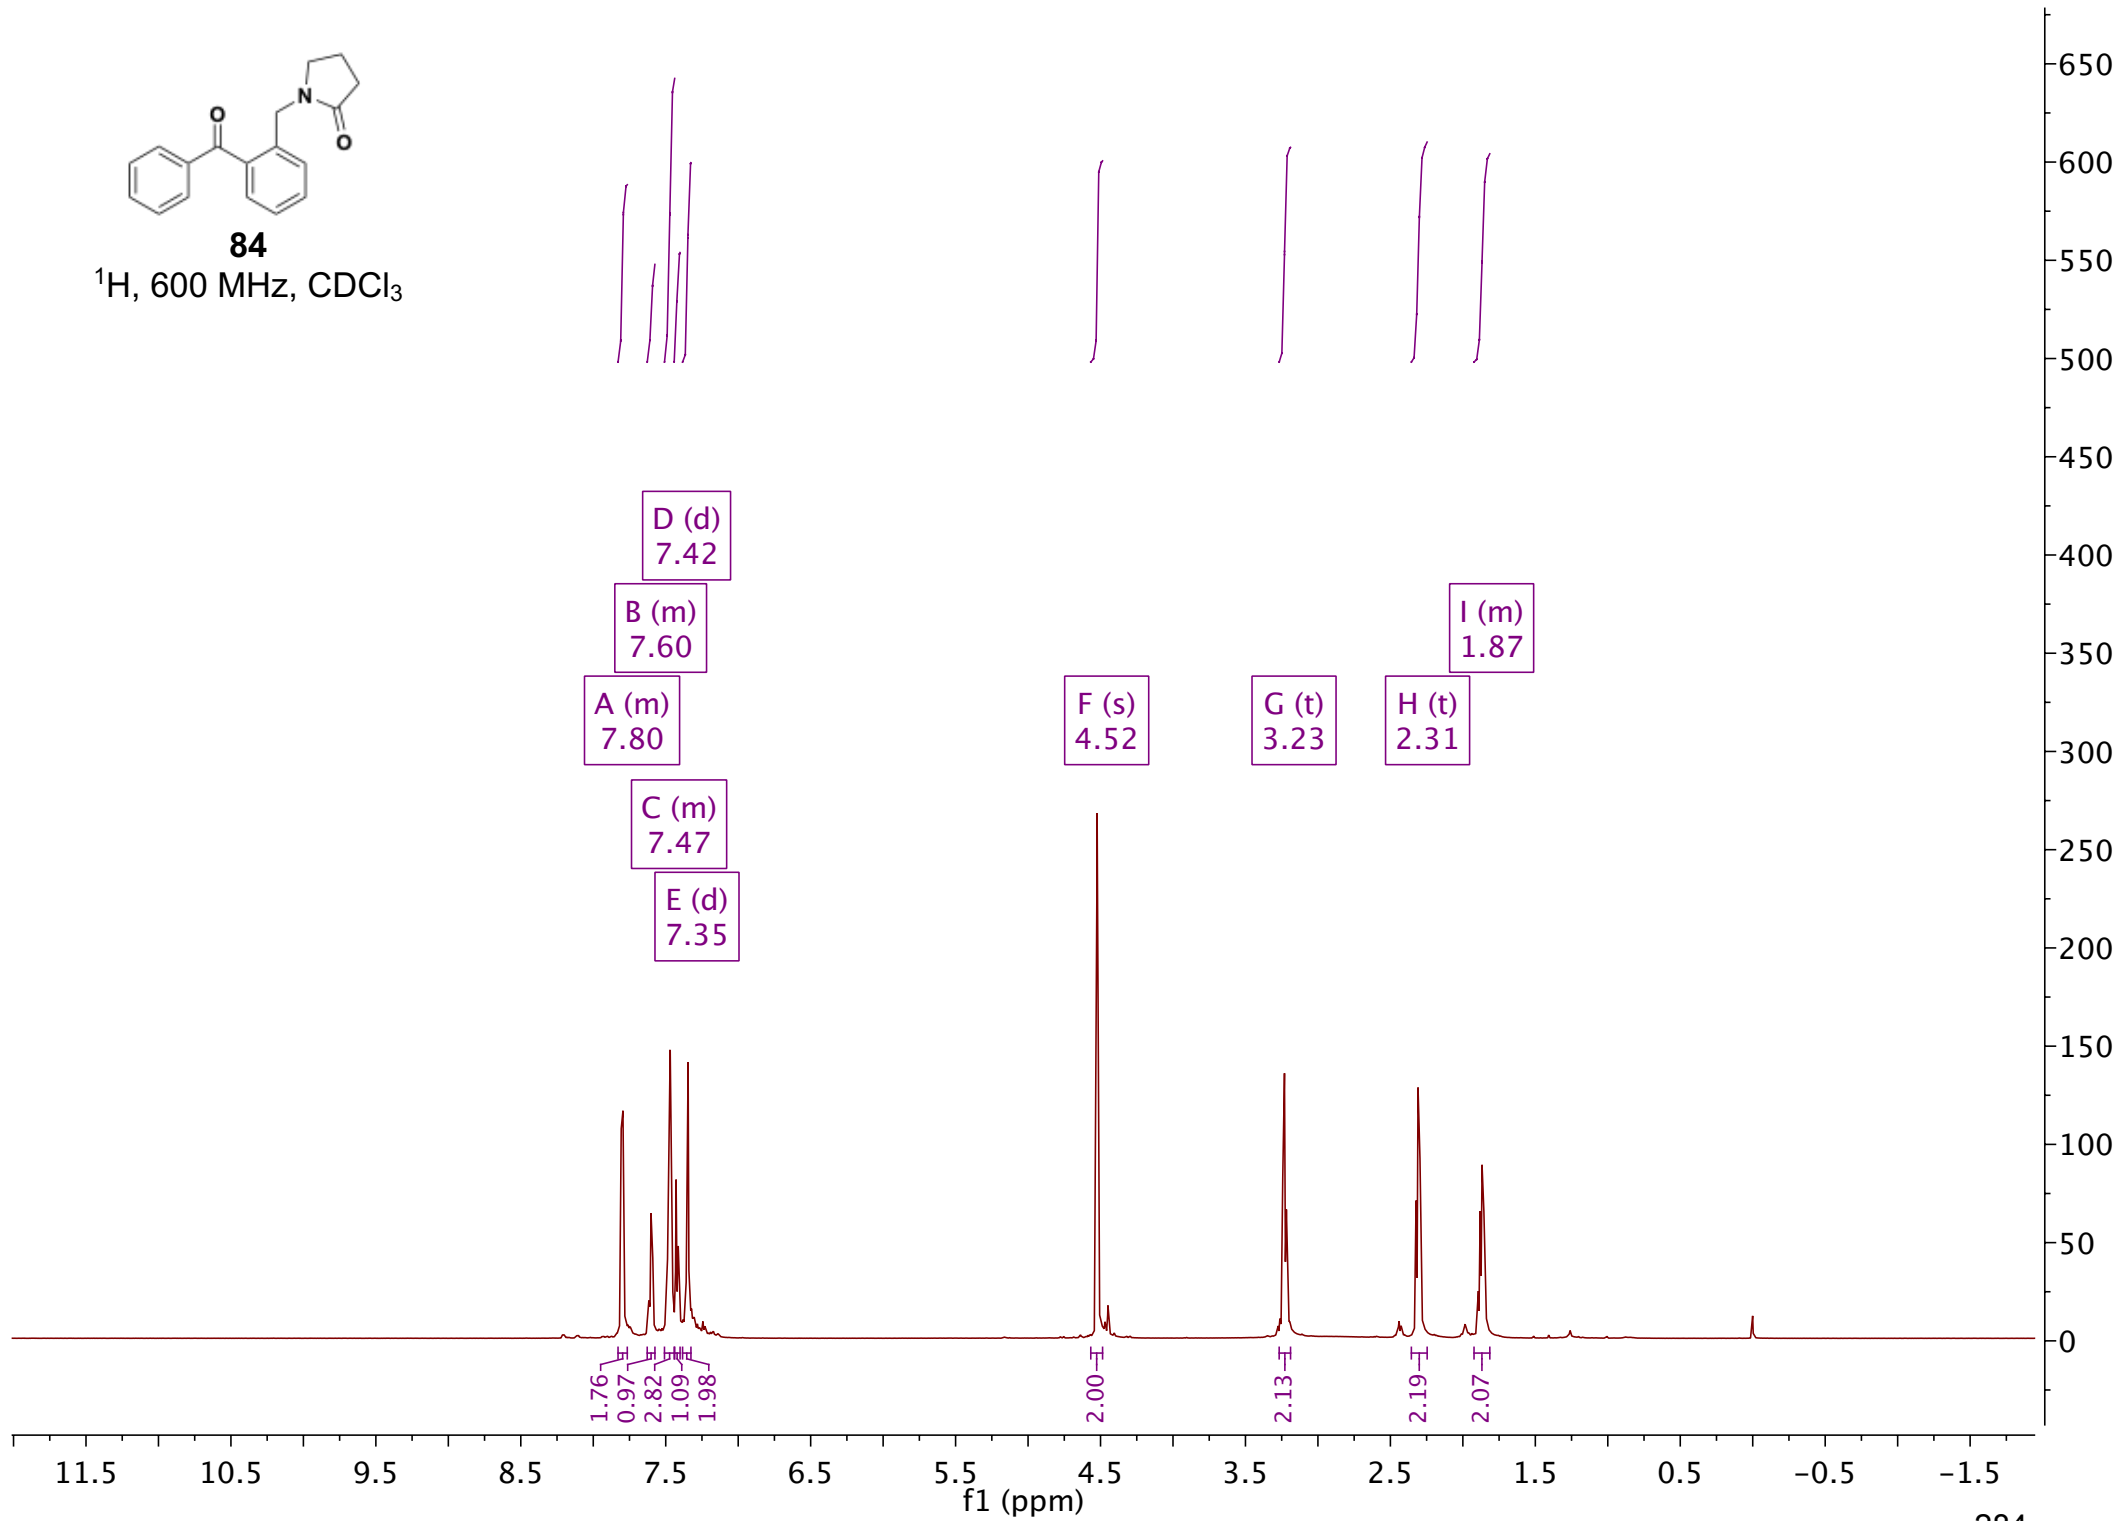

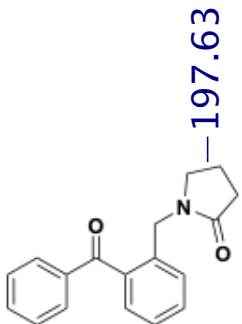

**84**

$^{13}\text{C}$ , 150 MHz,  $\text{CDCl}_3$

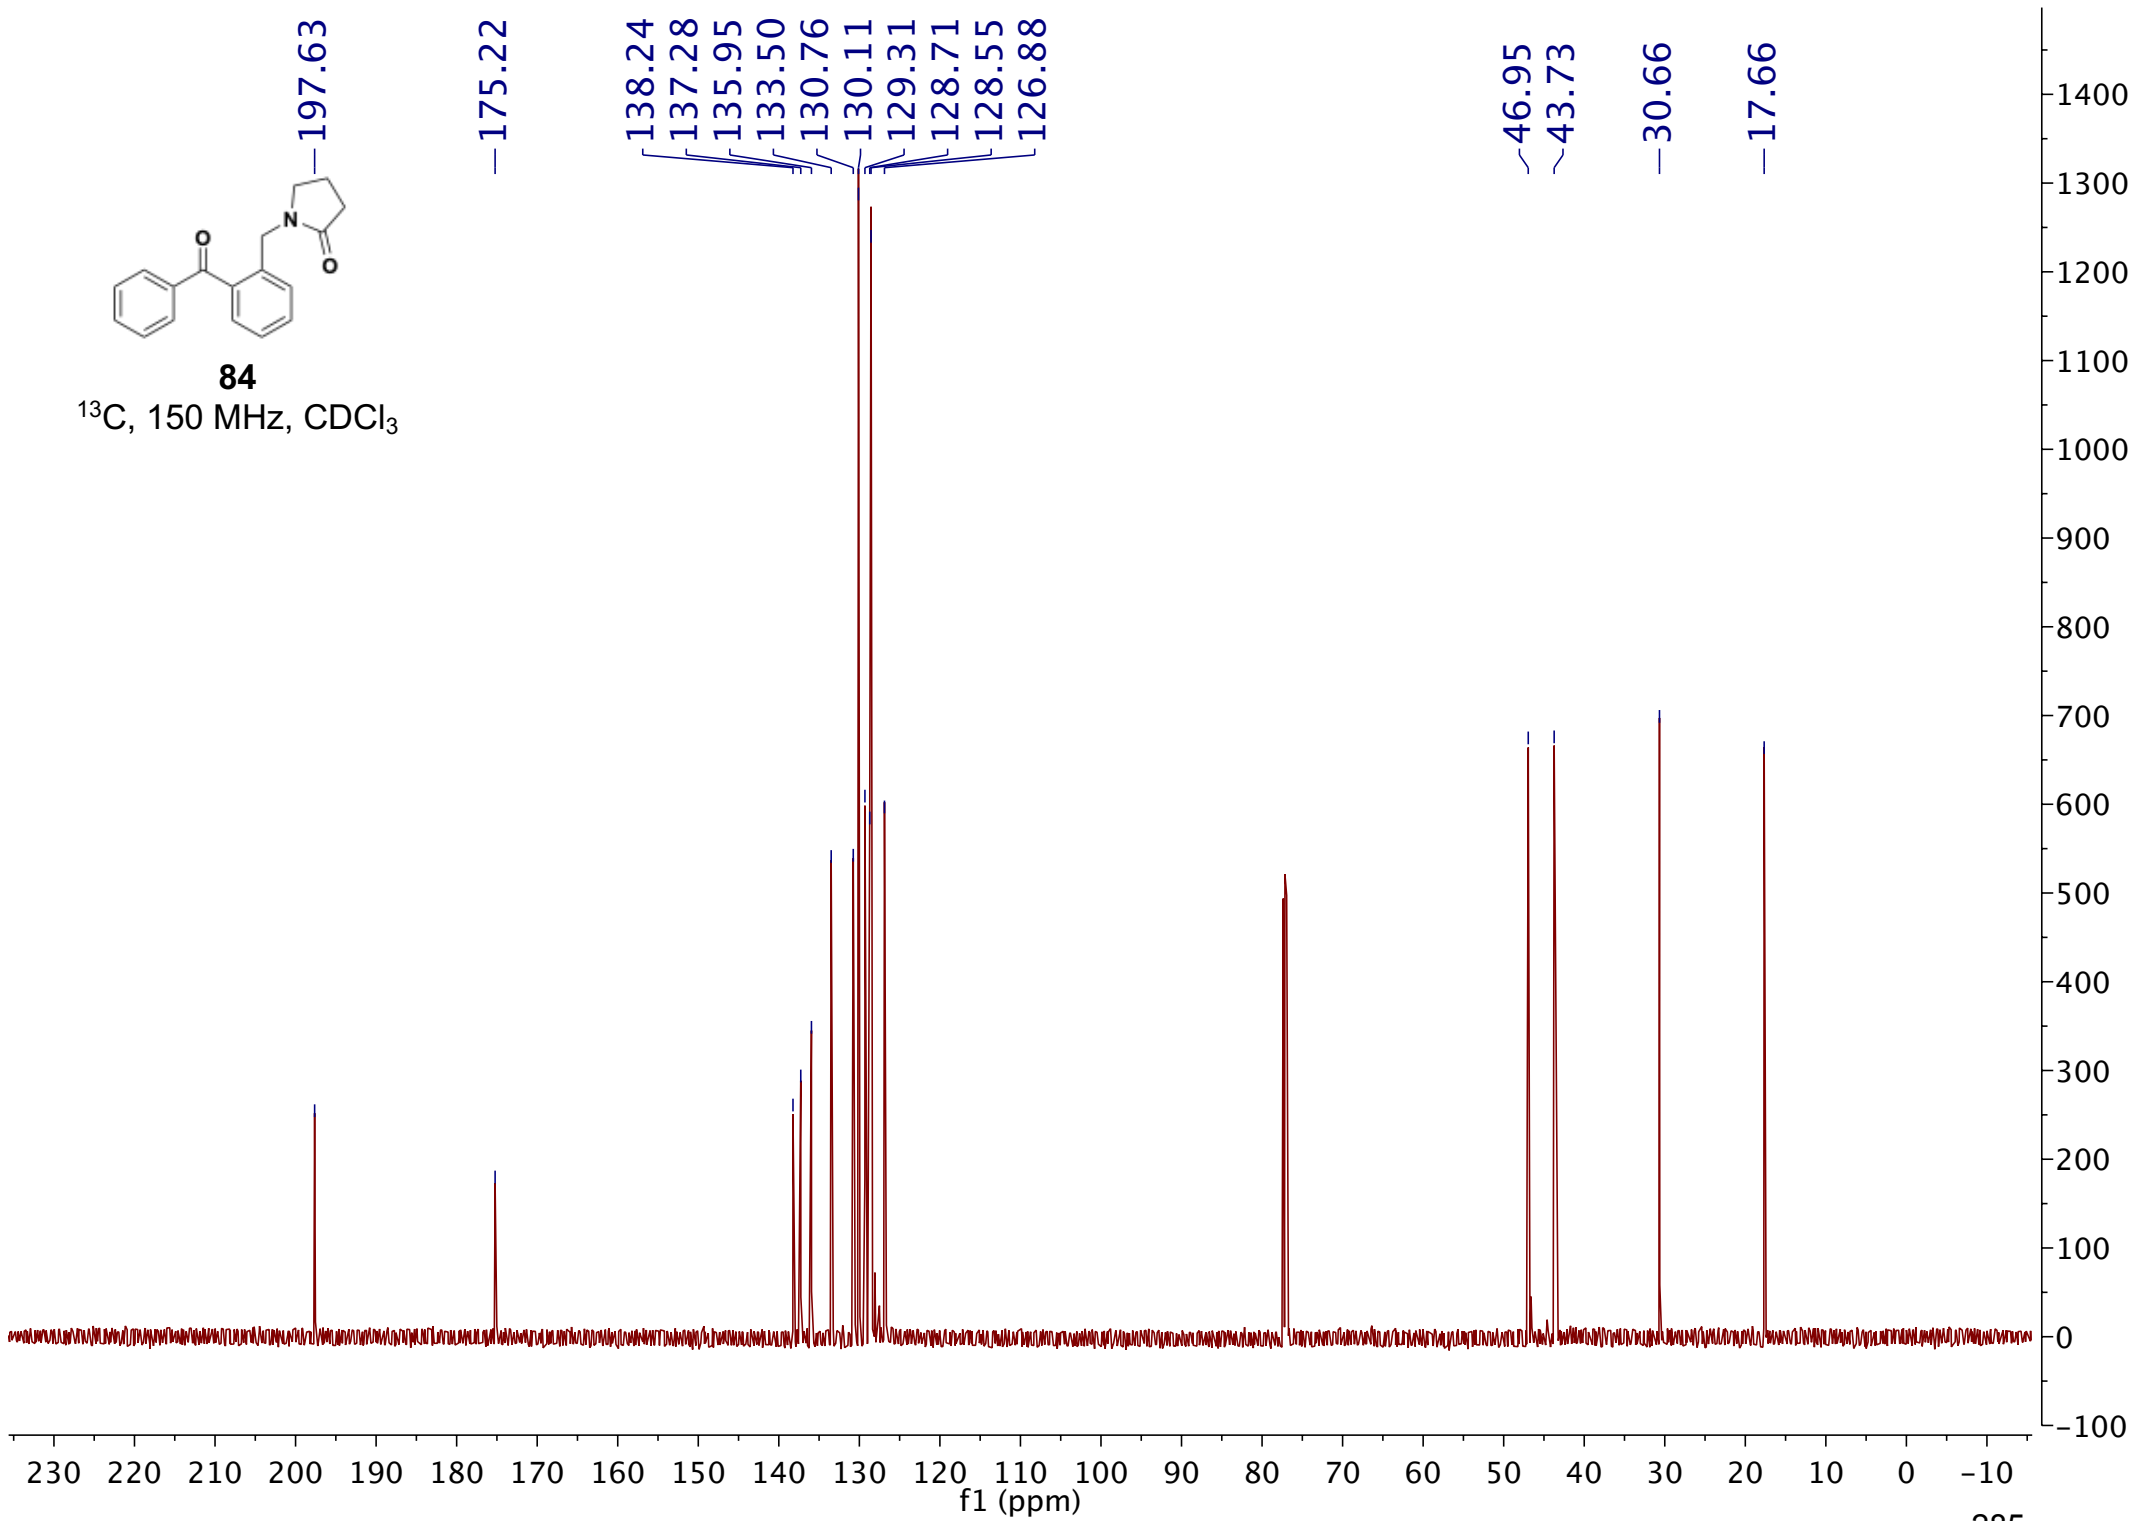

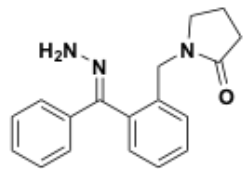

**22b**

$^1\text{H}$ , 600 MHz,  $\text{CDCl}_3$

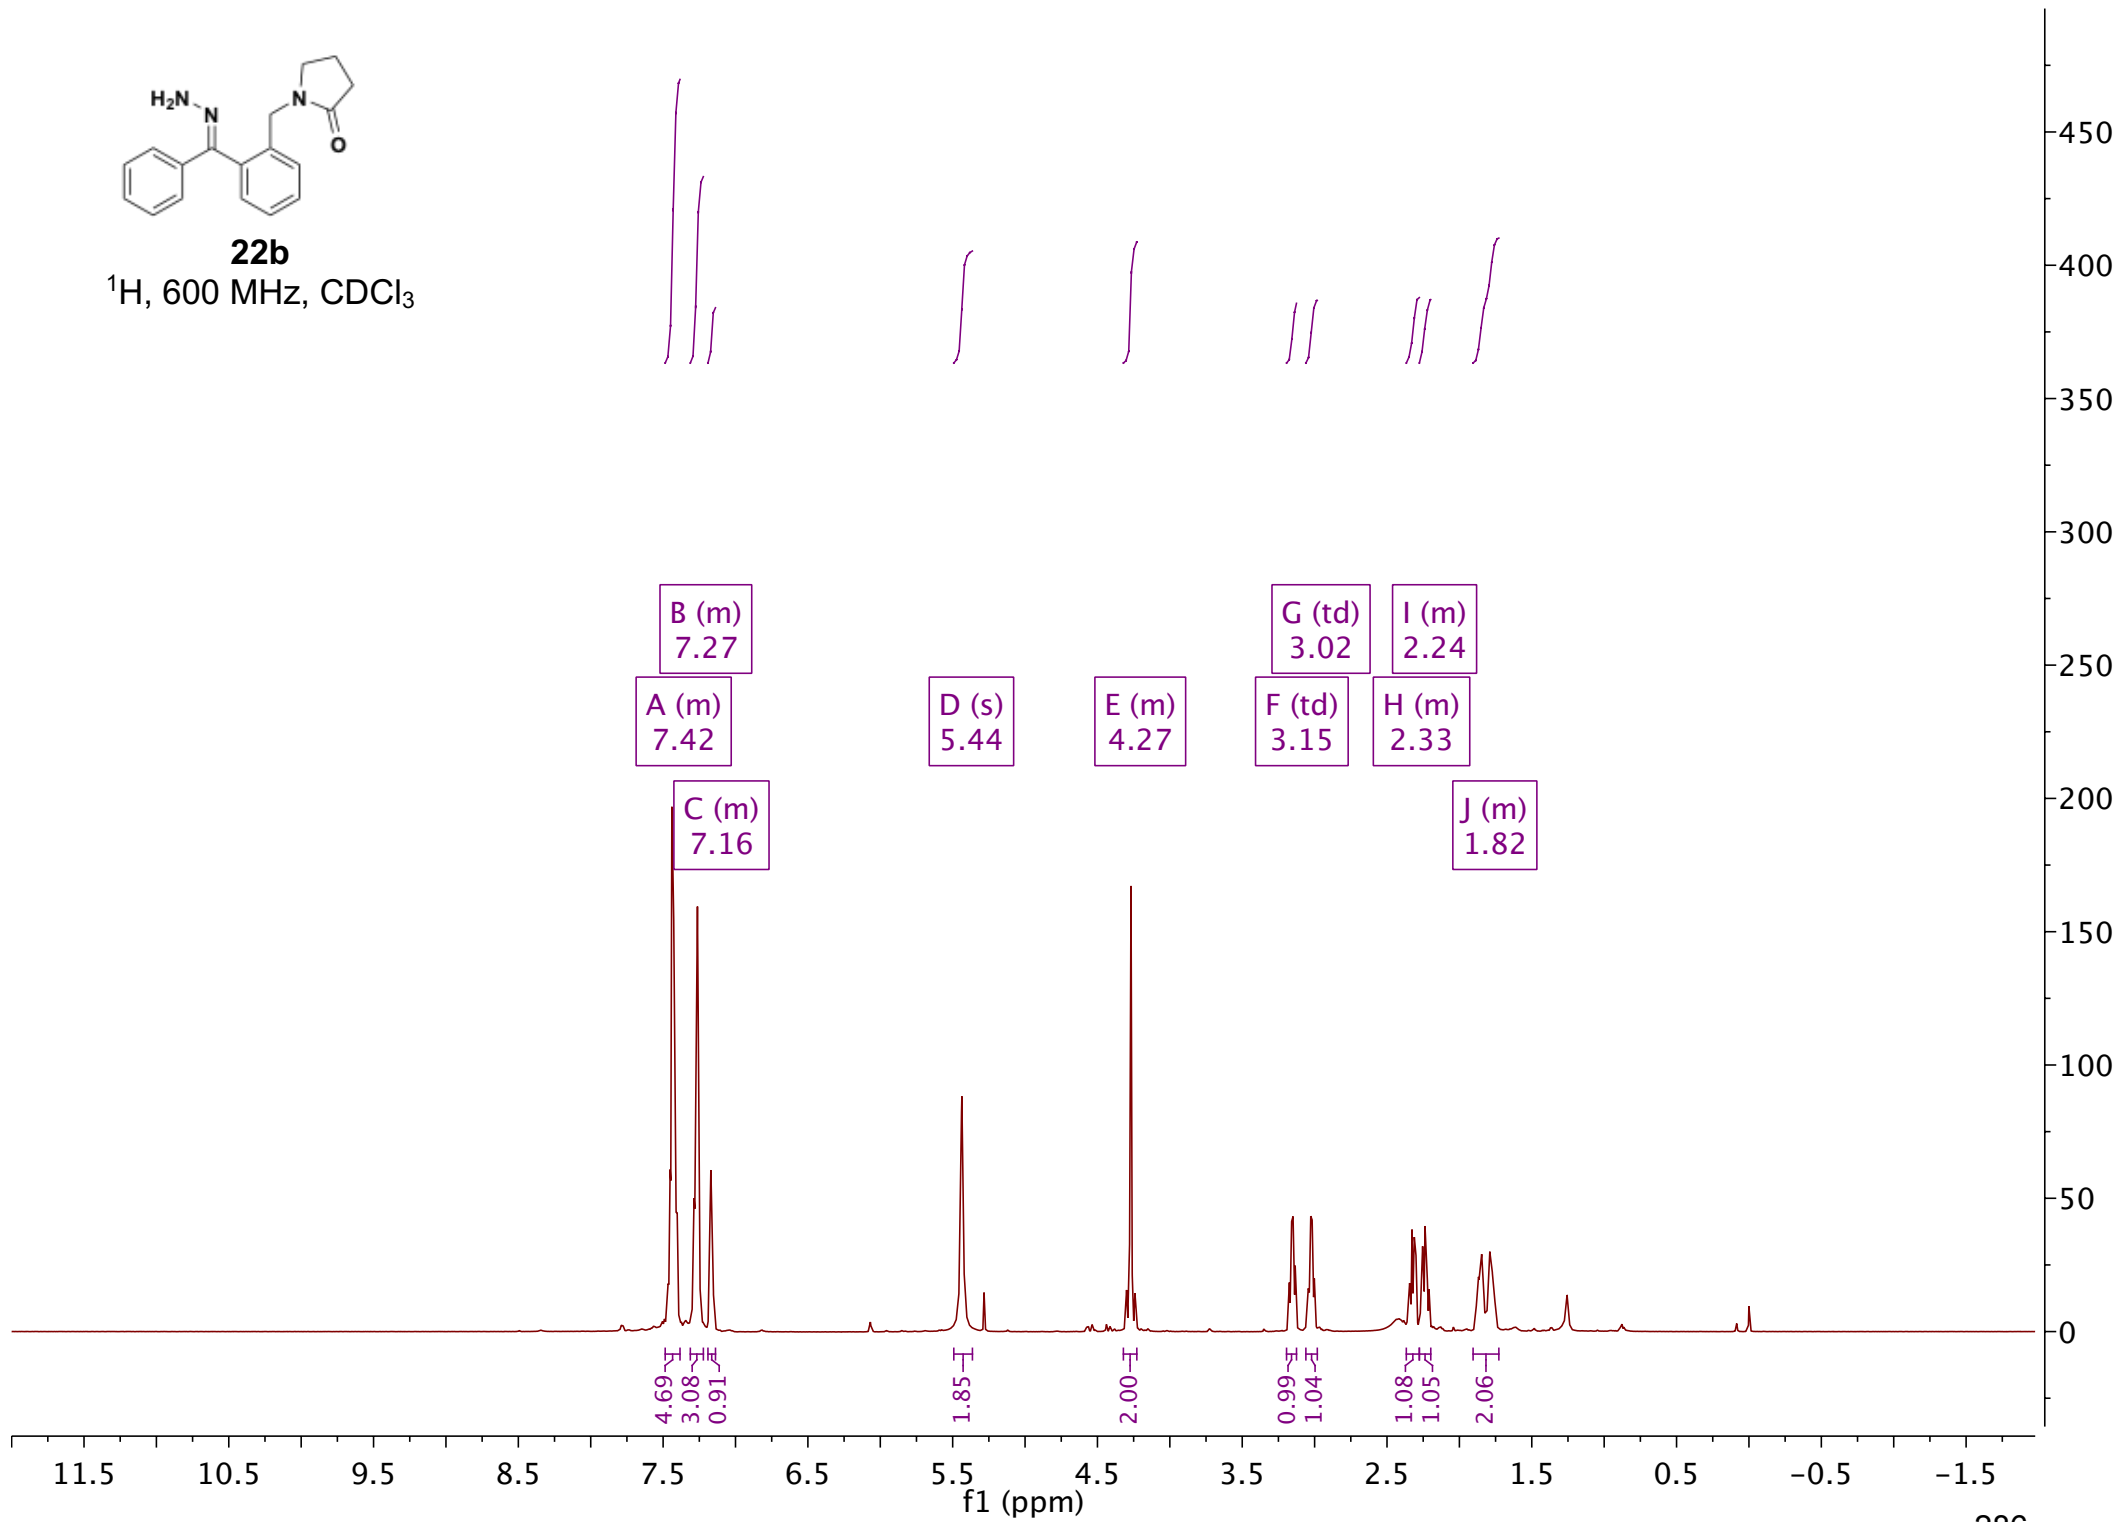

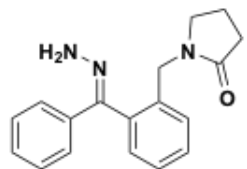

**22b**

$^{13}\text{C}$ , 150 MHz,  $\text{CDCl}_3$

—175.24  
147.27  
137.77  
135.77  
132.13  
129.57  
129.01  
128.85  
128.52  
128.26  
128.17  
125.70  
~47.12  
~43.93  
—30.65  
—17.59

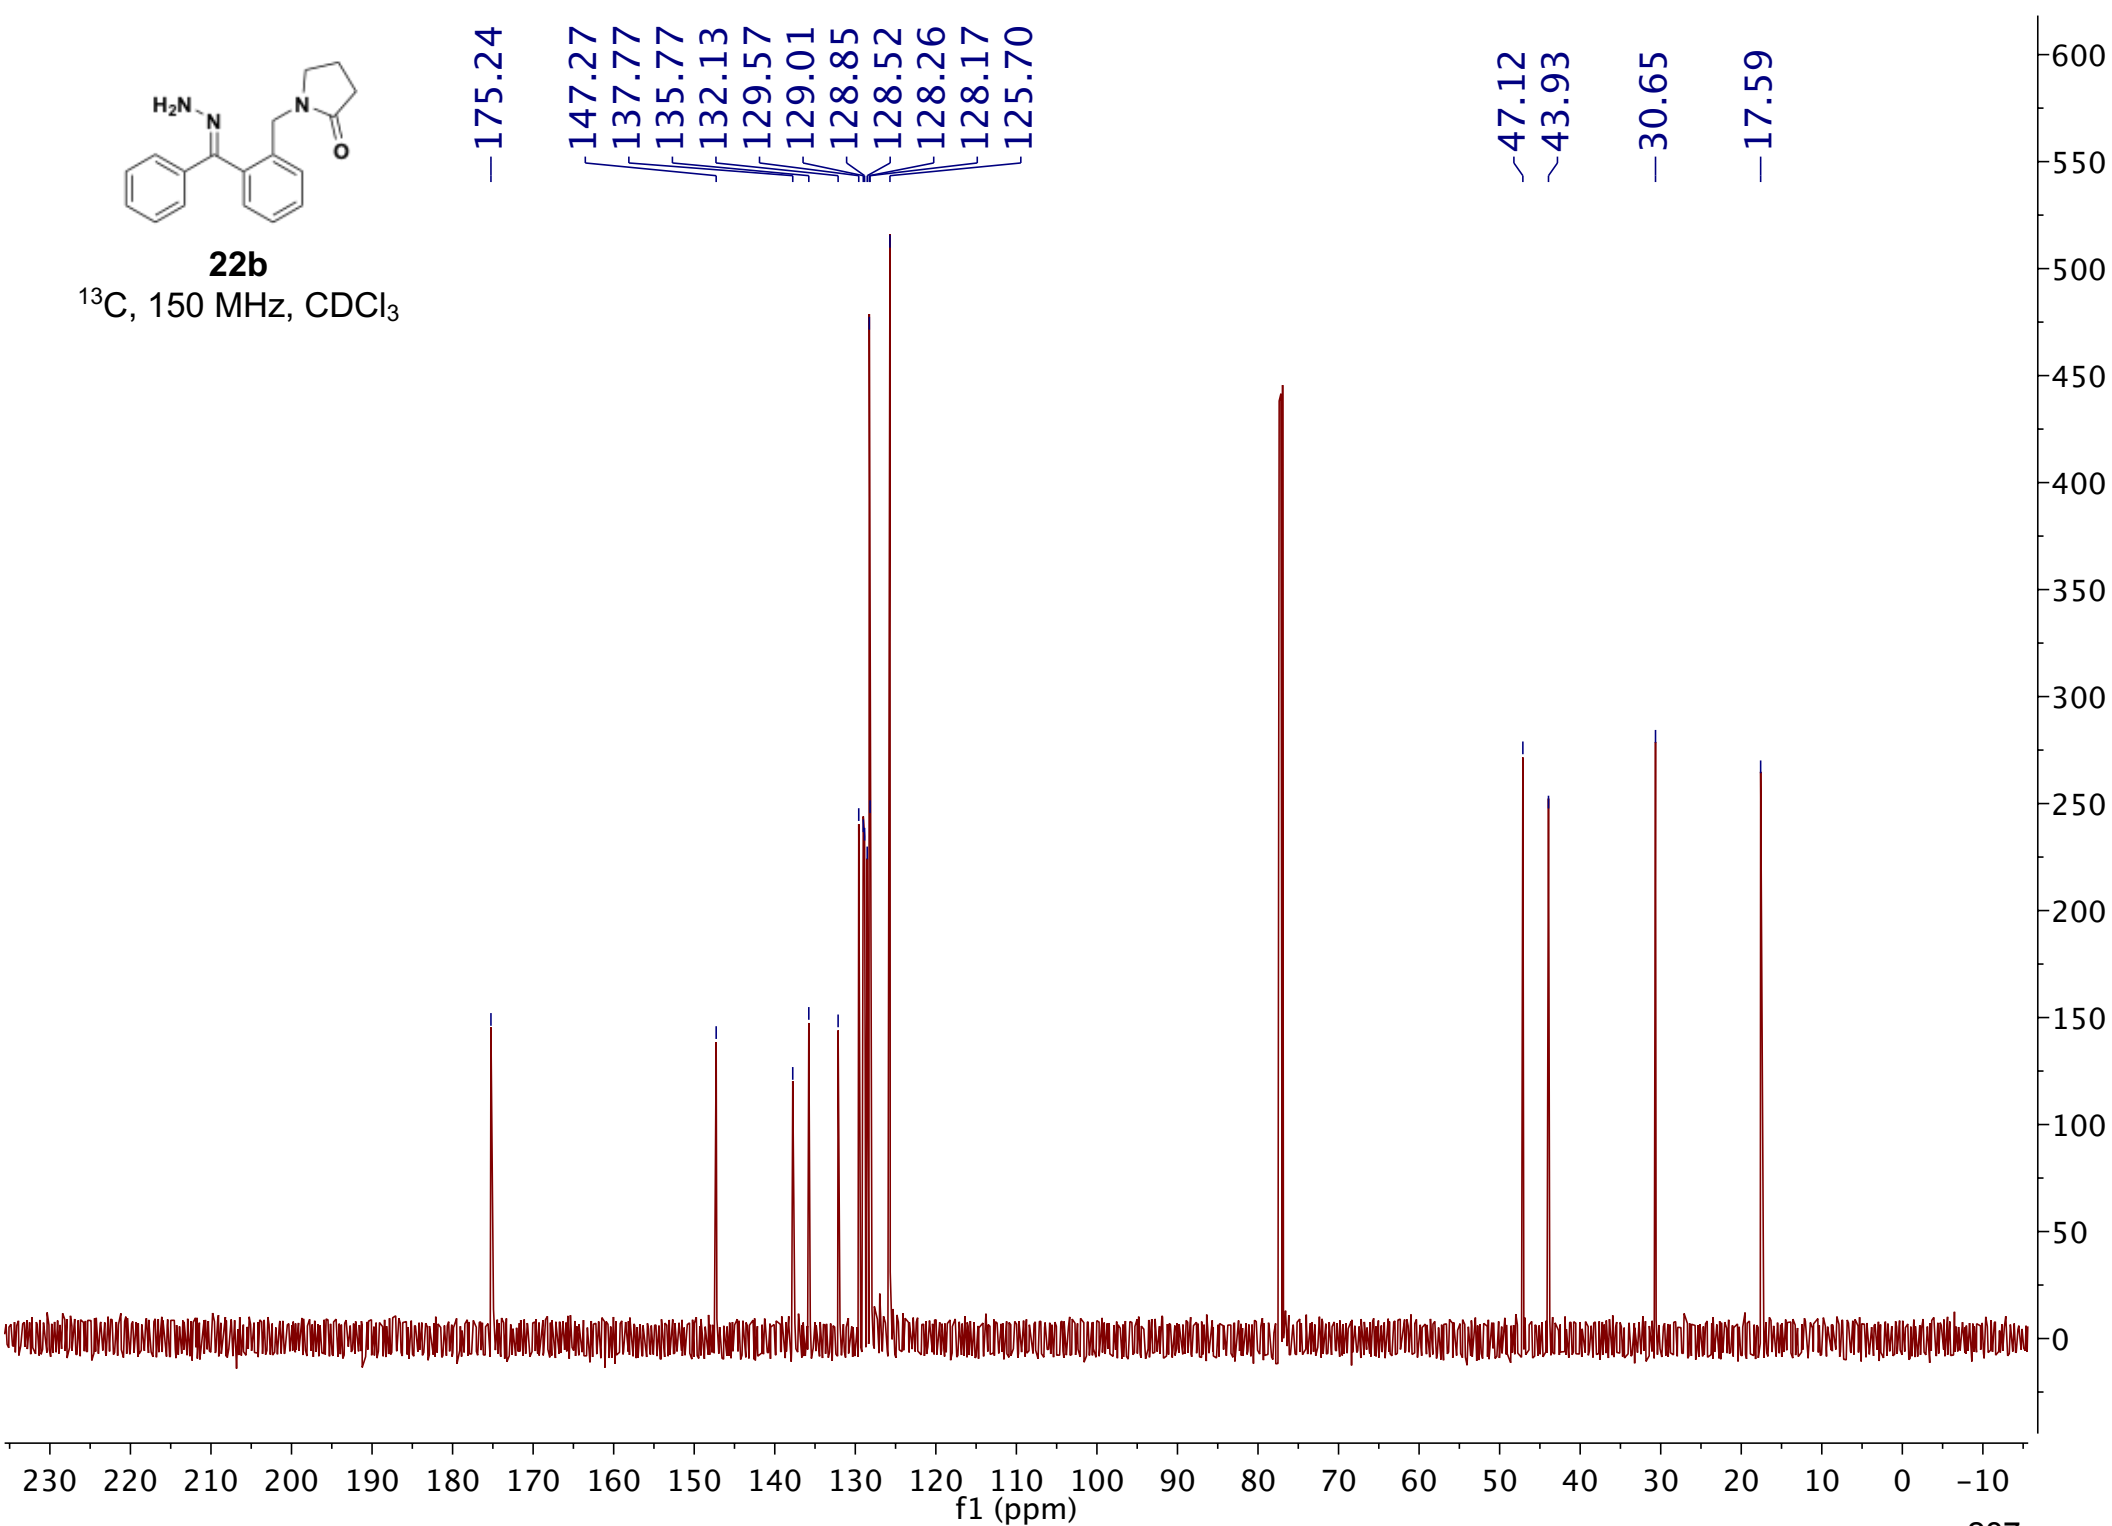

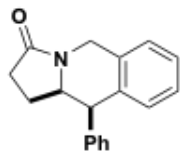

**23b**

$^1\text{H}$ , 600 MHz,  $\text{CDCl}_3$

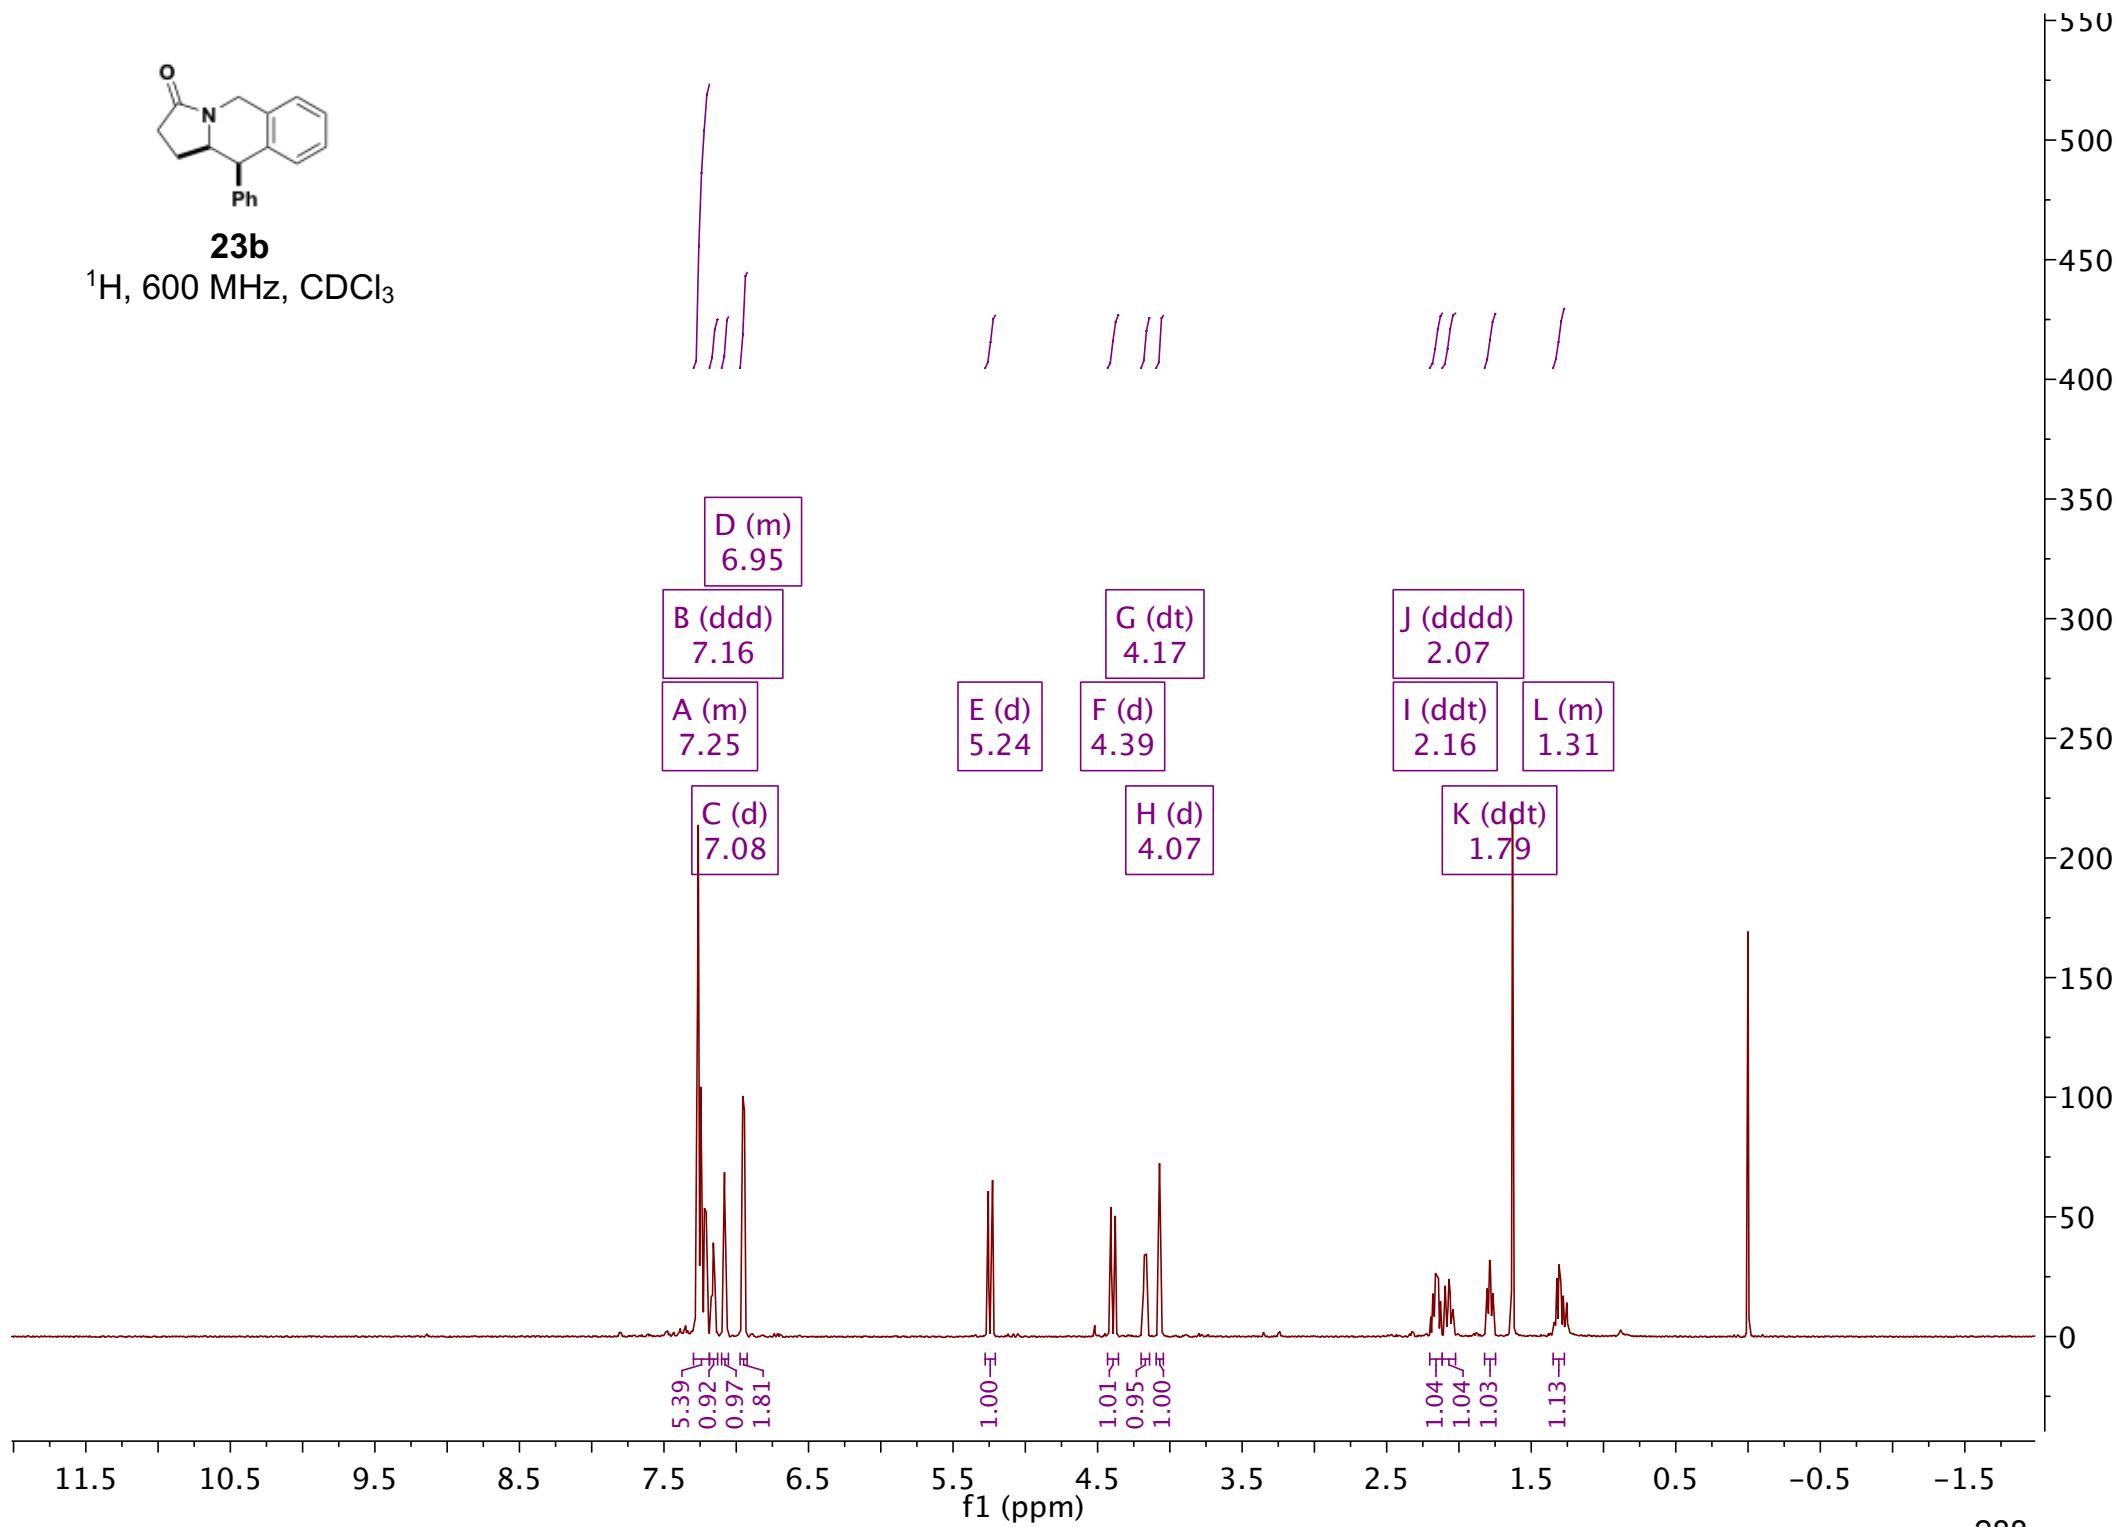

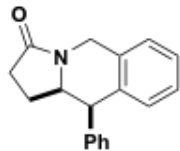

**23b**

$^{13}\text{C}$ , 150 MHz,  $\text{CDCl}_3$

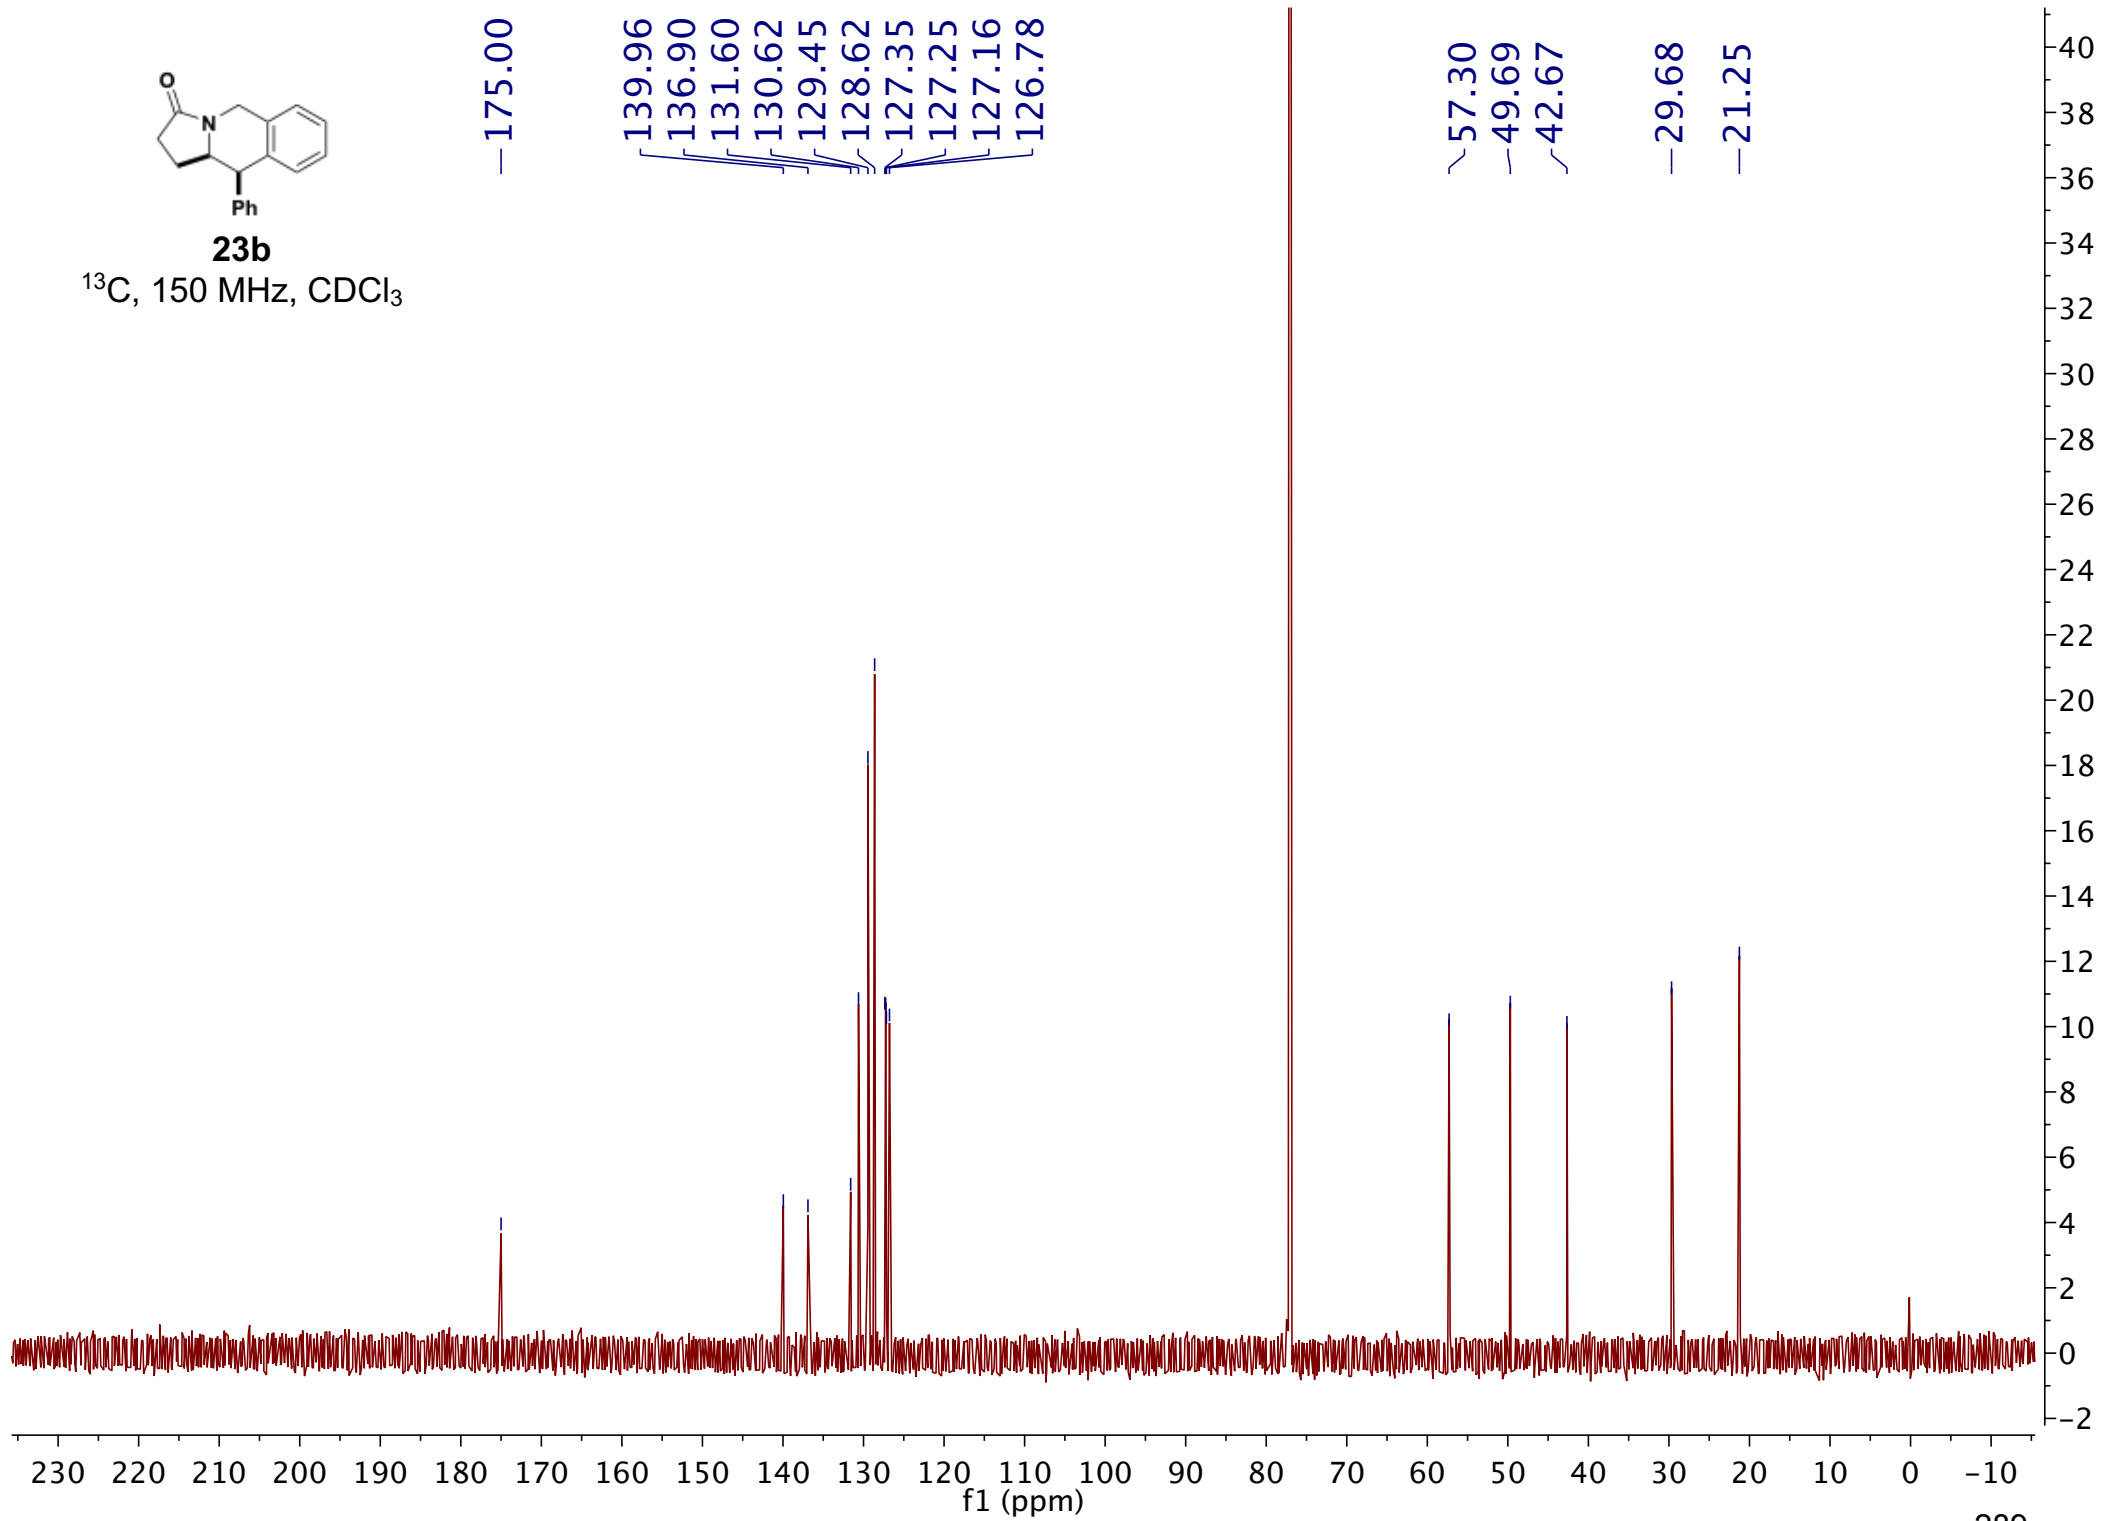

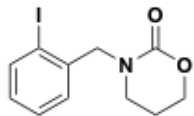

**86**

<sup>1</sup>H, 600 MHz, CDCl<sub>3</sub>

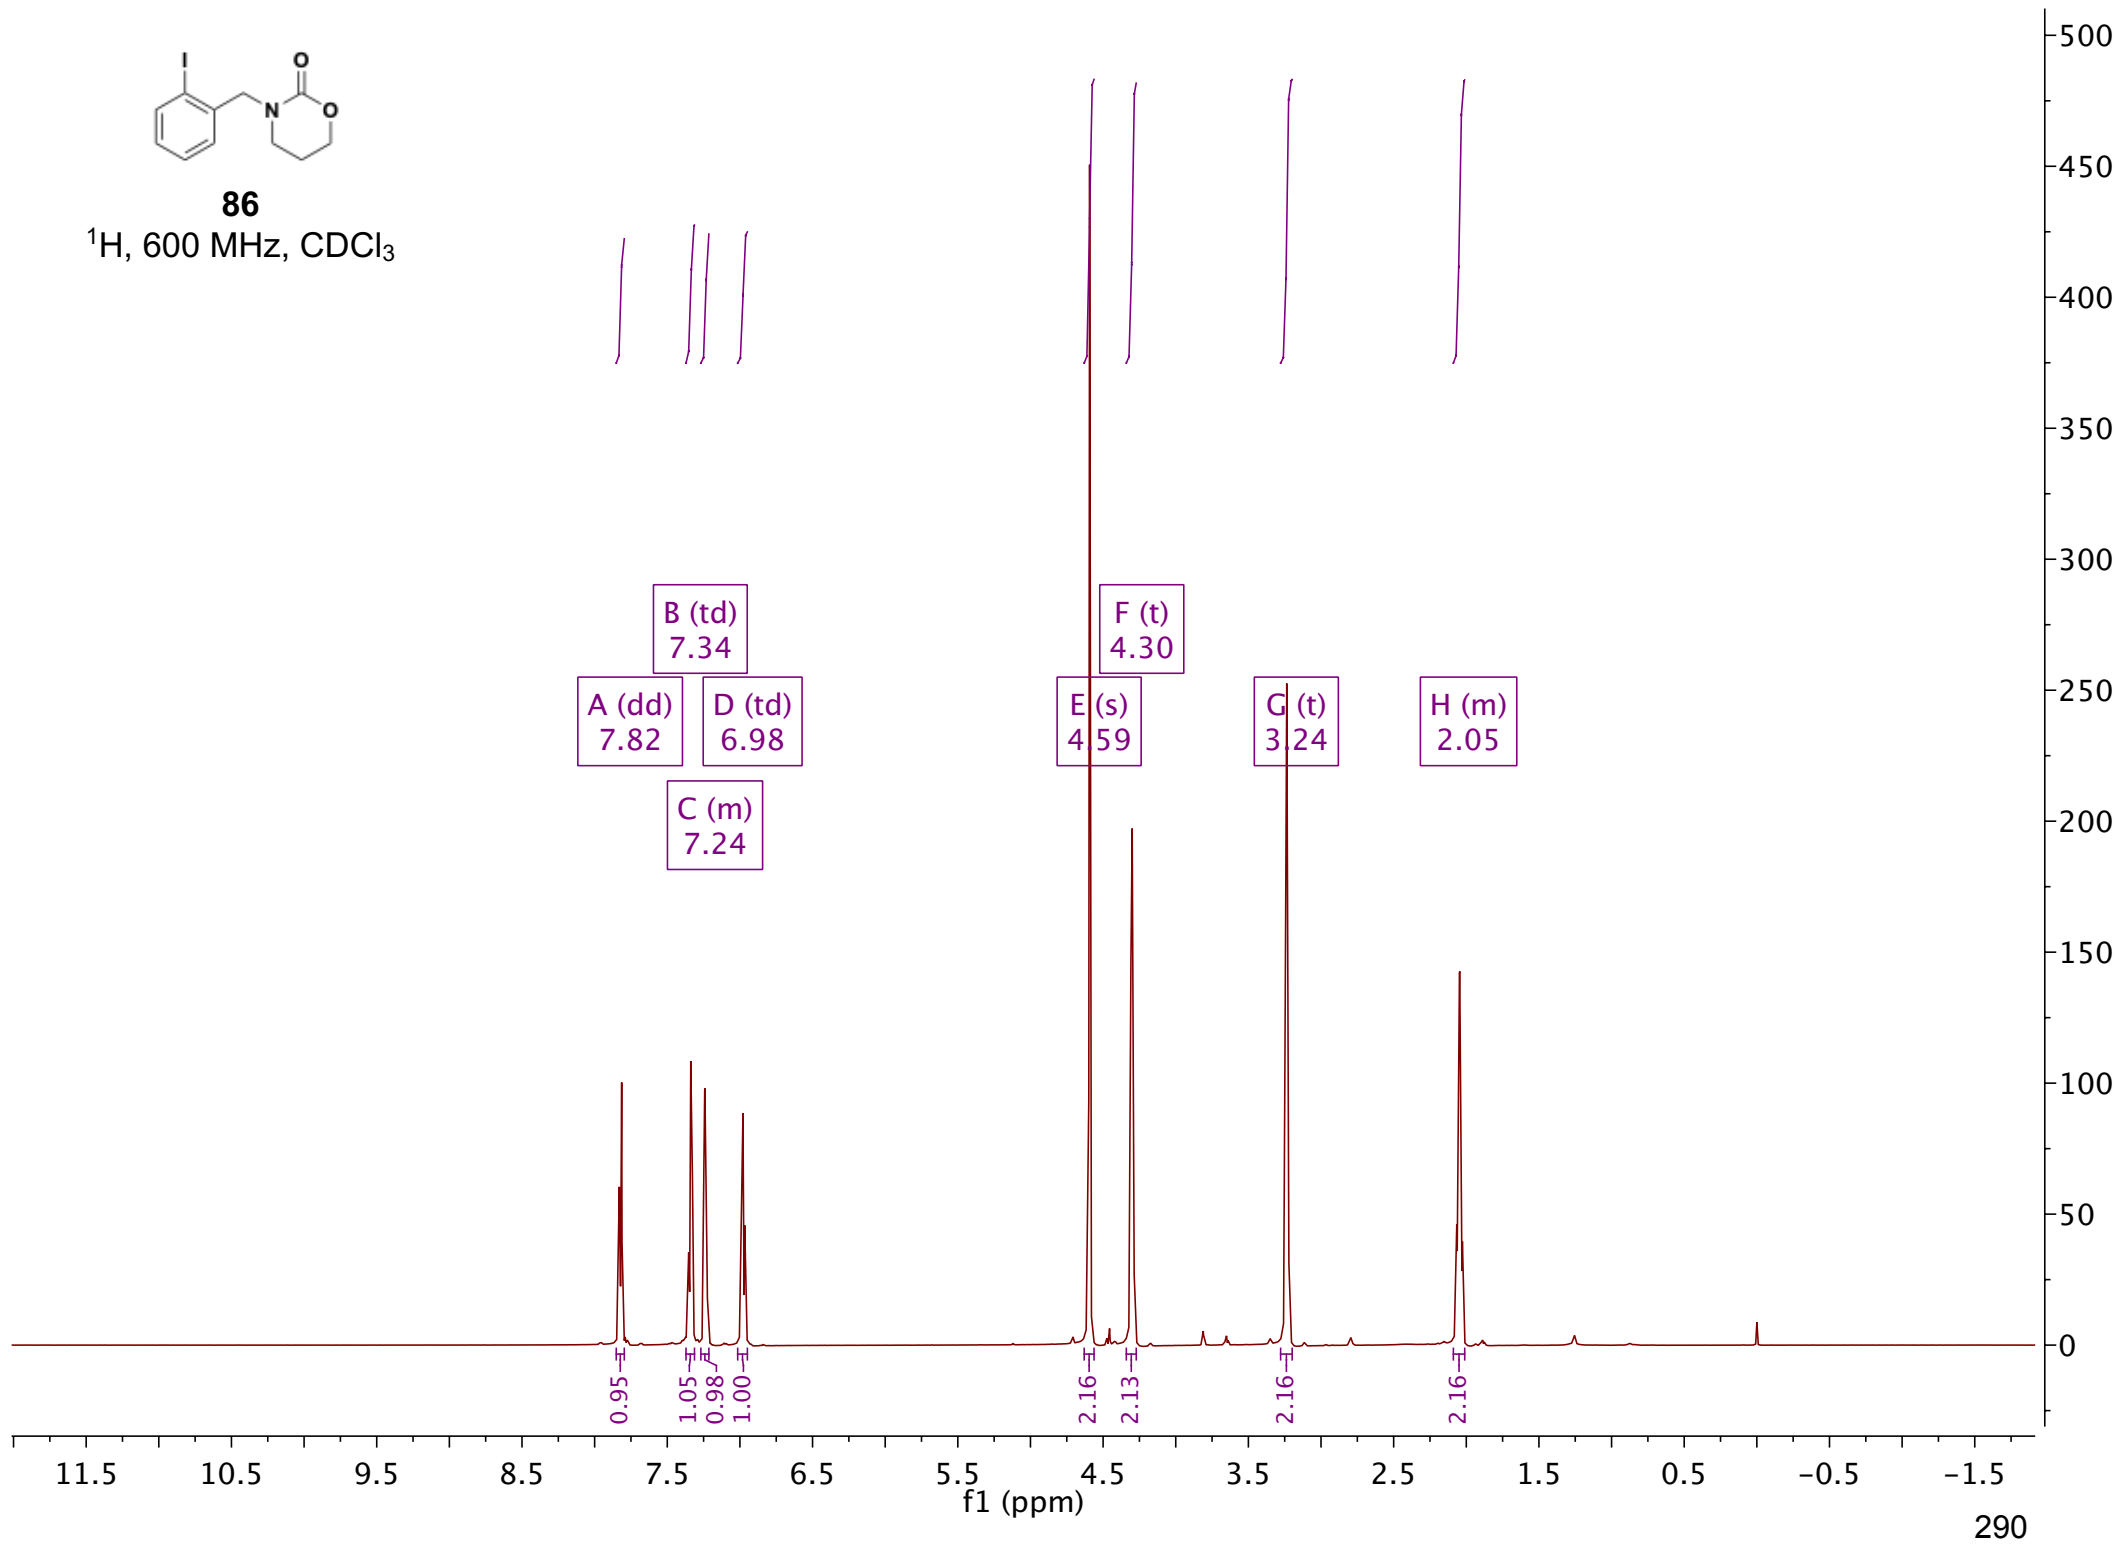



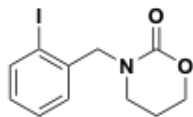

**86**

$^{13}\text{C}$ , 150 MHz,  $\text{CDCl}_3$

—153.68  
139.38  
138.12  
129.09  
128.51  
127.80

—98.58

—66.48

—56.89

—44.84

—22.05

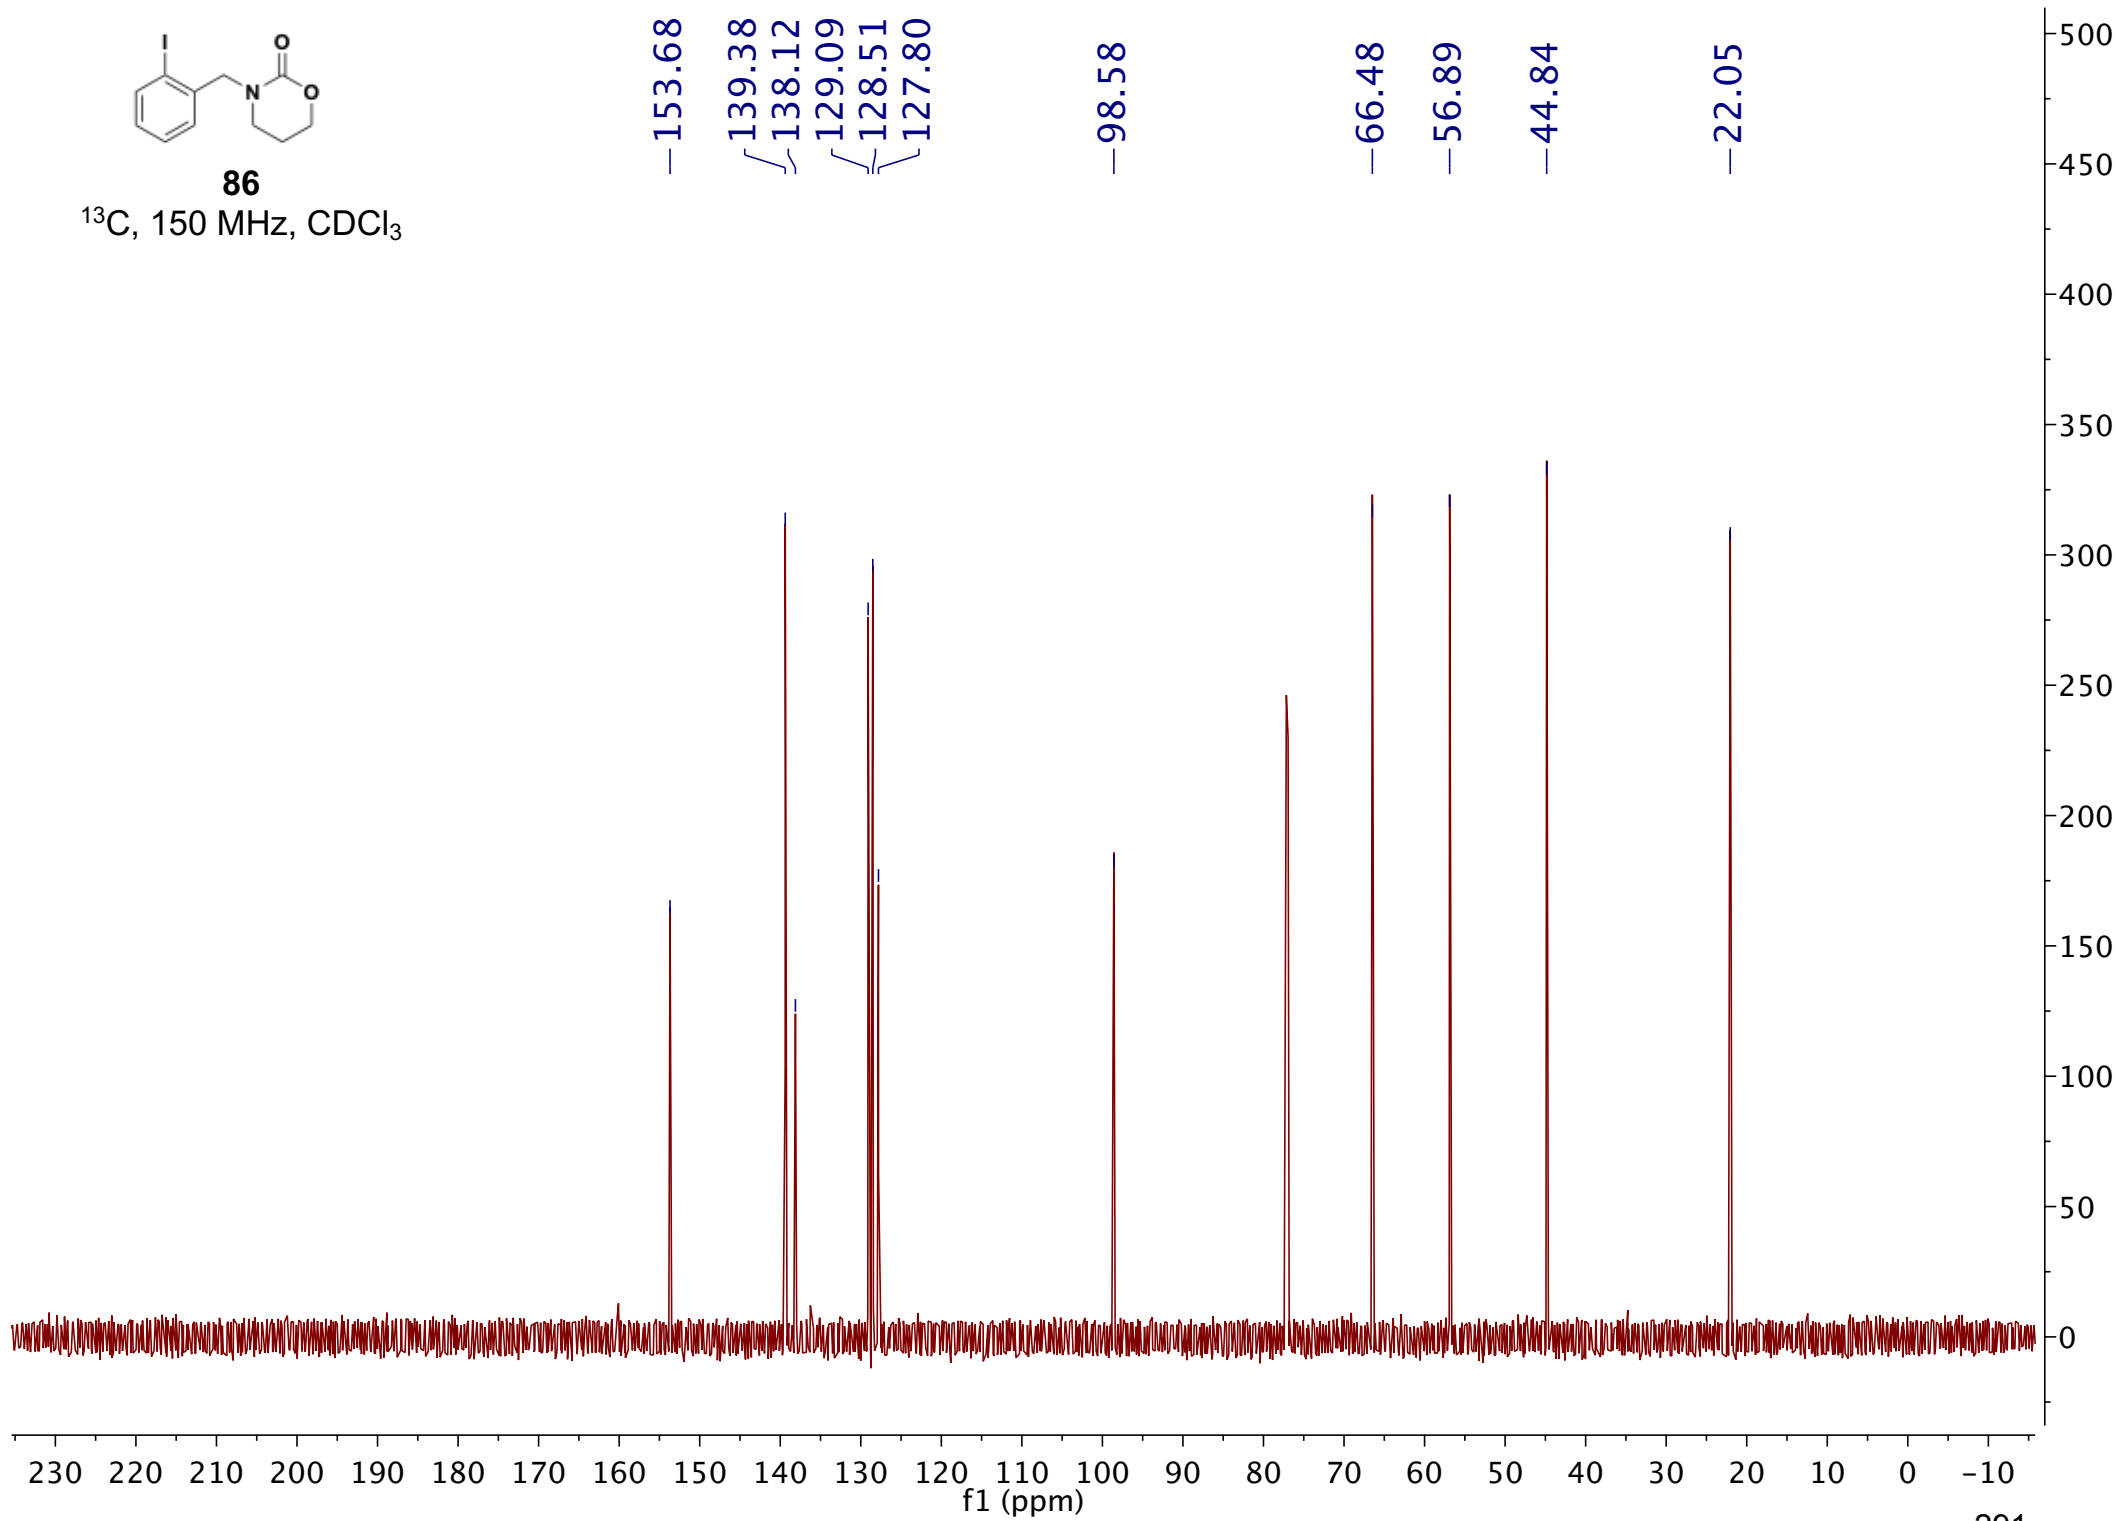

291

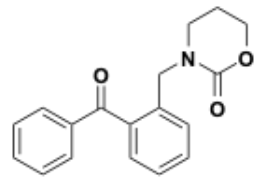

**87**

$^1\text{H}$ , 600 MHz,  $\text{CDCl}_3$

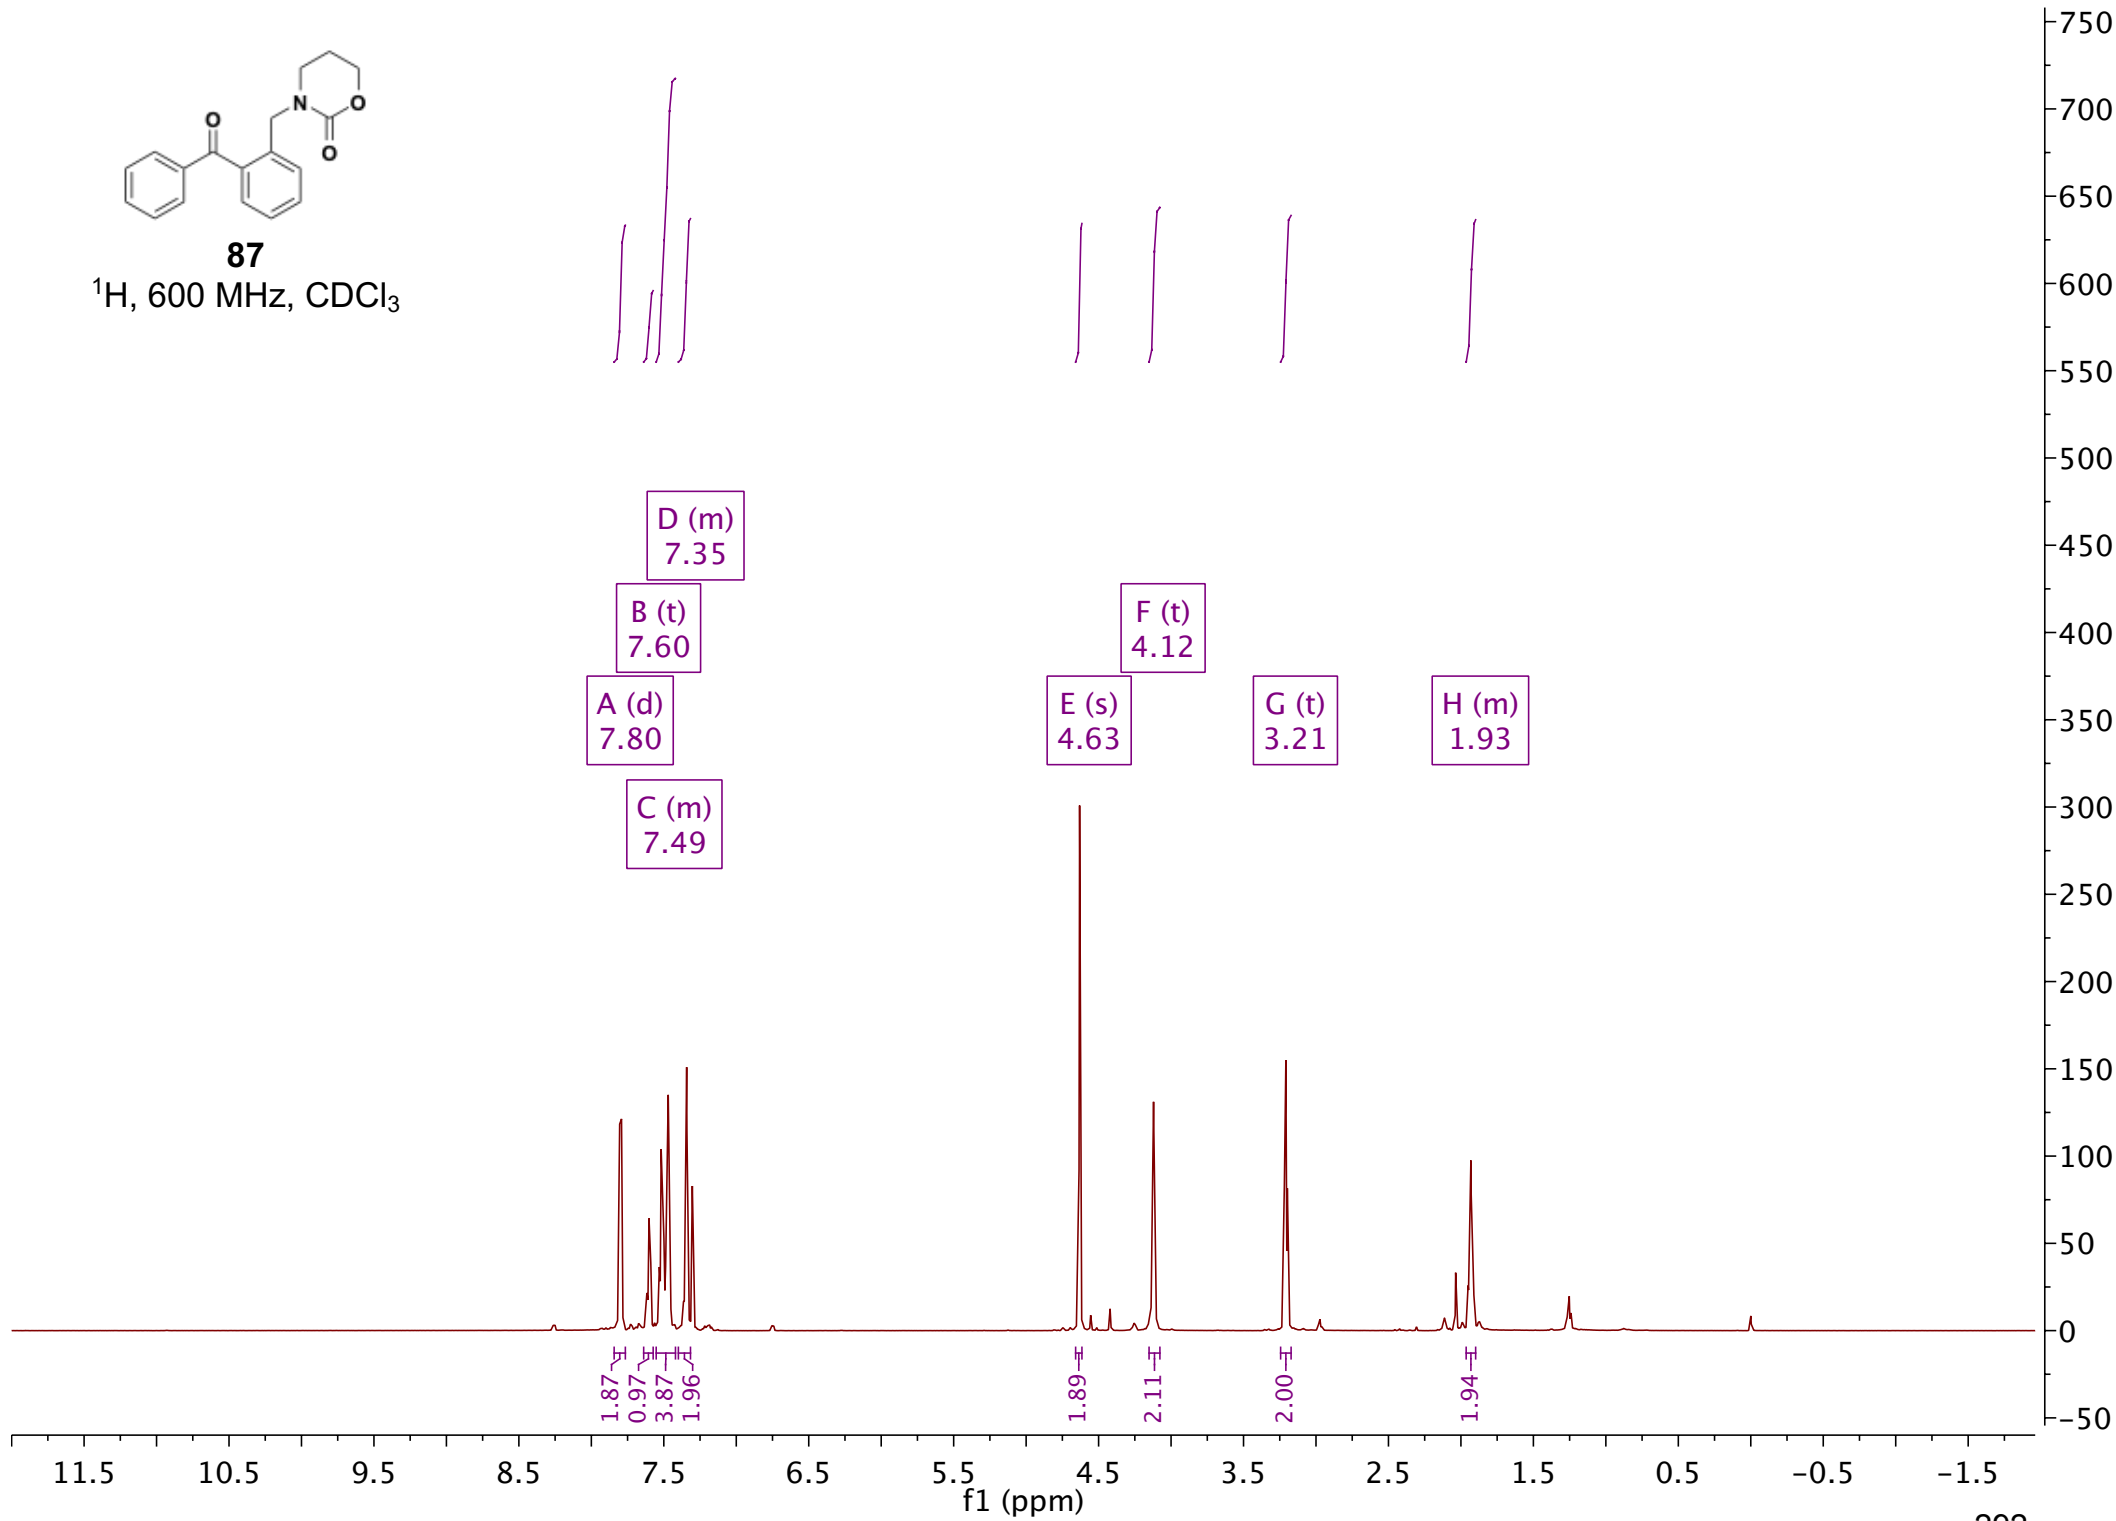

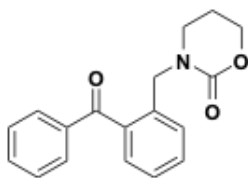

**87**

$^{13}\text{C}$ , 150 MHz,  $\text{CDCl}_3$

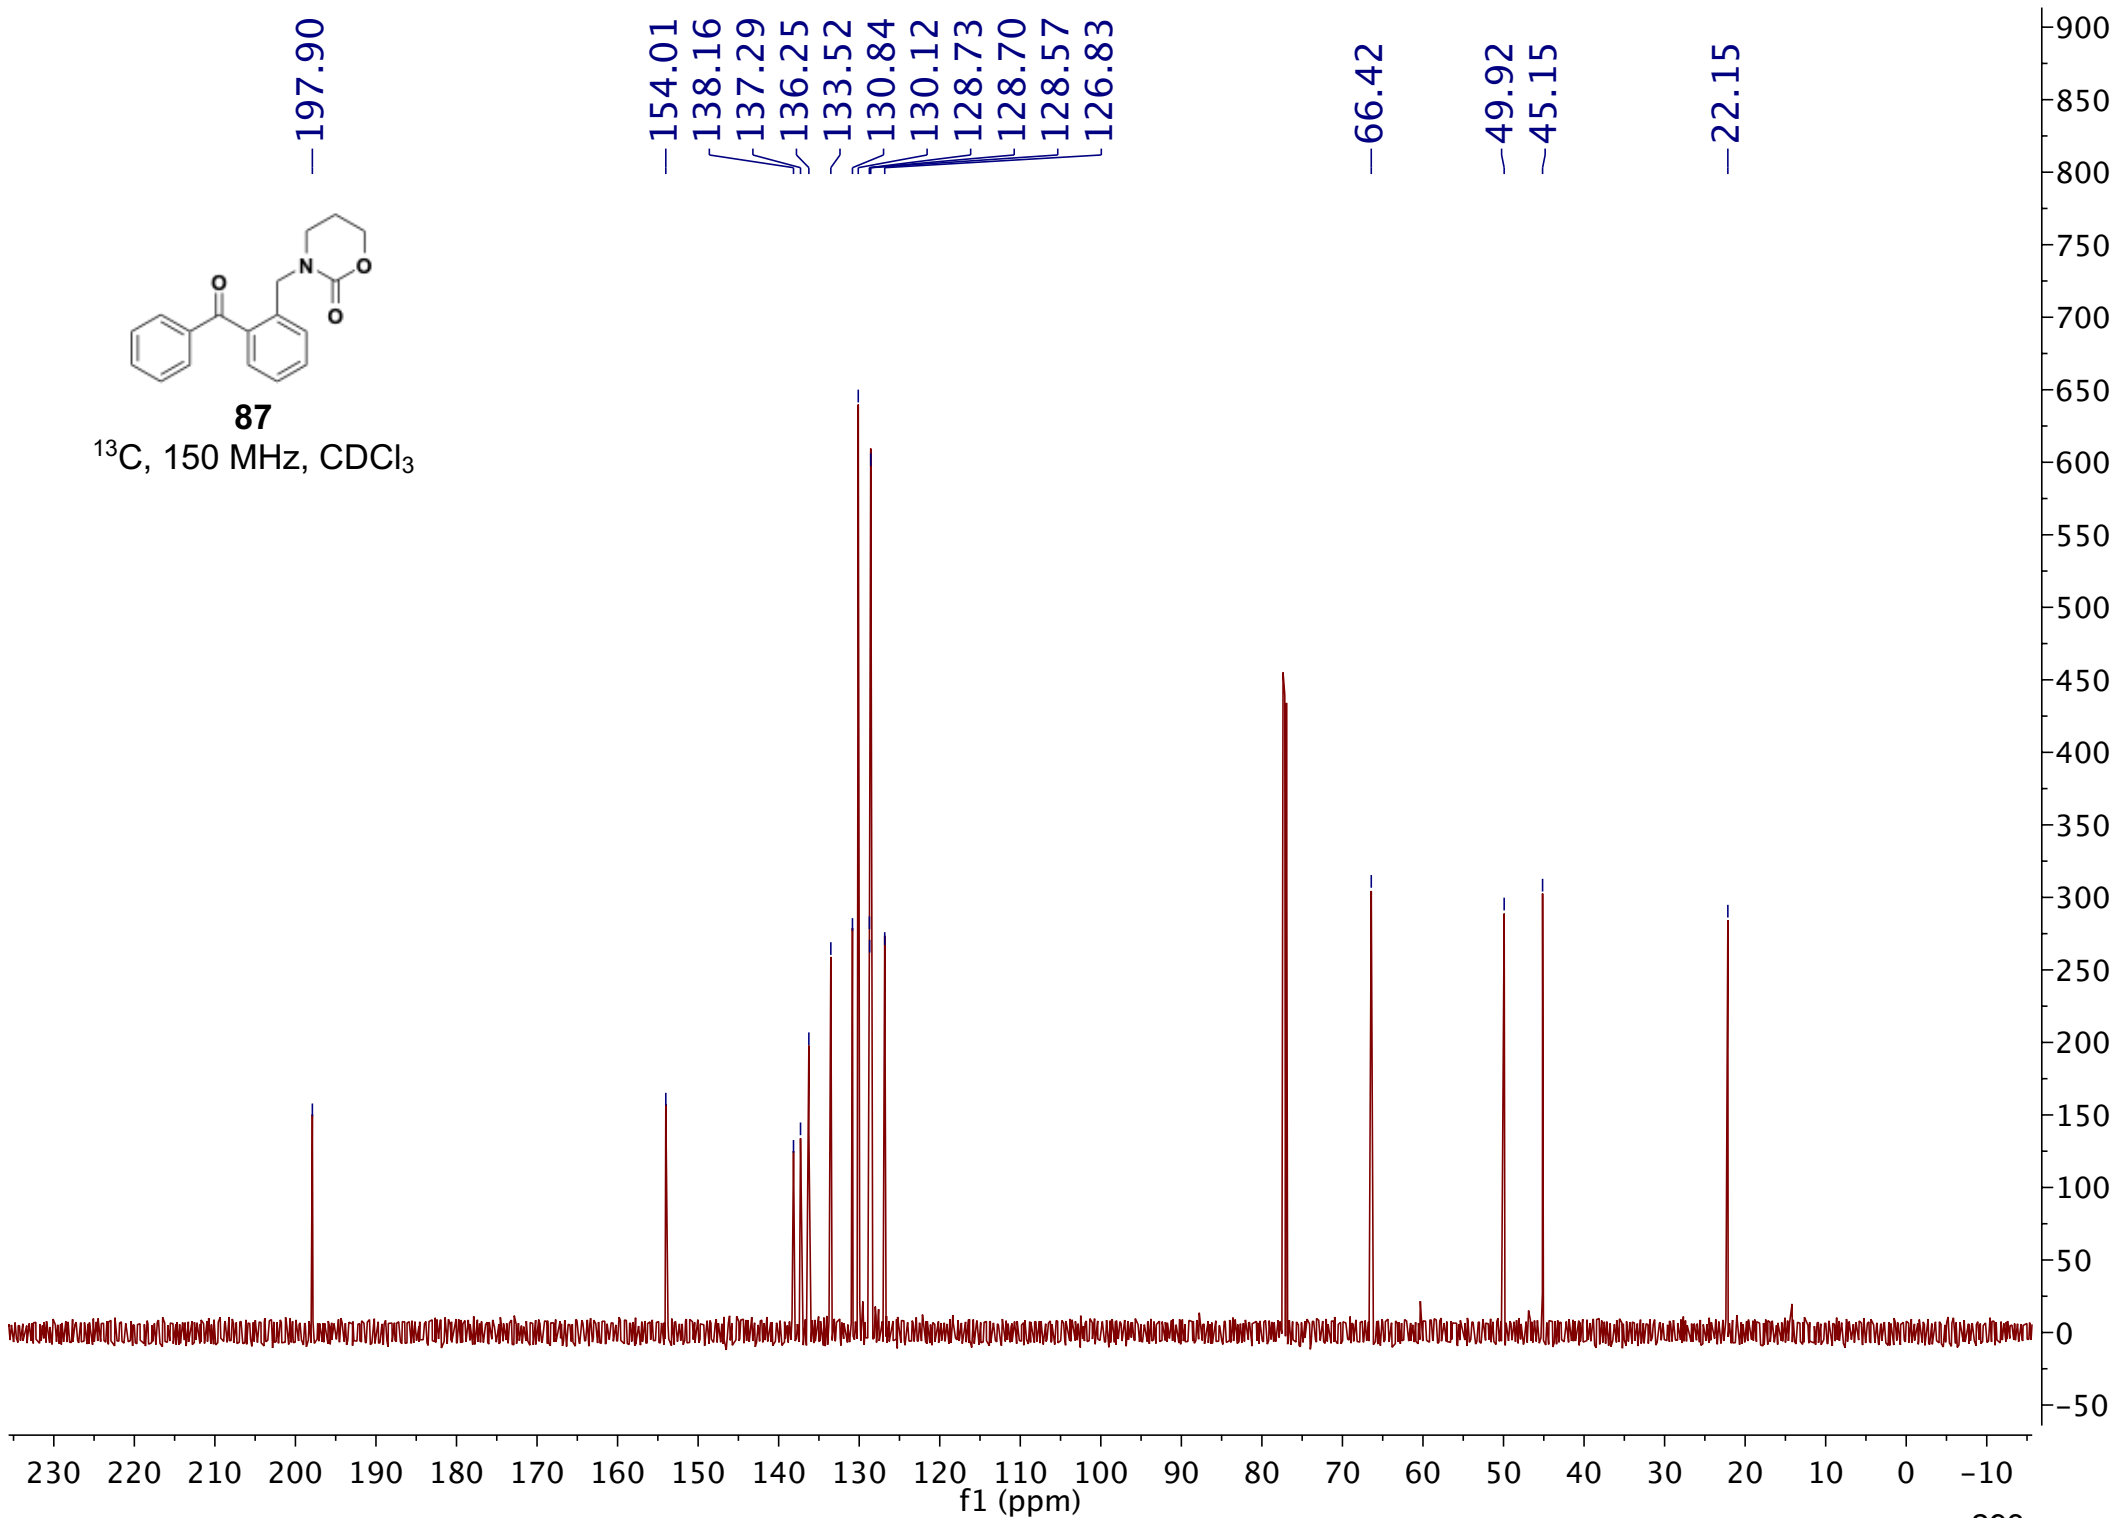

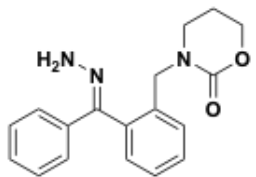

**22c**

<sup>1</sup>H, 600 MHz, CDCl<sub>3</sub>

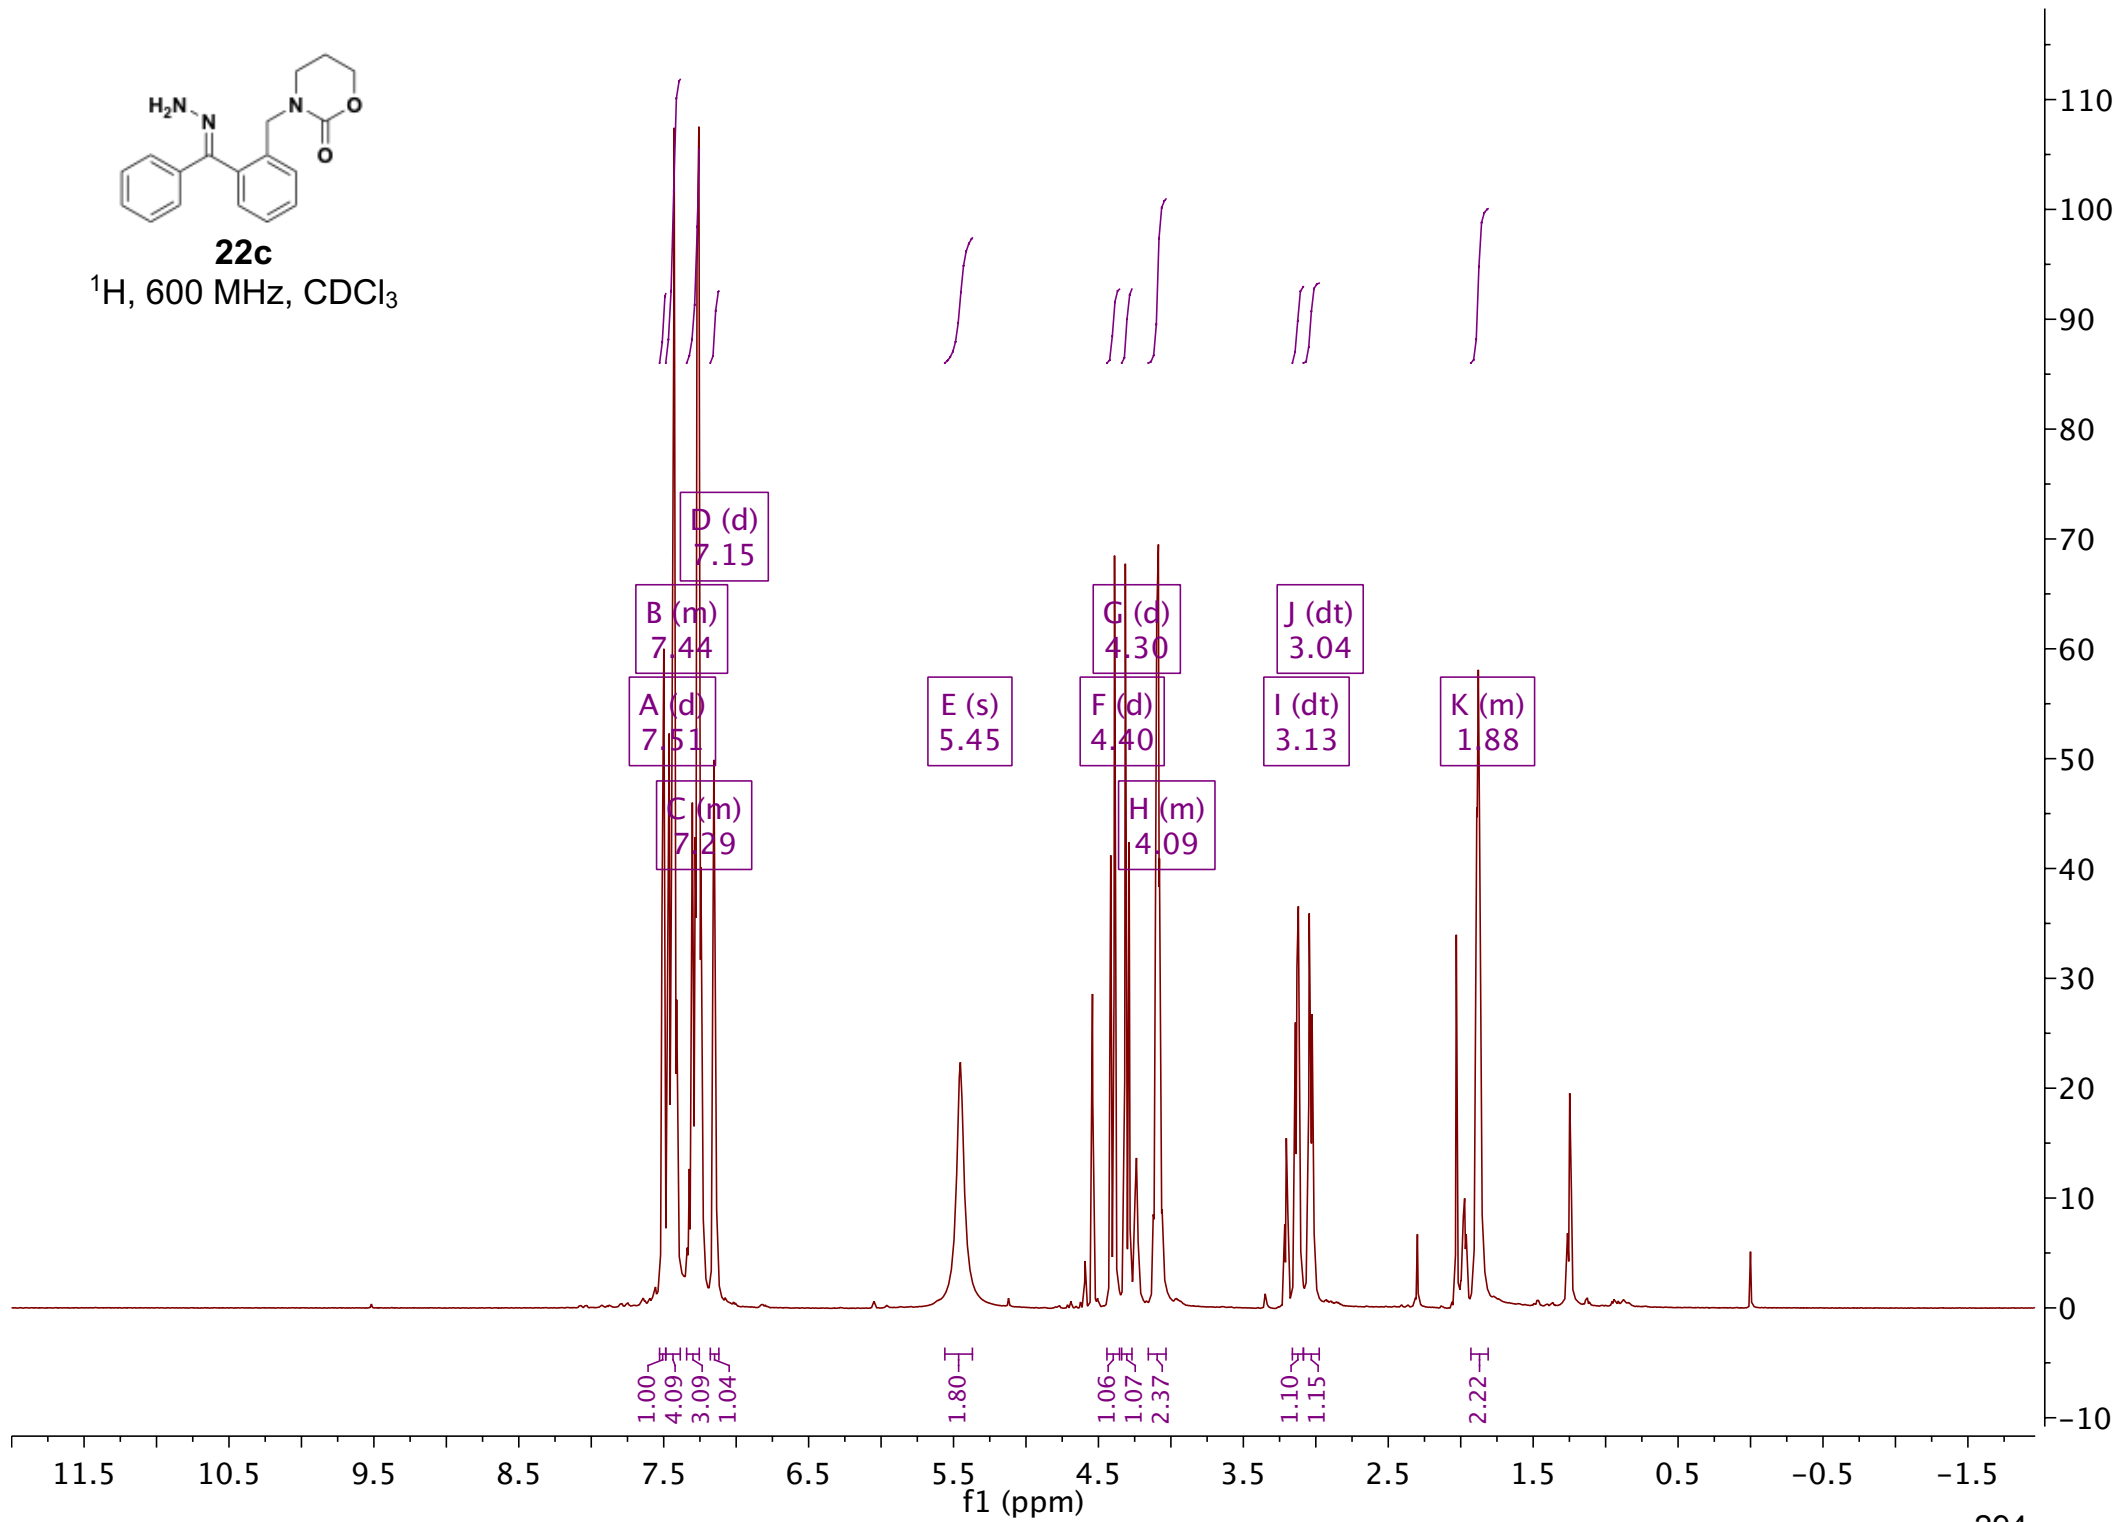

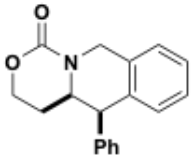

**23c**

$^1\text{H}$ , 600 MHz,  $\text{CDCl}_3$

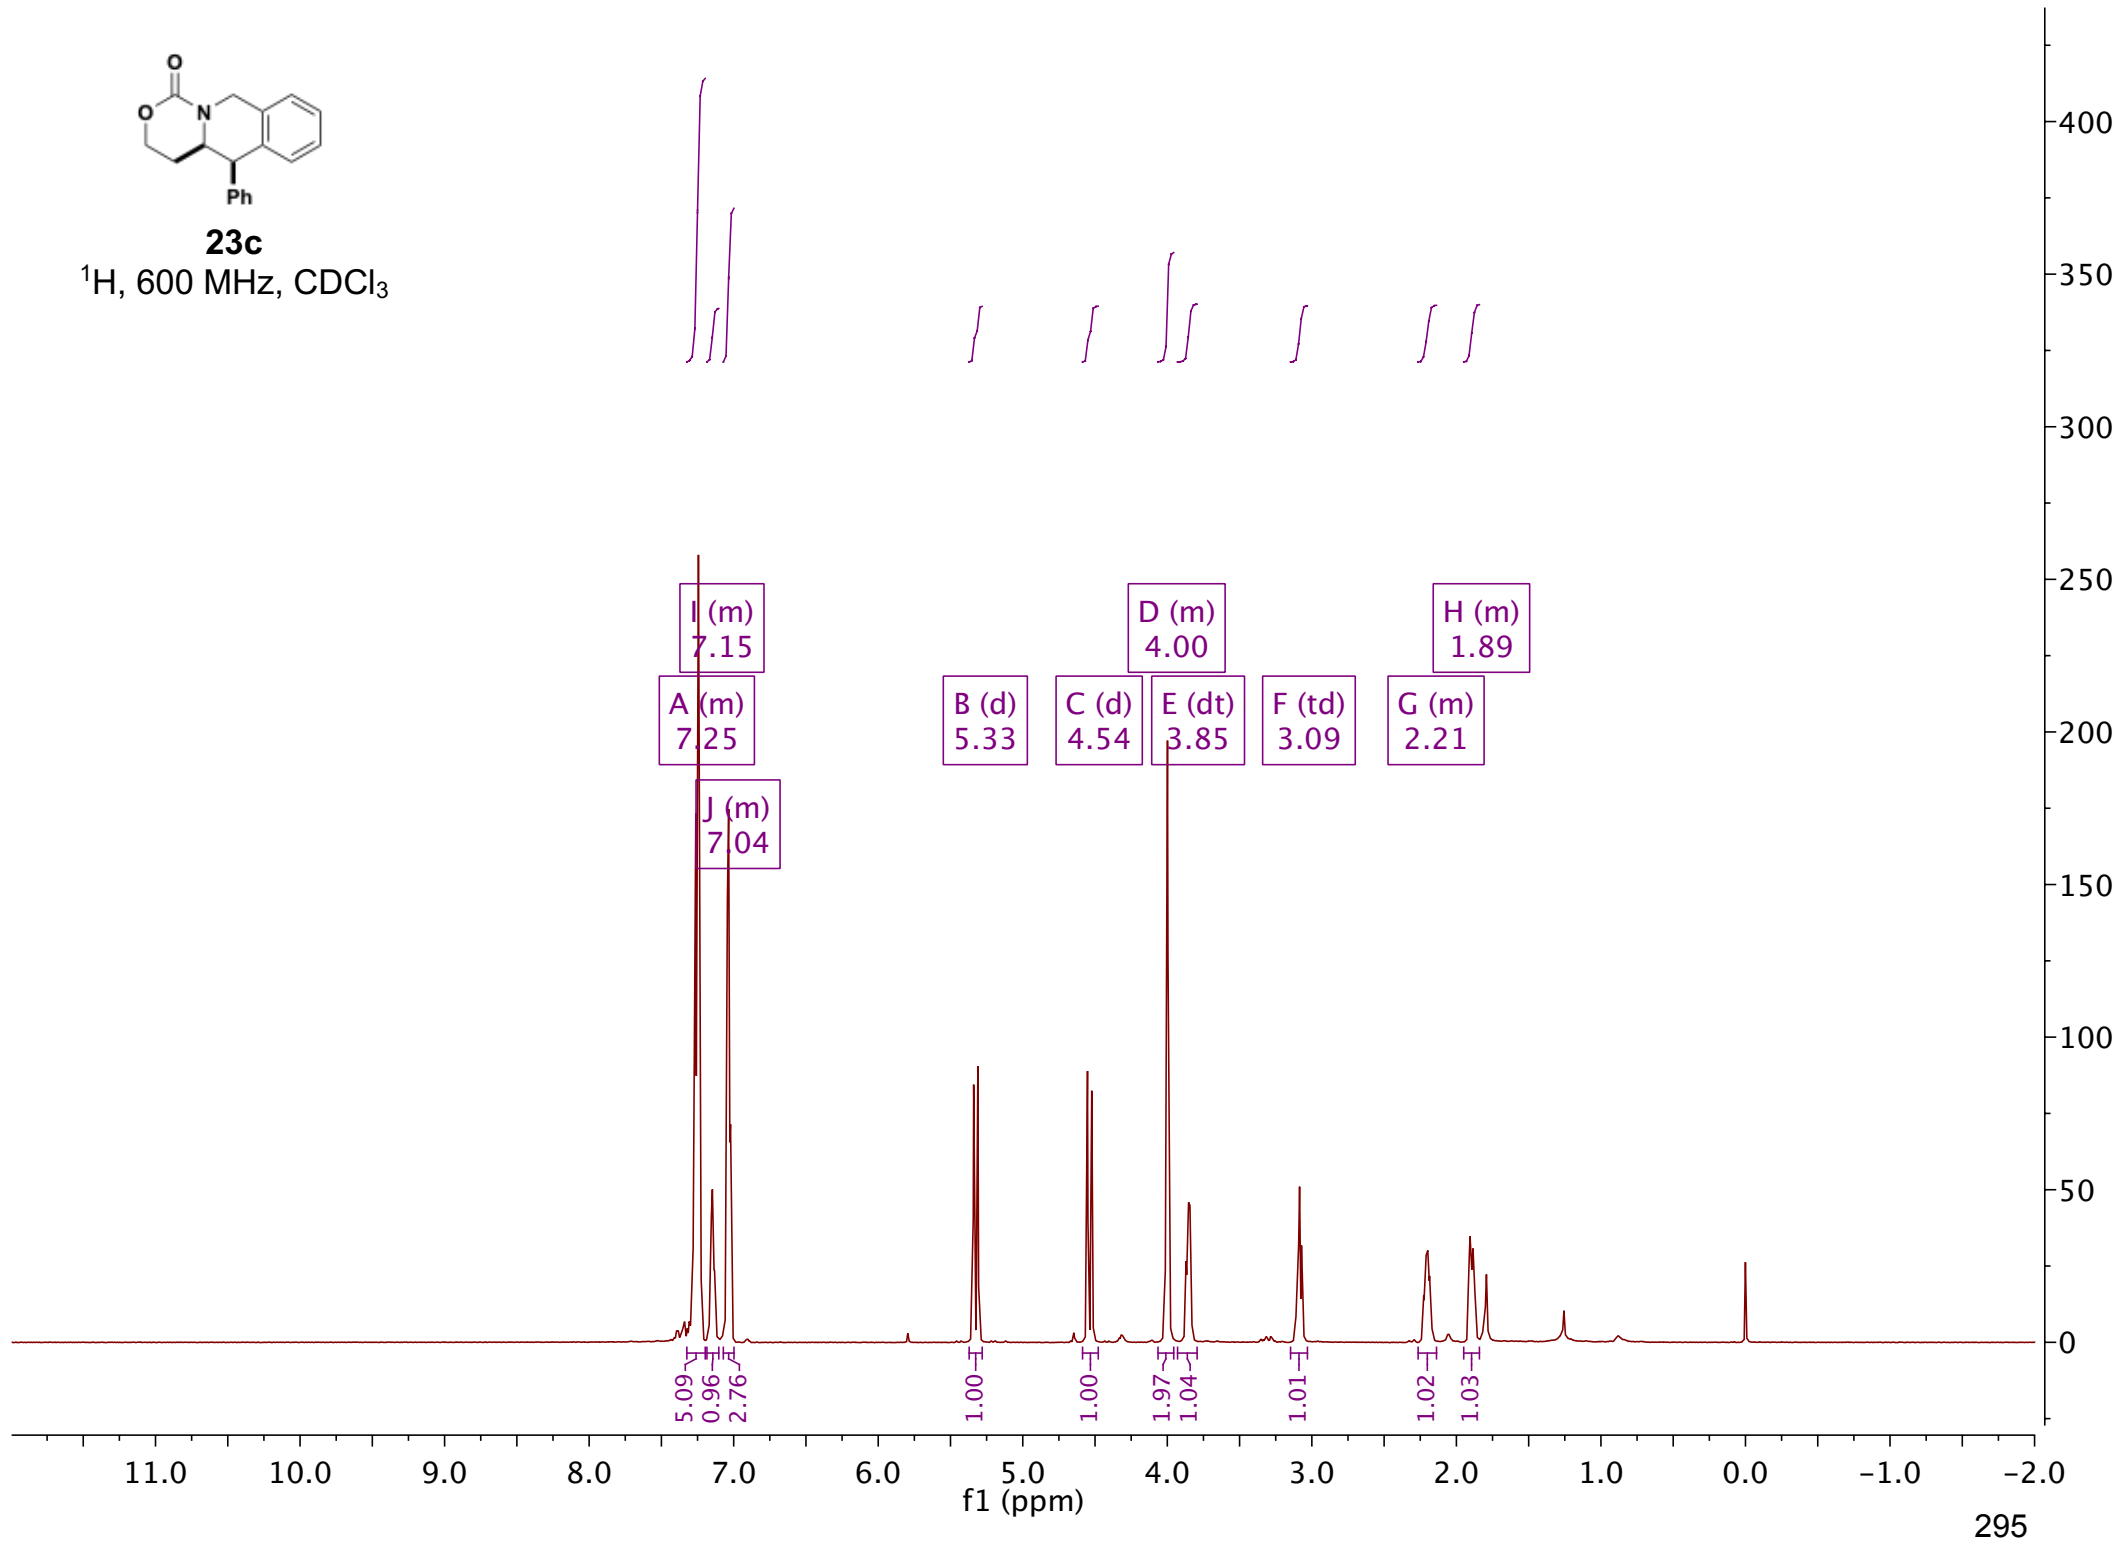

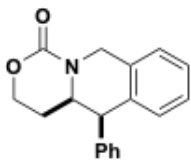

**23c**

$^{13}\text{C}$ , 150 MHz,  $\text{CDCl}_3$

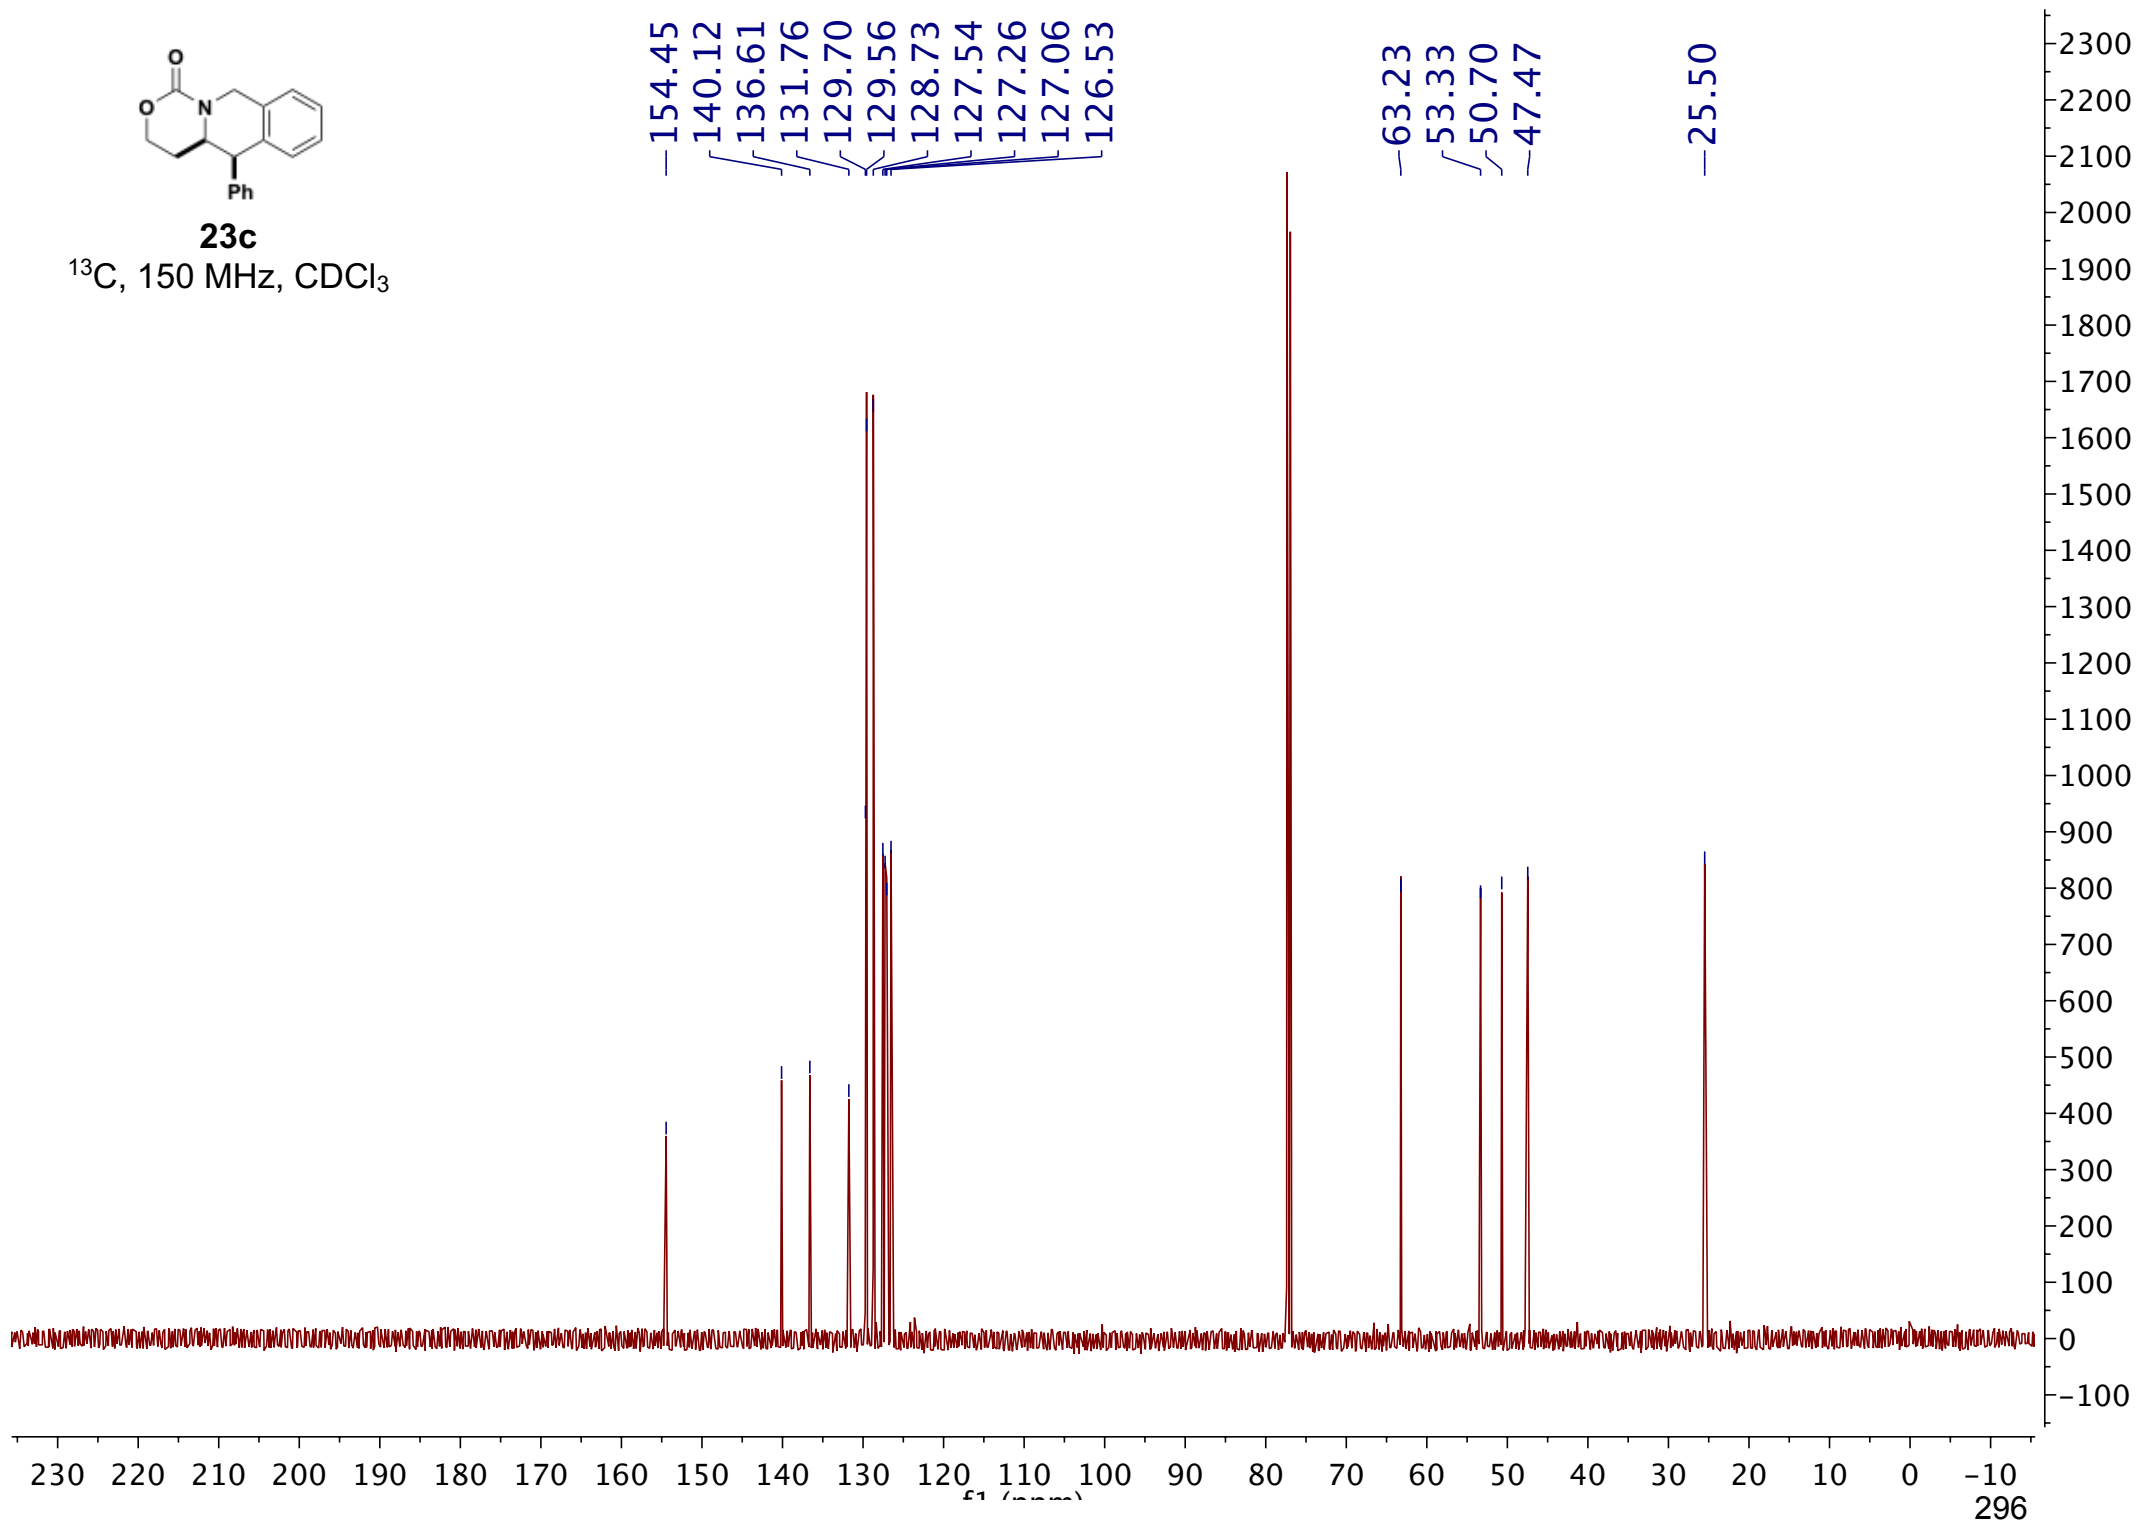

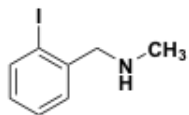

**88**

<sup>1</sup>H, 600 MHz, CDCl<sub>3</sub>

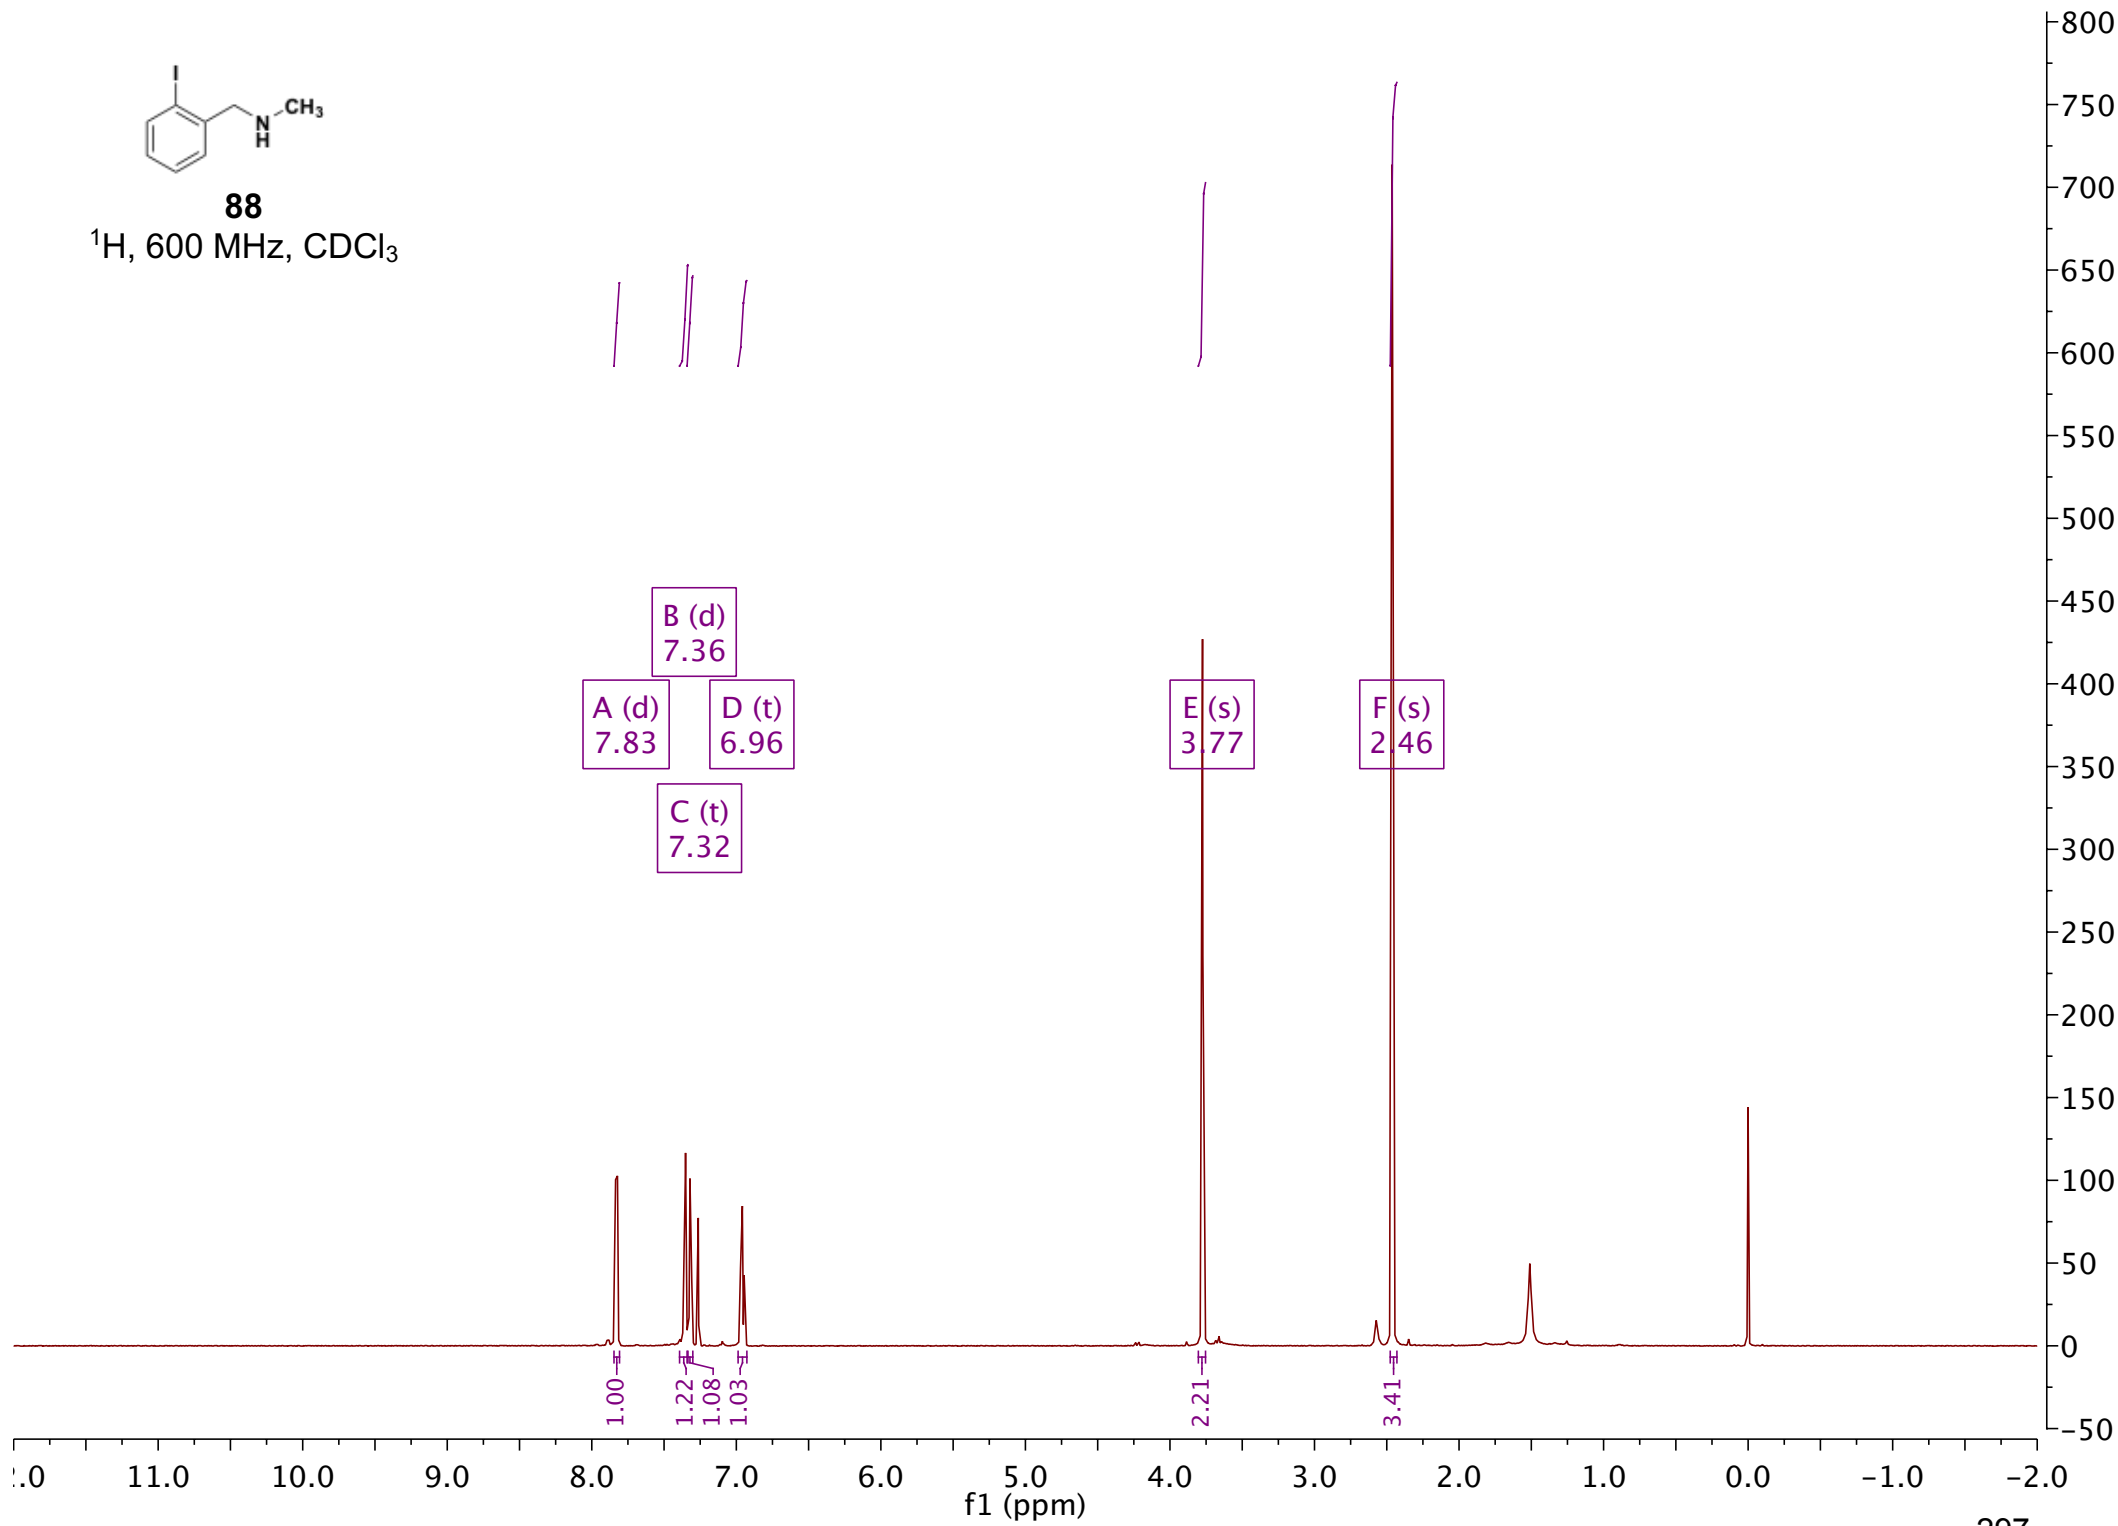

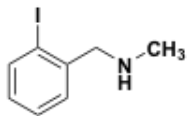

**88**

$^{13}\text{C}$ , 150 MHz,  $\text{CDCl}_3$

142.14  
139.57  
129.81  
128.92  
128.38

-99.78

-60.32

-35.98

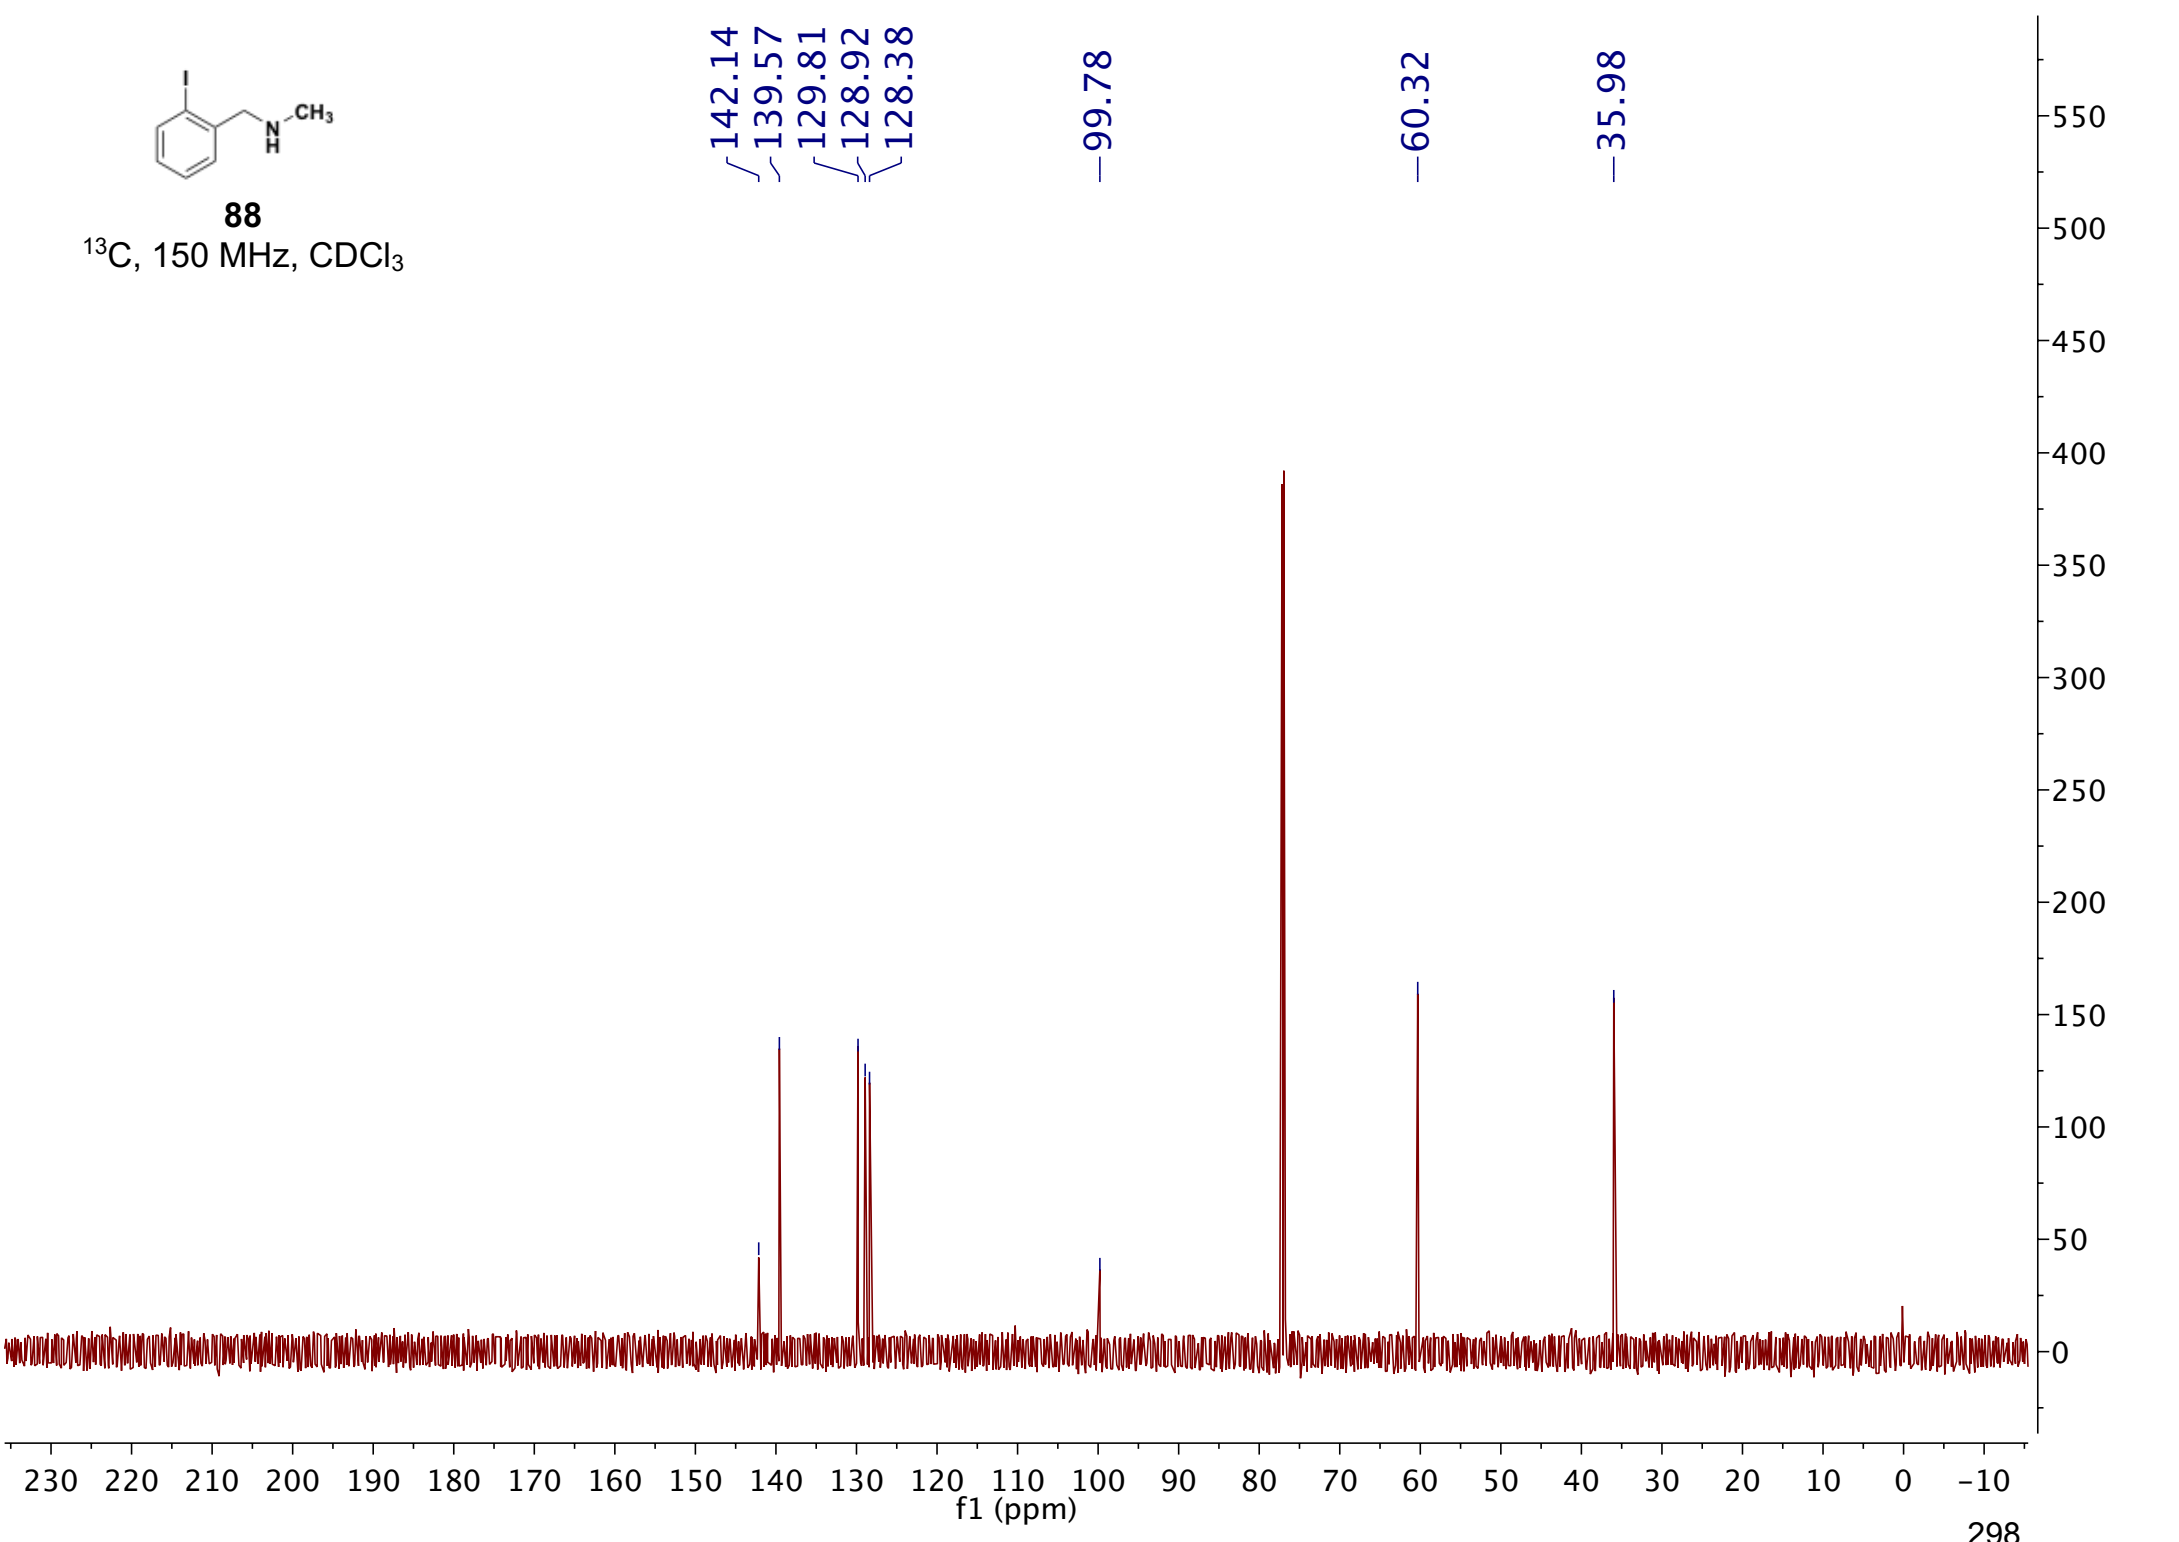



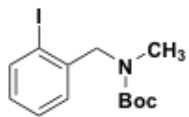

**89**

<sup>1</sup>H, 600 MHz, CDCl<sub>3</sub>

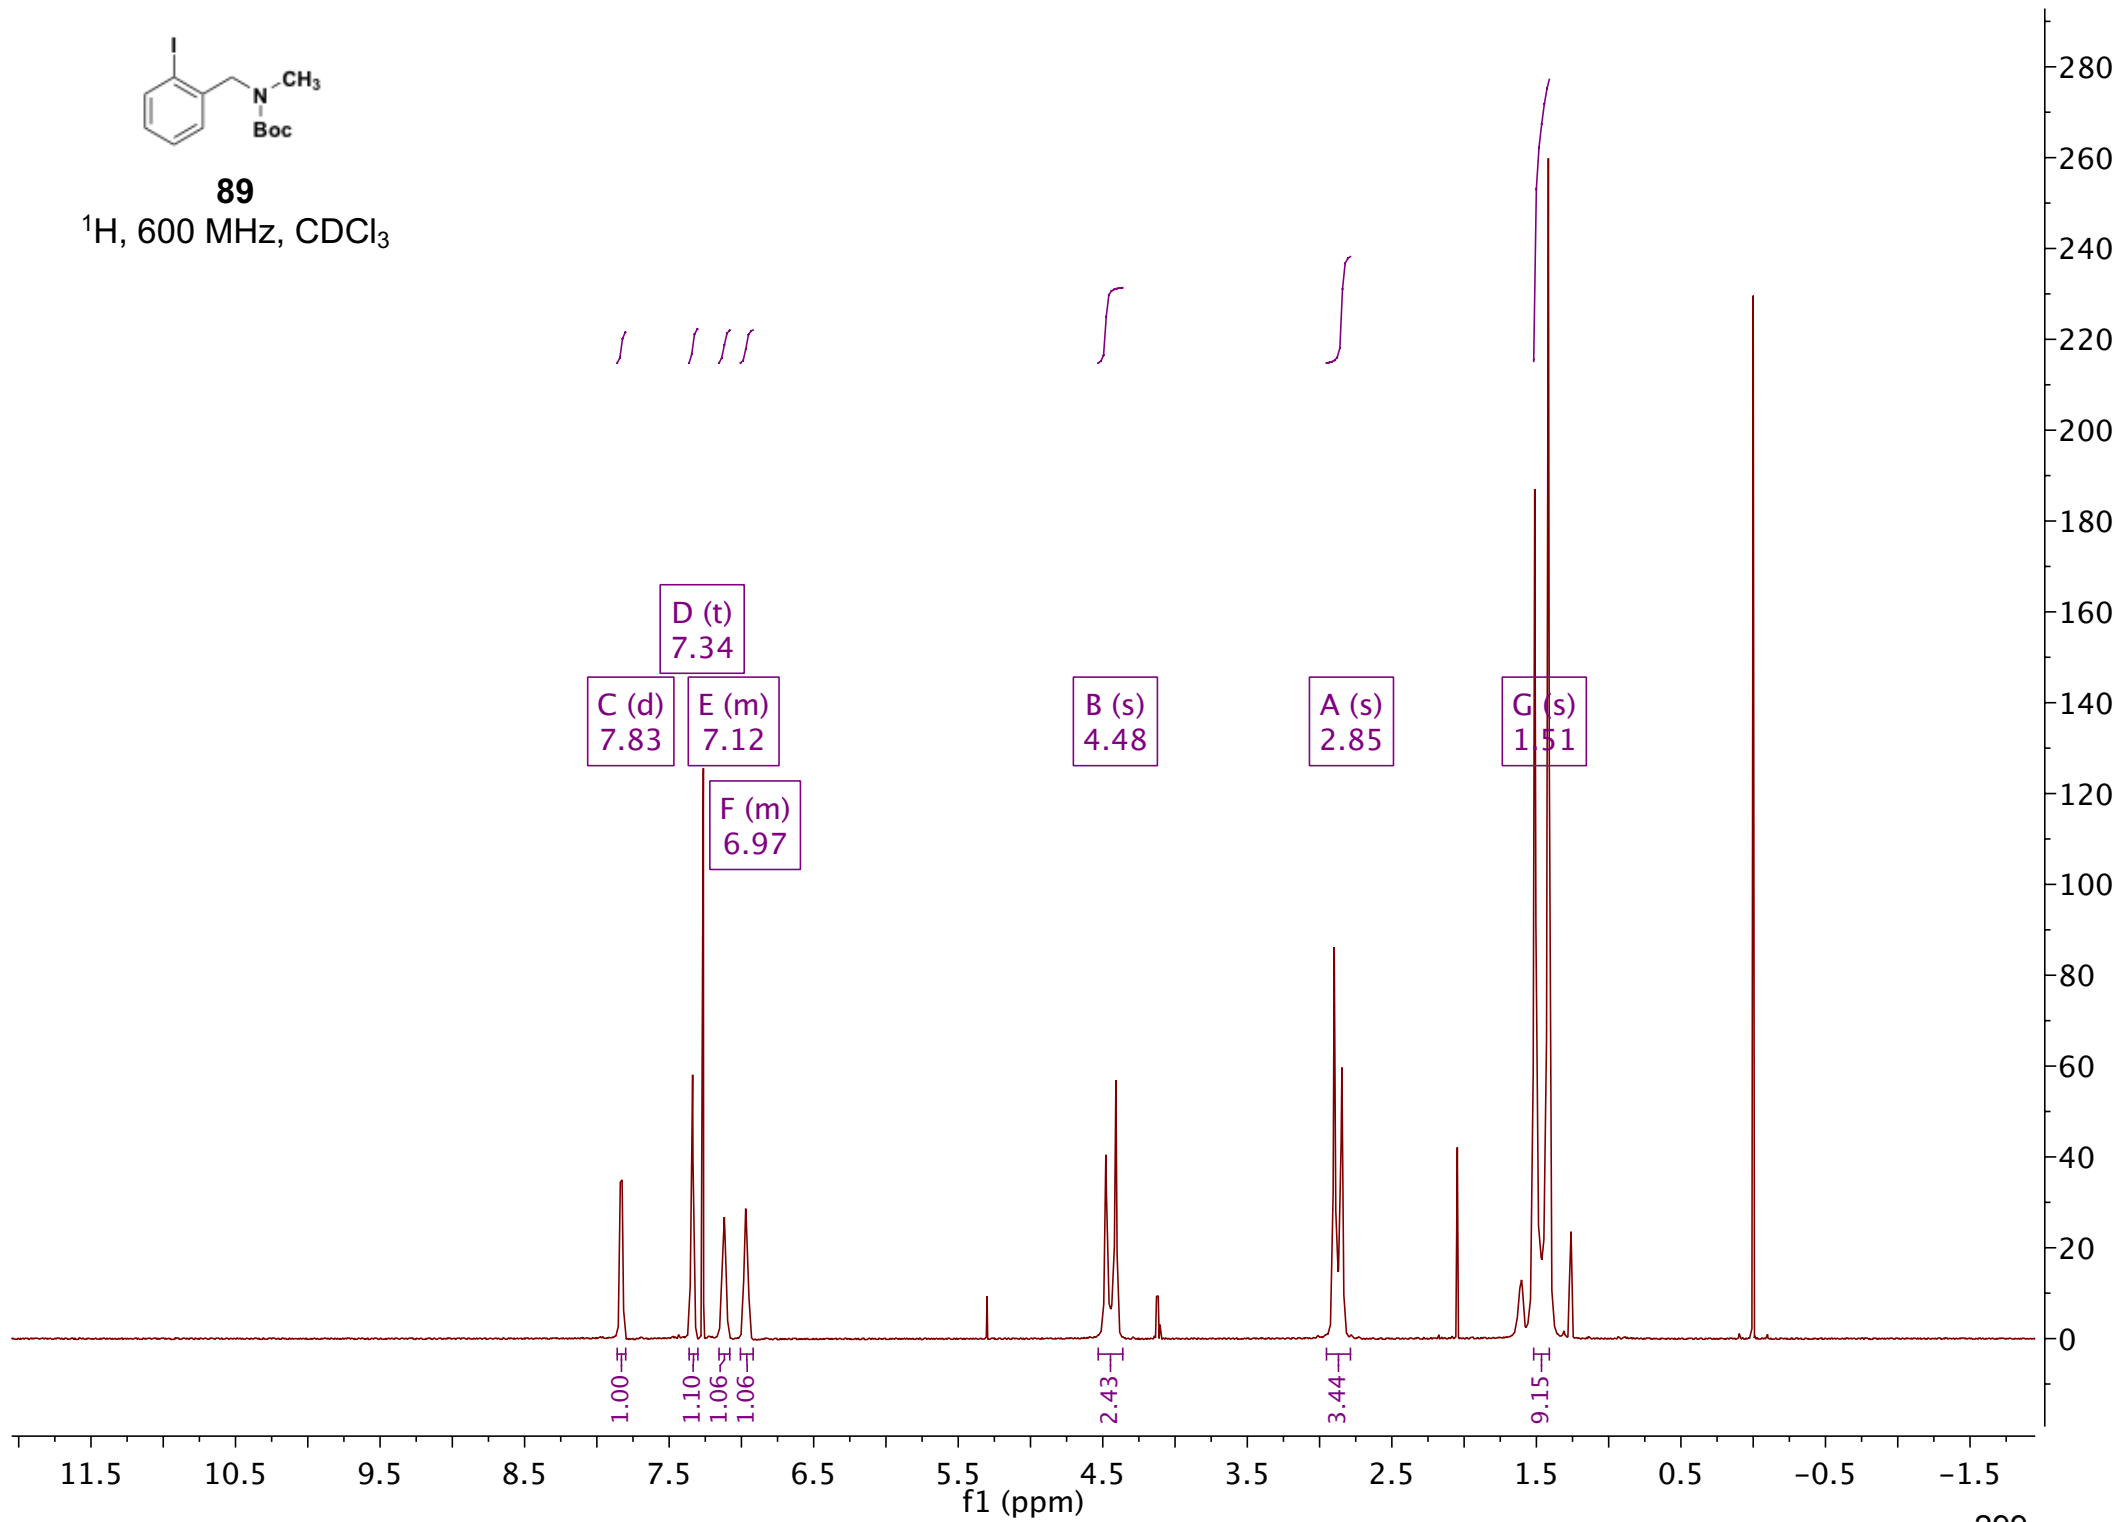

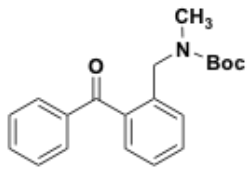

**90**

<sup>1</sup>H, 600 MHz, CDCl<sub>3</sub>

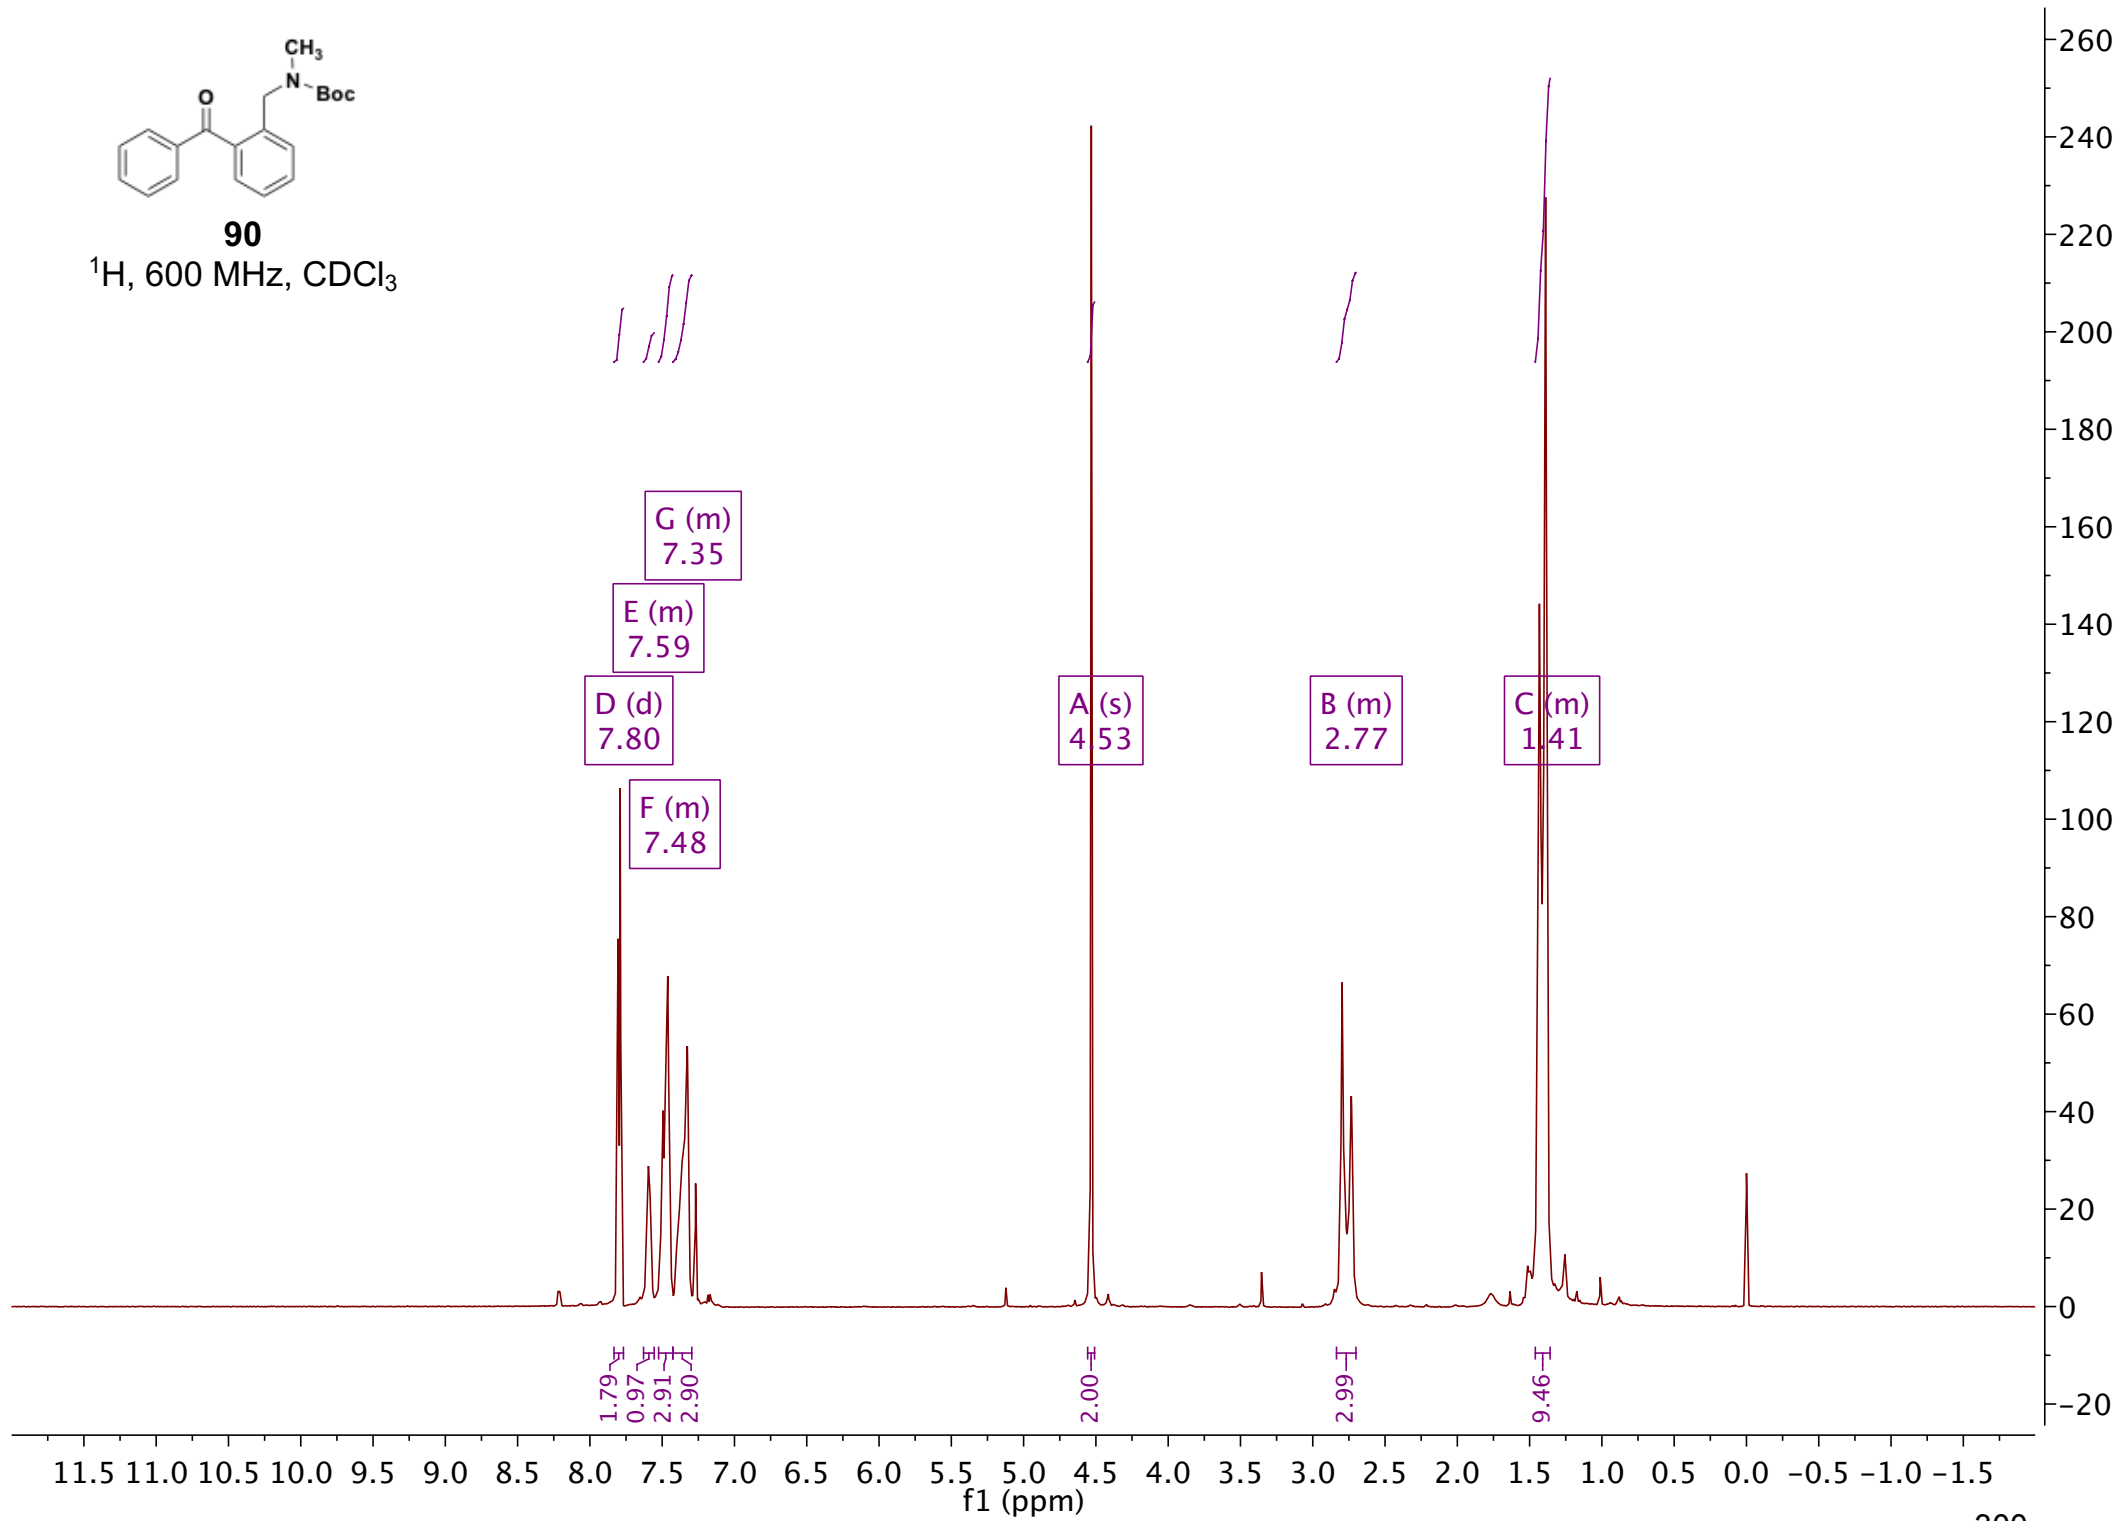

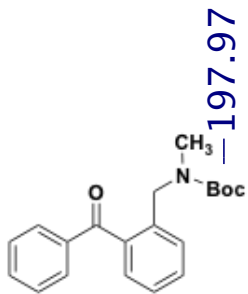

**90**

$^{13}\text{C}$ , 150 MHz,  $\text{CDCl}_3$

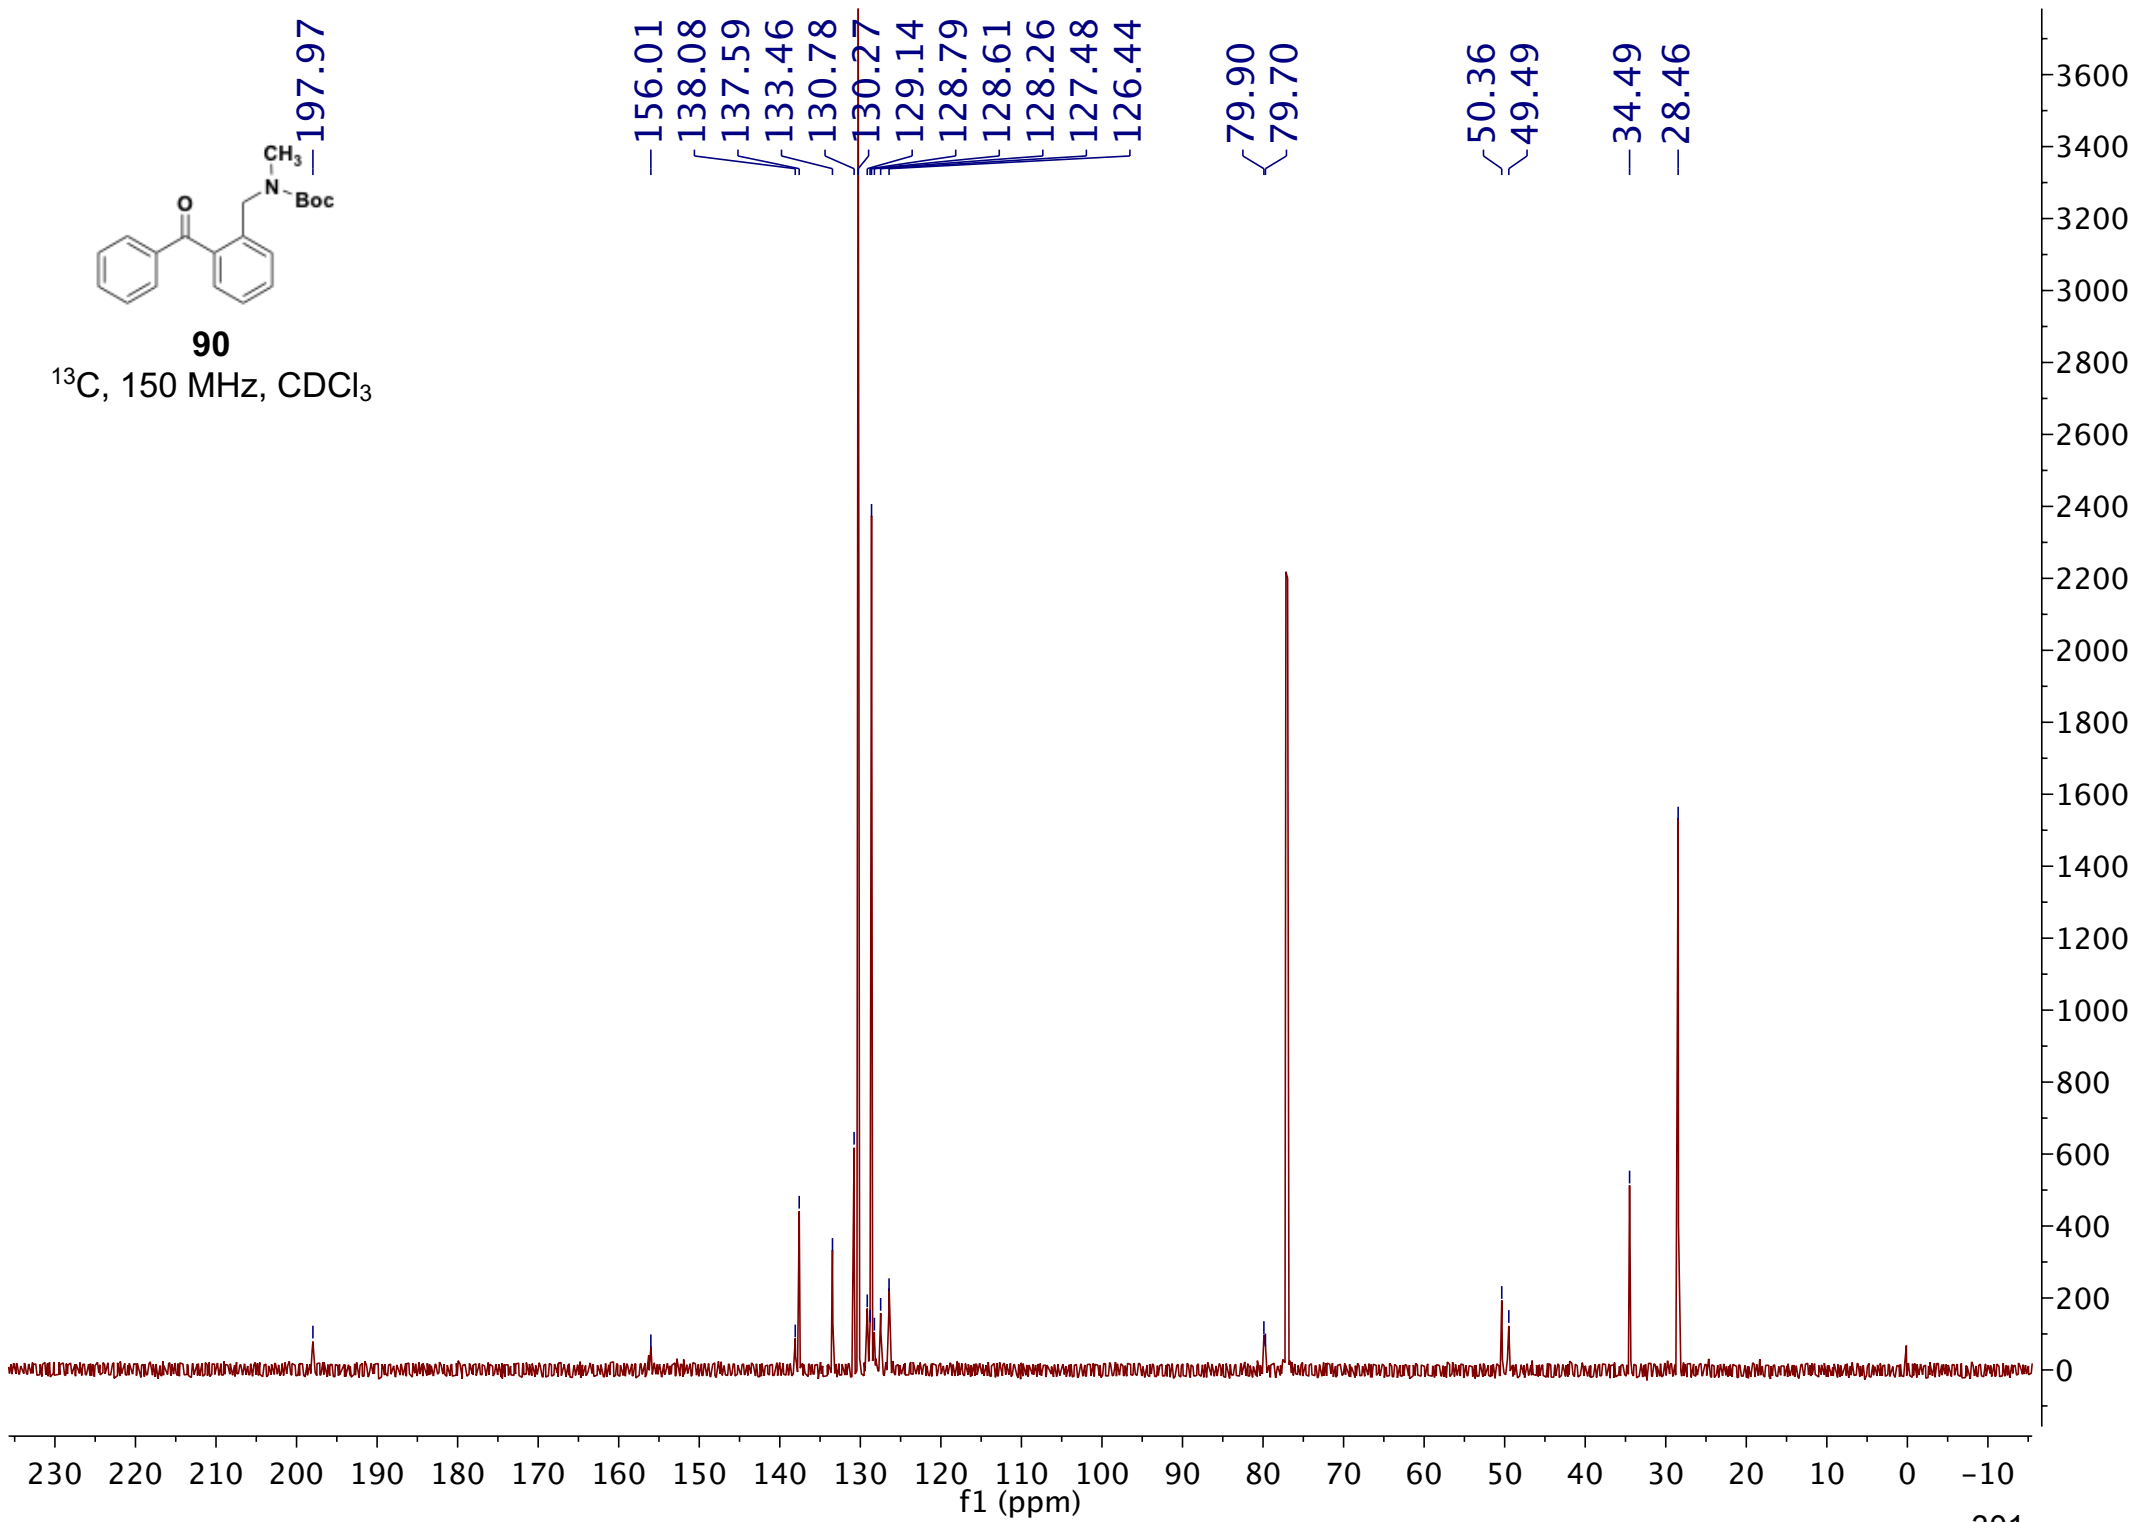

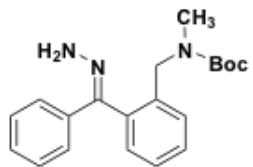

**24**

$^1\text{H}$ , 600 MHz,  $\text{CDCl}_3$

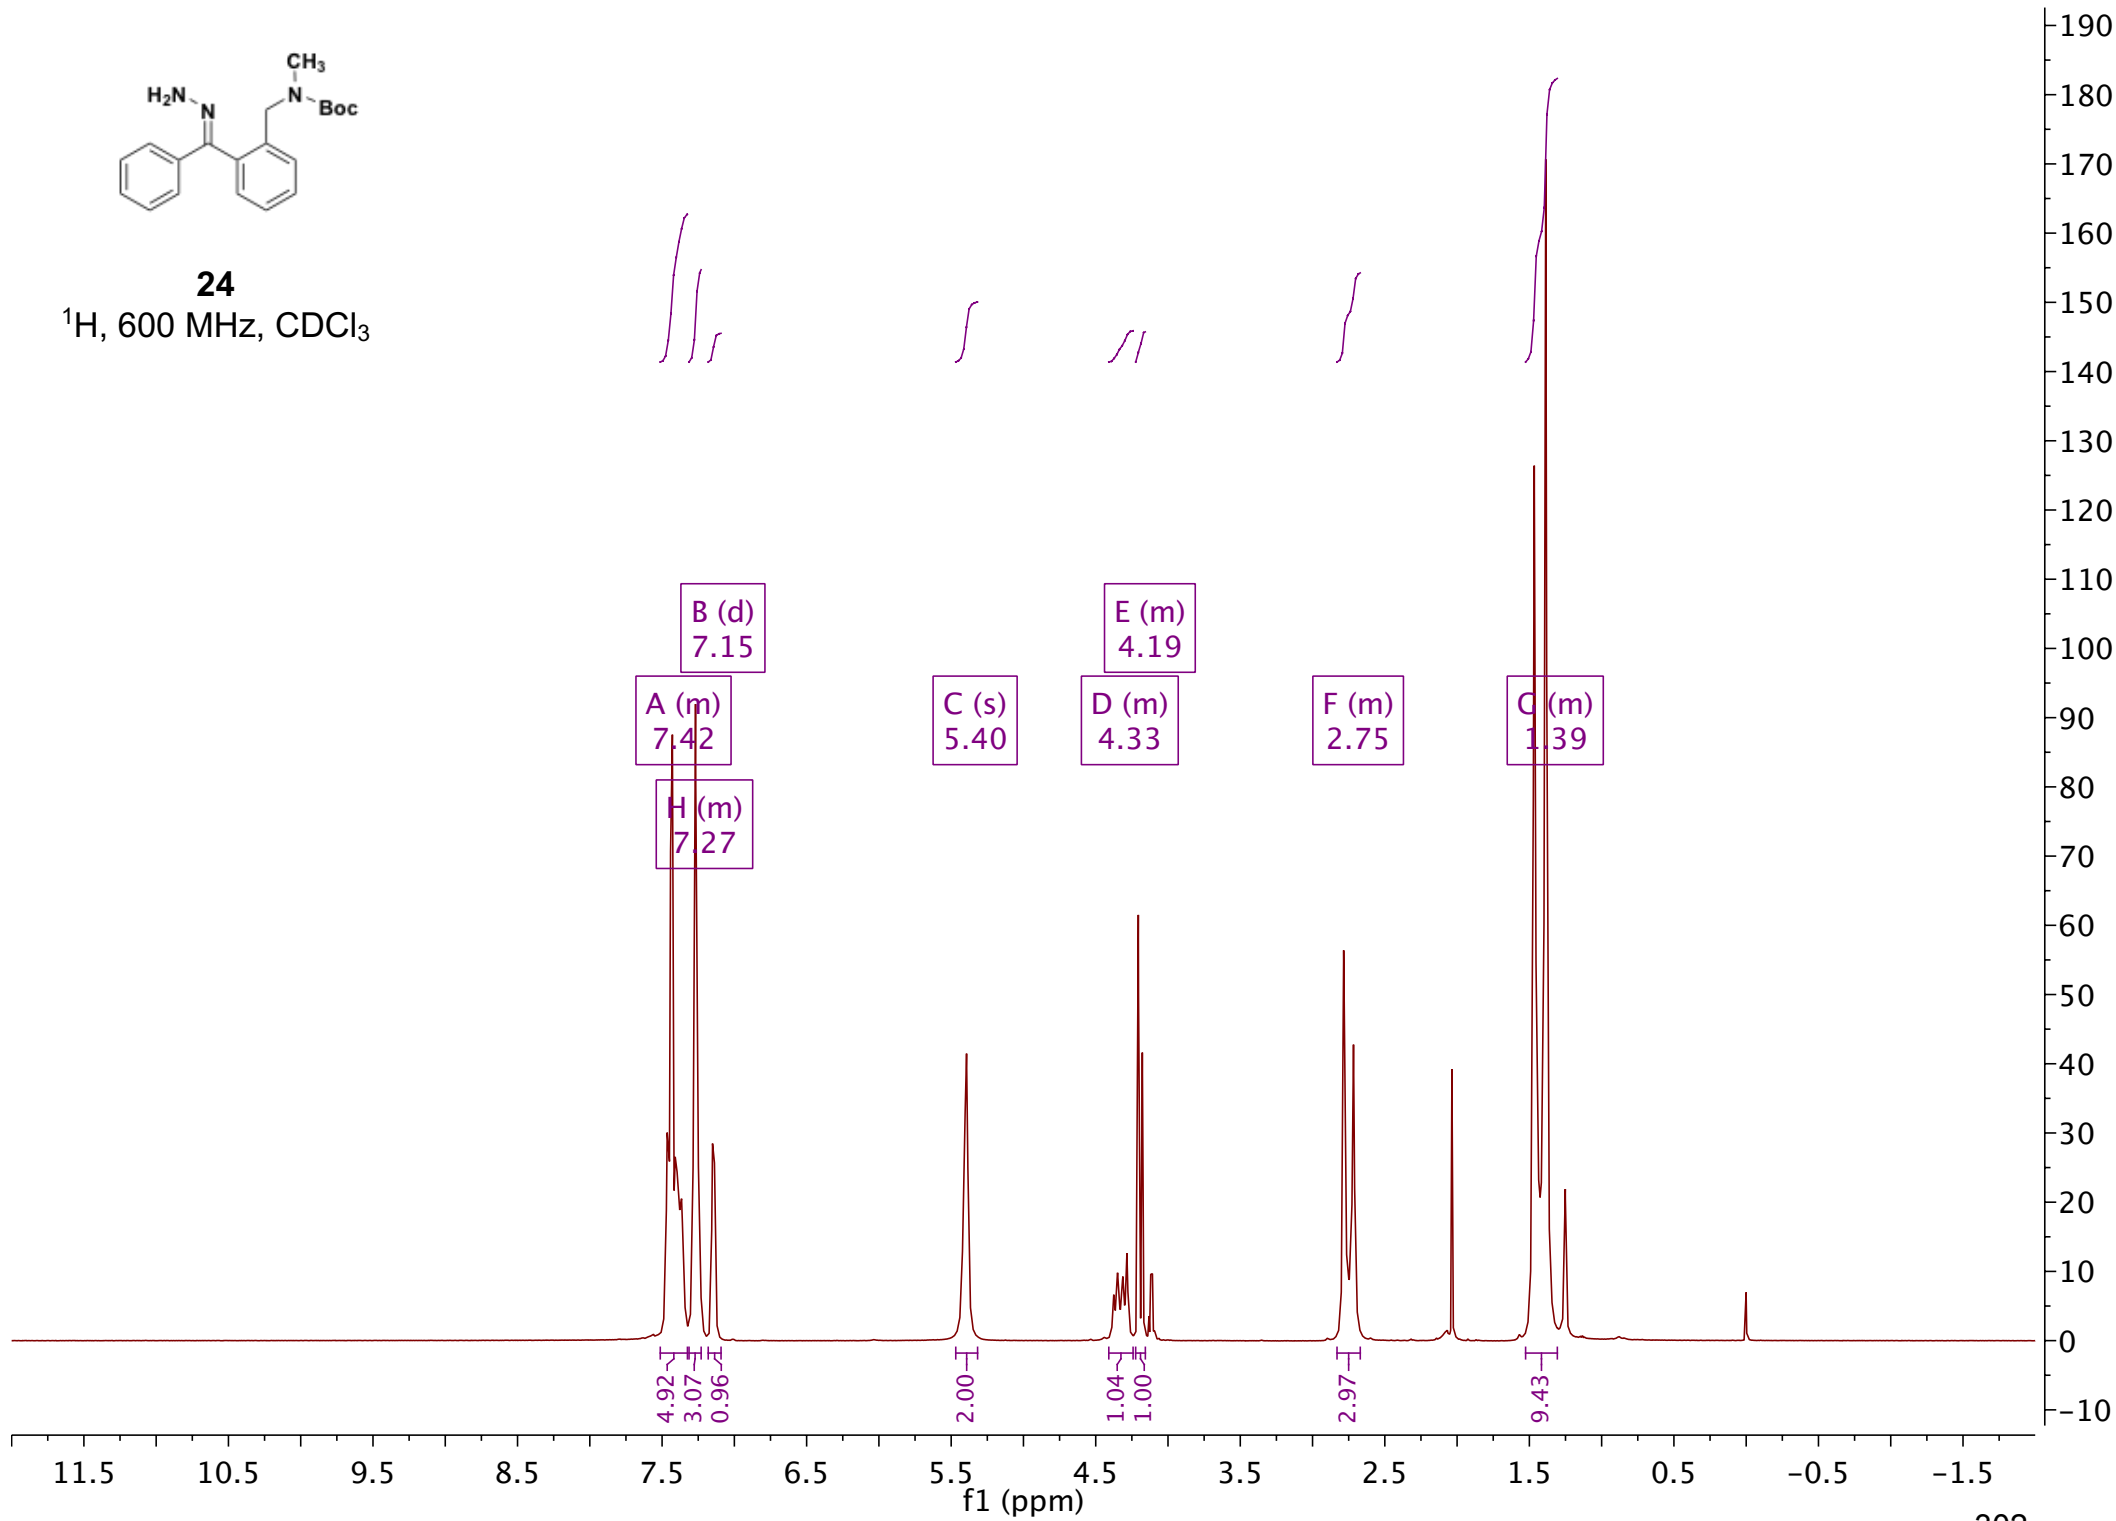

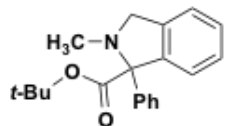

**26**

<sup>1</sup>H, 600 MHz, CDCl<sub>3</sub>

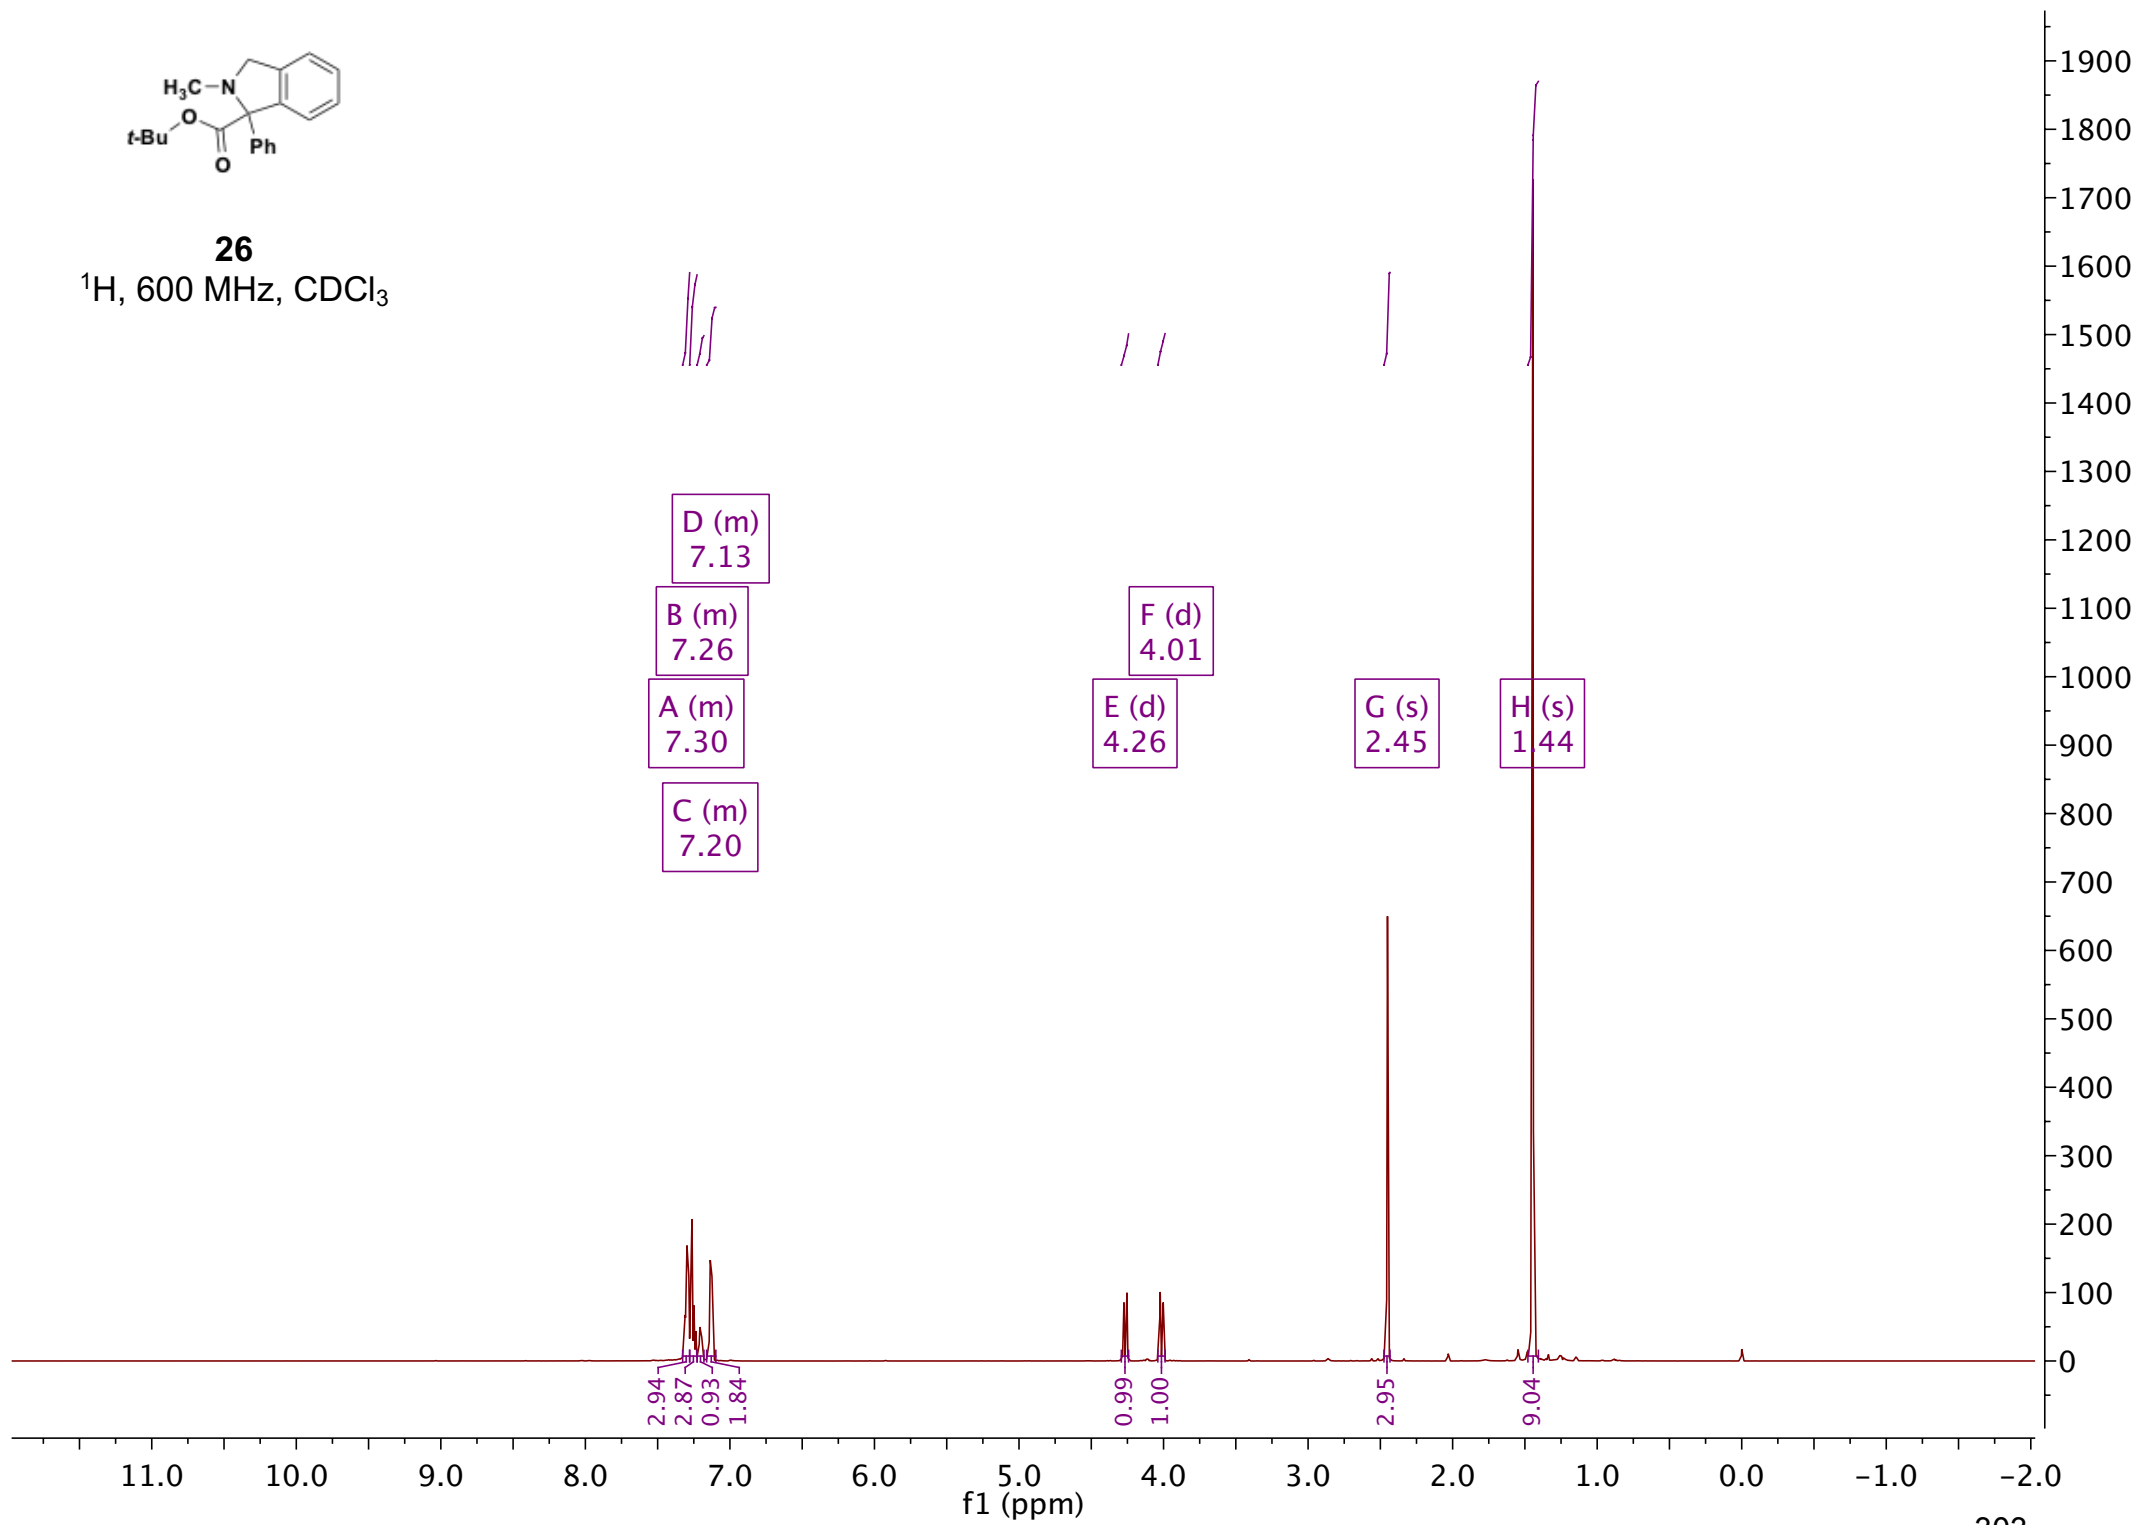

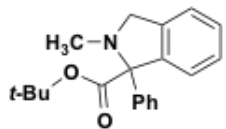

**26**

$^{13}\text{C}$ , 150 MHz,  $\text{CDCl}_3$

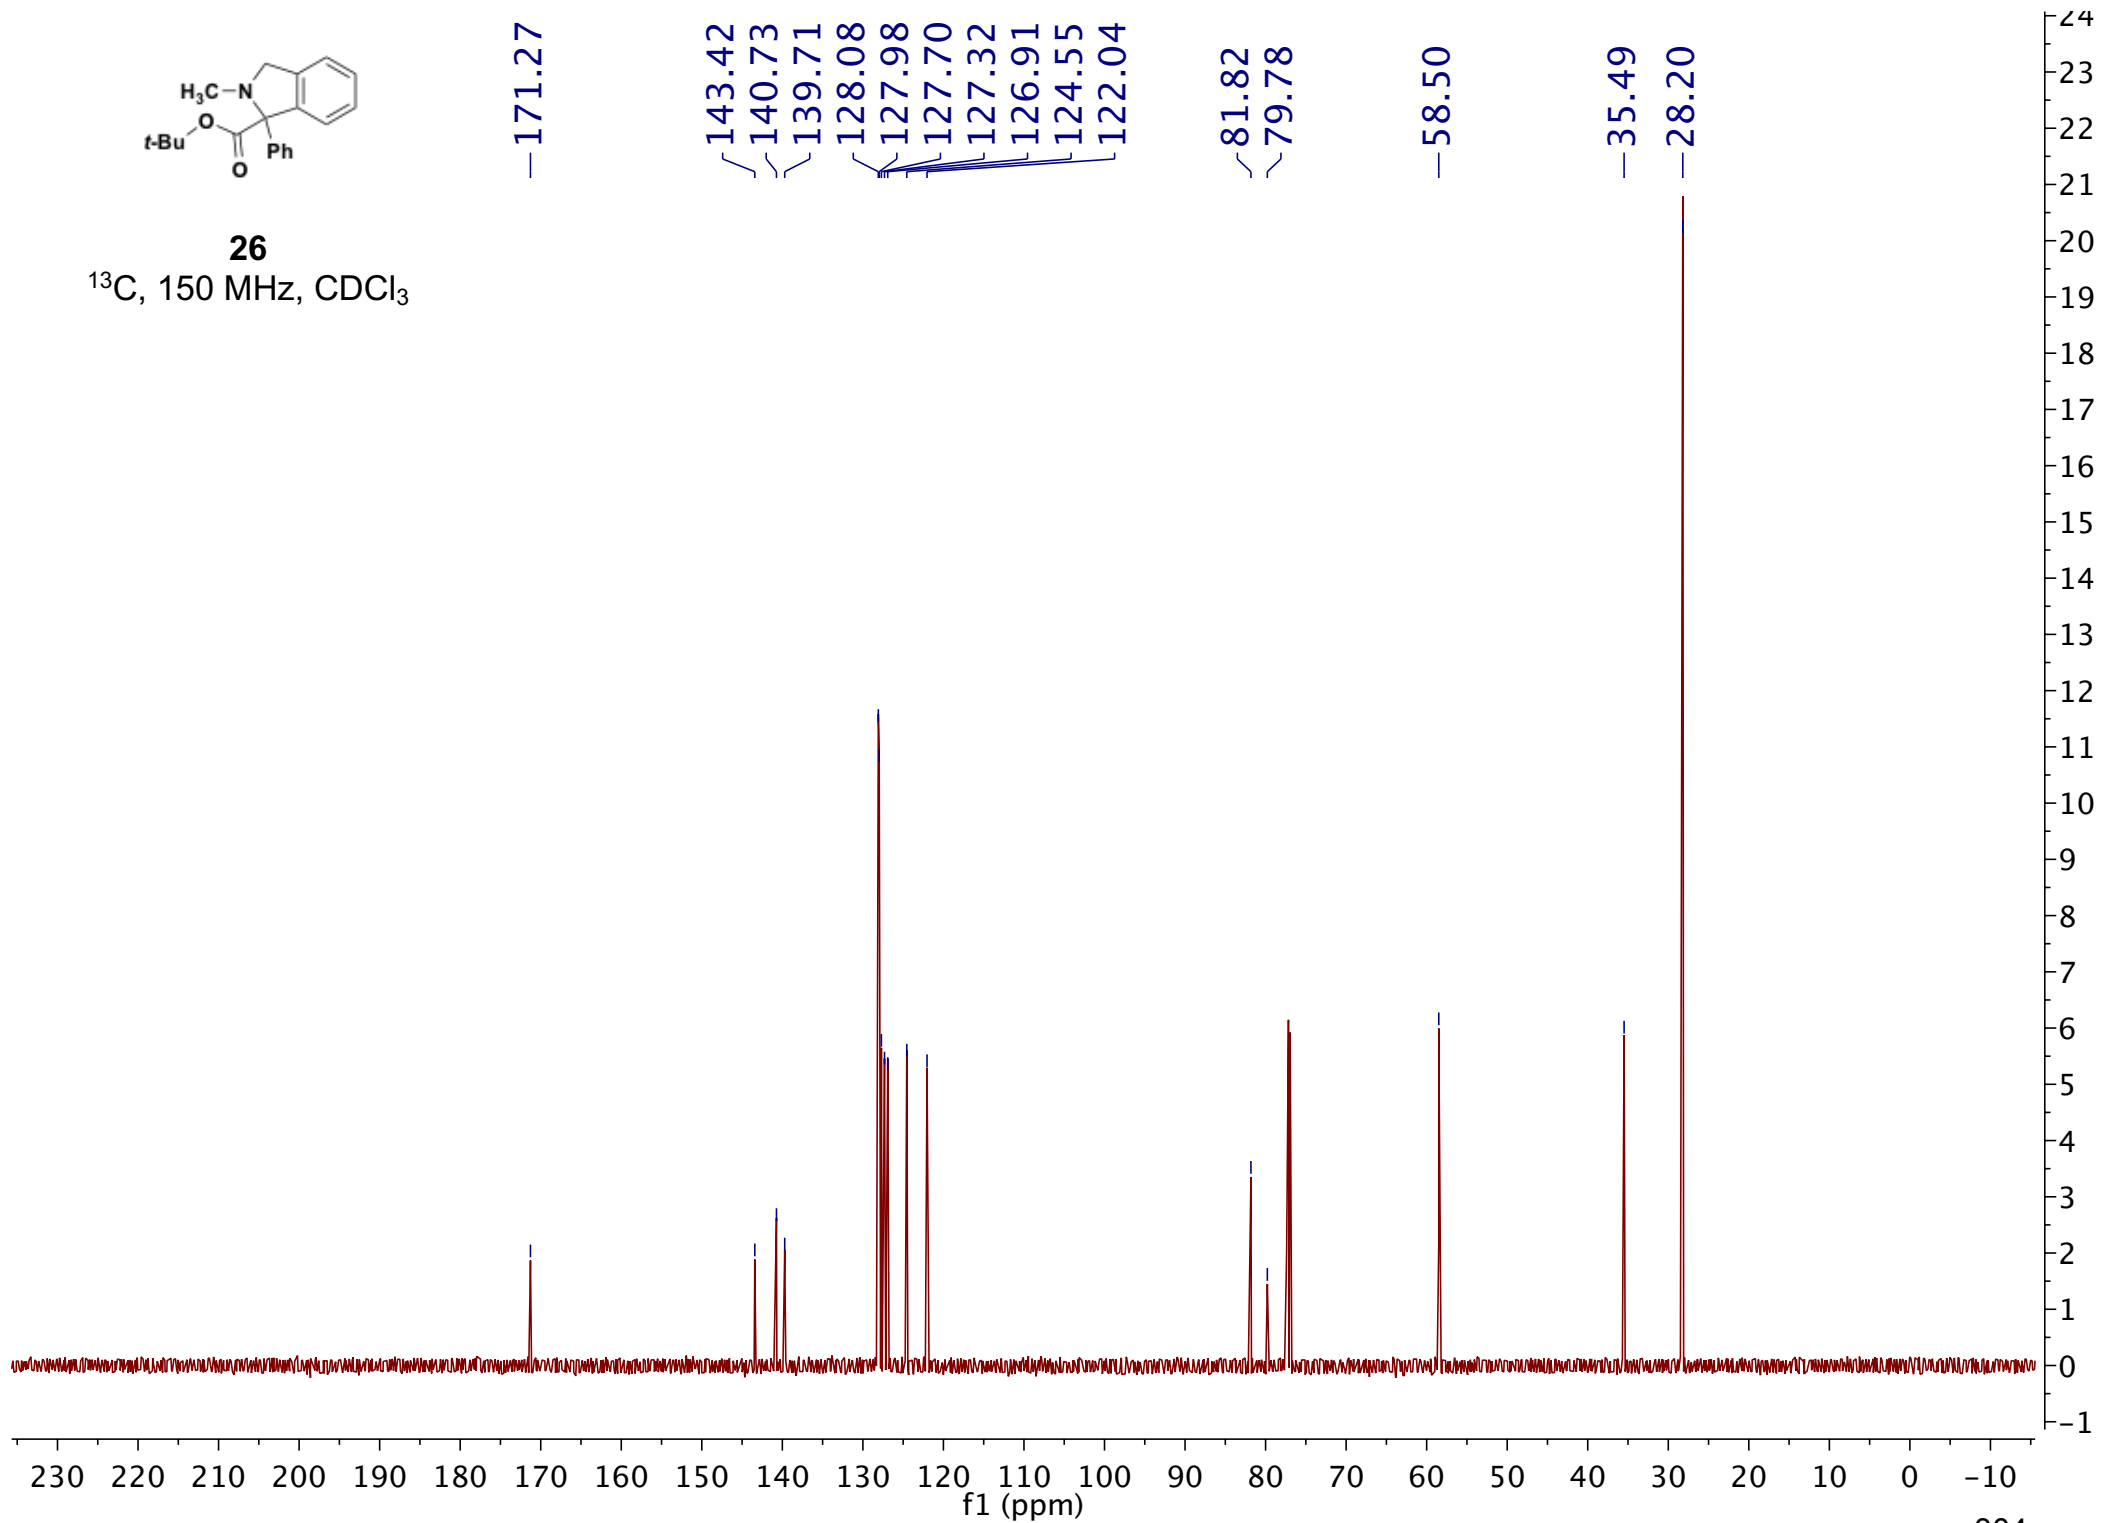

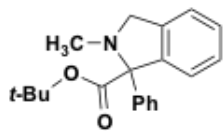

**26**  
 $^1\text{H}$ , 600 MHz,  $\text{C}_6\text{D}_6$

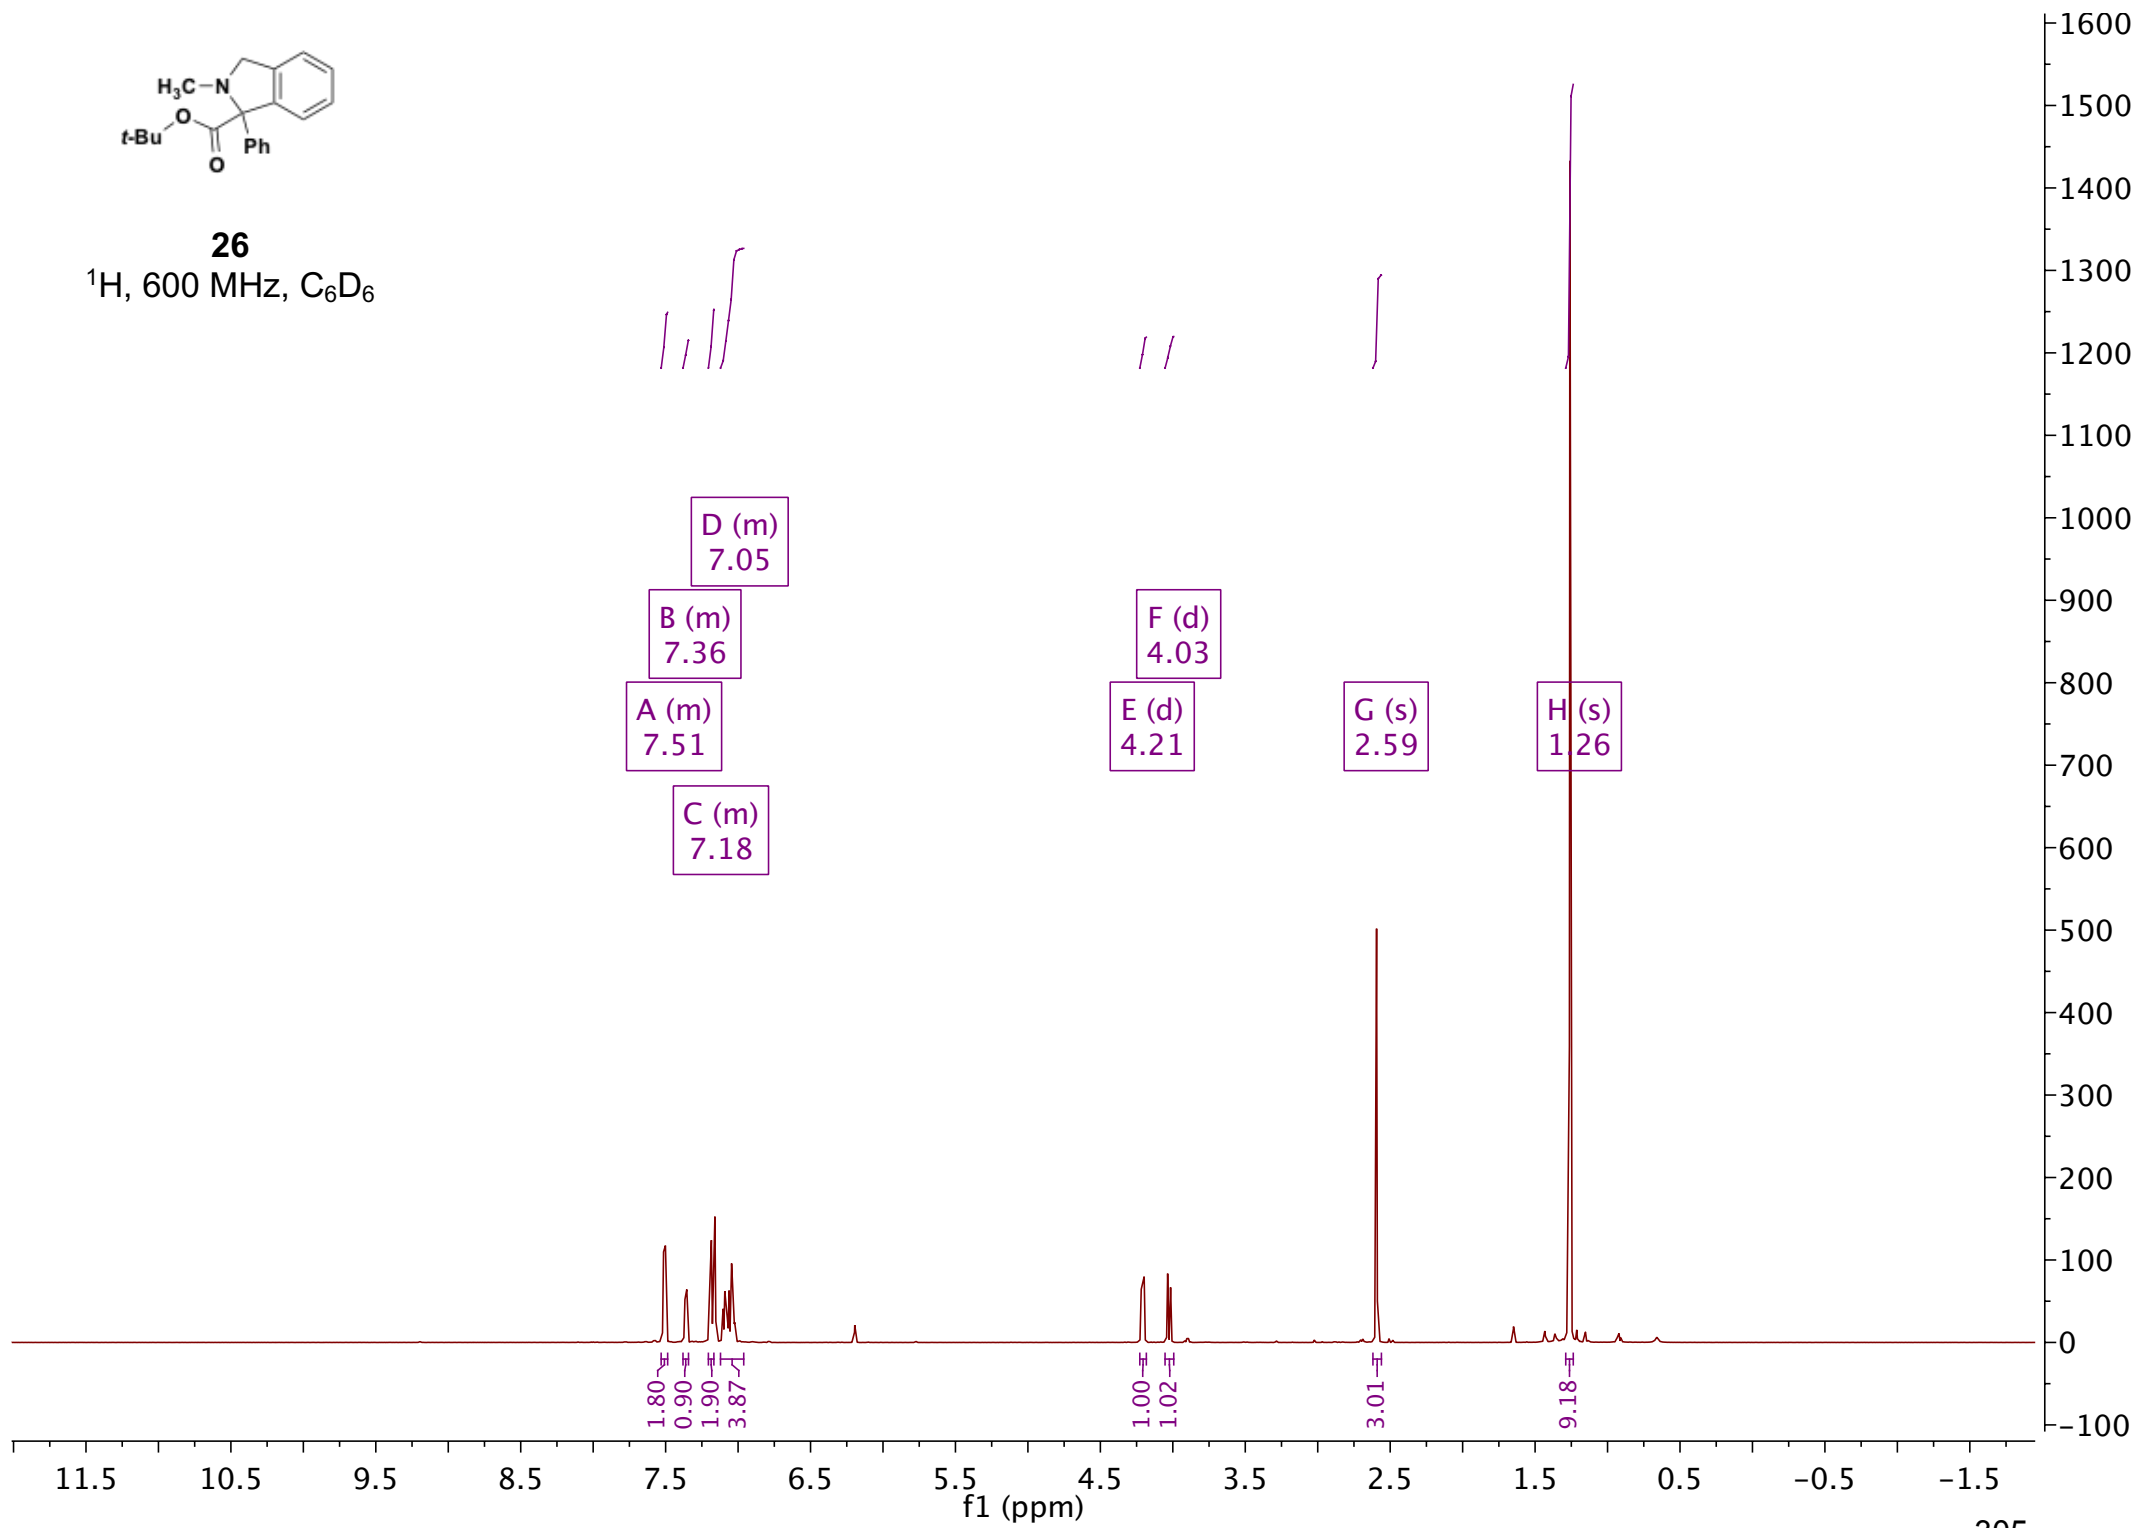

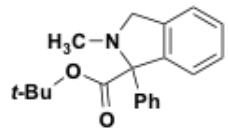

**26**

$^{13}\text{C}$ , 150 MHz,  $\text{C}_6\text{D}_6$

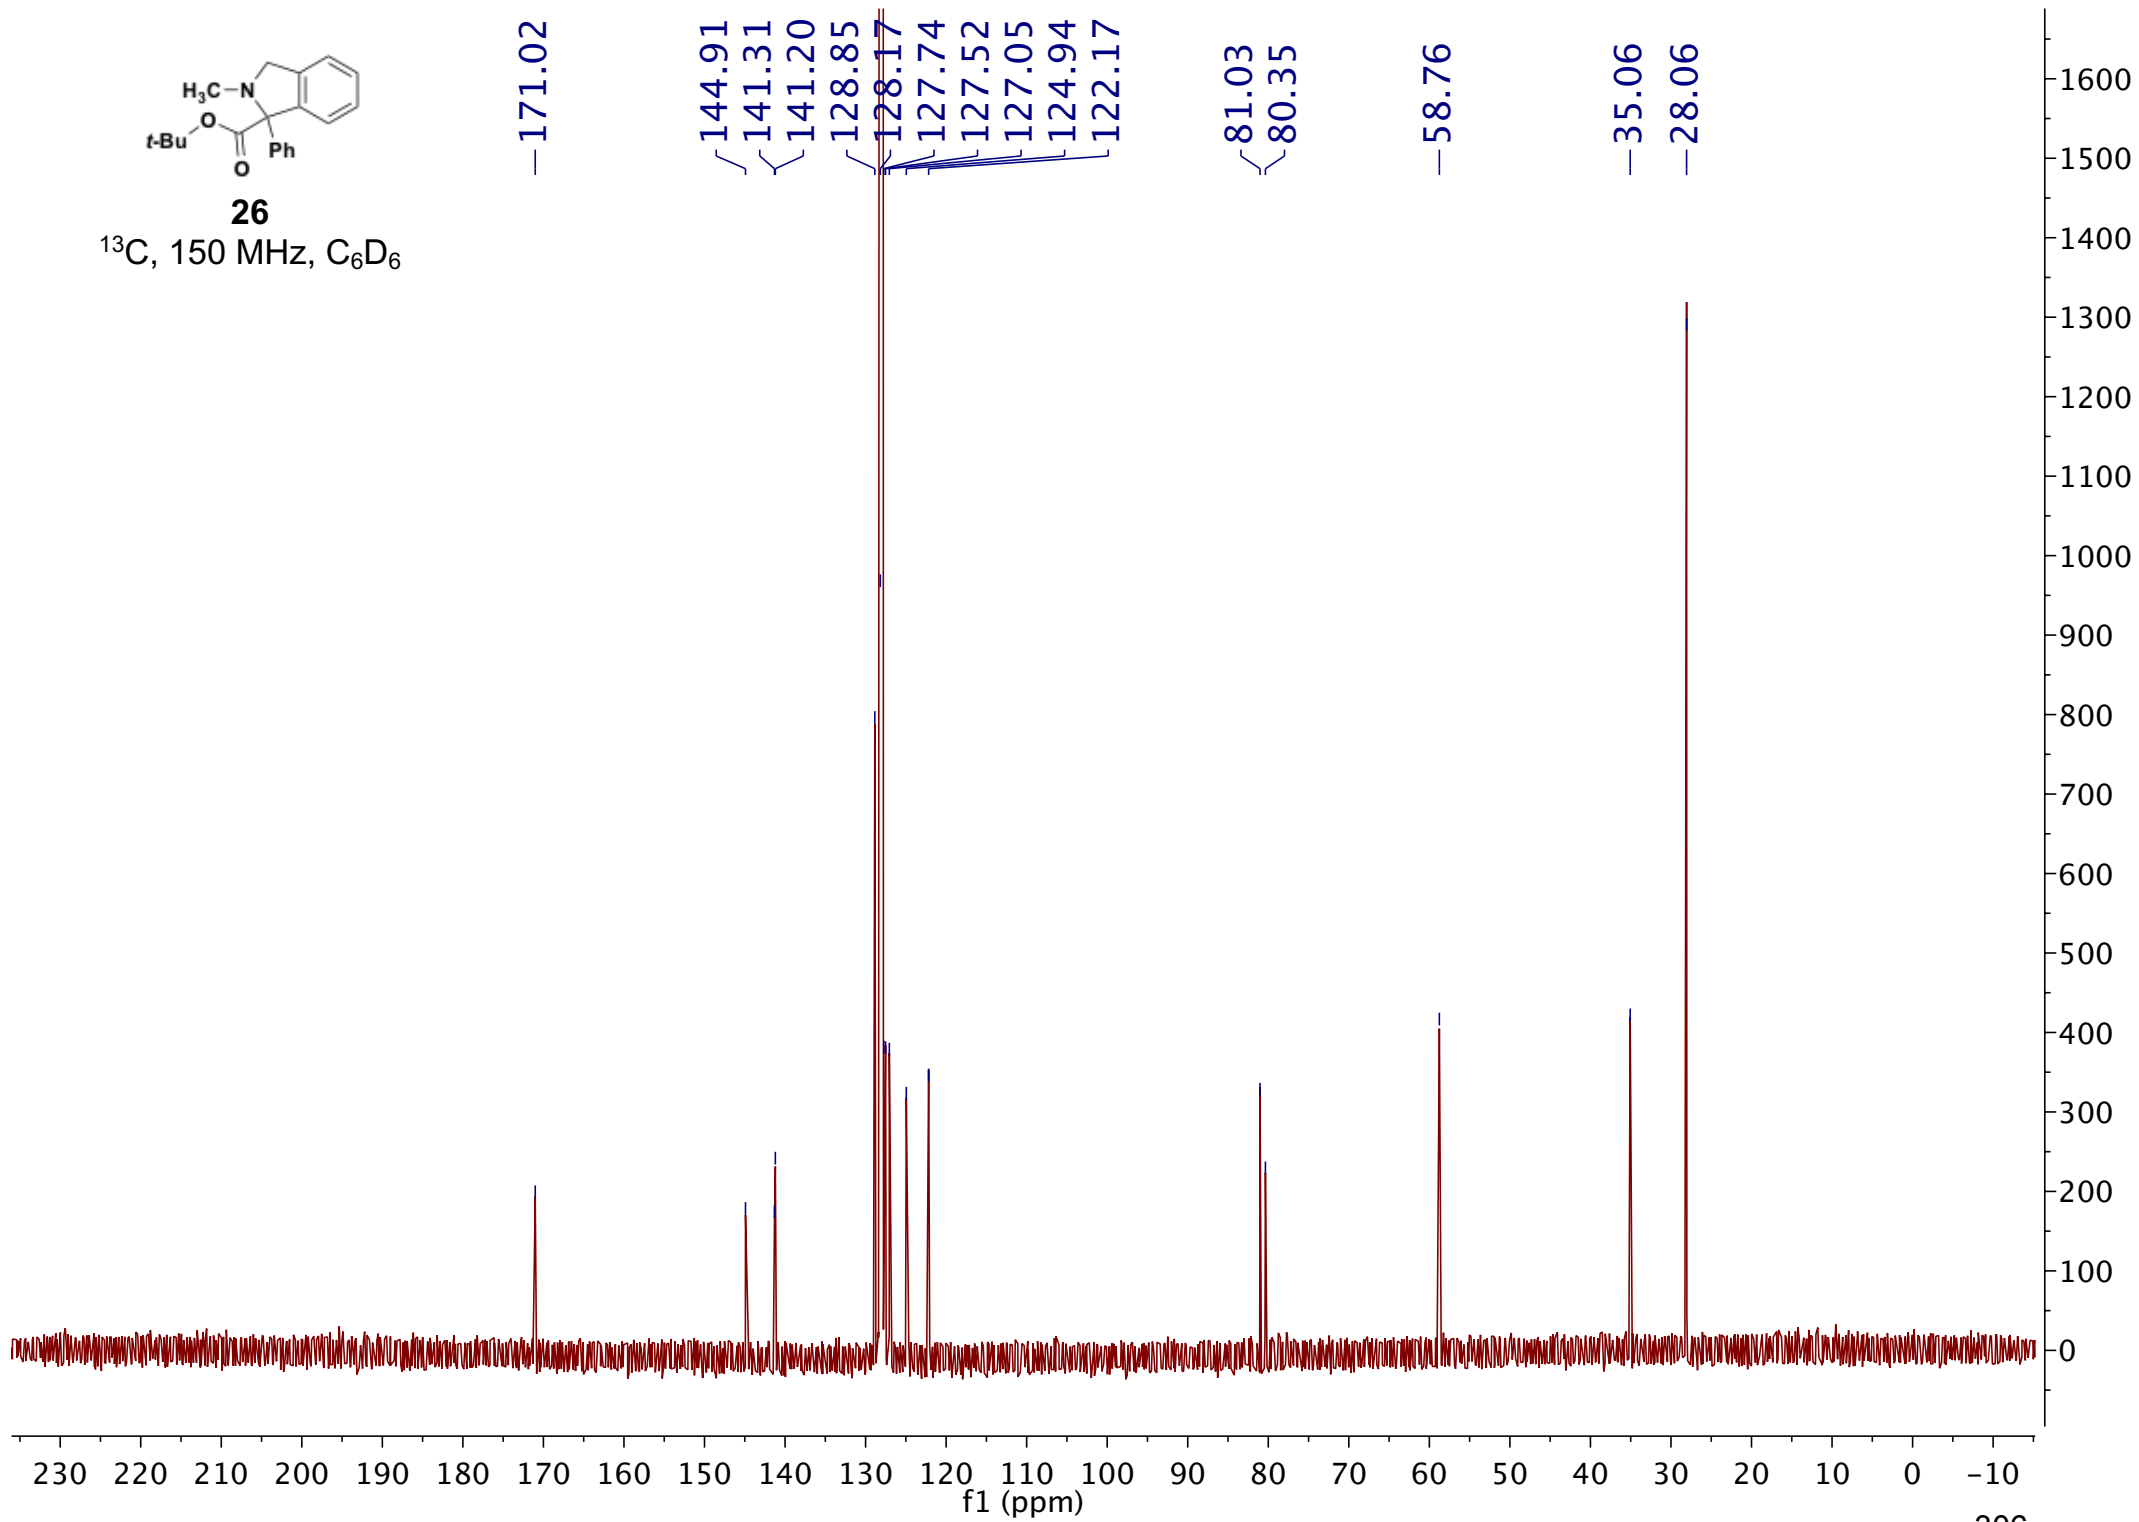

Supplement: SC-011-C9SC05111B-s002.pdf [file SC-011-C9SC05111B-s002.pdf]
